# Supplementary material for: The Immediate Early Response of Lens Epithelial Cells to Lens Injury
Source: MDPI journal article supplement (doi:10.3390/cells11213456), 2022-11-01
Supplement: s1 [file s1]

**Supplemental Table S2:** Primary antibodies used in this study

| Primary Antibody                | Fixation             | Blocking Buffer                              | Primary Antibody Conditions |
|---------------------------------|----------------------|----------------------------------------------|-----------------------------|
| EGR1 (4153, Cell Signaling)     | 4% PFA               | 2% BSA, 5% NGS, and 0.3% Triton X-100 in PBS | 1:100; overnight at 4°C     |
| FosB (MA5-15056, Invitrogen)    | 4% PFA               | 2% BSA, 5% NGS, and 0.3% Triton X-100 in PBS | 1:100; overnight at 4°C     |
| c-Fos (2250, Cell Signaling)    | 4% PFA               | 2% BSA, 5% NGS, and 0.3% Triton X-100 in PBS | 1:100; overnight at 4°C     |
| JunB (3753, Cell Signaling)     | 4% PFA               | 2% BSA, 5% NGS, and 0.3% Triton X-100 in PBS | 1:100; overnight at 4°C     |
| c-Jun (9165, Cell Signaling)    | 4% PFA               | 2% BSA, 5% NGS, and 0.3% Triton X-100 in PBS | 1:100; overnight at 4°C     |
| CXCL1 (12335-1-AP, Proteintech) | 1:1 Acetone-Methanol | 2% BSA in PBS                                | 1:100; overnight at 4°C     |
| COX-2/PTSG2 (ab15191, Abcam)    | 1:1 Acetone-Methanol | 2% BSA and 5% NGS in PBS                     | 1:200; 1 hour at RT         |

|                                   |                      |                                              |                         |
|-----------------------------------|----------------------|----------------------------------------------|-------------------------|
| S100a9 (ab203133, Abcam)          | 1:1 Acetone-Methanol | 2% BSA and 5% NGS in PBS                     | 1:100; overnight at 4°C |
| Tenascin C (T3413, Sigma-Aldrich) | 4% PFA               | 2% BSA in PBS                                | 1:200; overnight at 4°C |
| Gremlin-1 (PA5-13123, Invitrogen) | 4% PFA               | 2% BSA and 5% NGS in PBS                     | 1:200; overnight at 4°C |
| pERK (9101S, Cell Signaling)      | 4% PFA               | 2% BSA, 5% NGS, and 0.3% Triton X-100 in PBS | 1:100; overnight at 4°C |
