# Supplementary material for: The Immediate Early Response of Lens Epithelial Cells to Lens Injury
Source: MDPI journal article supplement (doi:10.3390/cells11213456), 2022-11-01
Supplement: s1 [file s1]

**Supplemental Table S1:** List of all qRT-PCR primers

| Gene  | Forward Primer                                  | Reverse Primer                                   |
|-------|-------------------------------------------------|--------------------------------------------------|
| EGR1  | 5'-AAC-CCT-ATG-<br>AGC-ACC-TGA-<br>CC-3'        | 5'-GAG-AAG-<br>CGG-CCA-GTA-<br>TAG-GT-3'         |
| FosB  | 5'-TAG-CTC-ATC-<br>ACC-CTC-CGC-<br>CGA-GTC-T-3' | 5'-AGG-GTG-GGT-<br>TGC-ACG-AGC-<br>CAC-TGA-AG-3' |
| GAPDH | 5'-CCG-CAT-CTT-<br>CTT-GTG-CAG-T-<br>3'         | 5'-GAA-TTT-TGC-<br>CGT-GAG-TGG-<br>AGT-3'        |
