# Supplementary material for: The Immediate Early Response of Lens Epithelial Cells to Lens Injury
Source: Cells. 2022 Nov 1;11(21):3456. doi: 10.3390/cells11213456 (PMC9654717; doi:10.3390/cells11213456)
Supplement: Supplementary file 1 [file cells-11-03456-s001.zip]

Archive with 8 entries (8 files):
- Supplemental Figure S1.tif
- Supplemental Table S1.pdf
- Supplemental Table S2.pdf
- Supplemental Table S3.xlsx
- Supplemental Table S4.xlsx
- Supplemental Table S5.xlsx
- Supplemental Table S6.xlsx
- Supplemental Table S7.xlsx
