# Supplementary material for: The Immediate Early Response of Lens Epithelial Cells to Lens Injury
Source: Cells. 2022 Nov 1;11(21):3456. doi: 10.3390/cells11213456 (PMC9654717; doi:10.3390/cells11213456)
Supplement: Supplementary file 1 [file cells-11-03456-s001.zip › Supplemental Table S3.xlsx]

## Sheet: Data Description
	Analysis Overview
	Pairwise differential expression contrast between wildtype lens epithelial cells (LEC) harvested at either 0 hours (WT_0H_DNA1) or 6 hours (WT_6H_DNA1) post cataract surgery. Samples were sequenced by DNA Link (DNA1). Paired end, 101 nucleotide reads were generated from ribo-depleted libraries. In this contrast, positive fold changes are associated with increased expression at 6 Hours (WT_6H_DNA1…
	Worksheet Specification
	Worksheet	Description
	Data Description	Describes each worksheet, provides analysis overview and define column headers for data sheets
	All genes	All genes measured in this experiment
	Statistically Significant	All gene differentially expressed with an absolute fold change > 2 and an FDR less than 0.05
	Biologically Significant	All genes meeting criteria for biologically significant differential expression
	Biological Significance Criteria Applied to RNA Sequencing based analysis of mouse corneas Jiang J, Shihan MH, Wang Y, Duncan MK. Invest Ophthalmol Vis Sci. 2018;59(12):4986-4997.
	Criterion			Implementation
	Statistical significance			filter( abs(logFC) > 1 and FDR < 0.05)
	"a change in mRNA level greater than 2 RPKM"			abs(average(RPKM-Condition1) - average(RPKM-Condition2) ) > 2
	"expression level in either condition is 2 RPKM or greater"			abs(average(RPKM-Condition1)) > 2 OR abs(average(RPKM-Condition1) > 2
	Quasi Likelihood F-Test: 6 vs 0 Hours PCS in wildtype mice
	criteria	Total	Up	Down
	Statistically Significant	913	785	128
	Biologically Significant	615	547	68
	Column Header Specification
	Column number (Workbook Letter)	Header		Description
	1 (A)	gene_id		the ensembl id of this feature
	2 (B)	SYMBOL		The symbol of the gene associated with this feature
	3 (C)	coding_length		The union-exon length of this gene, used to estimate FPKM
	4 (D)	DESCRIPTION		The long-form, descriptive name of this gene from the AnnotationHub dataset 'AH75036' – Mus musclus
	5 (E)	Fold_Change		The fold change of this gene between WT_6H_DNA1 and WT_0H_DNA1 in Lens Epithelium
	6 (F)	PValue		P_Value calculated by edgeR (WT_6H_DNA1 vs WT_0H_DNA1)
	7 (G)	FDR		Adjusted p value calculated by edgeR (WT_6H_DNA1 vs WT_0H_DNA1)
	8 (F)	WT_0H_DNA1_Avg_FPKM		Abundance of this gene (Average FPKM) observed in WT_0H_DNA1
	9 (G)	WT_6H_DNA1_Avg_FPKM		Abundance of this gene (Average FPKM) observed in WT_6H_DNA1

## Sheet: All Genes
gene_id	SYMBOL	coding_length	DESCRIPTION	Fold_Change	PValue	FDR	WT_0H_DNA1_Avg_FPKM	WT_6H_DNA1_Avg_FPKM
ENSMUSG00000034640	Tiparp	4358	TCDD-inducible poly(ADP-ribose) polymerase [Source:MGI Symbol;Acc:MGI:2159210]	5.93413	1.19018e-10	2.13993e-06	12.4398	59.2262
ENSMUSG00000029161	Cgref1	2082	cell growth regulator with EF hand domain 1 [Source:MGI Symbol;Acc:MGI:1915817]	23.9067	3.73059e-10	3.3538e-06	1.14607	21.789
ENSMUSG00000026479	Lamc2	8039	laminin, gamma 2 [Source:MGI Symbol;Acc:MGI:99913]	10.4911	2.28402e-09	1.36889e-05	1.50033	12.7468
ENSMUSG00000035621	Midn	4307	midnolin [Source:MGI Symbol;Acc:MGI:1890222]	5.82792	4.05991e-09	1.82493e-05	14.5641	68.1715
ENSMUSG00000070687	Htr1d	3201	5-hydroxytryptamine (serotonin) receptor 1D [Source:MGI Symbol;Acc:MGI:96276]	29.3721	7.24928e-09	2.3883e-05	0.535608	13.0585
ENSMUSG00000029708	Gcc1	5287	golgi coiled coil 1 [Source:MGI Symbol;Acc:MGI:1921625]	5.62996	7.96987e-09	2.3883e-05	4.50183	20.1672
ENSMUSG00000005483	Dnajb1	3204	DnaJ heat shock protein family (Hsp40) member B1 [Source:MGI Symbol;Acc:MGI:1931874]	7.14339	1.1834e-08	2.68646e-05	12.5192	71.6837
ENSMUSG00000071076	Jund	1668	jun D proto-oncogene [Source:MGI Symbol;Acc:MGI:96648]	5.72108	1.31135e-08	2.68646e-05	163.825	752.178
ENSMUSG00000056313	Tcim	1805	transcriptional and immune response regulator [Source:MGI Symbol;Acc:MGI:1916318]	11.2548	1.34472e-08	2.68646e-05	3.36698	30.8218
ENSMUSG00000027829	Ccnl1	5997	cyclin L1 [Source:MGI Symbol;Acc:MGI:1922664]	4.06186	2.3099e-08	3.50736e-05	10.31	33.4678
ENSMUSG00000028525	Pde4b	10560	phosphodiesterase 4B, cAMP specific [Source:MGI Symbol;Acc:MGI:99557]	9.47002	2.374e-08	3.50736e-05	0.918941	7.08543
ENSMUSG00000042608	Stk40	4117	serine/threonine kinase 40 [Source:MGI Symbol;Acc:MGI:1921428]	5.79562	2.43816e-08	3.50736e-05	5.31955	24.7979
ENSMUSG00000043702	Pde12	7725	phosphodiesterase 12 [Source:MGI Symbol;Acc:MGI:2443226]	4.8085	2.53591e-08	3.50736e-05	2.00002	7.69258
ENSMUSG00000021385	Ippk	4831	inositol 1,3,4,5,6-pentakisphosphate 2-kinase [Source:MGI Symbol;Acc:MGI:1922928]	6.79053	3.52237e-08	4.38865e-05	1.62944	8.8509
ENSMUSG00000033039	Micall1	8341	microtubule associated monooxygenase, calponin and LIM domain containing -like 1 [Source:MGI Symbol;Acc:MGI:105870]	2.9036	3.76518e-08	4.38865e-05	6.83294	16.0371
ENSMUSG00000020572	Nampt	5054	nicotinamide phosphoribosyltransferase [Source:MGI Symbol;Acc:MGI:1929865]	3.86996	3.97044e-08	4.38865e-05	7.468	23.1848
ENSMUSG00000027806	Tsc22d2	11244	TSC22 domain family, member 2 [Source:MGI Symbol;Acc:MGI:1919283]	5.20992	4.16119e-08	4.38865e-05	15.0379	62.9454
ENSMUSG00000050931	Sgms2	6227	sphingomyelin synthase 2 [Source:MGI Symbol;Acc:MGI:1921692]	7.91965	4.52219e-08	4.38865e-05	1.25851	7.98288
ENSMUSG00000071637	Cebpd	3746	CCAAT/enhancer binding protein (C/EBP), delta [Source:MGI Symbol;Acc:MGI:103573]	8.21911	4.80627e-08	4.38865e-05	9.21592	61.0603
ENSMUSG00000030208	Emp1	5935	epithelial membrane protein 1 [Source:MGI Symbol;Acc:MGI:107941]	51.2837	4.8817e-08	4.38865e-05	1.85428	76.356
ENSMUSG00000021127	Zfp36l1	2990	zinc finger protein 36, C3H type-like 1 [Source:MGI Symbol;Acc:MGI:107946]	9.75241	7.07417e-08	5.54623e-05	3.64131	28.8063
ENSMUSG00000023030	Slc11a2	6354	solute carrier family 11 (proton-coupled divalent metal ion transporters), member 2 [Source:MGI Symbol;Acc:MGI:1345279]	3.56443	7.26001e-08	5.54623e-05	3.49626	10.0323
ENSMUSG00000035929	H2-Q4	2596	histocompatibility 2, Q region locus 4 [Source:MGI Symbol;Acc:MGI:95933]	16.8945	7.31128e-08	5.54623e-05	6.16965	82.4329
ENSMUSG00000037876	Jmjd1c	17822	jumonji domain containing 1C [Source:MGI Symbol;Acc:MGI:1918614]	3.97297	7.4032e-08	5.54623e-05	11.1065	35.2338
ENSMUSG00000050910	Cdr2l	3700	cerebellar degeneration-related protein 2-like [Source:MGI Symbol;Acc:MGI:2684867]	9.7904	8.12756e-08	5.65839e-05	1.35075	10.5175
ENSMUSG00000026558	Uck2	5464	uridine-cytidine kinase 2 [Source:MGI Symbol;Acc:MGI:1931744]	6.03539	8.18233e-08	5.65839e-05	6.37574	30.9462
ENSMUSG00000028849	Map7d1	3652	MAP7 domain containing 1 [Source:MGI Symbol;Acc:MGI:2384297]	3.36595	8.76743e-08	5.83846e-05	34.56	93.8988
ENSMUSG00000056708	Ier5	3276	immediate early response 5 [Source:MGI Symbol;Acc:MGI:1337072]	12.304	9.63216e-08	5.95139e-05	5.54902	55.8215
ENSMUSG00000009291	Pttg1ip	3877	pituitary tumor-transforming 1 interacting protein [Source:MGI Symbol;Acc:MGI:2652132]	3.63845	9.81739e-08	5.95139e-05	10.8805	31.7825
ENSMUSG00000028063	Lmna	5838	lamin A [Source:MGI Symbol;Acc:MGI:96794]	7.48811	1.03448e-07	5.95139e-05	20.7378	125.124
ENSMUSG00000018476	Kdm6b	6954	KDM1 lysine (K)-specific demethylase 6B [Source:MGI Symbol;Acc:MGI:2448492]	6.50365	1.03465e-07	5.95139e-05	17.4592	91.8843
ENSMUSG00000035356	Nfkbiz	5018	nuclear factor of kappa light polypeptide gene enhancer in B cells inhibitor, zeta [Source:MGI Symbol;Acc:MGI:1931595]	7.32418	1.10229e-07	5.95139e-05	5.90451	34.497
ENSMUSG00000038552	Fndc4	3039	fibronectin type III domain containing 4 [Source:MGI Symbol;Acc:MGI:1917195]	4.04269	1.1064e-07	5.95139e-05	10.8429	35.1852
ENSMUSG00000021890	Eaf1	5490	ELL associated factor 1 [Source:MGI Symbol;Acc:MGI:1921677]	3.32013	1.1254e-07	5.95139e-05	9.67039	25.908
ENSMUSG00000032497	Lrrfip2	6334	leucine rich repeat (in FLII) interacting protein 2 [Source:MGI Symbol;Acc:MGI:1918518]	2.90713	1.43081e-07	7.35027e-05	11.6446	27.1179
ENSMUSG00000037533	Rapgef6	13295	Rap guanine nucleotide exchange factor (GEF) 6 [Source:MGI Symbol;Acc:MGI:2384761]	3.76552	1.51395e-07	7.56133e-05	2.5317	7.57192
ENSMUSG00000034751	Mast4	32326	microtubule associated serine/threonine kinase family member 4 [Source:MGI Symbol;Acc:MGI:1918885]	3.36821	1.56739e-07	7.61666e-05	3.12074	8.46317
ENSMUSG00000046962	Zbtb21	6335	zinc finger and BTB domain containing 21 [Source:MGI Symbol;Acc:MGI:1927240]	3.27163	1.64908e-07	7.7443e-05	5.97252	15.6264
ENSMUSG00000037552	Plekhg2	6797	pleckstrin homology domain containing, family G (with RhoGef domain) member 2 [Source:MGI Symbol;Acc:MGI:2141874]	3.51445	1.71091e-07	7.7443e-05	4.14929	11.6884
ENSMUSG00000074151	Nlrc5	8493	NLR family, CARD domain containing 5 [Source:MGI Symbol;Acc:MGI:3612191]	12.5578	1.72287e-07	7.7443e-05	0.229463	2.3396
ENSMUSG00000042507	Elmsan1	7611	ELM2 and Myb/SANT-like domain containing 1 [Source:MGI Symbol;Acc:MGI:2685106]	3.64559	1.84348e-07	8.08433e-05	8.5745	24.9747
ENSMUSG00000004455	Ppp1cc	3424	protein phosphatase 1 catalytic subunit gamma [Source:MGI Symbol;Acc:MGI:104872]	2.98842	2.13732e-07	9.14977e-05	10.3677	24.7321
ENSMUSG00000116657	Gm49774	10812	predicted gene, 49774 [Source:MGI Symbol;Acc:MGI:6215288]	8.7032	2.28206e-07	9.54218e-05	0.219979	1.56511
ENSMUSG00000026663	Atf6	9231	activating transcription factor 6 [Source:MGI Symbol;Acc:MGI:1926157]	2.97619	2.35557e-07	9.62572e-05	5.42372	12.8937
ENSMUSG00000041319	Thoc6	2026	THO complex 6 [Source:MGI Symbol;Acc:MGI:2677480]	4.42514	2.49859e-07	9.98327e-05	2.82468	10.0082
ENSMUSG00000039646	Vasn	3007	vasorin [Source:MGI Symbol;Acc:MGI:2177651]	4.42974	2.58037e-07	0.000100859	11.9739	43.3025
ENSMUSG00000024014	Pim1	3362	proviral integration site 1 [Source:MGI Symbol;Acc:MGI:97584]	5.45583	2.76871e-07	0.000105918	19.3208	86.0511
ENSMUSG00000028862	Map3k6	4604	mitogen-activated protein kinase kinase kinase 6 [Source:MGI Symbol;Acc:MGI:1855691]	4.98441	2.9084e-07	0.00010747	1.06182	4.29292
ENSMUSG00000015312	Gadd45b	1589	growth arrest and DNA-damage-inducible 45 beta [Source:MGI Symbol;Acc:MGI:107776]	5.14682	3.06211e-07	0.00010747	13.5128	55.723
ENSMUSG00000035671	Zswim4	4625	zinc finger SWIM-type containing 4 [Source:MGI Symbol;Acc:MGI:2443726]	3.17921	3.16759e-07	0.00010747	7.02663	17.9998
ENSMUSG00000073700	Klhl21	3986	kelch-like 21 [Source:MGI Symbol;Acc:MGI:1919288]	2.98247	3.28889e-07	0.00010747	9.87485	23.6502
ENSMUSG00000031530	Dusp4	2740	dual specificity phosphatase 4 [Source:MGI Symbol;Acc:MGI:2442191]	6.62743	3.30278e-07	0.00010747	6.02835	31.7618
ENSMUSG00000024486	Hbegf	4834	heparin-binding EGF-like growth factor [Source:MGI Symbol;Acc:MGI:96070]	4.75719	3.30441e-07	0.00010747	26.6438	102.779
ENSMUSG00000001131	Timp1	888	tissue inhibitor of metalloproteinase 1 [Source:MGI Symbol;Acc:MGI:98752]	5.17838	3.33332e-07	0.00010747	2.80964	11.6816
ENSMUSG00000038612	Mcl1	3418	myeloid cell leukemia sequence 1 [Source:MGI Symbol;Acc:MGI:101769]	2.96491	3.33865e-07	0.00010747	41.9309	100.423
ENSMUSG00000020400	Tnip1	3539	TNFAIP3 interacting protein 1 [Source:MGI Symbol;Acc:MGI:1926194]	3.64151	3.34722e-07	0.00010747	12.1741	35.7268
ENSMUSG00000001627	Ifrd1	5858	interferon-related developmental regulator 1 [Source:MGI Symbol;Acc:MGI:1316717]	7.30939	3.44867e-07	0.000108229	9.07602	53.1425
ENSMUSG00000007812	Zfp655	5598	zinc finger protein 655 [Source:MGI Symbol;Acc:MGI:1919861]	2.85914	3.52034e-07	0.000108229	8.45873	19.4768
ENSMUSG00000103313	Gm38357	2464	predicted gene, 38357 [Source:MGI Symbol;Acc:MGI:5611585]	9.42906	3.55145e-07	0.000108229	1.70501	12.975
ENSMUSG00000018171	Vmp1	3862	vacuole membrane protein 1 [Source:MGI Symbol;Acc:MGI:1923159]	3.59808	3.7333e-07	0.000111875	6.82632	19.9558
ENSMUSG00000032014	Oaf	2629	out at first homolog [Source:MGI Symbol;Acc:MGI:94852]	3.09641	3.95443e-07	0.000116558	13.9578	34.6764
ENSMUSG00000000628	Hk2	5969	hexokinase 2 [Source:MGI Symbol;Acc:MGI:1315197]	3.55374	4.19445e-07	0.000120234	28.1291	81.0257
ENSMUSG00000031309	Rps6ka3	8322	ribosomal protein S6 kinase polypeptide 3 [Source:MGI Symbol;Acc:MGI:104557]	3.1452	4.21288e-07	0.000120234	4.29823	10.8076
ENSMUSG00000020023	Tmcc3	7153	transmembrane and coiled coil domains 3 [Source:MGI Symbol;Acc:MGI:2442900]	2.9999	4.31966e-07	0.000120441	11.5616	27.8254
ENSMUSG00000024907	Gal	788	galanin and GMAP prepropeptide [Source:MGI Symbol;Acc:MGI:95637]	11.9207	4.42176e-07	0.000120441	0.895723	8.68437
ENSMUSG00000031825	Crispld2	4777	cysteine-rich secretory protein LCCL domain containing 2 [Source:MGI Symbol;Acc:MGI:1926142]	7.98352	4.43236e-07	0.000120441	3.27454	21.349
ENSMUSG00000019864	Rtn4ip1	4554	reticulon 4 interacting protein 1 [Source:MGI Symbol;Acc:MGI:2178759]	4.62618	4.48808e-07	0.000120441	3.27139	12.0906
ENSMUSG00000017929	B4galt5	4308	UDP-Gal:betaGlcNAc beta 1,4-galactosyltransferase, polypeptide 5 [Source:MGI Symbol;Acc:MGI:1927169]	4.93119	4.68263e-07	0.000123746	4.12076	16.1526
ENSMUSG00000024843	Chka	12024	choline kinase alpha [Source:MGI Symbol;Acc:MGI:107760]	7.42584	4.81737e-07	0.000123746	9.72097	56.8091
ENSMUSG00000015605	Srf	2893	serum response factor [Source:MGI Symbol;Acc:MGI:106658]	5.07439	4.85811e-07	0.000123746	6.20996	25.525
ENSMUSG00000008348	Ubc	2893	ubiquitin C [Source:MGI Symbol;Acc:MGI:98889]	2.87494	4.8865e-07	0.000123746	23.8955	55.2108
ENSMUSG00000000567	Sox9	4135	SRY (sex determining region Y)-box 9 [Source:MGI Symbol;Acc:MGI:98371]	6.70196	5.11149e-07	0.000127645	31.3943	171.899
ENSMUSG00000042622	Maff	2594	v-maf musculoaponeurotic fibrosarcoma oncogene family, protein F (avian) [Source:MGI Symbol;Acc:MGI:96910]	8.81895	5.32935e-07	0.000131263	12.5504	89.6381
ENSMUSG00000006301	Tmbim1	12659	transmembrane BAX inhibitor motif containing 1 [Source:MGI Symbol;Acc:MGI:1916910]	2.81174	5.42931e-07	0.000131918	2.80607	6.32219
ENSMUSG00000022114	Spry2	2087	sprouty RTK signaling antagonist 2 [Source:MGI Symbol;Acc:MGI:1345138]	3.91566	5.65342e-07	0.000134511	12.8751	40.9216
ENSMUSG00000014599	Csf1	5281	colony stimulating factor 1 (macrophage) [Source:MGI Symbol;Acc:MGI:1339753]	6.24815	5.7581e-07	0.000134511	4.32653	21.8779
ENSMUSG00000003752	Itpkc	5285	inositol 1,4,5-trisphosphate 3-kinase C [Source:MGI Symbol;Acc:MGI:2442554]	8.75622	5.81661e-07	0.000134511	2.29945	16.3303
ENSMUSG00000034595	Ppp1r18	4317	protein phosphatase 1, regulatory subunit 18 [Source:MGI Symbol;Acc:MGI:1923698]	4.30717	5.83531e-07	0.000134511	3.29706	11.6274
ENSMUSG00000025372	Baiap2	4992	brain-specific angiogenesis inhibitor 1-associated protein 2 [Source:MGI Symbol;Acc:MGI:2137336]	6.18813	6.28451e-07	0.000141268	2.92564	14.4179
ENSMUSG00000039384	Dusp10	3042	dual specificity phosphatase 10 [Source:MGI Symbol;Acc:MGI:1927070]	6.18048	6.29836e-07	0.000141268	3.26511	16.3311
ENSMUSG00000030259	Rassf8	5559	Ras association (RalGDS/AF-6) domain family (N-terminal) member 8 [Source:MGI Symbol;Acc:MGI:1918573]	3.00547	6.36413e-07	0.000141268	8.10173	19.7082
ENSMUSG00000018932	Map2k3	3314	mitogen-activated protein kinase kinase 3 [Source:MGI Symbol;Acc:MGI:1346868]	3.80364	6.56562e-07	0.000142977	12.1428	36.9411
ENSMUSG00000061589	Dot1l	8705	DOT1-like, histone H3 methyltransferase (S. cerevisiae) [Source:MGI Symbol;Acc:MGI:2143886]	4.44647	6.60015e-07	0.000142977	6.2754	22.0405
ENSMUSG00000032501	Trib1	6248	tribbles pseudokinase 1 [Source:MGI Symbol;Acc:MGI:2443397]	5.65724	7.05206e-07	0.000150948	17.1292	78.5018
ENSMUSG00000025283	Sat1	2774	spermidine/spermine N1-acetyl transferase 1 [Source:MGI Symbol;Acc:MGI:98233]	3.36459	7.19891e-07	0.000152278	9.62215	25.9398
ENSMUSG00000030172	Erc1	16271	ELKS/RAB6-interacting/CAST family member 1 [Source:MGI Symbol;Acc:MGI:2151013]	3.84063	7.3296e-07	0.0001532	7.84078	23.8379
ENSMUSG00000034006	Pqlc1	6105	PQ loop repeat containing 1 [Source:MGI Symbol;Acc:MGI:1914193]	3.46531	7.41289e-07	0.0001532	2.35716	6.51457
ENSMUSG00000019960	Dusp6	3132	dual specificity phosphatase 6 [Source:MGI Symbol;Acc:MGI:1914853]	3.58885	7.80052e-07	0.000157924	5.06323	14.5549
ENSMUSG00000074923	Pak6	5211	p21 (RAC1) activated kinase 6 [Source:MGI Symbol;Acc:MGI:2679420]	18.3262	7.81717e-07	0.000157924	0.155216	2.34186
ENSMUSG00000038894	Irs2	6323	insulin receptor substrate 2 [Source:MGI Symbol;Acc:MGI:109334]	4.50831	8.01098e-07	0.000160041	8.61285	31.0096
ENSMUSG00000031488	Rab11fip1	10800	RAB11 family interacting protein 1 (class I) [Source:MGI Symbol;Acc:MGI:1923017]	2.32942	8.14941e-07	0.000161018	13.9308	26.3056
ENSMUSG00000047604	Frat2	2161	frequently rearranged in advanced T cell lymphomas 2 [Source:MGI Symbol;Acc:MGI:2673967]	5.18439	8.65475e-07	0.000169144	5.94618	24.8801
ENSMUSG00000109864	Eid3	1305	EP300 interacting inhibitor of differentiation 3 [Source:MGI Symbol;Acc:MGI:1913591]	7.35587	9.12012e-07	0.000176322	3.22902	19.0429
ENSMUSG00000068699	Flnc	9402	filamin C, gamma [Source:MGI Symbol;Acc:MGI:95557]	12.8462	9.73156e-07	0.000184455	16.0033	162.951
ENSMUSG00000025959	Klf7	8131	Kruppel-like factor 7 (ubiquitous) [Source:MGI Symbol;Acc:MGI:1935151]	3.13327	9.74593e-07	0.000184455	3.45587	8.80178
ENSMUSG00000021823	Vcl	8191	vinculin [Source:MGI Symbol;Acc:MGI:98927]	3.68865	1.03143e-06	0.000193179	15.9866	47.5811
ENSMUSG00000016528	Mapkapk2	3041	MAP kinase-activated protein kinase 2 [Source:MGI Symbol;Acc:MGI:109298]	2.19022	1.04885e-06	0.000194416	27.4308	48.4998
ENSMUSG00000029313	Aff1	9458	AF4/FMR2 family, member 1 [Source:MGI Symbol;Acc:MGI:1100819]	2.96137	1.07185e-06	0.000196651	22.8558	54.8598
ENSMUSG00000027940	Tpm3	6085	tropomyosin 3, gamma [Source:MGI Symbol;Acc:MGI:1890149]	3.05352	1.15391e-06	0.00020957	19.3305	47.4921
ENSMUSG00000046711	Hmga1	2125	high mobility group AT-hook 1 [Source:MGI Symbol;Acc:MGI:96160]	3.54865	1.18708e-06	0.000213436	15.9695	45.9182
ENSMUSG00000019947	Arid5b	10060	AT rich interactive domain 5B (MRF1-like) [Source:MGI Symbol;Acc:MGI:2175912]	3.89429	1.3087e-06	0.000232974	19.6888	61.4622
ENSMUSG00000105504	Gbp5	6637	guanylate binding protein 5 [Source:MGI Symbol;Acc:MGI:2429943]	13.1752	1.32627e-06	0.000233788	0.0917419	0.982829
ENSMUSG00000003541	Ier3	1131	immediate early response 3 [Source:MGI Symbol;Acc:MGI:104814]	9.93695	1.34525e-06	0.000234832	3.45065	28.1713
ENSMUSG00000061132	Blnk	5991	B cell linker [Source:MGI Symbol;Acc:MGI:96878]	6.54638	1.4083e-06	0.000242248	0.523511	2.77352
ENSMUSG00000069833	Ahnak	19938	AHNAK nucleoprotein (desmoyokin) [Source:MGI Symbol;Acc:MGI:1316648]	3.7324	1.44664e-06	0.000242248	98.2683	294.93
ENSMUSG00000021360	Gcnt2	7051	glucosaminyl (N-acetyl) transferase 2, I-branching enzyme [Source:MGI Symbol;Acc:MGI:1100870]	11.4494	1.46292e-06	0.000242248	1.08864	10.006
ENSMUSG00000056501	Cebpb	1504	CCAAT/enhancer binding protein (C/EBP), beta [Source:MGI Symbol;Acc:MGI:88373]	3.39325	1.46596e-06	0.000242248	30.831	84.0779
ENSMUSG00000028613	Lrp8	12689	low density lipoprotein receptor-related protein 8, apolipoprotein e receptor [Source:MGI Symbol;Acc:MGI:1340044]	3.28047	1.46942e-06	0.000242248	2.01482	5.29846
ENSMUSG00000004040	Stat3	9527	signal transducer and activator of transcription 3 [Source:MGI Symbol;Acc:MGI:103038]	2.38788	1.47451e-06	0.000242248	13.5157	25.9258
ENSMUSG00000047281	Sfn	1613	stratifin [Source:MGI Symbol;Acc:MGI:1891831]	4.83797	1.48205e-06	0.000242248	5.07325	19.9233
ENSMUSG00000046731	Kctd11	3146	potassium channel tetramerisation domain containing 11 [Source:MGI Symbol;Acc:MGI:2448712]	6.0334	1.54249e-06	0.000248779	1.50366	7.20127
ENSMUSG00000032846	Zswim6	5550	zinc finger SWIM-type containing 6 [Source:MGI Symbol;Acc:MGI:1914513]	2.89667	1.54968e-06	0.000248779	7.49731	17.3916
ENSMUSG00000025178	Pi4k2a	6692	phosphatidylinositol 4-kinase type 2 alpha [Source:MGI Symbol;Acc:MGI:1934031]	2.65069	1.57253e-06	0.000250213	7.34568	15.5549
ENSMUSG00000044471	Lncpint	7378	long non-protein coding RNA, Trp53 induced transcript [Source:MGI Symbol;Acc:MGI:2673128]	3.98479	1.61371e-06	0.000254513	7.15929	22.7303
ENSMUSG00000048895	Cdk5r1	4162	cyclin-dependent kinase 5, regulatory subunit 1 (p35) [Source:MGI Symbol;Acc:MGI:101764]	4.76355	1.63654e-06	0.000255869	1.26735	4.88025
ENSMUSG00000005871	Apc	16116	APC, WNT signaling pathway regulator [Source:MGI Symbol;Acc:MGI:88039]	2.24853	1.65962e-06	0.000257242	15.2564	27.4936
ENSMUSG00000036390	Gadd45a	1764	growth arrest and DNA-damage-inducible 45 alpha [Source:MGI Symbol;Acc:MGI:107799]	4.23379	1.69541e-06	0.000260542	12.1652	41.393
ENSMUSG00000031538	Plat	6241	plasminogen activator, tissue [Source:MGI Symbol;Acc:MGI:97610]	4.41692	1.74014e-06	0.00026495	9.91605	35.5654
ENSMUSG00000030064	Frmd4b	14302	FERM domain containing 4B [Source:MGI Symbol;Acc:MGI:2141794]	2.6783	1.75356e-06	0.00026495	4.89444	10.4732
ENSMUSG00000034220	Gpc1	5159	glypican 1 [Source:MGI Symbol;Acc:MGI:1194891]	2.99603	1.77298e-06	0.000265652	10.5655	25.1088
ENSMUSG00000039911	Spsb1	4396	splA/ryanodine receptor domain and SOCS box containing 1 [Source:MGI Symbol;Acc:MGI:1921896]	4.02561	1.82858e-06	0.000271718	8.11475	26.123
ENSMUSG00000020275	Rel	7466	reticuloendotheliosis oncogene [Source:MGI Symbol;Acc:MGI:97897]	4.82341	2.06653e-06	0.000304559	1.4786	5.81148
ENSMUSG00000047554	Tmem41b	5872	transmembrane protein 41B [Source:MGI Symbol;Acc:MGI:1289225]	2.87944	2.14615e-06	0.000313722	2.7444	6.32346
ENSMUSG00000004043	Stat5a	7133	signal transducer and activator of transcription 5A [Source:MGI Symbol;Acc:MGI:103036]	3.67514	2.17105e-06	0.000314803	1.40599	4.20313
ENSMUSG00000021411	Pxdc1	2914	PX domain containing 1 [Source:MGI Symbol;Acc:MGI:1914145]	6.26342	2.26695e-06	0.000326078	1.59035	8.03862
ENSMUSG00000053907	Mat2a	4486	methionine adenosyltransferase II, alpha [Source:MGI Symbol;Acc:MGI:2443731]	2.34156	2.41396e-06	0.000344469	23.9974	45.0081
ENSMUSG00000048490	Nrip1	11457	nuclear receptor interacting protein 1 [Source:MGI Symbol;Acc:MGI:1315213]	2.08376	2.54309e-06	0.000359485	7.03164	11.8524
ENSMUSG00000035969	Rusc2	7923	RUN and SH3 domain containing 2 [Source:MGI Symbol;Acc:MGI:2140371]	3.07255	2.55918e-06	0.000359485	4.43113	11.0574
ENSMUSG00000056749	Nfil3	2026	nuclear factor, interleukin 3, regulated [Source:MGI Symbol;Acc:MGI:109495]	3.21537	2.59351e-06	0.000361484	15.1373	39.3439
ENSMUSG00000021701	Plk2	4491	polo like kinase 2 [Source:MGI Symbol;Acc:MGI:1099790]	8.67854	2.66345e-06	0.000366114	6.01823	42.2988
ENSMUSG00000040661	Rad54l2	11828	RAD54 like 2 (S. cerevisiae) [Source:MGI Symbol;Acc:MGI:1933196]	2.11292	2.66746e-06	0.000366114	4.35319	7.38017
ENSMUSG00000041229	Phf8	9318	PHD finger protein 8 [Source:MGI Symbol;Acc:MGI:2444341]	2.39062	2.74512e-06	0.000373919	2.48296	4.77328
ENSMUSG00000042677	Zc3h12a	2882	zinc finger CCCH type containing 12A [Source:MGI Symbol;Acc:MGI:2385891]	7.99998	2.92647e-06	0.000393934	0.726765	4.71912
ENSMUSG00000021408	Ripk1	8344	receptor (TNFRSF)-interacting serine-threonine kinase 1 [Source:MGI Symbol;Acc:MGI:108212]	3.33494	2.93588e-06	0.000393934	3.35968	8.93825
ENSMUSG00000024812	Tjp2	6199	tight junction protein 2 [Source:MGI Symbol;Acc:MGI:1341872]	2.18423	2.98442e-06	0.000396067	18.681	32.758
ENSMUSG00000050359	Sprr1a	806	small proline-rich protein 1A [Source:MGI Symbol;Acc:MGI:106660]	5.1175	2.99583e-06	0.000396067	1.90653	7.94098
ENSMUSG00000045761	Togaram2	5624	TOG array regulator of axonemal microtubules 2 [Source:MGI Symbol;Acc:MGI:2443498]	9.58526	3.03557e-06	0.000397337	0.306899	2.33125
ENSMUSG00000039232	Stx11	4209	syntaxin 11 [Source:MGI Symbol;Acc:MGI:1921982]	6.3885	3.04964e-06	0.000397337	5.38309	27.7732
ENSMUSG00000025234	Arih1	7707	ariadne RBR E3 ubiquitin protein ligase 1 [Source:MGI Symbol;Acc:MGI:1344363]	2.1876	3.09324e-06	0.00039751	9.50767	16.6886
ENSMUSG00000041308	Sntb2	10350	syntrophin, basic 2 [Source:MGI Symbol;Acc:MGI:101771]	3.3245	3.09518e-06	0.00039751	5.7292	15.4594
ENSMUSG00000028680	Plk3	2531	polo like kinase 3 [Source:MGI Symbol;Acc:MGI:109604]	13.9419	3.17008e-06	0.000404241	1.08978	12.4447
ENSMUSG00000046062	Ppp1r15b	5594	protein phosphatase 1, regulatory subunit 15B [Source:MGI Symbol;Acc:MGI:2444211]	2.31298	3.34864e-06	0.000424004	9.01161	16.8063
ENSMUSG00000041235	Chd7	13786	chromodomain helicase DNA binding protein 7 [Source:MGI Symbol;Acc:MGI:2444748]	2.08773	3.40743e-06	0.000428431	22.9672	38.4319
ENSMUSG00000020363	Gfpt2	5591	glutamine fructose-6-phosphate transaminase 2 [Source:MGI Symbol;Acc:MGI:1338883]	5.03924	3.59902e-06	0.000449378	1.57049	6.44852
ENSMUSG00000046404	Yod1	6128	YOD1 deubiquitinase [Source:MGI Symbol;Acc:MGI:2442596]	3.1998	3.82911e-06	0.00047481	3.02523	7.93926
ENSMUSG00000035498	Cdcp1	6765	CUB domain containing protein 1 [Source:MGI Symbol;Acc:MGI:2442010]	45.07	3.91108e-06	0.000481653	0.0156854	0.613217
ENSMUSG00000025340	Rabgef1	4168	RAB guanine nucleotide exchange factor (GEF) 1 [Source:MGI Symbol;Acc:MGI:1929459]	2.91462	4.08488e-06	0.000499634	6.87711	16.1435
ENSMUSG00000052512	Nav2	32228	neuron navigator 2 [Source:MGI Symbol;Acc:MGI:2183691]	2.85856	4.18435e-06	0.000508342	3.05622	6.95682
ENSMUSG00000027947	Il6ra	8642	interleukin 6 receptor, alpha [Source:MGI Symbol;Acc:MGI:105304]	7.89543	4.36928e-06	0.000527246	0.192297	1.23824
ENSMUSG00000020607	Lratd1	4308	LRAT domain containing 1 [Source:MGI Symbol;Acc:MGI:2145011]	4.11377	4.40379e-06	0.000527867	0.331989	1.11267
ENSMUSG00000040033	Stat2	5926	signal transducer and activator of transcription 2 [Source:MGI Symbol;Acc:MGI:103039]	3.26972	4.46917e-06	0.000531613	2.53237	6.57459
ENSMUSG00000026020	Nop58	10758	NOP58 ribonucleoprotein [Source:MGI Symbol;Acc:MGI:1933184]	2.5262	4.49417e-06	0.000531613	4.1469	8.44247
ENSMUSG00000038564	Ift172	6617	intraflagellar transport 172 [Source:MGI Symbol;Acc:MGI:2682064]	2.30858	4.67031e-06	0.000548838	7.25962	13.4512
ENSMUSG00000002489	Tiam1	10048	T cell lymphoma invasion and metastasis 1 [Source:MGI Symbol;Acc:MGI:103306]	3.1173	4.9416e-06	0.000576064	2.68156	6.61589
ENSMUSG00000087006	Gm13889	1392	predicted gene 13889 [Source:MGI Symbol;Acc:MGI:3652053]	9.20884	4.96606e-06	0.000576064	2.76428	21.2639
ENSMUSG00000039770	Ypel5	4185	yippee like 5 [Source:MGI Symbol;Acc:MGI:1916937]	2.10916	5.04123e-06	0.000581034	11.2697	19.2318
ENSMUSG00000034936	Arl4d	1382	ADP-ribosylation factor-like 4D [Source:MGI Symbol;Acc:MGI:1933155]	6.72392	5.2079e-06	0.000595232	12.4995	68.0971
ENSMUSG00000026796	Fam129b	4672	family with sequence similarity 129, member B [Source:MGI Symbol;Acc:MGI:2442910]	2.07555	5.23062e-06	0.000595232	23.9178	40.0131
ENSMUSG00000019854	Reps1	5564	RalBP1 associated Eps domain containing protein [Source:MGI Symbol;Acc:MGI:1196373]	2.94194	5.34265e-06	0.000604157	4.64365	11.0268
ENSMUSG00000018143	Mafk	3901	v-maf musculoaponeurotic fibrosarcoma oncogene family, protein K (avian) [Source:MGI Symbol;Acc:MGI:99951]	2.90254	5.38562e-06	0.000605209	7.14638	16.6686
ENSMUSG00000032802	Srxn1	2820	sulfiredoxin 1 homolog (S. cerevisiae) [Source:MGI Symbol;Acc:MGI:104971]	11.6027	5.44018e-06	0.000607543	19.785	186.01
ENSMUSG00000025582	Nptx1	5217	neuronal pentraxin 1 [Source:MGI Symbol;Acc:MGI:107811]	5.5769	5.55556e-06	0.000616598	1.1168	4.97112
ENSMUSG00000106149	Gm43430	3897	predicted gene 43430 [Source:MGI Symbol;Acc:MGI:5663567]	5.49099	5.87623e-06	0.000648188	0.614221	2.7529
ENSMUSG00000038587	Akap12	6461	A kinase (PRKA) anchor protein (gravin) 12 [Source:MGI Symbol;Acc:MGI:1932576]	10.4664	5.95822e-06	0.000653224	7.34944	62.3057
ENSMUSG00000034832	Tet3	16695	tet methylcytosine dioxygenase 3 [Source:MGI Symbol;Acc:MGI:2446229]	2.32598	6.18723e-06	0.000673189	13.0539	24.2876
ENSMUSG00000035274	Tpbg	3828	trophoblast glycoprotein [Source:MGI Symbol;Acc:MGI:1341264]	5.07724	6.2152e-06	0.000673189	2.86781	11.7443
ENSMUSG00000029171	Pgm2	2590	phosphoglucomutase 2 [Source:MGI Symbol;Acc:MGI:97564]	2.44515	6.81932e-06	0.000731949	6.71714	13.2527
ENSMUSG00000090946	Ccdc71l	4240	coiled-coil domain containing 71 like [Source:MGI Symbol;Acc:MGI:1919373]	2.96171	6.83912e-06	0.000731949	4.25526	10.214
ENSMUSG00000051495	Irf2bp2	5080	interferon regulatory factor 2 binding protein 2 [Source:MGI Symbol;Acc:MGI:2443921]	1.96032	6.97821e-06	0.000739336	28.2817	44.8985
ENSMUSG00000028195	Ccn1	2019	cellular communication network factor 1 [Source:MGI Symbol;Acc:MGI:88613]	9.79227	6.99038e-06	0.000739336	49.5944	393.253
ENSMUSG00000038650	Rnh1	2594	ribonuclease/angiogenin inhibitor 1 [Source:MGI Symbol;Acc:MGI:1195456]	2.48861	7.25477e-06	0.000762811	8.79677	17.653
ENSMUSG00000040511	Pvr	6122	poliovirus receptor [Source:MGI Symbol;Acc:MGI:107741]	6.29595	7.4004e-06	0.000769911	1.253	6.30916
ENSMUSG00000027459	Fam110a	2207	family with sequence similarity 110, member A [Source:MGI Symbol;Acc:MGI:1921097]	5.30931	7.40793e-06	0.000769911	1.44707	6.38657
ENSMUSG00000030790	Adm	1619	adrenomedullin [Source:MGI Symbol;Acc:MGI:108058]	9.68103	7.48778e-06	0.000773737	2.49885	19.9374
ENSMUSG00000046186	Cd109	6900	CD109 antigen [Source:MGI Symbol;Acc:MGI:2445221]	7.70211	7.61732e-06	0.000780681	0.42529	2.67583
ENSMUSG00000004056	Akt2	7131	thymoma viral proto-oncogene 2 [Source:MGI Symbol;Acc:MGI:104874]	1.97116	7.64181e-06	0.000780681	6.37232	10.1073
ENSMUSG00000054720	Lrrc8c	7654	leucine rich repeat containing 8 family, member C [Source:MGI Symbol;Acc:MGI:2140839]	6.04981	7.90734e-06	0.000803243	0.245767	1.20643
ENSMUSG00000030522	Mtmr10	7873	myotubularin related protein 10 [Source:MGI Symbol;Acc:MGI:2142292]	2.69825	8.15256e-06	0.0008235	9.20216	19.8615
ENSMUSG00000001995	Sipa1l2	9617	signal-induced proliferation-associated 1 like 2 [Source:MGI Symbol;Acc:MGI:2676970]	1.9219	8.23843e-06	0.000827525	6.04565	9.33311
ENSMUSG00000032776	Mctp2	12351	multiple C2 domains, transmembrane 2 [Source:MGI Symbol;Acc:MGI:2685335]	7.35045	8.51599e-06	0.000850653	0.130991	0.771301
ENSMUSG00000020611	Gna13	6421	guanine nucleotide binding protein, alpha 13 [Source:MGI Symbol;Acc:MGI:95768]	2.11169	8.61204e-06	0.000854083	15.9206	27.1302
ENSMUSG00000028530	Jak1	7227	Janus kinase 1 [Source:MGI Symbol;Acc:MGI:96628]	2.03178	8.64534e-06	0.000854083	18.8098	30.7607
ENSMUSG00000020181	Nav3	16536	neuron navigator 3 [Source:MGI Symbol;Acc:MGI:2183703]	3.63546	8.75283e-06	0.000859978	0.652788	1.89671
ENSMUSG00000019966	Kitl	5911	kit ligand [Source:MGI Symbol;Acc:MGI:96974]	6.59258	9.33939e-06	0.00091262	0.390949	2.04567
ENSMUSG00000103899	Gm37940	3251	predicted gene, 37940 [Source:MGI Symbol;Acc:MGI:5611168]	6.19762	9.44316e-06	0.000915604	0.441323	2.19788
ENSMUSG00000051391	Ywhag	5500	tyrosine 3-monooxygenase/tryptophan 5-monooxygenase activation protein, gamma polypeptide [Source:MGI Symbol;Acc:MGI:108109]	2.17813	9.47177e-06	0.000915604	38.477	67.6671
ENSMUSG00000026317	Cln8	7606	ceroid-lipofuscinosis, neuronal 8 [Source:MGI Symbol;Acc:MGI:1349447]	2.52846	9.69716e-06	0.000932379	3.4359	7.05395
ENSMUSG00000036057	Ptpn23	5619	protein tyrosine phosphatase, non-receptor type 23 [Source:MGI Symbol;Acc:MGI:2144837]	2.21054	1.01397e-05	0.000967249	15.0802	26.7004
ENSMUSG00000033902	Mapkbp1	7602	mitogen-activated protein kinase binding protein 1 [Source:MGI Symbol;Acc:MGI:1347004]	2.48473	1.01674e-05	0.000967249	3.61287	7.13718
ENSMUSG00000051022	Hs3st1	2230	heparan sulfate (glucosamine) 3-O-sulfotransferase 1 [Source:MGI Symbol;Acc:MGI:1201606]	6.44355	1.05294e-05	0.000987541	2.1306	11.111
ENSMUSG00000025145	Lrrc45	3293	leucine rich repeat containing 45 [Source:MGI Symbol;Acc:MGI:2387183]	2.60589	1.05721e-05	0.000987541	9.00786	18.7098
ENSMUSG00000097998	Gm27019	404	predicted gene, 27019 [Source:MGI Symbol;Acc:MGI:5504134]	9.34253	1.06513e-05	0.000987541	3.94475	29.5842
ENSMUSG00000045092	S1pr1	3046	sphingosine-1-phosphate receptor 1 [Source:MGI Symbol;Acc:MGI:1096355]	2.92315	1.0653e-05	0.000987541	3.60012	8.36122
ENSMUSG00000015501	Hivep2	13720	human immunodeficiency virus type I enhancer binding protein 2 [Source:MGI Symbol;Acc:MGI:1338076]	2.35767	1.06553e-05	0.000987541	3.21857	6.11893
ENSMUSG00000008384	Sertad1	1344	SERTA domain containing 1 [Source:MGI Symbol;Acc:MGI:1913438]	3.71579	1.09334e-05	0.00100811	6.53196	19.5476
ENSMUSG00000038059	Smim3	6828	small integral membrane protein 3 [Source:MGI Symbol;Acc:MGI:1917088]	3.39401	1.10253e-05	0.0010114	4.39946	12.182
ENSMUSG00000038456	Dennd2a	7229	DENN/MADD domain containing 2A [Source:MGI Symbol;Acc:MGI:2444961]	2.23193	1.12161e-05	0.00102368	6.08117	10.9196
ENSMUSG00000029381	Shroom3	13247	shroom family member 3 [Source:MGI Symbol;Acc:MGI:1351655]	2.18548	1.18011e-05	0.00107163	3.64017	6.42572
ENSMUSG00000020901	Pik3r5	5550	phosphoinositide-3-kinase regulatory subunit 5 [Source:MGI Symbol;Acc:MGI:2443588]	11.5982	1.20012e-05	0.00108433	0.0273172	0.271873
ENSMUSG00000056656	Apol8	2962	apolipoprotein L 8 [Source:MGI Symbol;Acc:MGI:2444921]	14.6101	1.23528e-05	0.00111051	0.336925	3.99446
ENSMUSG00000055148	Klf2	1847	Kruppel-like factor 2 (lung) [Source:MGI Symbol;Acc:MGI:1342772]	30.5998	1.24618e-05	0.00111474	1.1426	28.1734
ENSMUSG00000048787	Dcun1d3	7838	DCN1, defective in cullin neddylation 1, domain containing 3 (S. cerevisiae) [Source:MGI Symbol;Acc:MGI:2679003]	2.59854	1.29066e-05	0.00114337	1.76662	3.66216
ENSMUSG00000017009	Sdc4	2547	syndecan 4 [Source:MGI Symbol;Acc:MGI:1349164]	2.32484	1.2909e-05	0.00114337	155.062	289.51
ENSMUSG00000038806	Sde2	3471	SDE2 telomere maintenance homolog (S. pombe) [Source:MGI Symbol;Acc:MGI:2384788]	2.16479	1.29762e-05	0.00114369	6.33724	11.0729
ENSMUSG00000022895	Ets2	5780	E26 avian leukemia oncogene 2, 3' domain [Source:MGI Symbol;Acc:MGI:95456]	3.7459	1.31396e-05	0.00115244	5.29459	16.0399
ENSMUSG00000071604	Fam189a2	2886	family with sequence similarity 189, member A2 [Source:MGI Symbol;Acc:MGI:2685813]	9.06937	1.33973e-05	0.00116934	2.47755	17.9084
ENSMUSG00000018427	Ypel2	4847	yippee like 2 [Source:MGI Symbol;Acc:MGI:1925114]	2.25907	1.40057e-05	0.00121653	12.398	22.3451
ENSMUSG00000078853	Igtp	2022	interferon gamma induced GTPase [Source:MGI Symbol;Acc:MGI:107729]	8.44996	1.41831e-05	0.00122602	1.46625	9.97438
ENSMUSG00000057561	Eif1a	4168	eukaryotic translation initiation factor 1A [Source:MGI Symbol;Acc:MGI:95298]	2.52035	1.43206e-05	0.00123199	5.64943	11.5306
ENSMUSG00000020892	Aloxe3	6397	arachidonate lipoxygenase 3 [Source:MGI Symbol;Acc:MGI:1345140]	17.0463	1.44293e-05	0.00123204	0.0928489	1.26511
ENSMUSG00000027936	Crtc2	4094	CREB regulated transcription coactivator 2 [Source:MGI Symbol;Acc:MGI:1921593]	2.25907	1.44583e-05	0.00123204	4.47311	8.11352
ENSMUSG00000022305	Lrp12	4588	low density lipoprotein-related protein 12 [Source:MGI Symbol;Acc:MGI:2443132]	2.0243	1.46709e-05	0.00124426	8.47176	13.8051
ENSMUSG00000035673	Sbno2	10715	strawberry notch 2 [Source:MGI Symbol;Acc:MGI:2448490]	10.2291	1.49093e-05	0.00125854	8.5232	69.374
ENSMUSG00000034663	Bmp2k	8480	BMP2 inducible kinase [Source:MGI Symbol;Acc:MGI:2155456]	2.17186	1.5112e-05	0.00126969	6.4112	11.1646
ENSMUSG00000032193	Ldlr	9622	low density lipoprotein receptor [Source:MGI Symbol;Acc:MGI:96765]	3.84018	1.52156e-05	0.00127245	6.12469	18.6236
ENSMUSG00000057315	Arhgap24	8792	Rho GTPase activating protein 24 [Source:MGI Symbol;Acc:MGI:1922647]	-1.9344	1.56792e-05	0.0013044	18.7292	7.82805
ENSMUSG00000021458	Aopep	11294	aminopeptidase O [Source:MGI Symbol;Acc:MGI:1919311]	2.8869	1.57526e-05	0.0013044	3.01202	6.8927
ENSMUSG00000026749	Nek6	10714	NIMA (never in mitosis gene a)-related expressed kinase 6 [Source:MGI Symbol;Acc:MGI:1891638]	2.32453	1.58152e-05	0.0013044	2.85286	5.33709
ENSMUSG00000037411	Serpine1	3876	serine (or cysteine) peptidase inhibitor, clade E, member 1 [Source:MGI Symbol;Acc:MGI:97608]	24.0768	1.6347e-05	0.00134209	7.77735	155.016
ENSMUSG00000033854	Kcnk10	8774	potassium channel, subfamily K, member 10 [Source:MGI Symbol;Acc:MGI:1919508]	35.3466	1.67426e-05	0.00136628	0.0472919	1.36178
ENSMUSG00000023905	Tnfrsf12a	1932	tumor necrosis factor receptor superfamily, member 12a [Source:MGI Symbol;Acc:MGI:1351484]	4.03697	1.67935e-05	0.00136628	13.4031	43.5578
ENSMUSG00000047648	Fbxo30	5197	F-box protein 30 [Source:MGI Symbol;Acc:MGI:1919115]	2.02204	1.71974e-05	0.00139063	6.98341	11.3573
ENSMUSG00000025225	Nfkb2	4584	nuclear factor of kappa light polypeptide gene enhancer in B cells 2, p49/p100 [Source:MGI Symbol;Acc:MGI:1099800]	4.4236	1.72475e-05	0.00139063	4.94189	17.5146
ENSMUSG00000070462	Tlnrd1	4433	talin rod domain containing 1 [Source:MGI Symbol;Acc:MGI:1891420]	3.07482	1.73812e-05	0.00139515	3.31152	8.18031
ENSMUSG00000024772	Ehd1	3705	EH-domain containing 1 [Source:MGI Symbol;Acc:MGI:1341878]	2.26553	1.75851e-05	0.00140525	18.3989	33.7712
ENSMUSG00000046230	Vps13a	17801	vacuolar protein sorting 13A [Source:MGI Symbol;Acc:MGI:2444304]	2.13441	1.76708e-05	0.00140585	3.90781	6.7139
ENSMUSG00000034394	Lif	4350	leukemia inhibitory factor [Source:MGI Symbol;Acc:MGI:96787]	26.3951	1.78552e-05	0.00141426	1.50147	33.0991
ENSMUSG00000014444	Piezo1	9935	piezo-type mechanosensitive ion channel component 1 [Source:MGI Symbol;Acc:MGI:3603204]	2.01862	1.80431e-05	0.00142287	21.4399	34.6459
ENSMUSG00000025060	Slk	8356	STE20-like kinase [Source:MGI Symbol;Acc:MGI:103241]	1.93364	1.83161e-05	0.00143809	12.724	19.6735
ENSMUSG00000018900	Slc22a5	3071	solute carrier family 22 (organic cation transporter), member 5 [Source:MGI Symbol;Acc:MGI:1329012]	2.37709	1.86424e-05	0.00145735	4.75077	9.03569
ENSMUSG00000042377	Fam83g	6659	family with sequence similarity 83, member G [Source:MGI Symbol;Acc:MGI:1916890]	12.5953	1.94091e-05	0.00151072	0.800711	8.26163
ENSMUSG00000019558	Slc6a8	5210	solute carrier family 6 (neurotransmitter transporter, creatine), member 8 [Source:MGI Symbol;Acc:MGI:2147834]	3.38454	1.99263e-05	0.00154429	2.252	6.23718
ENSMUSG00000001794	Capns1	2477	calpain, small subunit 1 [Source:MGI Symbol;Acc:MGI:88266]	1.79793	2.01266e-05	0.00155311	32.137	46.8168
ENSMUSG00000097282	5031415H12Rik	2481	RIKEN cDNA 5031415H12 gene [Source:MGI Symbol;Acc:MGI:1923234]	7.09431	2.03262e-05	0.00155543	0.401094	2.32707
ENSMUSG00000028793	Rnf19b	2872	ring finger protein 19B [Source:MGI Symbol;Acc:MGI:1922484]	3.69021	2.03297e-05	0.00155543	19.8073	58.9619
ENSMUSG00000022757	Tfg	2292	Trk-fused gene [Source:MGI Symbol;Acc:MGI:1338041]	1.92512	2.06755e-05	0.0015752	18.55	28.8032
ENSMUSG00000037999	Arap2	12451	ArfGAP with RhoGAP domain, ankyrin repeat and PH domain 2 [Source:MGI Symbol;Acc:MGI:2684416]	2.20473	2.08935e-05	0.00158509	2.85414	5.01881
ENSMUSG00000061175	Fnip2	8364	folliculin interacting protein 2 [Source:MGI Symbol;Acc:MGI:2683054]	2.49541	2.11217e-05	0.00159567	3.94859	7.98131
ENSMUSG00000037553	Zdhhc18	5382	zinc finger, DHHC domain containing 18 [Source:MGI Symbol;Acc:MGI:3527792]	3.34795	2.15059e-05	0.00159808	4.63716	12.373
ENSMUSG00000023087	Noct	10658	nocturnin [Source:MGI Symbol;Acc:MGI:109382]	7.35722	2.1538e-05	0.00159808	3.77241	22.624
ENSMUSG00000044707	Ccnjl	2781	cyclin J-like [Source:MGI Symbol;Acc:MGI:2685723]	-2.28568	2.156e-05	0.00159808	17.7023	6.23829
ENSMUSG00000104571	Gm43010	2878	predicted gene 43010 [Source:MGI Symbol;Acc:MGI:5663147]	3.54716	2.17056e-05	0.00159808	1.20088	3.43182
ENSMUSG00000044968	Napepld	3956	N-acyl phosphatidylethanolamine phospholipase D [Source:MGI Symbol;Acc:MGI:2140885]	-2.55189	2.17308e-05	0.00159808	6.10696	1.92794
ENSMUSG00000031880	Rrad	1577	Ras-related associated with diabetes [Source:MGI Symbol;Acc:MGI:1930943]	9.605	2.18057e-05	0.00159808	0.664997	5.087
ENSMUSG00000033016	Nfatc1	7469	nuclear factor of activated T cells, cytoplasmic, calcineurin dependent 1 [Source:MGI Symbol;Acc:MGI:102469]	7.32917	2.18289e-05	0.00159808	0.886	5.16536
ENSMUSG00000033107	Rnf125	1677	ring finger protein 125 [Source:MGI Symbol;Acc:MGI:1914914]	27.6542	2.18648e-05	0.00159808	0.18006	4.17445
ENSMUSG00000061815	Rufy4	2329	RUN and FYVE domain containing 4 [Source:MGI Symbol;Acc:MGI:3588214]	6.02225	2.24259e-05	0.00163246	0.463973	2.25319
ENSMUSG00000051439	Cd14	1732	CD14 antigen [Source:MGI Symbol;Acc:MGI:88318]	15.0637	2.36272e-05	0.00171151	0.623556	7.79289
ENSMUSG00000021891	Mettl6	7752	methyltransferase like 6 [Source:MGI Symbol;Acc:MGI:1914261]	2.38932	2.38378e-05	0.00171151	2.93996	5.61098
ENSMUSG00000020334	Slc22a4	2553	solute carrier family 22 (organic cation transporter), member 4 [Source:MGI Symbol;Acc:MGI:1353479]	3.83671	2.39077e-05	0.00171151	3.05516	9.50539
ENSMUSG00000029379	Cxcl3	3498	chemokine (C-X-C motif) ligand 3 [Source:MGI Symbol;Acc:MGI:3037818]	196.727	2.39539e-05	0.00171151	0	0.283937
ENSMUSG00000039239	Tgfb2	5791	transforming growth factor, beta 2 [Source:MGI Symbol;Acc:MGI:98726]	2.1188	2.39878e-05	0.00171151	91.6271	155.905
ENSMUSG00000114996	Gm48958	2964	predicted gene, 48958 [Source:MGI Symbol;Acc:MGI:6118289]	4.84562	2.41536e-05	0.00171653	2.39848	9.29547
ENSMUSG00000021453	Gadd45g	1173	growth arrest and DNA-damage-inducible 45 gamma [Source:MGI Symbol;Acc:MGI:1346325]	7.32018	2.48305e-05	0.00175769	25.7731	149.082
ENSMUSG00000039985	Sinhcaf	4138	SIN3-HDAC complex associated factor [Source:MGI Symbol;Acc:MGI:1929091]	-2.1322	2.51196e-05	0.00176736	13.5046	5.13313
ENSMUSG00000023067	Cdkn1a	3553	cyclin-dependent kinase inhibitor 1A (P21) [Source:MGI Symbol;Acc:MGI:104556]	5.92366	2.51637e-05	0.00176736	1.65734	7.97139
ENSMUSG00000029528	Pxn	8777	paxillin [Source:MGI Symbol;Acc:MGI:108295]	1.9118	2.557e-05	0.00178891	10.3992	15.949
ENSMUSG00000003762	Coq8b	5586	coenzyme Q8B [Source:MGI Symbol;Acc:MGI:1924139]	3.21734	2.57423e-05	0.00179398	1.40171	3.64348
ENSMUSG00000059991	Nptx2	2536	neuronal pentraxin 2 [Source:MGI Symbol;Acc:MGI:1858209]	7.39	2.68397e-05	0.00186324	0.830727	4.97257
ENSMUSG00000047407	Tgif1	5625	TGFB-induced factor homeobox 1 [Source:MGI Symbol;Acc:MGI:1194497]	2.81184	2.71639e-05	0.00187692	9.22306	20.7967
ENSMUSG00000024990	Rbp4	1343	retinol binding protein 4, plasma [Source:MGI Symbol;Acc:MGI:97879]	16.6961	2.7277e-05	0.00187692	0.190433	2.62003
ENSMUSG00000021508	Cxcl14	1827	chemokine (C-X-C motif) ligand 14 [Source:MGI Symbol;Acc:MGI:1888514]	2.40704	2.73499e-05	0.00187692	22.5162	43.1511
ENSMUSG00000030166	Rad52	5752	RAD52 homolog, DNA repair protein [Source:MGI Symbol;Acc:MGI:101949]	10.9769	2.76172e-05	0.00187975	1.28394	10.9833
ENSMUSG00000075012	Fjx1	3134	four jointed box 1 [Source:MGI Symbol;Acc:MGI:1341907]	2.54794	2.76571e-05	0.00187975	4.80545	10.0154
ENSMUSG00000024042	Sik1	5133	salt inducible kinase 1 [Source:MGI Symbol;Acc:MGI:104754]	3.0953	2.78397e-05	0.00187975	12.3411	30.9423
ENSMUSG00000020823	Sec14l1	7176	SEC14-like lipid binding 1 [Source:MGI Symbol;Acc:MGI:1921386]	-1.72737	2.78932e-05	0.00187975	42.5071	19.8487
ENSMUSG00000037465	Klf10	4179	Kruppel-like factor 10 [Source:MGI Symbol;Acc:MGI:1101353]	3.16622	2.79139e-05	0.00187975	4.5818	11.8066
ENSMUSG00000054855	Rnd1	2967	Rho family GTPase 1 [Source:MGI Symbol;Acc:MGI:2444878]	12.1666	2.81992e-05	0.00188622	1.52504	15.0957
ENSMUSG00000005103	Wdr1	8899	WD repeat domain 1 [Source:MGI Symbol;Acc:MGI:1337100]	2.4283	2.82198e-05	0.00188622	23.9311	46.6162
ENSMUSG00000022637	Cblb	10475	Casitas B-lineage lymphoma b [Source:MGI Symbol;Acc:MGI:2146430]	2.31534	2.84903e-05	0.00189416	2.8258	5.25014
ENSMUSG00000001053	N4bp3	2728	NEDD4 binding protein 3 [Source:MGI Symbol;Acc:MGI:2442218]	4.1369	2.85494e-05	0.00189416	1.03698	3.48062
ENSMUSG00000026923	Notch1	14232	notch 1 [Source:MGI Symbol;Acc:MGI:97363]	2.41167	2.90653e-05	0.00192015	8.74805	16.8018
ENSMUSG00000022744	Cldnd1	2563	claudin domain containing 1 [Source:MGI Symbol;Acc:MGI:2447860]	2.23971	2.91547e-05	0.00192015	7.50337	13.4764
ENSMUSG00000027894	Slc6a17	10283	solute carrier family 6 (neurotransmitter transporter), member 17 [Source:MGI Symbol;Acc:MGI:2442535]	2.54597	2.95459e-05	0.00193881	5.49142	11.2617
ENSMUSG00000024789	Jak2	5030	Janus kinase 2 [Source:MGI Symbol;Acc:MGI:96629]	1.82996	3.09448e-05	0.00202323	7.17023	10.5709
ENSMUSG00000034765	Dusp5	2473	dual specificity phosphatase 5 [Source:MGI Symbol;Acc:MGI:2685183]	8.67547	3.12271e-05	0.00203165	22.8116	161.272
ENSMUSG00000021752	Kctd6	3257	potassium channel tetramerisation domain containing 6 [Source:MGI Symbol;Acc:MGI:1918643]	-2.27852	3.13151e-05	0.00203165	9.22378	3.26174
ENSMUSG00000026353	Ubxn4	4659	UBX domain protein 4 [Source:MGI Symbol;Acc:MGI:1915062]	1.7193	3.14931e-05	0.00203165	17.6432	24.4064
ENSMUSG00000026305	Lrrfip1	6469	leucine rich repeat (in FLII) interacting protein 1 [Source:MGI Symbol;Acc:MGI:1342770]	3.22353	3.15255e-05	0.00203165	14.2361	36.4779
ENSMUSG00000061878	Sphk1	4774	sphingosine kinase 1 [Source:MGI Symbol;Acc:MGI:1316649]	10.6175	3.19401e-05	0.00205101	0.885353	7.62266
ENSMUSG00000030847	Bag3	2562	BCL2-associated athanogene 3 [Source:MGI Symbol;Acc:MGI:1352493]	3.19888	3.22777e-05	0.00206531	29.4334	76.3508
ENSMUSG00000019487	Trip10	3180	thyroid hormone receptor interactor 10 [Source:MGI Symbol;Acc:MGI:2146901]	2.03703	3.26132e-05	0.00207938	9.01816	14.8604
ENSMUSG00000099931	Gm29358	3265	predicted gene 29358 [Source:MGI Symbol;Acc:MGI:5580064]	3.60267	3.27328e-05	0.00207963	1.88926	5.49789
ENSMUSG00000053641	Dennd4a	16643	DENN/MADD domain containing 4A [Source:MGI Symbol;Acc:MGI:2142979]	1.88714	3.35257e-05	0.00212251	4.7483	7.16237
ENSMUSG00000022855	Senp2	6901	SUMO/sentrin specific peptidase 2 [Source:MGI Symbol;Acc:MGI:1923076]	1.99559	3.39909e-05	0.00214441	12.9054	20.576
ENSMUSG00000020644	Id2	2438	inhibitor of DNA binding 2 [Source:MGI Symbol;Acc:MGI:96397]	2.23658	3.41679e-05	0.00214804	19.8964	35.8175
ENSMUSG00000021400	Wrnip1	4378	Werner helicase interacting protein 1 [Source:MGI Symbol;Acc:MGI:1926153]	2.03572	3.62648e-05	0.00227192	6.76114	11.0082
ENSMUSG00000109051	Gm44913	2990	predicted gene 44913 [Source:MGI Symbol;Acc:MGI:5753489]	13.895	3.66036e-05	0.00228518	0.334146	3.76313
ENSMUSG00000024235	Map3k8	4504	mitogen-activated protein kinase kinase kinase 8 [Source:MGI Symbol;Acc:MGI:1346878]	3.29274	3.70247e-05	0.00230347	2.67879	7.15655
ENSMUSG00000117284	Gm7072	3474	predicted gene 7072 [Source:MGI Symbol;Acc:MGI:3648314]	-3.24635	3.80376e-05	0.00235833	3.73951	0.925766
ENSMUSG00000105265	Sox2ot	11594	SOX2 overlapping transcript (non-protein coding) [Source:MGI Symbol;Acc:MGI:2444112]	-2.65189	3.84806e-05	0.0023776	18.7807	5.78975
ENSMUSG00000002968	Med25	7629	mediator complex subunit 25 [Source:MGI Symbol;Acc:MGI:1922863]	1.77935	3.91232e-05	0.00239849	8.42144	12.0513
ENSMUSG00000032244	Fem1b	6785	feminization 1 homolog b (C. elegans) [Source:MGI Symbol;Acc:MGI:1335087]	2.29391	3.91256e-05	0.00239849	10.9103	20.1877
ENSMUSG00000037169	Mycn	3295	v-myc avian myelocytomatosis viral related oncogene, neuroblastoma derived [Source:MGI Symbol;Acc:MGI:97357]	-2.42573	3.93223e-05	0.00239849	9.21575	3.08046
ENSMUSG00000021990	Spata13	9102	spermatogenesis associated 13 [Source:MGI Symbol;Acc:MGI:104838]	1.90576	3.93523e-05	0.00239849	6.67177	10.2326
ENSMUSG00000032508	Myd88	2576	myeloid differentiation primary response gene 88 [Source:MGI Symbol;Acc:MGI:108005]	3.5296	3.95137e-05	0.00240019	2.87141	8.18402
ENSMUSG00000049764	Zfp280b	5224	zinc finger protein 280B [Source:MGI Symbol;Acc:MGI:1927865]	-2.30769	4.03402e-05	0.00244214	3.36182	1.18248
ENSMUSG00000035557	Krt17	1551	keratin 17 [Source:MGI Symbol;Acc:MGI:96691]	25.863	4.06269e-05	0.00245125	0.116276	2.59601
ENSMUSG00000035678	Tnfsf9	1290	tumor necrosis factor (ligand) superfamily, member 9 [Source:MGI Symbol;Acc:MGI:1101058]	6.11153	4.09307e-05	0.00245554	1.42527	7.10201
ENSMUSG00000040606	Kazn	10721	kazrin, periplakin interacting protein [Source:MGI Symbol;Acc:MGI:1918779]	2.21737	4.09713e-05	0.00245554	2.56948	4.63573
ENSMUSG00000041241	Mul1	4000	mitochondrial ubiquitin ligase activator of NFKB 1 [Source:MGI Symbol;Acc:MGI:1915600]	2.16715	4.15172e-05	0.00247516	5.04709	8.8539
ENSMUSG00000048807	Slc35e4	3063	solute carrier family 35, member E4 [Source:MGI Symbol;Acc:MGI:2144150]	3.52314	4.17056e-05	0.00247516	2.41791	6.83957
ENSMUSG00000060733	Ipmk	7093	inositol polyphosphate multikinase [Source:MGI Symbol;Acc:MGI:1916968]	1.92936	4.17116e-05	0.00247516	5.58502	8.65651
ENSMUSG00000085795	Zfp703	3392	zinc finger protein 703 [Source:MGI Symbol;Acc:MGI:2662729]	2.94185	4.19735e-05	0.00248251	4.52508	10.9032
ENSMUSG00000025938	Slco5a1	13137	solute carrier organic anion transporter family, member 5A1 [Source:MGI Symbol;Acc:MGI:2443431]	2.55431	4.25683e-05	0.00250683	2.09159	4.26523
ENSMUSG00000109314	Gm44699	5083	predicted gene 44699 [Source:MGI Symbol;Acc:MGI:5753275]	4.17784	4.26889e-05	0.00250683	0.731726	2.45424
ENSMUSG00000030766	Arhgap17	9759	Rho GTPase activating protein 17 [Source:MGI Symbol;Acc:MGI:1917747]	2.38988	4.2803e-05	0.00250683	4.06376	7.73244
ENSMUSG00000060510	Zfp266	7033	zinc finger protein 266 [Source:MGI Symbol;Acc:MGI:1924769]	-1.87212	4.31485e-05	0.00251887	7.08174	3.07236
ENSMUSG00000026596	Abl2	10800	v-abl Abelson murine leukemia viral oncogene 2 (arg, Abelson-related gene) [Source:MGI Symbol;Acc:MGI:87860]	2.08973	4.3758e-05	0.00254237	6.94095	11.6522
ENSMUSG00000033581	Igf2bp2	7402	insulin-like growth factor 2 mRNA binding protein 2 [Source:MGI Symbol;Acc:MGI:1890358]	2.67206	4.3834e-05	0.00254237	3.29727	7.11827
ENSMUSG00000037112	Sik2	9539	salt inducible kinase 2 [Source:MGI Symbol;Acc:MGI:2445031]	2.05963	4.44974e-05	0.00257255	4.94318	8.12498
ENSMUSG00000032548	Slco2a1	13545	solute carrier organic anion transporter family, member 2a1 [Source:MGI Symbol;Acc:MGI:1346021]	3.4392	4.5052e-05	0.00259461	0.863239	2.40582
ENSMUSG00000002910	Arrdc2	3232	arrestin domain containing 2 [Source:MGI Symbol;Acc:MGI:1918057]	-5.96983	4.51676e-05	0.00259461	9.96794	1.35955
ENSMUSG00000052397	Ezr	3290	ezrin [Source:MGI Symbol;Acc:MGI:98931]	1.90163	4.61089e-05	0.00264025	209.892	322.595
ENSMUSG00000027859	Ngf	1469	nerve growth factor [Source:MGI Symbol;Acc:MGI:97321]	14.1662	4.65207e-05	0.00265537	4.01614	45.3915
ENSMUSG00000044337	Ackr3	3348	atypical chemokine receptor 3 [Source:MGI Symbol;Acc:MGI:109562]	3.52126	4.87608e-05	0.00277443	2.64239	7.60192
ENSMUSG00000036698	Ago2	14031	argonaute RISC catalytic subunit 2 [Source:MGI Symbol;Acc:MGI:2446632]	1.75645	4.90057e-05	0.00277957	5.65545	8.00281
ENSMUSG00000035199	Arl6ip5	1442	ADP-ribosylation factor-like 6 interacting protein 5 [Source:MGI Symbol;Acc:MGI:1929501]	2.01841	4.91754e-05	0.00278042	19.1202	30.9354
ENSMUSG00000041598	Cdc42ep4	3643	CDC42 effector protein (Rho GTPase binding) 4 [Source:MGI Symbol;Acc:MGI:1929760]	1.74672	5.00947e-05	0.00281951	13.9734	19.6279
ENSMUSG00000037211	Spry1	2906	sprouty RTK signaling antagonist 1 [Source:MGI Symbol;Acc:MGI:1345139]	2.8608	5.01803e-05	0.00281951	5.21656	11.9429
ENSMUSG00000005514	Por	4021	P450 (cytochrome) oxidoreductase [Source:MGI Symbol;Acc:MGI:97744]	1.85807	5.13375e-05	0.00287554	16.921	25.3981
ENSMUSG00000028599	Tnfrsf1b	3818	tumor necrosis factor receptor superfamily, member 1b [Source:MGI Symbol;Acc:MGI:1314883]	3.66768	5.16198e-05	0.00288237	1.89653	5.6884
ENSMUSG00000028645	Slc2a1	3506	solute carrier family 2 (facilitated glucose transporter), member 1 [Source:MGI Symbol;Acc:MGI:95755]	2.05264	5.17968e-05	0.0028833	155.069	254.091
ENSMUSG00000026821	Ralgds	6345	ral guanine nucleotide dissociation stimulator [Source:MGI Symbol;Acc:MGI:107485]	2.21862	5.24872e-05	0.00291272	9.97313	17.7352
ENSMUSG00000009418	Nav1	18814	neuron navigator 1 [Source:MGI Symbol;Acc:MGI:2183683]	2.01757	5.2705e-05	0.0029136	6.40217	10.2773
ENSMUSG00000087684	1200007C13Rik	2455	RIKEN cDNA 1200007C13 gene [Source:MGI Symbol;Acc:MGI:1921369]	6.46618	5.28446e-05	0.0029136	0.638939	3.36129
ENSMUSG00000032338	Hcn4	6118	hyperpolarization-activated, cyclic nucleotide-gated K+ 4 [Source:MGI Symbol;Acc:MGI:1298209]	17.3981	5.30348e-05	0.0029136	0.498764	7.00786
ENSMUSG00000039997	Ifi203	6706	interferon activated gene 203 [Source:MGI Symbol;Acc:MGI:96428]	25.5663	5.31513e-05	0.0029136	0.0319305	0.677193
ENSMUSG00000047443	Erfe	2815	erythroferrone [Source:MGI Symbol;Acc:MGI:3606476]	206.956	5.41424e-05	0.00295891	0	0.35997
ENSMUSG00000025229	Pitx3	1526	paired-like homeodomain transcription factor 3 [Source:MGI Symbol;Acc:MGI:1100498]	-1.82021	5.45889e-05	0.00297289	41.6508	18.5817
ENSMUSG00000032702	Kank1	6166	KN motif and ankyrin repeat domains 1 [Source:MGI Symbol;Acc:MGI:2147707]	3.57394	5.48327e-05	0.00297289	4.52765	13.2907
ENSMUSG00000052837	Junb	2301	jun B proto-oncogene [Source:MGI Symbol;Acc:MGI:96647]	9.50943	5.49188e-05	0.00297289	20.978	160.067
ENSMUSG00000059248	Sept9	7565	septin 9 [Source:MGI Symbol;Acc:MGI:1858222]	3.23285	5.50596e-05	0.00297289	4.84853	12.8476
ENSMUSG00000001473	Tubb6	2437	tubulin, beta 6 class V [Source:MGI Symbol;Acc:MGI:1915201]	3.3419	5.6385e-05	0.00303324	31.1827	84.5935
ENSMUSG00000020627	Klhl29	7041	kelch-like 29 [Source:MGI Symbol;Acc:MGI:2683857]	2.82187	5.65148e-05	0.00303324	1.73966	3.93657
ENSMUSG00000034275	Igsf9b	16686	immunoglobulin superfamily, member 9B [Source:MGI Symbol;Acc:MGI:2685354]	5.34918	5.7094e-05	0.00304824	1.00526	4.46099
ENSMUSG00000020407	Upp1	1961	uridine phosphorylase 1 [Source:MGI Symbol;Acc:MGI:1097668]	5.16168	5.71333e-05	0.00304824	0.89675	3.69024
ENSMUSG00000033364	Usp37	11081	ubiquitin specific peptidase 37 [Source:MGI Symbol;Acc:MGI:2442483]	1.9298	5.76139e-05	0.00306458	3.01609	4.68072
ENSMUSG00000061762	Tac1	3399	tachykinin 1 [Source:MGI Symbol;Acc:MGI:98474]	49.5115	5.77805e-05	0.00306458	0.0445103	1.87025
ENSMUSG00000046474	Krtap4-16	954	keratin associated protein 4-16 [Source:MGI Symbol;Acc:MGI:3651030]	427.68	5.94508e-05	0.0031439	0	2.135
ENSMUSG00000103560	Gm38070	6480	predicted gene, 38070 [Source:MGI Symbol;Acc:MGI:5611298]	17.6089	6.14296e-05	0.00323902	0.0528685	0.751439
ENSMUSG00000020917	Acly	5279	ATP citrate lyase [Source:MGI Symbol;Acc:MGI:103251]	1.84122	6.29262e-05	0.00330822	20.0946	29.8671
ENSMUSG00000028381	Ugcg	5212	UDP-glucose ceramide glucosyltransferase [Source:MGI Symbol;Acc:MGI:1332243]	2.42575	6.37688e-05	0.00334275	3.98597	7.74096
ENSMUSG00000063550	Nup98	12602	nucleoporin 98 [Source:MGI Symbol;Acc:MGI:109404]	1.88075	6.4281e-05	0.0033598	6.92475	10.4884
ENSMUSG00000051375	Pcdh1	8797	protocadherin 1 [Source:MGI Symbol;Acc:MGI:104692]	2.97708	6.46187e-05	0.00336767	0.931557	2.23239
ENSMUSG00000003032	Klf4	3049	Kruppel-like factor 4 (gut) [Source:MGI Symbol;Acc:MGI:1342287]	8.20673	6.49516e-05	0.00337523	25.0595	166.323
ENSMUSG00000026864	Hspa5	4229	heat shock protein 5 [Source:MGI Symbol;Acc:MGI:95835]	2.0748	6.53563e-05	0.00338151	56.5997	95.4378
ENSMUSG00000005069	Pex5	3943	peroxisomal biogenesis factor 5 [Source:MGI Symbol;Acc:MGI:1098808]	2.02135	6.54485e-05	0.00338151	6.07255	9.8376
ENSMUSG00000044813	Shb	3199	src homology 2 domain-containing transforming protein B [Source:MGI Symbol;Acc:MGI:98294]	2.01797	6.64503e-05	0.00342343	15.5351	25.0398
ENSMUSG00000115338	Pnp	3979	purine-nucleoside phosphorylase [Source:MGI Symbol;Acc:MGI:97365]	2.83644	6.79906e-05	0.00349277	2.01701	4.62593
ENSMUSG00000022280	Rnf19a	4434	ring finger protein 19A [Source:MGI Symbol;Acc:MGI:1353623]	2.0025	6.89614e-05	0.0035317	8.37642	13.3688
ENSMUSG00000001089	Luzp1	8112	leucine zipper protein 1 [Source:MGI Symbol;Acc:MGI:107629]	1.70976	6.91412e-05	0.0035317	10.5078	14.4878
ENSMUSG00000032280	Tle3	11653	transducin-like enhancer of split 3 [Source:MGI Symbol;Acc:MGI:104634]	2.09249	7.01214e-05	0.00357162	8.14069	13.5557
ENSMUSG00000026773	Pfkfb3	7561	6-phosphofructo-2-kinase/fructose-2,6-biphosphatase 3 [Source:MGI Symbol;Acc:MGI:2181202]	3.08164	7.08817e-05	0.00360015	9.27589	22.684
ENSMUSG00000018774	Cd68	1257	CD68 antigen [Source:MGI Symbol;Acc:MGI:88342]	5.82732	7.15269e-05	0.00362269	0.90391	4.26619
ENSMUSG00000022602	Arc	3057	activity regulated cytoskeletal-associated protein [Source:MGI Symbol;Acc:MGI:88067]	39.9429	7.213e-05	0.00364297	5.63879	183.823
ENSMUSG00000030386	Zfp606	7680	zinc finger protein 606 [Source:MGI Symbol;Acc:MGI:1914620]	-2.10547	7.26805e-05	0.00366049	4.05237	1.56299
ENSMUSG00000007617	Homer1	11976	homer scaffolding protein 1 [Source:MGI Symbol;Acc:MGI:1347345]	3.42074	7.43721e-05	0.00373522	1.22311	3.37903
ENSMUSG00000115275	9630050E16Rik	7441	RIKEN cDNA 9630050E16 gene [Source:MGI Symbol;Acc:MGI:2443518]	4.45908	7.49497e-05	0.00375375	0.453884	1.62563
ENSMUSG00000088185	Scarna2	414	small Cajal body-specific RNA 2 [Source:MGI Symbol;Acc:MGI:3819484]	2.03288	7.62038e-05	0.00380144	91.9085	149.136
ENSMUSG00000034135	Sik3	9318	SIK family kinase 3 [Source:MGI Symbol;Acc:MGI:2446296]	1.79444	7.65576e-05	0.00380144	9.74294	14.0627
ENSMUSG00000028128	F3	2527	coagulation factor III [Source:MGI Symbol;Acc:MGI:88381]	27.0074	7.66677e-05	0.00380144	1.97454	43.9066
ENSMUSG00000053626	Tll1	7758	tolloid-like [Source:MGI Symbol;Acc:MGI:106923]	2.38155	7.67476e-05	0.00380144	0.518893	0.996838
ENSMUSG00000020250	Txnrd1	7086	thioredoxin reductase 1 [Source:MGI Symbol;Acc:MGI:1354175]	3.77484	7.72941e-05	0.00381633	15.6074	47.9724
ENSMUSG00000053819	Camk2d	22493	calcium/calmodulin-dependent protein kinase II, delta [Source:MGI Symbol;Acc:MGI:1341265]	1.76857	7.74728e-05	0.00381633	3.71306	5.31288
ENSMUSG00000024270	Slc39a6	4073	solute carrier family 39 (metal ion transporter), member 6 [Source:MGI Symbol;Acc:MGI:2147279]	1.93597	7.80709e-05	0.00383529	10.1769	15.745
ENSMUSG00000025192	Entpd7	8963	ectonucleoside triphosphate diphosphohydrolase 7 [Source:MGI Symbol;Acc:MGI:2135885]	1.96788	7.88362e-05	0.00386233	2.07046	3.28971
ENSMUSG00000031665	Sall1	5265	spalt like transcription factor 1 [Source:MGI Symbol;Acc:MGI:1889585]	-1.87836	7.90715e-05	0.00386333	13.5985	5.83794
ENSMUSG00000021814	Anxa7	5991	annexin A7 [Source:MGI Symbol;Acc:MGI:88031]	1.83907	8.19387e-05	0.00398383	6.44893	9.49213
ENSMUSG00000024750	Zfand5	10751	zinc finger, AN1-type domain 5 [Source:MGI Symbol;Acc:MGI:1278334]	2.06454	8.19809e-05	0.00398383	8.78715	14.8259
ENSMUSG00000036737	Oxsr1	5350	oxidative-stress responsive 1 [Source:MGI Symbol;Acc:MGI:1917378]	1.98902	8.26159e-05	0.00400386	6.11484	9.69579
ENSMUSG00000028636	Ppcs	1605	phosphopantothenoylcysteine synthetase [Source:MGI Symbol;Acc:MGI:1915237]	-5.49308	8.48229e-05	0.00409682	2.69012	0.396484
ENSMUSG00000051985	Igfn1	8996	immunoglobulin-like and fibronectin type III domain containing 1 [Source:MGI Symbol;Acc:MGI:3045352]	2.47801	8.50764e-05	0.00409682	2.67371	5.34447
ENSMUSG00000024539	Ptpn2	3125	protein tyrosine phosphatase, non-receptor type 2 [Source:MGI Symbol;Acc:MGI:97806]	2.61788	8.54024e-05	0.00409682	6.44619	13.5966
ENSMUSG00000043557	Mdga1	9515	MAM domain containing glycosylphosphatidylinositol anchor 1 [Source:MGI Symbol;Acc:MGI:1922012]	3.33615	8.54454e-05	0.00409682	1.13233	2.99109
ENSMUSG00000020515	Cnot8	2636	CCR4-NOT transcription complex, subunit 8 [Source:MGI Symbol;Acc:MGI:1916375]	-2.26822	8.6073e-05	0.00411594	12.9895	4.68863
ENSMUSG00000072620	Slfn2	1664	schlafen 2 [Source:MGI Symbol;Acc:MGI:1313258]	8.96031	8.87481e-05	0.0042153	0.469334	3.41275
ENSMUSG00000041313	Slc7a1	11530	solute carrier family 7 (cationic amino acid transporter, y+ system), member 1 [Source:MGI Symbol;Acc:MGI:88117]	2.06088	8.88005e-05	0.0042153	3.31261	5.4577
ENSMUSG00000054203	Ifi205	4177	interferon activated gene 205 [Source:MGI Symbol;Acc:MGI:101847]	34.9393	8.88542e-05	0.0042153	0.0108705	0.357931
ENSMUSG00000004044	Cavin1	3587	caveolae associated 1 [Source:MGI Symbol;Acc:MGI:1277968]	1.79065	8.97536e-05	0.00424676	58.7395	84.7564
ENSMUSG00000028518	Prkaa2	7969	protein kinase, AMP-activated, alpha 2 catalytic subunit [Source:MGI Symbol;Acc:MGI:1336173]	-1.93095	9.31808e-05	0.00438644	4.93745	2.04321
ENSMUSG00000016524	Il19	1149	interleukin 19 [Source:MGI Symbol;Acc:MGI:1890472]	753.969	9.31935e-05	0.00438644	0	3.37641
ENSMUSG00000052942	Glis3	8842	GLIS family zinc finger 3 [Source:MGI Symbol;Acc:MGI:2444289]	2.84381	9.35162e-05	0.00439013	1.29292	2.98055
ENSMUSG00000031278	Acsl4	5405	acyl-CoA synthetase long-chain family member 4 [Source:MGI Symbol;Acc:MGI:1354713]	2.06898	9.38323e-05	0.0043935	3.39657	5.61781
ENSMUSG00000092035	Peg10	6667	paternally expressed 10 [Source:MGI Symbol;Acc:MGI:2157785]	3.0623	9.56086e-05	0.00446504	1.96222	4.77847
ENSMUSG00000040711	Sh3pxd2b	9793	SH3 and PX domains 2B [Source:MGI Symbol;Acc:MGI:2442062]	1.89068	9.61966e-05	0.00448087	4.05233	6.12105
ENSMUSG00000070639	Lrrc8b	6726	leucine rich repeat containing 8 family, member B [Source:MGI Symbol;Acc:MGI:2141353]	2.15074	9.82737e-05	0.00456064	2.82985	4.93091
ENSMUSG00000042379	Esm1	2097	endothelial cell-specific molecule 1 [Source:MGI Symbol;Acc:MGI:1918940]	96.8986	9.84165e-05	0.00456064	0.160408	12.5229
ENSMUSG00000044748	Defb1	872	defensin beta 1 [Source:MGI Symbol;Acc:MGI:1096878]	14.2018	9.8916e-05	0.004572	0.225895	2.70154
ENSMUSG00000039568	Ubald1	5538	UBA-like domain containing 1 [Source:MGI Symbol;Acc:MGI:1916255]	2.09791	9.95532e-05	0.00458266	3.49504	5.91048
ENSMUSG00000056383	AI987944	4009	expressed sequence AI987944 [Source:MGI Symbol;Acc:MGI:2142079]	-2.54012	9.98143e-05	0.00458266	2.82231	0.891685
ENSMUSG00000025612	Bach1	6179	BTB and CNC homology 1, basic leucine zipper transcription factor 1 [Source:MGI Symbol;Acc:MGI:894680]	2.57884	0.000100007	0.00458266	6.16357	12.7945
ENSMUSG00000039960	Rhou	3806	ras homolog family member U [Source:MGI Symbol;Acc:MGI:1916831]	-2.13577	0.000100166	0.00458266	12.1739	4.66521
ENSMUSG00000039431	Mtmr7	4454	myotubularin related protein 7 [Source:MGI Symbol;Acc:MGI:1891693]	-1.93317	0.00010135	0.00461409	10.3443	4.29458
ENSMUSG00000050271	Prag1	9606	PEAK1 related kinase activating pseudokinase 1 [Source:MGI Symbol;Acc:MGI:1196223]	2.46573	0.000101366	0.00461409	2.65006	5.25436
ENSMUSG00000067219	Nipal1	4393	NIPA-like domain containing 1 [Source:MGI Symbol;Acc:MGI:1917951]	7.16409	0.000102193	0.00463495	0.762308	4.36481
ENSMUSG00000093042	Mir3109	88	microRNA 3109 [Source:MGI Symbol;Acc:MGI:4834328]	14.5697	0.00010234	0.00463495	4.90467	58.0618
ENSMUSG00000029570	Lfng	2505	LFNG O-fucosylpeptide 3-beta-N-acetylglucosaminyltransferase [Source:MGI Symbol;Acc:MGI:1095413]	-1.99828	0.000104237	0.00470295	28.9984	11.7561
ENSMUSG00000025366	Esyt1	7267	extended synaptotagmin-like protein 1 [Source:MGI Symbol;Acc:MGI:1344426]	2.20877	0.000104365	0.00470295	3.6566	6.40452
ENSMUSG00000031762	Mt2	588	metallothionein 2 [Source:MGI Symbol;Acc:MGI:97172]	10.4813	0.000104764	0.00470916	34.4019	292.326
ENSMUSG00000022272	Myo10	10122	myosin X [Source:MGI Symbol;Acc:MGI:107716]	1.95053	0.000105285	0.00472075	8.86458	13.9153
ENSMUSG00000115207	Gm49132	4144	predicted gene, 49132 [Source:MGI Symbol;Acc:MGI:6118542]	41.1617	0.000107359	0.00479788	0.036691	1.2648
ENSMUSG00000017144	Rnd3	4432	Rho family GTPase 3 [Source:MGI Symbol;Acc:MGI:1921444]	2.38869	0.000107846	0.00479788	12.9527	24.8201
ENSMUSG00000042406	Atf4	2358	activating transcription factor 4 [Source:MGI Symbol;Acc:MGI:88096]	2.14307	0.000107883	0.00479788	43.4172	74.9684
ENSMUSG00000013846	St3gal1	6851	ST3 beta-galactoside alpha-2,3-sialyltransferase 1 [Source:MGI Symbol;Acc:MGI:98304]	2.87631	0.000108072	0.00479788	2.59778	6.03913
ENSMUSG00000022016	Akap11	11015	A kinase (PRKA) anchor protein 11 [Source:MGI Symbol;Acc:MGI:2684060]	1.80261	0.000109449	0.00484703	10.1689	14.7983
ENSMUSG00000031565	Fgfr1	9875	fibroblast growth factor receptor 1 [Source:MGI Symbol;Acc:MGI:95522]	1.88809	0.000113811	0.00502783	26.0469	39.442
ENSMUSG00000027832	Ptx3	2682	pentraxin related gene [Source:MGI Symbol;Acc:MGI:104641]	120.934	0.000114636	0.00505184	1.07539	105.469
ENSMUSG00000024190	Dusp1	3311	dual specificity phosphatase 1 [Source:MGI Symbol;Acc:MGI:105120]	4.37682	0.000117716	0.00517491	19.8926	70.0345
ENSMUSG00000021493	Pdlim7	4849	PDZ and LIM domain 7 [Source:MGI Symbol;Acc:MGI:1914649]	2.12029	0.000118383	0.00519152	17.4538	29.7374
ENSMUSG00000030403	Vasp	2617	vasodilator-stimulated phosphoprotein [Source:MGI Symbol;Acc:MGI:109268]	1.99453	0.000119566	0.00522793	10.998	17.6638
ENSMUSG00000032020	Ubash3b	7326	ubiquitin associated and SH3 domain containing, B [Source:MGI Symbol;Acc:MGI:1920078]	3.55355	0.000119857	0.00522793	0.657344	1.876
ENSMUSG00000059923	Grb2	2916	growth factor receptor bound protein 2 [Source:MGI Symbol;Acc:MGI:95805]	1.75813	0.000120085	0.00522793	13.9902	19.9097
ENSMUSG00000034586	Hid1	4595	HID1 domain containing [Source:MGI Symbol;Acc:MGI:2445087]	3.08517	0.000122096	0.00529467	4.16088	10.0982
ENSMUSG00000102419	Gm36940	2036	predicted gene, 36940 [Source:MGI Symbol;Acc:MGI:5610168]	5.76097	0.000122324	0.00529467	0.947402	4.31416
ENSMUSG00000025059	Gk	7743	glycerol kinase [Source:MGI Symbol;Acc:MGI:106594]	3.10958	0.000122502	0.00529467	1.03327	2.6061
ENSMUSG00000102856	Gm37084	5898	predicted gene, 37084 [Source:MGI Symbol;Acc:MGI:5610312]	3.13512	0.00012352	0.00532589	1.71971	4.27986
ENSMUSG00000022671	Mzt2	1309	mitotic spindle organizing protein 2 [Source:MGI Symbol;Acc:MGI:1922845]	4.50632	0.000124286	0.00534609	2.53656	9.10615
ENSMUSG00000019256	Ahr	6163	aryl-hydrocarbon receptor [Source:MGI Symbol;Acc:MGI:105043]	2.98804	0.000125051	0.0053594	1.05059	2.51112
ENSMUSG00000031802	Phxr4	1391	per-hexamer repeat gene 4 [Source:MGI Symbol;Acc:MGI:104522]	3.32987	0.000125426	0.0053594	3.85095	10.3215
ENSMUSG00000060594	Layn	2409	layilin [Source:MGI Symbol;Acc:MGI:2685357]	3.64387	0.00012549	0.0053594	3.54577	10.1521
ENSMUSG00000030341	Tnfrsf1a	2591	tumor necrosis factor receptor superfamily, member 1a [Source:MGI Symbol;Acc:MGI:1314884]	1.85435	0.000126381	0.00538467	10.5085	15.637
ENSMUSG00000024927	Rela	3072	v-rel reticuloendotheliosis viral oncogene homolog A (avian) [Source:MGI Symbol;Acc:MGI:103290]	1.86962	0.000127162	0.00540514	20.7535	31.4631
ENSMUSG00000049225	Pdp1	4507	pyruvate dehyrogenase phosphatase catalytic subunit 1 [Source:MGI Symbol;Acc:MGI:2685870]	2.49198	0.00012784	0.00542112	2.59852	5.2004
ENSMUSG00000039671	Zmynd8	11031	zinc finger, MYND-type containing 8 [Source:MGI Symbol;Acc:MGI:1918025]	1.60336	0.000128299	0.00542781	7.87803	10.1508
ENSMUSG00000112023	Lilr4b	5439	leukocyte immunoglobulin-like receptor, subfamily B, member 4B [Source:MGI Symbol;Acc:MGI:102702]	177.6	0.000129474	0.00544996	0	0.170407
ENSMUSG00000021171	Esyt2	9143	extended synaptotagmin-like protein 2 [Source:MGI Symbol;Acc:MGI:1261845]	1.73941	0.000129492	0.00544996	3.49371	4.91211
ENSMUSG00000070564	Ntn5	2216	netrin 5 [Source:MGI Symbol;Acc:MGI:2685330]	19.3519	0.000129732	0.00544996	0.161043	2.4297
ENSMUSG00000051403	Ppp1r37	4110	protein phosphatase 1, regulatory subunit 37 [Source:MGI Symbol;Acc:MGI:2687042]	2.05358	0.000130405	0.00546149	10.8221	17.6765
ENSMUSG00000027939	Nup210l	5720	nucleoporin 210-like [Source:MGI Symbol;Acc:MGI:1924845]	4.89243	0.000130643	0.00546149	0.513169	1.98132
ENSMUSG00000056429	Tgoln1	5013	trans-golgi network protein [Source:MGI Symbol;Acc:MGI:105080]	1.74963	0.000130918	0.00546149	23.9853	33.7989
ENSMUSG00000078249	Hmga1b	1626	high mobility group AT-hook 1B [Source:MGI Symbol;Acc:MGI:96161]	9.05846	0.000132645	0.00552072	0.205987	1.5513
ENSMUSG00000035493	Tgfbi	3771	transforming growth factor, beta induced [Source:MGI Symbol;Acc:MGI:99959]	4.26166	0.000133092	0.00552483	3.61187	12.2445
ENSMUSG00000028917	Plekhm2	5186	pleckstrin homology domain containing, family M (with RUN domain) member 2 [Source:MGI Symbol;Acc:MGI:1916832]	1.77221	0.000133637	0.00552483	10.3902	14.7717
ENSMUSG00000054889	Dsp	9659	desmoplakin [Source:MGI Symbol;Acc:MGI:109611]	11.3648	0.000133665	0.00552483	0.28153	2.61389
ENSMUSG00000029863	Casp2	7057	caspase 2 [Source:MGI Symbol;Acc:MGI:97295]	-3.47246	0.0001341	0.00553008	2.33063	0.556295
ENSMUSG00000025351	Cd63	3682	CD63 antigen [Source:MGI Symbol;Acc:MGI:99529]	1.94702	0.000134504	0.00553404	23.0207	36.0974
ENSMUSG00000056537	Rlim	8917	ring finger protein, LIM domain interacting [Source:MGI Symbol;Acc:MGI:1342291]	1.72014	0.00013504	0.00554342	15.5684	21.6303
ENSMUSG00000026131	Dst	41619	dystonin [Source:MGI Symbol;Acc:MGI:104627]	2.15323	0.000136407	0.0055868	32.1357	54.8338
ENSMUSG00000114282	5330431K02Rik	1963	RIKEN cDNA 5330431K02 gene [Source:MGI Symbol;Acc:MGI:1915439]	3.51575	0.000137438	0.00561057	1.79435	4.9908
ENSMUSG00000028413	B4galt1	4234	UDP-Gal:betaGlcNAc beta 1,4- galactosyltransferase, polypeptide 1 [Source:MGI Symbol;Acc:MGI:95705]	2.00648	0.000137612	0.00561057	4.47966	7.2491
ENSMUSG00000002057	Foxn1	3214	forkhead box N1 [Source:MGI Symbol;Acc:MGI:102949]	12.5115	0.000139264	0.00566509	0.458231	4.67719
ENSMUSG00000053716	Dusp7	3356	dual specificity phosphatase 7 [Source:MGI Symbol;Acc:MGI:2387100]	2.28475	0.000140684	0.00570994	6.84926	12.7443
ENSMUSG00000058392	Rrp1b	7705	ribosomal RNA processing 1 homolog B (S. cerevisiae) [Source:MGI Symbol;Acc:MGI:1919712]	1.88831	0.000141077	0.00571298	2.48983	3.79444
ENSMUSG00000026586	Prrx1	11066	paired related homeobox 1 [Source:MGI Symbol;Acc:MGI:97712]	-2.12016	0.000141733	0.00572663	2.86504	1.08857
ENSMUSG00000118087	4833438C02Rik	1764	RIKEN cDNA 4833438C02 gene [Source:MGI Symbol;Acc:MGI:2147599]	3.13327	0.000143418	0.00578174	1.91318	4.85642
ENSMUSG00000115426	Gm19510	1861	predicted gene, 19510 [Source:MGI Symbol;Acc:MGI:5011695]	349.377	0.000146637	0.0058983	0	0.942348
ENSMUSG00000022052	Ppp2r2a	5381	protein phosphatase 2, regulatory subunit B, alpha [Source:MGI Symbol;Acc:MGI:1919228]	1.89072	0.000148492	0.00595955	10.9331	16.6054
ENSMUSG00000054414	Slc30a7	11116	solute carrier family 30 (zinc transporter), member 7 [Source:MGI Symbol;Acc:MGI:1913750]	1.95908	0.000150658	0.00603304	2.59945	4.05098
ENSMUSG00000032018	Sc5d	4866	sterol-C5-desaturase [Source:MGI Symbol;Acc:MGI:1353611]	1.83953	0.000152017	0.00607391	4.33268	6.42111
ENSMUSG00000029664	Tfpi2	1747	tissue factor pathway inhibitor 2 [Source:MGI Symbol;Acc:MGI:108543]	425.292	0.000153404	0.00609293	0	1.17818
ENSMUSG00000024401	Tnf	1639	tumor necrosis factor [Source:MGI Symbol;Acc:MGI:104798]	272.516	0.000153407	0.00609293	0	0.787264
ENSMUSG00000022389	Tef	7867	thyrotroph embryonic factor [Source:MGI Symbol;Acc:MGI:98663]	-2.07313	0.000153509	0.00609293	18.1207	7.06986
ENSMUSG00000105818	Gm43256	3091	predicted gene 43256 [Source:MGI Symbol;Acc:MGI:5663393]	4.23612	0.000154573	0.00612165	1.13914	3.87926
ENSMUSG00000029314	Gpat3	3502	glycerol-3-phosphate acyltransferase 3 [Source:MGI Symbol;Acc:MGI:3603816]	3.52778	0.000155031	0.00612629	1.20741	3.46133
ENSMUSG00000050721	Plekho2	5547	pleckstrin homology domain containing, family O member 2 [Source:MGI Symbol;Acc:MGI:2143132]	2.20972	0.00015597	0.00614985	1.89588	3.38585
ENSMUSG00000035299	Mid1	6720	midline 1 [Source:MGI Symbol;Acc:MGI:1100537]	2.85125	0.000157545	0.00619836	2.98926	6.75844
ENSMUSG00000039886	Tmem120a	1730	transmembrane protein 120A [Source:MGI Symbol;Acc:MGI:2686991]	2.91754	0.00015945	0.00625739	3.47102	8.22431
ENSMUSG00000028191	Bcl10	4564	B cell leukemia/lymphoma 10 [Source:MGI Symbol;Acc:MGI:1337994]	2.06717	0.000160079	0.00625739	3.44548	5.7721
ENSMUSG00000019923	Zwint	4434	ZW10 interactor [Source:MGI Symbol;Acc:MGI:1289227]	1.70413	0.000160089	0.00625739	38.5428	52.657
ENSMUSG00000090516	Rps11-ps1	475	ribosomal protein S11, pseudogene 1 [Source:MGI Symbol;Acc:MGI:3644744]	2.93686	0.000161985	0.00631775	7.23897	17.0021
ENSMUSG00000046836	Brox	5010	BRO1 domain and CAAX motif containing [Source:MGI Symbol;Acc:MGI:1918928]	-1.68222	0.000163685	0.00637026	10.6498	5.12418
ENSMUSG00000044442	N6amt1	6135	N-6 adenine-specific DNA methyltransferase 1 (putative) [Source:MGI Symbol;Acc:MGI:1915018]	-2.18359	0.000164121	0.00637342	3.50983	1.30572
ENSMUSG00000025171	Ubtd1	1687	ubiquitin domain containing 1 [Source:MGI Symbol;Acc:MGI:2385092]	2.61481	0.000164806	0.00638503	3.50444	7.45791
ENSMUSG00000024335	Brd2	7826	bromodomain containing 2 [Source:MGI Symbol;Acc:MGI:99495]	1.75127	0.00016513	0.00638503	28.1023	39.8131
ENSMUSG00000073557	Ppp1r12b	14983	protein phosphatase 1, regulatory subunit 12B [Source:MGI Symbol;Acc:MGI:1916417]	2.16167	0.000165503	0.00638571	2.3081	3.94747
ENSMUSG00000050370	Ch25h	1387	cholesterol 25-hydroxylase [Source:MGI Symbol;Acc:MGI:1333869]	24.6774	0.000168803	0.00649911	0.736005	14.7954
ENSMUSG00000049303	Syt12	5539	synaptotagmin XII [Source:MGI Symbol;Acc:MGI:2159601]	4.98196	0.000169879	0.00651544	0.449674	1.84712
ENSMUSG00000071267	Zfp942	5259	zinc finger protein 942 [Source:MGI Symbol;Acc:MGI:1920483]	-3.02193	0.000170184	0.00651544	2.65848	0.705464
ENSMUSG00000028249	Sdcbp	6904	syndecan binding protein [Source:MGI Symbol;Acc:MGI:1337026]	2.00145	0.000170315	0.00651544	6.41181	10.3993
ENSMUSG00000015143	Actn1	5533	actinin, alpha 1 [Source:MGI Symbol;Acc:MGI:2137706]	1.99024	0.000171462	0.00653449	19.9619	32.329
ENSMUSG00000034168	Irf2bpl	4098	interferon regulatory factor 2 binding protein-like [Source:MGI Symbol;Acc:MGI:2442463]	1.68805	0.000171539	0.00653449	29.6592	40.6808
ENSMUSG00000030655	Smg1	23984	SMG1 homolog, phosphatidylinositol 3-kinase-related kinase (C. elegans) [Source:MGI Symbol;Acc:MGI:1919742]	1.5959	0.000172292	0.00654927	7.55338	9.71096
ENSMUSG00000062661	Ncs1	4653	neuronal calcium sensor 1 [Source:MGI Symbol;Acc:MGI:109166]	2.26995	0.000173684	0.00658052	2.16274	3.93477
ENSMUSG00000040857	Erf	3607	Ets2 repressor factor [Source:MGI Symbol;Acc:MGI:109637]	2.00439	0.000173846	0.00658052	8.21647	13.1142
ENSMUSG00000015522	Arnt	8007	aryl hydrocarbon receptor nuclear translocator [Source:MGI Symbol;Acc:MGI:88071]	1.70171	0.000174653	0.00659718	6.3601	8.65105
ENSMUSG00000022139	Mbnl2	11993	muscleblind like splicing factor 2 [Source:MGI Symbol;Acc:MGI:2145597]	1.79067	0.000176156	0.00663999	12.5871	18.0081
ENSMUSG00000073411	H2-D1	2579	histocompatibility 2, D region locus 1 [Source:MGI Symbol;Acc:MGI:95896]	3.65769	0.000178169	0.00669224	8.92878	26.2749
ENSMUSG00000011837	Snapc2	1769	small nuclear RNA activating complex, polypeptide 2 [Source:MGI Symbol;Acc:MGI:1914861]	2.19768	0.000178286	0.00669224	5.9903	10.7034
ENSMUSG00000016946	Kctd5	3730	potassium channel tetramerisation domain containing 5 [Source:MGI Symbol;Acc:MGI:1916509]	-2.122	0.000179032	0.00670624	7.13271	2.69808
ENSMUSG00000022263	Trio	23395	triple functional domain (PTPRF interacting) [Source:MGI Symbol;Acc:MGI:1927230]	2.14702	0.000180301	0.0067376	7.66063	13.091
ENSMUSG00000028634	Hivep3	17627	human immunodeficiency virus type I enhancer binding protein 3 [Source:MGI Symbol;Acc:MGI:106589]	4.09627	0.000181005	0.0067376	0.733331	2.42929
ENSMUSG00000066278	Vps37b	2789	vacuolar protein sorting 37B [Source:MGI Symbol;Acc:MGI:1916724]	1.94906	0.000181247	0.0067376	5.51906	8.64156
ENSMUSG00000028163	Nfkb1	12061	nuclear factor of kappa light polypeptide gene enhancer in B cells 1, p105 [Source:MGI Symbol;Acc:MGI:97312]	2.97099	0.000181368	0.0067376	3.95216	9.50235
ENSMUSG00000052539	Magi3	8520	membrane associated guanylate kinase, WW and PDZ domain containing 3 [Source:MGI Symbol;Acc:MGI:1923484]	1.7327	0.000182643	0.00677097	13.8984	19.3135
ENSMUSG00000019907	Ppp1r12a	8020	protein phosphatase 1, regulatory subunit 12A [Source:MGI Symbol;Acc:MGI:1309528]	1.65379	0.000183332	0.00678254	17.4193	23.0681
ENSMUSG00000025402	Nab2	2941	Ngfi-A binding protein 2 [Source:MGI Symbol;Acc:MGI:107563]	2.36401	0.000185116	0.00683449	6.39577	12.0275
ENSMUSG00000020044	Timp3	8144	tissue inhibitor of metalloproteinase 3 [Source:MGI Symbol;Acc:MGI:98754]	2.46462	0.000186575	0.00687128	74.4654	149.329
ENSMUSG00000020773	Trim47	2735	tripartite motif-containing 47 [Source:MGI Symbol;Acc:MGI:1917374]	2.25914	0.000186877	0.00687128	8.34659	15.0564
ENSMUSG00000021712	Trim23	5747	tripartite motif-containing 23 [Source:MGI Symbol;Acc:MGI:1933161]	-2.05055	0.000188875	0.00693057	3.94228	1.56507
ENSMUSG00000059866	Tnip2	2685	TNFAIP3 interacting protein 2 [Source:MGI Symbol;Acc:MGI:2386643]	2.3423	0.000190163	0.00696359	6.83226	12.7348
ENSMUSG00000006390	Elovl1	2726	elongation of very long chain fatty acids (FEN1/Elo2, SUR4/Elo3, yeast)-like 1 [Source:MGI Symbol;Acc:MGI:1858959]	2.5354	0.000191766	0.00700802	3.54873	7.16351
ENSMUSG00000037580	Gch1	6251	GTP cyclohydrolase 1 [Source:MGI Symbol;Acc:MGI:95675]	3.53644	0.000192612	0.00702468	1.1953	3.37428
ENSMUSG00000049672	Zbtb14	4680	zinc finger and BTB domain containing 14 [Source:MGI Symbol;Acc:MGI:1195345]	-1.97646	0.000193311	0.0070359	4.2928	1.76045
ENSMUSG00000061458	Nol10	3021	nucleolar protein 10 [Source:MGI Symbol;Acc:MGI:2684913]	2.17598	0.000194611	0.00706889	6.59509	11.4029
ENSMUSG00000030980	Knop1	5880	lysine rich nucleolar protein 1 [Source:MGI Symbol;Acc:MGI:1913606]	-1.73993	0.00019638	0.00711876	10.0964	4.68687
ENSMUSG00000002885	Adgre5	3757	adhesion G protein-coupled receptor E5 [Source:MGI Symbol;Acc:MGI:1347095]	6.16282	0.000198186	0.0071698	0.150545	0.754427
ENSMUSG00000010175	Prox1	8390	prospero homeobox 1 [Source:MGI Symbol;Acc:MGI:97772]	-1.68589	0.000199614	0.00718607	85.5999	40.6352
ENSMUSG00000041997	Tlk1	6474	tousled-like kinase 1 [Source:MGI Symbol;Acc:MGI:2441683]	-1.59452	0.00019967	0.00718607	15.6418	7.89149
ENSMUSG00000027803	Wwtr1	4779	WW domain containing transcription regulator 1 [Source:MGI Symbol;Acc:MGI:1917649]	1.81526	0.000199983	0.00718607	9.1645	13.5115
ENSMUSG00000063428	Ddo	8925	D-aspartate oxidase [Source:MGI Symbol;Acc:MGI:1925528]	-2.79193	0.000200246	0.00718607	3.0591	0.88387
ENSMUSG00000058056	Palld	10292	palladin, cytoskeletal associated protein [Source:MGI Symbol;Acc:MGI:1919583]	2.18478	0.000200635	0.00718607	22.2011	39.3518
ENSMUSG00000024826	Dpf2	6501	D4, zinc and double PHD fingers family 2 [Source:MGI Symbol;Acc:MGI:109529]	-1.70321	0.000204049	0.00729382	8.0216	3.81992
ENSMUSG00000094870	Zfp131	4614	zinc finger protein 131 [Source:MGI Symbol;Acc:MGI:1919715]	1.78922	0.000204685	0.00730207	6.51296	9.44694
ENSMUSG00000054364	Rhob	2349	ras homolog family member B [Source:MGI Symbol;Acc:MGI:107949]	2.69524	0.0002055	0.00731286	34.5007	75.2553
ENSMUSG00000039990	Edrf1	6276	erythroid differentiation regulatory factor 1 [Source:MGI Symbol;Acc:MGI:1919831]	2.05828	0.000206121	0.00731286	4.08518	6.75115
ENSMUSG00000058291	Zfp68	7962	zinc finger protein 68 [Source:MGI Symbol;Acc:MGI:1344427]	-2.01476	0.000206208	0.00731286	4.34879	1.76057
ENSMUSG00000063632	Sox11	8311	SRY (sex determining region Y)-box 11 [Source:MGI Symbol;Acc:MGI:98359]	9.81708	0.000207652	0.00733403	0.171991	1.35248
ENSMUSG00000047881	Rell1	3856	RELT-like 1 [Source:MGI Symbol;Acc:MGI:2140767]	3.97684	0.00020793	0.00733403	3.64013	11.5807
ENSMUSG00000022629	Kif21a	6476	kinesin family member 21A [Source:MGI Symbol;Acc:MGI:109188]	1.72472	0.000208029	0.00733403	25.9089	35.7046
ENSMUSG00000000555	Itga5	4933	integrin alpha 5 (fibronectin receptor alpha) [Source:MGI Symbol;Acc:MGI:96604]	4.60767	0.000208662	0.00734195	5.89723	22.2135
ENSMUSG00000031504	Rab20	1392	RAB20, member RAS oncogene family [Source:MGI Symbol;Acc:MGI:102789]	10.1478	0.000209853	0.0073589	0.875138	7.16749
ENSMUSG00000009633	G0s2	871	G0/G1 switch gene 2 [Source:MGI Symbol;Acc:MGI:1316737]	-8.74119	0.000209962	0.0073589	2.27011	0.210854
ENSMUSG00000068134	Zfp120	4376	zinc finger protein 120 [Source:MGI Symbol;Acc:MGI:1345179]	-3.87725	0.00021056	0.00736551	2.10364	0.442825
ENSMUSG00000038415	Foxq1	4843	forkhead box Q1 [Source:MGI Symbol;Acc:MGI:1298228]	30.9241	0.000211367	0.0073657	0.046385	1.13258
ENSMUSG00000056752	Dnah9	15949	dynein, axonemal, heavy chain 9 [Source:MGI Symbol;Acc:MGI:1289279]	2.76126	0.000211385	0.0073657	0.428773	0.949689
ENSMUSG00000074183	Gsta1	956	glutathione S-transferase, alpha 1 (Ya) [Source:MGI Symbol;Acc:MGI:1095417]	38.556	0.000213281	0.00741564	0.0316932	1.21646
ENSMUSG00000085148	Mir22hg	1924	Mir22 host gene (non-protein coding) [Source:MGI Symbol;Acc:MGI:1914348]	2.76403	0.000213643	0.00741564	4.25085	9.34195
ENSMUSG00000044786	Zfp36	3470	zinc finger protein 36 [Source:MGI Symbol;Acc:MGI:99180]	14.5569	0.000219162	0.00759255	13.9338	163.103
ENSMUSG00000044674	Fzd1	4197	frizzled class receptor 1 [Source:MGI Symbol;Acc:MGI:1196625]	-2.23894	0.000220311	0.00761767	16.2934	5.93855
ENSMUSG00000057572	Zbtb8os	4500	zinc finger and BTB domain containing 8 opposite strand [Source:MGI Symbol;Acc:MGI:1914356]	-2.03373	0.000221575	0.00763305	3.77563	1.50504
ENSMUSG00000036432	Siah2	2999	siah E3 ubiquitin protein ligase 2 [Source:MGI Symbol;Acc:MGI:108062]	3.04755	0.000221605	0.00763305	1.47275	3.6073
ENSMUSG00000034201	Gas2l1	6100	growth arrest-specific 2 like 1 [Source:MGI Symbol;Acc:MGI:1926176]	1.83928	0.000223794	0.00769372	3.66758	5.43531
ENSMUSG00000002996	Hbp1	6167	high mobility group box transcription factor 1 [Source:MGI Symbol;Acc:MGI:894659]	-2.0996	0.000224727	0.00769934	7.39013	2.85617
ENSMUSG00000049421	Zfp260	5790	zinc finger protein 260 [Source:MGI Symbol;Acc:MGI:1347071]	-2.02371	0.000224959	0.00769934	5.38443	2.1694
ENSMUSG00000053110	Yap1	9257	yes-associated protein 1 [Source:MGI Symbol;Acc:MGI:103262]	1.73431	0.000225242	0.00769934	10.3088	14.3666
ENSMUSG00000013419	Zfp651	7063	zinc finger protein 651 [Source:MGI Symbol;Acc:MGI:2670992]	-1.62086	0.000225953	0.00770899	12.5387	6.24759
ENSMUSG00000067942	Zfp160	7194	zinc finger protein 160 [Source:MGI Symbol;Acc:MGI:108187]	-2.88002	0.000227582	0.00774985	2.31028	0.646273
ENSMUSG00000101939	Gm28438	345	predicted gene 28438 [Source:MGI Symbol;Acc:MGI:5579144]	1.77155	0.000228515	0.00776691	66.1651	94.2914
ENSMUSG00000022443	Myh9	12928	myosin, heavy polypeptide 9, non-muscle [Source:MGI Symbol;Acc:MGI:107717]	1.87787	0.000229031	0.00776977	60.6292	91.719
ENSMUSG00000028393	Alad	1871	aminolevulinate, delta-, dehydratase [Source:MGI Symbol;Acc:MGI:96853]	-1.801	0.000234197	0.00792321	52.4101	23.7809
ENSMUSG00000034761	Map4k5	8614	mitogen-activated protein kinase kinase kinase kinase 5 [Source:MGI Symbol;Acc:MGI:1925503]	1.75906	0.000234498	0.00792321	12.8426	18.149
ENSMUSG00000003031	Cdkn1b	4552	cyclin-dependent kinase inhibitor 1B [Source:MGI Symbol;Acc:MGI:104565]	-1.65715	0.000234876	0.00792321	13.4368	6.51105
ENSMUSG00000032369	Plscr1	2462	phospholipid scramblase 1 [Source:MGI Symbol;Acc:MGI:893575]	3.11785	0.00023532	0.00792331	1.16475	2.93752
ENSMUSG00000098188	Sowahc	4482	sosondowah ankyrin repeat domain family member C [Source:MGI Symbol;Acc:MGI:3606051]	2.40131	0.000236248	0.00792351	1.78494	3.43605
ENSMUSG00000063450	Syne2	26726	spectrin repeat containing, nuclear envelope 2 [Source:MGI Symbol;Acc:MGI:2449316]	1.76588	0.000236498	0.00792351	6.1489	8.763
ENSMUSG00000028059	Arhgef2	9844	rho/rac guanine nucleotide exchange factor (GEF) 2 [Source:MGI Symbol;Acc:MGI:103264]	2.07972	0.000236648	0.00792351	13.8444	22.9333
ENSMUSG00000032487	Ptgs2	4580	prostaglandin-endoperoxide synthase 2 [Source:MGI Symbol;Acc:MGI:97798]	39.6189	0.000237189	0.00792688	0.645041	20.9559
ENSMUSG00000110063	Gm31045	922	predicted gene, 31045 [Source:MGI Symbol;Acc:MGI:5590204]	24.1573	0.000238467	0.00795479	0.131016	2.74094
ENSMUSG00000039318	Rab3gap2	10800	RAB3 GTPase activating protein subunit 2 [Source:MGI Symbol;Acc:MGI:1916043]	1.87226	0.000239374	0.00797026	4.46822	6.6596
ENSMUSG00000037253	Mex3c	3738	mex3 RNA binding family member C [Source:MGI Symbol;Acc:MGI:2652843]	1.74691	0.000240045	0.00797785	12.1938	17.1388
ENSMUSG00000024949	Sf1	6211	splicing factor 1 [Source:MGI Symbol;Acc:MGI:1095403]	1.60687	0.000243068	0.00803757	26.042	33.7556
ENSMUSG00000032515	Csrnp1	3473	cysteine-serine-rich nuclear protein 1 [Source:MGI Symbol;Acc:MGI:2387989]	6.30807	0.000243272	0.00803757	10.131	52.1599
ENSMUSG00000032898	Fbxo21	5545	F-box protein 21 [Source:MGI Symbol;Acc:MGI:1924223]	-1.86899	0.000243449	0.00803757	9.40023	4.07572
ENSMUSG00000031485	Plpbp	12648	pyridoxal phosphate binding protein [Source:MGI Symbol;Acc:MGI:1891207]	1.7871	0.000243631	0.00803757	1.53263	2.20441
ENSMUSG00000031681	Smad1	6262	SMAD family member 1 [Source:MGI Symbol;Acc:MGI:109452]	1.98435	0.000245541	0.00808153	3.56631	5.68529
ENSMUSG00000029641	Rasl11a	1201	RAS-like, family 11, member A [Source:MGI Symbol;Acc:MGI:1916145]	7.43159	0.000245862	0.00808153	0.905268	5.35261
ENSMUSG00000033319	Fem1c	5726	fem-1 homolog c (C.elegans) [Source:MGI Symbol;Acc:MGI:2444737]	1.82322	0.000246583	0.00808519	5.86364	8.58255
ENSMUSG00000018736	Ndel1	3253	nudE neurodevelopment protein 1 like 1 [Source:MGI Symbol;Acc:MGI:1932915]	1.79341	0.000246873	0.00808519	11.5591	16.7403
ENSMUSG00000035697	Arhgap45	4478	Rho GTPase activating protein 45 [Source:MGI Symbol;Acc:MGI:1917969]	5.78899	0.000248286	0.00811669	0.148889	0.6921
ENSMUSG00000060260	Pwwp2b	5963	PWWP domain containing 2B [Source:MGI Symbol;Acc:MGI:2142008]	2.25234	0.000251391	0.00820328	1.03723	1.88158
ENSMUSG00000048285	Frmd6	6392	FERM domain containing 6 [Source:MGI Symbol;Acc:MGI:2442579]	2.36197	0.000257442	0.00837801	16.2826	31.0758
ENSMUSG00000040370	Etfrf1	2682	electron transfer flavoprotein regulatory factor 1 [Source:MGI Symbol;Acc:MGI:1914886]	-2.20582	0.000257677	0.00837801	5.67133	2.087
ENSMUSG00000006403	Adamts4	4810	a disintegrin-like and metallopeptidase (reprolysin type) with thrombospondin type 1 motif, 4 [Source:MGI Symbol;Acc:MGI:1339949]	4.06779	0.00025982	0.00843244	23.6112	76.0534
ENSMUSG00000024687	Osbp	4488	oxysterol binding protein [Source:MGI Symbol;Acc:MGI:97447]	-1.58006	0.000260829	0.00844062	16.3256	8.36302
ENSMUSG00000044641	Pard6b	3399	par-6 family cell polarity regulator beta [Source:MGI Symbol;Acc:MGI:2135605]	2.80699	0.000261477	0.00844062	3.38095	7.62616
ENSMUSG00000019842	Traf3ip2	3687	TRAF3 interacting protein 2 [Source:MGI Symbol;Acc:MGI:2143599]	3.86488	0.000261658	0.00844062	0.848599	2.63454
ENSMUSG00000108368	Gm45053	2499	predicted gene 45053 [Source:MGI Symbol;Acc:MGI:5753629]	5.74738	0.00026195	0.00844062	0.890473	4.06192
ENSMUSG00000022146	Osmr	12113	oncostatin M receptor [Source:MGI Symbol;Acc:MGI:1330819]	4.56468	0.000264432	0.00850534	2.64605	9.57797
ENSMUSG00000036790	Slitrk2	8080	SLIT and NTRK-like family, member 2 [Source:MGI Symbol;Acc:MGI:2679449]	3.80978	0.000265572	0.00852653	0.529695	1.61562
ENSMUSG00000021036	Sptlc2	8115	serine palmitoyltransferase, long chain base subunit 2 [Source:MGI Symbol;Acc:MGI:108074]	1.74826	0.00026619	0.00852653	2.93088	4.10781
ENSMUSG00000034593	Myo5a	14803	myosin VA [Source:MGI Symbol;Acc:MGI:105976]	1.70762	0.000266968	0.00852653	4.84529	6.64326
ENSMUSG00000055612	Cdca7	3202	cell division cycle associated 7 [Source:MGI Symbol;Acc:MGI:1914203]	-3.28566	0.000267032	0.00852653	3.77104	0.915345
ENSMUSG00000028211	Trp53inp1	6475	transformation related protein 53 inducible nuclear protein 1 [Source:MGI Symbol;Acc:MGI:1926609]	-2.66626	0.000267462	0.00852653	5.76179	1.75405
ENSMUSG00000059434	Gckr	4335	glucokinase regulatory protein [Source:MGI Symbol;Acc:MGI:1096345]	2.45598	0.000269201	0.0085668	3.84719	7.64929
ENSMUSG00000020190	Mknk2	3892	MAP kinase-interacting serine/threonine kinase 2 [Source:MGI Symbol;Acc:MGI:894279]	1.95588	0.000270232	0.00858441	11.6768	18.2575
ENSMUSG00000003746	Man1a	9647	mannosidase 1, alpha [Source:MGI Symbol;Acc:MGI:104677]	2.47207	0.000271811	0.00860492	1.15563	2.31424
ENSMUSG00000058503	Fam133b	7398	family with sequence similarity 133, member B [Source:MGI Symbol;Acc:MGI:1915402]	1.85276	0.000271835	0.00860492	4.6249	6.83277
ENSMUSG00000091956	C2cd4b	1327	C2 calcium-dependent domain containing 4B [Source:MGI Symbol;Acc:MGI:1922947]	65.4601	0.000273011	0.00862694	0.149374	8.17203
ENSMUSG00000003949	Hlf	6681	hepatic leukemia factor [Source:MGI Symbol;Acc:MGI:96108]	-1.59603	0.000276135	0.0086904	20.7297	10.5185
ENSMUSG00000036030	Prtg	9158	protogenin [Source:MGI Symbol;Acc:MGI:2444710]	2.31132	0.000276722	0.0086904	1.83017	3.34998
ENSMUSG00000011179	Odc1	3405	ornithine decarboxylase, structural 1 [Source:MGI Symbol;Acc:MGI:97402]	2.6139	0.000276789	0.0086904	49.6478	104.588
ENSMUSG00000032578	Cish	6419	cytokine inducible SH2-containing protein [Source:MGI Symbol;Acc:MGI:103159]	12.6454	0.000276952	0.0086904	0.146378	1.51429
ENSMUSG00000034485	Uaca	5807	uveal autoantigen with coiled-coil domains and ankyrin repeats [Source:MGI Symbol;Acc:MGI:1919815]	1.94669	0.000278235	0.00871544	62.9574	98.1752
ENSMUSG00000041133	Smc1a	5769	structural maintenance of chromosomes 1A [Source:MGI Symbol;Acc:MGI:1344345]	1.62687	0.000281379	0.0087986	33.6849	43.9374
ENSMUSG00000057604	Lmcd1	1730	LIM and cysteine-rich domains 1 [Source:MGI Symbol;Acc:MGI:1353635]	12.6817	0.000282923	0.00883152	0.181118	1.90984
ENSMUSG00000020439	Smtn	4380	smoothelin [Source:MGI Symbol;Acc:MGI:1354727]	3.92461	0.000284484	0.00886487	4.34643	13.8518
ENSMUSG00000074637	Sox2	2057	SRY (sex determining region Y)-box 2 [Source:MGI Symbol;Acc:MGI:98364]	-1.62765	0.00028542	0.00887863	29.5626	14.5748
ENSMUSG00000044221	Grsf1	3036	G-rich RNA sequence binding factor 1 [Source:MGI Symbol;Acc:MGI:106479]	-1.62103	0.000287349	0.0089232	16.6365	8.33204
ENSMUSG00000040363	Bcor	8666	BCL6 interacting corepressor [Source:MGI Symbol;Acc:MGI:1918708]	1.7018	0.000288521	0.00894415	11.0165	14.9582
ENSMUSG00000031148	Gpkow	3737	G patch domain and KOW motifs [Source:MGI Symbol;Acc:MGI:1859610]	1.73245	0.000290947	0.00900384	6.56765	9.17548
ENSMUSG00000074733	Zfp950	10615	zinc finger protein 950 [Source:MGI Symbol;Acc:MGI:2652824]	-2.27663	0.000299437	0.00925064	1.60415	0.567883
ENSMUSG00000003545	Fosb	6243	FBJ osteosarcoma oncogene B [Source:MGI Symbol;Acc:MGI:95575]	130.486	0.000303531	0.00936103	1.89203	198.303
ENSMUSG00000020423	Btg2	2743	B cell translocation gene 2, anti-proliferative [Source:MGI Symbol;Acc:MGI:108384]	7.09758	0.000306383	0.00943281	27.934	159.649
ENSMUSG00000025348	Itga7	8092	integrin alpha 7 [Source:MGI Symbol;Acc:MGI:102700]	4.94286	0.000308835	0.00948372	1.70273	6.6534
ENSMUSG00000037960	Card19	1477	caspase recruitment domain family, member 19 [Source:MGI Symbol;Acc:MGI:1915730]	2.13453	0.000309091	0.00948372	7.79877	13.3093
ENSMUSG00000019254	Ppp1r12c	4960	protein phosphatase 1, regulatory subunit 12C [Source:MGI Symbol;Acc:MGI:1924258]	1.77715	0.000309843	0.00948372	9.90459	14.0525
ENSMUSG00000026535	Ifi202b	1697	interferon activated gene 202B [Source:MGI Symbol;Acc:MGI:1347083]	47.3246	0.000310146	0.00948372	0.0900478	3.63984
ENSMUSG00000032502	Stac	2644	src homology three (SH3) and cysteine rich domain [Source:MGI Symbol;Acc:MGI:1201400]	4.14313	0.000313276	0.00956317	2.17561	7.34676
ENSMUSG00000006445	Epha2	4674	Eph receptor A2 [Source:MGI Symbol;Acc:MGI:95278]	2.31012	0.000314838	0.00959454	16.3887	30.7009
ENSMUSG00000021469	Msx2	3279	msh homeobox 2 [Source:MGI Symbol;Acc:MGI:97169]	-3.18657	0.000320851	0.00976125	3.76015	0.936078
ENSMUSG00000043415	Otud1	2832	OTU domain containing 1 [Source:MGI Symbol;Acc:MGI:1918448]	4.57988	0.000322233	0.0097708	7.80229	28.5816
ENSMUSG00000115161	Gm20555	3433	predicted gene, 20555 [Source:MGI Symbol;Acc:MGI:5295662]	4.12366	0.000322252	0.0097708	0.664711	2.16561
ENSMUSG00000024222	Fkbp5	9468	FK506 binding protein 5 [Source:MGI Symbol;Acc:MGI:104670]	-2.61812	0.000323927	0.00980507	5.73506	1.76598
ENSMUSG00000029587	Zfp12	5821	zinc finger protein 12 [Source:MGI Symbol;Acc:MGI:99157]	-1.89539	0.000324639	0.00981011	6.07022	2.5961
ENSMUSG00000039474	Wfs1	3787	wolframin ER transmembrane glycoprotein [Source:MGI Symbol;Acc:MGI:1328355]	1.8169	0.000327676	0.00988525	5.88868	8.6876
ENSMUSG00000036412	Arsi	2975	arylsulfatase i [Source:MGI Symbol;Acc:MGI:2670959]	-1.92599	0.00033097	0.00996792	66.7232	28.2961
ENSMUSG00000020019	Ntn4	3741	netrin 4 [Source:MGI Symbol;Acc:MGI:1888978]	-2.18245	0.000334606	0.0100606	30.7051	11.4766
ENSMUSG00000061232	H2-K1	2938	histocompatibility 2, K1, K region [Source:MGI Symbol;Acc:MGI:95904]	2.49574	0.000336115	0.0100887	13.89	27.762
ENSMUSG00000103593	Gm37352	2181	predicted gene, 37352 [Source:MGI Symbol;Acc:MGI:5610580]	5.76554	0.000336665	0.0100887	4.3558	19.6147
ENSMUSG00000008318	Relt	3280	RELT tumor necrosis factor receptor [Source:MGI Symbol;Acc:MGI:2443373]	3.77939	0.000338283	0.0101203	1.28954	3.91052
ENSMUSG00000111212	Gm47087	4233	predicted gene, 47087 [Source:MGI Symbol;Acc:MGI:6095814]	3.31596	0.000340087	0.0101473	3.33188	8.88707
ENSMUSG00000036206	Sh3bp4	5112	SH3-domain binding protein 4 [Source:MGI Symbol;Acc:MGI:2138297]	1.8655	0.000340312	0.0101473	5.70125	8.57171
ENSMUSG00000001750	Tcirg1	4603	T cell, immune regulator 1, ATPase, H+ transporting, lysosomal V0 protein A3 [Source:MGI Symbol;Acc:MGI:1350931]	1.94548	0.000341702	0.0101719	1.51522	2.367
ENSMUSG00000049305	Ccdc71	3267	coiled-coil domain containing 71 [Source:MGI Symbol;Acc:MGI:1919704]	-1.91562	0.000342966	0.0101926	7.02469	2.9681
ENSMUSG00000096957	E230013L22Rik	1856	RIKEN cDNA E230013L22 gene [Source:MGI Symbol;Acc:MGI:2142601]	27.0789	0.000345363	0.0102469	0.0490859	1.15268
ENSMUSG00000025856	Pdgfa	3119	platelet derived growth factor, alpha [Source:MGI Symbol;Acc:MGI:97527]	2.3484	0.000350292	0.010376	3.40543	6.4166
ENSMUSG00000028156	Eif4e	6008	eukaryotic translation initiation factor 4E [Source:MGI Symbol;Acc:MGI:95305]	1.65576	0.000351418	0.0103923	7.99301	10.7651
ENSMUSG00000052560	Cpne8	4164	copine VIII [Source:MGI Symbol;Acc:MGI:1914121]	2.50524	0.000352397	0.0104041	2.24025	4.5602
ENSMUSG00000032068	Plet1	1947	placenta expressed transcript 1 [Source:MGI Symbol;Acc:MGI:1923759]	12.1365	0.000353162	0.0104096	0.534251	5.34727
ENSMUSG00000066232	Ipo7	11169	importin 7 [Source:MGI Symbol;Acc:MGI:2152414]	1.87519	0.000354296	0.0104259	8.69425	13.0819
ENSMUSG00000022507	1810013L24Rik	4960	RIKEN cDNA 1810013L24 gene [Source:MGI Symbol;Acc:MGI:1916303]	1.6992	0.000356025	0.0104597	12.7759	17.409
ENSMUSG00000113326	Gm47586	2028	predicted gene, 47586 [Source:MGI Symbol;Acc:MGI:6096627]	3.01298	0.000357338	0.0104811	3.04307	7.25326
ENSMUSG00000095253	Zfp799	6382	zinc finger protein 799 [Source:MGI Symbol;Acc:MGI:2443934]	-2.17231	0.000359177	0.010516	3.72736	1.39075
ENSMUSG00000031441	Atp11a	11150	ATPase, class VI, type 11A [Source:MGI Symbol;Acc:MGI:1354735]	1.53567	0.000359698	0.010516	10.9989	13.6026
ENSMUSG00000078546	Zfp995	3167	zinc finger protein 995 [Source:MGI Symbol;Acc:MGI:1917331]	-4.24911	0.000360393	0.0105193	1.85645	0.354018
ENSMUSG00000107136	Gm42466	1301	predicted gene 42466 [Source:MGI Symbol;Acc:MGI:5662603]	7.9136	0.000361689	0.01054	0.451632	2.8649
ENSMUSG00000027562	Car2	2422	carbonic anhydrase 2 [Source:MGI Symbol;Acc:MGI:88269]	1.81793	0.000363218	0.0105674	32.3254	47.7905
ENSMUSG00000030681	Mvp	7627	major vault protein [Source:MGI Symbol;Acc:MGI:1925638]	1.68584	0.000364169	0.010578	5.32539	7.25367
ENSMUSG00000016559	H3f3b	2976	H3 histone, family 3B [Source:MGI Symbol;Acc:MGI:1101768]	2.16023	0.000365803	0.0106083	103.142	180.379
ENSMUSG00000027293	Ehd4	4007	EH-domain containing 4 [Source:MGI Symbol;Acc:MGI:1919619]	3.88197	0.000367069	0.0106279	3.01463	9.5029
ENSMUSG00000005413	Hmox1	1751	heme oxygenase 1 [Source:MGI Symbol;Acc:MGI:96163]	4.23133	0.00037076	0.0107175	9.63731	33.1928
ENSMUSG00000102494	Gm36988	2408	predicted gene, 36988 [Source:MGI Symbol;Acc:MGI:5610216]	3.50842	0.000373671	0.0107843	1.06469	3.05131
ENSMUSG00000038520	Tbc1d17	9726	TBC1 domain family, member 17 [Source:MGI Symbol;Acc:MGI:2449973]	-1.96243	0.000375068	0.0107908	3.08589	1.26655
ENSMUSG00000026014	Raph1	20498	Ras association (RalGDS/AF-6) and pleckstrin homology domains 1 [Source:MGI Symbol;Acc:MGI:1924550]	2.18685	0.000375557	0.0107908	1.66744	2.8896
ENSMUSG00000001542	Ell2	9828	elongation factor RNA polymerase II 2 [Source:MGI Symbol;Acc:MGI:2183438]	1.91048	0.000376501	0.0107908	7.56238	11.608
ENSMUSG00000020905	Usp43	4745	ubiquitin specific peptidase 43 [Source:MGI Symbol;Acc:MGI:2444541]	5.16753	0.000377488	0.0107908	0.146254	0.624629
ENSMUSG00000060301	2610008E11Rik	5940	RIKEN cDNA 2610008E11 gene [Source:MGI Symbol;Acc:MGI:1919378]	-2.35673	0.000377704	0.0107908	4.08023	1.41076
ENSMUSG00000018899	Irf1	3976	interferon regulatory factor 1 [Source:MGI Symbol;Acc:MGI:96590]	3.60794	0.000377736	0.0107908	7.28166	20.8047
ENSMUSG00000038774	Ascc3	16685	activating signal cointegrator 1 complex subunit 3 [Source:MGI Symbol;Acc:MGI:1925237]	1.79669	0.000378097	0.0107908	2.13621	3.07446
ENSMUSG00000037321	Tap1	5476	transporter 1, ATP-binding cassette, sub-family B (MDR/TAP) [Source:MGI Symbol;Acc:MGI:98483]	2.8638	0.000379725	0.01082	1.14557	2.63767
ENSMUSG00000020458	Rtn4	6991	reticulon 4 [Source:MGI Symbol;Acc:MGI:1915835]	1.64938	0.000382675	0.0108869	38.464	51.1607
ENSMUSG00000039031	Arhgap18	6602	Rho GTPase activating protein 18 [Source:MGI Symbol;Acc:MGI:1921160]	1.77936	0.000383899	0.0109041	5.7261	8.12741
ENSMUSG00000024206	Rfx2	7311	regulatory factor X, 2 (influences HLA class II expression) [Source:MGI Symbol;Acc:MGI:106583]	2.16234	0.000384509	0.0109041	1.2223	2.10741
ENSMUSG00000109336	Samd4b	4672	sterile alpha motif domain containing 4B [Source:MGI Symbol;Acc:MGI:2448542]	1.6466	0.0003851	0.0109041	14.3637	19.1077
ENSMUSG00000020696	Rffl	5922	ring finger and FYVE like domain containing protein [Source:MGI Symbol;Acc:MGI:1914588]	-2.00409	0.000386589	0.0109109	3.91312	1.57439
ENSMUSG00000000078	Klf6	4391	Kruppel-like factor 6 [Source:MGI Symbol;Acc:MGI:1346318]	3.76866	0.000386695	0.0109109	27.2122	82.882
ENSMUSG00000040152	Thbs1	6073	thrombospondin 1 [Source:MGI Symbol;Acc:MGI:98737]	11.5601	0.00038716	0.0109109	5.89348	54.4761
ENSMUSG00000074221	Zfp568	7354	zinc finger protein 568 [Source:MGI Symbol;Acc:MGI:2142347]	1.95401	0.000387975	0.0109167	6.5924	10.2829
ENSMUSG00000063894	Zkscan8	8902	zinc finger with KRAB and SCAN domains 8 [Source:MGI Symbol;Acc:MGI:1913815]	-2.02687	0.000388725	0.0109207	3.89016	1.56027
ENSMUSG00000025270	Alas2	2403	aminolevulinic acid synthase 2, erythroid [Source:MGI Symbol;Acc:MGI:87990]	7.24449	0.000389612	0.0109286	0.845473	5.0716
ENSMUSG00000053846	Lipg	4715	lipase, endothelial [Source:MGI Symbol;Acc:MGI:1341803]	22.5508	0.000393267	0.0110139	0.149201	2.72577
ENSMUSG00000023892	Zfp51	2574	zinc finger protein 51 [Source:MGI Symbol;Acc:MGI:99198]	-2.67898	0.000393908	0.0110147	3.92702	1.20025
ENSMUSG00000026536	Ifi211	1785	interferon activated gene 211 [Source:MGI Symbol;Acc:MGI:3041120]	5.12091	0.000404301	0.0112878	0.288729	1.22246
ENSMUSG00000029833	Trim24	8521	tripartite motif-containing 24 [Source:MGI Symbol;Acc:MGI:109275]	-1.61031	0.00040814	0.0113773	6.84413	3.42689
ENSMUSG00000027544	Nfatc2	10578	nuclear factor of activated T cells, cytoplasmic, calcineurin dependent 2 [Source:MGI Symbol;Acc:MGI:102463]	5.02665	0.000410587	0.0114278	1.3182	5.32802
ENSMUSG00000021591	Glrx	5494	glutaredoxin [Source:MGI Symbol;Acc:MGI:2135625]	5.85428	0.00041181	0.0114441	0.286718	1.38888
ENSMUSG00000026819	Slc25a25	7862	solute carrier family 25 (mitochondrial carrier, phosphate carrier), member 25 [Source:MGI Symbol;Acc:MGI:1915913]	2.18496	0.000413955	0.0114737	4.35632	7.70656
ENSMUSG00000074179	Gm10639	1074	predicted gene 10639 [Source:MGI Symbol;Acc:MGI:3704339]	91.173	0.000414499	0.0114737	0.0140852	1.57179
ENSMUSG00000022246	Rai14	8462	retinoic acid induced 14 [Source:MGI Symbol;Acc:MGI:1922896]	1.68783	0.00041523	0.0114737	23.204	31.3484
ENSMUSG00000061544	Zfp229	5139	zinc finger protein 229 [Source:MGI Symbol;Acc:MGI:2679295]	-2.52843	0.000415427	0.0114737	1.86159	0.592922
ENSMUSG00000053253	Ndfip2	11553	Nedd4 family interacting protein 2 [Source:MGI Symbol;Acc:MGI:1923523]	1.75053	0.000419761	0.0115756	2.18916	3.08298
ENSMUSG00000032118	Fez1	4104	fasciculation and elongation protein zeta 1 (zygin I) [Source:MGI Symbol;Acc:MGI:2670976]	-1.7659	0.000420588	0.0115807	17.6341	8.15016
ENSMUSG00000055003	Lrtm2	4102	leucine-rich repeats and transmembrane domains 2 [Source:MGI Symbol;Acc:MGI:2141485]	1.83956	0.000424097	0.0116594	10.6934	15.8782
ENSMUSG00000050066	A130023I24Rik	3232	RIKEN cDNA A130023I24 gene [Source:MGI Symbol;Acc:MGI:2444285]	121.956	0.000424809	0.0116612	0.00467682	0.673018
ENSMUSG00000039633	Lonrf1	3930	LON peptidase N-terminal domain and ring finger 1 [Source:MGI Symbol;Acc:MGI:3609241]	1.70668	0.000426764	0.011697	7.42749	10.2655
ENSMUSG00000042662	Dusp15	4391	dual specificity phosphatase-like 15 [Source:MGI Symbol;Acc:MGI:1934928]	-2.66871	0.000428304	0.0117213	10.3888	3.14681
ENSMUSG00000062825	Actg1	2658	actin, gamma, cytoplasmic 1 [Source:MGI Symbol;Acc:MGI:87906]	2.86247	0.00043453	0.0118736	96.761	225.597
ENSMUSG00000031822	Gse1	10351	genetic suppressor element 1, coiled-coil protein [Source:MGI Symbol;Acc:MGI:1098275]	1.72149	0.000435709	0.0118878	8.86305	12.1629
ENSMUSG00000097804	Gm16685	1592	predicted gene, 16685 [Source:MGI Symbol;Acc:MGI:4439609]	309.016	0.000437204	0.0119105	0	0.987456
ENSMUSG00000005087	Cd44	6776	CD44 antigen [Source:MGI Symbol;Acc:MGI:88338]	1.87083	0.000438157	0.0119184	54.3928	81.3602
ENSMUSG00000019763	Rmnd1	5894	required for meiotic nuclear division 1 homolog [Source:MGI Symbol;Acc:MGI:1913334]	3.65617	0.000439031	0.0119241	2.15816	6.18841
ENSMUSG00000069874	Irgm2	3690	immunity-related GTPase family M member 2 [Source:MGI Symbol;Acc:MGI:1926262]	3.2029	0.000440741	0.0119525	1.35742	3.46849
ENSMUSG00000005686	Ampd3	5627	adenosine monophosphate deaminase 3 [Source:MGI Symbol;Acc:MGI:1096344]	4.3357	0.000442346	0.011978	0.929352	3.31875
ENSMUSG00000109429	Gm45223	5138	predicted gene 45223 [Source:MGI Symbol;Acc:MGI:5753799]	3.34701	0.000446604	0.0120691	0.6457	1.73421
ENSMUSG00000027800	Tm4sf1	4163	transmembrane 4 superfamily member 1 [Source:MGI Symbol;Acc:MGI:104678]	5.79803	0.000447054	0.0120691	12.4867	57.7668
ENSMUSG00000042988	Notum	2408	notum palmitoleoyl-protein carboxylesterase [Source:MGI Symbol;Acc:MGI:1924833]	2.88357	0.000447832	0.012072	2.72712	6.43151
ENSMUSG00000028583	Pdpn	1817	podoplanin [Source:MGI Symbol;Acc:MGI:103098]	1.86689	0.000450713	0.0121315	94.63	142.76
ENSMUSG00000087598	Zfp111	10160	zinc finger protein 111 [Source:MGI Symbol;Acc:MGI:1929114]	-2.50507	0.000452331	0.0121568	1.6594	0.541613
ENSMUSG00000025064	Col17a1	6011	collagen, type XVII, alpha 1 [Source:MGI Symbol;Acc:MGI:88450]	9.69634	0.000453964	0.0121825	0.0842152	0.707718
ENSMUSG00000020473	Aebp1	4058	AE binding protein 1 [Source:MGI Symbol;Acc:MGI:1197012]	2.02301	0.000454932	0.0121903	25.0861	40.714
ENSMUSG00000003119	Cdk12	11730	cyclin-dependent kinase 12 [Source:MGI Symbol;Acc:MGI:1098802]	1.70566	0.000457617	0.012244	6.48217	8.82895
ENSMUSG00000049657	Zbtb5	5606	zinc finger and BTB domain containing 5 [Source:MGI Symbol;Acc:MGI:1924601]	-2.03299	0.00045838	0.0122462	4.93773	1.95796
ENSMUSG00000028646	Rragc	3341	Ras-related GTP binding C [Source:MGI Symbol;Acc:MGI:1858751]	-1.63116	0.000459557	0.0122594	11.176	5.54199
ENSMUSG00000047875	Gpr157	4900	G protein-coupled receptor 157 [Source:MGI Symbol;Acc:MGI:2442046]	-3.64299	0.000460794	0.0122742	2.25798	0.495518
ENSMUSG00000034059	Ypel4	2614	yippee like 4 [Source:MGI Symbol;Acc:MGI:3605071]	3.59142	0.000461516	0.0122752	1.9251	5.50146
ENSMUSG00000029104	Htt	24438	huntingtin [Source:MGI Symbol;Acc:MGI:96067]	1.69816	0.000468534	0.012428	3.9079	5.29163
ENSMUSG00000114822	Gm4813	799	predicted gene 4813 [Source:MGI Symbol;Acc:MGI:3648783]	8.84406	0.000468641	0.012428	0.303278	2.19032
ENSMUSG00000032085	Tagln	1988	transgelin [Source:MGI Symbol;Acc:MGI:106012]	14.9345	0.000471668	0.0124862	2.22897	27.3187
ENSMUSG00000031921	Terf2	4597	telomeric repeat binding factor 2 [Source:MGI Symbol;Acc:MGI:1195972]	-1.81029	0.000472224	0.0124862	6.34417	2.83768
ENSMUSG00000028435	Aqp3	1829	aquaporin 3 [Source:MGI Symbol;Acc:MGI:1333777]	13.4481	0.000474303	0.0125227	0.114794	1.32325
ENSMUSG00000032411	Tfdp2	14029	transcription factor Dp 2 [Source:MGI Symbol;Acc:MGI:107167]	-1.87295	0.000477177	0.012564	3.26337	1.40401
ENSMUSG00000042549	Map2k3os	1291	mitogen-activated protein kinase kinase 3, opposite strand [Source:MGI Symbol;Acc:MGI:1344334]	14.6742	0.000477264	0.012564	0.568235	7.15408
ENSMUSG00000035439	Haus8	5278	4HAUS augmin-like complex, subunit 8 [Source:MGI Symbol;Acc:MGI:1923728]	2.15826	0.000478723	0.012584	2.21802	3.83901
ENSMUSG00000027777	Schip1	5102	schwannomin interacting protein 1 [Source:MGI Symbol;Acc:MGI:1353557]	3.09478	0.000480021	0.0125997	0.592392	1.47826
ENSMUSG00000113776	Gm19327	3271	predicted gene, 19327 [Source:MGI Symbol;Acc:MGI:5011512]	6.14273	0.000481261	0.0126138	0.588928	2.82933
ENSMUSG00000032413	Rasa2	15856	RAS p21 protein activator 2 [Source:MGI Symbol;Acc:MGI:2149960]	1.84949	0.000484513	0.0126633	1.69966	2.52765
ENSMUSG00000045598	Zfp553	3976	zinc finger protein 553 [Source:MGI Symbol;Acc:MGI:2384725]	-2.07514	0.000484557	0.0126633	4.61167	1.8087
ENSMUSG00000026339	Ccdc93	11445	coiled-coil domain containing 93 [Source:MGI Symbol;Acc:MGI:1918079]	-1.8093	0.000486634	0.0126813	1.75487	0.782009
ENSMUSG00000034248	Slc25a37	6021	solute carrier family 25, member 37 [Source:MGI Symbol;Acc:MGI:1914962]	1.94137	0.000487076	0.0126813	1.52693	2.39009
ENSMUSG00000004328	Hif3a	6710	hypoxia inducible factor 3, alpha subunit [Source:MGI Symbol;Acc:MGI:1859778]	-5.72805	0.000487364	0.0126813	2.69901	0.383211
ENSMUSG00000069089	Cdk7	3706	cyclin-dependent kinase 7 [Source:MGI Symbol;Acc:MGI:102956]	-2.22377	0.000490448	0.0127431	6.18298	2.24385
ENSMUSG00000027007	Itprid2	5599	ITPR interacting domain containing 2 [Source:MGI Symbol;Acc:MGI:1917849]	1.57858	0.000494913	0.0128195	14.3526	18.0832
ENSMUSG00000032870	Smap2	3160	small ArfGAP 2 [Source:MGI Symbol;Acc:MGI:1917030]	1.76698	0.000496376	0.0128195	5.57745	7.97167
ENSMUSG00000032265	Tent5a	5703	terminal nucleotidyltransferase 5A [Source:MGI Symbol;Acc:MGI:2670964]	2.36039	0.000496498	0.0128195	2.9453	5.54496
ENSMUSG00000055436	Srsf11	8446	serine/arginine-rich splicing factor 11 [Source:MGI Symbol;Acc:MGI:1916457]	1.72153	0.000496727	0.0128195	14.9497	20.5451
ENSMUSG00000021091	Serpina3n	2064	serine (or cysteine) peptidase inhibitor, clade A, member 3N [Source:MGI Symbol;Acc:MGI:105045]	8.28577	0.000497652	0.0128195	9.49199	63.229
ENSMUSG00000039942	Ptger4	6648	prostaglandin E receptor 4 (subtype EP4) [Source:MGI Symbol;Acc:MGI:104311]	8.34343	0.000497663	0.0128195	0.0710262	0.490053
ENSMUSG00000049164	Zfp518a	6840	zinc finger protein 518A [Source:MGI Symbol;Acc:MGI:1919922]	-1.80123	0.000502849	0.012921	3.40025	1.52127
ENSMUSG00000071660	Ttc9c	3984	tetratricopeptide repeat domain 9C [Source:MGI Symbol;Acc:MGI:1917637]	-2.00649	0.000503406	0.012921	3.45683	1.40311
ENSMUSG00000106475	Gm43011	4433	predicted gene 43011 [Source:MGI Symbol;Acc:MGI:5663148]	2.91645	0.000503763	0.012921	1.55025	3.68778
ENSMUSG00000024912	Fosl1	2033	fos-like antigen 1 [Source:MGI Symbol;Acc:MGI:107179]	6.05508	0.000506946	0.0129736	17.9521	89.2253
ENSMUSG00000009376	Met	7679	met proto-oncogene [Source:MGI Symbol;Acc:MGI:96969]	3.17486	0.000507254	0.0129736	1.19265	3.0951
ENSMUSG00000029676	Pot1a	8669	protection of telomeres 1A [Source:MGI Symbol;Acc:MGI:2141503]	-2.31261	0.000509005	0.0129999	1.85663	0.652992
ENSMUSG00000032724	Abtb2	6032	ankyrin repeat and BTB (POZ) domain containing 2 [Source:MGI Symbol;Acc:MGI:2139365]	2.71969	0.000511567	0.0130468	1.97694	4.28456
ENSMUSG00000022974	Paxbp1	5508	PAX3 and PAX7 binding protein 1 [Source:MGI Symbol;Acc:MGI:1914617]	1.77905	0.000516378	0.0131112	8.73952	12.3823
ENSMUSG00000106443	Gm42702	4217	predicted gene 42702 [Source:MGI Symbol;Acc:MGI:5662839]	3.05612	0.000516617	0.0131112	1.22482	3.02063
ENSMUSG00000056529	Ptafr	3637	platelet-activating factor receptor [Source:MGI Symbol;Acc:MGI:106066]	13.477	0.000517118	0.0131112	0.0124542	0.152496
ENSMUSG00000038067	Csf3	1413	colony stimulating factor 3 (granulocyte) [Source:MGI Symbol;Acc:MGI:1339751]	232.911	0.000517574	0.0131112	0.105242	21.3425
ENSMUSG00000113015	Gm6296	943	predicted gene 6296 [Source:MGI Symbol;Acc:MGI:3648150]	4.3742	0.000517738	0.0131112	1.90353	6.69749
ENSMUSG00000105933	Gm43260	2430	predicted gene 43260 [Source:MGI Symbol;Acc:MGI:5663397]	4.33754	0.000522225	0.0132062	1.00898	3.51462
ENSMUSG00000024236	Svil	10701	supervillin [Source:MGI Symbol;Acc:MGI:2147319]	1.63702	0.000523463	0.0132189	4.13629	5.41294
ENSMUSG00000113448	Gm7042	384	predicted gene 7042 [Source:MGI Symbol;Acc:MGI:3643634]	242.075	0.000526545	0.0132781	0	2.98302
ENSMUSG00000030718	Ppme1	3100	protein phosphatase methylesterase 1 [Source:MGI Symbol;Acc:MGI:1919840]	1.55759	0.000534717	0.0134653	19.4394	24.406
ENSMUSG00000026121	Sema4c	4593	sema domain, immunoglobulin domain (Ig), transmembrane domain (TM) and short cytoplasmic domain, (semaphorin) 4C [Source:MGI Symbol;Acc:MGI:109252]	2.83063	0.000541522	0.0136176	2.77457	6.25113
ENSMUSG00000025195	Dnmbp	8264	dynamin binding protein [Source:MGI Symbol;Acc:MGI:1917352]	1.67509	0.000542901	0.0136332	12.4777	16.6758
ENSMUSG00000071862	Lrrtm2	6022	leucine rich repeat transmembrane neuronal 2 [Source:MGI Symbol;Acc:MGI:2389174]	14.1789	0.000544963	0.0136659	0.0672595	0.752602
ENSMUSG00000040253	Gbp7	5614	guanylate binding protein 7 [Source:MGI Symbol;Acc:MGI:2444421]	4.34896	0.000545828	0.0136685	0.505402	1.78015
ENSMUSG00000060093	Hist1h4a	539	histone cluster 1, H4a [Source:MGI Symbol;Acc:MGI:2448419]	4.16679	0.00054776	0.0136978	4.8205	16.4649
ENSMUSG00000024219	Anks1	10136	ankyrin repeat and SAM domain containing 1 [Source:MGI Symbol;Acc:MGI:2446180]	1.67529	0.000549032	0.0137105	3.76528	5.06075
ENSMUSG00000074030	Exoc8	4598	exocyst complex component 8 [Source:MGI Symbol;Acc:MGI:2142527]	-1.85029	0.000553312	0.0137951	4.63391	2.00546
ENSMUSG00000021973	Micu2	3084	mitochondrial calcium uptake 2 [Source:MGI Symbol;Acc:MGI:1915764]	-1.62228	0.000553954	0.0137951	21.3722	10.6977
ENSMUSG00000089371	Mir1938	100	microRNA 1938 [Source:MGI Symbol;Acc:MGI:3836976]	12.7422	0.000558515	0.0138716	8.77539	88.1781
ENSMUSG00000052684	Jun	3189	jun proto-oncogene [Source:MGI Symbol;Acc:MGI:96646]	5.77304	0.000558569	0.0138716	63.949	294.743
ENSMUSG00000025762	Larp1b	8366	La ribonucleoprotein domain family, member 1B [Source:MGI Symbol;Acc:MGI:1914604]	1.89314	0.000564928	0.0140102	2.42444	3.6777
ENSMUSG00000105071	Gm43336	4504	predicted gene 43336 [Source:MGI Symbol;Acc:MGI:5663473]	5.0113	0.000566912	0.0140401	0.298718	1.1897
ENSMUSG00000095105	Edaradd	6668	EDAR (ectodysplasin-A receptor)-associated death domain [Source:MGI Symbol;Acc:MGI:1931001]	-3.01301	0.000567755	0.0140416	1.77105	0.467527
ENSMUSG00000018012	Rac3	1293	Rac family small GTPase 3 [Source:MGI Symbol;Acc:MGI:2180784]	3.36102	0.000572598	0.0141419	1.6873	4.56056
ENSMUSG00000022673	Mcm4	3589	minichromosome maintenance complex component 4 [Source:MGI Symbol;Acc:MGI:103199]	4.00272	0.00057846	0.0142671	3.58582	11.6815
ENSMUSG00000071713	Csf2rb	7277	colony stimulating factor 2 receptor, beta, low-affinity (granulocyte-macrophage) [Source:MGI Symbol;Acc:MGI:1339759]	4.80005	0.000580824	0.0143058	0.0313281	0.128925
ENSMUSG00000053560	Ier2	1524	immediate early response 2 [Source:MGI Symbol;Acc:MGI:104815]	13.6627	0.000582577	0.0143293	10.1601	111.542
ENSMUSG00000040435	Ppp1r15a	2937	protein phosphatase 1, regulatory subunit 15A [Source:MGI Symbol;Acc:MGI:1927072]	4.1626	0.000583464	0.0143315	21.7548	73.1934
ENSMUSG00000032220	Myo1e	5704	myosin IE [Source:MGI Symbol;Acc:MGI:106621]	2.12056	0.000584712	0.0143387	2.70023	4.6504
ENSMUSG00000035861	Tmprss11b	4171	transmembrane protease, serine 11B [Source:MGI Symbol;Acc:MGI:2442893]	108.373	0.000585636	0.0143387	0	0.134768
ENSMUSG00000052957	Gas1	2961	growth arrest specific 1 [Source:MGI Symbol;Acc:MGI:95655]	1.70597	0.000586839	0.0143387	13.1713	18.0164
ENSMUSG00000020205	Phlda1	2205	pleckstrin homology like domain, family A, member 1 [Source:MGI Symbol;Acc:MGI:1096880]	4.82898	0.000586946	0.0143387	8.19414	31.5547
ENSMUSG00000069184	Zfp72	4157	zinc finger protein 72 [Source:MGI Symbol;Acc:MGI:3033356]	-9.69066	0.000589659	0.0143854	0.853569	0.0752207
ENSMUSG00000015243	Abca1	10363	ATP-binding cassette, sub-family A (ABC1), member 1 [Source:MGI Symbol;Acc:MGI:99607]	-1.78481	0.000592587	0.0144367	9.48603	4.25485
ENSMUSG00000038533	Cbfa2t2	8650	CBFA2/RUNX1 translocation partner 2 [Source:MGI Symbol;Acc:MGI:1333833]	-1.55617	0.000593367	0.0144367	5.90211	3.05358
ENSMUSG00000041324	Inhba	6390	inhibin beta-A [Source:MGI Symbol;Acc:MGI:96570]	2.44916	0.000597008	0.0145041	27.3419	53.7509
ENSMUSG00000005506	Celf1	8446	CUGBP, Elav-like family member 1 [Source:MGI Symbol;Acc:MGI:1342295]	-1.66017	0.00059775	0.0145041	44.9663	21.7095
ENSMUSG00000052415	Tchh	5823	trichohyalin [Source:MGI Symbol;Acc:MGI:2177944]	4.6428	0.000599187	0.0145194	0.601608	2.24383
ENSMUSG00000036995	Asap3	4225	ArfGAP with SH3 domain, ankyrin repeat and PH domain 3 [Source:MGI Symbol;Acc:MGI:2684986]	2.99399	0.000604181	0.0146207	2.22	5.32347
ENSMUSG00000086564	Cd101	3330	CD101 antigen [Source:MGI Symbol;Acc:MGI:2685862]	104.573	0.000608754	0.0147058	0	0.148115
ENSMUSG00000104639	Gm42939	2205	predicted gene 42939 [Source:MGI Symbol;Acc:MGI:5663076]	6.58572	0.000609335	0.0147058	0.218737	1.18364
ENSMUSG00000106749	Gm43281	2704	predicted gene 43281 [Source:MGI Symbol;Acc:MGI:5663418]	3.47987	0.000612773	0.014769	1.24552	3.45531
ENSMUSG00000036898	Zfp157	8782	zinc finger protein 157 [Source:MGI Symbol;Acc:MGI:1919404]	-2.06961	0.000616163	0.0148302	1.85691	0.72549
ENSMUSG00000029571	Tmem106b	6931	transmembrane protein 106B [Source:MGI Symbol;Acc:MGI:1919150]	-1.58888	0.000616963	0.0148302	11.086	5.67048
ENSMUSG00000022314	Rad21	4232	RAD21 cohesin complex component [Source:MGI Symbol;Acc:MGI:108016]	-1.53787	0.000618131	0.0148384	40.3677	21.2636
ENSMUSG00000067367	Lyar	2401	Ly1 antibody reactive clone [Source:MGI Symbol;Acc:MGI:107470]	1.81655	0.00062408	0.0149497	6.73723	9.91949
ENSMUSG00000104876	Trdc	3865	T cell receptor delta, constant region [Source:MGI Symbol;Acc:MGI:98612]	214.779	0.000624427	0.0149497	0	0.271934
ENSMUSG00000090919	Pabpc4l	5506	poly(A) binding protein, cytoplasmic 4-like [Source:MGI Symbol;Acc:MGI:3643087]	-5.29075	0.000626275	0.014974	0.754244	0.113445
ENSMUSG00000097971	Gm26917	3329	predicted gene, 26917 [Source:MGI Symbol;Acc:MGI:5504032]	2.04276	0.000627871	0.0149922	3133.29	5063.61
ENSMUSG00000050541	Adra1b	3382	adrenergic receptor, alpha 1b [Source:MGI Symbol;Acc:MGI:104774]	3.87325	0.000636207	0.0151711	1.43083	4.43792
ENSMUSG00000066324	Impad1	6543	inositol monophosphatase domain containing 1 [Source:MGI Symbol;Acc:MGI:1915720]	-1.49838	0.000639596	0.0152152	17.4329	9.38538
ENSMUSG00000057933	Gsta2	1177	glutathione S-transferase, alpha 2 (Yc2) [Source:MGI Symbol;Acc:MGI:95863]	454.764	0.00063975	0.0152152	0	1.97523
ENSMUSG00000018920	Cxcl16	3021	chemokine (C-X-C motif) ligand 16 [Source:MGI Symbol;Acc:MGI:1932682]	5.81777	0.000645988	0.0153433	0.561666	2.70525
ENSMUSG00000045903	Npas4	4136	neuronal PAS domain protein 4 [Source:MGI Symbol;Acc:MGI:2664186]	31.106	0.0006486	0.015385	0.0219959	0.613358
ENSMUSG00000002250	Ppard	7514	peroxisome proliferator activator receptor delta [Source:MGI Symbol;Acc:MGI:101884]	1.75837	0.000649688	0.0153905	2.37619	3.38082
ENSMUSG00000071253	Slc25a16	4799	solute carrier family 25 (mitochondrial carrier, Graves disease autoantigen), member 16 [Source:MGI Symbol;Acc:MGI:1920382]	-2.36209	0.000651494	0.015413	3.03724	1.03648
ENSMUSG00000020961	Ston2	12448	stonin 2 [Source:MGI Symbol;Acc:MGI:1918272]	1.68755	0.000652764	0.0154227	8.42273	11.3419
ENSMUSG00000004151	Etv1	13296	ets variant 1 [Source:MGI Symbol;Acc:MGI:99254]	-1.75236	0.000654383	0.0154407	1.659	0.766079
ENSMUSG00000115009	G930009F23Rik	2819	RIKEN cDNA G930009F23 gene [Source:MGI Symbol;Acc:MGI:3642701]	7.28079	0.000655634	0.0154499	0.0639771	0.386106
ENSMUSG00000046879	Irgm1	5810	immunity-related GTPase family M member 1 [Source:MGI Symbol;Acc:MGI:107567]	17.212	0.000657954	0.0154843	1.16563	16.1803
ENSMUSG00000029392	Rilpl1	2463	Rab interacting lysosomal protein-like 1 [Source:MGI Symbol;Acc:MGI:1922945]	-1.53644	0.00066052	0.0155244	23.7627	12.4889
ENSMUSG00000021733	Slc4a7	15201	solute carrier family 4, sodium bicarbonate cotransporter, member 7 [Source:MGI Symbol;Acc:MGI:2443878]	1.69518	0.000661907	0.0155367	5.15034	6.99673
ENSMUSG00000116884	C130040N14Rik	1111	RIKEN cDNA C130040N14 gene [Source:MGI Symbol;Acc:MGI:3588257]	22.1874	0.000667041	0.015635	0.0958683	1.8128
ENSMUSG00000021025	Nfkbia	1610	nuclear factor of kappa light polypeptide gene enhancer in B cells inhibitor, alpha [Source:MGI Symbol;Acc:MGI:104741]	3.56201	0.000667834	0.015635	57.6989	167.999
ENSMUSG00000057497	Fam136a	2702	family with sequence similarity 136, member A [Source:MGI Symbol;Acc:MGI:1913738]	-2.17218	0.000668907	0.0156397	5.28699	1.9924
ENSMUSG00000039137	Whrn	7337	whirlin [Source:MGI Symbol;Acc:MGI:2682003]	1.78133	0.000671014	0.0156686	5.27001	7.50425
ENSMUSG00000028799	Zfp362	3052	zinc finger protein 362 [Source:MGI Symbol;Acc:MGI:2652839]	-1.75026	0.00067213	0.0156743	12.3164	5.61689
ENSMUSG00000053797	Krt16	1565	keratin 16 [Source:MGI Symbol;Acc:MGI:96690]	135.361	0.000673242	0.0156799	0	0.45157
ENSMUSG00000054362	Lexm	1673	lymphocyte expansion molecule [Source:MGI Symbol;Acc:MGI:2681853]	263.477	0.000678346	0.0157783	0	0.789327
ENSMUSG00000110622	Iqcn	4584	IQ motif containing N [Source:MGI Symbol;Acc:MGI:3708784]	67.6842	0.00068164	0.0158345	0.160025	8.66129
ENSMUSG00000053475	Tnfaip6	1710	tumor necrosis factor alpha induced protein 6 [Source:MGI Symbol;Acc:MGI:1195266]	27.2011	0.000686115	0.0159179	0.0705857	1.59668
ENSMUSG00000070942	Il1rl2	6812	interleukin 1 receptor-like 2 [Source:MGI Symbol;Acc:MGI:1913107]	195.831	0.000687647	0.0159328	0	0.141387
ENSMUSG00000022367	Has2	4237	hyaluronan synthase 2 [Source:MGI Symbol;Acc:MGI:107821]	81.5243	0.000694547	0.016072	0	0.0918039
ENSMUSG00000047342	Zfp286	7991	zinc finger protein 286 [Source:MGI Symbol;Acc:MGI:2384758]	-3.18529	0.000696952	0.016093	1.08891	0.276007
ENSMUSG00000027375	Mal	2778	myelin and lymphocyte protein, T cell differentiation protein [Source:MGI Symbol;Acc:MGI:892970]	5.40179	0.000697243	0.016093	0.641512	2.86743
ENSMUSG00000027580	Helz2	11529	helicase with zinc finger 2, transcriptional coactivator [Source:MGI Symbol;Acc:MGI:2385169]	3.60723	0.000702202	0.0161867	1.33697	3.87773
ENSMUSG00000022177	Haus4	2378	HAUS augmin-like complex, subunit 4 [Source:MGI Symbol;Acc:MGI:1261794]	-2.71574	0.000707612	0.0162905	4.44449	1.34098
ENSMUSG00000032231	Anxa2	3731	annexin A2 [Source:MGI Symbol;Acc:MGI:88246]	1.90072	0.000711368	0.016356	26.9568	41.2331
ENSMUSG00000040124	Gorab	2855	golgin, RAB6-interacting [Source:MGI Symbol;Acc:MGI:2138271]	-1.94164	0.000715054	0.0164198	6.53416	2.72202
ENSMUSG00000022512	Cldn1	4841	claudin 1 [Source:MGI Symbol;Acc:MGI:1276109]	2.99336	0.00071747	0.0164542	2.2173	5.43924
ENSMUSG00000030020	Prickle2	8631	prickle planar cell polarity protein 2 [Source:MGI Symbol;Acc:MGI:1925144]	1.8829	0.000725732	0.0166225	6.05951	9.20035
ENSMUSG00000040102	Klhl42	6449	kelch-like 42 [Source:MGI Symbol;Acc:MGI:2444786]	-1.89971	0.000726665	0.0166227	2.92826	1.24443
ENSMUSG00000059475	Zfp426	4888	zinc finger protein 426 [Source:MGI Symbol;Acc:MGI:1920248]	-2.11303	0.00072884	0.0166513	3.43408	1.31861
ENSMUSG00000097451	Rian	31981	RNA imprinted and accumulated in nucleus [Source:MGI Symbol;Acc:MGI:1922995]	2.28586	0.000729946	0.0166554	0.386145	0.70582
ENSMUSG00000097750	Gm4673	4452	predicted gene 4673 [Source:MGI Symbol;Acc:MGI:3782854]	-2.62701	0.00073092	0.0166565	2.77812	0.856218
ENSMUSG00000032577	Mapkapk3	5542	mitogen-activated protein kinase-activated protein kinase 3 [Source:MGI Symbol;Acc:MGI:2143163]	2.43233	0.000732437	0.0166618	0.775022	1.51704
ENSMUSG00000028423	Nfx1	8564	nuclear transcription factor, X-box binding 1 [Source:MGI Symbol;Acc:MGI:1921414]	-1.51496	0.000733009	0.0166618	6.94117	3.71668
ENSMUSG00000000982	Ccl3	766	chemokine (C-C motif) ligand 3 [Source:MGI Symbol;Acc:MGI:98260]	21.5008	0.000738482	0.016765	0.139354	2.57749
ENSMUSG00000022463	Srebf2	7184	sterol regulatory element binding factor 2 [Source:MGI Symbol;Acc:MGI:107585]	1.56049	0.000741002	0.016801	18.1326	22.7275
ENSMUSG00000019866	Crybg1	7799	crystallin beta-gamma domain containing 1 [Source:MGI Symbol;Acc:MGI:109544]	3.44004	0.000742007	0.0168026	5.90065	16.0357
ENSMUSG00000037405	Icam1	4360	intercellular adhesion molecule 1 [Source:MGI Symbol;Acc:MGI:96392]	7.16699	0.000745415	0.0168429	3.01229	17.4304
ENSMUSG00000043572	Pars2	3094	prolyl-tRNA synthetase (mitochondrial)(putative) [Source:MGI Symbol;Acc:MGI:2386296]	-4.32755	0.000745659	0.0168429	1.37726	0.251236
ENSMUSG00000042178	Armc5	3849	armadillo repeat containing 5 [Source:MGI Symbol;Acc:MGI:2384586]	-1.81411	0.000747088	0.016854	8.8329	3.96684
ENSMUSG00000073274	Gm14636	7009	predicted gene 14636 [Source:MGI Symbol;Acc:MGI:3641976]	5.6718	0.000752994	0.0169454	0.377054	1.71136
ENSMUSG00000052727	Map1b	15846	microtubule-associated protein 1B [Source:MGI Symbol;Acc:MGI:1306778]	1.61179	0.000753025	0.0169454	38.4801	50.061
ENSMUSG00000103364	Gm38157	1698	predicted gene, 38157 [Source:MGI Symbol;Acc:MGI:5611385]	4.01515	0.000756696	0.0170067	2.46676	7.76074
ENSMUSG00000037822	Smim14	15976	small integral membrane protein 14 [Source:MGI Symbol;Acc:MGI:1915802]	-1.61153	0.000758997	0.0170372	3.63268	1.82862
ENSMUSG00000028060	Khdc4	6720	KH domain containing 4, pre-mRNA splicing factor [Source:MGI Symbol;Acc:MGI:1921450]	1.57462	0.000762166	0.017087	6.34571	8.0824
ENSMUSG00000025880	Smad7	4521	SMAD family member 7 [Source:MGI Symbol;Acc:MGI:1100518]	1.78677	0.000767923	0.0171946	10.1211	14.545
ENSMUSG00000035495	Tstd2	5570	thiosulfate sulfurtransferase (rhodanese)-like domain containing 2 [Source:MGI Symbol;Acc:MGI:3039624]	-1.91897	0.000770303	0.0172264	5.05575	2.11302
ENSMUSG00000032038	St3gal4	2923	ST3 beta-galactoside alpha-2,3-sialyltransferase 4 [Source:MGI Symbol;Acc:MGI:1316743]	1.98271	0.000773701	0.0172809	2.00823	3.21481
ENSMUSG00000003526	Prodh	7797	proline dehydrogenase [Source:MGI Symbol;Acc:MGI:97770]	-1.74688	0.000778254	0.017361	5.95141	2.7467
ENSMUSG00000017002	Slpi	1180	secretory leukocyte peptidase inhibitor [Source:MGI Symbol;Acc:MGI:109297]	14.0377	0.00078193	0.0174004	0.0896553	1.03093
ENSMUSG00000015837	Sqstm1	3356	sequestosome 1 [Source:MGI Symbol;Acc:MGI:107931]	1.86478	0.000781953	0.0174004	78.8706	119.367
ENSMUSG00000070327	Rnf213	16888	ring finger protein 213 [Source:MGI Symbol;Acc:MGI:1289196]	2.14616	0.000786845	0.0174876	4.37461	7.58582
ENSMUSG00000035711	Dok3	2459	docking protein 3 [Source:MGI Symbol;Acc:MGI:1351490]	4.37817	0.000788514	0.0175031	0.245045	0.879456
ENSMUSG00000037820	Tgm2	4608	transglutaminase 2, C polypeptide [Source:MGI Symbol;Acc:MGI:98731]	2.44377	0.000791035	0.0175374	0.836639	1.67035
ENSMUSG00000072762	4930522L14Rik	2409	RIKEN cDNA 4930522L14 gene [Source:MGI Symbol;Acc:MGI:1925270]	-6.7143	0.000797586	0.0176477	1.19002	0.139882
ENSMUSG00000047501	Cldn4	1816	claudin 4 [Source:MGI Symbol;Acc:MGI:1313314]	13.8198	0.000797976	0.0176477	0.0755367	0.891251
ENSMUSG00000041837	Pdcd7	2498	programmed cell death 7 [Source:MGI Symbol;Acc:MGI:1859170]	1.72879	0.000803922	0.0177574	17.2372	23.7405
ENSMUSG00000020549	Elac2	3479	elaC ribonuclease Z 2 [Source:MGI Symbol;Acc:MGI:1890496]	1.90371	0.000806872	0.0177847	4.48097	6.79743
ENSMUSG00000070544	Top1	10426	topoisomerase (DNA) I [Source:MGI Symbol;Acc:MGI:98788]	1.55655	0.000807138	0.0177847	11.9092	14.9899
ENSMUSG00000097418	Mir155hg	1433	Mir155 host gene (non-protein coding) [Source:MGI Symbol;Acc:MGI:5477161]	13.5029	0.000809206	0.0178085	0.168764	1.96637
ENSMUSG00000021374	Nup153	7017	nucleoporin 153 [Source:MGI Symbol;Acc:MGI:2385621]	1.61254	0.000810788	0.0178215	8.46407	11.0186
ENSMUSG00000027351	Spred1	6784	sprouty protein with EVH-1 domain 1, related sequence [Source:MGI Symbol;Acc:MGI:2150016]	1.56474	0.0008134	0.0178571	8.80315	11.1528
ENSMUSG00000049401	Ogfr	2580	opioid growth factor receptor [Source:MGI Symbol;Acc:MGI:1919325]	1.67959	0.000818208	0.0179407	12.8586	17.3065
ENSMUSG00000031853	Map3k21	5693	mitogen-activated protein kinase kinase kinase 21 [Source:MGI Symbol;Acc:MGI:2385307]	-2.33455	0.000825212	0.0180722	4.20444	1.46299
ENSMUSG00000053175	Bcl3	2475	B cell leukemia/lymphoma 3 [Source:MGI Symbol;Acc:MGI:88140]	5.35028	0.000828936	0.0180994	1.0638	4.62292
ENSMUSG00000013089	Etv5	4103	ets variant 5 [Source:MGI Symbol;Acc:MGI:1096867]	-1.45699	0.000829032	0.0180994	15.6273	8.65483
ENSMUSG00000032000	Birc3	5009	baculoviral IAP repeat-containing 3 [Source:MGI Symbol;Acc:MGI:1197007]	7.61576	0.000829473	0.0180994	1.90243	11.7302
ENSMUSG00000106432	Gm43259	3277	predicted gene 43259 [Source:MGI Symbol;Acc:MGI:5663396]	3.64704	0.000832936	0.018153	1.01908	2.94943
ENSMUSG00000075701	Selenos	1477	selenoprotein S [Source:MGI Symbol;Acc:MGI:95994]	-1.60916	0.000834863	0.0181729	26.9522	13.4428
ENSMUSG00000032845	Alpk2	7960	alpha-kinase 2 [Source:MGI Symbol;Acc:MGI:2449492]	4.5532	0.000836463	0.0181857	0.405452	1.47623
ENSMUSG00000075324	Fign	9969	fidgetin [Source:MGI Symbol;Acc:MGI:1890647]	-1.95727	0.000837877	0.0181945	6.66192	2.70259
ENSMUSG00000053007	Creb5	25021	cAMP responsive element binding protein 5 [Source:MGI Symbol;Acc:MGI:2443973]	2.57218	0.000844247	0.0183107	0.892907	1.8493
ENSMUSG00000042354	Gnl3	6101	guanine nucleotide binding protein-like 3 (nucleolar) [Source:MGI Symbol;Acc:MGI:1353651]	1.84944	0.000847125	0.018351	2.82986	4.21293
ENSMUSG00000042688	Mapk6	6675	mitogen-activated protein kinase 6 [Source:MGI Symbol;Acc:MGI:1354946]	2.2617	0.00084855	0.0183566	8.20782	15.0552
ENSMUSG00000085399	Foxd2os	3224	forkhead box D2, opposite strand [Source:MGI Symbol;Acc:MGI:2444065]	-2.41389	0.000849428	0.0183566	4.50613	1.49512
ENSMUSG00000027611	Procr	2031	protein C receptor, endothelial [Source:MGI Symbol;Acc:MGI:104596]	15.9207	0.000856621	0.0184851	0.347115	4.27067
ENSMUSG00000030774	Pak1	3943	p21 (RAC1) activated kinase 1 [Source:MGI Symbol;Acc:MGI:1339975]	1.81895	0.000857428	0.0184851	2.25423	3.31166
ENSMUSG00000054808	Actn4	6127	actinin alpha 4 [Source:MGI Symbol;Acc:MGI:1890773]	1.52882	0.000864177	0.0186083	44.9727	55.4818
ENSMUSG00000040151	Hs2st1	8209	heparan sulfate 2-O-sulfotransferase 1 [Source:MGI Symbol;Acc:MGI:1346049]	1.59039	0.000867928	0.0186667	5.99533	7.63835
ENSMUSG00000047562	Mmp10	1722	matrix metallopeptidase 10 [Source:MGI Symbol;Acc:MGI:97007]	157.688	0.000869858	0.0186858	0	0.449638
ENSMUSG00000037974	Muc5ac	10752	mucin 5, subtypes A and C, tracheobronchial/gastric [Source:MGI Symbol;Acc:MGI:104697]	24.8423	0.000871549	0.0186998	0.0383237	0.768769
ENSMUSG00000090582	Gm17024	634	predicted gene 17024 [Source:MGI Symbol;Acc:MGI:4937851]	8.59249	0.000878957	0.0188357	5.40817	37.2292
ENSMUSG00000029552	Tes	6835	testis derived transcript [Source:MGI Symbol;Acc:MGI:105081]	3.57767	0.000879977	0.0188357	0.294266	0.864044
ENSMUSG00000020427	Igfbp3	3130	insulin-like growth factor binding protein 3 [Source:MGI Symbol;Acc:MGI:96438]	4.79047	0.000884096	0.0188975	0.333857	1.32431
ENSMUSG00000035840	Lysmd3	4250	LysM, putative peptidoglycan-binding, domain containing 3 [Source:MGI Symbol;Acc:MGI:1915906]	1.98816	0.000884964	0.0188975	3.17133	5.0939
ENSMUSG00000072844	G530011O06Rik	2380	RIKEN cDNA G530011O06 gene [Source:MGI Symbol;Acc:MGI:3603513]	12.6803	0.000890901	0.0190017	0.214442	2.22891
ENSMUSG00000030587	2200002D01Rik	1564	RIKEN cDNA 2200002D01 gene [Source:MGI Symbol;Acc:MGI:1919525]	2.82952	0.000894011	0.0190413	1.68372	3.84148
ENSMUSG00000031805	Jak3	5352	Janus kinase 3 [Source:MGI Symbol;Acc:MGI:99928]	2.45071	0.00089488	0.0190413	0.772799	1.51664
ENSMUSG00000030560	Ctsc	5808	cathepsin C [Source:MGI Symbol;Acc:MGI:109553]	1.79878	0.000900398	0.0191361	3.54031	5.11178
ENSMUSG00000037013	Ss18	10193	SS18, nBAF chromatin remodeling complex subunit [Source:MGI Symbol;Acc:MGI:107708]	-1.69785	0.00090191	0.0191364	7.54375	3.61115
ENSMUSG00000108614	2610306O10Rik	612	RIKEN cDNA 2610306O10 gene [Source:MGI Symbol;Acc:MGI:1917710]	4.76051	0.00090254	0.0191364	2.12298	8.22924
ENSMUSG00000041712	Ubr7	3261	ubiquitin protein ligase E3 component n-recognin 7 (putative) [Source:MGI Symbol;Acc:MGI:1913872]	-1.71772	0.000906926	0.0192068	7.42697	3.49434
ENSMUSG00000049232	Tigd2	3007	tigger transposable element derived 2 [Source:MGI Symbol;Acc:MGI:1915390]	-2.31947	0.000915482	0.0193651	5.77449	2.04466
ENSMUSG00000078908	Mon1b	5120	MON1 homolog B, secretory traffciking associated [Source:MGI Symbol;Acc:MGI:1923231]	-2.00122	0.000919059	0.019418	7.99091	3.26915
ENSMUSG00000019826	Zbtb24	5123	zinc finger and BTB domain containing 24 [Source:MGI Symbol;Acc:MGI:3039618]	-1.98786	0.000925729	0.0195359	3.79593	1.54264
ENSMUSG00000049532	Sall2	5433	spalt like transcription factor 2 [Source:MGI Symbol;Acc:MGI:1354373]	-1.83447	0.000939045	0.0197937	5.31817	2.36437
ENSMUSG00000031161	Hdac6	5817	histone deacetylase 6 [Source:MGI Symbol;Acc:MGI:1333752]	1.64125	0.000942445	0.0198421	3.68997	4.86345
ENSMUSG00000024778	Fas	2062	Fas (TNF receptor superfamily member 6) [Source:MGI Symbol;Acc:MGI:95484]	3.31269	0.000949811	0.0199531	6.40285	16.7922
ENSMUSG00000029012	Orc5	6166	origin recognition complex, subunit 5 [Source:MGI Symbol;Acc:MGI:1347044]	-2.41463	0.000949936	0.0199531	1.49279	0.489093
ENSMUSG00000108004	Gm44080	2214	predicted gene, 44080 [Source:MGI Symbol;Acc:MGI:5690472]	14.1381	0.000952641	0.0199739	0.088178	1.00617
ENSMUSG00000005893	Nr2c2	14935	nuclear receptor subfamily 2, group C, member 2 [Source:MGI Symbol;Acc:MGI:1352466]	-1.6023	0.000953147	0.0199739	5.56006	2.80062
ENSMUSG00000076436	Oxct2a	1760	3-oxoacid CoA transferase 2A [Source:MGI Symbol;Acc:MGI:1891061]	204.51	0.000958759	0.0200681	0	0.559255
ENSMUSG00000044066	Cep68	5865	centrosomal protein 68 [Source:MGI Symbol;Acc:MGI:2667663]	-1.66158	0.000961469	0.0201014	5.15199	2.50791
ENSMUSG00000024570	Rbfa	1477	ribosome binding factor A [Source:MGI Symbol;Acc:MGI:1915981]	-2.08808	0.000964052	0.0201109	9.04454	3.50292
ENSMUSG00000022565	Plec	18113	plectin [Source:MGI Symbol;Acc:MGI:1277961]	1.87259	0.000964159	0.0201109	127.168	188.633
ENSMUSG00000022999	Lmbr1l	4338	limb region 1 like [Source:MGI Symbol;Acc:MGI:1289247]	2.31269	0.000968341	0.0201747	3.70725	6.78858
ENSMUSG00000047735	Samd9l	5427	sterile alpha motif domain containing 9-like [Source:MGI Symbol;Acc:MGI:1343184]	2.8051	0.000971687	0.020221	1.30861	2.99677
ENSMUSG00000033323	Ctdp1	3910	CTD (carboxy-terminal domain, RNA polymerase II, polypeptide A) phosphatase, subunit 1 [Source:MGI Symbol;Acc:MGI:1926953]	1.70833	0.000981304	0.0203975	7.11857	9.85342
ENSMUSG00000043298	Smco3	2298	single-pass membrane protein with coiled-coil domains 3 [Source:MGI Symbol;Acc:MGI:2443451]	-2.76172	0.000983466	0.0204188	6.71058	1.97795
ENSMUSG00000106354	Gm42607	3393	predicted gene 42607 [Source:MGI Symbol;Acc:MGI:5662744]	14.7785	0.000989163	0.0205134	0.0313196	0.413486
ENSMUSG00000038151	Prdm1	5579	PR domain containing 1, with ZNF domain [Source:MGI Symbol;Acc:MGI:99655]	5.01282	0.00100021	0.0207185	0.163378	0.683955
ENSMUSG00000022003	Slc25a30	4571	solute carrier family 25, member 30 [Source:MGI Symbol;Acc:MGI:1914804]	2.29424	0.00100136	0.0207185	0.783511	1.45472
ENSMUSG00000021720	Rnf180	5579	ring finger protein 180 [Source:MGI Symbol;Acc:MGI:1919066]	2.07671	0.00100304	0.0207295	1.90659	3.16577
ENSMUSG00000035851	Ythdc1	13651	YTH domain containing 1 [Source:MGI Symbol;Acc:MGI:2443713]	1.42394	0.00100733	0.0207942	8.15282	9.33809
ENSMUSG00000016984	Etaa1	4185	Ewing tumor-associated antigen 1 [Source:MGI Symbol;Acc:MGI:1915395]	-2.23867	0.00101942	0.0210197	4.9412	1.77401
ENSMUSG00000026073	Il1r2	1908	interleukin 1 receptor, type II [Source:MGI Symbol;Acc:MGI:96546]	42.6743	0.00102128	0.0210339	0	0.106335
ENSMUSG00000025089	Gfra1	5476	glial cell line derived neurotrophic factor family receptor alpha 1 [Source:MGI Symbol;Acc:MGI:1100842]	4.01966	0.00102634	0.0211078	1.62824	5.14806
ENSMUSG00000047832	Cdca4	4198	cell division cycle associated 4 [Source:MGI Symbol;Acc:MGI:1919213]	2.72669	0.00102722	0.0211078	1.30759	2.86768
ENSMUSG00000049649	Gpr3	2734	G-protein coupled receptor 3 [Source:MGI Symbol;Acc:MGI:101908]	9.35259	0.00102946	0.0211299	0.223042	1.80482
ENSMUSG00000022750	Klhl22	5234	kelch-like 22 [Source:MGI Symbol;Acc:MGI:1337995]	-2.08735	0.00103086	0.0211344	6.32042	2.43333
ENSMUSG00000039982	Dtx4	5226	deltex 4, E3 ubiquitin ligase [Source:MGI Symbol;Acc:MGI:2672905]	-1.56675	0.00103286	0.0211437	11.8387	6.05964
ENSMUSG00000037242	Clic4	6572	chloride intracellular channel 4 (mitochondrial) [Source:MGI Symbol;Acc:MGI:1352754]	4.62597	0.00103367	0.0211437	3.00212	11.3255
ENSMUSG00000022765	Snap29	3447	synaptosomal-associated protein 29 [Source:MGI Symbol;Acc:MGI:1914724]	-1.71768	0.00103915	0.0212318	5.61125	2.65463
ENSMUSG00000078779	Zfp59	3437	zinc finger protein 59 [Source:MGI Symbol;Acc:MGI:99206]	-2.90621	0.0010407	0.0212392	1.73505	0.487017
ENSMUSG00000032058	Ppp2r1b	6449	protein phosphatase 2, regulatory subunit A, beta [Source:MGI Symbol;Acc:MGI:1920949]	1.839	0.00104354	0.0212561	2.44975	3.61823
ENSMUSG00000010067	Rassf1	5845	Ras association (RalGDS/AF-6) domain family member 1 [Source:MGI Symbol;Acc:MGI:1928386]	2.07046	0.00104389	0.0212561	2.25713	3.73076
ENSMUSG00000031242	2610002M06Rik	6337	RIKEN cDNA 2610002M06 gene [Source:MGI Symbol;Acc:MGI:1914278]	-2.48457	0.00104616	0.0212782	1.79972	0.592548
ENSMUSG00000053113	Socs3	2891	suppressor of cytokine signaling 3 [Source:MGI Symbol;Acc:MGI:1201791]	9.08523	0.00104829	0.0212974	19.2083	138.176
ENSMUSG00000022858	Tra2b	9235	transformer 2 beta [Source:MGI Symbol;Acc:MGI:106016]	1.54535	0.00105152	0.0213365	11.7768	14.6968
ENSMUSG00000085609	1700016P03Rik	863	RIKEN cDNA 1700016P03 gene [Source:MGI Symbol;Acc:MGI:1922792]	35.4894	0.00105258	0.0213365	0.0525273	1.67463
ENSMUSG00000030748	Il4ra	6002	interleukin 4 receptor, alpha [Source:MGI Symbol;Acc:MGI:105367]	1.81857	0.00106695	0.0216033	2.2344	3.31015
ENSMUSG00000041347	Bdkrb1	1435	bradykinin receptor, beta 1 [Source:MGI Symbol;Acc:MGI:88144]	109.07	0.00106893	0.0216191	0	0.383668
ENSMUSG00000019943	Atp2b1	15218	ATPase, Ca++ transporting, plasma membrane 1 [Source:MGI Symbol;Acc:MGI:104653]	1.9243	0.0010736	0.0216892	3.61863	5.61111
ENSMUSG00000033684	Qsox1	8291	quiescin Q6 sulfhydryl oxidase 1 [Source:MGI Symbol;Acc:MGI:1330818]	1.58825	0.00108213	0.0218368	4.60833	5.88637
ENSMUSG00000037933	Bicd2	6316	BICD cargo adaptor 2 [Source:MGI Symbol;Acc:MGI:1924145]	1.64323	0.00108335	0.021837	6.81165	9.10246
ENSMUSG00000040659	Efhd2	2381	EF hand domain containing 2 [Source:MGI Symbol;Acc:MGI:106504]	3.40166	0.00109348	0.0219869	25.4782	70.9144
ENSMUSG00000079065	BC005561	5409	cDNA sequence BC005561 [Source:MGI Symbol;Acc:MGI:3040669]	2.05289	0.00109366	0.0219869	9.32555	15.1066
ENSMUSG00000051435	Fhad1	6141	forkhead-associated (FHA) phosphopeptide binding domain 1 [Source:MGI Symbol;Acc:MGI:1920323]	3.42228	0.00109445	0.0219869	0.667955	1.8563
ENSMUSG00000004885	Crabp2	1322	cellular retinoic acid binding protein II [Source:MGI Symbol;Acc:MGI:88491]	8.09302	0.00110732	0.0222205	0.796058	5.19818
ENSMUSG00000069917	Hba-a2	667	hemoglobin alpha, adult chain 2 [Source:MGI Symbol;Acc:MGI:96016]	7.09527	0.00110993	0.0222481	8.14109	47.9942
ENSMUSG00000105846	Gm43258	1950	predicted gene 43258 [Source:MGI Symbol;Acc:MGI:5663395]	2.91276	0.00111607	0.0223462	2.06522	4.81938
ENSMUSG00000026641	Usf1	2806	upstream transcription factor 1 [Source:MGI Symbol;Acc:MGI:99542]	-1.8363	0.00111845	0.0223691	7.95148	3.45384
ENSMUSG00000029438	Bcl7a	9490	B cell CLL/lymphoma 7A [Source:MGI Symbol;Acc:MGI:1924295]	-1.98286	0.00112044	0.0223836	4.11021	1.65988
ENSMUSG00000006498	Ptbp1	4740	polypyrimidine tract binding protein 1 [Source:MGI Symbol;Acc:MGI:97791]	1.57774	0.00112167	0.0223836	24.1152	30.7159
ENSMUSG00000034551	Hdx	9534	highly divergent homeobox [Source:MGI Symbol;Acc:MGI:2685226]	2.9589	0.00113289	0.0225825	0.893591	2.12423
ENSMUSG00000061286	Exosc5	6268	exosome component 5 [Source:MGI Symbol;Acc:MGI:107889]	-2.37603	0.00113587	0.0226168	1.71178	0.577371
ENSMUSG00000026869	Psmd5	7230	proteasome (prosome, macropain) 26S subunit, non-ATPase, 5 [Source:MGI Symbol;Acc:MGI:1914248]	-1.72682	0.00113862	0.0226464	4.45803	2.08189
ENSMUSG00000042197	Zfp451	15839	zinc finger protein 451 [Source:MGI Symbol;Acc:MGI:2137896]	1.53585	0.00114494	0.022747	3.94196	4.89056
ENSMUSG00000047798	Cd300lf	5149	CD300 molecule like family member F [Source:MGI Symbol;Acc:MGI:2442359]	22.9828	0.00115603	0.022942	0.00584631	0.130283
ENSMUSG00000030539	Sema4b	5645	sema domain, immunoglobulin domain (Ig), transmembrane domain (TM) and short cytoplasmic domain, (semaphorin) 4B [Source:MGI Symbol;Acc:MGI:107559]	-1.58162	0.00116701	0.0231191	9.15262	4.66882
ENSMUSG00000038400	Pmepa1	4913	prostate transmembrane protein, androgen induced 1 [Source:MGI Symbol;Acc:MGI:1929600]	2.71189	0.00116753	0.0231191	10.5255	22.6433
ENSMUSG00000008136	Fhl2	1897	four and a half LIM domains 2 [Source:MGI Symbol;Acc:MGI:1338762]	6.15362	0.00117014	0.0231362	0.246596	1.26476
ENSMUSG00000004085	Map3k20	10175	mitogen-activated protein kinase kinase kinase 20 [Source:MGI Symbol;Acc:MGI:2443258]	-1.72254	0.00117096	0.0231362	6.10721	2.88844
ENSMUSG00000103808	Gm37060	2397	predicted gene, 37060 [Source:MGI Symbol;Acc:MGI:5610288]	4.7876	0.00117593	0.0232081	0.306398	1.22278
ENSMUSG00000022867	Usp25	5411	ubiquitin specific peptidase 25 [Source:MGI Symbol;Acc:MGI:1353655]	1.53086	0.00117719	0.0232081	15.399	18.8432
ENSMUSG00000044452	Zfp507	8231	zinc finger protein 507 [Source:MGI Symbol;Acc:MGI:1916378]	-1.63407	0.00118125	0.0232627	4.57079	2.25945
ENSMUSG00000044807	Zfp354c	5596	zinc finger protein 354C [Source:MGI Symbol;Acc:MGI:1353621]	-2.02829	0.0011852	0.0233149	3.68166	1.47967
ENSMUSG00000031669	Gins3	2709	GINS complex subunit 3 (Psf3 homolog) [Source:MGI Symbol;Acc:MGI:1926083]	-5.87632	0.00118829	0.0233503	0.767327	0.110047
ENSMUSG00000027613	Eif6	2702	eukaryotic translation initiation factor 6 [Source:MGI Symbol;Acc:MGI:1196288]	1.58178	0.00119285	0.0234071	14.5968	18.6617
ENSMUSG00000055491	Pprc1	6284	peroxisome proliferative activated receptor, gamma, coactivator-related 1 [Source:MGI Symbol;Acc:MGI:2385096]	2.00627	0.00119393	0.0234071	6.33506	10.1185
ENSMUSG00000025465	Echs1	8286	enoyl Coenzyme A hydratase, short chain, 1, mitochondrial [Source:MGI Symbol;Acc:MGI:2136460]	-2.00129	0.00119509	0.0234071	2.77655	1.13876
ENSMUSG00000036160	Surf6	4071	surfeit gene 6 [Source:MGI Symbol;Acc:MGI:98447]	1.68407	0.00119833	0.0234429	5.45409	7.36794
ENSMUSG00000019989	Enpp3	6017	ectonucleotide pyrophosphatase/phosphodiesterase 3 [Source:MGI Symbol;Acc:MGI:2143702]	671.996	0.00119953	0.0234429	0	0.540957
ENSMUSG00000022144	Gdnf	3674	glial cell line derived neurotrophic factor [Source:MGI Symbol;Acc:MGI:107430]	14.4029	0.00120225	0.0234707	0.114065	1.34088
ENSMUSG00000058624	Gda	6235	guanine deaminase [Source:MGI Symbol;Acc:MGI:95678]	3.86994	0.00120411	0.0234815	0.0822624	0.263965
ENSMUSG00000037295	Ldlrap1	7010	low density lipoprotein receptor adaptor protein 1 [Source:MGI Symbol;Acc:MGI:2140175]	-1.59184	0.00120753	0.0235226	5.99106	3.02233
ENSMUSG00000043259	Fam13c	8263	family with sequence similarity 13, member C [Source:MGI Symbol;Acc:MGI:1918971]	2.46819	0.00122161	0.0237711	0.990225	1.98513
ENSMUSG00000064345	mt-Nd2	1038	mitochondrially encoded NADH dehydrogenase 2 [Source:MGI Symbol;Acc:MGI:102500]	1.67305	0.00123503	0.0239811	600.723	806.984
ENSMUSG00000041515	Irf8	7055	interferon regulatory factor 8 [Source:MGI Symbol;Acc:MGI:96395]	2.42281	0.00123506	0.0239811	0.837852	1.63078
ENSMUSG00000020271	Fbxw11	4327	F-box and WD-40 domain protein 11 [Source:MGI Symbol;Acc:MGI:2144023]	1.51877	0.00123857	0.0240197	14.7014	18.0755
ENSMUSG00000033730	Egr3	4406	early growth response 3 [Source:MGI Symbol;Acc:MGI:1306780]	13.0946	0.00123973	0.0240197	1.25962	13.4003
ENSMUSG00000019518	Ap4m1	5361	adaptor-related protein complex AP-4, mu 1 [Source:MGI Symbol;Acc:MGI:1337063]	-2.18544	0.00124733	0.024141	2.4536	0.891167
ENSMUSG00000034731	Dgkh	16975	diacylglycerol kinase, eta [Source:MGI Symbol;Acc:MGI:2444188]	2.92982	0.00125162	0.0241934	0.950949	2.25672
ENSMUSG00000090626	Tex9	8798	testis expressed gene 9 [Source:MGI Symbol;Acc:MGI:1201610]	-2.25662	0.00125273	0.0241934	5.84247	2.07427
ENSMUSG00000034522	Zfp395	4733	zinc finger protein 395 [Source:MGI Symbol;Acc:MGI:2682318]	-1.47535	0.00125824	0.0242739	14.8078	8.10946
ENSMUSG00000037148	Arhgap10	3084	Rho GTPase activating protein 10 [Source:MGI Symbol;Acc:MGI:1925764]	2.59526	0.00126471	0.0243725	4.47276	9.40369
ENSMUSG00000069919	Hba-a1	812	hemoglobin alpha, adult chain 1 [Source:MGI Symbol;Acc:MGI:96015]	8.11365	0.00126744	0.0243988	2.37123	16.149
ENSMUSG00000071281	Zfp65	4195	zinc finger protein 65 [Source:MGI Symbol;Acc:MGI:107769]	-3.45756	0.00127074	0.0244362	1.24679	0.298677
ENSMUSG00000022151	Ttc33	2163	tetratricopeptide repeat domain 33 [Source:MGI Symbol;Acc:MGI:1914765]	-1.87818	0.00127647	0.0245202	9.56701	4.09382
ENSMUSG00000034472	Rasd2	3176	RASD family, member 2 [Source:MGI Symbol;Acc:MGI:1922391]	3.91879	0.00128064	0.024574	0.542916	1.74468
ENSMUSG00000022951	Rcan1	3085	regulator of calcineurin 1 [Source:MGI Symbol;Acc:MGI:1890564]	3.04133	0.00128425	0.0246086	31.8605	78.1242
ENSMUSG00000002983	Relb	3885	avian reticuloendotheliosis viral (v-rel) oncogene related B [Source:MGI Symbol;Acc:MGI:103289]	2.34754	0.00128662	0.0246086	5.19147	9.85272
ENSMUSG00000037992	Rara	4365	retinoic acid receptor, alpha [Source:MGI Symbol;Acc:MGI:97856]	1.48826	0.0012875	0.0246086	11.2158	13.434
ENSMUSG00000020641	Rsad2	4335	radical S-adenosyl methionine domain containing 2 [Source:MGI Symbol;Acc:MGI:1929628]	8.56878	0.00128791	0.0246086	0.210861	1.5191
ENSMUSG00000022848	Slc49a4	5395	solute carrier family 49 member 4 [Source:MGI Symbol;Acc:MGI:2387188]	1.59677	0.00129585	0.0247146	5.12612	6.56948
ENSMUSG00000022601	Zbtb11	7440	zinc finger and BTB domain containing 11 [Source:MGI Symbol;Acc:MGI:2443876]	1.84191	0.00129621	0.0247146	3.00479	4.43027
ENSMUSG00000086695	Gm15247	403	predicted gene 15247 [Source:MGI Symbol;Acc:MGI:3705183]	48.8404	0.00131239	0.0249966	0.188723	7.97946
ENSMUSG00000062519	Zfp398	11758	zinc finger protein 398 [Source:MGI Symbol;Acc:MGI:1917856]	-1.92744	0.00132329	0.0251775	3.83792	1.60281
ENSMUSG00000053134	Supt7l	6994	SPT7-like, STAGA complex gamma subunit [Source:MGI Symbol;Acc:MGI:1919445]	-1.76545	0.0013278	0.0252367	3.21101	1.47146
ENSMUSG00000020255	D10Wsu102e	123179	DNA segment, Chr 10, Wayne State University 102, expressed [Source:MGI Symbol;Acc:MGI:106381]	2.04328	0.0013319	0.0252762	0.662246	1.06419
ENSMUSG00000079138	Gm8818	1047	predicted pseudogene 8818 [Source:MGI Symbol;Acc:MGI:3645903]	18.4032	0.00133269	0.0252762	2.18387	33.1238
ENSMUSG00000090100	Ttbk2	11406	tau tubulin kinase 2 [Source:MGI Symbol;Acc:MGI:2155779]	1.53953	0.00133624	0.0252882	2.59747	3.20255
ENSMUSG00000026970	Rbms1	5473	RNA binding motif, single stranded interacting protein 1 [Source:MGI Symbol;Acc:MGI:1861774]	1.58485	0.00133776	0.0252882	8.29883	10.5919
ENSMUSG00000054519	Zfp867	3412	zinc finger protein 867 [Source:MGI Symbol;Acc:MGI:2681848]	-2.39177	0.00133917	0.0252882	3.95711	1.34118
ENSMUSG00000023159	Psg29	5445	pregnancy-specific glycoprotein 29 [Source:MGI Symbol;Acc:MGI:1891361]	19.2584	0.00134047	0.0252882	0.0055645	0.10691
ENSMUSG00000037712	Fermt2	5191	fermitin family member 2 [Source:MGI Symbol;Acc:MGI:2385001]	1.91977	0.00134174	0.0252882	24.4287	38.0353
ENSMUSG00000034664	Itga2b	5454	integrin alpha 2b [Source:MGI Symbol;Acc:MGI:96601]	2.7386	0.00134177	0.0252882	0.761737	1.67067
ENSMUSG00000020042	Btbd11	10033	BTB (POZ) domain containing 11 [Source:MGI Symbol;Acc:MGI:1921257]	1.73125	0.00134474	0.0253178	0.79867	1.11366
ENSMUSG00000048310	Pskh1	3255	protein serine kinase H1 [Source:MGI Symbol;Acc:MGI:3528383]	-1.78683	0.00134711	0.0253359	7.2229	3.23711
ENSMUSG00000046574	Prr12	7185	proline rich 12 [Source:MGI Symbol;Acc:MGI:2679002]	-1.48081	0.00135011	0.0253658	15.231	8.24423
ENSMUSG00000001786	Fbxo7	6180	F-box protein 7 [Source:MGI Symbol;Acc:MGI:1917004]	-1.75697	0.00135669	0.0254627	3.23324	1.48348
ENSMUSG00000023341	Mx2	3614	MX dynamin-like GTPase 2 [Source:MGI Symbol;Acc:MGI:97244]	3.73297	0.00136899	0.0256668	0.983105	2.93731
ENSMUSG00000108557	Gm44835	3181	predicted gene 44835 [Source:MGI Symbol;Acc:MGI:5753411]	4.24631	0.00137485	0.0257498	0.551815	1.87391
ENSMUSG00000044147	Arf6	1534	ADP-ribosylation factor 6 [Source:MGI Symbol;Acc:MGI:99435]	1.84406	0.00137863	0.0257937	25.8269	38.5902
ENSMUSG00000092680	Snord55	79	small nucleolar RNA, C/D box 55 [Source:MGI Symbol;Acc:MGI:3819543]	9.91933	0.00138493	0.0258711	2.66123	21.4632
ENSMUSG00000041037	Irgq	6083	immunity-related GTPase family, Q [Source:MGI Symbol;Acc:MGI:2667176]	1.70852	0.00138564	0.0258711	4.3821	6.06478
ENSMUSG00000105941	Gm42809	1138	predicted gene 42809 [Source:MGI Symbol;Acc:MGI:5662946]	297.67	0.00138795	0.0258873	0	1.38821
ENSMUSG00000034227	Foxj1	2623	forkhead box J1 [Source:MGI Symbol;Acc:MGI:1347474]	8.47516	0.0013908	0.0258911	0.254535	1.74547
ENSMUSG00000062931	Zfp938	2128	zinc finger protein 938 [Source:MGI Symbol;Acc:MGI:3621440]	-2.60807	0.00139103	0.0258911	4.26129	1.32974
ENSMUSG00000064339	mt-Rnr2	1582	mitochondrially encoded 16S rRNA [Source:MGI Symbol;Acc:MGI:102492]	2.43774	0.00139338	0.0259029	18527.2	36106.6
ENSMUSG00000039680	Mrps6	1533	mitochondrial ribosomal protein S6 [Source:MGI Symbol;Acc:MGI:2153111]	1.87782	0.00139455	0.0259029	15.1155	22.6256
ENSMUSG00000108621	Gm37494	16543	predicted gene, 37494 [Source:MGI Symbol;Acc:MGI:5610722]	-2.02241	0.00139651	0.0259125	2.18343	0.86646
ENSMUSG00000045136	Tubb2b	2294	tubulin, beta 2B class IIB [Source:MGI Symbol;Acc:MGI:1920960]	2.30769	0.00139891	0.0259304	4.30877	8.00968
ENSMUSG00000038459	Abhd17c	4606	abhydrolase domain containing 17C [Source:MGI Symbol;Acc:MGI:1917428]	-1.73976	0.00140084	0.0259394	3.75804	1.74117
ENSMUSG00000098702	1500015A07Rik	2296	RIKEN cDNA 1500015A07 gene [Source:MGI Symbol;Acc:MGI:1916232]	3.94426	0.00140371	0.0259508	1.42873	4.55533
ENSMUSG00000016128	Stard13	8594	StAR-related lipid transfer (START) domain containing 13 [Source:MGI Symbol;Acc:MGI:2385331]	1.66251	0.00140434	0.0259508	4.70892	6.32806
ENSMUSG00000091971	Hspa1a	2967	heat shock protein 1A [Source:MGI Symbol;Acc:MGI:96244]	3.5283	0.00141085	0.0260442	4.65314	13.197
ENSMUSG00000035640	Cbarp	4996	calcium channel, voltage-dependent, beta subunit associated regulatory protein [Source:MGI Symbol;Acc:MGI:1354170]	1.72769	0.00141587	0.0260866	5.77323	7.98878
ENSMUSG00000042834	Nrep	3908	neuronal regeneration related protein [Source:MGI Symbol;Acc:MGI:99444]	-1.98895	0.00141605	0.0260866	56.5266	23.3642
ENSMUSG00000039361	Picalm	15732	phosphatidylinositol binding clathrin assembly protein [Source:MGI Symbol;Acc:MGI:2385902]	1.6852	0.00142855	0.0262452	6.70892	9.09663
ENSMUSG00000024370	Cdc23	9500	CDC23 cell division cycle 23 [Source:MGI Symbol;Acc:MGI:1098815]	-1.5996	0.00142996	0.0262452	3.42785	1.72871
ENSMUSG00000002233	Rhoc	1618	ras homolog family member C [Source:MGI Symbol;Acc:MGI:106028]	1.79856	0.00143001	0.0262452	13.153	19.1496
ENSMUSG00000064181	Rab3ip	3175	RAB3A interacting protein [Source:MGI Symbol;Acc:MGI:105933]	-1.6165	0.00143049	0.0262452	12.2164	6.12321
ENSMUSG00000073680	Tmem88b	3471	transmembrane protein 88B [Source:MGI Symbol;Acc:MGI:2444329]	66.133	0.00143402	0.026283	0.0043439	0.32251
ENSMUSG00000057060	Slc35f3	3348	solute carrier family 35, member F3 [Source:MGI Symbol;Acc:MGI:2444426]	-1.7405	0.00144006	0.0263668	18.1443	8.41109
ENSMUSG00000027163	Commd9	1602	COMM domain containing 9 [Source:MGI Symbol;Acc:MGI:1923751]	-3.01724	0.00144256	0.0263857	3.8283	1.02872
ENSMUSG00000032035	Ets1	8476	E26 avian leukemia oncogene 1, 5' domain [Source:MGI Symbol;Acc:MGI:95455]	3.14313	0.0014466	0.0264277	1.80234	4.54911
ENSMUSG00000085282	Gm15663	3365	predicted gene 15663 [Source:MGI Symbol;Acc:MGI:3783105]	9.93877	0.00144779	0.0264277	0.169265	1.35823
ENSMUSG00000061603	Akap6	14848	A kinase (PRKA) anchor protein 6 [Source:MGI Symbol;Acc:MGI:3050566]	2.47472	0.0014516	0.0264704	1.86303	3.66226
ENSMUSG00000079363	Gbp4	7494	guanylate binding protein 4 [Source:MGI Symbol;Acc:MGI:97072]	4.92383	0.00146706	0.0267252	0.0792281	0.319192
ENSMUSG00000024427	Spry4	4755	sprouty RTK signaling antagonist 4 [Source:MGI Symbol;Acc:MGI:1345144]	2.98341	0.00147429	0.0268298	0.677936	1.60902
ENSMUSG00000097183	Gm17501	2130	predicted gene, 17501 [Source:MGI Symbol;Acc:MGI:4937135]	7.7456	0.00149034	0.0270943	0.164658	1.07968
ENSMUSG00000020227	Irak3	3676	interleukin-1 receptor-associated kinase 3 [Source:MGI Symbol;Acc:MGI:1921164]	4.20349	0.00149965	0.0272202	0.229318	0.800687
ENSMUSG00000033326	Kdm4a	5782	lysine (K)-specific demethylase 4A [Source:MGI Symbol;Acc:MGI:2446210]	-1.47103	0.00150029	0.0272202	16.8545	9.21481
ENSMUSG00000002699	Lcp2	4459	lymphocyte cytosolic protein 2 [Source:MGI Symbol;Acc:MGI:1321402]	9.5525	0.00150861	0.0273312	0.0368698	0.2825
ENSMUSG00000020409	Slu7	4050	SLU7 splicing factor homolog (S. cerevisiae) [Source:MGI Symbol;Acc:MGI:2385598]	-1.50234	0.00150945	0.0273312	17.7067	9.58197
ENSMUSG00000062101	Zfp119b	2166	zinc finger protein 119b [Source:MGI Symbol;Acc:MGI:2385323]	-4.47611	0.00151154	0.0273416	2.14609	0.392145
ENSMUSG00000062822	4833420G17Rik	4882	RIKEN cDNA 4833420G17 gene [Source:MGI Symbol;Acc:MGI:1914642]	-1.75016	0.00151784	0.0274278	5.66436	2.61453
ENSMUSG00000067430	Zfp763	3557	zinc finger protein 763 [Source:MGI Symbol;Acc:MGI:1920701]	-2.42104	0.00152449	0.0275204	3.90215	1.30831
ENSMUSG00000070003	Ssbp4	3164	single stranded DNA binding protein 4 [Source:MGI Symbol;Acc:MGI:1924150]	2.02983	0.00153219	0.0276042	5.28779	8.75198
ENSMUSG00000000275	Trim25	5754	tripartite motif-containing 25 [Source:MGI Symbol;Acc:MGI:102749]	1.77087	0.0015322	0.0276042	3.59209	5.10242
ENSMUSG00000106647	Gm42523	2872	predicted gene 42523 [Source:MGI Symbol;Acc:MGI:5662660]	27.0251	0.00153571	0.0276397	0.0264417	0.648962
ENSMUSG00000051238	Swsap1	1838	SWIM type zinc finger 7 associated protein 1 [Source:MGI Symbol;Acc:MGI:1914212]	-2.36726	0.00154276	0.0277389	5.30899	1.8183
ENSMUSG00000094845	Tmem95	1193	transmembrane protein 95 [Source:MGI Symbol;Acc:MGI:3779488]	6.67993	0.00155201	0.0278772	0.372079	1.99895
ENSMUSG00000002228	Ppm1j	1814	protein phosphatase 1J [Source:MGI Symbol;Acc:MGI:1919137]	8.52408	0.00155632	0.0279169	0.368821	2.58594
ENSMUSG00000005718	Tfap4	2541	transcription factor AP4 [Source:MGI Symbol;Acc:MGI:103239]	-2.67987	0.00155732	0.0279169	2.79342	0.857698
ENSMUSG00000001248	Gramd1a	5239	GRAM domain containing 1A [Source:MGI Symbol;Acc:MGI:105490]	1.55684	0.00157193	0.0281507	8.78585	10.9009
ENSMUSG00000027506	Tpd52	7487	tumor protein D52 [Source:MGI Symbol;Acc:MGI:107749]	1.5077	0.0015758	0.0281697	12.4655	15.1404
ENSMUSG00000029920	Smarcad1	13322	SWI/SNF-related, matrix-associated actin-dependent regulator of chromatin, subfamily a, containing DEAD/H box 1 [Source:MGI Symbol;Acc:MGI:95453]	-1.61636	0.00157613	0.0281697	2.66189	1.33646
ENSMUSG00000048027	Rgmb	7669	repulsive guidance molecule family member B [Source:MGI Symbol;Acc:MGI:1916049]	-1.80202	0.00158985	0.0283869	7.3866	3.30778
ENSMUSG00000041057	Wdr43	4775	WD repeat domain 43 [Source:MGI Symbol;Acc:MGI:1919765]	1.80935	0.00159415	0.0284354	11.6131	16.6758
ENSMUSG00000032643	Fhl3	1683	four and a half LIM domains 3 [Source:MGI Symbol;Acc:MGI:1341092]	3.89341	0.00161792	0.0288308	0.836897	2.65034
ENSMUSG00000029298	Gbp9	5173	guanylate-binding protein 9 [Source:MGI Symbol;Acc:MGI:3605620]	2.40345	0.00162102	0.0288573	0.744099	1.43377
ENSMUSG00000089726	Mir17hg	3536	Mir17 host gene (non-protein coding) [Source:MGI Symbol;Acc:MGI:1923207]	3.8501	0.00162712	0.0289373	0.605965	1.89888
ENSMUSG00000039967	Zfp292	9986	zinc finger protein 292 [Source:MGI Symbol;Acc:MGI:1353423]	-1.52006	0.00162999	0.0289537	11.6651	6.20938
ENSMUSG00000070871	Ccnyl1	3456	cyclin Y-like 1 [Source:MGI Symbol;Acc:MGI:2138614]	1.82755	0.00163236	0.0289537	9.91949	14.4768
ENSMUSG00000024456	Diaph1	6339	diaphanous related formin 1 [Source:MGI Symbol;Acc:MGI:1194490]	1.51445	0.00163287	0.0289537	10.1841	12.3455
ENSMUSG00000098178	Gm42418	1831	predicted gene, 42418 [Source:MGI Symbol;Acc:MGI:5649005]	1.80544	0.00163631	0.0289756	2849.1	4084.13
ENSMUSG00000003282	Plag1	8487	pleiomorphic adenoma gene 1 [Source:MGI Symbol;Acc:MGI:1891916]	-2.37646	0.00163771	0.0289756	2.14525	0.728878
ENSMUSG00000062901	Klhl24	10183	kelch-like 24 [Source:MGI Symbol;Acc:MGI:1923035]	-2.20726	0.00163894	0.0289756	5.07158	1.86412
ENSMUSG00000026584	Scyl3	5802	SCY1-like 3 (S. cerevisiae) [Source:MGI Symbol;Acc:MGI:1921385]	-1.70529	0.00164427	0.0290413	4.24183	1.99456
ENSMUSG00000036381	P2ry14	11059	purinergic receptor P2Y, G-protein coupled, 14 [Source:MGI Symbol;Acc:MGI:2155705]	-24.2954	0.00165258	0.0291594	0.0995179	0.00303121
ENSMUSG00000025722	Wdr73	3721	WD repeat domain 73 [Source:MGI Symbol;Acc:MGI:1919218]	-2.15427	0.00165556	0.0291833	2.28766	0.850074
ENSMUSG00000045502	Hcar2	1930	hydroxycarboxylic acid receptor 2 [Source:MGI Symbol;Acc:MGI:1933383]	52.6451	0.00165898	0.029215	0	0.138321
ENSMUSG00000028268	Gbp3	3265	guanylate binding protein 3 [Source:MGI Symbol;Acc:MGI:1926263]	6.48812	0.00166568	0.0293042	1.15919	6.10126
ENSMUSG00000035236	Scai	12341	suppressor of cancer cell invasion [Source:MGI Symbol;Acc:MGI:2443716]	1.96771	0.00167118	0.0293723	2.81204	4.41045
ENSMUSG00000025142	Aspscr1	4770	alveolar soft part sarcoma chromosome region, candidate 1 (human) [Source:MGI Symbol;Acc:MGI:1916188]	1.59944	0.00167298	0.0293751	7.073	9.15707
ENSMUSG00000022228	Zscan26	4366	zinc finger and SCAN domain containing 26 [Source:MGI Symbol;Acc:MGI:3531417]	-1.64232	0.00167568	0.0293938	8.45606	4.16923
ENSMUSG00000005262	Ufd1	4336	ubiquitin recognition factor in ER-associated degradation 1 [Source:MGI Symbol;Acc:MGI:109353]	-1.72523	0.00167766	0.0293999	7.74047	3.62585
ENSMUSG00000029512	Ulk1	6488	unc-51 like kinase 1 [Source:MGI Symbol;Acc:MGI:1270126]	1.57678	0.00168363	0.0294758	7.92942	10.0782
ENSMUSG00000035104	Eva1a	2805	eva-1 homolog A (C. elegans) [Source:MGI Symbol;Acc:MGI:2385247]	-2.59519	0.00168566	0.0294826	3.47862	1.08752
ENSMUSG00000033970	Rfc3	3611	replication factor C (activator 1) 3 [Source:MGI Symbol;Acc:MGI:1916513]	-3.61834	0.00170903	0.0298382	1.55658	0.341585
ENSMUSG00000061313	Ddhd2	7142	DDHD domain containing 2 [Source:MGI Symbol;Acc:MGI:1919358]	-1.60229	0.00171069	0.0298382	4.54219	2.28006
ENSMUSG00000058638	Zfp110	4116	zinc finger protein 110 [Source:MGI Symbol;Acc:MGI:1890378]	-1.69347	0.00171173	0.0298382	7.90271	3.76779
ENSMUSG00000027583	Zbtb46	8508	zinc finger and BTB domain containing 46 [Source:MGI Symbol;Acc:MGI:1919397]	2.29131	0.00171262	0.0298382	0.82692	1.52414
ENSMUSG00000032691	Nlrp3	4057	NLR family, pyrin domain containing 3 [Source:MGI Symbol;Acc:MGI:2653833]	6.53623	0.00172397	0.0300067	0.10341	0.567097
ENSMUSG00000055134	9130017K11Rik	4573	RIKEN cDNA 9130017K11 gene [Source:MGI Symbol;Acc:MGI:1926030]	81.9071	0.0017289	0.0300163	0	0.0851403
ENSMUSG00000029826	Zc3hav1	6518	zinc finger CCCH type, antiviral 1 [Source:MGI Symbol;Acc:MGI:1926031]	2.17855	0.00173103	0.0300163	3.37702	5.94084
ENSMUSG00000103441	7530428D23Rik	975	RIKEN cDNA 7530428D23 gene [Source:MGI Symbol;Acc:MGI:2442162]	-1.72628	0.00173182	0.0300163	34.326	16.2382
ENSMUSG00000046572	Zfp518b	6882	zinc finger protein 518B [Source:MGI Symbol;Acc:MGI:2140750]	-1.69772	0.00173449	0.0300163	3.57062	1.71044
ENSMUSG00000019806	Aig1	9196	androgen-induced 1 [Source:MGI Symbol;Acc:MGI:1913503]	1.73885	0.00173453	0.0300163	1.74286	2.42606
ENSMUSG00000042404	Dennd4b	6031	DENN/MADD domain containing 4B [Source:MGI Symbol;Acc:MGI:2446201]	1.81653	0.00173524	0.0300163	2.09345	3.0469
ENSMUSG00000030199	Etv6	5983	ets variant 6 [Source:MGI Symbol;Acc:MGI:109336]	1.80656	0.0017362	0.0300163	15.3629	22.0741
ENSMUSG00000039220	Ppp1r10	5623	protein phosphatase 1, regulatory subunit 10 [Source:MGI Symbol;Acc:MGI:1289273]	1.63034	0.00173922	0.0300396	6.31319	8.24546
ENSMUSG00000034795	Ccdc122	1985	coiled-coil domain containing 122 [Source:MGI Symbol;Acc:MGI:1918358]	-1.83318	0.00174174	0.0300543	7.24673	3.21358
ENSMUSG00000027536	Chmp4c	10087	charged multivesicular body protein 4C [Source:MGI Symbol;Acc:MGI:1913621]	1.80433	0.00175699	0.0302884	1.53765	2.25236
ENSMUSG00000050567	Maml1	5528	mastermind like transcriptional coactivator 1 [Source:MGI Symbol;Acc:MGI:1890504]	1.66749	0.00176251	0.0303544	4.83947	6.49194
ENSMUSG00000001424	Snd1	9757	staphylococcal nuclease and tudor domain containing 1 [Source:MGI Symbol;Acc:MGI:1929266]	1.4729	0.00176617	0.0303883	6.58492	7.76533
ENSMUSG00000035873	Pawr	1745	PRKC, apoptosis, WT1, regulator [Source:MGI Symbol;Acc:MGI:2149961]	2.05246	0.00176908	0.0304092	14.0375	23.0924
ENSMUSG00000042298	Ttc19	4675	tetratricopeptide repeat domain 19 [Source:MGI Symbol;Acc:MGI:1920045]	1.61028	0.00177289	0.0304448	4.96179	6.38514
ENSMUSG00000040596	Pogk	9586	pogo transposable element with KRAB domain [Source:MGI Symbol;Acc:MGI:1918842]	-1.40788	0.00177453	0.0304448	9.38373	5.39959
ENSMUSG00000022911	Arl13b	5087	ADP-ribosylation factor-like 13B [Source:MGI Symbol;Acc:MGI:1915396]	1.76682	0.00178585	0.0306098	4.40138	6.238
ENSMUSG00000073176	Zfp449	3738	zinc finger protein 449 [Source:MGI Symbol;Acc:MGI:1925869]	-2.53478	0.00179052	0.0306606	1.87348	0.597206
ENSMUSG00000061436	Hipk2	8836	homeodomain interacting protein kinase 2 [Source:MGI Symbol;Acc:MGI:1314872]	1.49462	0.00179425	0.030673	37.3233	44.9487
ENSMUSG00000015766	Eps8	12355	epidermal growth factor receptor pathway substrate 8 [Source:MGI Symbol;Acc:MGI:104684]	3.15698	0.00179466	0.030673	0.507418	1.29373
ENSMUSG00000068284	Usf3	13050	upstream transcription factor family member 3 [Source:MGI Symbol;Acc:MGI:2685454]	-1.45206	0.00179814	0.0307033	10.4815	5.8386
ENSMUSG00000062937	Mtap	3226	methylthioadenosine phosphorylase [Source:MGI Symbol;Acc:MGI:1914152]	-1.80809	0.00180422	0.0307779	18.5194	8.26175
ENSMUSG00000024513	Mbd2	3214	methyl-CpG binding domain protein 2 [Source:MGI Symbol;Acc:MGI:1333813]	1.44437	0.00181153	0.0308549	26.564	30.9107
ENSMUSG00000028980	H6pd	5236	hexose-6-phosphate dehydrogenase (glucose 1-dehydrogenase) [Source:MGI Symbol;Acc:MGI:2140356]	1.7451	0.00181239	0.0308549	8.75832	12.3947
ENSMUSG00000045411	2410002F23Rik	5233	RIKEN cDNA 2410002F23 gene [Source:MGI Symbol;Acc:MGI:1914226]	-1.68251	0.00181515	0.0308549	4.43851	2.13281
ENSMUSG00000024764	Naa40	9028	N(alpha)-acetyltransferase 40, NatD catalytic subunit [Source:MGI Symbol;Acc:MGI:1918249]	-1.82301	0.0018156	0.0308549	3.12262	1.38358
ENSMUSG00000024589	Nedd4l	19400	neural precursor cell expressed, developmentally down-regulated gene 4-like [Source:MGI Symbol;Acc:MGI:1933754]	1.82463	0.00181907	0.0308847	4.42454	6.42279
ENSMUSG00000042228	Lyn	4073	LYN proto-oncogene, Src family tyrosine kinase [Source:MGI Symbol;Acc:MGI:96892]	2.68762	0.00182308	0.0309224	0.713737	1.53501
ENSMUSG00000052713	Zfp608	8513	zinc finger protein 608 [Source:MGI Symbol;Acc:MGI:2442338]	1.50908	0.00182512	0.0309224	11.3067	13.6444
ENSMUSG00000038418	Egr1	4484	early growth response 1 [Source:MGI Symbol;Acc:MGI:95295]	12.1043	0.00182645	0.0309224	33.4067	328.891
ENSMUSG00000027845	Dclre1b	8405	DNA cross-link repair 1B [Source:MGI Symbol;Acc:MGI:2156057]	-2.66661	0.00182894	0.0309354	0.816786	0.24937
ENSMUSG00000026788	Zbtb43	5225	zinc finger and BTB domain containing 43 [Source:MGI Symbol;Acc:MGI:1919084]	1.60144	0.00183912	0.0310783	3.80479	4.94328
ENSMUSG00000017715	Pgs1	5333	phosphatidylglycerophosphate synthase 1 [Source:MGI Symbol;Acc:MGI:1921701]	2.20842	0.00184376	0.0311275	5.46131	9.48553
ENSMUSG00000024987	Cyp26a1	1983	cytochrome P450, family 26, subfamily a, polypeptide 1 [Source:MGI Symbol;Acc:MGI:1096359]	3.21051	0.00185455	0.0312313	17.9258	46.5066
ENSMUSG00000034723	Tmx4	10907	thioredoxin-related transmembrane protein 4 [Source:MGI Symbol;Acc:MGI:106558]	1.53309	0.00185478	0.0312313	14.7215	18.1037
ENSMUSG00000041548	Hspb8	1950	heat shock protein 8 [Source:MGI Symbol;Acc:MGI:2135756]	3.66324	0.00185512	0.0312313	5.25759	15.6208
ENSMUSG00000039899	Fgl2	3788	fibrinogen-like protein 2 [Source:MGI Symbol;Acc:MGI:103266]	26.3927	0.00185761	0.0312428	0.55909	11.7831
ENSMUSG00000024424	Ttc39c	7234	tetratricopeptide repeat domain 39C [Source:MGI Symbol;Acc:MGI:1919997]	1.99184	0.00185928	0.0312428	2.41251	3.82924
ENSMUSG00000027962	Vcam1	8870	vascular cell adhesion molecule 1 [Source:MGI Symbol;Acc:MGI:98926]	12.0521	0.00186172	0.0312546	0.96652	9.47668
ENSMUSG00000032656	March3	6006	membrane-associated ring finger (C3HC4) 3 [Source:MGI Symbol;Acc:MGI:2443667]	1.96577	0.00186724	0.0312896	1.81125	2.84523
ENSMUSG00000054893	Zfp667	4755	zinc finger protein 667 [Source:MGI Symbol;Acc:MGI:2442757]	2.58204	0.00186728	0.0312896	0.754675	1.58193
ENSMUSG00000044433	Camsap3	6119	calmodulin regulated spectrin-associated protein family, member 3 [Source:MGI Symbol;Acc:MGI:1916947]	-1.7248	0.00187382	0.03137	3.11941	1.45695
ENSMUSG00000052310	Slc39a1	2364	solute carrier family 39 (zinc transporter), member 1 [Source:MGI Symbol;Acc:MGI:1353474]	1.45847	0.00187602	0.0313776	28.7507	33.8149
ENSMUSG00000030103	Bhlhe40	4705	basic helix-loop-helix family, member e40 [Source:MGI Symbol;Acc:MGI:1097714]	1.86942	0.00188054	0.0314239	34.9211	52.4315
ENSMUSG00000042121	Ssh1	8892	slingshot protein phosphatase 1 [Source:MGI Symbol;Acc:MGI:2686240]	1.55737	0.00188404	0.0314327	4.83195	6.10132
ENSMUSG00000030264	Thumpd3	6554	THUMP domain containing 3 [Source:MGI Symbol;Acc:MGI:1277973]	-1.73277	0.00188599	0.0314327	2.74347	1.26031
ENSMUSG00000004947	Dtx2	7032	deltex 2, E3 ubiquitin ligase [Source:MGI Symbol;Acc:MGI:1921448]	1.82542	0.00188631	0.0314327	1.50932	2.21678
ENSMUSG00000097746	Gm6225	7740	predicted gene 6225 [Source:MGI Symbol;Acc:MGI:3643252]	3.44971	0.00191257	0.0318163	0.381656	1.06038
ENSMUSG00000014763	Fam120b	8345	family with sequence similarity 120, member B [Source:MGI Symbol;Acc:MGI:1914794]	-1.50096	0.00191287	0.0318163	4.98934	2.67444
ENSMUSG00000028967	Errfi1	3582	ERBB receptor feedback inhibitor 1 [Source:MGI Symbol;Acc:MGI:1921405]	4.64626	0.0019167	0.0318467	10.6967	40.8891
ENSMUSG00000021585	Cast	11470	calpastatin [Source:MGI Symbol;Acc:MGI:1098236]	1.65525	0.00191824	0.0318467	5.62396	7.44622
ENSMUSG00000006010	Odr4	4100	odr4 GPCR localization factor homolog [Source:MGI Symbol;Acc:MGI:2385108]	-1.5055	0.00192267	0.031854	8.50578	4.57277
ENSMUSG00000072872	Rybp	4740	RING1 and YY1 binding protein [Source:MGI Symbol;Acc:MGI:1929059]	1.85481	0.00192326	0.031854	3.76581	5.65343
ENSMUSG00000020173	Cobl	8142	cordon-bleu WH2 repeat [Source:MGI Symbol;Acc:MGI:105056]	2.92636	0.00192399	0.031854	3.0728	7.32001
ENSMUSG00000103976	Gm37677	7634	predicted gene, 37677 [Source:MGI Symbol;Acc:MGI:5610905]	2.67055	0.00193104	0.0319348	0.70477	1.48933
ENSMUSG00000029196	Tada2b	3791	transcriptional adaptor 2B [Source:MGI Symbol;Acc:MGI:3035274]	-1.54137	0.00193289	0.0319348	10.5815	5.56999
ENSMUSG00000033487	Fndc3a	9944	fibronectin type III domain containing 3A [Source:MGI Symbol;Acc:MGI:1196463]	1.50251	0.00193421	0.0319348	7.4086	8.87567
ENSMUSG00000039738	Slx4	7657	SLX4 structure-specific endonuclease subunit homolog (S. cerevisiae) [Source:MGI Symbol;Acc:MGI:106299]	1.92125	0.00193819	0.0319526	2.27149	3.48103
ENSMUSG00000068876	Cgn	6044	cingulin [Source:MGI Symbol;Acc:MGI:1927237]	1.47021	0.00193884	0.0319526	16.3047	19.2908
ENSMUSG00000038206	Fbxo8	5476	F-box protein 8 [Source:MGI Symbol;Acc:MGI:1354696]	-2.19835	0.00194374	0.0320041	2.46602	0.897337
ENSMUSG00000047547	Cltb	4868	clathrin, light polypeptide (Lcb) [Source:MGI Symbol;Acc:MGI:1921575]	1.48036	0.0019458	0.0320087	32.0014	38.1242
ENSMUSG00000047368	Abhd17b	2833	abhydrolase domain containing 17B [Source:MGI Symbol;Acc:MGI:1917816]	1.69255	0.00194978	0.0320449	5.20445	7.07798
ENSMUSG00000002325	Irf9	5386	interferon regulatory factor 9 [Source:MGI Symbol;Acc:MGI:107587]	2.43072	0.00195827	0.0321339	1.96144	3.766
ENSMUSG00000021179	Nrde2	4196	nrde-2 necessary for RNA interference, domain containing [Source:MGI Symbol;Acc:MGI:2670969]	-1.62603	0.00195877	0.0321339	7.87745	3.92287
ENSMUSG00000021609	Slc6a3	3456	solute carrier family 6 (neurotransmitter transporter, dopamine), member 3 [Source:MGI Symbol;Acc:MGI:94862]	4.48663	0.00196713	0.0321753	0.385934	1.38127
ENSMUSG00000053436	Mapk14	4376	mitogen-activated protein kinase 14 [Source:MGI Symbol;Acc:MGI:1346865]	1.68167	0.00196714	0.0321753	7.55378	10.1276
ENSMUSG00000046897	Zfp740	5091	zinc finger protein 740 [Source:MGI Symbol;Acc:MGI:1915994]	-1.61838	0.00196719	0.0321753	13.3621	6.63626
ENSMUSG00000000134	Tfe3	9261	transcription factor E3 [Source:MGI Symbol;Acc:MGI:98511]	1.59076	0.00196845	0.0321753	3.2502	4.17513
ENSMUSG00000031765	Mt1	1246	metallothionein 1 [Source:MGI Symbol;Acc:MGI:97171]	9.79565	0.00197939	0.0323246	27.9849	222.481
ENSMUSG00000034390	Cmip	6495	c-Maf inducing protein [Source:MGI Symbol;Acc:MGI:1921690]	1.51295	0.00198802	0.0324361	6.61969	8.01762
ENSMUSG00000029125	Stx18	4593	syntaxin 18 [Source:MGI Symbol;Acc:MGI:1918366]	-1.79169	0.00199051	0.0324473	7.03794	3.18314
ENSMUSG00000040329	Il7	5664	interleukin 7 [Source:MGI Symbol;Acc:MGI:96561]	163.181	0.00199467	0.0324857	0	0.144475
ENSMUSG00000037808	Fam76b	4667	family with sequence similarity 76, member B [Source:MGI Symbol;Acc:MGI:1920076]	-1.70532	0.00200254	0.0325705	6.71548	3.1684
ENSMUSG00000032366	Tpm1	6485	tropomyosin 1, alpha [Source:MGI Symbol;Acc:MGI:98809]	1.76589	0.0020035	0.0325705	36.6845	52.4214
ENSMUSG00000004951	Hspb1	1031	heat shock protein 1 [Source:MGI Symbol;Acc:MGI:96240]	3.78668	0.00201853	0.0327851	30.0602	92.4551
ENSMUSG00000070056	Mfhas1	6666	malignant fibrous histiocytoma amplified sequence 1 [Source:MGI Symbol;Acc:MGI:1098644]	1.55707	0.00202243	0.0328189	5.06376	6.34893
ENSMUSG00000054321	Taf4b	5149	TATA-box binding protein associated factor 4b [Source:MGI Symbol;Acc:MGI:2152345]	2.48659	0.00202954	0.0328545	0.947096	1.88827
ENSMUSG00000028771	Ptpn12	3509	protein tyrosine phosphatase, non-receptor type 12 [Source:MGI Symbol;Acc:MGI:104673]	1.57451	0.00203025	0.0328545	5.2259	6.57301
ENSMUSG00000076441	Ass1	2414	argininosuccinate synthetase 1 [Source:MGI Symbol;Acc:MGI:88090]	-1.75487	0.00203121	0.0328545	194.485	90.9215
ENSMUSG00000088892	Gm22518	68	predicted gene, 22518 [Source:MGI Symbol;Acc:MGI:5452295]	202.01	0.00203276	0.0328545	0	14.268
ENSMUSG00000008305	Tle1	8711	transducin-like enhancer of split 1 [Source:MGI Symbol;Acc:MGI:104636]	1.76381	0.00203491	0.0328545	3.56485	4.9804
ENSMUSG00000026826	Nr4a2	4059	nuclear receptor subfamily 4, group A, member 2 [Source:MGI Symbol;Acc:MGI:1352456]	7.19604	0.00203559	0.0328545	0.370012	2.12896
ENSMUSG00000024891	Slc29a2	3018	solute carrier family 29 (nucleoside transporters), member 2 [Source:MGI Symbol;Acc:MGI:1345278]	2.73897	0.00204246	0.0329358	1.19698	2.61401
ENSMUSG00000064367	mt-Nd5	1824	mitochondrially encoded NADH dehydrogenase 5 [Source:MGI Symbol;Acc:MGI:102496]	1.74842	0.0020631	0.0332389	964.827	1357.15
ENSMUSG00000021824	Ap3m1	7015	adaptor-related protein complex 3, mu 1 subunit [Source:MGI Symbol;Acc:MGI:1929212]	-1.98226	0.00206629	0.0332605	2.50676	1.03198
ENSMUSG00000018398	Sept8	6087	septin 8 [Source:MGI Symbol;Acc:MGI:894310]	-1.40538	0.00206921	0.0332776	56.2821	32.3997
ENSMUSG00000025269	Apex2	8744	apurinic/apyrimidinic endonuclease 2 [Source:MGI Symbol;Acc:MGI:1924872]	1.89821	0.00207581	0.0333318	1.57759	2.37937
ENSMUSG00000042032	Mat2b	5001	methionine adenosyltransferase II, beta [Source:MGI Symbol;Acc:MGI:1913667]	-2.08764	0.00207628	0.0333318	3.10697	1.20441
ENSMUSG00000021639	Gtf2h2	4661	general transcription factor II H, polypeptide 2 [Source:MGI Symbol;Acc:MGI:1345669]	-1.87016	0.00208294	0.0334088	3.49058	1.52588
ENSMUSG00000050212	Eva1b	1942	eva-1 homolog B (C. elegans) [Source:MGI Symbol;Acc:MGI:1922063]	3.85694	0.00208853	0.0334419	0.549655	1.6691
ENSMUSG00000026080	Chst10	11964	carbohydrate sulfotransferase 10 [Source:MGI Symbol;Acc:MGI:2138283]	-2.36537	0.0020888	0.0334419	1.13224	0.38668
ENSMUSG00000029617	Ccz1	4480	CCZ1 vacuolar protein trafficking and biogenesis associated [Source:MGI Symbol;Acc:MGI:2141070]	-1.53136	0.00209059	0.0334419	7.26905	3.82928
ENSMUSG00000057346	Apol9a	5953	apolipoprotein L 9a [Source:MGI Symbol;Acc:MGI:3606001]	3.57317	0.00209285	0.0334484	0.104565	0.304838
ENSMUSG00000025025	Mxi1	6823	MAX interactor 1, dimerization protein [Source:MGI Symbol;Acc:MGI:97245]	-1.47379	0.00209808	0.0334874	9.88771	5.43858
ENSMUSG00000023034	Nr4a1	3509	nuclear receptor subfamily 4, group A, member 1 [Source:MGI Symbol;Acc:MGI:1352454]	15.1432	0.0021004	0.0334874	8.66759	105.285
ENSMUSG00000031842	Pde4c	5592	phosphodiesterase 4C, cAMP specific [Source:MGI Symbol;Acc:MGI:99556]	36.4489	0.00210223	0.0334874	0.0108414	0.348132
ENSMUSG00000026064	Ptp4a1	5541	protein tyrosine phosphatase 4a1 [Source:MGI Symbol;Acc:MGI:1277096]	3.99047	0.00210274	0.0334874	0.278513	0.881856
ENSMUSG00000021510	Zfp729a	9771	zinc finger protein 729a [Source:MGI Symbol;Acc:MGI:3036250]	-2.06686	0.00211415	0.0336393	1.14222	0.446706
ENSMUSG00000020883	Fbxl20	12106	F-box and leucine-rich repeat protein 20 [Source:MGI Symbol;Acc:MGI:1919444]	-1.62405	0.00211797	0.0336704	3.92451	1.93877
ENSMUSG00000058755	Osm	2272	oncostatin M [Source:MGI Symbol;Acc:MGI:104749]	48.7105	0.00213708	0.0339441	0.00665824	0.380562
ENSMUSG00000100779	Gm29292	766	predicted gene 29292 [Source:MGI Symbol;Acc:MGI:5579998]	22.9143	0.00214027	0.0339512	0.158644	3.2068
ENSMUSG00000013275	Slc41a1	4912	solute carrier family 41, member 1 [Source:MGI Symbol;Acc:MGI:2444823]	1.39953	0.00214131	0.0339512	19.4128	21.9428
ENSMUSG00000062202	Btbd9	18201	BTB (POZ) domain containing 9 [Source:MGI Symbol;Acc:MGI:1916625]	1.47367	0.00214507	0.0339585	2.01374	2.39644
ENSMUSG00000029729	Zkscan1	8541	zinc finger with KRAB and SCAN domains 1 [Source:MGI Symbol;Acc:MGI:1921820]	-1.53554	0.00214554	0.0339585	8.8491	4.63357
ENSMUSG00000037316	Bag4	7032	BCL2-associated athanogene 4 [Source:MGI Symbol;Acc:MGI:1914634]	-1.61568	0.00214772	0.0339631	3.35051	1.68228
ENSMUSG00000055809	Dnaaf3	2224	dynein, axonemal assembly factor 3 [Source:MGI Symbol;Acc:MGI:3588207]	8.07164	0.00215425	0.0340364	0.151992	0.996196
ENSMUSG00000066880	Zfp617	3024	zinc finger protein 617 [Source:MGI Symbol;Acc:MGI:2684459]	-2.24713	0.00215788	0.0340632	4.53611	1.6663
ENSMUSG00000019232	Etnppl	8262	ethanolamine phosphate phospholyase [Source:MGI Symbol;Acc:MGI:1919010]	-2.80664	0.00215974	0.0340632	1.93412	0.570313
ENSMUSG00000024378	Stard4	5586	StAR-related lipid transfer (START) domain containing 4 [Source:MGI Symbol;Acc:MGI:2156764]	-1.86791	0.00217007	0.0341834	4.26692	1.83747
ENSMUSG00000040624	Plekhg1	8997	pleckstrin homology domain containing, family G (with RhoGef domain) member 1 [Source:MGI Symbol;Acc:MGI:2676551]	-1.52815	0.00217116	0.0341834	8.87697	4.70666
ENSMUSG00000031691	Tnpo2	6285	transportin 2 (importin 3, karyopherin beta 2b) [Source:MGI Symbol;Acc:MGI:2384849]	-1.41814	0.00218438	0.0343614	10.051	5.72258
ENSMUSG00000026393	Nek7	7376	NIMA (never in mitosis gene a)-related expressed kinase 7 [Source:MGI Symbol;Acc:MGI:1890645]	-1.54064	0.00219056	0.0343669	9.46989	5.01689
ENSMUSG00000014907	Naf1	3094	nuclear assembly factor 1 ribonucleoprotein [Source:MGI Symbol;Acc:MGI:2682306]	1.71573	0.00219186	0.0343669	3.42025	4.75543
ENSMUSG00000014426	Map3k4	10181	mitogen-activated protein kinase kinase kinase 4 [Source:MGI Symbol;Acc:MGI:1346875]	1.42659	0.00219212	0.0343669	6.54852	7.53788
ENSMUSG00000048279	Sacs	20414	sacsin [Source:MGI Symbol;Acc:MGI:1354724]	1.79121	0.00219237	0.0343669	2.04601	2.9417
ENSMUSG00000014786	Slc9a5	5240	solute carrier family 9 (sodium/hydrogen exchanger), member 5 [Source:MGI Symbol;Acc:MGI:2685542]	2.25009	0.00219677	0.0343897	1.45341	2.62694
ENSMUSG00000032788	Pdxk	5397	pyridoxal (pyridoxine, vitamin B6) kinase [Source:MGI Symbol;Acc:MGI:1351869]	-1.75562	0.00219765	0.0343897	13.802	6.39466
ENSMUSG00000023249	Parp3	3699	poly (ADP-ribose) polymerase family, member 3 [Source:MGI Symbol;Acc:MGI:1891258]	1.9556	0.00221401	0.0346156	8.2216	12.7168
ENSMUSG00000059195	Gm12715	1128	predicted gene 12715 [Source:MGI Symbol;Acc:MGI:3650759]	2.92529	0.00221596	0.034616	6.274	14.7918
ENSMUSG00000001380	Hars	2447	histidyl-tRNA synthetase [Source:MGI Symbol;Acc:MGI:108087]	1.55717	0.00222754	0.0347667	9.8309	12.3394
ENSMUSG00000019856	Fam184a	5368	family with sequence similarity 184, member A [Source:MGI Symbol;Acc:MGI:1923156]	1.5505	0.00223182	0.0348032	9.55504	11.8336
ENSMUSG00000041025	Iffo2	6216	intermediate filament family orphan 2 [Source:MGI Symbol;Acc:MGI:2140675]	2.19661	0.00224007	0.0348695	0.622231	1.10156
ENSMUSG00000032599	Ip6k2	4067	inositol hexaphosphate kinase 2 [Source:MGI Symbol;Acc:MGI:1923750]	1.52832	0.00224295	0.0348695	11.6258	14.2415
ENSMUSG00000073427	Gm4924	6302	predicted gene 4924 [Source:MGI Symbol;Acc:MGI:3643133]	-2.36171	0.00224362	0.0348695	1.69664	0.586433
ENSMUSG00000106121	Gm42679	2906	predicted gene 42679 [Source:MGI Symbol;Acc:MGI:5662816]	13.7629	0.00224383	0.0348695	1.55934	17.2443
ENSMUSG00000031871	Cdh5	4203	cadherin 5 [Source:MGI Symbol;Acc:MGI:105057]	10.0189	0.00226234	0.0351268	0.0575033	0.47101
ENSMUSG00000097296	Gm26532	690	predicted gene, 26532 [Source:MGI Symbol;Acc:MGI:5477026]	4.90955	0.00226639	0.0351594	1.93461	7.5178
ENSMUSG00000018415	Gid4	4864	GID complex subunit 4, VID24 homolog [Source:MGI Symbol;Acc:MGI:1914021]	-1.57196	0.00227147	0.0352077	7.1906	3.73149
ENSMUSG00000052155	Acvr2a	5686	activin receptor IIA [Source:MGI Symbol;Acc:MGI:102806]	-1.69397	0.00227843	0.0352853	3.72859	1.76988
ENSMUSG00000109498	Gm45222	4307	predicted gene 45222 [Source:MGI Symbol;Acc:MGI:5753798]	2.9713	0.00228619	0.035375	0.920842	2.18298
ENSMUSG00000050447	Lypd6	3729	LY6/PLAUR domain containing 6 [Source:MGI Symbol;Acc:MGI:2443848]	-1.8357	0.00229154	0.0354272	7.50291	3.35663
ENSMUSG00000105378	Gm42515	3583	predicted gene 42515 [Source:MGI Symbol;Acc:MGI:5662652]	2.62411	0.00229928	0.0355164	1.09642	2.3035
ENSMUSG00000034422	Parp14	9306	poly (ADP-ribose) polymerase family, member 14 [Source:MGI Symbol;Acc:MGI:1919489]	3.61591	0.00230357	0.0355521	0.950646	2.77759
ENSMUSG00000061024	Rrs1	2048	ribosome biogenesis regulator 1 [Source:MGI Symbol;Acc:MGI:1929721]	1.69027	0.00231773	0.03574	7.57986	10.3218
ENSMUSG00000026360	Rgs2	3627	regulator of G-protein signaling 2 [Source:MGI Symbol;Acc:MGI:1098271]	2.27187	0.00232181	0.0357721	3.13113	5.68282
ENSMUSG00000117869	Snhg4	4666	small nucleolar RNA host gene 4 [Source:MGI Symbol;Acc:MGI:4937091]	4.28233	0.00233546	0.0359517	0.15964	0.537958
ENSMUSG00000023931	Efhb	4290	EF hand domain family, member B [Source:MGI Symbol;Acc:MGI:3045296]	10.667	0.00234164	0.0360159	0.0561498	0.491396
ENSMUSG00000008307	1700109H08Rik	3062	RIKEN cDNA 1700109H08 gene [Source:MGI Symbol;Acc:MGI:1924286]	2.37445	0.00234535	0.0360422	2.99655	5.70642
ENSMUSG00000058427	Cxcl2	2068	chemokine (C-X-C motif) ligand 2 [Source:MGI Symbol;Acc:MGI:1340094]	18.1786	0.00236544	0.0363199	1.86881	28.095
ENSMUSG00000066149	Cdc26	7180	cell division cycle 26 [Source:MGI Symbol;Acc:MGI:1913690]	-1.80492	0.00237758	0.0364752	2.44269	1.08145
ENSMUSG00000022897	Dyrk1a	8251	dual-specificity tyrosine-(Y)-phosphorylation regulated kinase 1a [Source:MGI Symbol;Acc:MGI:1330299]	1.41325	0.00239215	0.0366673	12.0328	13.784
ENSMUSG00000028869	Gnl2	3683	guanine nucleotide binding protein-like 2 (nucleolar) [Source:MGI Symbol;Acc:MGI:2385207]	1.52166	0.00240352	0.0368104	27.5464	33.4642
ENSMUSG00000022178	Ajuba	3646	ajuba LIM protein [Source:MGI Symbol;Acc:MGI:1341886]	-1.82764	0.00243398	0.0371786	12.8546	5.62432
ENSMUSG00000002578	Ikzf4	6461	IKAROS family zinc finger 4 [Source:MGI Symbol;Acc:MGI:1343139]	2.4736	0.00243618	0.0371786	2.4695	4.91608
ENSMUSG00000003051	Elf3	2217	E74-like factor 3 [Source:MGI Symbol;Acc:MGI:1101781]	2.73246	0.00243627	0.0371786	2.52093	5.55065
ENSMUSG00000108560	Gm44695	1631	predicted gene 44695 [Source:MGI Symbol;Acc:MGI:5753271]	3.37659	0.002438	0.0371786	2.32923	6.17835
ENSMUSG00000048416	Mlf1	1719	myeloid leukemia factor 1 [Source:MGI Symbol;Acc:MGI:1341819]	6.532	0.00243831	0.0371786	0.888531	4.69278
ENSMUSG00000035021	Baz1a	7159	bromodomain adjacent to zinc finger domain 1A [Source:MGI Symbol;Acc:MGI:1309478]	2.10467	0.00243998	0.0371786	1.98204	3.35945
ENSMUSG00000016933	Plcg1	7857	phospholipase C, gamma 1 [Source:MGI Symbol;Acc:MGI:97615]	-1.4621	0.00244283	0.0371905	11.2541	6.20262
ENSMUSG00000035992	Fnip1	7119	folliculin interacting protein 1 [Source:MGI Symbol;Acc:MGI:2444668]	1.44063	0.00246868	0.0375523	5.25134	6.07429
ENSMUSG00000113927	5330409N07Rik	3518	RIKEN cDNA 5330409N07 gene [Source:MGI Symbol;Acc:MGI:2442687]	39.811	0.00247857	0.0376271	0.0129067	0.474538
ENSMUSG00000064337	mt-Rnr1	955	mitochondrially encoded 12S rRNA [Source:MGI Symbol;Acc:MGI:102493]	2.43891	0.00247906	0.0376271	11631.5	22719.7
ENSMUSG00000026628	Atf3	2154	activating transcription factor 3 [Source:MGI Symbol;Acc:MGI:109384]	10.1704	0.00247987	0.0376271	33.0227	268.962
ENSMUSG00000037447	Arid5a	12540	AT rich interactive domain 5A (MRF1-like) [Source:MGI Symbol;Acc:MGI:2443039]	3.25832	0.00249945	0.0378913	1.611	4.18987
ENSMUSG00000030203	Dusp16	7798	dual specificity phosphatase 16 [Source:MGI Symbol;Acc:MGI:1917936]	1.59553	0.0025015	0.0378913	5.57008	7.17865
ENSMUSG00000022218	Tgm1	3162	transglutaminase 1, K polypeptide [Source:MGI Symbol;Acc:MGI:98730]	13.7961	0.00251763	0.0380836	0.742571	8.3118
ENSMUSG00000031758	Cdyl2	2411	chromodomain protein, Y chromosome-like 2 [Source:MGI Symbol;Acc:MGI:1923046]	-2.03115	0.00251843	0.0380836	4.15805	1.64745
ENSMUSG00000091387	Gcnt4	5087	glucosaminyl (N-acetyl) transferase 4, core 2 (beta-1,6-N-acetylglucosaminyltransferase) [Source:MGI Symbol;Acc:MGI:2684919]	4.51249	0.00252334	0.0381258	2.03437	7.27538
ENSMUSG00000022558	Mroh1	16468	maestro heat-like repeat family member 1 [Source:MGI Symbol;Acc:MGI:2442558]	1.60841	0.00252568	0.0381291	1.85634	2.40466
ENSMUSG00000023991	Foxp4	4926	forkhead box P4 [Source:MGI Symbol;Acc:MGI:1921373]	1.55938	0.00252786	0.03813	15.0987	18.8192
ENSMUSG00000009681	Bcr	8191	breakpoint cluster region [Source:MGI Symbol;Acc:MGI:88141]	1.40358	0.00253092	0.0381441	15.8377	17.9331
ENSMUSG00000044726	Erich5	2383	glutamate rich 5 [Source:MGI Symbol;Acc:MGI:2447772]	-1.70712	0.00253363	0.038153	267.911	127.343
ENSMUSG00000029135	Fosl2	9680	fos-like antigen 2 [Source:MGI Symbol;Acc:MGI:102858]	2.1793	0.00253812	0.0381886	16.7129	29.2633
ENSMUSG00000035342	Lzts2	3608	leucine zipper, putative tumor suppressor 2 [Source:MGI Symbol;Acc:MGI:2385095]	-1.53793	0.00257602	0.0387265	9.03818	4.71844
ENSMUSG00000040331	Nsmce4a	5044	NSE4 homolog A, SMC5-SMC6 complex component [Source:MGI Symbol;Acc:MGI:1915122]	-1.56045	0.00258036	0.0387593	10.6528	5.51756
ENSMUSG00000047264	Zfp358	2455	zinc finger protein 358 [Source:MGI Symbol;Acc:MGI:2153740]	-2.08624	0.00258364	0.0387761	4.44199	1.71907
ENSMUSG00000109812	Gm45640	1896	predicted gene 45640 [Source:MGI Symbol;Acc:MGI:5791476]	2.18786	0.00258992	0.038838	1.90705	3.35814
ENSMUSG00000033964	Zbtb41	8400	zinc finger and BTB domain containing 41 [Source:MGI Symbol;Acc:MGI:2444487]	-1.60583	0.00259327	0.0388558	9.13936	4.62728
ENSMUSG00000046111	Cep295	16238	centrosomal protein 295 [Source:MGI Symbol;Acc:MGI:2442521]	-1.71986	0.00259726	0.0388832	2.7579	1.28697
ENSMUSG00000038167	Plekhg6	3299	pleckstrin homology domain containing, family G (with RhoGef domain) member 6 [Source:MGI Symbol;Acc:MGI:2682298]	2.84943	0.00260967	0.0389575	1.73043	3.98581
ENSMUSG00000031176	Dynlt3	2576	dynein light chain Tctex-type 3 [Source:MGI Symbol;Acc:MGI:1914367]	-1.59446	0.0026097	0.0389575	24.9759	12.7575
ENSMUSG00000053774	Ubxn7	12655	UBX domain protein 7 [Source:MGI Symbol;Acc:MGI:2146388]	-1.40853	0.00260984	0.0389575	9.20656	5.27348
ENSMUSG00000064350	mt-Ty	67	mitochondrially encoded tRNA tyrosine [Source:MGI Symbol;Acc:MGI:102470]	2.24378	0.00261089	0.0389575	64.3369	115.904
ENSMUSG00000014496	Ankrd28	12233	ankyrin repeat domain 28 [Source:MGI Symbol;Acc:MGI:2145661]	1.4555	0.00261584	0.0389991	6.86525	7.97625
ENSMUSG00000097048	1600020E01Rik	4328	RIKEN cDNA 1600020E01 gene [Source:MGI Symbol;Acc:MGI:1919262]	1.99808	0.00263799	0.0392966	3.2527	5.15154
ENSMUSG00000074406	Zfp628	3523	zinc finger protein 628 [Source:MGI Symbol;Acc:MGI:2665174]	-1.66287	0.00264338	0.0393443	8.37894	4.06599
ENSMUSG00000114169	Gm47075	2015	predicted gene, 47075 [Source:MGI Symbol;Acc:MGI:6095795]	7.76724	0.00265003	0.0394107	0.157526	0.976984
ENSMUSG00000022387	Brd1	8404	bromodomain containing 1 [Source:MGI Symbol;Acc:MGI:1924161]	-1.36176	0.00265749	0.0394637	12.8193	7.59547
ENSMUSG00000026659	Dusp12	2743	dual specificity phosphatase 12 [Source:MGI Symbol;Acc:MGI:1890614]	-3.07024	0.00265798	0.0394637	1.87593	0.493276
ENSMUSG00000047878	A4galt	2278	alpha 1,4-galactosyltransferase [Source:MGI Symbol;Acc:MGI:3512453]	8.63155	0.00266957	0.039603	0.0991432	0.737323
ENSMUSG00000069727	Zfp975	4460	zinc finger protein 975 [Source:MGI Symbol;Acc:MGI:3648690]	-2.4125	0.00267297	0.0396208	1.46017	0.481918
ENSMUSG00000019951	Uhrf1bp1l	9235	UHRF1 (ICBP90) binding protein 1-like [Source:MGI Symbol;Acc:MGI:2442888]	1.56761	0.00267699	0.0396344	5.9574	7.46932
ENSMUSG00000029486	Mrpl1	4295	mitochondrial ribosomal protein L1 [Source:MGI Symbol;Acc:MGI:2137202]	-1.88677	0.00267912	0.0396344	2.58244	1.0955
ENSMUSG00000039458	Mtmr12	7041	myotubularin related protein 12 [Source:MGI Symbol;Acc:MGI:2443034]	1.52879	0.00268051	0.0396344	5.33299	6.53888
ENSMUSG00000039782	Cpeb2	7816	cytoplasmic polyadenylation element binding protein 2 [Source:MGI Symbol;Acc:MGI:2442640]	1.60625	0.00268307	0.0396398	5.38038	6.86459
ENSMUSG00000112160	BC024063	2726	cDNA sequence BC024063 [Source:MGI Symbol;Acc:MGI:2670978]	-4.51128	0.00268544	0.0396423	1.44341	0.266843
ENSMUSG00000061455	Stx17	5935	syntaxin 17 [Source:MGI Symbol;Acc:MGI:1914977]	-1.83661	0.00269177	0.0397028	3.97598	1.74186
ENSMUSG00000015354	Pcolce2	4625	procollagen C-endopeptidase enhancer 2 [Source:MGI Symbol;Acc:MGI:1923727]	5.19241	0.00269396	0.0397028	0.0997191	0.402708
ENSMUSG00000021877	Arf4	3603	ADP-ribosylation factor 4 [Source:MGI Symbol;Acc:MGI:99433]	1.60815	0.0027005	0.0397666	19.2956	25.2002
ENSMUSG00000027540	Ptpn1	5533	protein tyrosine phosphatase, non-receptor type 1 [Source:MGI Symbol;Acc:MGI:97805]	1.69404	0.0027059	0.0398135	5.93775	8.02086
ENSMUSG00000023047	Amhr2	2005	anti-Mullerian hormone type 2 receptor [Source:MGI Symbol;Acc:MGI:105062]	37.0869	0.00272559	0.0400705	0.0075389	0.305383
ENSMUSG00000045045	Lrfn4	3366	leucine rich repeat and fibronectin type III domain containing 4 [Source:MGI Symbol;Acc:MGI:2385612]	1.80392	0.00273083	0.0401147	3.64652	5.27856
ENSMUSG00000040818	Dennd6a	8343	DENN/MADD domain containing 6A [Source:MGI Symbol;Acc:MGI:2442980]	-1.62837	0.0027413	0.0402056	4.19983	2.09007
ENSMUSG00000025477	Inpp5a	5649	inositol polyphosphate-5-phosphatase A [Source:MGI Symbol;Acc:MGI:2686961]	1.50032	0.00274149	0.0402056	4.89939	5.93113
ENSMUSG00000095098	Ccdc85b	4715	coiled-coil domain containing 85B [Source:MGI Symbol;Acc:MGI:2147607]	1.4379	0.00275106	0.0403129	7.44508	8.61619
ENSMUSG00000047180	Neurl3	3217	neuralized E3 ubiquitin protein ligase 3 [Source:MGI Symbol;Acc:MGI:2429944]	8.46686	0.00276033	0.0404	0.100521	0.716569
ENSMUSG00000026604	Ptpn14	13413	protein tyrosine phosphatase, non-receptor type 14 [Source:MGI Symbol;Acc:MGI:102467]	1.46789	0.00276149	0.0404	7.75168	9.12053
ENSMUSG00000033863	Klf9	4815	Kruppel-like factor 9 [Source:MGI Symbol;Acc:MGI:1333856]	2.33891	0.00276394	0.0404017	6.6318	12.6503
ENSMUSG00000078578	Ube2d3	24499	ubiquitin-conjugating enzyme E2D 3 [Source:MGI Symbol;Acc:MGI:1913355]	1.47313	0.00276761	0.0404017	5.94053	7.07373
ENSMUSG00000079679	Vwde	7287	von Willebrand factor D and EGF domains [Source:MGI Symbol;Acc:MGI:2685313]	5.06575	0.00276835	0.0404017	0.0820222	0.334122
ENSMUSG00000089809	Rasgef1b	13805	RasGEF domain family, member 1B [Source:MGI Symbol;Acc:MGI:2443755]	1.85646	0.00277868	0.0405029	1.34509	2.02773
ENSMUSG00000075595	Zfp652	15444	zinc finger protein 652 [Source:MGI Symbol;Acc:MGI:2442221]	-1.35629	0.00277979	0.0405029	7.82863	4.65538
ENSMUSG00000105528	Gm43519	1872	predicted gene 43519 [Source:MGI Symbol;Acc:MGI:5663656]	15.4234	0.0027889	0.0406027	0.0798903	1.03717
ENSMUSG00000064341	mt-Nd1	957	mitochondrially encoded NADH dehydrogenase 1 [Source:MGI Symbol;Acc:MGI:101787]	1.62553	0.00279418	0.0406467	1401.56	1830.59
ENSMUSG00000028914	Casp9	5197	caspase 9 [Source:MGI Symbol;Acc:MGI:1277950]	-1.57414	0.00280148	0.0407199	5.75986	2.937
ENSMUSG00000045193	Cirbp	2604	cold inducible RNA binding protein [Source:MGI Symbol;Acc:MGI:893588]	-1.53679	0.00281324	0.0408579	24.0869	12.6588
ENSMUSG00000019467	Arhgef25	3994	Rho guanine nucleotide exchange factor (GEF) 25 [Source:MGI Symbol;Acc:MGI:1277173]	-1.54559	0.00282081	0.0409348	10.3397	5.4008
ENSMUSG00000028133	Rwdd3	5065	RWD domain containing 3 [Source:MGI Symbol;Acc:MGI:1920420]	-3.27617	0.00282383	0.0409455	1.19177	0.299857
ENSMUSG00000029420	Rimbp2	8646	RIMS binding protein 2 [Source:MGI Symbol;Acc:MGI:2443235]	1.63374	0.00285038	0.0412972	1.86213	2.44554
ENSMUSG00000113409	Gm8288	593	predicted gene 8288 [Source:MGI Symbol;Acc:MGI:3645459]	30.2169	0.00285872	0.0413847	0.102469	2.75077
ENSMUSG00000052305	Hbb-bs	768	hemoglobin, beta adult s chain [Source:MGI Symbol;Acc:MGI:5474852]	8.48692	0.00286864	0.0414949	5.06595	35.5257
ENSMUSG00000050994	Adgb	6192	androglobin [Source:MGI Symbol;Acc:MGI:3605549]	5.55444	0.00287621	0.0415562	0.0293708	0.137598
ENSMUSG00000018395	Kif3a	3586	kinesin family member 3A [Source:MGI Symbol;Acc:MGI:107689]	-1.43588	0.00287904	0.0415562	24.6704	13.9288
ENSMUSG00000026764	Kif5c	7142	kinesin family member 5C [Source:MGI Symbol;Acc:MGI:1098269]	1.54632	0.00288188	0.0415562	15.4131	19.0288
ENSMUSG00000056201	Cfl1	2844	cofilin 1, non-muscle [Source:MGI Symbol;Acc:MGI:101757]	1.83931	0.00288213	0.0415562	22.259	33.3867
ENSMUSG00000046223	Plaur	2617	plasminogen activator, urokinase receptor [Source:MGI Symbol;Acc:MGI:97612]	36.6878	0.00289206	0.0416661	0.18323	5.54132
ENSMUSG00000116725	Gm29686	1789	predicted gene, 29686 [Source:MGI Symbol;Acc:MGI:5588845]	56.9827	0.00290206	0.0417766	0	0.159132
ENSMUSG00000046546	Fam43a	3075	family with sequence similarity 43, member A [Source:MGI Symbol;Acc:MGI:2676309]	1.74372	0.00290629	0.0418041	3.3498	4.74309
ENSMUSG00000103818	Gm38009	3341	predicted gene, 38009 [Source:MGI Symbol;Acc:MGI:5611237]	2.46674	0.00290932	0.0418048	0.847875	1.69552
ENSMUSG00000021650	Ptcd2	1704	pentatricopeptide repeat domain 2 [Source:MGI Symbol;Acc:MGI:1916177]	-1.98998	0.00291099	0.0418048	6.20027	2.51876
ENSMUSG00000037982	Gm9725	2860	predicted gene 9725 [Source:MGI Symbol;Acc:MGI:3646552]	11.8969	0.00291766	0.0418411	0.0734117	0.676768
ENSMUSG00000002814	Top3a	4599	topoisomerase (DNA) III alpha [Source:MGI Symbol;Acc:MGI:1197527]	-1.88812	0.00291817	0.0418411	2.89455	1.24039
ENSMUSG00000026896	Ifih1	8165	interferon induced with helicase C domain 1 [Source:MGI Symbol;Acc:MGI:1918836]	3.26216	0.00292173	0.0418588	0.33399	0.895757
ENSMUSG00000022749	Tbc1d23	9802	TBC1 domain family, member 23 [Source:MGI Symbol;Acc:MGI:1914831]	-1.59817	0.0029252	0.0418751	4.50112	2.24492
ENSMUSG00000058881	Zfp516	8275	zinc finger protein 516 [Source:MGI Symbol;Acc:MGI:2443957]	1.41268	0.00295311	0.042241	6.44241	7.31071
ENSMUSG00000056019	Zfp709	7954	zinc finger protein 709 [Source:MGI Symbol;Acc:MGI:2384299]	-2.6986	0.00296076	0.0423168	1.21479	0.365051
ENSMUSG00000024529	Lox	4778	lysyl oxidase [Source:MGI Symbol;Acc:MGI:96817]	10.3952	0.00296542	0.0423497	0.418971	3.53487
ENSMUSG00000047098	Rnf31	5734	ring finger protein 31 [Source:MGI Symbol;Acc:MGI:1934704]	2.1027	0.00297076	0.0423923	2.7657	4.56868
ENSMUSG00000026107	Nabp1	8498	nucleic acid binding protein 1 [Source:MGI Symbol;Acc:MGI:1923258]	3.55516	0.0029758	0.0424151	1.16837	3.3235
ENSMUSG00000078922	Tgtp1	3205	T cell specific GTPase 1 [Source:MGI Symbol;Acc:MGI:98734]	174.565	0.00297973	0.0424151	0	0.275593
ENSMUSG00000024096	Ralbp1	4790	ralA binding protein 1 [Source:MGI Symbol;Acc:MGI:108466]	-1.5	0.00298176	0.0424151	16.5375	8.92373
ENSMUSG00000028698	Pik3r3	5300	phosphoinositide-3-kinase regulatory subunit 3 [Source:MGI Symbol;Acc:MGI:109277]	-1.83645	0.0029818	0.0424151	5.98403	2.64666
ENSMUSG00000020178	Adora2a	3062	adenosine A2a receptor [Source:MGI Symbol;Acc:MGI:99402]	48.2193	0.00299026	0.0425018	0.00492413	0.255767
ENSMUSG00000039050	Osbpl2	4187	oxysterol binding protein-like 2 [Source:MGI Symbol;Acc:MGI:2442832]	-1.64926	0.00299489	0.0425341	9.08084	4.44851
ENSMUSG00000064368	mt-Nd6	519	mitochondrially encoded NADH dehydrogenase 6 [Source:MGI Symbol;Acc:MGI:102495]	1.75439	0.00300138	0.0425925	306.161	429.299
ENSMUSG00000045205	Dpy19l4	8101	dpy-19-like 4 (C. elegans) [Source:MGI Symbol;Acc:MGI:2685869]	-1.4842	0.00301253	0.042692	6.1322	3.34331
ENSMUSG00000054555	Adam12	10573	a disintegrin and metallopeptidase domain 12 (meltrin alpha) [Source:MGI Symbol;Acc:MGI:105378]	2.31277	0.00301502	0.042692	0.357019	0.655886
ENSMUSG00000019143	Hars2	4279	histidyl-tRNA synthetase 2 [Source:MGI Symbol;Acc:MGI:1918041]	-1.77262	0.00301551	0.042692	3.03689	1.38835
ENSMUSG00000048799	Cep120	6861	centrosomal protein 120 [Source:MGI Symbol;Acc:MGI:2147298]	1.42939	0.00302566	0.0427808	6.59869	7.55112
ENSMUSG00000034614	Pik3ip1	4272	phosphoinositide-3-kinase interacting protein 1 [Source:MGI Symbol;Acc:MGI:1917016]	-2.93539	0.00302694	0.0427808	5.19305	1.41433
ENSMUSG00000024491	Rbm27	6643	RNA binding motif protein 27 [Source:MGI Symbol;Acc:MGI:2147194]	1.49891	0.00302892	0.0427808	10.2193	12.2873
ENSMUSG00000061650	Med9	1920	mediator complex subunit 9 [Source:MGI Symbol;Acc:MGI:2183151]	-1.75313	0.0030326	0.0427991	8.93081	4.13602
ENSMUSG00000026874	Hc	6265	hemolytic complement [Source:MGI Symbol;Acc:MGI:96031]	185.734	0.00303713	0.042823	0	0.149259
ENSMUSG00000111089	Gm49427	566	predicted gene, 49427 [Source:MGI Symbol;Acc:MGI:6155063]	62.3391	0.00303905	0.042823	0.0267058	1.84014
ENSMUSG00000008855	Hdac5	8780	histone deacetylase 5 [Source:MGI Symbol;Acc:MGI:1333784]	1.92031	0.00304694	0.0428904	5.09252	7.79347
ENSMUSG00000030043	Tacr1	6491	tachykinin receptor 1 [Source:MGI Symbol;Acc:MGI:98475]	1.59891	0.00304861	0.0428904	18.1359	23.1217
ENSMUSG00000022550	Adck5	3633	aarF domain containing kinase 5 [Source:MGI Symbol;Acc:MGI:2679274]	-2.18114	0.00305918	0.0430056	2.68433	0.987404
ENSMUSG00000031934	Panx1	6030	pannexin 1 [Source:MGI Symbol;Acc:MGI:1860055]	3.59179	0.00307518	0.0431967	0.239074	0.689643
ENSMUSG00000030393	Zik1	4199	zinc finger protein interacting with K protein 1 [Source:MGI Symbol;Acc:MGI:108070]	-2.22974	0.00308693	0.0433278	2.56107	0.949089
ENSMUSG00000058152	Chsy3	7228	chondroitin sulfate synthase 3 [Source:MGI Symbol;Acc:MGI:1926173]	2.59777	0.00309201	0.0433653	0.533931	1.11156
ENSMUSG00000035948	Acss3	7196	acyl-CoA synthetase short-chain family member 3 [Source:MGI Symbol;Acc:MGI:2685720]	-1.57632	0.00310752	0.0435465	4.88823	2.51201
ENSMUSG00000072774	Zfp951	4730	zinc finger protein 951 [Source:MGI Symbol;Acc:MGI:2441896]	-2.78055	0.00310977	0.0435465	1.83769	0.52304
ENSMUSG00000021133	Susd6	7615	sushi domain containing 6 [Source:MGI Symbol;Acc:MGI:2444661]	1.66235	0.00313835	0.0439016	3.49541	4.64449
ENSMUSG00000040359	Ufl1	5706	UFM1 specific ligase 1 [Source:MGI Symbol;Acc:MGI:1914740]	-1.42225	0.00314001	0.0439016	9.13706	5.20434
ENSMUSG00000033294	Noc4l	2596	NOC4 like [Source:MGI Symbol;Acc:MGI:2140843]	2.35859	0.00314947	0.0439701	2.19912	4.13915
ENSMUSG00000053279	Aldh1a1	4937	aldehyde dehydrogenase family 1, subfamily A1 [Source:MGI Symbol;Acc:MGI:1353450]	-1.6744	0.00314981	0.0439701	172.425	84.6569
ENSMUSG00000061689	Dlgap4	8451	DLG associated protein 4 [Source:MGI Symbol;Acc:MGI:2138865]	1.46154	0.00315394	0.0439937	6.37539	7.45635
ENSMUSG00000029613	Eif2ak1	5670	eukaryotic translation initiation factor 2 alpha kinase 1 [Source:MGI Symbol;Acc:MGI:1353448]	-1.48491	0.00316283	0.0440834	5.91789	3.21744
ENSMUSG00000010660	Plcd1	3093	phospholipase C, delta 1 [Source:MGI Symbol;Acc:MGI:97614]	2.53535	0.00317084	0.044161	2.50117	5.00254
ENSMUSG00000027188	Pamr1	6046	peptidase domain containing associated with muscle regeneration 1 [Source:MGI Symbol;Acc:MGI:2445082]	5.81873	0.00318603	0.0443121	0.150647	0.695446
ENSMUSG00000114104	Gm47585	2312	predicted gene, 47585 [Source:MGI Symbol;Acc:MGI:6096625]	3.22401	0.00318996	0.0443121	1.08522	2.75907
ENSMUSG00000087174	5530601H04Rik	9005	RIKEN cDNA 5530601H04 gene [Source:MGI Symbol;Acc:MGI:1918695]	-2.84147	0.00319099	0.0443121	1.16556	0.3326
ENSMUSG00000037370	Enpp1	10257	ectonucleotide pyrophosphatase/phosphodiesterase 1 [Source:MGI Symbol;Acc:MGI:97370]	-1.6411	0.00319155	0.0443121	3.71526	1.84259
ENSMUSG00000018401	Mtmr4	6240	myotubularin related protein 4 [Source:MGI Symbol;Acc:MGI:2180699]	-1.45557	0.00319639	0.0443236	7.80941	4.32537
ENSMUSG00000026662	Sephs1	5925	selenophosphate synthetase 1 [Source:MGI Symbol;Acc:MGI:1923580]	-1.52867	0.00319731	0.0443236	5.54666	2.93011
ENSMUSG00000093460	Six3os1	11884	SIX homeobox 3, opposite strand 1 [Source:MGI Symbol;Acc:MGI:1925118]	-1.63222	0.00320578	0.0444067	14.8187	7.29063
ENSMUSG00000064370	mt-Cytb	1144	mitochondrially encoded cytochrome b [Source:MGI Symbol;Acc:MGI:102501]	1.68526	0.00321395	0.0444516	1573.97	2130.88
ENSMUSG00000026072	Il1r1	6363	interleukin 1 receptor, type I [Source:MGI Symbol;Acc:MGI:96545]	4.83668	0.00321442	0.0444516	1.8133	7.108
ENSMUSG00000029163	Emilin1	4937	elastin microfibril interfacer 1 [Source:MGI Symbol;Acc:MGI:1926189]	2.12828	0.00321644	0.0444516	6.48527	11.1766
ENSMUSG00000055737	Ghr	9053	growth hormone receptor [Source:MGI Symbol;Acc:MGI:95708]	1.57041	0.00323168	0.044628	1.27446	1.61474
ENSMUSG00000037235	Mxd4	8483	Max dimerization protein 4 [Source:MGI Symbol;Acc:MGI:104991]	-1.71545	0.0032342	0.0446285	4.93874	2.32288
ENSMUSG00000024381	Bin1	4117	bridging integrator 1 [Source:MGI Symbol;Acc:MGI:108092]	1.74533	0.00323951	0.0446655	9.83716	13.7822
ENSMUSG00000063362	Alg11	4960	asparagine-linked glycosylation 11 (alpha-1,2-mannosyltransferase) [Source:MGI Symbol;Acc:MGI:2142632]	-1.72409	0.00324185	0.0446655	3.82567	1.80802
ENSMUSG00000056952	Tatdn2	3548	TatD DNase domain containing 2 [Source:MGI Symbol;Acc:MGI:3576210]	1.41969	0.00326158	0.0448846	19.0748	21.6498
ENSMUSG00000022075	Rhobtb2	10124	Rho-related BTB domain containing 2 [Source:MGI Symbol;Acc:MGI:2180557]	-1.43586	0.00326275	0.0448846	12.6801	7.1279
ENSMUSG00000042759	Apobr	3779	apolipoprotein B receptor [Source:MGI Symbol;Acc:MGI:2176230]	3.67526	0.00327595	0.0450318	0.153054	0.449347
ENSMUSG00000029478	Ncor2	10490	nuclear receptor co-repressor 2 [Source:MGI Symbol;Acc:MGI:1337080]	1.54131	0.00328249	0.045074	34.5654	42.4419
ENSMUSG00000056260	Lrif1	9192	ligand dependent nuclear receptor interacting factor 1 [Source:MGI Symbol;Acc:MGI:2445214]	-1.73991	0.00328404	0.045074	2.03074	0.942428
ENSMUSG00000020189	Osbpl8	9600	oxysterol binding protein-like 8 [Source:MGI Symbol;Acc:MGI:2443807]	1.41104	0.00328806	0.0450948	6.23757	7.07877
ENSMUSG00000057329	Bcl2	9157	B cell leukemia/lymphoma 2 [Source:MGI Symbol;Acc:MGI:88138]	-1.63926	0.00329701	0.0451831	3.48738	1.73494
ENSMUSG00000031221	Igbp1	5717	immunoglobulin (CD79A) binding protein 1 [Source:MGI Symbol;Acc:MGI:1346500]	-1.49516	0.00330642	0.0452775	8.40401	4.55805
ENSMUSG00000028329	Xpa	1894	xeroderma pigmentosum, complementation group A [Source:MGI Symbol;Acc:MGI:99135]	-1.78985	0.00331234	0.0453242	8.56276	3.85924
ENSMUSG00000026135	Zfp142	11355	zinc finger protein 142 [Source:MGI Symbol;Acc:MGI:1924514]	1.65335	0.00331712	0.045355	3.18646	4.22012
ENSMUSG00000015944	Castor2	7560	cytosolic arginine sensor for mTORC1 subunit 2 [Source:MGI Symbol;Acc:MGI:1933384]	-1.59043	0.00332144	0.0453796	6.86861	3.4846
ENSMUSG00000029111	Nelfa	3947	negative elongation factor complex member A, Whsc2 [Source:MGI Symbol;Acc:MGI:1346098]	-1.70429	0.00332986	0.04546	4.76276	2.26529
ENSMUSG00000030782	Tgfb1i1	5585	transforming growth factor beta 1 induced transcript 1 [Source:MGI Symbol;Acc:MGI:102784]	2.23725	0.00334102	0.0455777	1.02053	1.85274
ENSMUSG00000039678	Tbc1d13	4719	TBC1 domain family, member 13 [Source:MGI Symbol;Acc:MGI:2385326]	-1.55227	0.00334873	0.0456484	5.40752	2.81662
ENSMUSG00000037685	Atp8a1	14278	ATPase, aminophospholipid transporter (APLT), class I, type 8A, member 1 [Source:MGI Symbol;Acc:MGI:1330848]	1.5062	0.00335684	0.0456945	4.61038	5.5384
ENSMUSG00000043831	Lysmd4	5121	LysM, putative peptidoglycan-binding, domain containing 4 [Source:MGI Symbol;Acc:MGI:1922349]	-3.86054	0.00335746	0.0456945	1.71023	0.365045
ENSMUSG00000002617	Zfp40	4482	zinc finger protein 40 [Source:MGI Symbol;Acc:MGI:99185]	-2.1894	0.00335974	0.0456945	3.04868	1.09658
ENSMUSG00000074212	Dnajb14	15741	DnaJ heat shock protein family (Hsp40) member B14 [Source:MGI Symbol;Acc:MGI:1917854]	-1.54221	0.00336893	0.0457848	3.08135	1.63364
ENSMUSG00000096014	Sox1	4832	SRY (sex determining region Y)-box 1 [Source:MGI Symbol;Acc:MGI:98357]	-1.62208	0.00338193	0.0458948	17.7345	8.72684
ENSMUSG00000102448	Gm37101	3660	predicted gene, 37101 [Source:MGI Symbol;Acc:MGI:5610329]	-4.9795	0.00338344	0.0458948	0.828619	0.129654
ENSMUSG00000031668	Eif2ak3	6026	eukaryotic translation initiation factor 2 alpha kinase 3 [Source:MGI Symbol;Acc:MGI:1341830]	-1.55971	0.00338468	0.0458948	6.36575	3.31413
ENSMUSG00000020492	Ska2	3272	spindle and kinetochore associated complex subunit 2 [Source:MGI Symbol;Acc:MGI:1913390]	-2.35467	0.00339051	0.0459196	3.97579	1.37157
ENSMUSG00000106961	Gm43128	1621	predicted gene 43128 [Source:MGI Symbol;Acc:MGI:5663265]	4.35695	0.00339162	0.0459196	0.526736	1.84771
ENSMUSG00000043953	Ccrl2	2598	chemokine (C-C motif) receptor-like 2 [Source:MGI Symbol;Acc:MGI:1920904]	7.04036	0.003401	0.046012	0.140749	0.796365
ENSMUSG00000064363	mt-Nd4	1378	mitochondrially encoded NADH dehydrogenase 4 [Source:MGI Symbol;Acc:MGI:102498]	1.72163	0.00340393	0.0460171	467.406	646.531
ENSMUSG00000028458	Tesk1	4434	testis specific protein kinase 1 [Source:MGI Symbol;Acc:MGI:1201675]	1.56483	0.00341201	0.0460685	4.97099	6.32949
ENSMUSG00000029925	Tbxas1	9094	thromboxane A synthase 1, platelet [Source:MGI Symbol;Acc:MGI:98497]	2.94151	0.00341473	0.0460685	0.190609	0.449814
ENSMUSG00000022604	Cep97	9163	centrosomal protein 97 [Source:MGI Symbol;Acc:MGI:1921451]	-1.9797	0.00341542	0.0460685	1.3409	0.550011
ENSMUSG00000040663	Clcf1	3806	cardiotrophin-like cytokine factor 1 [Source:MGI Symbol;Acc:MGI:1930088]	3.95424	0.0034247	0.0461458	3.75847	11.7238
ENSMUSG00000025746	Il6	2428	interleukin 6 [Source:MGI Symbol;Acc:MGI:96559]	149.031	0.00342789	0.0461458	0.0690179	8.55266
ENSMUSG00000026655	Fam107b	4329	family with sequence similarity 107, member B [Source:MGI Symbol;Acc:MGI:1913790]	1.61622	0.0034308	0.0461458	32.651	42.8374
ENSMUSG00000037035	Inhbb	4255	inhibin beta-B [Source:MGI Symbol;Acc:MGI:96571]	2.39606	0.00343142	0.0461458	2.3235	4.40873
ENSMUSG00000021196	Pfkp	13401	phosphofructokinase, platelet [Source:MGI Symbol;Acc:MGI:1891833]	1.6374	0.00345294	0.0463417	16.6071	21.6547
ENSMUSG00000091017	Fam71a	2234	family with sequence similarity 71, member A [Source:MGI Symbol;Acc:MGI:3588202]	12.9733	0.00345308	0.0463417	0.440133	4.51104
ENSMUSG00000041895	Wipi1	4410	WD repeat domain, phosphoinositide interacting 1 [Source:MGI Symbol;Acc:MGI:1261864]	-1.43261	0.00345786	0.0463417	18.2005	10.2045
ENSMUSG00000113998	Gm40909	5564	predicted gene, 40909 [Source:MGI Symbol;Acc:MGI:5623794]	24.4679	0.003458	0.0463417	0.00544121	0.129824
ENSMUSG00000006215	Zbtb17	3877	zinc finger and BTB domain containing 17 [Source:MGI Symbol;Acc:MGI:107410]	1.53815	0.00345887	0.0463417	4.71748	5.82178
ENSMUSG00000005882	Uqcc1	6044	ubiquinol-cytochrome c reductase complex assembly factor 1 [Source:MGI Symbol;Acc:MGI:1929472]	-1.54474	0.00348631	0.0466433	4.15965	2.18136
ENSMUSG00000087263	Gm15726	509	predicted gene 15726 [Source:MGI Symbol;Acc:MGI:3783169]	29.1342	0.00348782	0.0466433	0.330842	8.16771
ENSMUSG00000020262	Adarb1	11272	adenosine deaminase, RNA-specific, B1 [Source:MGI Symbol;Acc:MGI:891999]	1.60894	0.00348917	0.0466433	4.62687	6.03941
ENSMUSG00000030533	Unc45a	9263	unc-45 myosin chaperone A [Source:MGI Symbol;Acc:MGI:2142246]	1.46061	0.00349621	0.0467027	4.6367	5.42711
ENSMUSG00000048186	Bend7	4194	BEN domain containing 7 [Source:MGI Symbol;Acc:MGI:2443100]	-1.72644	0.00350191	0.0467381	3.62871	1.70255
ENSMUSG00000021838	Samd4	8658	sterile alpha motif domain containing 4 [Source:MGI Symbol;Acc:MGI:1921730]	1.99257	0.00350627	0.0467381	9.55496	15.0815
ENSMUSG00000041870	Ankrd13a	5983	ankyrin repeat domain 13a [Source:MGI Symbol;Acc:MGI:1915670]	1.49714	0.00350666	0.0467381	4.54885	5.52541
ENSMUSG00000099364	5730419F03Rik	2092	RIKEN cDNA 5730419F03 gene [Source:MGI Symbol;Acc:MGI:1917787]	4.64975	0.00350949	0.0467413	0.370406	1.42074
ENSMUSG00000015619	Gata3	3978	GATA binding protein 3 [Source:MGI Symbol;Acc:MGI:95663]	-2.70473	0.00351273	0.0467498	3.67617	1.11081
ENSMUSG00000113812	Gm48699	1525	predicted gene, 48699 [Source:MGI Symbol;Acc:MGI:6098334]	-116.276	0.00351668	0.0467677	0.4611	0
ENSMUSG00000020184	Mdm2	5083	transformed mouse 3T3 cell double minute 2 [Source:MGI Symbol;Acc:MGI:96952]	1.44796	0.00352653	0.046864	8.47833	9.9417
ENSMUSG00000037185	Krt80	6393	keratin 80 [Source:MGI Symbol;Acc:MGI:1921377]	2.96559	0.00353746	0.0469745	0.243747	0.588907
ENSMUSG00000024695	Zfp91	9199	zinc finger protein 91 [Source:MGI Symbol;Acc:MGI:104854]	-1.48397	0.00355746	0.0472052	6.12123	3.34445
ENSMUSG00000097217	Gm26549	1207	predicted gene, 26549 [Source:MGI Symbol;Acc:MGI:5477043]	3.03559	0.00356087	0.0472156	2.06381	5.04164
ENSMUSG00000096054	Syne1	40491	spectrin repeat containing, nuclear envelope 1 [Source:MGI Symbol;Acc:MGI:1927152]	1.66711	0.00356694	0.0472613	4.96474	6.65085
ENSMUSG00000087230	Mroh3	3230	maestro heat-like repeat family member 3 [Source:MGI Symbol;Acc:MGI:1923672]	58.9494	0.00357302	0.0472867	0	0.0928775
ENSMUSG00000060397	Zfp128	4087	zinc finger protein 128 [Source:MGI Symbol;Acc:MGI:2389445]	-2.71618	0.00357429	0.0472867	1.24938	0.371902
ENSMUSG00000054770	Kctd18	12973	potassium channel tetramerisation domain containing 18 [Source:MGI Symbol;Acc:MGI:3603813]	-2.08555	0.00357675	0.0472867	1.3136	0.511303
ENSMUSG00000027340	Slc23a2	7951	solute carrier family 23 (nucleobase transporters), member 2 [Source:MGI Symbol;Acc:MGI:1859682]	1.80452	0.00358006	0.0472958	4.61877	6.71049
ENSMUSG00000040667	Nup88	8144	nucleoporin 88 [Source:MGI Symbol;Acc:MGI:104900]	-1.51357	0.00358493	0.0473252	5.2236	2.80131
ENSMUSG00000107468	5730507A11Rik	3371	RIKEN cDNA 5730507A11 gene [Source:MGI Symbol;Acc:MGI:1917874]	-4.05965	0.00359341	0.0473776	1.60557	0.318593
ENSMUSG00000029050	Ski	5562	ski sarcoma viral oncogene homolog (avian) [Source:MGI Symbol;Acc:MGI:98310]	1.4218	0.00359416	0.0473776	19.3042	21.9627
ENSMUSG00000038467	Chmp4b	2027	charged multivesicular body protein 4B [Source:MGI Symbol;Acc:MGI:1922858]	1.46983	0.0036055	0.0474923	66.2632	79.1157
ENSMUSG00000020834	Dhrs13	1967	dehydrogenase/reductase (SDR family) member 13 [Source:MGI Symbol;Acc:MGI:1917701]	2.38556	0.00360938	0.0475085	1.63645	3.16228
ENSMUSG00000115150	Gm10370	1714	predicted gene 10370 [Source:MGI Symbol;Acc:MGI:3642773]	-207.313	0.00361628	0.0475645	0.739565	0
ENSMUSG00000047143	Dmrta2	2922	doublesex and mab-3 related transcription factor like family A2 [Source:MGI Symbol;Acc:MGI:2653629]	-1.48468	0.00362789	0.0476823	18.9218	10.2091
ENSMUSG00000063234	Gpr84	1725	G protein-coupled receptor 84 [Source:MGI Symbol;Acc:MGI:1934129]	20.2094	0.00363145	0.0476943	0.0262992	0.50046
ENSMUSG00000030849	Fgfr2	10328	fibroblast growth factor receptor 2 [Source:MGI Symbol;Acc:MGI:95523]	1.59529	0.00364417	0.0477988	31.4161	39.9499
ENSMUSG00000025255	Zfhx4	15737	zinc finger homeodomain 4 [Source:MGI Symbol;Acc:MGI:2137668]	-1.53468	0.00364473	0.0477988	23.2395	12.17
ENSMUSG00000002396	Ocel1	7133	occludin/ELL domain containing 1 [Source:MGI Symbol;Acc:MGI:1924340]	2.80718	0.00365098	0.047812	0.350434	0.798286
ENSMUSG00000022906	Parp9	4872	poly (ADP-ribose) polymerase family, member 9 [Source:MGI Symbol;Acc:MGI:1933117]	2.36527	0.00365143	0.047812	1.13945	2.19333
ENSMUSG00000020719	Ddx5	5775	DEAD (Asp-Glu-Ala-Asp) box polypeptide 5 [Source:MGI Symbol;Acc:MGI:105037]	1.50942	0.00365371	0.047812	121.382	148.368
ENSMUSG00000110419	AW046200	3082	expressed sequence AW046200 [Source:MGI Symbol;Acc:MGI:2142745]	2.95482	0.00366234	0.0478901	1.2622	2.9662
ENSMUSG00000105201	Gm43362	2470	predicted gene 43362 [Source:MGI Symbol;Acc:MGI:5663499]	2.32951	0.0036793	0.0480769	1.49587	2.80006
ENSMUSG00000051316	Taf7	3302	TATA-box binding protein associated factor 7 [Source:MGI Symbol;Acc:MGI:1346348]	1.72875	0.00370105	0.048326	9.73439	13.651
ENSMUSG00000037868	Egr2	3398	early growth response 2 [Source:MGI Symbol;Acc:MGI:95296]	7.61352	0.00370713	0.0483702	0.878467	5.49235
ENSMUSG00000016496	Cd274	3622	CD274 antigen [Source:MGI Symbol;Acc:MGI:1926446]	10.3953	0.00371079	0.0483829	1.20937	10.0926
ENSMUSG00000111652	Gm48726	2529	predicted gene, 48726 [Source:MGI Symbol;Acc:MGI:6098384]	145.541	0.00371807	0.0484426	0	0.28495
ENSMUSG00000024737	Slc15a3	5491	solute carrier family 15, member 3 [Source:MGI Symbol;Acc:MGI:1929691]	5.80549	0.00372908	0.048551	0.0567494	0.263235
ENSMUSG00000024899	Papss2	3721	3'-phosphoadenosine 5'-phosphosulfate synthase 2 [Source:MGI Symbol;Acc:MGI:1330223]	3.65901	0.00373515	0.0485947	1.59295	4.73707
ENSMUSG00000050578	Mmp13	2673	matrix metallopeptidase 13 [Source:MGI Symbol;Acc:MGI:1340026]	25.3701	0.00373824	0.0485998	0.0113351	0.27412
ENSMUSG00000047371	Zfp768	2522	zinc finger protein 768 [Source:MGI Symbol;Acc:MGI:2384582]	-1.61505	0.00374327	0.0486301	7.28028	3.63985
ENSMUSG00000022905	Kpna1	8486	karyopherin (importin) alpha 1 [Source:MGI Symbol;Acc:MGI:103560]	1.38171	0.00375572	0.0487566	10.0953	11.2039
ENSMUSG00000057181	5730455P16Rik	4842	RIKEN cDNA 5730455P16 gene [Source:MGI Symbol;Acc:MGI:1917841]	-1.59396	0.00376404	0.0488293	5.40508	2.75737
ENSMUSG00000019817	Plagl1	7819	pleiomorphic adenoma gene-like 1 [Source:MGI Symbol;Acc:MGI:1100874]	1.72786	0.00376953	0.0488653	2.51658	3.52937
ENSMUSG00000025083	Afap1l2	5675	actin filament associated protein 1-like 2 [Source:MGI Symbol;Acc:MGI:2147658]	-1.93792	0.00377686	0.0489141	5.85116	2.40525
ENSMUSG00000068245	Phf11d	4498	PHD finger protein 11D [Source:MGI Symbol;Acc:MGI:1277133]	2.58234	0.00377873	0.0489141	0.438177	0.919468
ENSMUSG00000088609	Gm24187	57	predicted gene, 24187 [Source:MGI Symbol;Acc:MGI:5453964]	1.61656	0.00378287	0.0489324	3214.99	4131.27
ENSMUSG00000027620	Rbm39	6946	RNA binding motif protein 39 [Source:MGI Symbol;Acc:MGI:2157953]	1.38521	0.00378845	0.0489693	42.6775	47.4313
ENSMUSG00000028893	Sesn2	3475	sestrin 2 [Source:MGI Symbol;Acc:MGI:2651874]	2.77096	0.00380117	0.0490984	0.704675	1.57736
ENSMUSG00000059456	Ptk2b	7398	PTK2 protein tyrosine kinase 2 beta [Source:MGI Symbol;Acc:MGI:104908]	2.41259	0.00381112	0.0491832	2.18646	4.34043
ENSMUSG00000031994	Adamts8	4613	a disintegrin-like and metallopeptidase (reprolysin type) with thrombospondin type 1 motif, 8 [Source:MGI Symbol;Acc:MGI:1353468]	8.07714	0.0038132	0.0491832	0.117135	0.757331
ENSMUSG00000016503	Gtf3a	2548	general transcription factor III A [Source:MGI Symbol;Acc:MGI:1913846]	-1.87567	0.00381984	0.0492335	4.20398	1.8097
ENSMUSG00000026311	Asb1	6432	ankyrin repeat and SOCS box-containing 1 [Source:MGI Symbol;Acc:MGI:1929735]	-1.69741	0.00382588	0.0492761	2.59901	1.24297
ENSMUSG00000038332	Sesn1	3982	sestrin 1 [Source:MGI Symbol;Acc:MGI:2155278]	-1.8886	0.00382889	0.0492794	13.9227	5.98035
ENSMUSG00000066798	Zbtb6	5080	zinc finger and BTB domain containing 6 [Source:MGI Symbol;Acc:MGI:2442998]	-1.67437	0.00387049	0.0497793	3.48414	1.69148
ENSMUSG00000071180	Smim15	2208	small integral membrane protein 15 [Source:MGI Symbol;Acc:MGI:1922866]	-1.92925	0.0038846	0.049925	8.12864	3.46802
ENSMUSG00000025287	Acot9	2273	acyl-CoA thioesterase 9 [Source:MGI Symbol;Acc:MGI:1928939]	1.86528	0.00389153	0.0499387	4.13308	6.23102
ENSMUSG00000040813	Tex264	2874	testis expressed gene 264 [Source:MGI Symbol;Acc:MGI:1096570]	1.62358	0.00389333	0.0499387	9.37523	12.3151
ENSMUSG00000022361	Zhx1	6031	zinc fingers and homeoboxes 1 [Source:MGI Symbol;Acc:MGI:109271]	-1.63444	0.00389423	0.0499387	8.27438	4.11624
ENSMUSG00000047694	Yipf6	7149	Yip1 domain family, member 6 [Source:MGI Symbol;Acc:MGI:1925179]	-1.52313	0.00389842	0.0499387	5.39481	2.87092
ENSMUSG00000026977	March7	10391	membrane-associated ring finger (C3HC4) 7 [Source:MGI Symbol;Acc:MGI:1931053]	1.39374	0.00389956	0.0499387	6.02687	6.78507
ENSMUSG00000068391	Chrac1	2353	chromatin accessibility complex 1 [Source:MGI Symbol;Acc:MGI:2135796]	-1.8956	0.00390437	0.0499648	10.2425	4.43229
ENSMUSG00000046351	Zfp322a	6263	zinc finger protein 322A [Source:MGI Symbol;Acc:MGI:2442566]	-1.66949	0.00390954	0.0499954	2.43558	1.17413
ENSMUSG00000030536	Iqgap1	16538	IQ motif containing GTPase activating protein 1 [Source:MGI Symbol;Acc:MGI:1352757]	1.4719	0.00392832	0.0501738	7.46815	8.86706
ENSMUSG00000043668	Tox3	3356	TOX high mobility group box family member 3 [Source:MGI Symbol;Acc:MGI:3039593]	-1.67736	0.0039291	0.0501738	12.5216	5.97242
ENSMUSG00000027660	Skil	9694	SKI-like [Source:MGI Symbol;Acc:MGI:106203]	1.69623	0.00393186	0.0501738	14.763	20.2634
ENSMUSG00000055805	Fmnl1	4886	formin-like 1 [Source:MGI Symbol;Acc:MGI:1888994]	2.77292	0.00393518	0.0501806	0.437121	0.99511
ENSMUSG00000024533	Spire1	7766	spire type actin nucleation factor 1 [Source:MGI Symbol;Acc:MGI:1915416]	1.60189	0.00394193	0.050231	4.33474	5.58071
ENSMUSG00000004347	Pde1c	20520	phosphodiesterase 1C [Source:MGI Symbol;Acc:MGI:108413]	1.65745	0.00396721	0.0505173	4.64421	6.18278
ENSMUSG00000097028	Ptgs2os	4330	prostaglandin-endoperoxide synthase 2, opposite strand [Source:MGI Symbol;Acc:MGI:2443180]	25.9383	0.00397216	0.0505382	0.00695211	0.170601
ENSMUSG00000031631	Cfap97	5157	cilia and flagella associated protein 97 [Source:MGI Symbol;Acc:MGI:1914006]	-1.64142	0.00397448	0.0505382	3.57918	1.76871
ENSMUSG00000059263	Usp47	13755	ubiquitin specific peptidase 47 [Source:MGI Symbol;Acc:MGI:1922246]	1.44162	0.00398021	0.0505754	16.6164	19.4411
ENSMUSG00000028648	Ndufs5	860	NADH:ubiquinone oxidoreductase core subunit S5 [Source:MGI Symbol;Acc:MGI:1890889]	-1.66577	0.00398594	0.0506015	33.3307	16.3564
ENSMUSG00000037058	Paip2	3541	polyadenylate-binding protein-interacting protein 2 [Source:MGI Symbol;Acc:MGI:1915119]	-1.44214	0.00399179	0.0506015	16.4942	9.29553
ENSMUSG00000059689	Zfp637	2565	zinc finger protein 637 [Source:MGI Symbol;Acc:MGI:2448537]	-2.29434	0.00399183	0.0506015	3.24598	1.16381
ENSMUSG00000021068	Nin	17005	ninein [Source:MGI Symbol;Acc:MGI:105108]	1.57449	0.00399353	0.0506015	3.56117	4.475
ENSMUSG00000022893	Adamts1	5302	a disintegrin-like and metallopeptidase (reprolysin type) with thrombospondin type 1 motif, 1 [Source:MGI Symbol;Acc:MGI:109249]	4.65522	0.0040263	0.0508897	32.0519	120.787
ENSMUSG00000035107	Dcbld2	8401	discoidin, CUB and LCCL domain containing 2 [Source:MGI Symbol;Acc:MGI:1920629]	1.82734	0.00402669	0.0508897	6.09117	8.97068
ENSMUSG00000050890	Pdik1l	5810	PDLIM1 interacting kinase 1 like [Source:MGI Symbol;Acc:MGI:2385213]	-1.92388	0.00402679	0.0508897	2.31715	0.987678
ENSMUSG00000037640	Zfp60	8390	zinc finger protein 60 [Source:MGI Symbol;Acc:MGI:99207]	-2.3055	0.00402789	0.0508897	1.95355	0.699707
ENSMUSG00000042369	Rbm45	1898	RNA binding motif protein 45 [Source:MGI Symbol;Acc:MGI:2387367]	1.49339	0.00403059	0.0508897	10.7377	12.9295
ENSMUSG00000020707	Rnf135	2140	ring finger protein 135 [Source:MGI Symbol;Acc:MGI:1919206]	-2.75918	0.00403325	0.0508897	1.61545	0.465442
ENSMUSG00000054150	Syne3	5548	spectrin repeat containing, nuclear envelope family member 3 [Source:MGI Symbol;Acc:MGI:2442408]	1.723	0.0040458	0.050992	6.03566	8.35178
ENSMUSG00000046807	Lrrc75b	4603	leucine rich repeat containing 75B [Source:MGI Symbol;Acc:MGI:2143657]	-2.20022	0.00404891	0.050992	10.8097	3.99291
ENSMUSG00000069755	Zfp125	3109	zinc finger protein 125 [Source:MGI Symbol;Acc:MGI:1336211]	-2.73017	0.00405414	0.050992	1.36102	0.403758
ENSMUSG00000039328	Rnf122	9012	ring finger protein 122 [Source:MGI Symbol;Acc:MGI:1916117]	7.75951	0.00405981	0.050992	0.79412	4.88935
ENSMUSG00000057367	Birc2	4580	baculoviral IAP repeat-containing 2 [Source:MGI Symbol;Acc:MGI:1197009]	1.64666	0.00406019	0.050992	10.6721	14.0874
ENSMUSG00000015597	Zfp318	13804	zinc finger protein 318 [Source:MGI Symbol;Acc:MGI:1889348]	-1.38743	0.00406027	0.050992	4.07858	2.37311
ENSMUSG00000106970	Gm43377	455	predicted gene 43377 [Source:MGI Symbol;Acc:MGI:5663514]	-2.35609	0.00406121	0.050992	23.5731	7.97299
ENSMUSG00000031819	Emc8	6295	ER membrane protein complex subunit 8 [Source:MGI Symbol;Acc:MGI:1343095]	-1.48256	0.00407112	0.0510808	7.86167	4.24045
ENSMUSG00000003411	Rab3b	3524	RAB3B, member RAS oncogene family [Source:MGI Symbol;Acc:MGI:1917158]	-2.00239	0.00407569	0.0511024	11.2278	4.62053
ENSMUSG00000030666	Calcb	1264	calcitonin-related polypeptide, beta [Source:MGI Symbol;Acc:MGI:2151254]	65.4294	0.00408326	0.0511617	0	0.241439
ENSMUSG00000031889	D230025D16Rik	4704	RIKEN cDNA D230025D16 gene [Source:MGI Symbol;Acc:MGI:2443049]	-2.13973	0.00411594	0.0515353	1.85055	0.685738
ENSMUSG00000006463	Zdhhc24	2916	zinc finger, DHHC domain containing 24 [Source:MGI Symbol;Acc:MGI:1917855]	-1.63048	0.00411965	0.0515458	7.83936	3.89327
ENSMUSG00000020366	Mapk9	6784	mitogen-activated protein kinase 9 [Source:MGI Symbol;Acc:MGI:1346862]	-1.54402	0.00412968	0.0516052	6.93918	3.63713
ENSMUSG00000110575	6330537M06Rik	1642	RIKEN cDNA 6330537M06 gene [Source:MGI Symbol;Acc:MGI:1923413]	32.0521	0.00413014	0.0516052	0.00921286	0.329876
ENSMUSG00000073755	5730409E04Rik	2891	RIKEN cDNA 5730409E04Rik gene [Source:MGI Symbol;Acc:MGI:3609248]	-1.76709	0.00413418	0.0516198	5.4585	2.52583
ENSMUSG00000019970	Sgk1	4903	serum/glucocorticoid regulated kinase 1 [Source:MGI Symbol;Acc:MGI:1340062]	1.6814	0.00415193	0.0517894	29.3013	39.975
ENSMUSG00000022668	Gtpbp8	3527	GTP-binding protein 8 (putative) [Source:MGI Symbol;Acc:MGI:1913317]	-1.97688	0.00415352	0.0517894	3.55221	1.44479
ENSMUSG00000014030	Pax5	8853	paired box 5 [Source:MGI Symbol;Acc:MGI:97489]	123.06	0.00417716	0.0520238	0	0.0699399
ENSMUSG00000040055	Gjb6	2674	gap junction protein, beta 6 [Source:MGI Symbol;Acc:MGI:107588]	-152.123	0.00417811	0.0520238	0.353547	0
ENSMUSG00000020580	Rock2	13897	Rho-associated coiled-coil containing protein kinase 2 [Source:MGI Symbol;Acc:MGI:107926]	1.42665	0.00418325	0.0520458	14.5247	16.6805
ENSMUSG00000105556	Gm43080	2643	predicted gene 43080 [Source:MGI Symbol;Acc:MGI:5663217]	-4.80147	0.00418626	0.0520458	1.15709	0.195944
ENSMUSG00000032477	Cdc25a	8023	cell division cycle 25A [Source:MGI Symbol;Acc:MGI:103198]	-2.41215	0.00418856	0.0520458	0.898601	0.301455
ENSMUSG00000019838	Slc16a10	7356	solute carrier family 16 (monocarboxylic acid transporters), member 10 [Source:MGI Symbol;Acc:MGI:1919722]	3.5601	0.00419238	0.0520573	0.3229	0.935061
ENSMUSG00000027908	Tchhl1	2066	trichohyalin-like 1 [Source:MGI Symbol;Acc:MGI:1918575]	74.3564	0.00419593	0.0520655	0.0219777	1.53327
ENSMUSG00000028041	Adam15	6145	a disintegrin and metallopeptidase domain 15 (metargidin) [Source:MGI Symbol;Acc:MGI:1333882]	1.89402	0.00419952	0.052074	1.15175	1.76568
ENSMUSG00000037012	Hk1	8532	hexokinase 1 [Source:MGI Symbol;Acc:MGI:96103]	1.65132	0.00420943	0.0521609	12.3905	16.613
ENSMUSG00000059824	Dbp	2993	D site albumin promoter binding protein [Source:MGI Symbol;Acc:MGI:94866]	-1.7801	0.00421542	0.0521992	25.0663	11.3392
ENSMUSG00000004609	Cd33	7771	CD33 antigen [Source:MGI Symbol;Acc:MGI:99440]	5.44051	0.00422672	0.0523032	0.0392244	0.174875
ENSMUSG00000033728	Lrrc14	5647	leucine rich repeat containing 14 [Source:MGI Symbol;Acc:MGI:2445060]	-2.03821	0.00423411	0.0523585	1.39194	0.55727
ENSMUSG00000040928	S100pbp	9448	S100P binding protein [Source:MGI Symbol;Acc:MGI:1921898]	-1.65056	0.00426114	0.0526235	2.50452	1.21371
ENSMUSG00000047003	Zfp41	8595	zinc finger protein 41 [Source:MGI Symbol;Acc:MGI:99186]	-2.2543	0.00426139	0.0526235	0.866031	0.312778
ENSMUSG00000004768	Rab23	8285	RAB23, member RAS oncogene family [Source:MGI Symbol;Acc:MGI:99833]	-1.70909	0.00426852	0.0526753	2.09266	0.999835
ENSMUSG00000028568	Btf3l4	4546	basic transcription factor 3-like 4 [Source:MGI Symbol;Acc:MGI:1915312]	-1.57481	0.00429479	0.0529632	6.21481	3.20964
ENSMUSG00000070733	Fryl	15192	FRY like transcription coactivator [Source:MGI Symbol;Acc:MGI:1919563]	1.43785	0.00431355	0.0531581	12.6102	14.6036
ENSMUSG00000029726	Mepce	3553	methylphosphate capping enzyme [Source:MGI Symbol;Acc:MGI:106477]	-1.66086	0.00434808	0.053547	5.43557	2.62694
ENSMUSG00000028228	Cpne3	7131	copine III [Source:MGI Symbol;Acc:MGI:1917818]	-1.56064	0.00435318	0.053573	8.40145	4.37189
ENSMUSG00000091337	Eid1	1691	EP300 interacting inhibitor of differentiation 1 [Source:MGI Symbol;Acc:MGI:1889651]	-1.40956	0.00436246	0.0536112	68.9453	39.6975
ENSMUSG00000021670	Hmgcr	7275	3-hydroxy-3-methylglutaryl-Coenzyme A reductase [Source:MGI Symbol;Acc:MGI:96159]	1.67559	0.00436797	0.0536112	7.42619	9.84881
ENSMUSG00000021252	Erg28	4235	ergosterol biosynthesis 28 [Source:MGI Symbol;Acc:MGI:1915571]	-1.82582	0.00436952	0.0536112	2.62419	1.15321
ENSMUSG00000021948	Prkcd	5544	protein kinase C, delta [Source:MGI Symbol;Acc:MGI:97598]	1.57553	0.00437004	0.0536112	7.21959	9.13588
ENSMUSG00000006024	Napa	3786	N-ethylmaleimide sensitive fusion protein attachment protein alpha [Source:MGI Symbol;Acc:MGI:104563]	1.36143	0.00437119	0.0536112	19.2525	21.0438
ENSMUSG00000104583	Gm42701	1657	predicted gene 42701 [Source:MGI Symbol;Acc:MGI:5662838]	6.98948	0.00437967	0.0536785	0.419651	2.36686
ENSMUSG00000056947	Mab21l1	2492	mab-21-like 1 [Source:MGI Symbol;Acc:MGI:1333773]	-1.45183	0.00439253	0.0537995	35.6814	19.765
ENSMUSG00000021578	Ccdc127	9559	coiled-coil domain containing 127 [Source:MGI Symbol;Acc:MGI:1914683]	-1.47055	0.00440056	0.0538612	2.88324	1.58031
ENSMUSG00000007850	Hnrnph1	5842	heterogeneous nuclear ribonucleoprotein H1 [Source:MGI Symbol;Acc:MGI:1891925]	1.40501	0.00441444	0.0539943	32.5725	36.8
ENSMUSG00000078671	Chd2	14300	chromodomain helicase DNA binding protein 2 [Source:MGI Symbol;Acc:MGI:2448567]	1.41583	0.0044241	0.0540481	12.3197	13.9684
ENSMUSG00000017764	Zswim1	2781	zinc finger SWIM-type containing 1 [Source:MGI Symbol;Acc:MGI:1919221]	-2.82517	0.00442485	0.0540481	2.29914	0.668726
ENSMUSG00000028108	Ecm1	2521	extracellular matrix protein 1 [Source:MGI Symbol;Acc:MGI:103060]	3.24461	0.00443236	0.0541031	1.50971	3.84707
ENSMUSG00000033278	Ptprm	8828	protein tyrosine phosphatase, receptor type, M [Source:MGI Symbol;Acc:MGI:102694]	1.58104	0.0044456	0.054219	1.9356	2.45919
ENSMUSG00000047139	Cd24a	2580	CD24a antigen [Source:MGI Symbol;Acc:MGI:88323]	1.58444	0.00444788	0.054219	357.724	453.225
ENSMUSG00000040022	Rab11fip2	6080	RAB11 family interacting protein 2 (class I) [Source:MGI Symbol;Acc:MGI:1922248]	-1.62123	0.00446	0.0542588	4.63767	2.28497
ENSMUSG00000008035	Mid1ip1	2128	Mid1 interacting protein 1 (gastrulation specific G12-like (zebrafish)) [Source:MGI Symbol;Acc:MGI:1915291]	1.56174	0.00446133	0.0542588	14.4947	17.9748
ENSMUSG00000104093	A330015K06Rik	6190	RIKEN cDNA A330015K06 gene [Source:MGI Symbol;Acc:MGI:2443553]	4.92385	0.0044642	0.0542588	0.0821241	0.327144
ENSMUSG00000030509	Asb7	6488	ankyrin repeat and SOCS box-containing 7 [Source:MGI Symbol;Acc:MGI:2152835]	-1.58503	0.00446504	0.0542588	2.78846	1.42374
ENSMUSG00000017428	Psmd11	6383	proteasome (prosome, macropain) 26S subunit, non-ATPase, 11 [Source:MGI Symbol;Acc:MGI:1916327]	1.47123	0.00446624	0.0542588	7.97299	9.48866
ENSMUSG00000035725	Prkx	5807	protein kinase, X-linked [Source:MGI Symbol;Acc:MGI:1309999]	1.84461	0.00448069	0.0543976	2.13837	3.19963
ENSMUSG00000049550	Clip1	12388	CAP-GLY domain containing linker protein 1 [Source:MGI Symbol;Acc:MGI:1928401]	1.43877	0.00449109	0.0544474	4.15993	4.82399
ENSMUSG00000030671	Pde3b	9114	phosphodiesterase 3B, cGMP-inhibited [Source:MGI Symbol;Acc:MGI:1333863]	1.40056	0.00449492	0.0544474	3.06022	3.46915
ENSMUSG00000025272	Tro	7296	trophinin [Source:MGI Symbol;Acc:MGI:1928994]	1.76135	0.00449859	0.0544474	1.9323	2.76116
ENSMUSG00000015133	Lrrk1	10307	leucine-rich repeat kinase 1 [Source:MGI Symbol;Acc:MGI:2142227]	-1.75013	0.00450164	0.0544474	2.53859	1.17192
ENSMUSG00000021009	Ptpn21	7897	protein tyrosine phosphatase, non-receptor type 21 [Source:MGI Symbol;Acc:MGI:1344406]	1.45745	0.00450251	0.0544474	21.0367	24.6081
ENSMUSG00000019851	Perp	1952	PERP, TP53 apoptosis effector [Source:MGI Symbol;Acc:MGI:1929938]	1.69103	0.00450527	0.0544474	25.4573	34.6935
ENSMUSG00000032604	Qars	6572	glutaminyl-tRNA synthetase [Source:MGI Symbol;Acc:MGI:1915851]	1.45931	0.00450599	0.0544474	7.37608	8.61013
ENSMUSG00000015697	Setdb1	6853	SET domain, bifurcated 1 [Source:MGI Symbol;Acc:MGI:1934229]	-1.47494	0.00452255	0.0545577	4.84235	2.62918
ENSMUSG00000031732	Phlpp2	8449	PH domain and leucine rich repeat protein phosphatase 2 [Source:MGI Symbol;Acc:MGI:2444928]	1.49898	0.00452449	0.0545577	5.6325	6.74967
ENSMUSG00000047205	Dusp18	4632	dual specificity phosphatase 18 [Source:MGI Symbol;Acc:MGI:1922469]	3.33671	0.00452481	0.0545577	0.498605	1.33985
ENSMUSG00000057421	Las1l	8143	LAS1-like (S. cerevisiae) [Source:MGI Symbol;Acc:MGI:1923380]	1.60132	0.00452725	0.0545577	5.09707	6.52283
ENSMUSG00000112255	Gm47594	4154	predicted gene, 47594 [Source:MGI Symbol;Acc:MGI:6096642]	-95.0981	0.00453041	0.0545591	0.13721	0
ENSMUSG00000079215	Zfp664	7832	zinc finger protein 664 [Source:MGI Symbol;Acc:MGI:2442505]	-1.42123	0.00454914	0.0547481	10.8117	6.19159
ENSMUSG00000040464	Gtpbp10	6830	GTP-binding protein 10 (putative) [Source:MGI Symbol;Acc:MGI:2385599]	-2.26434	0.00457054	0.0549687	1.36042	0.490243
ENSMUSG00000030051	Aplf	5925	aprataxin and PNKP like factor [Source:MGI Symbol;Acc:MGI:1919353]	-2.16612	0.00457793	0.0550032	1.25214	0.473487
ENSMUSG00000033478	Fam160b1	5951	family with sequence similarity 160, member B1 [Source:MGI Symbol;Acc:MGI:2147545]	-1.50612	0.00457952	0.0550032	5.26023	2.83969
ENSMUSG00000074802	Gas2l3	7032	growth arrest-specific 2 like 3 [Source:MGI Symbol;Acc:MGI:1918780]	4.22007	0.00458824	0.0550122	1.76442	5.96531
ENSMUSG00000030921	Trim30a	4111	tripartite motif-containing 30A [Source:MGI Symbol;Acc:MGI:98178]	4.4236	0.00459172	0.0550122	0.221519	0.791057
ENSMUSG00000008575	Nfib	14957	nuclear factor I/B [Source:MGI Symbol;Acc:MGI:103188]	-1.40467	0.00459784	0.0550122	19.6856	11.2902
ENSMUSG00000058672	Tubb2a	1610	tubulin, beta 2A class IIA [Source:MGI Symbol;Acc:MGI:107861]	2.13464	0.00459815	0.0550122	16.6021	28.5607
ENSMUSG00000028532	Cachd1	6020	cache domain containing 1 [Source:MGI Symbol;Acc:MGI:2444177]	1.72674	0.00460179	0.0550122	4.07818	5.70444
ENSMUSG00000037029	Zfp146	3270	zinc finger protein 146 [Source:MGI Symbol;Acc:MGI:1347092]	-1.42848	0.00460678	0.0550122	10.9564	6.18973
ENSMUSG00000031617	Tmem184c	2723	transmembrane protein 184C [Source:MGI Symbol;Acc:MGI:2384562]	-1.41026	0.00460703	0.0550122	13.827	7.93722
ENSMUSG00000092624	Gm3654	1079	predicted gene 3654 [Source:MGI Symbol;Acc:MGI:3781830]	-4.35003	0.0046076	0.0550122	2.13026	0.389786
ENSMUSG00000116995	Gm21926	2478	predicted gene, 21926 [Source:MGI Symbol;Acc:MGI:5439378]	1.8211	0.00461103	0.0550122	3.71708	5.53946
ENSMUSG00000039218	Srrm2	12842	serine/arginine repetitive matrix 2 [Source:MGI Symbol;Acc:MGI:1923206]	1.42098	0.00461535	0.0550122	64.2043	72.9278
ENSMUSG00000046603	Tcaim	4620	T cell activation inhibitor, mitochondrial [Source:MGI Symbol;Acc:MGI:1196217]	-2.2829	0.00461659	0.0550122	1.61723	0.584584
ENSMUSG00000004462	Tbccd1	6939	TBCC domain containing 1 [Source:MGI Symbol;Acc:MGI:1917823]	-1.95486	0.00461698	0.0550122	1.56469	0.642918
ENSMUSG00000072915	Gm12258	4429	predicted gene 12258 [Source:MGI Symbol;Acc:MGI:3651534]	-2.48856	0.00463342	0.0551715	1.79393	0.578144
ENSMUSG00000115252	Gm48996	3617	predicted gene, 48996 [Source:MGI Symbol;Acc:MGI:6118344]	4.25909	0.00464684	0.0552947	0.286528	0.977681
ENSMUSG00000090722	Gm8378	3027	predicted gene 8378 [Source:MGI Symbol;Acc:MGI:3646777]	2.62435	0.00465973	0.0554114	1.97703	4.06785
ENSMUSG00000109307	Gm44700	846	predicted gene 44700 [Source:MGI Symbol;Acc:MGI:5753276]	124.91	0.00467155	0.0555065	0	0.717658
ENSMUSG00000024759	Atl3	10099	atlastin GTPase 3 [Source:MGI Symbol;Acc:MGI:1924270]	-1.59194	0.00467391	0.0555065	5.94166	3.01469
ENSMUSG00000026620	Mark1	4356	MAP/microtubule affinity regulating kinase 1 [Source:MGI Symbol;Acc:MGI:2664902]	2.51067	0.00467962	0.0555376	1.29107	2.59446
ENSMUSG00000041225	Arhgap12	8016	Rho GTPase activating protein 12 [Source:MGI Symbol;Acc:MGI:1922665]	-1.454	0.00468737	0.0555929	6.49511	3.60785
ENSMUSG00000024769	Cdc42bpg	6099	CDC42 binding protein kinase gamma (DMPK-like) [Source:MGI Symbol;Acc:MGI:2652845]	1.63103	0.0046926	0.0556183	2.90795	3.82759
ENSMUSG00000074634	Tmem267	5419	transmembrane protein 267 [Source:MGI Symbol;Acc:MGI:3648543]	2.58586	0.00469853	0.0556519	0.571463	1.20805
ENSMUSG00000041115	Iqsec2	6980	IQ motif and Sec7 domain 2 [Source:MGI Symbol;Acc:MGI:3528396]	1.47767	0.00470302	0.0556684	4.99272	5.92789
ENSMUSG00000043262	Uevld	7549	UEV and lactate/malate dehyrogenase domains [Source:MGI Symbol;Acc:MGI:1860490]	-1.81441	0.00470979	0.0557119	1.69906	0.76264
ENSMUSG00000040648	Ppip5k2	14381	diphosphoinositol pentakisphosphate kinase 2 [Source:MGI Symbol;Acc:MGI:2142810]	-1.61754	0.00471611	0.0557499	2.52925	1.25522
ENSMUSG00000067438	Hmx1	1588	H6 homeobox 1 [Source:MGI Symbol;Acc:MGI:107178]	-1.48212	0.00473176	0.0558711	40.2766	21.8044
ENSMUSG00000072720	Myo18b	10698	myosin XVIIIb [Source:MGI Symbol;Acc:MGI:1921626]	2.14717	0.00473258	0.0558711	0.701189	1.21288
ENSMUSG00000046982	Tshz1	5848	teashirt zinc finger family member 1 [Source:MGI Symbol;Acc:MGI:1346031]	1.37498	0.00473648	0.0558805	8.02872	8.93609
ENSMUSG00000030094	Xpc	5494	xeroderma pigmentosum, complementation group C [Source:MGI Symbol;Acc:MGI:103557]	-1.49397	0.004742	0.055909	7.62231	4.10746
ENSMUSG00000022595	Lypd2	679	Ly6/Plaur domain containing 2 [Source:MGI Symbol;Acc:MGI:1915561]	10.9934	0.00474975	0.0559636	0.359728	3.4245
ENSMUSG00000049106	Dcaf5	5942	DDB1 and CUL4 associated factor 5 [Source:MGI Symbol;Acc:MGI:2444785]	-1.34571	0.00476545	0.0561119	11.3233	6.77518
ENSMUSG00000022827	Rabl3	6369	RAB, member RAS oncogene family-like 3 [Source:MGI Symbol;Acc:MGI:1914907]	-1.99898	0.00477037	0.056133	1.50724	0.616302
ENSMUSG00000062031	Pgghg	3346	protein glucosylgalactosylhydroxylysine glucosidase [Source:MGI Symbol;Acc:MGI:2444047]	-1.72441	0.00477724	0.0561771	5.89727	2.80695
ENSMUSG00000040599	Mis12	3003	MIS12 kinetochore complex component [Source:MGI Symbol;Acc:MGI:1914389]	-2.32279	0.00478186	0.0561947	4.32907	1.54681
ENSMUSG00000042451	Mybph	2329	myosin binding protein H [Source:MGI Symbol;Acc:MGI:1858196]	4.22234	0.00480185	0.0563927	0.516238	1.83197
ENSMUSG00000020388	Pdlim4	2560	PDZ and LIM domain 4 [Source:MGI Symbol;Acc:MGI:1353470]	1.53935	0.00480609	0.0564057	7.8935	9.78512
ENSMUSG00000021250	Fos	2352	FBJ osteosarcoma oncogene [Source:MGI Symbol;Acc:MGI:95574]	13.1131	0.00481548	0.056479	47.8838	503.306
ENSMUSG00000036854	Hspb6	2299	heat shock protein, alpha-crystallin-related, B6 [Source:MGI Symbol;Acc:MGI:2685325]	2.57781	0.00482193	0.0565178	3.20975	6.75557
ENSMUSG00000036334	Igsf10	10150	immunoglobulin superfamily, member 10 [Source:MGI Symbol;Acc:MGI:1923481]	1.86639	0.00482911	0.0565651	2.99525	4.46456
ENSMUSG00000021922	Itih4	3690	inter alpha-trypsin inhibitor, heavy chain 4 [Source:MGI Symbol;Acc:MGI:109536]	9.61224	0.00483857	0.0566389	0.0450895	0.365794
ENSMUSG00000021661	Ankra2	4624	ankyrin repeat, family A (RFXANK-like), 2 [Source:MGI Symbol;Acc:MGI:1915808]	-1.77821	0.00484322	0.0566565	2.43352	1.10787
ENSMUSG00000025332	Kdm5c	7110	lysine (K)-specific demethylase 5C [Source:MGI Symbol;Acc:MGI:99781]	1.60344	0.00486035	0.05682	13.1216	16.8086
ENSMUSG00000018930	Ccl4	660	chemokine (C-C motif) ligand 4 [Source:MGI Symbol;Acc:MGI:98261]	30.774	0.0048716	0.0569145	0.022845	0.75127
ENSMUSG00000036534	Slc38a7	4144	solute carrier family 38, member 7 [Source:MGI Symbol;Acc:MGI:2679005]	-1.94399	0.004895	0.0571507	2.18602	0.902312
ENSMUSG00000109719	Gm45266	2173	predicted gene 45266 [Source:MGI Symbol;Acc:MGI:5791102]	3.65406	0.00492612	0.0574767	1.10641	3.14027
ENSMUSG00000024006	Stk38	11560	serine/threonine kinase 38 [Source:MGI Symbol;Acc:MGI:2442572]	-1.55203	0.00493069	0.0574928	5.0911	2.63623
ENSMUSG00000030555	Ttc23	8474	tetratricopeptide repeat domain 23 [Source:MGI Symbol;Acc:MGI:1914259]	-2.76122	0.00493931	0.0575559	2.35464	0.676728
ENSMUSG00000020280	Pus10	4325	pseudouridylate synthase 10 [Source:MGI Symbol;Acc:MGI:1921717]	-1.88626	0.00494457	0.0575799	2.23486	0.957281
ENSMUSG00000070565	Rasal2	13740	RAS protein activator like 2 [Source:MGI Symbol;Acc:MGI:2443881]	1.47467	0.00495003	0.0576062	4.34323	5.20245
ENSMUSG00000001521	Tulp3	9342	tubby-like protein 3 [Source:MGI Symbol;Acc:MGI:1329045]	-1.46524	0.00495491	0.0576256	6.19495	3.40923
ENSMUSG00000039630	Hnrnpu	11599	heterogeneous nuclear ribonucleoprotein U [Source:MGI Symbol;Acc:MGI:1858195]	1.41283	0.00496792	0.0577095	40.3119	45.7965
ENSMUSG00000070002	Ell	3108	elongation factor RNA polymerase II [Source:MGI Symbol;Acc:MGI:109377]	1.71866	0.00496854	0.0577095	7.35684	10.1112
ENSMUSG00000038250	Usp38	5736	ubiquitin specific peptidase 38 [Source:MGI Symbol;Acc:MGI:1922091]	1.47492	0.00497949	0.0577936	3.83743	4.56627
ENSMUSG00000028710	Atpaf1	4050	ATP synthase mitochondrial F1 complex assembly factor 1 [Source:MGI Symbol;Acc:MGI:2180560]	-2.28922	0.00498221	0.0577936	4.03435	1.40368
ENSMUSG00000065537	Mir132	66	microRNA 132 [Source:MGI Symbol;Acc:MGI:2676817]	180.218	0.00499399	0.0578929	0	13.6897
ENSMUSG00000038175	Mylip	3233	myosin regulatory light chain interacting protein [Source:MGI Symbol;Acc:MGI:2388271]	-1.64684	0.00500314	0.057944	10.1544	4.9625
ENSMUSG00000026878	Rab14	13589	RAB14, member RAS oncogene family [Source:MGI Symbol;Acc:MGI:1915615]	-1.32286	0.00500484	0.057944	7.26626	4.41851
ENSMUSG00000021514	Zfp369	7308	zinc finger protein 369 [Source:MGI Symbol;Acc:MGI:2176229]	-1.98713	0.00501118	0.05798	2.42185	0.987369
ENSMUSG00000038828	Tmem214	7580	transmembrane protein 214 [Source:MGI Symbol;Acc:MGI:1916046]	1.41124	0.00501943	0.0580382	4.19272	4.7493
ENSMUSG00000026577	Blzf1	5336	basic leucine zipper nuclear factor 1 [Source:MGI Symbol;Acc:MGI:1201607]	-1.46653	0.00502547	0.0580706	5.84536	3.2194
ENSMUSG00000033987	Dnah17	16126	dynein, axonemal, heavy chain 17 [Source:MGI Symbol;Acc:MGI:1917176]	12.5044	0.00504567	0.0582666	0.0131438	0.142499
ENSMUSG00000044730	9930104L06Rik	5592	RIKEN cDNA 9930104L06 gene [Source:MGI Symbol;Acc:MGI:3041172]	-2.15855	0.00505171	0.0582989	1.33147	0.509647
ENSMUSG00000027751	Supt20	6266	SPT20 SAGA complex component [Source:MGI Symbol;Acc:MGI:1929651]	-1.54673	0.0050553	0.0583029	7.23342	3.76171
ENSMUSG00000028277	Ube2j1	3530	ubiquitin-conjugating enzyme E2J 1 [Source:MGI Symbol;Acc:MGI:1926245]	1.61047	0.00507439	0.0584787	15.2185	19.832
ENSMUSG00000048537	Phldb1	7179	pleckstrin homology like domain, family B, member 1 [Source:MGI Symbol;Acc:MGI:2143230]	1.53173	0.0050782	0.0584787	25.4074	31.0359
ENSMUSG00000064351	mt-Co1	1545	mitochondrially encoded cytochrome c oxidase I [Source:MGI Symbol;Acc:MGI:102504]	1.92619	0.00508459	0.0584787	1325.42	2051.61
ENSMUSG00000024727	Trpm6	7719	transient receptor potential cation channel, subfamily M, member 6 [Source:MGI Symbol;Acc:MGI:2675603]	3.12993	0.00508515	0.0584787	0.0896509	0.230627
ENSMUSG00000037257	Aagab	5681	alpha- and gamma-adaptin binding protein [Source:MGI Symbol;Acc:MGI:1914189]	-1.45222	0.0050868	0.0584787	7.45453	4.17781
ENSMUSG00000022553	Maf1	2412	MAF1 homolog, negative regulator of RNA polymerase III [Source:MGI Symbol;Acc:MGI:1916127]	-1.75119	0.00509424	0.0585269	9.45818	4.44076
ENSMUSG00000036052	Dnajb5	5936	DnaJ heat shock protein family (Hsp40) member B5 [Source:MGI Symbol;Acc:MGI:1930018]	1.6796	0.00510471	0.0586096	3.2301	4.43323
ENSMUSG00000022120	Rnf219	4435	ring finger protein 219 [Source:MGI Symbol;Acc:MGI:1919736]	-2.59025	0.00512686	0.0588264	1.54732	0.47157
ENSMUSG00000054072	Iigp1	5823	interferon inducible GTPase 1 [Source:MGI Symbol;Acc:MGI:1926259]	20.3513	0.00513106	0.0588371	0.0599761	1.01251
ENSMUSG00000059278	Naa38	890	N(alpha)-acetyltransferase 38, NatC auxiliary subunit [Source:MGI Symbol;Acc:MGI:1925554]	-1.91691	0.005145	0.0589593	12.1827	5.15703
ENSMUSG00000018537	Pcgf2	3526	polycomb group ring finger 2 [Source:MGI Symbol;Acc:MGI:99161]	-1.74649	0.00515571	0.0590444	7.02939	3.22748
ENSMUSG00000063760	Rnf217	11013	ring finger protein 217 [Source:MGI Symbol;Acc:MGI:3610311]	1.6736	0.00517083	0.0591798	2.51004	3.34875
ENSMUSG00000072825	Cep170b	8002	centrosomal protein 170B [Source:MGI Symbol;Acc:MGI:2145043]	1.39045	0.00522844	0.0598011	12.2024	13.6141
ENSMUSG00000020521	Rnft1	4719	ring finger protein, transmembrane 1 [Source:MGI Symbol;Acc:MGI:1924142]	1.89243	0.00523361	0.0598222	1.8924	2.87491
ENSMUSG00000112964	E430024I08Rik	4631	RIKEN cDNA E430024I08 gene [Source:MGI Symbol;Acc:MGI:3649010]	-2.47229	0.00524652	0.0598919	1.77343	0.596014
ENSMUSG00000049755	Zfp672	6674	zinc finger protein 672 [Source:MGI Symbol;Acc:MGI:2442105]	-1.65709	0.00524904	0.0598919	2.41133	1.16915
ENSMUSG00000035202	Lars2	11089	leucyl-tRNA synthetase, mitochondrial [Source:MGI Symbol;Acc:MGI:2142973]	1.59874	0.0052497	0.0598919	16.8374	21.4425
ENSMUSG00000037262	Kin	1705	Kin17 DNA and RNA binding protein [Source:MGI Symbol;Acc:MGI:96676]	-1.90134	0.00525336	0.0598956	5.32524	2.24311
ENSMUSG00000116908	Gm49599	5095	predicted gene, 49599 [Source:MGI Symbol;Acc:MGI:6215007]	-2.13213	0.00527165	0.060066	2.35355	0.883744
ENSMUSG00000027510	Rbm38	2869	RNA binding motif protein 38 [Source:MGI Symbol;Acc:MGI:1889294]	1.95335	0.00527596	0.0600771	3.2319	5.02978
ENSMUSG00000029831	Npvf	812	neuropeptide VF precursor [Source:MGI Symbol;Acc:MGI:1926488]	2.26957	0.00528759	0.0601714	9.17089	16.7976
ENSMUSG00000011257	Pabpc4	4027	poly(A) binding protein, cytoplasmic 4 [Source:MGI Symbol;Acc:MGI:2385206]	1.64797	0.00529528	0.0602003	7.25992	9.65103
ENSMUSG00000032409	Atr	23629	ataxia telangiectasia and Rad3 related [Source:MGI Symbol;Acc:MGI:108028]	-1.58187	0.00529683	0.0602003	1.55924	0.792169
ENSMUSG00000071068	Treml2	4917	triggering receptor expressed on myeloid cells-like 2 [Source:MGI Symbol;Acc:MGI:2147038]	214.842	0.00530098	0.0602095	0	0.21401
ENSMUSG00000051790	Nlgn2	5785	neuroligin 2 [Source:MGI Symbol;Acc:MGI:2681835]	1.46904	0.00530779	0.0602488	10.8521	12.7444
ENSMUSG00000037020	Wdr62	5743	WD repeat domain 62 [Source:MGI Symbol;Acc:MGI:1923696]	-2.32509	0.0053314	0.0604785	1.16685	0.407528
ENSMUSG00000037408	Cnnm4	4829	cyclin M4 [Source:MGI Symbol;Acc:MGI:2151060]	1.74528	0.00534841	0.0606333	2.19344	3.08144
ENSMUSG00000020107	Anapc16	4890	anaphase promoting complex subunit 16 [Source:MGI Symbol;Acc:MGI:1289325]	-1.5199	0.00535294	0.0606464	6.14003	3.27022
ENSMUSG00000049723	Mmp12	7237	matrix metallopeptidase 12 [Source:MGI Symbol;Acc:MGI:97005]	8.29935	0.00535744	0.0606579	0.00834362	0.0604643
ENSMUSG00000012428	Steap4	3155	STEAP family member 4 [Source:MGI Symbol;Acc:MGI:1923560]	18.5751	0.0053608	0.0606579	0.694049	10.3999
ENSMUSG00000105302	Gm19817	2132	predicted gene, 19817 [Source:MGI Symbol;Acc:MGI:5012002]	6.85311	0.00536408	0.0606579	0.259527	1.42639
ENSMUSG00000046027	Stard5	5460	StAR-related lipid transfer (START) domain containing 5 [Source:MGI Symbol;Acc:MGI:2156765]	-2.02785	0.00537184	0.0607075	1.7295	0.68956
ENSMUSG00000074813	Morrbid	4070	myeloid RNA regulator of BCL2L11 induced cell death [Source:MGI Symbol;Acc:MGI:3652191]	3.52253	0.005381	0.0607729	0.224811	0.635387
ENSMUSG00000031546	Gins4	1349	GINS complex subunit 4 (Sld5 homolog) [Source:MGI Symbol;Acc:MGI:1923847]	-1.70888	0.00538964	0.0608322	7.50585	3.54439
ENSMUSG00000035246	Pcyt1b	5357	phosphate cytidylyltransferase 1, choline, beta isoform [Source:MGI Symbol;Acc:MGI:2147987]	-1.5887	0.00540343	0.0609396	8.12422	4.14632
ENSMUSG00000036291	Ap5m1	11392	adaptor-related protein complex 5, mu 1 subunit [Source:MGI Symbol;Acc:MGI:1921635]	-1.762	0.00540594	0.0609396	1.61992	0.743817
ENSMUSG00000055320	Tead1	13570	TEA domain family member 1 [Source:MGI Symbol;Acc:MGI:101876]	1.45946	0.00542129	0.0610647	8.31188	9.73742
ENSMUSG00000019373	Cops3	3454	COP9 signalosome subunit 3 [Source:MGI Symbol;Acc:MGI:1349409]	-1.48042	0.00542382	0.0610647	11.5678	6.3509
ENSMUSG00000022100	Xpo7	19005	exportin 7 [Source:MGI Symbol;Acc:MGI:1929705]	-1.35937	0.00542752	0.0610681	3.20534	1.90074
ENSMUSG00000018334	Ksr1	7103	kinase suppressor of ras 1 [Source:MGI Symbol;Acc:MGI:105051]	1.47583	0.00543774	0.0611448	5.1674	6.1777
ENSMUSG00000055305	Zfp93	3633	zinc finger protein 93 [Source:MGI Symbol;Acc:MGI:107611]	-3.07649	0.00545048	0.0612497	0.893118	0.23473
ENSMUSG00000102466	Gm38200	2111	predicted gene, 38200 [Source:MGI Symbol;Acc:MGI:5611428]	-6.26773	0.0054567	0.0612813	1.25105	0.159533
ENSMUSG00000050312	Nsun3	6084	NOL1/NOP2/Sun domain family member 3 [Source:MGI Symbol;Acc:MGI:2146565]	-2.01376	0.00547152	0.0614095	1.4373	0.58113
ENSMUSG00000033396	Spg11	8042	SPG11, spatacsin vesicle trafficking associated [Source:MGI Symbol;Acc:MGI:2444989]	-1.38383	0.00549765	0.0616568	6.40197	3.73122
ENSMUSG00000024384	Iws1	11083	IWS1, SUPT6 interacting protein [Source:MGI Symbol;Acc:MGI:1920723]	1.3831	0.00550042	0.0616568	6.08268	6.75556
ENSMUSG00000040945	Rcc2	4155	regulator of chromosome condensation 2 [Source:MGI Symbol;Acc:MGI:1919784]	-1.44973	0.00550518	0.0616717	10.1568	5.65401
ENSMUSG00000072964	Bhlhb9	4800	basic helix-loop-helix domain containing, class B9 [Source:MGI Symbol;Acc:MGI:1917487]	-1.39446	0.00551222	0.0616948	7.93218	4.59198
ENSMUSG00000034209	Rasl10a	1413	RAS-like, family 10, member A [Source:MGI Symbol;Acc:MGI:1922918]	10.9322	0.0055141	0.0616948	0.11635	0.986554
ENSMUSG00000028086	Fbxw7	7046	F-box and WD-40 domain protein 7 [Source:MGI Symbol;Acc:MGI:1354695]	1.48883	0.0055186	0.0617067	4.2082	4.99742
ENSMUSG00000016526	Dyrk3	3178	dual-specificity tyrosine-(Y)-phosphorylation regulated kinase 3 [Source:MGI Symbol;Acc:MGI:1330300]	2.78494	0.00552444	0.0617236	0.641857	1.47199
ENSMUSG00000000325	Arvcf	6715	armadillo repeat gene deleted in velocardiofacial syndrome [Source:MGI Symbol;Acc:MGI:109620]	-1.48624	0.00552891	0.0617236	60.4295	32.7437
ENSMUSG00000075302	Erich2	2948	glutamate rich 2 [Source:MGI Symbol;Acc:MGI:1913998]	2.41764	0.00553041	0.0617236	0.511103	1.00778
ENSMUSG00000020434	4921536K21Rik	2590	RIKEN cDNA 4921536K21 gene [Source:MGI Symbol;Acc:MGI:1914680]	16.4081	0.005538	0.06177	0.0290932	0.3947
ENSMUSG00000042359	Osbpl6	10063	oxysterol binding protein-like 6 [Source:MGI Symbol;Acc:MGI:2139014]	1.51817	0.00554759	0.0618386	2.15656	2.62524
ENSMUSG00000054459	Vsnl1	1956	visinin-like 1 [Source:MGI Symbol;Acc:MGI:1349453]	-1.81628	0.00555769	0.0619128	15.3843	7.00635
ENSMUSG00000033454	Zbtb1	12190	zinc finger and BTB domain containing 1 [Source:MGI Symbol;Acc:MGI:2442326]	-1.4971	0.00556748	0.0619835	4.47627	2.40492
ENSMUSG00000026836	Acvr1	4829	activin A receptor, type 1 [Source:MGI Symbol;Acc:MGI:87911]	1.54946	0.00557291	0.0620056	4.74619	5.88296
ENSMUSG00000106739	Gm43499	2107	predicted gene 43499 [Source:MGI Symbol;Acc:MGI:5663636]	5.99332	0.00557868	0.0620313	0.260831	1.23574
ENSMUSG00000035047	Kri1	4182	KRI1 homolog [Source:MGI Symbol;Acc:MGI:2384899]	1.46858	0.00559867	0.0621804	5.51003	6.50464
ENSMUSG00000038422	Hdhd3	1366	haloacid dehalogenase-like hydrolase domain containing 3 [Source:MGI Symbol;Acc:MGI:1919998]	-4.44261	0.005599	0.0621804	4.19305	0.79825
ENSMUSG00000022901	Cd86	3661	CD86 antigen [Source:MGI Symbol;Acc:MGI:101773]	16.6377	0.00560279	0.0621841	0.0249239	0.378509
ENSMUSG00000028354	Fmn2	7960	formin 2 [Source:MGI Symbol;Acc:MGI:1859252]	2.57054	0.00564481	0.0626118	0.748897	1.55746
ENSMUSG00000021978	Extl3	6063	exostoses (multiple)-like 3 [Source:MGI Symbol;Acc:MGI:1860765]	-1.3446	0.00565865	0.0627113	10.9414	6.55147
ENSMUSG00000051817	Sox12	4453	SRY (sex determining region Y)-box 12 [Source:MGI Symbol;Acc:MGI:98360]	-1.56245	0.00566076	0.0627113	11.0651	5.66419
ENSMUSG00000024276	Zfp397	8262	zinc finger protein 397 [Source:MGI Symbol;Acc:MGI:1916506]	-1.42771	0.00567752	0.0628582	3.92031	2.20689
ENSMUSG00000030201	Lrp6	13672	low density lipoprotein receptor-related protein 6 [Source:MGI Symbol;Acc:MGI:1298218]	1.39397	0.0056814	0.0628626	14.1087	15.9195
ENSMUSG00000021945	Zmym2	7860	zinc finger, MYM-type 2 [Source:MGI Symbol;Acc:MGI:1923257]	-1.45616	0.0057	0.0630296	8.69922	4.79793
ENSMUSG00000022394	L3mbtl2	5945	L3MBTL2 polycomb repressive complex 1 subunit [Source:MGI Symbol;Acc:MGI:2443584]	-1.77406	0.0057221	0.0632351	2.50337	1.12644
ENSMUSG00000004383	Large1	7976	LARGE xylosyl- and glucuronyltransferase 1 [Source:MGI Symbol;Acc:MGI:1342270]	1.56393	0.0057335	0.0633202	2.44938	3.04164
ENSMUSG00000023048	Prr13	1562	proline rich 13 [Source:MGI Symbol;Acc:MGI:1913401]	1.39216	0.00573685	0.0633202	21.1484	23.7548
ENSMUSG00000024413	Npc1	11317	NPC intracellular cholesterol transporter 1 [Source:MGI Symbol;Acc:MGI:1097712]	1.52388	0.00574418	0.0633622	3.93706	4.80139
ENSMUSG00000090112	Shprh	14066	SNF2 histone linker PHD RING helicase [Source:MGI Symbol;Acc:MGI:1917581]	-1.39798	0.0057497	0.0633772	4.13279	2.38112
ENSMUSG00000027822	Slc33a1	3548	solute carrier family 33 (acetyl-CoA transporter), member 1 [Source:MGI Symbol;Acc:MGI:1332247]	-1.58093	0.00575852	0.0633772	5.17625	2.62811
ENSMUSG00000020393	Kremen1	7722	kringle containing transmembrane protein 1 [Source:MGI Symbol;Acc:MGI:1933988]	1.38729	0.00575957	0.0633772	5.9678	6.63463
ENSMUSG00000045672	Col27a1	13022	collagen, type XXVII, alpha 1 [Source:MGI Symbol;Acc:MGI:2672118]	2.54961	0.00575964	0.0633772	2.1524	4.29582
ENSMUSG00000036975	Tmem177	3341	transmembrane protein 177 [Source:MGI Symbol;Acc:MGI:1913593]	-4.0743	0.00576574	0.0634055	1.18499	0.241578
ENSMUSG00000050463	Krt78	3437	keratin 78 [Source:MGI Symbol;Acc:MGI:1917529]	24.8583	0.00577074	0.0634217	0.00875841	0.219143
ENSMUSG00000085196	Gm14963	2558	predicted gene 14963 [Source:MGI Symbol;Acc:MGI:3705162]	5.42027	0.00578664	0.0635576	0.171007	0.753546
ENSMUSG00000027820	Mme	11542	membrane metallo endopeptidase [Source:MGI Symbol;Acc:MGI:97004]	-1.53384	0.00580774	0.0637504	30.5549	16.2371
ENSMUSG00000064427	Gm22748	136	predicted gene, 22748 [Source:MGI Symbol;Acc:MGI:5452525]	3.53639	0.00581973	0.063843	7.19961	20.3207
ENSMUSG00000091898	Tnnc1	1041	troponin C, cardiac/slow skeletal [Source:MGI Symbol;Acc:MGI:98779]	5.77008	0.00582825	0.0638975	0.543059	2.48958
ENSMUSG00000114431	Gm48601	3032	predicted gene, 48601 [Source:MGI Symbol;Acc:MGI:6098180]	5.75874	0.00585144	0.0640648	0.137825	0.627007
ENSMUSG00000026670	Uap1	4011	UDP-N-acetylglucosamine pyrophosphorylase 1 [Source:MGI Symbol;Acc:MGI:1334459]	1.66698	0.0058526	0.0640648	6.67506	9.07281
ENSMUSG00000004098	Col5a3	6809	collagen, type V, alpha 3 [Source:MGI Symbol;Acc:MGI:1858212]	2.23937	0.00585656	0.0640648	0.327884	0.587394
ENSMUSG00000052776	Oas1a	1885	2'-5' oligoadenylate synthetase 1A [Source:MGI Symbol;Acc:MGI:2180860]	8.34485	0.00585776	0.0640648	0.128723	0.935709
ENSMUSG00000033111	3830406C13Rik	4621	RIKEN cDNA 3830406C13 gene [Source:MGI Symbol;Acc:MGI:1917937]	-1.58484	0.00586248	0.0640775	3.79654	1.93473
ENSMUSG00000028807	Zbtb8a	2321	zinc finger and BTB domain containing 8a [Source:MGI Symbol;Acc:MGI:1920930]	-2.04792	0.00586748	0.0640931	5.46019	2.13518
ENSMUSG00000071655	Ubxn1	3047	UBX domain protein 1 [Source:MGI Symbol;Acc:MGI:1289301]	-1.33604	0.00587709	0.0641406	46.1998	27.9396
ENSMUSG00000035171	1110059E24Rik	3067	RIKEN cDNA 1110059E24 gene [Source:MGI Symbol;Acc:MGI:1913456]	-2.06343	0.00587896	0.0641406	3.04734	1.20974
ENSMUSG00000052316	Lrrc15	5310	leucine rich repeat containing 15 [Source:MGI Symbol;Acc:MGI:1921738]	8.35517	0.00590095	0.0643087	0.052023	0.374684
ENSMUSG00000058331	Zfp85	2359	zinc finger protein 85 [Source:MGI Symbol;Acc:MGI:107767]	-3.89271	0.00590152	0.0643087	1.53961	0.329332
ENSMUSG00000024258	Polr2d	1015	polymerase (RNA) II (DNA directed) polypeptide D [Source:MGI Symbol;Acc:MGI:1916491]	-2.10588	0.00590686	0.0643279	9.91331	3.82288
ENSMUSG00000029659	Medag	3956	mesenteric estrogen dependent adipogenesis [Source:MGI Symbol;Acc:MGI:1917967]	3.35387	0.00593237	0.0644906	1.1218	3.07793
ENSMUSG00000063281	Zfp35	3040	zinc finger protein 35 [Source:MGI Symbol;Acc:MGI:99179]	-1.6614	0.00593305	0.0644906	4.31222	2.0979
ENSMUSG00000031709	Tbc1d9	5887	TBC1 domain family, member 9 [Source:MGI Symbol;Acc:MGI:1918560]	1.83992	0.00593355	0.0644906	2.65789	3.95449
ENSMUSG00000021794	Glud1	4210	glutamate dehydrogenase 1 [Source:MGI Symbol;Acc:MGI:95753]	1.42248	0.00593614	0.0644906	20.0972	22.8536
ENSMUSG00000040640	Erc2	9728	ELKS/RAB6-interacting/CAST family member 2 [Source:MGI Symbol;Acc:MGI:1098749]	1.94334	0.00595003	0.0646023	1.44313	2.26702
ENSMUSG00000048776	Pthlh	1619	parathyroid hormone-like peptide [Source:MGI Symbol;Acc:MGI:97800]	25.8127	0.00596092	0.0646816	0.027843	0.628445
ENSMUSG00000048450	Msx1	3097	msh homeobox 1 [Source:MGI Symbol;Acc:MGI:97168]	-1.76819	0.00597949	0.0648122	10.7787	4.87888
ENSMUSG00000021033	Gstz1	5088	glutathione transferase zeta 1 (maleylacetoacetate isomerase) [Source:MGI Symbol;Acc:MGI:1341859]	-1.75399	0.00598253	0.0648122	4.60547	2.14008
ENSMUSG00000036940	Kdm1a	5179	lysine (K)-specific demethylase 1A [Source:MGI Symbol;Acc:MGI:1196256]	1.38501	0.00598377	0.0648122	12.5194	13.8865
ENSMUSG00000031969	Acad8	4143	acyl-Coenzyme A dehydrogenase family, member 8 [Source:MGI Symbol;Acc:MGI:1914198]	-1.67665	0.00599645	0.0649104	4.11717	1.98144
ENSMUSG00000001419	Mef2d	5985	myocyte enhancer factor 2D [Source:MGI Symbol;Acc:MGI:99533]	1.59851	0.00600219	0.0649334	12.0704	15.6046
ENSMUSG00000024640	Psat1	4254	phosphoserine aminotransferase 1 [Source:MGI Symbol;Acc:MGI:2183441]	-1.41814	0.0060437	0.0653432	15.9957	9.18771
ENSMUSG00000021835	Bmp4	2248	bone morphogenetic protein 4 [Source:MGI Symbol;Acc:MGI:88180]	1.94697	0.00604911	0.0653624	3.43584	5.36823
ENSMUSG00000031774	Fam192a	3769	family with sequence similarity 192, member A [Source:MGI Symbol;Acc:MGI:1919637]	-1.5514	0.00605744	0.065413	5.66445	2.97621
ENSMUSG00000029674	Limk1	7162	LIM-domain containing, protein kinase [Source:MGI Symbol;Acc:MGI:104572]	1.46598	0.00611223	0.0659362	2.36626	2.78547
ENSMUSG00000038855	Itpkb	10463	inositol 1,4,5-trisphosphate 3-kinase B [Source:MGI Symbol;Acc:MGI:109235]	3.2145	0.00611322	0.0659362	1.90996	4.99958
ENSMUSG00000026674	Ddr2	9264	discoidin domain receptor family, member 2 [Source:MGI Symbol;Acc:MGI:1345277]	1.40142	0.00612523	0.0660261	16.9847	19.0609
ENSMUSG00000036955	Kif1bp	4892	KIF1 binding protein [Source:MGI Symbol;Acc:MGI:1919570]	-1.42928	0.0061334	0.0660528	14.0817	8.01628
ENSMUSG00000034247	Plekhm1	5968	pleckstrin homology domain containing, family M (with RUN domain) member 1 [Source:MGI Symbol;Acc:MGI:2443207]	1.43277	0.00613505	0.0660528	7.18829	8.22931
ENSMUSG00000035273	Hpse	3516	heparanase [Source:MGI Symbol;Acc:MGI:1343124]	9.41699	0.00616671	0.066354	0.115261	0.882986
ENSMUSG00000064451	Snora23	184	small nucleolar RNA, H/ACA box 23 [Source:MGI Symbol;Acc:MGI:3819494]	7.51394	0.0061856	0.0665174	1.15585	7.22948
ENSMUSG00000027286	Lrrc57	2227	leucine rich repeat containing 57 [Source:MGI Symbol;Acc:MGI:1913856]	-2.03789	0.00619326	0.066523	3.83342	1.52548
ENSMUSG00000031207	Msn	6327	moesin [Source:MGI Symbol;Acc:MGI:97167]	1.9237	0.00619352	0.066523	9.10954	14.2589
ENSMUSG00000036894	Rap2b	6793	RAP2B, member of RAS oncogene family [Source:MGI Symbol;Acc:MGI:1921262]	1.82227	0.00621975	0.0667648	22.5352	32.8686
ENSMUSG00000031555	Adam9	4115	a disintegrin and metallopeptidase domain 9 (meltrin gamma) [Source:MGI Symbol;Acc:MGI:105376]	1.36264	0.00623717	0.0668433	26.9201	29.3875
ENSMUSG00000010392	Gosr1	4289	golgi SNAP receptor complex member 1 [Source:MGI Symbol;Acc:MGI:1858260]	-1.58323	0.00623989	0.0668433	5.67801	2.89635
ENSMUSG00000018733	Pex12	3536	peroxisomal biogenesis factor 12 [Source:MGI Symbol;Acc:MGI:2144177]	-3.05897	0.00624145	0.0668433	1.05095	0.269369
ENSMUSG00000028270	Gbp2	2516	guanylate binding protein 2 [Source:MGI Symbol;Acc:MGI:102772]	7.54312	0.00624193	0.0668433	6.71104	40.5975
ENSMUSG00000041605	Inava	4977	innate immunity activator [Source:MGI Symbol;Acc:MGI:1921579]	12.2399	0.00625414	0.0669342	0.0152583	0.17168
ENSMUSG00000087632	Gm6058	399	predicted gene 6058 [Source:MGI Symbol;Acc:MGI:3648617]	6.07844	0.00626247	0.0669637	1.05803	5.22463
ENSMUSG00000021108	Prkch	7530	protein kinase C, eta [Source:MGI Symbol;Acc:MGI:97600]	2.34175	0.00626434	0.0669637	0.571288	1.07945
ENSMUSG00000102762	4930403P22Rik	713	RIKEN cDNA 4930403P22 gene [Source:MGI Symbol;Acc:MGI:1921057]	14.403	0.00627086	0.0669935	0.17055	2.13707
ENSMUSG00000004891	Nes	6416	nestin [Source:MGI Symbol;Acc:MGI:101784]	2.77844	0.00628451	0.0670651	17.0164	38.7925
ENSMUSG00000037787	Apopt1	4016	apoptogenic, mitochondrial 1 [Source:MGI Symbol;Acc:MGI:1915270]	-1.5801	0.00628752	0.0670651	4.81131	2.47046
ENSMUSG00000002052	Supt6	7095	SPT6, histone chaperone and transcription elongation factor [Source:MGI Symbol;Acc:MGI:107726]	1.33865	0.0062919	0.0670651	29.164	31.4046
ENSMUSG00000020589	Fam49a	12596	family with sequence similarity 49, member A [Source:MGI Symbol;Acc:MGI:1261783]	1.54157	0.00629248	0.0670651	4.23285	5.24313
ENSMUSG00000047388	Atmin	4877	ATM interactor [Source:MGI Symbol;Acc:MGI:2682328]	-1.43478	0.00630559	0.0671406	7.12717	4.00785
ENSMUSG00000021822	Plau	2367	plasminogen activator, urokinase [Source:MGI Symbol;Acc:MGI:97611]	20.5131	0.00630846	0.0671406	0.831754	14.1774
ENSMUSG00000015647	Lama5	11388	laminin, alpha 5 [Source:MGI Symbol;Acc:MGI:105382]	1.5297	0.00631158	0.0671406	30.3155	36.956
ENSMUSG00000086517	Gm12534	469	predicted gene 12534 [Source:MGI Symbol;Acc:MGI:3650303]	47.8202	0.0063145	0.0671406	0.0321486	1.79594
ENSMUSG00000017677	Wsb1	3987	WD repeat and SOCS box-containing 1 [Source:MGI Symbol;Acc:MGI:1926139]	1.57557	0.00632621	0.0672248	17.89	22.3943
ENSMUSG00000002881	Nab1	4100	Ngfi-A binding protein 1 [Source:MGI Symbol;Acc:MGI:107564]	1.41477	0.0063299	0.0672248	10.3074	11.7487
ENSMUSG00000024867	Pip5k1b	4035	phosphatidylinositol-4-phosphate 5-kinase, type 1 beta [Source:MGI Symbol;Acc:MGI:107930]	1.76794	0.00633831	0.0672609	3.22654	4.63155
ENSMUSG00000032305	Fam219b	3087	family with sequence similarity 219, member B [Source:MGI Symbol;Acc:MGI:1925573]	-2.01412	0.00634078	0.0672609	3.0769	1.23639
ENSMUSG00000051343	Rab11fip5	6124	RAB11 family interacting protein 5 (class I) [Source:MGI Symbol;Acc:MGI:1098586]	1.57117	0.0063497	0.0673158	2.04143	2.58922
ENSMUSG00000028672	Hmgcl	2434	3-hydroxy-3-methylglutaryl-Coenzyme A lyase [Source:MGI Symbol;Acc:MGI:96158]	-1.63216	0.00635503	0.0673326	6.65239	3.33439
ENSMUSG00000030276	Ttll3	5041	tubulin tyrosine ligase-like family, member 3 [Source:MGI Symbol;Acc:MGI:2141418]	2.00248	0.00636757	0.0674186	0.879181	1.41473
ENSMUSG00000029372	Ppbp	1083	pro-platelet basic protein [Source:MGI Symbol;Acc:MGI:1888712]	33.7291	0.00637064	0.0674186	0.0982023	2.80493
ENSMUSG00000084052	Gm11745	448	predicted gene 11745 [Source:MGI Symbol;Acc:MGI:3649528]	-7.14249	0.00638632	0.0675447	4.46747	0.521783
ENSMUSG00000022018	Rgcc	918	regulator of cell cycle [Source:MGI Symbol;Acc:MGI:1913464]	7.71901	0.00639558	0.06755	0.544053	3.49228
ENSMUSG00000000394	Gcg	1494	glucagon [Source:MGI Symbol;Acc:MGI:95674]	15.8112	0.00639669	0.06755	0.549229	6.69743
ENSMUSG00000038058	Nod1	5079	nucleotide-binding oligomerization domain containing 1 [Source:MGI Symbol;Acc:MGI:1341839]	-1.7261	0.00639809	0.06755	3.27144	1.54594
ENSMUSG00000117628	Gm50012	1878	predicted gene, 50012 [Source:MGI Symbol;Acc:MGI:6275301]	1.90485	0.00641656	0.0677052	3.90607	5.96216
ENSMUSG00000029213	Commd8	4107	COMM domain containing 8 [Source:MGI Symbol;Acc:MGI:1343485]	-1.87845	0.00643657	0.0678766	3.8228	1.6703
ENSMUSG00000055421	Pcdh9	6783	protocadherin 9 [Source:MGI Symbol;Acc:MGI:1306801]	2.40915	0.00644466	0.0679198	2.09328	4.09704
ENSMUSG00000063808	Gpatch1	3791	G patch domain containing 1 [Source:MGI Symbol;Acc:MGI:1914721]	-1.75155	0.00644822	0.0679198	4.78231	2.18759
ENSMUSG00000047146	Tet1	15457	tet methylcytosine dioxygenase 1 [Source:MGI Symbol;Acc:MGI:1098693]	-1.53297	0.00645647	0.0679557	2.14111	1.13398
ENSMUSG00000003721	Insig2	3473	insulin induced gene 2 [Source:MGI Symbol;Acc:MGI:1920249]	-1.64953	0.00645919	0.0679557	5.95825	2.91778
ENSMUSG00000117528	Gm50017	631	predicted gene, 50017 [Source:MGI Symbol;Acc:MGI:6275310]	-120.707	0.00646818	0.0679741	1.16968	0
ENSMUSG00000023041	Krt6b	2235	keratin 6B [Source:MGI Symbol;Acc:MGI:1333768]	10.8132	0.00646851	0.0679741	0.322973	2.90527
ENSMUSG00000105801	C430019N01Rik	1567	RIKEN cDNA C430019N01 gene [Source:MGI Symbol;Acc:MGI:3028058]	6.0494	0.00647394	0.0679915	0.192218	0.916225
ENSMUSG00000022346	Myc	2717	myelocytomatosis oncogene [Source:MGI Symbol;Acc:MGI:97250]	4.57334	0.00648404	0.0680578	8.17297	30.0488
ENSMUSG00000036580	Spg20	7683	spastic paraplegia 20, spartin (Troyer syndrome) homolog (human) [Source:MGI Symbol;Acc:MGI:2139806]	-1.4143	0.00649477	0.0681307	15.7618	8.9922
ENSMUSG00000032092	Mpzl2	6968	myelin protein zero-like 2 [Source:MGI Symbol;Acc:MGI:1289160]	3.74954	0.00651736	0.0683278	0.745648	2.27958
ENSMUSG00000024556	Me2	7252	malic enzyme 2, NAD(+)-dependent, mitochondrial [Source:MGI Symbol;Acc:MGI:2147351]	-1.38393	0.00652166	0.068333	4.6483	2.71318
ENSMUSG00000034459	Ifit1	2656	interferon-induced protein with tetratricopeptide repeats 1 [Source:MGI Symbol;Acc:MGI:99450]	4.65331	0.00655046	0.0685948	1.78383	6.77845
ENSMUSG00000045349	Sh2d5	3740	SH2 domain containing 5 [Source:MGI Symbol;Acc:MGI:2446215]	4.22568	0.00656428	0.0686995	0.402608	1.3482
ENSMUSG00000074220	Zfp382	2298	zinc finger protein 382 [Source:MGI Symbol;Acc:MGI:3588204]	1.64571	0.00657258	0.0687464	4.34092	5.74015
ENSMUSG00000061981	Flot2	2740	flotillin 2 [Source:MGI Symbol;Acc:MGI:103309]	1.34934	0.00658011	0.0687851	38.9867	42.1321
ENSMUSG00000014301	Pam16	2435	presequence translocase-asssociated motor 16 homolog (S. cerevisiae) [Source:MGI Symbol;Acc:MGI:1913699]	-2.15309	0.00659057	0.0688544	2.62333	0.989327
ENSMUSG00000031519	Asb5	2262	ankyrin repeat and SOCs box-containing 5 [Source:MGI Symbol;Acc:MGI:1923544]	3.17651	0.00661232	0.0689774	1.0911	2.81067
ENSMUSG00000025981	Coq10b	4805	coenzyme Q10B [Source:MGI Symbol;Acc:MGI:1915126]	1.83116	0.00661286	0.0689774	2.64689	3.9093
ENSMUSG00000015957	Wnt11	4137	wingless-type MMTV integration site family, member 11 [Source:MGI Symbol;Acc:MGI:101948]	3.08765	0.00662065	0.0689774	0.795117	2.01132
ENSMUSG00000039456	Morc3	5430	microrchidia 3 [Source:MGI Symbol;Acc:MGI:2136841]	-1.56497	0.0066207	0.0689774	8.60622	4.41899
ENSMUSG00000020038	Cry1	3340	cryptochrome 1 (photolyase-like) [Source:MGI Symbol;Acc:MGI:1270841]	1.49085	0.00662152	0.0689774	7.24496	8.68964
ENSMUSG00000051615	Rap2a	4191	RAS related protein 2a [Source:MGI Symbol;Acc:MGI:97855]	1.75635	0.00664882	0.0692216	2.61693	3.74742
ENSMUSG00000107749	Gm44321	2855	predicted gene, 44321 [Source:MGI Symbol;Acc:MGI:5690713]	-5.6041	0.00667436	0.0694473	1.00701	0.141948
ENSMUSG00000020349	Ppp2ca	7490	protein phosphatase 2 (formerly 2A), catalytic subunit, alpha isoform [Source:MGI Symbol;Acc:MGI:1321159]	1.37851	0.00671789	0.0698598	22.0317	24.6092
ENSMUSG00000053390	Zfp952	4368	zinc finger protein 952 [Source:MGI Symbol;Acc:MGI:2441928]	-2.04297	0.00672305	0.0698697	1.6662	0.666482
ENSMUSG00000114501	Gm48582	6429	predicted gene, 48582 [Source:MGI Symbol;Acc:MGI:6098150]	-2.51957	0.0067295	0.0698697	1.66509	0.524783
ENSMUSG00000028106	Rprd2	11403	regulation of nuclear pre-mRNA domain containing 2 [Source:MGI Symbol;Acc:MGI:1922387]	-1.3227	0.0067305	0.0698697	6.4021	3.90286
ENSMUSG00000035397	Klf16	2674	Kruppel-like factor 16 [Source:MGI Symbol;Acc:MGI:2153049]	1.72773	0.0067396	0.0699238	6.24505	8.64065
ENSMUSG00000043252	Tmem64	4670	transmembrane protein 64 [Source:MGI Symbol;Acc:MGI:2140359]	-1.38221	0.00677061	0.0701778	10.4919	6.10402
ENSMUSG00000022811	Zfp148	10383	zinc finger protein 148 [Source:MGI Symbol;Acc:MGI:1332234]	-1.33144	0.00677189	0.0701778	9.34844	5.67645
ENSMUSG00000001247	Lsr	2172	lipolysis stimulated lipoprotein receptor [Source:MGI Symbol;Acc:MGI:1927471]	1.96601	0.00678043	0.0702001	2.80246	4.47972
ENSMUSG00000078870	Gm14410	2398	predicted gene 14410 [Source:MGI Symbol;Acc:MGI:3709158]	-2.33272	0.00678184	0.0702001	4.93247	1.71842
ENSMUSG00000006906	Stambp	10426	STAM binding protein [Source:MGI Symbol;Acc:MGI:1917777]	-1.7366	0.00678942	0.0702251	1.39892	0.655306
ENSMUSG00000040044	Orc3	6088	origin recognition complex, subunit 3 [Source:MGI Symbol;Acc:MGI:1354944]	-1.52766	0.00679207	0.0702251	3.85231	2.03474
ENSMUSG00000055978	Fut2	5431	fucosyltransferase 2 [Source:MGI Symbol;Acc:MGI:109374]	52.2808	0.00681312	0.0704023	0.00277622	0.162736
ENSMUSG00000028341	Nr4a3	5987	nuclear receptor subfamily 4, group A, member 3 [Source:MGI Symbol;Acc:MGI:1352457]	5.9599	0.0068224	0.0704576	2.38946	11.3058
ENSMUSG00000104903	Gm43707	3187	predicted gene 43707 [Source:MGI Symbol;Acc:MGI:5663844]	2.85455	0.00687234	0.0709326	0.762488	1.70802
ENSMUSG00000050558	Prokr2	7919	prokineticin receptor 2 [Source:MGI Symbol;Acc:MGI:2181363]	3.73849	0.00687713	0.0709414	0.14667	0.432342
ENSMUSG00000020621	Rdh14	1480	retinol dehydrogenase 14 (all-trans and 9-cis) [Source:MGI Symbol;Acc:MGI:1920402]	-1.64706	0.00688747	0.0709486	9.11995	4.48338
ENSMUSG00000025261	Huwe1	23507	HECT, UBA and WWE domain containing 1 [Source:MGI Symbol;Acc:MGI:1926884]	1.36141	0.00689087	0.0709486	22.6806	24.7675
ENSMUSG00000023169	Slc38a1	17236	solute carrier family 38, member 1 [Source:MGI Symbol;Acc:MGI:2145895]	1.52012	0.00689309	0.0709486	4.45343	5.37981
ENSMUSG00000104713	Gbp6	5954	guanylate binding protein 6 [Source:MGI Symbol;Acc:MGI:2140937]	3.90161	0.00689362	0.0709486	0.173913	0.55864
ENSMUSG00000073394	Runx2os1	792	runt related transcription factor 2, opposite strand 1 [Source:MGI Symbol;Acc:MGI:3641707]	11.9527	0.00689925	0.070966	0.0573751	0.636818
ENSMUSG00000038037	Socs1	2908	suppressor of cytokine signaling 1 [Source:MGI Symbol;Acc:MGI:1354910]	5.97117	0.00691064	0.0710425	0.972355	4.80614
ENSMUSG00000021596	Mctp1	8193	multiple C2 domains, transmembrane 1 [Source:MGI Symbol;Acc:MGI:1926021]	57.1121	0.00692976	0.0711983	0.00367419	0.193369
ENSMUSG00000056687	Gm11696	4250	predicted gene 11696 [Source:MGI Symbol;Acc:MGI:3701776]	2.40151	0.00694666	0.0712979	0.827972	1.57707
ENSMUSG00000029456	Acad10	6068	acyl-Coenzyme A dehydrogenase family, member 10 [Source:MGI Symbol;Acc:MGI:1919235]	2.25531	0.00694738	0.0712979	0.350825	0.631178
ENSMUSG00000029019	Nppb	781	natriuretic peptide type B [Source:MGI Symbol;Acc:MGI:97368]	5.72935	0.00696145	0.0714015	0.193987	0.914188
ENSMUSG00000033508	Asprv1	1547	aspartic peptidase, retroviral-like 1 [Source:MGI Symbol;Acc:MGI:1915105]	3.45796	0.00697072	0.0714558	1.54247	4.36647
ENSMUSG00000059089	Fcgr4	1256	Fc receptor, IgG, low affinity IV [Source:MGI Symbol;Acc:MGI:2179523]	-59.8013	0.00697662	0.0714756	0.295648	0
ENSMUSG00000079357	Gm11100	3866	predicted gene 11100 [Source:MGI Symbol;Acc:MGI:3779338]	-101.434	0.00698578	0.0715287	0.159901	0
ENSMUSG00000002565	Scin	2999	scinderin [Source:MGI Symbol;Acc:MGI:1306794]	4.56248	0.0070224	0.0718627	0.125793	0.480312
ENSMUSG00000085735	Mettl5os	667	methyltransferase like 5, opposite strand [Source:MGI Symbol;Acc:MGI:1922537]	10.5104	0.00704147	0.0720168	0.112886	0.970535
ENSMUSG00000025077	Dclre1a	6384	DNA cross-link repair 1A [Source:MGI Symbol;Acc:MGI:1930042]	-1.64336	0.00704984	0.0720615	1.64978	0.812115
ENSMUSG00000029007	Agtrap	4236	angiotensin II, type I receptor-associated protein [Source:MGI Symbol;Acc:MGI:1339977]	-1.58236	0.00705863	0.0721103	6.76175	3.48744
ENSMUSG00000048106	4632415L05Rik	6148	RIKEN cDNA 4632415L05 gene [Source:MGI Symbol;Acc:MGI:1918058]	-1.73244	0.00708896	0.0723099	2.7323	1.27831
ENSMUSG00000022914	Brwd1	20280	bromodomain and WD repeat domain containing 1 [Source:MGI Symbol;Acc:MGI:1890651]	1.46871	0.00708946	0.0723099	5.27863	6.16901
ENSMUSG00000038550	Ciart	2261	circadian associated repressor of transcription [Source:MGI Symbol;Acc:MGI:2684975]	-5.43876	0.00709024	0.0723099	10.4039	1.49239
ENSMUSG00000027427	Polr3f	7710	polymerase (RNA) III (DNA directed) polypeptide F [Source:MGI Symbol;Acc:MGI:1924086]	-1.57368	0.0071043	0.0724123	2.96514	1.53379
ENSMUSG00000017999	Ddx27	4817	DEAD (Asp-Glu-Ala-Asp) box polypeptide 27 [Source:MGI Symbol;Acc:MGI:2385884]	1.43262	0.00711482	0.0724784	10.5636	12.1697
ENSMUSG00000036002	Fam214b	4129	family with sequence similarity 214, member B [Source:MGI Symbol;Acc:MGI:2441854]	1.4571	0.00711884	0.0724784	5.64838	6.63548
ENSMUSG00000017390	Aldoc	3263	aldolase C, fructose-bisphosphate [Source:MGI Symbol;Acc:MGI:101863]	-1.61479	0.00712604	0.0724843	295.994	150.264
ENSMUSG00000056069	Otulinl	3241	OTU deubiquitinase with linear linkage specificity like [Source:MGI Symbol;Acc:MGI:2687281]	-2.04871	0.00712918	0.0724843	5.86607	2.31052
ENSMUSG00000032735	Ablim3	4535	actin binding LIM protein family, member 3 [Source:MGI Symbol;Acc:MGI:2442582]	3.84972	0.00713152	0.0724843	0.40761	1.27139
ENSMUSG00000114554	5430425K12Rik	1526	RIKEN cDNA 5430425K12 gene [Source:MGI Symbol;Acc:MGI:1918666]	82.447	0.00714556	0.0725226	0	0.264769
ENSMUSG00000058070	Eml1	7436	echinoderm microtubule associated protein like 1 [Source:MGI Symbol;Acc:MGI:1915769]	1.90205	0.00714758	0.0725226	1.55662	2.39753
ENSMUSG00000020640	Itsn2	13579	intersectin 2 [Source:MGI Symbol;Acc:MGI:1338049]	1.3625	0.00714772	0.0725226	5.33211	5.81439
ENSMUSG00000038608	Dock10	18267	dedicator of cytokinesis 10 [Source:MGI Symbol;Acc:MGI:2146320]	3.71583	0.00715142	0.0725226	0.0538165	0.156367
ENSMUSG00000020689	Itgb3	5901	integrin beta 3 [Source:MGI Symbol;Acc:MGI:96612]	8.13194	0.0072002	0.0729761	0.072111	0.477597
ENSMUSG00000059401	Mamld1	4812	mastermind-like domain containing 1 [Source:MGI Symbol;Acc:MGI:3045303]	1.83299	0.00722287	0.0731298	2.02502	3.03185
ENSMUSG00000020484	Xbp1	3248	X-box binding protein 1 [Source:MGI Symbol;Acc:MGI:98970]	1.55182	0.0072235	0.0731298	10.7323	13.4088
ENSMUSG00000028794	A3galt2	3588	alpha 1,3-galactosyltransferase 2 (isoglobotriaosylceramide synthase) [Source:MGI Symbol;Acc:MGI:2685279]	2.76845	0.00723198	0.0731744	0.612092	1.37435
ENSMUSG00000050714	Zbtb26	9489	zinc finger and BTB domain containing 26 [Source:MGI Symbol;Acc:MGI:2444402]	-2.45424	0.00723767	0.0731869	1.16092	0.39012
ENSMUSG00000034686	Prr7	1359	proline rich 7 (synaptic) [Source:MGI Symbol;Acc:MGI:3487246]	2.72731	0.00724135	0.0731869	3.17382	7.09431
ENSMUSG00000035329	Fbxo33	4466	F-box protein 33 [Source:MGI Symbol;Acc:MGI:1917861]	1.68181	0.00725253	0.0732587	4.18829	5.73815
ENSMUSG00000038324	Trpc4ap	8753	transient receptor potential cation channel, subfamily C, member 4 associated protein [Source:MGI Symbol;Acc:MGI:1930751]	-1.31794	0.00726111	0.0733042	7.71965	4.74364
ENSMUSG00000059482	2610301B20Rik	2391	RIKEN cDNA 2610301B20 gene [Source:MGI Symbol;Acc:MGI:1914407]	-2.13626	0.00728272	0.0734811	3.50854	1.35562
ENSMUSG00000040250	Ints13	8485	integrator complex subunit 13 [Source:MGI Symbol;Acc:MGI:1918427]	1.44042	0.00729459	0.0735245	3.03062	3.50416
ENSMUSG00000025498	Irf7	3776	interferon regulatory factor 7 [Source:MGI Symbol;Acc:MGI:1859212]	2.81188	0.00729668	0.0735245	0.605432	1.38588
ENSMUSG00000074743	Thbd	3723	thrombomodulin [Source:MGI Symbol;Acc:MGI:98736]	5.57398	0.00730017	0.0735245	2.79927	12.6724
ENSMUSG00000029434	Vps33a	4790	VPS33A CORVET/HOPS core subunit [Source:MGI Symbol;Acc:MGI:1924823]	-1.63825	0.00730338	0.0735245	7.78971	3.85349
ENSMUSG00000060336	Zfp937	2797	zinc finger protein 937 [Source:MGI Symbol;Acc:MGI:3644476]	-2.33798	0.00733129	0.0737642	2.17838	0.765522
ENSMUSG00000115546	Gm49077	1266	predicted gene, 49077 [Source:MGI Symbol;Acc:MGI:6118462]	7.83562	0.00733911	0.0738015	0.224053	1.44211
ENSMUSG00000055723	Rras2	3554	related RAS viral (r-ras) oncogene 2 [Source:MGI Symbol;Acc:MGI:1914172]	1.65213	0.00735101	0.0738799	10.7031	14.299
ENSMUSG00000026111	Unc50	1579	unc-50 homolog [Source:MGI Symbol;Acc:MGI:1914637]	-1.73	0.00737385	0.0740681	9.06445	4.26764
ENSMUSG00000031586	Rbpms	6556	RNA binding protein gene with multiple splicing [Source:MGI Symbol;Acc:MGI:1334446]	2.15285	0.00737823	0.0740707	1.50657	2.6173
ENSMUSG00000031683	Lsm6	4076	LSM6 homolog, U6 small nuclear RNA and mRNA degradation associated [Source:MGI Symbol;Acc:MGI:1925901]	-1.54127	0.00739695	0.0741678	5.04766	2.66887
ENSMUSG00000038780	Smurf1	6336	SMAD specific E3 ubiquitin protein ligase 1 [Source:MGI Symbol;Acc:MGI:1923038]	1.45532	0.00739756	0.0741678	5.17956	6.0447
ENSMUSG00000016510	Mtif3	5127	mitochondrial translational initiation factor 3 [Source:MGI Symbol;Acc:MGI:1923616]	-1.99901	0.00740028	0.0741678	2.31836	0.945151
ENSMUSG00000035441	Myo1d	6465	myosin ID [Source:MGI Symbol;Acc:MGI:107728]	1.48804	0.00740664	0.0741902	6.13613	7.37909
ENSMUSG00000078920	Ifi47	2473	interferon gamma inducible protein 47 [Source:MGI Symbol;Acc:MGI:99448]	22.3967	0.00741572	0.0742314	0.0955113	1.67699
ENSMUSG00000044350	Lacc1	3644	laccase domain containing 1 [Source:MGI Symbol;Acc:MGI:2445077]	-1.63455	0.00741901	0.0742314	21.5596	10.5217
ENSMUSG00000039910	Cited2	2457	Cbp/p300-interacting transactivator, with Glu/Asp-rich carboxy-terminal domain, 2 [Source:MGI Symbol;Acc:MGI:1306784]	1.50565	0.00742469	0.0742469	27.254	33.2062
ENSMUSG00000026708	Cenpl	5695	centromere protein L [Source:MGI Symbol;Acc:MGI:1917704]	5.91895	0.0074449	0.0744076	0.26496	1.25155
ENSMUSG00000026880	Stom	2827	stomatin [Source:MGI Symbol;Acc:MGI:95403]	1.93475	0.00745186	0.0744275	7.64098	11.949
ENSMUSG00000061665	Cd2ap	15864	CD2-associated protein [Source:MGI Symbol;Acc:MGI:1330281]	-1.3479	0.00745516	0.0744275	7.50281	4.48322
ENSMUSG00000031824	6430548M08Rik	6626	RIKEN cDNA 6430548M08 gene [Source:MGI Symbol;Acc:MGI:2443793]	1.5697	0.00747421	0.0745675	7.35178	9.4101
ENSMUSG00000020133	2310011J03Rik	1649	RIKEN cDNA 2310011J03 gene [Source:MGI Symbol;Acc:MGI:1913624]	-1.75044	0.00748114	0.0745675	5.60329	2.59755
ENSMUSG00000033855	Ston1	4521	stonin 1 [Source:MGI Symbol;Acc:MGI:1924307]	-1.57954	0.00748164	0.0745675	4.50767	2.32338
ENSMUSG00000049515	Espnl	5445	espin-like [Source:MGI Symbol;Acc:MGI:2685402]	6.15336	0.00748753	0.0745849	0.0607662	0.304406
ENSMUSG00000020108	Ddit4	1755	DNA-damage-inducible transcript 4 [Source:MGI Symbol;Acc:MGI:1921997]	-2.92599	0.00750347	0.0747023	20.7946	5.72338
ENSMUSG00000021917	Spcs1	1546	signal peptidase complex subunit 1 homolog (S. cerevisiae) [Source:MGI Symbol;Acc:MGI:1916269]	-1.57007	0.00751887	0.0748143	12.6871	6.55107
ENSMUSG00000024077	Strn	8858	striatin, calmodulin binding protein [Source:MGI Symbol;Acc:MGI:1333757]	-1.33954	0.00754141	0.074997	10.4402	6.3105
ENSMUSG00000029208	Guf1	10372	GUF1 homolog, GTPase [Source:MGI Symbol;Acc:MGI:2140726]	-1.70159	0.00757131	0.0752527	2.68882	1.25961
ENSMUSG00000023206	Il15ra	4446	interleukin 15 receptor, alpha chain [Source:MGI Symbol;Acc:MGI:104644]	4.24737	0.00759247	0.0753962	1.21028	4.16395
ENSMUSG00000054792	Klhl18	7021	kelch-like 18 [Source:MGI Symbol;Acc:MGI:2143315]	1.79217	0.00759414	0.0753962	3.25672	4.72526
ENSMUSG00000036591	Arhgap21	9271	Rho GTPase activating protein 21 [Source:MGI Symbol;Acc:MGI:1918685]	1.3746	0.00761488	0.0755604	10.9138	11.9828
ENSMUSG00000036106	Prr5	1917	proline rich 5 (renal) [Source:MGI Symbol;Acc:MGI:1924714]	-3.52996	0.00762624	0.0756314	1.74198	0.407228
ENSMUSG00000007888	Crlf1	1644	cytokine receptor-like factor 1 [Source:MGI Symbol;Acc:MGI:1340030]	8.90804	0.00763265	0.0756533	0.149559	1.08546
ENSMUSG00000041777	Cir1	3159	corepressor interacting with RBPJ, 1 [Source:MGI Symbol;Acc:MGI:1914185]	-1.52448	0.0076433	0.0757171	8.38674	4.42028
ENSMUSG00000097266	Gm26802	2144	predicted gene, 26802 [Source:MGI Symbol;Acc:MGI:5477296]	143.826	0.00768111	0.0760366	0	0.329728
ENSMUSG00000052446	Zfp961	4334	zinc finger protein 961 [Source:MGI Symbol;Acc:MGI:3583954]	-2.42326	0.00768401	0.0760366	1.49552	0.498145
ENSMUSG00000021589	Rhobtb3	5781	Rho-related BTB domain containing 3 [Source:MGI Symbol;Acc:MGI:1920546]	-1.81515	0.00768849	0.076039	2.8691	1.29825
ENSMUSG00000030595	Nfkbib	2169	nuclear factor of kappa light polypeptide gene enhancer in B cells inhibitor, beta [Source:MGI Symbol;Acc:MGI:104752]	1.74789	0.00769486	0.0760602	6.22781	8.8371
ENSMUSG00000053347	Zfp943	4786	zinc finger prtoein 943 [Source:MGI Symbol;Acc:MGI:1921920]	-1.91859	0.00770979	0.0761659	2.95295	1.25395
ENSMUSG00000037697	Ddhd1	14076	DDHD domain containing 1 [Source:MGI Symbol;Acc:MGI:2150302]	1.54207	0.00772743	0.0762983	2.67717	3.33231
ENSMUSG00000058748	Zfp958	2364	zinc finger protein 958 [Source:MGI Symbol;Acc:MGI:2385298]	-2.67528	0.00774163	0.0763671	2.76486	0.833672
ENSMUSG00000029911	Ssbp1	8360	single-stranded DNA binding protein 1 [Source:MGI Symbol;Acc:MGI:1920040]	-1.52501	0.00774289	0.0763671	2.18629	1.15476
ENSMUSG00000022464	Slc38a4	4261	solute carrier family 38, member 4 [Source:MGI Symbol;Acc:MGI:1916604]	-1.60303	0.00776353	0.076467	13.6835	6.89355
ENSMUSG00000033933	Vhl	2997	von Hippel-Lindau tumor suppressor [Source:MGI Symbol;Acc:MGI:103223]	-1.51782	0.00776361	0.076467	7.89509	4.2058
ENSMUSG00000051166	Eml5	12031	echinoderm microtubule associated protein like 5 [Source:MGI Symbol;Acc:MGI:2442513]	1.43052	0.00776578	0.076467	6.15778	7.10949
ENSMUSG00000068115	Ninl	5952	ninein-like [Source:MGI Symbol;Acc:MGI:1925427]	1.77431	0.0078096	0.0768295	4.17292	5.91434
ENSMUSG00000061898	Rbak	4143	RB-associated KRAB zinc finger [Source:MGI Symbol;Acc:MGI:1927369]	-2.12542	0.00781114	0.0768295	3.25707	1.21632
ENSMUSG00000026034	Clk1	8132	CDC-like kinase 1 [Source:MGI Symbol;Acc:MGI:107403]	1.52195	0.00782772	0.0769504	10.7962	13.0797
ENSMUSG00000027087	Itgav	10744	integrin alpha V [Source:MGI Symbol;Acc:MGI:96608]	1.41691	0.00784225	0.0770512	27.5542	31.5664
ENSMUSG00000050121	Opalin	2946	oligodendrocytic myelin paranodal and inner loop protein [Source:MGI Symbol;Acc:MGI:2657025]	63.1258	0.00786598	0.0772082	0	0.107701
ENSMUSG00000090222	Ifi203-ps	2556	interferon activated gene 203, pseudogene [Source:MGI Symbol;Acc:MGI:3840117]	37.3473	0.00786682	0.0772082	0.0118539	0.406133
ENSMUSG00000035373	Ccl7	801	chemokine (C-C motif) ligand 7 [Source:MGI Symbol;Acc:MGI:99512]	3.33603	0.00787555	0.07722	15.5595	41.9753
ENSMUSG00000031939	Taf1d	8949	TATA-box binding protein associated factor, RNA polymerase I, D [Source:MGI Symbol;Acc:MGI:1922566]	1.61097	0.00787661	0.07722	4.39566	5.66472
ENSMUSG00000033628	Pik3c3	4466	phosphatidylinositol 3-kinase catalytic subunit type 3 [Source:MGI Symbol;Acc:MGI:2445019]	-1.64547	0.00792015	0.0776045	5.60044	2.78342
ENSMUSG00000022500	Litaf	5156	LPS-induced TN factor [Source:MGI Symbol;Acc:MGI:1929512]	1.73092	0.00792929	0.0776352	4.33098	6.06869
ENSMUSG00000028957	Per3	9608	period circadian clock 3 [Source:MGI Symbol;Acc:MGI:1277134]	-1.82279	0.00793192	0.0776352	9.64446	4.22948
ENSMUSG00000015027	Galns	2650	galactosamine (N-acetyl)-6-sulfate sulfatase [Source:MGI Symbol;Acc:MGI:1355303]	-1.59655	0.00795976	0.0778653	11.8269	5.96031
ENSMUSG00000108542	Gm44834	1396	predicted gene 44834 [Source:MGI Symbol;Acc:MGI:5753410]	2.31713	0.00797256	0.0779094	3.04607	5.63897
ENSMUSG00000043467	Zbtb37	18814	zinc finger and BTB domain containing 37 [Source:MGI Symbol;Acc:MGI:2444467]	-1.42555	0.00797293	0.0779094	2.26156	1.28668
ENSMUSG00000030881	Arfip2	4902	ADP-ribosylation factor interacting protein 2 [Source:MGI Symbol;Acc:MGI:1924182]	-1.42082	0.00799279	0.078061	6.87025	3.89841
ENSMUSG00000039202	Abhd2	10573	abhydrolase domain containing 2 [Source:MGI Symbol;Acc:MGI:1914344]	1.51082	0.00800466	0.0780937	7.90439	9.70639
ENSMUSG00000034520	Gjc1	5003	gap junction protein, gamma 1 [Source:MGI Symbol;Acc:MGI:95718]	2.39435	0.00800873	0.0780937	1.09857	2.10437
ENSMUSG00000095567	Noc2l	4160	NOC2 like nucleolar associated transcriptional repressor [Source:MGI Symbol;Acc:MGI:1931051]	1.45777	0.00801292	0.0780937	11.3181	13.2016
ENSMUSG00000039046	Usp6nl	8059	USP6 N-terminal like [Source:MGI Symbol;Acc:MGI:2138893]	1.35818	0.0080135	0.0780937	6.58796	7.21607
ENSMUSG00000108081	Gm44026	2088	predicted gene, 44026 [Source:MGI Symbol;Acc:MGI:5690418]	-11.5561	0.00804409	0.0783492	0.789093	0.056025
ENSMUSG00000032475	Nck1	4792	non-catalytic region of tyrosine kinase adaptor protein 1 [Source:MGI Symbol;Acc:MGI:109601]	-1.62435	0.00806445	0.0784716	4.44609	2.18519
ENSMUSG00000006276	Eps15l1	6739	epidermal growth factor receptor pathway substrate 15-like 1 [Source:MGI Symbol;Acc:MGI:104582]	1.49614	0.00806537	0.0784716	9.25009	11.0082
ENSMUSG00000040212	Emp3	1071	epithelial membrane protein 3 [Source:MGI Symbol;Acc:MGI:1098729]	2.62637	0.00807166	0.0784902	3.04482	6.49035
ENSMUSG00000029250	Polr2b	4667	polymerase (RNA) II (DNA directed) polypeptide B [Source:MGI Symbol;Acc:MGI:2388280]	-1.34862	0.00809912	0.0786718	14.0869	8.48276
ENSMUSG00000108238	Gm43984	2864	predicted gene, 43984 [Source:MGI Symbol;Acc:MGI:5690376]	2.95687	0.00810211	0.0786718	3.60587	8.35716
ENSMUSG00000030878	Cdr2	5684	cerebellar degeneration-related 2 [Source:MGI Symbol;Acc:MGI:1100885]	2.24788	0.00810346	0.0786718	2.75319	5.12352
ENSMUSG00000005034	Prkacb	8772	protein kinase, cAMP dependent, catalytic, beta [Source:MGI Symbol;Acc:MGI:97594]	-1.31406	0.00811379	0.0787296	9.7935	6.00392
ENSMUSG00000038437	Mllt6	7451	myeloid/lymphoid or mixed-lineage leukemia; translocated to, 6 [Source:MGI Symbol;Acc:MGI:1935145]	1.39776	0.00812012	0.0787486	16.5371	18.6836
ENSMUSG00000118210	Gm50394	1047	predicted gene, 50394 [Source:MGI Symbol;Acc:MGI:6303299]	4.95078	0.00812824	0.0787848	0.599782	2.45478
ENSMUSG00000026657	Frmd4a	23468	FERM domain containing 4A [Source:MGI Symbol;Acc:MGI:1919850]	1.41024	0.00815334	0.0789844	2.88287	3.24416
ENSMUSG00000014075	Tctex1d2	2385	Tctex1 domain containing 2 [Source:MGI Symbol;Acc:MGI:1913311]	-2.08908	0.00815762	0.0789844	2.74944	1.0863
ENSMUSG00000032440	Tgfbr2	8187	transforming growth factor, beta receptor II [Source:MGI Symbol;Acc:MGI:98729]	1.96923	0.00816818	0.0790239	1.32376	2.10469
ENSMUSG00000021392	Nol8	9057	nucleolar protein 8 [Source:MGI Symbol;Acc:MGI:1918180]	-1.4568	0.00817049	0.0790239	2.03975	1.12788
ENSMUSG00000019857	Asf1a	3638	anti-silencing function 1A histone chaperone [Source:MGI Symbol;Acc:MGI:1913653]	-1.67917	0.0081778	0.079052	3.41321	1.65147
ENSMUSG00000049321	Zfp2	4019	zinc finger protein 2 [Source:MGI Symbol;Acc:MGI:99167]	-2.80618	0.00819499	0.0791757	2.21003	0.63566
ENSMUSG00000089854	Gm16133	4393	predicted gene 16133 [Source:MGI Symbol;Acc:MGI:3802155]	3.65304	0.00820404	0.0792205	0.399001	1.16495
ENSMUSG00000037225	Fgf2	6782	fibroblast growth factor 2 [Source:MGI Symbol;Acc:MGI:95516]	2.12629	0.00822877	0.0794167	0.974531	1.68026
ENSMUSG00000020605	Hs1bp3	3004	HCLS1 binding protein 3 [Source:MGI Symbol;Acc:MGI:1913224]	-1.98713	0.00823974	0.0794482	2.25544	0.915419
ENSMUSG00000047909	Ankrd16	5926	ankyrin repeat domain 16 [Source:MGI Symbol;Acc:MGI:2444796]	-1.89378	0.00824607	0.0794482	3.74428	1.55623
ENSMUSG00000022596	Slurp1	2933	secreted Ly6/Plaur domain containing 1 [Source:MGI Symbol;Acc:MGI:1930923]	20.148	0.00824836	0.0794482	0.0518064	0.899608
ENSMUSG00000029380	Cxcl1	1875	chemokine (C-X-C motif) ligand 1 [Source:MGI Symbol;Acc:MGI:108068]	9.43511	0.00824971	0.0794482	2.72024	21.1106
ENSMUSG00000087115	Pcsk2os2	3452	proprotein convertase subtilisin/kexin type 2, opposite strand 2 [Source:MGI Symbol;Acc:MGI:3649365]	-7.47534	0.00827342	0.0796339	1.58565	0.163467
ENSMUSG00000047586	Nccrp1	1531	non-specific cytotoxic cell receptor protein 1 homolog (zebrafish) [Source:MGI Symbol;Acc:MGI:2685009]	5.69476	0.00829027	0.079718	0.296205	1.43065
ENSMUSG00000028126	Pip5k1a	4383	phosphatidylinositol-4-phosphate 5-kinase, type 1 alpha [Source:MGI Symbol;Acc:MGI:107929]	1.43658	0.00829102	0.079718	7.04641	8.08046
ENSMUSG00000037936	Scarb1	8500	scavenger receptor class B, member 1 [Source:MGI Symbol;Acc:MGI:893578]	1.49695	0.00829648	0.0797278	5.84656	7.00328
ENSMUSG00000084146	Gm12104	979	predicted gene 12104 [Source:MGI Symbol;Acc:MGI:3650164]	-15.0063	0.00831345	0.0798482	1.2915	0.0684647
ENSMUSG00000044068	Zrsr1	4492	zinc finger (CCCH type), RNA binding motif and serine/arginine rich 1 [Source:MGI Symbol;Acc:MGI:98885]	1.38712	0.00832215	0.0798612	11.6172	12.9717
ENSMUSG00000010154	Spire2	2510	spire type actin nucleation factor 2 [Source:MGI Symbol;Acc:MGI:2446256]	2.82025	0.00832369	0.0798612	0.562622	1.28474
ENSMUSG00000108214	Gm43982	1829	predicted gene, 43982 [Source:MGI Symbol;Acc:MGI:5690374]	2.58329	0.00833956	0.0799708	4.65775	9.48949
ENSMUSG00000023027	Atf1	3060	activating transcription factor 1 [Source:MGI Symbol;Acc:MGI:1298366]	1.4851	0.00835586	0.080064	8.21358	9.84173
ENSMUSG00000029757	Dync1i1	3572	dynein cytoplasmic 1 intermediate chain 1 [Source:MGI Symbol;Acc:MGI:107743]	-1.4443	0.00835819	0.080064	31.6944	17.7966
ENSMUSG00000021130	Galnt16	8047	polypeptide N-acetylgalactosaminyltransferase 16 [Source:MGI Symbol;Acc:MGI:1917754]	3.76688	0.0083932	0.0803566	0.229389	0.701316
ENSMUSG00000005267	Zfp287	7632	zinc finger protein 287 [Source:MGI Symbol;Acc:MGI:2176561]	-1.89656	0.00841858	0.0805567	1.56978	0.665421
ENSMUSG00000014769	Psmb1	4595	proteasome (prosome, macropain) subunit, beta type 1 [Source:MGI Symbol;Acc:MGI:104884]	-1.38545	0.00845468	0.0808592	8.38566	4.91237
ENSMUSG00000018189	Uchl5	2921	ubiquitin carboxyl-terminal esterase L5 [Source:MGI Symbol;Acc:MGI:1914848]	-1.66766	0.00850161	0.0812617	4.54025	2.22729
ENSMUSG00000054404	Slfn5	6326	schlafen 5 [Source:MGI Symbol;Acc:MGI:1329004]	6.47898	0.00850582	0.0812617	0.0548095	0.293416
ENSMUSG00000095432	Zfp748	5662	zinc finger protein 748 [Source:MGI Symbol;Acc:MGI:1916455]	-1.8464	0.00851066	0.0812649	2.42791	1.07695
ENSMUSG00000032382	Snx1	4339	sorting nexin 1 [Source:MGI Symbol;Acc:MGI:1928395]	-1.40989	0.00852934	0.0813999	9.60463	5.52625
ENSMUSG00000022051	Bnip3l	3859	BCL2/adenovirus E1B interacting protein 3-like [Source:MGI Symbol;Acc:MGI:1332659]	-1.40149	0.0085357	0.0814175	70.4308	40.7605
ENSMUSG00000007379	Dennd2c	6858	DENN/MADD domain containing 2C [Source:MGI Symbol;Acc:MGI:3036254]	3.25898	0.00854481	0.0814611	0.164192	0.449274
ENSMUSG00000035824	Tk2	3571	thymidine kinase 2, mitochondrial [Source:MGI Symbol;Acc:MGI:1913266]	-1.72257	0.0085668	0.0816275	6.97385	3.27158
ENSMUSG00000071337	Tia1	15750	cytotoxic granule-associated RNA binding protein 1 [Source:MGI Symbol;Acc:MGI:107914]	-1.49059	0.00858335	0.0817054	3.22843	1.74429
ENSMUSG00000023088	Abcc1	15092	ATP-binding cassette, sub-family C (CFTR/MRP), member 1 [Source:MGI Symbol;Acc:MGI:102676]	1.38494	0.00858574	0.0817054	4.79602	5.30569
ENSMUSG00000025271	Pfkfb1	4017	6-phosphofructo-2-kinase/fructose-2,6-biphosphatase 1 [Source:MGI Symbol;Acc:MGI:107816]	4.44993	0.00858861	0.0817054	0.166644	0.591426
ENSMUSG00000046185	Zfp84	4113	zinc finger protein 84 [Source:MGI Symbol;Acc:MGI:107780]	-1.51853	0.00863089	0.0820642	5.78454	3.07875
ENSMUSG00000083621	Gm14586	408	predicted gene 14586 [Source:MGI Symbol;Acc:MGI:3705507]	-2.81516	0.0086381	0.0820893	15.0601	4.44
ENSMUSG00000024091	Vapa	3492	vesicle-associated membrane protein, associated protein A [Source:MGI Symbol;Acc:MGI:1353561]	1.39136	0.00866013	0.0822533	13.8428	15.5221
ENSMUSG00000097558	Gm26902	3702	predicted gene, 26902 [Source:MGI Symbol;Acc:MGI:5477396]	3.81986	0.0086645	0.0822533	0.327733	1.01729
ENSMUSG00000022752	Tomm70a	9777	translocase of outer mitochondrial membrane 70A [Source:MGI Symbol;Acc:MGI:106295]	-1.39517	0.00867326	0.082293	7.87146	4.56403
ENSMUSG00000043833	2900005J15Rik	2928	RIKEN cDNA 2900005J15 gene [Source:MGI Symbol;Acc:MGI:1914511]	-3.04396	0.00868064	0.0822963	1.44594	0.372416
ENSMUSG00000041268	Dmxl2	13285	Dmx-like 2 [Source:MGI Symbol;Acc:MGI:2444630]	1.53273	0.00868277	0.0822963	6.08362	7.52767
ENSMUSG00000021754	Map3k1	7447	mitogen-activated protein kinase kinase kinase 1 [Source:MGI Symbol;Acc:MGI:1346872]	-1.36158	0.00870088	0.0824219	24.6606	14.5044
ENSMUSG00000100291	2310069B03Rik	1902	RIKEN cDNA 2310069B03 gene [Source:MGI Symbol;Acc:MGI:1916902]	142.193	0.00870518	0.0824219	0	0.371349
ENSMUSG00000042279	H1foo	1201	H1 histone family, member O, oocyte-specific [Source:MGI Symbol;Acc:MGI:2176207]	7.8942	0.00871259	0.0824463	0.396858	2.45262
ENSMUSG00000024246	Thumpd2	2239	THUMP domain containing 2 [Source:MGI Symbol;Acc:MGI:1919417]	-3.16447	0.00871693	0.0824463	3.15463	0.830434
ENSMUSG00000031352	Hccs	5151	holocytochrome c synthetase [Source:MGI Symbol;Acc:MGI:106911]	1.88295	0.00872908	0.0825178	1.63392	2.46947
ENSMUSG00000022664	Slc35a5	8105	solute carrier family 35, member A5 [Source:MGI Symbol;Acc:MGI:1921352]	-1.67785	0.00873876	0.0825659	1.77517	0.859013
ENSMUSG00000003135	Cnot11	3508	CCR4-NOT transcription complex, subunit 11 [Source:MGI Symbol;Acc:MGI:106580]	-1.56059	0.0087472	0.0826023	6.45143	3.36307
ENSMUSG00000002658	Gtf2f1	1717	general transcription factor IIF, polypeptide 1 [Source:MGI Symbol;Acc:MGI:1923848]	1.37397	0.00875486	0.0826311	22.4705	24.9131
ENSMUSG00000031487	Brf2	3212	BRF2, RNA polymerase III transcription initiation factor 50kDa subunit [Source:MGI Symbol;Acc:MGI:1913903]	-1.99816	0.00877241	0.0827534	2.64179	1.0477
ENSMUSG00000037095	Lrg1	1408	leucine-rich alpha-2-glycoprotein 1 [Source:MGI Symbol;Acc:MGI:1924155]	41.2436	0.00879249	0.0828993	0	0.152933
ENSMUSG00000105602	Gm10636	2419	predicted gene 10636 [Source:MGI Symbol;Acc:MGI:3641739]	5.14919	0.00880898	0.0829685	0.14858	0.616917
ENSMUSG00000041995	Zbed3	2231	zinc finger, BED type containing 3 [Source:MGI Symbol;Acc:MGI:1919364]	-1.81082	0.00881375	0.0829685	5.282	2.38737
ENSMUSG00000039759	Thap3	1334	THAP domain containing, apoptosis associated protein 3 [Source:MGI Symbol;Acc:MGI:1917126]	-2.38379	0.00881784	0.0829685	3.33596	1.12833
ENSMUSG00000104947	Gm43721	2313	predicted gene 43721 [Source:MGI Symbol;Acc:MGI:5663858]	8.46279	0.00881828	0.0829685	0.0792352	0.569508
ENSMUSG00000045409	Trim39	7223	tripartite motif-containing 39 [Source:MGI Symbol;Acc:MGI:1890659]	1.43504	0.00882855	0.0830216	3.11518	3.61069
ENSMUSG00000034343	Ube2f	8842	ubiquitin-conjugating enzyme E2F (putative) [Source:MGI Symbol;Acc:MGI:1915171]	1.56755	0.00885713	0.0832468	2.9776	3.78304
ENSMUSG00000039270	Megf9	8226	multiple EGF-like-domains 9 [Source:MGI Symbol;Acc:MGI:1918264]	-1.49351	0.00886298	0.0832583	19.0986	10.3116
ENSMUSG00000026872	Zeb2	20203	zinc finger E-box binding homeobox 2 [Source:MGI Symbol;Acc:MGI:1344407]	1.31406	0.00887321	0.0832873	11.9592	12.6427
ENSMUSG00000002289	Angptl4	3541	angiopoietin-like 4 [Source:MGI Symbol;Acc:MGI:1888999]	5.57164	0.00888447	0.0832873	4.59005	20.4534
ENSMUSG00000035093	Secisbp2l	8222	SECIS binding protein 2-like [Source:MGI Symbol;Acc:MGI:1917604]	-1.32106	0.00888521	0.0832873	24.0253	14.7141
ENSMUSG00000053702	Nebl	15235	nebulette [Source:MGI Symbol;Acc:MGI:1921353]	2.0612	0.00888579	0.0832873	1.59206	2.65509
ENSMUSG00000030446	Zfp273	3799	zinc finger protein 273 [Source:MGI Symbol;Acc:MGI:3036278]	-4.63735	0.00888922	0.0832873	1.12356	0.194287
ENSMUSG00000052962	Mrpl35	4171	mitochondrial ribosomal protein L35 [Source:MGI Symbol;Acc:MGI:1913473]	-1.85926	0.00891766	0.0835101	2.07556	0.914384
ENSMUSG00000044033	Ccdc141	11717	coiled-coil domain containing 141 [Source:MGI Symbol;Acc:MGI:1919735]	1.80268	0.00893032	0.0835852	0.949031	1.37618
ENSMUSG00000015659	Serac1	4576	serine active site containing 1 [Source:MGI Symbol;Acc:MGI:2447813]	2.02925	0.00893996	0.0836112	2.33175	3.78255
ENSMUSG00000063236	1110038F14Rik	1916	RIKEN cDNA 1110038F14 gene [Source:MGI Symbol;Acc:MGI:2152337]	-1.7309	0.00894239	0.0836112	8.21886	3.85979
ENSMUSG00000078234	Klhdc7a	7807	kelch domain containing 7A [Source:MGI Symbol;Acc:MGI:2444612]	1.59423	0.00896321	0.0837076	1.83514	2.36515
ENSMUSG00000026556	Vangl2	6990	VANGL planar cell polarity 2 [Source:MGI Symbol;Acc:MGI:2135272]	-1.69637	0.00896409	0.0837076	4.13583	1.97918
ENSMUSG00000048280	Zfp738	15129	zinc finger protein 738 [Source:MGI Symbol;Acc:MGI:3040706]	-1.70438	0.00896667	0.0837076	0.881679	0.419004
ENSMUSG00000085731	Gm16229	1232	predicted gene 16229 [Source:MGI Symbol;Acc:MGI:3802021]	80.3372	0.0089896	0.0838781	0	0.347813
ENSMUSG00000034071	Zfp551	2636	zinc fingr protein 551 [Source:MGI Symbol;Acc:MGI:3588205]	-4.3316	0.00900056	0.0839368	2.05622	0.388997
ENSMUSG00000017837	Nkiras2	3578	NFKB inhibitor interacting Ras-like protein 2 [Source:MGI Symbol;Acc:MGI:1919216]	-1.51703	0.00901871	0.0840624	6.35156	3.37875
ENSMUSG00000030523	Trpm1	14746	transient receptor potential cation channel, subfamily M, member 1 [Source:MGI Symbol;Acc:MGI:1330305]	1.74489	0.00904011	0.0842144	10.0261	14.1171
ENSMUSG00000062480	Acat3	2427	acetyl-Coenzyme A acetyltransferase 3 [Source:MGI Symbol;Acc:MGI:109182]	4.14508	0.00904826	0.0842144	0.125513	0.425929
ENSMUSG00000031201	Brcc3	7887	BRCA1/BRCA2-containing complex, subunit 3 [Source:MGI Symbol;Acc:MGI:2389572]	-1.48148	0.00904907	0.0842144	2.53917	1.38701
ENSMUSG00000066595	Flvcr1	5177	feline leukemia virus subgroup C cellular receptor 1 [Source:MGI Symbol;Acc:MGI:2444881]	1.49662	0.00906925	0.0843564	5.31289	6.42848
ENSMUSG00000085201	Nr6a1os	801	nuclear receptor subfamily 6, group A, member 1, opposite strand [Source:MGI Symbol;Acc:MGI:3649430]	-5.22887	0.00907371	0.0843564	4.04391	0.610083
ENSMUSG00000030087	Klf15	2791	Kruppel-like factor 15 [Source:MGI Symbol;Acc:MGI:1929988]	-4.1902	0.00910346	0.0845892	13.5184	2.57435
ENSMUSG00000018986	Slfn3	3411	schlafen 3 [Source:MGI Symbol;Acc:MGI:1329005]	-2.4335	0.00911146	0.0846199	1.18812	0.387976
ENSMUSG00000057751	Megf6	7877	multiple EGF-like-domains 6 [Source:MGI Symbol;Acc:MGI:1919351]	1.65092	0.00913129	0.0847603	1.78578	2.39335
ENSMUSG00000027797	Dclk1	15296	doublecortin-like kinase 1 [Source:MGI Symbol;Acc:MGI:1330861]	1.88051	0.0091693	0.0850274	1.4785	2.24468
ENSMUSG00000027075	Slc43a1	5716	solute carrier family 43, member 1 [Source:MGI Symbol;Acc:MGI:1931352]	4.44705	0.00916953	0.0850274	0.108467	0.387198
ENSMUSG00000039787	Cercam	3383	cerebral endothelial cell adhesion molecule [Source:MGI Symbol;Acc:MGI:2139134]	-1.83586	0.00918691	0.0851276	2.27939	1.0083
ENSMUSG00000002129	Sf3a1	6147	splicing factor 3a, subunit 1 [Source:MGI Symbol;Acc:MGI:1914715]	-1.34407	0.0091898	0.0851276	13.0605	7.82453
ENSMUSG00000068696	Gpr88	3504	G-protein coupled receptor 88 [Source:MGI Symbol;Acc:MGI:1927653]	14.836	0.00919476	0.0851297	0.0171786	0.209948
ENSMUSG00000026473	Glul	3782	glutamate-ammonia ligase (glutamine synthetase) [Source:MGI Symbol;Acc:MGI:95739]	2.34032	0.00922132	0.0853051	125.583	239.043
ENSMUSG00000026426	Arl8a	2299	ADP-ribosylation factor-like 8A [Source:MGI Symbol;Acc:MGI:1915974]	-1.35008	0.00922705	0.0853051	20.1612	11.997
ENSMUSG00000037152	Ndufc1	1495	NADH:ubiquinone oxidoreductase subunit C1 [Source:MGI Symbol;Acc:MGI:1913627]	-1.83011	0.00923177	0.0853051	9.33869	4.14161
ENSMUSG00000038718	Pbx3	6109	pre B cell leukemia homeobox 3 [Source:MGI Symbol;Acc:MGI:97496]	-1.36896	0.00923269	0.0853051	11.81	6.97604
ENSMUSG00000039578	Ccser1	9635	coiled-coil serine rich 1 [Source:MGI Symbol;Acc:MGI:3045354]	2.23383	0.00924968	0.0854068	0.413756	0.740505
ENSMUSG00000024953	Prdx5	2139	peroxiredoxin 5 [Source:MGI Symbol;Acc:MGI:1859821]	-1.33835	0.0092564	0.0854068	47.8772	29.1071
ENSMUSG00000063972	Nr6a1	10824	nuclear receptor subfamily 6, group A, member 1 [Source:MGI Symbol;Acc:MGI:1352459]	1.80598	0.00925794	0.0854068	1.34561	1.93791
ENSMUSG00000034412	Tbc1d10a	2733	TBC1 domain family, member 10a [Source:MGI Symbol;Acc:MGI:2144164]	1.58451	0.00926978	0.0854721	5.37304	6.93354
ENSMUSG00000001642	Akr1b3	8384	aldo-keto reductase family 1, member B3 (aldose reductase) [Source:MGI Symbol;Acc:MGI:1353494]	-1.70977	0.0092927	0.0856395	6.5259	3.0832
ENSMUSG00000033307	Mif	745	macrophage migration inhibitory factor (glycosylation-inhibiting factor) [Source:MGI Symbol;Acc:MGI:96982]	-1.43704	0.00930314	0.0856918	146.644	83.0532
ENSMUSG00000040345	Arhgap9	3787	Rho GTPase activating protein 9 [Source:MGI Symbol;Acc:MGI:2143764]	52.5264	0.00930791	0.0856919	0	0.0705687
ENSMUSG00000004677	Myo9b	7496	myosin IXb [Source:MGI Symbol;Acc:MGI:106624]	1.45172	0.0093137	0.0857013	16.908	19.6486
ENSMUSG00000033014	Trim33	9805	tripartite motif-containing 33 [Source:MGI Symbol;Acc:MGI:2137357]	-1.36824	0.00931902	0.0857064	6.17769	3.64376
ENSMUSG00000037111	Setd7	10813	SET domain containing (lysine methyltransferase) 7 [Source:MGI Symbol;Acc:MGI:1920501]	-1.43975	0.00932444	0.0857123	33.1748	18.6737
ENSMUSG00000036442	Thap11	1819	THAP domain containing 11 [Source:MGI Symbol;Acc:MGI:1930964]	-1.73486	0.00934098	0.0858205	5.72489	2.6298
ENSMUSG00000051007	Gatd1	3633	glutamine amidotransferase like class 1 domain containing 1 [Source:MGI Symbol;Acc:MGI:2387178]	-2.01474	0.00935342	0.0858909	1.81993	0.728584
ENSMUSG00000022126	Acod1	2623	aconitate decarboxylase 1 [Source:MGI Symbol;Acc:MGI:103206]	79.0686	0.00936249	0.0859303	0	0.147811
ENSMUSG00000021327	Zkscan3	7974	zinc finger with KRAB and SCAN domains 3 [Source:MGI Symbol;Acc:MGI:1919989]	-1.56923	0.00938494	0.0860924	2.79633	1.42662
ENSMUSG00000057454	Lypd3	1649	Ly6/Plaur domain containing 3 [Source:MGI Symbol;Acc:MGI:1919684]	59.6365	0.00940206	0.0861669	0.00914353	0.601795
ENSMUSG00000041773	Enc1	4737	ectodermal-neural cortex 1 [Source:MGI Symbol;Acc:MGI:109610]	2.05888	0.00940264	0.0861669	0.645786	1.07536
ENSMUSG00000036503	Rnf13	10019	ring finger protein 13 [Source:MGI Symbol;Acc:MGI:1346341]	-1.33179	0.00941422	0.0862145	9.30466	5.66431
ENSMUSG00000105586	Gm43009	3566	predicted gene 43009 [Source:MGI Symbol;Acc:MGI:5663146]	2.92264	0.00941743	0.0862145	0.421305	0.994586
ENSMUSG00000031146	Plp2	1334	proteolipid protein 2 [Source:MGI Symbol;Acc:MGI:1298382]	1.60999	0.009431	0.0862949	8.97915	11.5777
ENSMUSG00000034639	Setmar	1765	SET domain without mariner transposase fusion [Source:MGI Symbol;Acc:MGI:1921979]	-4.50654	0.00943749	0.0863103	2.11297	0.372447
ENSMUSG00000044636	Csrnp2	4375	cysteine-serine-rich nuclear protein 2 [Source:MGI Symbol;Acc:MGI:2386852]	1.88345	0.00944256	0.0863128	1.68098	2.54915
ENSMUSG00000111421	Gm47643	3236	predicted gene, 47643 [Source:MGI Symbol;Acc:MGI:6096720]	-26.6534	0.00948692	0.0866742	0.217971	0.00520501
ENSMUSG00000029076	Sdf4	6115	stromal cell derived factor 4 [Source:MGI Symbol;Acc:MGI:108079]	-1.37693	0.00950503	0.086782	27.7325	16.4181
ENSMUSG00000034075	Zdhhc5	5047	zinc finger, DHHC domain containing 5 [Source:MGI Symbol;Acc:MGI:1923573]	1.28822	0.00951145	0.086782	19.262	20.0452
ENSMUSG00000029201	Ugdh	6752	UDP-glucose dehydrogenase [Source:MGI Symbol;Acc:MGI:1306785]	2.02312	0.0095132	0.086782	1.56134	2.50857
ENSMUSG00000035049	Rrp12	4340	ribosomal RNA processing 12 homolog (S. cerevisiae) [Source:MGI Symbol;Acc:MGI:2147437]	1.64834	0.00953033	0.086891	3.99162	5.28509
ENSMUSG00000039849	Pcif1	6544	PDX1 C-terminal inhibiting factor 1 [Source:MGI Symbol;Acc:MGI:2443858]	-1.37291	0.00953481	0.086891	6.17653	3.65393
ENSMUSG00000062014	Gmfb	6844	glia maturation factor, beta [Source:MGI Symbol;Acc:MGI:1927133]	-1.46788	0.00956722	0.0871422	4.45059	2.44433
ENSMUSG00000024383	Map3k2	13950	mitogen-activated protein kinase kinase kinase 2 [Source:MGI Symbol;Acc:MGI:1346873]	1.4118	0.00958164	0.087185	4.86952	5.55774
ENSMUSG00000117294	Gm49839	3612	predicted gene, 49839 [Source:MGI Symbol;Acc:MGI:6270508]	-2.56107	0.00958453	0.087185	2.9289	0.910379
ENSMUSG00000065604	Mir29b-1	71	microRNA 29b-1 [Source:MGI Symbol;Acc:MGI:2676905]	4.12708	0.00958647	0.087185	8.30811	28.6077
ENSMUSG00000058153	Sez6l	6070	seizure related 6 homolog like [Source:MGI Symbol;Acc:MGI:1935121]	-1.48698	0.00960552	0.0873141	11.1805	6.10302
ENSMUSG00000110558	Gm45779	4064	predicted gene 45779 [Source:MGI Symbol;Acc:MGI:5804894]	2.06556	0.00961653	0.08737	1.31811	2.18812
ENSMUSG00000069114	Zbtb10	7414	zinc finger and BTB domain containing 10 [Source:MGI Symbol;Acc:MGI:2139883]	1.4382	0.00963511	0.0874946	4.98541	5.80514
ENSMUSG00000036646	Man1b1	5391	mannosidase, alpha, class 1B, member 1 [Source:MGI Symbol;Acc:MGI:2684954]	-1.34404	0.00964406	0.0875317	10.0361	6.02005
ENSMUSG00000048732	Klhl11	2393	kelch-like 11 [Source:MGI Symbol;Acc:MGI:2388648]	-1.42848	0.00965626	0.0875981	14.7087	8.37379
ENSMUSG00000001098	Kctd10	4039	potassium channel tetramerisation domain containing 10 [Source:MGI Symbol;Acc:MGI:2141207]	2.16881	0.00966253	0.0876108	11.273	19.6844
ENSMUSG00000026247	Ecel1	3500	endothelin converting enzyme-like 1 [Source:MGI Symbol;Acc:MGI:1343461]	20.0114	0.00967418	0.0876723	0.00430791	0.0996984
ENSMUSG00000034430	Zxdc	8254	ZXD family zinc finger C [Source:MGI Symbol;Acc:MGI:1933108]	-1.46296	0.00968784	0.0877518	3.71367	2.03645
ENSMUSG00000078878	Gm14305	2500	predicted gene 14305 [Source:MGI Symbol;Acc:MGI:3709632]	-2.84162	0.00970121	0.0878026	2.2055	0.639098
ENSMUSG00000009471	Myod1	1861	myogenic differentiation 1 [Source:MGI Symbol;Acc:MGI:97275]	75.282	0.00970711	0.0878026	0	0.220313
ENSMUSG00000073664	Nbeal1	28441	neurobeachin like 1 [Source:MGI Symbol;Acc:MGI:2444343]	-1.35045	0.00970809	0.0878026	3.82023	2.26784
ENSMUSG00000020941	Map3k14	6550	mitogen-activated protein kinase kinase kinase 14 [Source:MGI Symbol;Acc:MGI:1858204]	1.7052	0.00971637	0.0878333	2.4844	3.41006
ENSMUSG00000038976	Ppp1r9b	5083	protein phosphatase 1, regulatory subunit 9B [Source:MGI Symbol;Acc:MGI:2387581]	1.44965	0.00974794	0.0880579	21.0808	24.718
ENSMUSG00000074166	AW146154	6093	expressed sequence AW146154 [Source:MGI Symbol;Acc:MGI:2142212]	-2.67566	0.00975101	0.0880579	1.09732	0.333786
ENSMUSG00000024965	Fermt3	5784	fermitin family member 3 [Source:MGI Symbol;Acc:MGI:2147790]	3.356	0.00976107	0.088071	0.254623	0.707219
ENSMUSG00000038147	Cd84	6272	CD84 antigen [Source:MGI Symbol;Acc:MGI:1336885]	5.72105	0.00976227	0.088071	0.0289166	0.141011
ENSMUSG00000043090	Zfp866	5601	zinc finger protein 866 [Source:MGI Symbol;Acc:MGI:3584369]	-1.62809	0.00978383	0.0881979	3.98044	1.96958
ENSMUSG00000003348	Mob3a	3254	MOB kinase activator 3A [Source:MGI Symbol;Acc:MGI:3050117]	2.01342	0.00978614	0.0881979	1.23012	1.98222
ENSMUSG00000041684	Bivm	4206	basic, immunoglobulin-like variable motif containing [Source:MGI Symbol;Acc:MGI:2179809]	-2.22698	0.00979742	0.0882553	1.7455	0.647527
ENSMUSG00000098068	Gm7909	614	predicted gene 7909 [Source:MGI Symbol;Acc:MGI:3645643]	2.64157	0.00985605	0.088739	2.8869	6.14206
ENSMUSG00000003810	Mast2	7645	microtubule associated serine/threonine kinase 2 [Source:MGI Symbol;Acc:MGI:894676]	1.47002	0.00987584	0.0888726	14.851	17.3972
ENSMUSG00000074577	Ripor3	4244	RIPOR family member 3 [Source:MGI Symbol;Acc:MGI:1916803]	8.67453	0.00988706	0.0889	0.112357	0.78657
[truncated: 15,981 more rows]

## Sheet: Statistically Significant
gene_id	SYMBOL	coding_length	DESCRIPTION	Fold_Change	PValue	FDR	WT_0H_DNA1_Avg_FPKM	WT_6H_DNA1_Avg_FPKM
ENSMUSG00000034640	Tiparp	4358	TCDD-inducible poly(ADP-ribose) polymerase [Source:MGI Symbol;Acc:MGI:2159210]	5.93413	1.19018e-10	2.13993e-06	12.4398	59.2262
ENSMUSG00000029161	Cgref1	2082	cell growth regulator with EF hand domain 1 [Source:MGI Symbol;Acc:MGI:1915817]	23.9067	3.73059e-10	3.3538e-06	1.14607	21.789
ENSMUSG00000026479	Lamc2	8039	laminin, gamma 2 [Source:MGI Symbol;Acc:MGI:99913]	10.4911	2.28402e-09	1.36889e-05	1.50033	12.7468
ENSMUSG00000035621	Midn	4307	midnolin [Source:MGI Symbol;Acc:MGI:1890222]	5.82792	4.05991e-09	1.82493e-05	14.5641	68.1715
ENSMUSG00000070687	Htr1d	3201	5-hydroxytryptamine (serotonin) receptor 1D [Source:MGI Symbol;Acc:MGI:96276]	29.3721	7.24928e-09	2.3883e-05	0.535608	13.0585
ENSMUSG00000029708	Gcc1	5287	golgi coiled coil 1 [Source:MGI Symbol;Acc:MGI:1921625]	5.62996	7.96987e-09	2.3883e-05	4.50183	20.1672
ENSMUSG00000005483	Dnajb1	3204	DnaJ heat shock protein family (Hsp40) member B1 [Source:MGI Symbol;Acc:MGI:1931874]	7.14339	1.1834e-08	2.68646e-05	12.5192	71.6837
ENSMUSG00000071076	Jund	1668	jun D proto-oncogene [Source:MGI Symbol;Acc:MGI:96648]	5.72108	1.31135e-08	2.68646e-05	163.825	752.178
ENSMUSG00000056313	Tcim	1805	transcriptional and immune response regulator [Source:MGI Symbol;Acc:MGI:1916318]	11.2548	1.34472e-08	2.68646e-05	3.36698	30.8218
ENSMUSG00000027829	Ccnl1	5997	cyclin L1 [Source:MGI Symbol;Acc:MGI:1922664]	4.06186	2.3099e-08	3.50736e-05	10.31	33.4678
ENSMUSG00000028525	Pde4b	10560	phosphodiesterase 4B, cAMP specific [Source:MGI Symbol;Acc:MGI:99557]	9.47002	2.374e-08	3.50736e-05	0.918941	7.08543
ENSMUSG00000042608	Stk40	4117	serine/threonine kinase 40 [Source:MGI Symbol;Acc:MGI:1921428]	5.79562	2.43816e-08	3.50736e-05	5.31955	24.7979
ENSMUSG00000043702	Pde12	7725	phosphodiesterase 12 [Source:MGI Symbol;Acc:MGI:2443226]	4.8085	2.53591e-08	3.50736e-05	2.00002	7.69258
ENSMUSG00000021385	Ippk	4831	inositol 1,3,4,5,6-pentakisphosphate 2-kinase [Source:MGI Symbol;Acc:MGI:1922928]	6.79053	3.52237e-08	4.38865e-05	1.62944	8.8509
ENSMUSG00000033039	Micall1	8341	microtubule associated monooxygenase, calponin and LIM domain containing -like 1 [Source:MGI Symbol;Acc:MGI:105870]	2.9036	3.76518e-08	4.38865e-05	6.83294	16.0371
ENSMUSG00000020572	Nampt	5054	nicotinamide phosphoribosyltransferase [Source:MGI Symbol;Acc:MGI:1929865]	3.86996	3.97044e-08	4.38865e-05	7.468	23.1848
ENSMUSG00000027806	Tsc22d2	11244	TSC22 domain family, member 2 [Source:MGI Symbol;Acc:MGI:1919283]	5.20992	4.16119e-08	4.38865e-05	15.0379	62.9454
ENSMUSG00000050931	Sgms2	6227	sphingomyelin synthase 2 [Source:MGI Symbol;Acc:MGI:1921692]	7.91965	4.52219e-08	4.38865e-05	1.25851	7.98288
ENSMUSG00000071637	Cebpd	3746	CCAAT/enhancer binding protein (C/EBP), delta [Source:MGI Symbol;Acc:MGI:103573]	8.21911	4.80627e-08	4.38865e-05	9.21592	61.0603
ENSMUSG00000030208	Emp1	5935	epithelial membrane protein 1 [Source:MGI Symbol;Acc:MGI:107941]	51.2837	4.8817e-08	4.38865e-05	1.85428	76.356
ENSMUSG00000021127	Zfp36l1	2990	zinc finger protein 36, C3H type-like 1 [Source:MGI Symbol;Acc:MGI:107946]	9.75241	7.07417e-08	5.54623e-05	3.64131	28.8063
ENSMUSG00000023030	Slc11a2	6354	solute carrier family 11 (proton-coupled divalent metal ion transporters), member 2 [Source:MGI Symbol;Acc:MGI:1345279]	3.56443	7.26001e-08	5.54623e-05	3.49626	10.0323
ENSMUSG00000035929	H2-Q4	2596	histocompatibility 2, Q region locus 4 [Source:MGI Symbol;Acc:MGI:95933]	16.8945	7.31128e-08	5.54623e-05	6.16965	82.4329
ENSMUSG00000037876	Jmjd1c	17822	jumonji domain containing 1C [Source:MGI Symbol;Acc:MGI:1918614]	3.97297	7.4032e-08	5.54623e-05	11.1065	35.2338
ENSMUSG00000050910	Cdr2l	3700	cerebellar degeneration-related protein 2-like [Source:MGI Symbol;Acc:MGI:2684867]	9.7904	8.12756e-08	5.65839e-05	1.35075	10.5175
ENSMUSG00000026558	Uck2	5464	uridine-cytidine kinase 2 [Source:MGI Symbol;Acc:MGI:1931744]	6.03539	8.18233e-08	5.65839e-05	6.37574	30.9462
ENSMUSG00000028849	Map7d1	3652	MAP7 domain containing 1 [Source:MGI Symbol;Acc:MGI:2384297]	3.36595	8.76743e-08	5.83846e-05	34.56	93.8988
ENSMUSG00000056708	Ier5	3276	immediate early response 5 [Source:MGI Symbol;Acc:MGI:1337072]	12.304	9.63216e-08	5.95139e-05	5.54902	55.8215
ENSMUSG00000009291	Pttg1ip	3877	pituitary tumor-transforming 1 interacting protein [Source:MGI Symbol;Acc:MGI:2652132]	3.63845	9.81739e-08	5.95139e-05	10.8805	31.7825
ENSMUSG00000028063	Lmna	5838	lamin A [Source:MGI Symbol;Acc:MGI:96794]	7.48811	1.03448e-07	5.95139e-05	20.7378	125.124
ENSMUSG00000018476	Kdm6b	6954	KDM1 lysine (K)-specific demethylase 6B [Source:MGI Symbol;Acc:MGI:2448492]	6.50365	1.03465e-07	5.95139e-05	17.4592	91.8843
ENSMUSG00000035356	Nfkbiz	5018	nuclear factor of kappa light polypeptide gene enhancer in B cells inhibitor, zeta [Source:MGI Symbol;Acc:MGI:1931595]	7.32418	1.10229e-07	5.95139e-05	5.90451	34.497
ENSMUSG00000038552	Fndc4	3039	fibronectin type III domain containing 4 [Source:MGI Symbol;Acc:MGI:1917195]	4.04269	1.1064e-07	5.95139e-05	10.8429	35.1852
ENSMUSG00000021890	Eaf1	5490	ELL associated factor 1 [Source:MGI Symbol;Acc:MGI:1921677]	3.32013	1.1254e-07	5.95139e-05	9.67039	25.908
ENSMUSG00000032497	Lrrfip2	6334	leucine rich repeat (in FLII) interacting protein 2 [Source:MGI Symbol;Acc:MGI:1918518]	2.90713	1.43081e-07	7.35027e-05	11.6446	27.1179
ENSMUSG00000037533	Rapgef6	13295	Rap guanine nucleotide exchange factor (GEF) 6 [Source:MGI Symbol;Acc:MGI:2384761]	3.76552	1.51395e-07	7.56133e-05	2.5317	7.57192
ENSMUSG00000034751	Mast4	32326	microtubule associated serine/threonine kinase family member 4 [Source:MGI Symbol;Acc:MGI:1918885]	3.36821	1.56739e-07	7.61666e-05	3.12074	8.46317
ENSMUSG00000046962	Zbtb21	6335	zinc finger and BTB domain containing 21 [Source:MGI Symbol;Acc:MGI:1927240]	3.27163	1.64908e-07	7.7443e-05	5.97252	15.6264
ENSMUSG00000037552	Plekhg2	6797	pleckstrin homology domain containing, family G (with RhoGef domain) member 2 [Source:MGI Symbol;Acc:MGI:2141874]	3.51445	1.71091e-07	7.7443e-05	4.14929	11.6884
ENSMUSG00000074151	Nlrc5	8493	NLR family, CARD domain containing 5 [Source:MGI Symbol;Acc:MGI:3612191]	12.5578	1.72287e-07	7.7443e-05	0.229463	2.3396
ENSMUSG00000042507	Elmsan1	7611	ELM2 and Myb/SANT-like domain containing 1 [Source:MGI Symbol;Acc:MGI:2685106]	3.64559	1.84348e-07	8.08433e-05	8.5745	24.9747
ENSMUSG00000004455	Ppp1cc	3424	protein phosphatase 1 catalytic subunit gamma [Source:MGI Symbol;Acc:MGI:104872]	2.98842	2.13732e-07	9.14977e-05	10.3677	24.7321
ENSMUSG00000116657	Gm49774	10812	predicted gene, 49774 [Source:MGI Symbol;Acc:MGI:6215288]	8.7032	2.28206e-07	9.54218e-05	0.219979	1.56511
ENSMUSG00000026663	Atf6	9231	activating transcription factor 6 [Source:MGI Symbol;Acc:MGI:1926157]	2.97619	2.35557e-07	9.62572e-05	5.42372	12.8937
ENSMUSG00000041319	Thoc6	2026	THO complex 6 [Source:MGI Symbol;Acc:MGI:2677480]	4.42514	2.49859e-07	9.98327e-05	2.82468	10.0082
ENSMUSG00000039646	Vasn	3007	vasorin [Source:MGI Symbol;Acc:MGI:2177651]	4.42974	2.58037e-07	0.000100859	11.9739	43.3025
ENSMUSG00000024014	Pim1	3362	proviral integration site 1 [Source:MGI Symbol;Acc:MGI:97584]	5.45583	2.76871e-07	0.000105918	19.3208	86.0511
ENSMUSG00000028862	Map3k6	4604	mitogen-activated protein kinase kinase kinase 6 [Source:MGI Symbol;Acc:MGI:1855691]	4.98441	2.9084e-07	0.00010747	1.06182	4.29292
ENSMUSG00000015312	Gadd45b	1589	growth arrest and DNA-damage-inducible 45 beta [Source:MGI Symbol;Acc:MGI:107776]	5.14682	3.06211e-07	0.00010747	13.5128	55.723
ENSMUSG00000035671	Zswim4	4625	zinc finger SWIM-type containing 4 [Source:MGI Symbol;Acc:MGI:2443726]	3.17921	3.16759e-07	0.00010747	7.02663	17.9998
ENSMUSG00000073700	Klhl21	3986	kelch-like 21 [Source:MGI Symbol;Acc:MGI:1919288]	2.98247	3.28889e-07	0.00010747	9.87485	23.6502
ENSMUSG00000031530	Dusp4	2740	dual specificity phosphatase 4 [Source:MGI Symbol;Acc:MGI:2442191]	6.62743	3.30278e-07	0.00010747	6.02835	31.7618
ENSMUSG00000024486	Hbegf	4834	heparin-binding EGF-like growth factor [Source:MGI Symbol;Acc:MGI:96070]	4.75719	3.30441e-07	0.00010747	26.6438	102.779
ENSMUSG00000001131	Timp1	888	tissue inhibitor of metalloproteinase 1 [Source:MGI Symbol;Acc:MGI:98752]	5.17838	3.33332e-07	0.00010747	2.80964	11.6816
ENSMUSG00000038612	Mcl1	3418	myeloid cell leukemia sequence 1 [Source:MGI Symbol;Acc:MGI:101769]	2.96491	3.33865e-07	0.00010747	41.9309	100.423
ENSMUSG00000020400	Tnip1	3539	TNFAIP3 interacting protein 1 [Source:MGI Symbol;Acc:MGI:1926194]	3.64151	3.34722e-07	0.00010747	12.1741	35.7268
ENSMUSG00000001627	Ifrd1	5858	interferon-related developmental regulator 1 [Source:MGI Symbol;Acc:MGI:1316717]	7.30939	3.44867e-07	0.000108229	9.07602	53.1425
ENSMUSG00000007812	Zfp655	5598	zinc finger protein 655 [Source:MGI Symbol;Acc:MGI:1919861]	2.85914	3.52034e-07	0.000108229	8.45873	19.4768
ENSMUSG00000103313	Gm38357	2464	predicted gene, 38357 [Source:MGI Symbol;Acc:MGI:5611585]	9.42906	3.55145e-07	0.000108229	1.70501	12.975
ENSMUSG00000018171	Vmp1	3862	vacuole membrane protein 1 [Source:MGI Symbol;Acc:MGI:1923159]	3.59808	3.7333e-07	0.000111875	6.82632	19.9558
ENSMUSG00000032014	Oaf	2629	out at first homolog [Source:MGI Symbol;Acc:MGI:94852]	3.09641	3.95443e-07	0.000116558	13.9578	34.6764
ENSMUSG00000000628	Hk2	5969	hexokinase 2 [Source:MGI Symbol;Acc:MGI:1315197]	3.55374	4.19445e-07	0.000120234	28.1291	81.0257
ENSMUSG00000031309	Rps6ka3	8322	ribosomal protein S6 kinase polypeptide 3 [Source:MGI Symbol;Acc:MGI:104557]	3.1452	4.21288e-07	0.000120234	4.29823	10.8076
ENSMUSG00000020023	Tmcc3	7153	transmembrane and coiled coil domains 3 [Source:MGI Symbol;Acc:MGI:2442900]	2.9999	4.31966e-07	0.000120441	11.5616	27.8254
ENSMUSG00000024907	Gal	788	galanin and GMAP prepropeptide [Source:MGI Symbol;Acc:MGI:95637]	11.9207	4.42176e-07	0.000120441	0.895723	8.68437
ENSMUSG00000031825	Crispld2	4777	cysteine-rich secretory protein LCCL domain containing 2 [Source:MGI Symbol;Acc:MGI:1926142]	7.98352	4.43236e-07	0.000120441	3.27454	21.349
ENSMUSG00000019864	Rtn4ip1	4554	reticulon 4 interacting protein 1 [Source:MGI Symbol;Acc:MGI:2178759]	4.62618	4.48808e-07	0.000120441	3.27139	12.0906
ENSMUSG00000017929	B4galt5	4308	UDP-Gal:betaGlcNAc beta 1,4-galactosyltransferase, polypeptide 5 [Source:MGI Symbol;Acc:MGI:1927169]	4.93119	4.68263e-07	0.000123746	4.12076	16.1526
ENSMUSG00000024843	Chka	12024	choline kinase alpha [Source:MGI Symbol;Acc:MGI:107760]	7.42584	4.81737e-07	0.000123746	9.72097	56.8091
ENSMUSG00000015605	Srf	2893	serum response factor [Source:MGI Symbol;Acc:MGI:106658]	5.07439	4.85811e-07	0.000123746	6.20996	25.525
ENSMUSG00000008348	Ubc	2893	ubiquitin C [Source:MGI Symbol;Acc:MGI:98889]	2.87494	4.8865e-07	0.000123746	23.8955	55.2108
ENSMUSG00000000567	Sox9	4135	SRY (sex determining region Y)-box 9 [Source:MGI Symbol;Acc:MGI:98371]	6.70196	5.11149e-07	0.000127645	31.3943	171.899
ENSMUSG00000042622	Maff	2594	v-maf musculoaponeurotic fibrosarcoma oncogene family, protein F (avian) [Source:MGI Symbol;Acc:MGI:96910]	8.81895	5.32935e-07	0.000131263	12.5504	89.6381
ENSMUSG00000006301	Tmbim1	12659	transmembrane BAX inhibitor motif containing 1 [Source:MGI Symbol;Acc:MGI:1916910]	2.81174	5.42931e-07	0.000131918	2.80607	6.32219
ENSMUSG00000022114	Spry2	2087	sprouty RTK signaling antagonist 2 [Source:MGI Symbol;Acc:MGI:1345138]	3.91566	5.65342e-07	0.000134511	12.8751	40.9216
ENSMUSG00000014599	Csf1	5281	colony stimulating factor 1 (macrophage) [Source:MGI Symbol;Acc:MGI:1339753]	6.24815	5.7581e-07	0.000134511	4.32653	21.8779
ENSMUSG00000003752	Itpkc	5285	inositol 1,4,5-trisphosphate 3-kinase C [Source:MGI Symbol;Acc:MGI:2442554]	8.75622	5.81661e-07	0.000134511	2.29945	16.3303
ENSMUSG00000034595	Ppp1r18	4317	protein phosphatase 1, regulatory subunit 18 [Source:MGI Symbol;Acc:MGI:1923698]	4.30717	5.83531e-07	0.000134511	3.29706	11.6274
ENSMUSG00000025372	Baiap2	4992	brain-specific angiogenesis inhibitor 1-associated protein 2 [Source:MGI Symbol;Acc:MGI:2137336]	6.18813	6.28451e-07	0.000141268	2.92564	14.4179
ENSMUSG00000039384	Dusp10	3042	dual specificity phosphatase 10 [Source:MGI Symbol;Acc:MGI:1927070]	6.18048	6.29836e-07	0.000141268	3.26511	16.3311
ENSMUSG00000030259	Rassf8	5559	Ras association (RalGDS/AF-6) domain family (N-terminal) member 8 [Source:MGI Symbol;Acc:MGI:1918573]	3.00547	6.36413e-07	0.000141268	8.10173	19.7082
ENSMUSG00000018932	Map2k3	3314	mitogen-activated protein kinase kinase 3 [Source:MGI Symbol;Acc:MGI:1346868]	3.80364	6.56562e-07	0.000142977	12.1428	36.9411
ENSMUSG00000061589	Dot1l	8705	DOT1-like, histone H3 methyltransferase (S. cerevisiae) [Source:MGI Symbol;Acc:MGI:2143886]	4.44647	6.60015e-07	0.000142977	6.2754	22.0405
ENSMUSG00000032501	Trib1	6248	tribbles pseudokinase 1 [Source:MGI Symbol;Acc:MGI:2443397]	5.65724	7.05206e-07	0.000150948	17.1292	78.5018
ENSMUSG00000025283	Sat1	2774	spermidine/spermine N1-acetyl transferase 1 [Source:MGI Symbol;Acc:MGI:98233]	3.36459	7.19891e-07	0.000152278	9.62215	25.9398
ENSMUSG00000030172	Erc1	16271	ELKS/RAB6-interacting/CAST family member 1 [Source:MGI Symbol;Acc:MGI:2151013]	3.84063	7.3296e-07	0.0001532	7.84078	23.8379
ENSMUSG00000034006	Pqlc1	6105	PQ loop repeat containing 1 [Source:MGI Symbol;Acc:MGI:1914193]	3.46531	7.41289e-07	0.0001532	2.35716	6.51457
ENSMUSG00000019960	Dusp6	3132	dual specificity phosphatase 6 [Source:MGI Symbol;Acc:MGI:1914853]	3.58885	7.80052e-07	0.000157924	5.06323	14.5549
ENSMUSG00000074923	Pak6	5211	p21 (RAC1) activated kinase 6 [Source:MGI Symbol;Acc:MGI:2679420]	18.3262	7.81717e-07	0.000157924	0.155216	2.34186
ENSMUSG00000038894	Irs2	6323	insulin receptor substrate 2 [Source:MGI Symbol;Acc:MGI:109334]	4.50831	8.01098e-07	0.000160041	8.61285	31.0096
ENSMUSG00000031488	Rab11fip1	10800	RAB11 family interacting protein 1 (class I) [Source:MGI Symbol;Acc:MGI:1923017]	2.32942	8.14941e-07	0.000161018	13.9308	26.3056
ENSMUSG00000047604	Frat2	2161	frequently rearranged in advanced T cell lymphomas 2 [Source:MGI Symbol;Acc:MGI:2673967]	5.18439	8.65475e-07	0.000169144	5.94618	24.8801
ENSMUSG00000109864	Eid3	1305	EP300 interacting inhibitor of differentiation 3 [Source:MGI Symbol;Acc:MGI:1913591]	7.35587	9.12012e-07	0.000176322	3.22902	19.0429
ENSMUSG00000068699	Flnc	9402	filamin C, gamma [Source:MGI Symbol;Acc:MGI:95557]	12.8462	9.73156e-07	0.000184455	16.0033	162.951
ENSMUSG00000025959	Klf7	8131	Kruppel-like factor 7 (ubiquitous) [Source:MGI Symbol;Acc:MGI:1935151]	3.13327	9.74593e-07	0.000184455	3.45587	8.80178
ENSMUSG00000021823	Vcl	8191	vinculin [Source:MGI Symbol;Acc:MGI:98927]	3.68865	1.03143e-06	0.000193179	15.9866	47.5811
ENSMUSG00000016528	Mapkapk2	3041	MAP kinase-activated protein kinase 2 [Source:MGI Symbol;Acc:MGI:109298]	2.19022	1.04885e-06	0.000194416	27.4308	48.4998
ENSMUSG00000029313	Aff1	9458	AF4/FMR2 family, member 1 [Source:MGI Symbol;Acc:MGI:1100819]	2.96137	1.07185e-06	0.000196651	22.8558	54.8598
ENSMUSG00000027940	Tpm3	6085	tropomyosin 3, gamma [Source:MGI Symbol;Acc:MGI:1890149]	3.05352	1.15391e-06	0.00020957	19.3305	47.4921
ENSMUSG00000046711	Hmga1	2125	high mobility group AT-hook 1 [Source:MGI Symbol;Acc:MGI:96160]	3.54865	1.18708e-06	0.000213436	15.9695	45.9182
ENSMUSG00000019947	Arid5b	10060	AT rich interactive domain 5B (MRF1-like) [Source:MGI Symbol;Acc:MGI:2175912]	3.89429	1.3087e-06	0.000232974	19.6888	61.4622
ENSMUSG00000105504	Gbp5	6637	guanylate binding protein 5 [Source:MGI Symbol;Acc:MGI:2429943]	13.1752	1.32627e-06	0.000233788	0.0917419	0.982829
ENSMUSG00000003541	Ier3	1131	immediate early response 3 [Source:MGI Symbol;Acc:MGI:104814]	9.93695	1.34525e-06	0.000234832	3.45065	28.1713
ENSMUSG00000061132	Blnk	5991	B cell linker [Source:MGI Symbol;Acc:MGI:96878]	6.54638	1.4083e-06	0.000242248	0.523511	2.77352
ENSMUSG00000069833	Ahnak	19938	AHNAK nucleoprotein (desmoyokin) [Source:MGI Symbol;Acc:MGI:1316648]	3.7324	1.44664e-06	0.000242248	98.2683	294.93
ENSMUSG00000021360	Gcnt2	7051	glucosaminyl (N-acetyl) transferase 2, I-branching enzyme [Source:MGI Symbol;Acc:MGI:1100870]	11.4494	1.46292e-06	0.000242248	1.08864	10.006
ENSMUSG00000056501	Cebpb	1504	CCAAT/enhancer binding protein (C/EBP), beta [Source:MGI Symbol;Acc:MGI:88373]	3.39325	1.46596e-06	0.000242248	30.831	84.0779
ENSMUSG00000028613	Lrp8	12689	low density lipoprotein receptor-related protein 8, apolipoprotein e receptor [Source:MGI Symbol;Acc:MGI:1340044]	3.28047	1.46942e-06	0.000242248	2.01482	5.29846
ENSMUSG00000004040	Stat3	9527	signal transducer and activator of transcription 3 [Source:MGI Symbol;Acc:MGI:103038]	2.38788	1.47451e-06	0.000242248	13.5157	25.9258
ENSMUSG00000047281	Sfn	1613	stratifin [Source:MGI Symbol;Acc:MGI:1891831]	4.83797	1.48205e-06	0.000242248	5.07325	19.9233
ENSMUSG00000046731	Kctd11	3146	potassium channel tetramerisation domain containing 11 [Source:MGI Symbol;Acc:MGI:2448712]	6.0334	1.54249e-06	0.000248779	1.50366	7.20127
ENSMUSG00000032846	Zswim6	5550	zinc finger SWIM-type containing 6 [Source:MGI Symbol;Acc:MGI:1914513]	2.89667	1.54968e-06	0.000248779	7.49731	17.3916
ENSMUSG00000025178	Pi4k2a	6692	phosphatidylinositol 4-kinase type 2 alpha [Source:MGI Symbol;Acc:MGI:1934031]	2.65069	1.57253e-06	0.000250213	7.34568	15.5549
ENSMUSG00000044471	Lncpint	7378	long non-protein coding RNA, Trp53 induced transcript [Source:MGI Symbol;Acc:MGI:2673128]	3.98479	1.61371e-06	0.000254513	7.15929	22.7303
ENSMUSG00000048895	Cdk5r1	4162	cyclin-dependent kinase 5, regulatory subunit 1 (p35) [Source:MGI Symbol;Acc:MGI:101764]	4.76355	1.63654e-06	0.000255869	1.26735	4.88025
ENSMUSG00000005871	Apc	16116	APC, WNT signaling pathway regulator [Source:MGI Symbol;Acc:MGI:88039]	2.24853	1.65962e-06	0.000257242	15.2564	27.4936
ENSMUSG00000036390	Gadd45a	1764	growth arrest and DNA-damage-inducible 45 alpha [Source:MGI Symbol;Acc:MGI:107799]	4.23379	1.69541e-06	0.000260542	12.1652	41.393
ENSMUSG00000031538	Plat	6241	plasminogen activator, tissue [Source:MGI Symbol;Acc:MGI:97610]	4.41692	1.74014e-06	0.00026495	9.91605	35.5654
ENSMUSG00000030064	Frmd4b	14302	FERM domain containing 4B [Source:MGI Symbol;Acc:MGI:2141794]	2.6783	1.75356e-06	0.00026495	4.89444	10.4732
ENSMUSG00000034220	Gpc1	5159	glypican 1 [Source:MGI Symbol;Acc:MGI:1194891]	2.99603	1.77298e-06	0.000265652	10.5655	25.1088
ENSMUSG00000039911	Spsb1	4396	splA/ryanodine receptor domain and SOCS box containing 1 [Source:MGI Symbol;Acc:MGI:1921896]	4.02561	1.82858e-06	0.000271718	8.11475	26.123
ENSMUSG00000020275	Rel	7466	reticuloendotheliosis oncogene [Source:MGI Symbol;Acc:MGI:97897]	4.82341	2.06653e-06	0.000304559	1.4786	5.81148
ENSMUSG00000047554	Tmem41b	5872	transmembrane protein 41B [Source:MGI Symbol;Acc:MGI:1289225]	2.87944	2.14615e-06	0.000313722	2.7444	6.32346
ENSMUSG00000004043	Stat5a	7133	signal transducer and activator of transcription 5A [Source:MGI Symbol;Acc:MGI:103036]	3.67514	2.17105e-06	0.000314803	1.40599	4.20313
ENSMUSG00000021411	Pxdc1	2914	PX domain containing 1 [Source:MGI Symbol;Acc:MGI:1914145]	6.26342	2.26695e-06	0.000326078	1.59035	8.03862
ENSMUSG00000053907	Mat2a	4486	methionine adenosyltransferase II, alpha [Source:MGI Symbol;Acc:MGI:2443731]	2.34156	2.41396e-06	0.000344469	23.9974	45.0081
ENSMUSG00000048490	Nrip1	11457	nuclear receptor interacting protein 1 [Source:MGI Symbol;Acc:MGI:1315213]	2.08376	2.54309e-06	0.000359485	7.03164	11.8524
ENSMUSG00000035969	Rusc2	7923	RUN and SH3 domain containing 2 [Source:MGI Symbol;Acc:MGI:2140371]	3.07255	2.55918e-06	0.000359485	4.43113	11.0574
ENSMUSG00000056749	Nfil3	2026	nuclear factor, interleukin 3, regulated [Source:MGI Symbol;Acc:MGI:109495]	3.21537	2.59351e-06	0.000361484	15.1373	39.3439
ENSMUSG00000021701	Plk2	4491	polo like kinase 2 [Source:MGI Symbol;Acc:MGI:1099790]	8.67854	2.66345e-06	0.000366114	6.01823	42.2988
ENSMUSG00000040661	Rad54l2	11828	RAD54 like 2 (S. cerevisiae) [Source:MGI Symbol;Acc:MGI:1933196]	2.11292	2.66746e-06	0.000366114	4.35319	7.38017
ENSMUSG00000041229	Phf8	9318	PHD finger protein 8 [Source:MGI Symbol;Acc:MGI:2444341]	2.39062	2.74512e-06	0.000373919	2.48296	4.77328
ENSMUSG00000042677	Zc3h12a	2882	zinc finger CCCH type containing 12A [Source:MGI Symbol;Acc:MGI:2385891]	7.99998	2.92647e-06	0.000393934	0.726765	4.71912
ENSMUSG00000021408	Ripk1	8344	receptor (TNFRSF)-interacting serine-threonine kinase 1 [Source:MGI Symbol;Acc:MGI:108212]	3.33494	2.93588e-06	0.000393934	3.35968	8.93825
ENSMUSG00000024812	Tjp2	6199	tight junction protein 2 [Source:MGI Symbol;Acc:MGI:1341872]	2.18423	2.98442e-06	0.000396067	18.681	32.758
ENSMUSG00000050359	Sprr1a	806	small proline-rich protein 1A [Source:MGI Symbol;Acc:MGI:106660]	5.1175	2.99583e-06	0.000396067	1.90653	7.94098
ENSMUSG00000045761	Togaram2	5624	TOG array regulator of axonemal microtubules 2 [Source:MGI Symbol;Acc:MGI:2443498]	9.58526	3.03557e-06	0.000397337	0.306899	2.33125
ENSMUSG00000039232	Stx11	4209	syntaxin 11 [Source:MGI Symbol;Acc:MGI:1921982]	6.3885	3.04964e-06	0.000397337	5.38309	27.7732
ENSMUSG00000025234	Arih1	7707	ariadne RBR E3 ubiquitin protein ligase 1 [Source:MGI Symbol;Acc:MGI:1344363]	2.1876	3.09324e-06	0.00039751	9.50767	16.6886
ENSMUSG00000041308	Sntb2	10350	syntrophin, basic 2 [Source:MGI Symbol;Acc:MGI:101771]	3.3245	3.09518e-06	0.00039751	5.7292	15.4594
ENSMUSG00000028680	Plk3	2531	polo like kinase 3 [Source:MGI Symbol;Acc:MGI:109604]	13.9419	3.17008e-06	0.000404241	1.08978	12.4447
ENSMUSG00000046062	Ppp1r15b	5594	protein phosphatase 1, regulatory subunit 15B [Source:MGI Symbol;Acc:MGI:2444211]	2.31298	3.34864e-06	0.000424004	9.01161	16.8063
ENSMUSG00000041235	Chd7	13786	chromodomain helicase DNA binding protein 7 [Source:MGI Symbol;Acc:MGI:2444748]	2.08773	3.40743e-06	0.000428431	22.9672	38.4319
ENSMUSG00000020363	Gfpt2	5591	glutamine fructose-6-phosphate transaminase 2 [Source:MGI Symbol;Acc:MGI:1338883]	5.03924	3.59902e-06	0.000449378	1.57049	6.44852
ENSMUSG00000046404	Yod1	6128	YOD1 deubiquitinase [Source:MGI Symbol;Acc:MGI:2442596]	3.1998	3.82911e-06	0.00047481	3.02523	7.93926
ENSMUSG00000035498	Cdcp1	6765	CUB domain containing protein 1 [Source:MGI Symbol;Acc:MGI:2442010]	45.07	3.91108e-06	0.000481653	0.0156854	0.613217
ENSMUSG00000025340	Rabgef1	4168	RAB guanine nucleotide exchange factor (GEF) 1 [Source:MGI Symbol;Acc:MGI:1929459]	2.91462	4.08488e-06	0.000499634	6.87711	16.1435
ENSMUSG00000052512	Nav2	32228	neuron navigator 2 [Source:MGI Symbol;Acc:MGI:2183691]	2.85856	4.18435e-06	0.000508342	3.05622	6.95682
ENSMUSG00000027947	Il6ra	8642	interleukin 6 receptor, alpha [Source:MGI Symbol;Acc:MGI:105304]	7.89543	4.36928e-06	0.000527246	0.192297	1.23824
ENSMUSG00000020607	Lratd1	4308	LRAT domain containing 1 [Source:MGI Symbol;Acc:MGI:2145011]	4.11377	4.40379e-06	0.000527867	0.331989	1.11267
ENSMUSG00000040033	Stat2	5926	signal transducer and activator of transcription 2 [Source:MGI Symbol;Acc:MGI:103039]	3.26972	4.46917e-06	0.000531613	2.53237	6.57459
ENSMUSG00000026020	Nop58	10758	NOP58 ribonucleoprotein [Source:MGI Symbol;Acc:MGI:1933184]	2.5262	4.49417e-06	0.000531613	4.1469	8.44247
ENSMUSG00000038564	Ift172	6617	intraflagellar transport 172 [Source:MGI Symbol;Acc:MGI:2682064]	2.30858	4.67031e-06	0.000548838	7.25962	13.4512
ENSMUSG00000002489	Tiam1	10048	T cell lymphoma invasion and metastasis 1 [Source:MGI Symbol;Acc:MGI:103306]	3.1173	4.9416e-06	0.000576064	2.68156	6.61589
ENSMUSG00000087006	Gm13889	1392	predicted gene 13889 [Source:MGI Symbol;Acc:MGI:3652053]	9.20884	4.96606e-06	0.000576064	2.76428	21.2639
ENSMUSG00000039770	Ypel5	4185	yippee like 5 [Source:MGI Symbol;Acc:MGI:1916937]	2.10916	5.04123e-06	0.000581034	11.2697	19.2318
ENSMUSG00000034936	Arl4d	1382	ADP-ribosylation factor-like 4D [Source:MGI Symbol;Acc:MGI:1933155]	6.72392	5.2079e-06	0.000595232	12.4995	68.0971
ENSMUSG00000026796	Fam129b	4672	family with sequence similarity 129, member B [Source:MGI Symbol;Acc:MGI:2442910]	2.07555	5.23062e-06	0.000595232	23.9178	40.0131
ENSMUSG00000019854	Reps1	5564	RalBP1 associated Eps domain containing protein [Source:MGI Symbol;Acc:MGI:1196373]	2.94194	5.34265e-06	0.000604157	4.64365	11.0268
ENSMUSG00000018143	Mafk	3901	v-maf musculoaponeurotic fibrosarcoma oncogene family, protein K (avian) [Source:MGI Symbol;Acc:MGI:99951]	2.90254	5.38562e-06	0.000605209	7.14638	16.6686
ENSMUSG00000032802	Srxn1	2820	sulfiredoxin 1 homolog (S. cerevisiae) [Source:MGI Symbol;Acc:MGI:104971]	11.6027	5.44018e-06	0.000607543	19.785	186.01
ENSMUSG00000025582	Nptx1	5217	neuronal pentraxin 1 [Source:MGI Symbol;Acc:MGI:107811]	5.5769	5.55556e-06	0.000616598	1.1168	4.97112
ENSMUSG00000106149	Gm43430	3897	predicted gene 43430 [Source:MGI Symbol;Acc:MGI:5663567]	5.49099	5.87623e-06	0.000648188	0.614221	2.7529
ENSMUSG00000038587	Akap12	6461	A kinase (PRKA) anchor protein (gravin) 12 [Source:MGI Symbol;Acc:MGI:1932576]	10.4664	5.95822e-06	0.000653224	7.34944	62.3057
ENSMUSG00000034832	Tet3	16695	tet methylcytosine dioxygenase 3 [Source:MGI Symbol;Acc:MGI:2446229]	2.32598	6.18723e-06	0.000673189	13.0539	24.2876
ENSMUSG00000035274	Tpbg	3828	trophoblast glycoprotein [Source:MGI Symbol;Acc:MGI:1341264]	5.07724	6.2152e-06	0.000673189	2.86781	11.7443
ENSMUSG00000029171	Pgm2	2590	phosphoglucomutase 2 [Source:MGI Symbol;Acc:MGI:97564]	2.44515	6.81932e-06	0.000731949	6.71714	13.2527
ENSMUSG00000090946	Ccdc71l	4240	coiled-coil domain containing 71 like [Source:MGI Symbol;Acc:MGI:1919373]	2.96171	6.83912e-06	0.000731949	4.25526	10.214
ENSMUSG00000028195	Ccn1	2019	cellular communication network factor 1 [Source:MGI Symbol;Acc:MGI:88613]	9.79227	6.99038e-06	0.000739336	49.5944	393.253
ENSMUSG00000038650	Rnh1	2594	ribonuclease/angiogenin inhibitor 1 [Source:MGI Symbol;Acc:MGI:1195456]	2.48861	7.25477e-06	0.000762811	8.79677	17.653
ENSMUSG00000040511	Pvr	6122	poliovirus receptor [Source:MGI Symbol;Acc:MGI:107741]	6.29595	7.4004e-06	0.000769911	1.253	6.30916
ENSMUSG00000027459	Fam110a	2207	family with sequence similarity 110, member A [Source:MGI Symbol;Acc:MGI:1921097]	5.30931	7.40793e-06	0.000769911	1.44707	6.38657
ENSMUSG00000030790	Adm	1619	adrenomedullin [Source:MGI Symbol;Acc:MGI:108058]	9.68103	7.48778e-06	0.000773737	2.49885	19.9374
ENSMUSG00000046186	Cd109	6900	CD109 antigen [Source:MGI Symbol;Acc:MGI:2445221]	7.70211	7.61732e-06	0.000780681	0.42529	2.67583
ENSMUSG00000054720	Lrrc8c	7654	leucine rich repeat containing 8 family, member C [Source:MGI Symbol;Acc:MGI:2140839]	6.04981	7.90734e-06	0.000803243	0.245767	1.20643
ENSMUSG00000030522	Mtmr10	7873	myotubularin related protein 10 [Source:MGI Symbol;Acc:MGI:2142292]	2.69825	8.15256e-06	0.0008235	9.20216	19.8615
ENSMUSG00000032776	Mctp2	12351	multiple C2 domains, transmembrane 2 [Source:MGI Symbol;Acc:MGI:2685335]	7.35045	8.51599e-06	0.000850653	0.130991	0.771301
ENSMUSG00000020611	Gna13	6421	guanine nucleotide binding protein, alpha 13 [Source:MGI Symbol;Acc:MGI:95768]	2.11169	8.61204e-06	0.000854083	15.9206	27.1302
ENSMUSG00000028530	Jak1	7227	Janus kinase 1 [Source:MGI Symbol;Acc:MGI:96628]	2.03178	8.64534e-06	0.000854083	18.8098	30.7607
ENSMUSG00000020181	Nav3	16536	neuron navigator 3 [Source:MGI Symbol;Acc:MGI:2183703]	3.63546	8.75283e-06	0.000859978	0.652788	1.89671
ENSMUSG00000019966	Kitl	5911	kit ligand [Source:MGI Symbol;Acc:MGI:96974]	6.59258	9.33939e-06	0.00091262	0.390949	2.04567
ENSMUSG00000103899	Gm37940	3251	predicted gene, 37940 [Source:MGI Symbol;Acc:MGI:5611168]	6.19762	9.44316e-06	0.000915604	0.441323	2.19788
ENSMUSG00000051391	Ywhag	5500	tyrosine 3-monooxygenase/tryptophan 5-monooxygenase activation protein, gamma polypeptide [Source:MGI Symbol;Acc:MGI:108109]	2.17813	9.47177e-06	0.000915604	38.477	67.6671
ENSMUSG00000026317	Cln8	7606	ceroid-lipofuscinosis, neuronal 8 [Source:MGI Symbol;Acc:MGI:1349447]	2.52846	9.69716e-06	0.000932379	3.4359	7.05395
ENSMUSG00000036057	Ptpn23	5619	protein tyrosine phosphatase, non-receptor type 23 [Source:MGI Symbol;Acc:MGI:2144837]	2.21054	1.01397e-05	0.000967249	15.0802	26.7004
ENSMUSG00000033902	Mapkbp1	7602	mitogen-activated protein kinase binding protein 1 [Source:MGI Symbol;Acc:MGI:1347004]	2.48473	1.01674e-05	0.000967249	3.61287	7.13718
ENSMUSG00000051022	Hs3st1	2230	heparan sulfate (glucosamine) 3-O-sulfotransferase 1 [Source:MGI Symbol;Acc:MGI:1201606]	6.44355	1.05294e-05	0.000987541	2.1306	11.111
ENSMUSG00000025145	Lrrc45	3293	leucine rich repeat containing 45 [Source:MGI Symbol;Acc:MGI:2387183]	2.60589	1.05721e-05	0.000987541	9.00786	18.7098
ENSMUSG00000097998	Gm27019	404	predicted gene, 27019 [Source:MGI Symbol;Acc:MGI:5504134]	9.34253	1.06513e-05	0.000987541	3.94475	29.5842
ENSMUSG00000045092	S1pr1	3046	sphingosine-1-phosphate receptor 1 [Source:MGI Symbol;Acc:MGI:1096355]	2.92315	1.0653e-05	0.000987541	3.60012	8.36122
ENSMUSG00000015501	Hivep2	13720	human immunodeficiency virus type I enhancer binding protein 2 [Source:MGI Symbol;Acc:MGI:1338076]	2.35767	1.06553e-05	0.000987541	3.21857	6.11893
ENSMUSG00000008384	Sertad1	1344	SERTA domain containing 1 [Source:MGI Symbol;Acc:MGI:1913438]	3.71579	1.09334e-05	0.00100811	6.53196	19.5476
ENSMUSG00000038059	Smim3	6828	small integral membrane protein 3 [Source:MGI Symbol;Acc:MGI:1917088]	3.39401	1.10253e-05	0.0010114	4.39946	12.182
ENSMUSG00000038456	Dennd2a	7229	DENN/MADD domain containing 2A [Source:MGI Symbol;Acc:MGI:2444961]	2.23193	1.12161e-05	0.00102368	6.08117	10.9196
ENSMUSG00000029381	Shroom3	13247	shroom family member 3 [Source:MGI Symbol;Acc:MGI:1351655]	2.18548	1.18011e-05	0.00107163	3.64017	6.42572
ENSMUSG00000020901	Pik3r5	5550	phosphoinositide-3-kinase regulatory subunit 5 [Source:MGI Symbol;Acc:MGI:2443588]	11.5982	1.20012e-05	0.00108433	0.0273172	0.271873
ENSMUSG00000056656	Apol8	2962	apolipoprotein L 8 [Source:MGI Symbol;Acc:MGI:2444921]	14.6101	1.23528e-05	0.00111051	0.336925	3.99446
ENSMUSG00000055148	Klf2	1847	Kruppel-like factor 2 (lung) [Source:MGI Symbol;Acc:MGI:1342772]	30.5998	1.24618e-05	0.00111474	1.1426	28.1734
ENSMUSG00000048787	Dcun1d3	7838	DCN1, defective in cullin neddylation 1, domain containing 3 (S. cerevisiae) [Source:MGI Symbol;Acc:MGI:2679003]	2.59854	1.29066e-05	0.00114337	1.76662	3.66216
ENSMUSG00000017009	Sdc4	2547	syndecan 4 [Source:MGI Symbol;Acc:MGI:1349164]	2.32484	1.2909e-05	0.00114337	155.062	289.51
ENSMUSG00000038806	Sde2	3471	SDE2 telomere maintenance homolog (S. pombe) [Source:MGI Symbol;Acc:MGI:2384788]	2.16479	1.29762e-05	0.00114369	6.33724	11.0729
ENSMUSG00000022895	Ets2	5780	E26 avian leukemia oncogene 2, 3' domain [Source:MGI Symbol;Acc:MGI:95456]	3.7459	1.31396e-05	0.00115244	5.29459	16.0399
ENSMUSG00000071604	Fam189a2	2886	family with sequence similarity 189, member A2 [Source:MGI Symbol;Acc:MGI:2685813]	9.06937	1.33973e-05	0.00116934	2.47755	17.9084
ENSMUSG00000018427	Ypel2	4847	yippee like 2 [Source:MGI Symbol;Acc:MGI:1925114]	2.25907	1.40057e-05	0.00121653	12.398	22.3451
ENSMUSG00000078853	Igtp	2022	interferon gamma induced GTPase [Source:MGI Symbol;Acc:MGI:107729]	8.44996	1.41831e-05	0.00122602	1.46625	9.97438
ENSMUSG00000057561	Eif1a	4168	eukaryotic translation initiation factor 1A [Source:MGI Symbol;Acc:MGI:95298]	2.52035	1.43206e-05	0.00123199	5.64943	11.5306
ENSMUSG00000020892	Aloxe3	6397	arachidonate lipoxygenase 3 [Source:MGI Symbol;Acc:MGI:1345140]	17.0463	1.44293e-05	0.00123204	0.0928489	1.26511
ENSMUSG00000027936	Crtc2	4094	CREB regulated transcription coactivator 2 [Source:MGI Symbol;Acc:MGI:1921593]	2.25907	1.44583e-05	0.00123204	4.47311	8.11352
ENSMUSG00000022305	Lrp12	4588	low density lipoprotein-related protein 12 [Source:MGI Symbol;Acc:MGI:2443132]	2.0243	1.46709e-05	0.00124426	8.47176	13.8051
ENSMUSG00000035673	Sbno2	10715	strawberry notch 2 [Source:MGI Symbol;Acc:MGI:2448490]	10.2291	1.49093e-05	0.00125854	8.5232	69.374
ENSMUSG00000034663	Bmp2k	8480	BMP2 inducible kinase [Source:MGI Symbol;Acc:MGI:2155456]	2.17186	1.5112e-05	0.00126969	6.4112	11.1646
ENSMUSG00000032193	Ldlr	9622	low density lipoprotein receptor [Source:MGI Symbol;Acc:MGI:96765]	3.84018	1.52156e-05	0.00127245	6.12469	18.6236
ENSMUSG00000021458	Aopep	11294	aminopeptidase O [Source:MGI Symbol;Acc:MGI:1919311]	2.8869	1.57526e-05	0.0013044	3.01202	6.8927
ENSMUSG00000026749	Nek6	10714	NIMA (never in mitosis gene a)-related expressed kinase 6 [Source:MGI Symbol;Acc:MGI:1891638]	2.32453	1.58152e-05	0.0013044	2.85286	5.33709
ENSMUSG00000037411	Serpine1	3876	serine (or cysteine) peptidase inhibitor, clade E, member 1 [Source:MGI Symbol;Acc:MGI:97608]	24.0768	1.6347e-05	0.00134209	7.77735	155.016
ENSMUSG00000033854	Kcnk10	8774	potassium channel, subfamily K, member 10 [Source:MGI Symbol;Acc:MGI:1919508]	35.3466	1.67426e-05	0.00136628	0.0472919	1.36178
ENSMUSG00000023905	Tnfrsf12a	1932	tumor necrosis factor receptor superfamily, member 12a [Source:MGI Symbol;Acc:MGI:1351484]	4.03697	1.67935e-05	0.00136628	13.4031	43.5578
ENSMUSG00000047648	Fbxo30	5197	F-box protein 30 [Source:MGI Symbol;Acc:MGI:1919115]	2.02204	1.71974e-05	0.00139063	6.98341	11.3573
ENSMUSG00000025225	Nfkb2	4584	nuclear factor of kappa light polypeptide gene enhancer in B cells 2, p49/p100 [Source:MGI Symbol;Acc:MGI:1099800]	4.4236	1.72475e-05	0.00139063	4.94189	17.5146
ENSMUSG00000070462	Tlnrd1	4433	talin rod domain containing 1 [Source:MGI Symbol;Acc:MGI:1891420]	3.07482	1.73812e-05	0.00139515	3.31152	8.18031
ENSMUSG00000024772	Ehd1	3705	EH-domain containing 1 [Source:MGI Symbol;Acc:MGI:1341878]	2.26553	1.75851e-05	0.00140525	18.3989	33.7712
ENSMUSG00000046230	Vps13a	17801	vacuolar protein sorting 13A [Source:MGI Symbol;Acc:MGI:2444304]	2.13441	1.76708e-05	0.00140585	3.90781	6.7139
ENSMUSG00000034394	Lif	4350	leukemia inhibitory factor [Source:MGI Symbol;Acc:MGI:96787]	26.3951	1.78552e-05	0.00141426	1.50147	33.0991
ENSMUSG00000014444	Piezo1	9935	piezo-type mechanosensitive ion channel component 1 [Source:MGI Symbol;Acc:MGI:3603204]	2.01862	1.80431e-05	0.00142287	21.4399	34.6459
ENSMUSG00000018900	Slc22a5	3071	solute carrier family 22 (organic cation transporter), member 5 [Source:MGI Symbol;Acc:MGI:1329012]	2.37709	1.86424e-05	0.00145735	4.75077	9.03569
ENSMUSG00000042377	Fam83g	6659	family with sequence similarity 83, member G [Source:MGI Symbol;Acc:MGI:1916890]	12.5953	1.94091e-05	0.00151072	0.800711	8.26163
ENSMUSG00000019558	Slc6a8	5210	solute carrier family 6 (neurotransmitter transporter, creatine), member 8 [Source:MGI Symbol;Acc:MGI:2147834]	3.38454	1.99263e-05	0.00154429	2.252	6.23718
ENSMUSG00000097282	5031415H12Rik	2481	RIKEN cDNA 5031415H12 gene [Source:MGI Symbol;Acc:MGI:1923234]	7.09431	2.03262e-05	0.00155543	0.401094	2.32707
ENSMUSG00000028793	Rnf19b	2872	ring finger protein 19B [Source:MGI Symbol;Acc:MGI:1922484]	3.69021	2.03297e-05	0.00155543	19.8073	58.9619
ENSMUSG00000037999	Arap2	12451	ArfGAP with RhoGAP domain, ankyrin repeat and PH domain 2 [Source:MGI Symbol;Acc:MGI:2684416]	2.20473	2.08935e-05	0.00158509	2.85414	5.01881
ENSMUSG00000061175	Fnip2	8364	folliculin interacting protein 2 [Source:MGI Symbol;Acc:MGI:2683054]	2.49541	2.11217e-05	0.00159567	3.94859	7.98131
ENSMUSG00000037553	Zdhhc18	5382	zinc finger, DHHC domain containing 18 [Source:MGI Symbol;Acc:MGI:3527792]	3.34795	2.15059e-05	0.00159808	4.63716	12.373
ENSMUSG00000023087	Noct	10658	nocturnin [Source:MGI Symbol;Acc:MGI:109382]	7.35722	2.1538e-05	0.00159808	3.77241	22.624
ENSMUSG00000044707	Ccnjl	2781	cyclin J-like [Source:MGI Symbol;Acc:MGI:2685723]	-2.28568	2.156e-05	0.00159808	17.7023	6.23829
ENSMUSG00000104571	Gm43010	2878	predicted gene 43010 [Source:MGI Symbol;Acc:MGI:5663147]	3.54716	2.17056e-05	0.00159808	1.20088	3.43182
ENSMUSG00000044968	Napepld	3956	N-acyl phosphatidylethanolamine phospholipase D [Source:MGI Symbol;Acc:MGI:2140885]	-2.55189	2.17308e-05	0.00159808	6.10696	1.92794
ENSMUSG00000031880	Rrad	1577	Ras-related associated with diabetes [Source:MGI Symbol;Acc:MGI:1930943]	9.605	2.18057e-05	0.00159808	0.664997	5.087
ENSMUSG00000033016	Nfatc1	7469	nuclear factor of activated T cells, cytoplasmic, calcineurin dependent 1 [Source:MGI Symbol;Acc:MGI:102469]	7.32917	2.18289e-05	0.00159808	0.886	5.16536
ENSMUSG00000033107	Rnf125	1677	ring finger protein 125 [Source:MGI Symbol;Acc:MGI:1914914]	27.6542	2.18648e-05	0.00159808	0.18006	4.17445
ENSMUSG00000061815	Rufy4	2329	RUN and FYVE domain containing 4 [Source:MGI Symbol;Acc:MGI:3588214]	6.02225	2.24259e-05	0.00163246	0.463973	2.25319
ENSMUSG00000051439	Cd14	1732	CD14 antigen [Source:MGI Symbol;Acc:MGI:88318]	15.0637	2.36272e-05	0.00171151	0.623556	7.79289
ENSMUSG00000021891	Mettl6	7752	methyltransferase like 6 [Source:MGI Symbol;Acc:MGI:1914261]	2.38932	2.38378e-05	0.00171151	2.93996	5.61098
ENSMUSG00000020334	Slc22a4	2553	solute carrier family 22 (organic cation transporter), member 4 [Source:MGI Symbol;Acc:MGI:1353479]	3.83671	2.39077e-05	0.00171151	3.05516	9.50539
ENSMUSG00000029379	Cxcl3	3498	chemokine (C-X-C motif) ligand 3 [Source:MGI Symbol;Acc:MGI:3037818]	196.727	2.39539e-05	0.00171151	0	0.283937
ENSMUSG00000039239	Tgfb2	5791	transforming growth factor, beta 2 [Source:MGI Symbol;Acc:MGI:98726]	2.1188	2.39878e-05	0.00171151	91.6271	155.905
ENSMUSG00000114996	Gm48958	2964	predicted gene, 48958 [Source:MGI Symbol;Acc:MGI:6118289]	4.84562	2.41536e-05	0.00171653	2.39848	9.29547
ENSMUSG00000021453	Gadd45g	1173	growth arrest and DNA-damage-inducible 45 gamma [Source:MGI Symbol;Acc:MGI:1346325]	7.32018	2.48305e-05	0.00175769	25.7731	149.082
ENSMUSG00000039985	Sinhcaf	4138	SIN3-HDAC complex associated factor [Source:MGI Symbol;Acc:MGI:1929091]	-2.1322	2.51196e-05	0.00176736	13.5046	5.13313
ENSMUSG00000023067	Cdkn1a	3553	cyclin-dependent kinase inhibitor 1A (P21) [Source:MGI Symbol;Acc:MGI:104556]	5.92366	2.51637e-05	0.00176736	1.65734	7.97139
ENSMUSG00000003762	Coq8b	5586	coenzyme Q8B [Source:MGI Symbol;Acc:MGI:1924139]	3.21734	2.57423e-05	0.00179398	1.40171	3.64348
ENSMUSG00000059991	Nptx2	2536	neuronal pentraxin 2 [Source:MGI Symbol;Acc:MGI:1858209]	7.39	2.68397e-05	0.00186324	0.830727	4.97257
ENSMUSG00000047407	Tgif1	5625	TGFB-induced factor homeobox 1 [Source:MGI Symbol;Acc:MGI:1194497]	2.81184	2.71639e-05	0.00187692	9.22306	20.7967
ENSMUSG00000024990	Rbp4	1343	retinol binding protein 4, plasma [Source:MGI Symbol;Acc:MGI:97879]	16.6961	2.7277e-05	0.00187692	0.190433	2.62003
ENSMUSG00000021508	Cxcl14	1827	chemokine (C-X-C motif) ligand 14 [Source:MGI Symbol;Acc:MGI:1888514]	2.40704	2.73499e-05	0.00187692	22.5162	43.1511
ENSMUSG00000030166	Rad52	5752	RAD52 homolog, DNA repair protein [Source:MGI Symbol;Acc:MGI:101949]	10.9769	2.76172e-05	0.00187975	1.28394	10.9833
ENSMUSG00000075012	Fjx1	3134	four jointed box 1 [Source:MGI Symbol;Acc:MGI:1341907]	2.54794	2.76571e-05	0.00187975	4.80545	10.0154
ENSMUSG00000024042	Sik1	5133	salt inducible kinase 1 [Source:MGI Symbol;Acc:MGI:104754]	3.0953	2.78397e-05	0.00187975	12.3411	30.9423
ENSMUSG00000037465	Klf10	4179	Kruppel-like factor 10 [Source:MGI Symbol;Acc:MGI:1101353]	3.16622	2.79139e-05	0.00187975	4.5818	11.8066
ENSMUSG00000054855	Rnd1	2967	Rho family GTPase 1 [Source:MGI Symbol;Acc:MGI:2444878]	12.1666	2.81992e-05	0.00188622	1.52504	15.0957
ENSMUSG00000005103	Wdr1	8899	WD repeat domain 1 [Source:MGI Symbol;Acc:MGI:1337100]	2.4283	2.82198e-05	0.00188622	23.9311	46.6162
ENSMUSG00000022637	Cblb	10475	Casitas B-lineage lymphoma b [Source:MGI Symbol;Acc:MGI:2146430]	2.31534	2.84903e-05	0.00189416	2.8258	5.25014
ENSMUSG00000001053	N4bp3	2728	NEDD4 binding protein 3 [Source:MGI Symbol;Acc:MGI:2442218]	4.1369	2.85494e-05	0.00189416	1.03698	3.48062
ENSMUSG00000026923	Notch1	14232	notch 1 [Source:MGI Symbol;Acc:MGI:97363]	2.41167	2.90653e-05	0.00192015	8.74805	16.8018
ENSMUSG00000022744	Cldnd1	2563	claudin domain containing 1 [Source:MGI Symbol;Acc:MGI:2447860]	2.23971	2.91547e-05	0.00192015	7.50337	13.4764
ENSMUSG00000027894	Slc6a17	10283	solute carrier family 6 (neurotransmitter transporter), member 17 [Source:MGI Symbol;Acc:MGI:2442535]	2.54597	2.95459e-05	0.00193881	5.49142	11.2617
ENSMUSG00000034765	Dusp5	2473	dual specificity phosphatase 5 [Source:MGI Symbol;Acc:MGI:2685183]	8.67547	3.12271e-05	0.00203165	22.8116	161.272
ENSMUSG00000021752	Kctd6	3257	potassium channel tetramerisation domain containing 6 [Source:MGI Symbol;Acc:MGI:1918643]	-2.27852	3.13151e-05	0.00203165	9.22378	3.26174
ENSMUSG00000026305	Lrrfip1	6469	leucine rich repeat (in FLII) interacting protein 1 [Source:MGI Symbol;Acc:MGI:1342770]	3.22353	3.15255e-05	0.00203165	14.2361	36.4779
ENSMUSG00000061878	Sphk1	4774	sphingosine kinase 1 [Source:MGI Symbol;Acc:MGI:1316649]	10.6175	3.19401e-05	0.00205101	0.885353	7.62266
ENSMUSG00000030847	Bag3	2562	BCL2-associated athanogene 3 [Source:MGI Symbol;Acc:MGI:1352493]	3.19888	3.22777e-05	0.00206531	29.4334	76.3508
ENSMUSG00000019487	Trip10	3180	thyroid hormone receptor interactor 10 [Source:MGI Symbol;Acc:MGI:2146901]	2.03703	3.26132e-05	0.00207938	9.01816	14.8604
ENSMUSG00000099931	Gm29358	3265	predicted gene 29358 [Source:MGI Symbol;Acc:MGI:5580064]	3.60267	3.27328e-05	0.00207963	1.88926	5.49789
ENSMUSG00000020644	Id2	2438	inhibitor of DNA binding 2 [Source:MGI Symbol;Acc:MGI:96397]	2.23658	3.41679e-05	0.00214804	19.8964	35.8175
ENSMUSG00000021400	Wrnip1	4378	Werner helicase interacting protein 1 [Source:MGI Symbol;Acc:MGI:1926153]	2.03572	3.62648e-05	0.00227192	6.76114	11.0082
ENSMUSG00000109051	Gm44913	2990	predicted gene 44913 [Source:MGI Symbol;Acc:MGI:5753489]	13.895	3.66036e-05	0.00228518	0.334146	3.76313
ENSMUSG00000024235	Map3k8	4504	mitogen-activated protein kinase kinase kinase 8 [Source:MGI Symbol;Acc:MGI:1346878]	3.29274	3.70247e-05	0.00230347	2.67879	7.15655
ENSMUSG00000117284	Gm7072	3474	predicted gene 7072 [Source:MGI Symbol;Acc:MGI:3648314]	-3.24635	3.80376e-05	0.00235833	3.73951	0.925766
ENSMUSG00000105265	Sox2ot	11594	SOX2 overlapping transcript (non-protein coding) [Source:MGI Symbol;Acc:MGI:2444112]	-2.65189	3.84806e-05	0.0023776	18.7807	5.78975
ENSMUSG00000032244	Fem1b	6785	feminization 1 homolog b (C. elegans) [Source:MGI Symbol;Acc:MGI:1335087]	2.29391	3.91256e-05	0.00239849	10.9103	20.1877
ENSMUSG00000037169	Mycn	3295	v-myc avian myelocytomatosis viral related oncogene, neuroblastoma derived [Source:MGI Symbol;Acc:MGI:97357]	-2.42573	3.93223e-05	0.00239849	9.21575	3.08046
ENSMUSG00000032508	Myd88	2576	myeloid differentiation primary response gene 88 [Source:MGI Symbol;Acc:MGI:108005]	3.5296	3.95137e-05	0.00240019	2.87141	8.18402
ENSMUSG00000049764	Zfp280b	5224	zinc finger protein 280B [Source:MGI Symbol;Acc:MGI:1927865]	-2.30769	4.03402e-05	0.00244214	3.36182	1.18248
ENSMUSG00000035557	Krt17	1551	keratin 17 [Source:MGI Symbol;Acc:MGI:96691]	25.863	4.06269e-05	0.00245125	0.116276	2.59601
ENSMUSG00000035678	Tnfsf9	1290	tumor necrosis factor (ligand) superfamily, member 9 [Source:MGI Symbol;Acc:MGI:1101058]	6.11153	4.09307e-05	0.00245554	1.42527	7.10201
ENSMUSG00000040606	Kazn	10721	kazrin, periplakin interacting protein [Source:MGI Symbol;Acc:MGI:1918779]	2.21737	4.09713e-05	0.00245554	2.56948	4.63573
ENSMUSG00000041241	Mul1	4000	mitochondrial ubiquitin ligase activator of NFKB 1 [Source:MGI Symbol;Acc:MGI:1915600]	2.16715	4.15172e-05	0.00247516	5.04709	8.8539
ENSMUSG00000048807	Slc35e4	3063	solute carrier family 35, member E4 [Source:MGI Symbol;Acc:MGI:2144150]	3.52314	4.17056e-05	0.00247516	2.41791	6.83957
ENSMUSG00000085795	Zfp703	3392	zinc finger protein 703 [Source:MGI Symbol;Acc:MGI:2662729]	2.94185	4.19735e-05	0.00248251	4.52508	10.9032
ENSMUSG00000025938	Slco5a1	13137	solute carrier organic anion transporter family, member 5A1 [Source:MGI Symbol;Acc:MGI:2443431]	2.55431	4.25683e-05	0.00250683	2.09159	4.26523
ENSMUSG00000109314	Gm44699	5083	predicted gene 44699 [Source:MGI Symbol;Acc:MGI:5753275]	4.17784	4.26889e-05	0.00250683	0.731726	2.45424
ENSMUSG00000030766	Arhgap17	9759	Rho GTPase activating protein 17 [Source:MGI Symbol;Acc:MGI:1917747]	2.38988	4.2803e-05	0.00250683	4.06376	7.73244
ENSMUSG00000026596	Abl2	10800	v-abl Abelson murine leukemia viral oncogene 2 (arg, Abelson-related gene) [Source:MGI Symbol;Acc:MGI:87860]	2.08973	4.3758e-05	0.00254237	6.94095	11.6522
ENSMUSG00000033581	Igf2bp2	7402	insulin-like growth factor 2 mRNA binding protein 2 [Source:MGI Symbol;Acc:MGI:1890358]	2.67206	4.3834e-05	0.00254237	3.29727	7.11827
ENSMUSG00000037112	Sik2	9539	salt inducible kinase 2 [Source:MGI Symbol;Acc:MGI:2445031]	2.05963	4.44974e-05	0.00257255	4.94318	8.12498
ENSMUSG00000032548	Slco2a1	13545	solute carrier organic anion transporter family, member 2a1 [Source:MGI Symbol;Acc:MGI:1346021]	3.4392	4.5052e-05	0.00259461	0.863239	2.40582
ENSMUSG00000002910	Arrdc2	3232	arrestin domain containing 2 [Source:MGI Symbol;Acc:MGI:1918057]	-5.96983	4.51676e-05	0.00259461	9.96794	1.35955
ENSMUSG00000027859	Ngf	1469	nerve growth factor [Source:MGI Symbol;Acc:MGI:97321]	14.1662	4.65207e-05	0.00265537	4.01614	45.3915
ENSMUSG00000044337	Ackr3	3348	atypical chemokine receptor 3 [Source:MGI Symbol;Acc:MGI:109562]	3.52126	4.87608e-05	0.00277443	2.64239	7.60192
ENSMUSG00000035199	Arl6ip5	1442	ADP-ribosylation factor-like 6 interacting protein 5 [Source:MGI Symbol;Acc:MGI:1929501]	2.01841	4.91754e-05	0.00278042	19.1202	30.9354
ENSMUSG00000037211	Spry1	2906	sprouty RTK signaling antagonist 1 [Source:MGI Symbol;Acc:MGI:1345139]	2.8608	5.01803e-05	0.00281951	5.21656	11.9429
ENSMUSG00000028599	Tnfrsf1b	3818	tumor necrosis factor receptor superfamily, member 1b [Source:MGI Symbol;Acc:MGI:1314883]	3.66768	5.16198e-05	0.00288237	1.89653	5.6884
ENSMUSG00000028645	Slc2a1	3506	solute carrier family 2 (facilitated glucose transporter), member 1 [Source:MGI Symbol;Acc:MGI:95755]	2.05264	5.17968e-05	0.0028833	155.069	254.091
ENSMUSG00000026821	Ralgds	6345	ral guanine nucleotide dissociation stimulator [Source:MGI Symbol;Acc:MGI:107485]	2.21862	5.24872e-05	0.00291272	9.97313	17.7352
ENSMUSG00000009418	Nav1	18814	neuron navigator 1 [Source:MGI Symbol;Acc:MGI:2183683]	2.01757	5.2705e-05	0.0029136	6.40217	10.2773
ENSMUSG00000087684	1200007C13Rik	2455	RIKEN cDNA 1200007C13 gene [Source:MGI Symbol;Acc:MGI:1921369]	6.46618	5.28446e-05	0.0029136	0.638939	3.36129
ENSMUSG00000032338	Hcn4	6118	hyperpolarization-activated, cyclic nucleotide-gated K+ 4 [Source:MGI Symbol;Acc:MGI:1298209]	17.3981	5.30348e-05	0.0029136	0.498764	7.00786
ENSMUSG00000039997	Ifi203	6706	interferon activated gene 203 [Source:MGI Symbol;Acc:MGI:96428]	25.5663	5.31513e-05	0.0029136	0.0319305	0.677193
ENSMUSG00000047443	Erfe	2815	erythroferrone [Source:MGI Symbol;Acc:MGI:3606476]	206.956	5.41424e-05	0.00295891	0	0.35997
ENSMUSG00000032702	Kank1	6166	KN motif and ankyrin repeat domains 1 [Source:MGI Symbol;Acc:MGI:2147707]	3.57394	5.48327e-05	0.00297289	4.52765	13.2907
ENSMUSG00000052837	Junb	2301	jun B proto-oncogene [Source:MGI Symbol;Acc:MGI:96647]	9.50943	5.49188e-05	0.00297289	20.978	160.067
ENSMUSG00000059248	Sept9	7565	septin 9 [Source:MGI Symbol;Acc:MGI:1858222]	3.23285	5.50596e-05	0.00297289	4.84853	12.8476
ENSMUSG00000001473	Tubb6	2437	tubulin, beta 6 class V [Source:MGI Symbol;Acc:MGI:1915201]	3.3419	5.6385e-05	0.00303324	31.1827	84.5935
ENSMUSG00000020627	Klhl29	7041	kelch-like 29 [Source:MGI Symbol;Acc:MGI:2683857]	2.82187	5.65148e-05	0.00303324	1.73966	3.93657
ENSMUSG00000034275	Igsf9b	16686	immunoglobulin superfamily, member 9B [Source:MGI Symbol;Acc:MGI:2685354]	5.34918	5.7094e-05	0.00304824	1.00526	4.46099
ENSMUSG00000020407	Upp1	1961	uridine phosphorylase 1 [Source:MGI Symbol;Acc:MGI:1097668]	5.16168	5.71333e-05	0.00304824	0.89675	3.69024
ENSMUSG00000061762	Tac1	3399	tachykinin 1 [Source:MGI Symbol;Acc:MGI:98474]	49.5115	5.77805e-05	0.00306458	0.0445103	1.87025
ENSMUSG00000046474	Krtap4-16	954	keratin associated protein 4-16 [Source:MGI Symbol;Acc:MGI:3651030]	427.68	5.94508e-05	0.0031439	0	2.135
ENSMUSG00000103560	Gm38070	6480	predicted gene, 38070 [Source:MGI Symbol;Acc:MGI:5611298]	17.6089	6.14296e-05	0.00323902	0.0528685	0.751439
ENSMUSG00000028381	Ugcg	5212	UDP-glucose ceramide glucosyltransferase [Source:MGI Symbol;Acc:MGI:1332243]	2.42575	6.37688e-05	0.00334275	3.98597	7.74096
ENSMUSG00000051375	Pcdh1	8797	protocadherin 1 [Source:MGI Symbol;Acc:MGI:104692]	2.97708	6.46187e-05	0.00336767	0.931557	2.23239
ENSMUSG00000003032	Klf4	3049	Kruppel-like factor 4 (gut) [Source:MGI Symbol;Acc:MGI:1342287]	8.20673	6.49516e-05	0.00337523	25.0595	166.323
ENSMUSG00000026864	Hspa5	4229	heat shock protein 5 [Source:MGI Symbol;Acc:MGI:95835]	2.0748	6.53563e-05	0.00338151	56.5997	95.4378
ENSMUSG00000005069	Pex5	3943	peroxisomal biogenesis factor 5 [Source:MGI Symbol;Acc:MGI:1098808]	2.02135	6.54485e-05	0.00338151	6.07255	9.8376
ENSMUSG00000044813	Shb	3199	src homology 2 domain-containing transforming protein B [Source:MGI Symbol;Acc:MGI:98294]	2.01797	6.64503e-05	0.00342343	15.5351	25.0398
ENSMUSG00000115338	Pnp	3979	purine-nucleoside phosphorylase [Source:MGI Symbol;Acc:MGI:97365]	2.83644	6.79906e-05	0.00349277	2.01701	4.62593
ENSMUSG00000022280	Rnf19a	4434	ring finger protein 19A [Source:MGI Symbol;Acc:MGI:1353623]	2.0025	6.89614e-05	0.0035317	8.37642	13.3688
ENSMUSG00000032280	Tle3	11653	transducin-like enhancer of split 3 [Source:MGI Symbol;Acc:MGI:104634]	2.09249	7.01214e-05	0.00357162	8.14069	13.5557
ENSMUSG00000026773	Pfkfb3	7561	6-phosphofructo-2-kinase/fructose-2,6-biphosphatase 3 [Source:MGI Symbol;Acc:MGI:2181202]	3.08164	7.08817e-05	0.00360015	9.27589	22.684
ENSMUSG00000018774	Cd68	1257	CD68 antigen [Source:MGI Symbol;Acc:MGI:88342]	5.82732	7.15269e-05	0.00362269	0.90391	4.26619
ENSMUSG00000022602	Arc	3057	activity regulated cytoskeletal-associated protein [Source:MGI Symbol;Acc:MGI:88067]	39.9429	7.213e-05	0.00364297	5.63879	183.823
ENSMUSG00000030386	Zfp606	7680	zinc finger protein 606 [Source:MGI Symbol;Acc:MGI:1914620]	-2.10547	7.26805e-05	0.00366049	4.05237	1.56299
ENSMUSG00000007617	Homer1	11976	homer scaffolding protein 1 [Source:MGI Symbol;Acc:MGI:1347345]	3.42074	7.43721e-05	0.00373522	1.22311	3.37903
ENSMUSG00000115275	9630050E16Rik	7441	RIKEN cDNA 9630050E16 gene [Source:MGI Symbol;Acc:MGI:2443518]	4.45908	7.49497e-05	0.00375375	0.453884	1.62563
ENSMUSG00000088185	Scarna2	414	small Cajal body-specific RNA 2 [Source:MGI Symbol;Acc:MGI:3819484]	2.03288	7.62038e-05	0.00380144	91.9085	149.136
ENSMUSG00000028128	F3	2527	coagulation factor III [Source:MGI Symbol;Acc:MGI:88381]	27.0074	7.66677e-05	0.00380144	1.97454	43.9066
ENSMUSG00000053626	Tll1	7758	tolloid-like [Source:MGI Symbol;Acc:MGI:106923]	2.38155	7.67476e-05	0.00380144	0.518893	0.996838
ENSMUSG00000020250	Txnrd1	7086	thioredoxin reductase 1 [Source:MGI Symbol;Acc:MGI:1354175]	3.77484	7.72941e-05	0.00381633	15.6074	47.9724
ENSMUSG00000024750	Zfand5	10751	zinc finger, AN1-type domain 5 [Source:MGI Symbol;Acc:MGI:1278334]	2.06454	8.19809e-05	0.00398383	8.78715	14.8259
ENSMUSG00000028636	Ppcs	1605	phosphopantothenoylcysteine synthetase [Source:MGI Symbol;Acc:MGI:1915237]	-5.49308	8.48229e-05	0.00409682	2.69012	0.396484
ENSMUSG00000051985	Igfn1	8996	immunoglobulin-like and fibronectin type III domain containing 1 [Source:MGI Symbol;Acc:MGI:3045352]	2.47801	8.50764e-05	0.00409682	2.67371	5.34447
ENSMUSG00000024539	Ptpn2	3125	protein tyrosine phosphatase, non-receptor type 2 [Source:MGI Symbol;Acc:MGI:97806]	2.61788	8.54024e-05	0.00409682	6.44619	13.5966
ENSMUSG00000043557	Mdga1	9515	MAM domain containing glycosylphosphatidylinositol anchor 1 [Source:MGI Symbol;Acc:MGI:1922012]	3.33615	8.54454e-05	0.00409682	1.13233	2.99109
ENSMUSG00000020515	Cnot8	2636	CCR4-NOT transcription complex, subunit 8 [Source:MGI Symbol;Acc:MGI:1916375]	-2.26822	8.6073e-05	0.00411594	12.9895	4.68863
ENSMUSG00000072620	Slfn2	1664	schlafen 2 [Source:MGI Symbol;Acc:MGI:1313258]	8.96031	8.87481e-05	0.0042153	0.469334	3.41275
ENSMUSG00000041313	Slc7a1	11530	solute carrier family 7 (cationic amino acid transporter, y+ system), member 1 [Source:MGI Symbol;Acc:MGI:88117]	2.06088	8.88005e-05	0.0042153	3.31261	5.4577
ENSMUSG00000054203	Ifi205	4177	interferon activated gene 205 [Source:MGI Symbol;Acc:MGI:101847]	34.9393	8.88542e-05	0.0042153	0.0108705	0.357931
ENSMUSG00000016524	Il19	1149	interleukin 19 [Source:MGI Symbol;Acc:MGI:1890472]	753.969	9.31935e-05	0.00438644	0	3.37641
ENSMUSG00000052942	Glis3	8842	GLIS family zinc finger 3 [Source:MGI Symbol;Acc:MGI:2444289]	2.84381	9.35162e-05	0.00439013	1.29292	2.98055
ENSMUSG00000031278	Acsl4	5405	acyl-CoA synthetase long-chain family member 4 [Source:MGI Symbol;Acc:MGI:1354713]	2.06898	9.38323e-05	0.0043935	3.39657	5.61781
ENSMUSG00000092035	Peg10	6667	paternally expressed 10 [Source:MGI Symbol;Acc:MGI:2157785]	3.0623	9.56086e-05	0.00446504	1.96222	4.77847
ENSMUSG00000070639	Lrrc8b	6726	leucine rich repeat containing 8 family, member B [Source:MGI Symbol;Acc:MGI:2141353]	2.15074	9.82737e-05	0.00456064	2.82985	4.93091
ENSMUSG00000042379	Esm1	2097	endothelial cell-specific molecule 1 [Source:MGI Symbol;Acc:MGI:1918940]	96.8986	9.84165e-05	0.00456064	0.160408	12.5229
ENSMUSG00000044748	Defb1	872	defensin beta 1 [Source:MGI Symbol;Acc:MGI:1096878]	14.2018	9.8916e-05	0.004572	0.225895	2.70154
ENSMUSG00000039568	Ubald1	5538	UBA-like domain containing 1 [Source:MGI Symbol;Acc:MGI:1916255]	2.09791	9.95532e-05	0.00458266	3.49504	5.91048
ENSMUSG00000056383	AI987944	4009	expressed sequence AI987944 [Source:MGI Symbol;Acc:MGI:2142079]	-2.54012	9.98143e-05	0.00458266	2.82231	0.891685
ENSMUSG00000025612	Bach1	6179	BTB and CNC homology 1, basic leucine zipper transcription factor 1 [Source:MGI Symbol;Acc:MGI:894680]	2.57884	0.000100007	0.00458266	6.16357	12.7945
ENSMUSG00000039960	Rhou	3806	ras homolog family member U [Source:MGI Symbol;Acc:MGI:1916831]	-2.13577	0.000100166	0.00458266	12.1739	4.66521
ENSMUSG00000050271	Prag1	9606	PEAK1 related kinase activating pseudokinase 1 [Source:MGI Symbol;Acc:MGI:1196223]	2.46573	0.000101366	0.00461409	2.65006	5.25436
ENSMUSG00000067219	Nipal1	4393	NIPA-like domain containing 1 [Source:MGI Symbol;Acc:MGI:1917951]	7.16409	0.000102193	0.00463495	0.762308	4.36481
ENSMUSG00000093042	Mir3109	88	microRNA 3109 [Source:MGI Symbol;Acc:MGI:4834328]	14.5697	0.00010234	0.00463495	4.90467	58.0618
ENSMUSG00000025366	Esyt1	7267	extended synaptotagmin-like protein 1 [Source:MGI Symbol;Acc:MGI:1344426]	2.20877	0.000104365	0.00470295	3.6566	6.40452
ENSMUSG00000031762	Mt2	588	metallothionein 2 [Source:MGI Symbol;Acc:MGI:97172]	10.4813	0.000104764	0.00470916	34.4019	292.326
ENSMUSG00000115207	Gm49132	4144	predicted gene, 49132 [Source:MGI Symbol;Acc:MGI:6118542]	41.1617	0.000107359	0.00479788	0.036691	1.2648
ENSMUSG00000017144	Rnd3	4432	Rho family GTPase 3 [Source:MGI Symbol;Acc:MGI:1921444]	2.38869	0.000107846	0.00479788	12.9527	24.8201
ENSMUSG00000042406	Atf4	2358	activating transcription factor 4 [Source:MGI Symbol;Acc:MGI:88096]	2.14307	0.000107883	0.00479788	43.4172	74.9684
ENSMUSG00000013846	St3gal1	6851	ST3 beta-galactoside alpha-2,3-sialyltransferase 1 [Source:MGI Symbol;Acc:MGI:98304]	2.87631	0.000108072	0.00479788	2.59778	6.03913
ENSMUSG00000027832	Ptx3	2682	pentraxin related gene [Source:MGI Symbol;Acc:MGI:104641]	120.934	0.000114636	0.00505184	1.07539	105.469
ENSMUSG00000024190	Dusp1	3311	dual specificity phosphatase 1 [Source:MGI Symbol;Acc:MGI:105120]	4.37682	0.000117716	0.00517491	19.8926	70.0345
ENSMUSG00000021493	Pdlim7	4849	PDZ and LIM domain 7 [Source:MGI Symbol;Acc:MGI:1914649]	2.12029	0.000118383	0.00519152	17.4538	29.7374
ENSMUSG00000032020	Ubash3b	7326	ubiquitin associated and SH3 domain containing, B [Source:MGI Symbol;Acc:MGI:1920078]	3.55355	0.000119857	0.00522793	0.657344	1.876
ENSMUSG00000034586	Hid1	4595	HID1 domain containing [Source:MGI Symbol;Acc:MGI:2445087]	3.08517	0.000122096	0.00529467	4.16088	10.0982
ENSMUSG00000102419	Gm36940	2036	predicted gene, 36940 [Source:MGI Symbol;Acc:MGI:5610168]	5.76097	0.000122324	0.00529467	0.947402	4.31416
ENSMUSG00000025059	Gk	7743	glycerol kinase [Source:MGI Symbol;Acc:MGI:106594]	3.10958	0.000122502	0.00529467	1.03327	2.6061
ENSMUSG00000102856	Gm37084	5898	predicted gene, 37084 [Source:MGI Symbol;Acc:MGI:5610312]	3.13512	0.00012352	0.00532589	1.71971	4.27986
ENSMUSG00000022671	Mzt2	1309	mitotic spindle organizing protein 2 [Source:MGI Symbol;Acc:MGI:1922845]	4.50632	0.000124286	0.00534609	2.53656	9.10615
ENSMUSG00000019256	Ahr	6163	aryl-hydrocarbon receptor [Source:MGI Symbol;Acc:MGI:105043]	2.98804	0.000125051	0.0053594	1.05059	2.51112
ENSMUSG00000031802	Phxr4	1391	per-hexamer repeat gene 4 [Source:MGI Symbol;Acc:MGI:104522]	3.32987	0.000125426	0.0053594	3.85095	10.3215
ENSMUSG00000060594	Layn	2409	layilin [Source:MGI Symbol;Acc:MGI:2685357]	3.64387	0.00012549	0.0053594	3.54577	10.1521
ENSMUSG00000049225	Pdp1	4507	pyruvate dehyrogenase phosphatase catalytic subunit 1 [Source:MGI Symbol;Acc:MGI:2685870]	2.49198	0.00012784	0.00542112	2.59852	5.2004
ENSMUSG00000112023	Lilr4b	5439	leukocyte immunoglobulin-like receptor, subfamily B, member 4B [Source:MGI Symbol;Acc:MGI:102702]	177.6	0.000129474	0.00544996	0	0.170407
ENSMUSG00000070564	Ntn5	2216	netrin 5 [Source:MGI Symbol;Acc:MGI:2685330]	19.3519	0.000129732	0.00544996	0.161043	2.4297
ENSMUSG00000051403	Ppp1r37	4110	protein phosphatase 1, regulatory subunit 37 [Source:MGI Symbol;Acc:MGI:2687042]	2.05358	0.000130405	0.00546149	10.8221	17.6765
ENSMUSG00000027939	Nup210l	5720	nucleoporin 210-like [Source:MGI Symbol;Acc:MGI:1924845]	4.89243	0.000130643	0.00546149	0.513169	1.98132
ENSMUSG00000078249	Hmga1b	1626	high mobility group AT-hook 1B [Source:MGI Symbol;Acc:MGI:96161]	9.05846	0.000132645	0.00552072	0.205987	1.5513
ENSMUSG00000035493	Tgfbi	3771	transforming growth factor, beta induced [Source:MGI Symbol;Acc:MGI:99959]	4.26166	0.000133092	0.00552483	3.61187	12.2445
ENSMUSG00000054889	Dsp	9659	desmoplakin [Source:MGI Symbol;Acc:MGI:109611]	11.3648	0.000133665	0.00552483	0.28153	2.61389
ENSMUSG00000029863	Casp2	7057	caspase 2 [Source:MGI Symbol;Acc:MGI:97295]	-3.47246	0.0001341	0.00553008	2.33063	0.556295
ENSMUSG00000026131	Dst	41619	dystonin [Source:MGI Symbol;Acc:MGI:104627]	2.15323	0.000136407	0.0055868	32.1357	54.8338
ENSMUSG00000114282	5330431K02Rik	1963	RIKEN cDNA 5330431K02 gene [Source:MGI Symbol;Acc:MGI:1915439]	3.51575	0.000137438	0.00561057	1.79435	4.9908
ENSMUSG00000028413	B4galt1	4234	UDP-Gal:betaGlcNAc beta 1,4- galactosyltransferase, polypeptide 1 [Source:MGI Symbol;Acc:MGI:95705]	2.00648	0.000137612	0.00561057	4.47966	7.2491
ENSMUSG00000002057	Foxn1	3214	forkhead box N1 [Source:MGI Symbol;Acc:MGI:102949]	12.5115	0.000139264	0.00566509	0.458231	4.67719
ENSMUSG00000053716	Dusp7	3356	dual specificity phosphatase 7 [Source:MGI Symbol;Acc:MGI:2387100]	2.28475	0.000140684	0.00570994	6.84926	12.7443
ENSMUSG00000026586	Prrx1	11066	paired related homeobox 1 [Source:MGI Symbol;Acc:MGI:97712]	-2.12016	0.000141733	0.00572663	2.86504	1.08857
ENSMUSG00000118087	4833438C02Rik	1764	RIKEN cDNA 4833438C02 gene [Source:MGI Symbol;Acc:MGI:2147599]	3.13327	0.000143418	0.00578174	1.91318	4.85642
ENSMUSG00000115426	Gm19510	1861	predicted gene, 19510 [Source:MGI Symbol;Acc:MGI:5011695]	349.377	0.000146637	0.0058983	0	0.942348
ENSMUSG00000029664	Tfpi2	1747	tissue factor pathway inhibitor 2 [Source:MGI Symbol;Acc:MGI:108543]	425.292	0.000153404	0.00609293	0	1.17818
ENSMUSG00000024401	Tnf	1639	tumor necrosis factor [Source:MGI Symbol;Acc:MGI:104798]	272.516	0.000153407	0.00609293	0	0.787264
ENSMUSG00000022389	Tef	7867	thyrotroph embryonic factor [Source:MGI Symbol;Acc:MGI:98663]	-2.07313	0.000153509	0.00609293	18.1207	7.06986
ENSMUSG00000105818	Gm43256	3091	predicted gene 43256 [Source:MGI Symbol;Acc:MGI:5663393]	4.23612	0.000154573	0.00612165	1.13914	3.87926
ENSMUSG00000029314	Gpat3	3502	glycerol-3-phosphate acyltransferase 3 [Source:MGI Symbol;Acc:MGI:3603816]	3.52778	0.000155031	0.00612629	1.20741	3.46133
ENSMUSG00000050721	Plekho2	5547	pleckstrin homology domain containing, family O member 2 [Source:MGI Symbol;Acc:MGI:2143132]	2.20972	0.00015597	0.00614985	1.89588	3.38585
ENSMUSG00000035299	Mid1	6720	midline 1 [Source:MGI Symbol;Acc:MGI:1100537]	2.85125	0.000157545	0.00619836	2.98926	6.75844
ENSMUSG00000039886	Tmem120a	1730	transmembrane protein 120A [Source:MGI Symbol;Acc:MGI:2686991]	2.91754	0.00015945	0.00625739	3.47102	8.22431
ENSMUSG00000028191	Bcl10	4564	B cell leukemia/lymphoma 10 [Source:MGI Symbol;Acc:MGI:1337994]	2.06717	0.000160079	0.00625739	3.44548	5.7721
ENSMUSG00000090516	Rps11-ps1	475	ribosomal protein S11, pseudogene 1 [Source:MGI Symbol;Acc:MGI:3644744]	2.93686	0.000161985	0.00631775	7.23897	17.0021
ENSMUSG00000044442	N6amt1	6135	N-6 adenine-specific DNA methyltransferase 1 (putative) [Source:MGI Symbol;Acc:MGI:1915018]	-2.18359	0.000164121	0.00637342	3.50983	1.30572
ENSMUSG00000025171	Ubtd1	1687	ubiquitin domain containing 1 [Source:MGI Symbol;Acc:MGI:2385092]	2.61481	0.000164806	0.00638503	3.50444	7.45791
ENSMUSG00000073557	Ppp1r12b	14983	protein phosphatase 1, regulatory subunit 12B [Source:MGI Symbol;Acc:MGI:1916417]	2.16167	0.000165503	0.00638571	2.3081	3.94747
ENSMUSG00000050370	Ch25h	1387	cholesterol 25-hydroxylase [Source:MGI Symbol;Acc:MGI:1333869]	24.6774	0.000168803	0.00649911	0.736005	14.7954
ENSMUSG00000049303	Syt12	5539	synaptotagmin XII [Source:MGI Symbol;Acc:MGI:2159601]	4.98196	0.000169879	0.00651544	0.449674	1.84712
ENSMUSG00000071267	Zfp942	5259	zinc finger protein 942 [Source:MGI Symbol;Acc:MGI:1920483]	-3.02193	0.000170184	0.00651544	2.65848	0.705464
ENSMUSG00000028249	Sdcbp	6904	syndecan binding protein [Source:MGI Symbol;Acc:MGI:1337026]	2.00145	0.000170315	0.00651544	6.41181	10.3993
ENSMUSG00000062661	Ncs1	4653	neuronal calcium sensor 1 [Source:MGI Symbol;Acc:MGI:109166]	2.26995	0.000173684	0.00658052	2.16274	3.93477
ENSMUSG00000040857	Erf	3607	Ets2 repressor factor [Source:MGI Symbol;Acc:MGI:109637]	2.00439	0.000173846	0.00658052	8.21647	13.1142
ENSMUSG00000073411	H2-D1	2579	histocompatibility 2, D region locus 1 [Source:MGI Symbol;Acc:MGI:95896]	3.65769	0.000178169	0.00669224	8.92878	26.2749
ENSMUSG00000011837	Snapc2	1769	small nuclear RNA activating complex, polypeptide 2 [Source:MGI Symbol;Acc:MGI:1914861]	2.19768	0.000178286	0.00669224	5.9903	10.7034
ENSMUSG00000016946	Kctd5	3730	potassium channel tetramerisation domain containing 5 [Source:MGI Symbol;Acc:MGI:1916509]	-2.122	0.000179032	0.00670624	7.13271	2.69808
ENSMUSG00000022263	Trio	23395	triple functional domain (PTPRF interacting) [Source:MGI Symbol;Acc:MGI:1927230]	2.14702	0.000180301	0.0067376	7.66063	13.091
ENSMUSG00000028634	Hivep3	17627	human immunodeficiency virus type I enhancer binding protein 3 [Source:MGI Symbol;Acc:MGI:106589]	4.09627	0.000181005	0.0067376	0.733331	2.42929
ENSMUSG00000028163	Nfkb1	12061	nuclear factor of kappa light polypeptide gene enhancer in B cells 1, p105 [Source:MGI Symbol;Acc:MGI:97312]	2.97099	0.000181368	0.0067376	3.95216	9.50235
ENSMUSG00000025402	Nab2	2941	Ngfi-A binding protein 2 [Source:MGI Symbol;Acc:MGI:107563]	2.36401	0.000185116	0.00683449	6.39577	12.0275
ENSMUSG00000020044	Timp3	8144	tissue inhibitor of metalloproteinase 3 [Source:MGI Symbol;Acc:MGI:98754]	2.46462	0.000186575	0.00687128	74.4654	149.329
ENSMUSG00000020773	Trim47	2735	tripartite motif-containing 47 [Source:MGI Symbol;Acc:MGI:1917374]	2.25914	0.000186877	0.00687128	8.34659	15.0564
ENSMUSG00000021712	Trim23	5747	tripartite motif-containing 23 [Source:MGI Symbol;Acc:MGI:1933161]	-2.05055	0.000188875	0.00693057	3.94228	1.56507
ENSMUSG00000059866	Tnip2	2685	TNFAIP3 interacting protein 2 [Source:MGI Symbol;Acc:MGI:2386643]	2.3423	0.000190163	0.00696359	6.83226	12.7348
ENSMUSG00000006390	Elovl1	2726	elongation of very long chain fatty acids (FEN1/Elo2, SUR4/Elo3, yeast)-like 1 [Source:MGI Symbol;Acc:MGI:1858959]	2.5354	0.000191766	0.00700802	3.54873	7.16351
ENSMUSG00000037580	Gch1	6251	GTP cyclohydrolase 1 [Source:MGI Symbol;Acc:MGI:95675]	3.53644	0.000192612	0.00702468	1.1953	3.37428
ENSMUSG00000061458	Nol10	3021	nucleolar protein 10 [Source:MGI Symbol;Acc:MGI:2684913]	2.17598	0.000194611	0.00706889	6.59509	11.4029
ENSMUSG00000002885	Adgre5	3757	adhesion G protein-coupled receptor E5 [Source:MGI Symbol;Acc:MGI:1347095]	6.16282	0.000198186	0.0071698	0.150545	0.754427
ENSMUSG00000063428	Ddo	8925	D-aspartate oxidase [Source:MGI Symbol;Acc:MGI:1925528]	-2.79193	0.000200246	0.00718607	3.0591	0.88387
ENSMUSG00000058056	Palld	10292	palladin, cytoskeletal associated protein [Source:MGI Symbol;Acc:MGI:1919583]	2.18478	0.000200635	0.00718607	22.2011	39.3518
ENSMUSG00000054364	Rhob	2349	ras homolog family member B [Source:MGI Symbol;Acc:MGI:107949]	2.69524	0.0002055	0.00731286	34.5007	75.2553
ENSMUSG00000039990	Edrf1	6276	erythroid differentiation regulatory factor 1 [Source:MGI Symbol;Acc:MGI:1919831]	2.05828	0.000206121	0.00731286	4.08518	6.75115
ENSMUSG00000058291	Zfp68	7962	zinc finger protein 68 [Source:MGI Symbol;Acc:MGI:1344427]	-2.01476	0.000206208	0.00731286	4.34879	1.76057
ENSMUSG00000063632	Sox11	8311	SRY (sex determining region Y)-box 11 [Source:MGI Symbol;Acc:MGI:98359]	9.81708	0.000207652	0.00733403	0.171991	1.35248
ENSMUSG00000047881	Rell1	3856	RELT-like 1 [Source:MGI Symbol;Acc:MGI:2140767]	3.97684	0.00020793	0.00733403	3.64013	11.5807
ENSMUSG00000000555	Itga5	4933	integrin alpha 5 (fibronectin receptor alpha) [Source:MGI Symbol;Acc:MGI:96604]	4.60767	0.000208662	0.00734195	5.89723	22.2135
ENSMUSG00000031504	Rab20	1392	RAB20, member RAS oncogene family [Source:MGI Symbol;Acc:MGI:102789]	10.1478	0.000209853	0.0073589	0.875138	7.16749
ENSMUSG00000009633	G0s2	871	G0/G1 switch gene 2 [Source:MGI Symbol;Acc:MGI:1316737]	-8.74119	0.000209962	0.0073589	2.27011	0.210854
ENSMUSG00000068134	Zfp120	4376	zinc finger protein 120 [Source:MGI Symbol;Acc:MGI:1345179]	-3.87725	0.00021056	0.00736551	2.10364	0.442825
ENSMUSG00000038415	Foxq1	4843	forkhead box Q1 [Source:MGI Symbol;Acc:MGI:1298228]	30.9241	0.000211367	0.0073657	0.046385	1.13258
ENSMUSG00000056752	Dnah9	15949	dynein, axonemal, heavy chain 9 [Source:MGI Symbol;Acc:MGI:1289279]	2.76126	0.000211385	0.0073657	0.428773	0.949689
ENSMUSG00000074183	Gsta1	956	glutathione S-transferase, alpha 1 (Ya) [Source:MGI Symbol;Acc:MGI:1095417]	38.556	0.000213281	0.00741564	0.0316932	1.21646
ENSMUSG00000085148	Mir22hg	1924	Mir22 host gene (non-protein coding) [Source:MGI Symbol;Acc:MGI:1914348]	2.76403	0.000213643	0.00741564	4.25085	9.34195
ENSMUSG00000044786	Zfp36	3470	zinc finger protein 36 [Source:MGI Symbol;Acc:MGI:99180]	14.5569	0.000219162	0.00759255	13.9338	163.103
ENSMUSG00000044674	Fzd1	4197	frizzled class receptor 1 [Source:MGI Symbol;Acc:MGI:1196625]	-2.23894	0.000220311	0.00761767	16.2934	5.93855
ENSMUSG00000057572	Zbtb8os	4500	zinc finger and BTB domain containing 8 opposite strand [Source:MGI Symbol;Acc:MGI:1914356]	-2.03373	0.000221575	0.00763305	3.77563	1.50504
ENSMUSG00000036432	Siah2	2999	siah E3 ubiquitin protein ligase 2 [Source:MGI Symbol;Acc:MGI:108062]	3.04755	0.000221605	0.00763305	1.47275	3.6073
ENSMUSG00000002996	Hbp1	6167	high mobility group box transcription factor 1 [Source:MGI Symbol;Acc:MGI:894659]	-2.0996	0.000224727	0.00769934	7.39013	2.85617
ENSMUSG00000049421	Zfp260	5790	zinc finger protein 260 [Source:MGI Symbol;Acc:MGI:1347071]	-2.02371	0.000224959	0.00769934	5.38443	2.1694
ENSMUSG00000067942	Zfp160	7194	zinc finger protein 160 [Source:MGI Symbol;Acc:MGI:108187]	-2.88002	0.000227582	0.00774985	2.31028	0.646273
ENSMUSG00000032369	Plscr1	2462	phospholipid scramblase 1 [Source:MGI Symbol;Acc:MGI:893575]	3.11785	0.00023532	0.00792331	1.16475	2.93752
ENSMUSG00000098188	Sowahc	4482	sosondowah ankyrin repeat domain family member C [Source:MGI Symbol;Acc:MGI:3606051]	2.40131	0.000236248	0.00792351	1.78494	3.43605
ENSMUSG00000028059	Arhgef2	9844	rho/rac guanine nucleotide exchange factor (GEF) 2 [Source:MGI Symbol;Acc:MGI:103264]	2.07972	0.000236648	0.00792351	13.8444	22.9333
ENSMUSG00000032487	Ptgs2	4580	prostaglandin-endoperoxide synthase 2 [Source:MGI Symbol;Acc:MGI:97798]	39.6189	0.000237189	0.00792688	0.645041	20.9559
ENSMUSG00000110063	Gm31045	922	predicted gene, 31045 [Source:MGI Symbol;Acc:MGI:5590204]	24.1573	0.000238467	0.00795479	0.131016	2.74094
ENSMUSG00000032515	Csrnp1	3473	cysteine-serine-rich nuclear protein 1 [Source:MGI Symbol;Acc:MGI:2387989]	6.30807	0.000243272	0.00803757	10.131	52.1599
ENSMUSG00000029641	Rasl11a	1201	RAS-like, family 11, member A [Source:MGI Symbol;Acc:MGI:1916145]	7.43159	0.000245862	0.00808153	0.905268	5.35261
ENSMUSG00000035697	Arhgap45	4478	Rho GTPase activating protein 45 [Source:MGI Symbol;Acc:MGI:1917969]	5.78899	0.000248286	0.00811669	0.148889	0.6921
ENSMUSG00000060260	Pwwp2b	5963	PWWP domain containing 2B [Source:MGI Symbol;Acc:MGI:2142008]	2.25234	0.000251391	0.00820328	1.03723	1.88158
ENSMUSG00000048285	Frmd6	6392	FERM domain containing 6 [Source:MGI Symbol;Acc:MGI:2442579]	2.36197	0.000257442	0.00837801	16.2826	31.0758
ENSMUSG00000040370	Etfrf1	2682	electron transfer flavoprotein regulatory factor 1 [Source:MGI Symbol;Acc:MGI:1914886]	-2.20582	0.000257677	0.00837801	5.67133	2.087
ENSMUSG00000006403	Adamts4	4810	a disintegrin-like and metallopeptidase (reprolysin type) with thrombospondin type 1 motif, 4 [Source:MGI Symbol;Acc:MGI:1339949]	4.06779	0.00025982	0.00843244	23.6112	76.0534
ENSMUSG00000044641	Pard6b	3399	par-6 family cell polarity regulator beta [Source:MGI Symbol;Acc:MGI:2135605]	2.80699	0.000261477	0.00844062	3.38095	7.62616
ENSMUSG00000019842	Traf3ip2	3687	TRAF3 interacting protein 2 [Source:MGI Symbol;Acc:MGI:2143599]	3.86488	0.000261658	0.00844062	0.848599	2.63454
ENSMUSG00000108368	Gm45053	2499	predicted gene 45053 [Source:MGI Symbol;Acc:MGI:5753629]	5.74738	0.00026195	0.00844062	0.890473	4.06192
ENSMUSG00000022146	Osmr	12113	oncostatin M receptor [Source:MGI Symbol;Acc:MGI:1330819]	4.56468	0.000264432	0.00850534	2.64605	9.57797
ENSMUSG00000036790	Slitrk2	8080	SLIT and NTRK-like family, member 2 [Source:MGI Symbol;Acc:MGI:2679449]	3.80978	0.000265572	0.00852653	0.529695	1.61562
ENSMUSG00000055612	Cdca7	3202	cell division cycle associated 7 [Source:MGI Symbol;Acc:MGI:1914203]	-3.28566	0.000267032	0.00852653	3.77104	0.915345
ENSMUSG00000028211	Trp53inp1	6475	transformation related protein 53 inducible nuclear protein 1 [Source:MGI Symbol;Acc:MGI:1926609]	-2.66626	0.000267462	0.00852653	5.76179	1.75405
ENSMUSG00000059434	Gckr	4335	glucokinase regulatory protein [Source:MGI Symbol;Acc:MGI:1096345]	2.45598	0.000269201	0.0085668	3.84719	7.64929
ENSMUSG00000003746	Man1a	9647	mannosidase 1, alpha [Source:MGI Symbol;Acc:MGI:104677]	2.47207	0.000271811	0.00860492	1.15563	2.31424
ENSMUSG00000091956	C2cd4b	1327	C2 calcium-dependent domain containing 4B [Source:MGI Symbol;Acc:MGI:1922947]	65.4601	0.000273011	0.00862694	0.149374	8.17203
ENSMUSG00000036030	Prtg	9158	protogenin [Source:MGI Symbol;Acc:MGI:2444710]	2.31132	0.000276722	0.0086904	1.83017	3.34998
ENSMUSG00000011179	Odc1	3405	ornithine decarboxylase, structural 1 [Source:MGI Symbol;Acc:MGI:97402]	2.6139	0.000276789	0.0086904	49.6478	104.588
ENSMUSG00000032578	Cish	6419	cytokine inducible SH2-containing protein [Source:MGI Symbol;Acc:MGI:103159]	12.6454	0.000276952	0.0086904	0.146378	1.51429
ENSMUSG00000057604	Lmcd1	1730	LIM and cysteine-rich domains 1 [Source:MGI Symbol;Acc:MGI:1353635]	12.6817	0.000282923	0.00883152	0.181118	1.90984
ENSMUSG00000020439	Smtn	4380	smoothelin [Source:MGI Symbol;Acc:MGI:1354727]	3.92461	0.000284484	0.00886487	4.34643	13.8518
ENSMUSG00000074733	Zfp950	10615	zinc finger protein 950 [Source:MGI Symbol;Acc:MGI:2652824]	-2.27663	0.000299437	0.00925064	1.60415	0.567883
ENSMUSG00000003545	Fosb	6243	FBJ osteosarcoma oncogene B [Source:MGI Symbol;Acc:MGI:95575]	130.486	0.000303531	0.00936103	1.89203	198.303
ENSMUSG00000020423	Btg2	2743	B cell translocation gene 2, anti-proliferative [Source:MGI Symbol;Acc:MGI:108384]	7.09758	0.000306383	0.00943281	27.934	159.649
ENSMUSG00000025348	Itga7	8092	integrin alpha 7 [Source:MGI Symbol;Acc:MGI:102700]	4.94286	0.000308835	0.00948372	1.70273	6.6534
ENSMUSG00000037960	Card19	1477	caspase recruitment domain family, member 19 [Source:MGI Symbol;Acc:MGI:1915730]	2.13453	0.000309091	0.00948372	7.79877	13.3093
ENSMUSG00000026535	Ifi202b	1697	interferon activated gene 202B [Source:MGI Symbol;Acc:MGI:1347083]	47.3246	0.000310146	0.00948372	0.0900478	3.63984
ENSMUSG00000032502	Stac	2644	src homology three (SH3) and cysteine rich domain [Source:MGI Symbol;Acc:MGI:1201400]	4.14313	0.000313276	0.00956317	2.17561	7.34676
ENSMUSG00000006445	Epha2	4674	Eph receptor A2 [Source:MGI Symbol;Acc:MGI:95278]	2.31012	0.000314838	0.00959454	16.3887	30.7009
ENSMUSG00000021469	Msx2	3279	msh homeobox 2 [Source:MGI Symbol;Acc:MGI:97169]	-3.18657	0.000320851	0.00976125	3.76015	0.936078
ENSMUSG00000043415	Otud1	2832	OTU domain containing 1 [Source:MGI Symbol;Acc:MGI:1918448]	4.57988	0.000322233	0.0097708	7.80229	28.5816
ENSMUSG00000115161	Gm20555	3433	predicted gene, 20555 [Source:MGI Symbol;Acc:MGI:5295662]	4.12366	0.000322252	0.0097708	0.664711	2.16561
ENSMUSG00000024222	Fkbp5	9468	FK506 binding protein 5 [Source:MGI Symbol;Acc:MGI:104670]	-2.61812	0.000323927	0.00980507	5.73506	1.76598
ENSMUSG00000020019	Ntn4	3741	netrin 4 [Source:MGI Symbol;Acc:MGI:1888978]	-2.18245	0.000334606	0.0100606	30.7051	11.4766
ENSMUSG00000061232	H2-K1	2938	histocompatibility 2, K1, K region [Source:MGI Symbol;Acc:MGI:95904]	2.49574	0.000336115	0.0100887	13.89	27.762
ENSMUSG00000103593	Gm37352	2181	predicted gene, 37352 [Source:MGI Symbol;Acc:MGI:5610580]	5.76554	0.000336665	0.0100887	4.3558	19.6147
ENSMUSG00000008318	Relt	3280	RELT tumor necrosis factor receptor [Source:MGI Symbol;Acc:MGI:2443373]	3.77939	0.000338283	0.0101203	1.28954	3.91052
ENSMUSG00000111212	Gm47087	4233	predicted gene, 47087 [Source:MGI Symbol;Acc:MGI:6095814]	3.31596	0.000340087	0.0101473	3.33188	8.88707
ENSMUSG00000096957	E230013L22Rik	1856	RIKEN cDNA E230013L22 gene [Source:MGI Symbol;Acc:MGI:2142601]	27.0789	0.000345363	0.0102469	0.0490859	1.15268
ENSMUSG00000025856	Pdgfa	3119	platelet derived growth factor, alpha [Source:MGI Symbol;Acc:MGI:97527]	2.3484	0.000350292	0.010376	3.40543	6.4166
ENSMUSG00000052560	Cpne8	4164	copine VIII [Source:MGI Symbol;Acc:MGI:1914121]	2.50524	0.000352397	0.0104041	2.24025	4.5602
ENSMUSG00000032068	Plet1	1947	placenta expressed transcript 1 [Source:MGI Symbol;Acc:MGI:1923759]	12.1365	0.000353162	0.0104096	0.534251	5.34727
ENSMUSG00000113326	Gm47586	2028	predicted gene, 47586 [Source:MGI Symbol;Acc:MGI:6096627]	3.01298	0.000357338	0.0104811	3.04307	7.25326
ENSMUSG00000095253	Zfp799	6382	zinc finger protein 799 [Source:MGI Symbol;Acc:MGI:2443934]	-2.17231	0.000359177	0.010516	3.72736	1.39075
ENSMUSG00000078546	Zfp995	3167	zinc finger protein 995 [Source:MGI Symbol;Acc:MGI:1917331]	-4.24911	0.000360393	0.0105193	1.85645	0.354018
ENSMUSG00000107136	Gm42466	1301	predicted gene 42466 [Source:MGI Symbol;Acc:MGI:5662603]	7.9136	0.000361689	0.01054	0.451632	2.8649
ENSMUSG00000016559	H3f3b	2976	H3 histone, family 3B [Source:MGI Symbol;Acc:MGI:1101768]	2.16023	0.000365803	0.0106083	103.142	180.379
ENSMUSG00000027293	Ehd4	4007	EH-domain containing 4 [Source:MGI Symbol;Acc:MGI:1919619]	3.88197	0.000367069	0.0106279	3.01463	9.5029
ENSMUSG00000005413	Hmox1	1751	heme oxygenase 1 [Source:MGI Symbol;Acc:MGI:96163]	4.23133	0.00037076	0.0107175	9.63731	33.1928
ENSMUSG00000102494	Gm36988	2408	predicted gene, 36988 [Source:MGI Symbol;Acc:MGI:5610216]	3.50842	0.000373671	0.0107843	1.06469	3.05131
ENSMUSG00000026014	Raph1	20498	Ras association (RalGDS/AF-6) and pleckstrin homology domains 1 [Source:MGI Symbol;Acc:MGI:1924550]	2.18685	0.000375557	0.0107908	1.66744	2.8896
ENSMUSG00000020905	Usp43	4745	ubiquitin specific peptidase 43 [Source:MGI Symbol;Acc:MGI:2444541]	5.16753	0.000377488	0.0107908	0.146254	0.624629
ENSMUSG00000060301	2610008E11Rik	5940	RIKEN cDNA 2610008E11 gene [Source:MGI Symbol;Acc:MGI:1919378]	-2.35673	0.000377704	0.0107908	4.08023	1.41076
ENSMUSG00000018899	Irf1	3976	interferon regulatory factor 1 [Source:MGI Symbol;Acc:MGI:96590]	3.60794	0.000377736	0.0107908	7.28166	20.8047
ENSMUSG00000037321	Tap1	5476	transporter 1, ATP-binding cassette, sub-family B (MDR/TAP) [Source:MGI Symbol;Acc:MGI:98483]	2.8638	0.000379725	0.01082	1.14557	2.63767
ENSMUSG00000024206	Rfx2	7311	regulatory factor X, 2 (influences HLA class II expression) [Source:MGI Symbol;Acc:MGI:106583]	2.16234	0.000384509	0.0109041	1.2223	2.10741
ENSMUSG00000020696	Rffl	5922	ring finger and FYVE like domain containing protein [Source:MGI Symbol;Acc:MGI:1914588]	-2.00409	0.000386589	0.0109109	3.91312	1.57439
ENSMUSG00000000078	Klf6	4391	Kruppel-like factor 6 [Source:MGI Symbol;Acc:MGI:1346318]	3.76866	0.000386695	0.0109109	27.2122	82.882
ENSMUSG00000040152	Thbs1	6073	thrombospondin 1 [Source:MGI Symbol;Acc:MGI:98737]	11.5601	0.00038716	0.0109109	5.89348	54.4761
ENSMUSG00000063894	Zkscan8	8902	zinc finger with KRAB and SCAN domains 8 [Source:MGI Symbol;Acc:MGI:1913815]	-2.02687	0.000388725	0.0109207	3.89016	1.56027
ENSMUSG00000025270	Alas2	2403	aminolevulinic acid synthase 2, erythroid [Source:MGI Symbol;Acc:MGI:87990]	7.24449	0.000389612	0.0109286	0.845473	5.0716
ENSMUSG00000053846	Lipg	4715	lipase, endothelial [Source:MGI Symbol;Acc:MGI:1341803]	22.5508	0.000393267	0.0110139	0.149201	2.72577
ENSMUSG00000023892	Zfp51	2574	zinc finger protein 51 [Source:MGI Symbol;Acc:MGI:99198]	-2.67898	0.000393908	0.0110147	3.92702	1.20025
ENSMUSG00000026536	Ifi211	1785	interferon activated gene 211 [Source:MGI Symbol;Acc:MGI:3041120]	5.12091	0.000404301	0.0112878	0.288729	1.22246
ENSMUSG00000027544	Nfatc2	10578	nuclear factor of activated T cells, cytoplasmic, calcineurin dependent 2 [Source:MGI Symbol;Acc:MGI:102463]	5.02665	0.000410587	0.0114278	1.3182	5.32802
ENSMUSG00000021591	Glrx	5494	glutaredoxin [Source:MGI Symbol;Acc:MGI:2135625]	5.85428	0.00041181	0.0114441	0.286718	1.38888
ENSMUSG00000026819	Slc25a25	7862	solute carrier family 25 (mitochondrial carrier, phosphate carrier), member 25 [Source:MGI Symbol;Acc:MGI:1915913]	2.18496	0.000413955	0.0114737	4.35632	7.70656
ENSMUSG00000074179	Gm10639	1074	predicted gene 10639 [Source:MGI Symbol;Acc:MGI:3704339]	91.173	0.000414499	0.0114737	0.0140852	1.57179
ENSMUSG00000061544	Zfp229	5139	zinc finger protein 229 [Source:MGI Symbol;Acc:MGI:2679295]	-2.52843	0.000415427	0.0114737	1.86159	0.592922
ENSMUSG00000050066	A130023I24Rik	3232	RIKEN cDNA A130023I24 gene [Source:MGI Symbol;Acc:MGI:2444285]	121.956	0.000424809	0.0116612	0.00467682	0.673018
ENSMUSG00000042662	Dusp15	4391	dual specificity phosphatase-like 15 [Source:MGI Symbol;Acc:MGI:1934928]	-2.66871	0.000428304	0.0117213	10.3888	3.14681
ENSMUSG00000062825	Actg1	2658	actin, gamma, cytoplasmic 1 [Source:MGI Symbol;Acc:MGI:87906]	2.86247	0.00043453	0.0118736	96.761	225.597
ENSMUSG00000097804	Gm16685	1592	predicted gene, 16685 [Source:MGI Symbol;Acc:MGI:4439609]	309.016	0.000437204	0.0119105	0	0.987456
ENSMUSG00000019763	Rmnd1	5894	required for meiotic nuclear division 1 homolog [Source:MGI Symbol;Acc:MGI:1913334]	3.65617	0.000439031	0.0119241	2.15816	6.18841
ENSMUSG00000069874	Irgm2	3690	immunity-related GTPase family M member 2 [Source:MGI Symbol;Acc:MGI:1926262]	3.2029	0.000440741	0.0119525	1.35742	3.46849
ENSMUSG00000005686	Ampd3	5627	adenosine monophosphate deaminase 3 [Source:MGI Symbol;Acc:MGI:1096344]	4.3357	0.000442346	0.011978	0.929352	3.31875
ENSMUSG00000109429	Gm45223	5138	predicted gene 45223 [Source:MGI Symbol;Acc:MGI:5753799]	3.34701	0.000446604	0.0120691	0.6457	1.73421
ENSMUSG00000027800	Tm4sf1	4163	transmembrane 4 superfamily member 1 [Source:MGI Symbol;Acc:MGI:104678]	5.79803	0.000447054	0.0120691	12.4867	57.7668
ENSMUSG00000042988	Notum	2408	notum palmitoleoyl-protein carboxylesterase [Source:MGI Symbol;Acc:MGI:1924833]	2.88357	0.000447832	0.012072	2.72712	6.43151
ENSMUSG00000087598	Zfp111	10160	zinc finger protein 111 [Source:MGI Symbol;Acc:MGI:1929114]	-2.50507	0.000452331	0.0121568	1.6594	0.541613
ENSMUSG00000025064	Col17a1	6011	collagen, type XVII, alpha 1 [Source:MGI Symbol;Acc:MGI:88450]	9.69634	0.000453964	0.0121825	0.0842152	0.707718
ENSMUSG00000020473	Aebp1	4058	AE binding protein 1 [Source:MGI Symbol;Acc:MGI:1197012]	2.02301	0.000454932	0.0121903	25.0861	40.714
ENSMUSG00000049657	Zbtb5	5606	zinc finger and BTB domain containing 5 [Source:MGI Symbol;Acc:MGI:1924601]	-2.03299	0.00045838	0.0122462	4.93773	1.95796
ENSMUSG00000047875	Gpr157	4900	G protein-coupled receptor 157 [Source:MGI Symbol;Acc:MGI:2442046]	-3.64299	0.000460794	0.0122742	2.25798	0.495518
ENSMUSG00000034059	Ypel4	2614	yippee like 4 [Source:MGI Symbol;Acc:MGI:3605071]	3.59142	0.000461516	0.0122752	1.9251	5.50146
ENSMUSG00000114822	Gm4813	799	predicted gene 4813 [Source:MGI Symbol;Acc:MGI:3648783]	8.84406	0.000468641	0.012428	0.303278	2.19032
ENSMUSG00000032085	Tagln	1988	transgelin [Source:MGI Symbol;Acc:MGI:106012]	14.9345	0.000471668	0.0124862	2.22897	27.3187
ENSMUSG00000028435	Aqp3	1829	aquaporin 3 [Source:MGI Symbol;Acc:MGI:1333777]	13.4481	0.000474303	0.0125227	0.114794	1.32325
ENSMUSG00000042549	Map2k3os	1291	mitogen-activated protein kinase kinase 3, opposite strand [Source:MGI Symbol;Acc:MGI:1344334]	14.6742	0.000477264	0.012564	0.568235	7.15408
ENSMUSG00000035439	Haus8	5278	4HAUS augmin-like complex, subunit 8 [Source:MGI Symbol;Acc:MGI:1923728]	2.15826	0.000478723	0.012584	2.21802	3.83901
ENSMUSG00000027777	Schip1	5102	schwannomin interacting protein 1 [Source:MGI Symbol;Acc:MGI:1353557]	3.09478	0.000480021	0.0125997	0.592392	1.47826
ENSMUSG00000113776	Gm19327	3271	predicted gene, 19327 [Source:MGI Symbol;Acc:MGI:5011512]	6.14273	0.000481261	0.0126138	0.588928	2.82933
ENSMUSG00000045598	Zfp553	3976	zinc finger protein 553 [Source:MGI Symbol;Acc:MGI:2384725]	-2.07514	0.000484557	0.0126633	4.61167	1.8087
ENSMUSG00000004328	Hif3a	6710	hypoxia inducible factor 3, alpha subunit [Source:MGI Symbol;Acc:MGI:1859778]	-5.72805	0.000487364	0.0126813	2.69901	0.383211
ENSMUSG00000069089	Cdk7	3706	cyclin-dependent kinase 7 [Source:MGI Symbol;Acc:MGI:102956]	-2.22377	0.000490448	0.0127431	6.18298	2.24385
ENSMUSG00000032265	Tent5a	5703	terminal nucleotidyltransferase 5A [Source:MGI Symbol;Acc:MGI:2670964]	2.36039	0.000496498	0.0128195	2.9453	5.54496
ENSMUSG00000021091	Serpina3n	2064	serine (or cysteine) peptidase inhibitor, clade A, member 3N [Source:MGI Symbol;Acc:MGI:105045]	8.28577	0.000497652	0.0128195	9.49199	63.229
ENSMUSG00000039942	Ptger4	6648	prostaglandin E receptor 4 (subtype EP4) [Source:MGI Symbol;Acc:MGI:104311]	8.34343	0.000497663	0.0128195	0.0710262	0.490053
ENSMUSG00000071660	Ttc9c	3984	tetratricopeptide repeat domain 9C [Source:MGI Symbol;Acc:MGI:1917637]	-2.00649	0.000503406	0.012921	3.45683	1.40311
ENSMUSG00000106475	Gm43011	4433	predicted gene 43011 [Source:MGI Symbol;Acc:MGI:5663148]	2.91645	0.000503763	0.012921	1.55025	3.68778
ENSMUSG00000024912	Fosl1	2033	fos-like antigen 1 [Source:MGI Symbol;Acc:MGI:107179]	6.05508	0.000506946	0.0129736	17.9521	89.2253
ENSMUSG00000009376	Met	7679	met proto-oncogene [Source:MGI Symbol;Acc:MGI:96969]	3.17486	0.000507254	0.0129736	1.19265	3.0951
ENSMUSG00000029676	Pot1a	8669	protection of telomeres 1A [Source:MGI Symbol;Acc:MGI:2141503]	-2.31261	0.000509005	0.0129999	1.85663	0.652992
ENSMUSG00000032724	Abtb2	6032	ankyrin repeat and BTB (POZ) domain containing 2 [Source:MGI Symbol;Acc:MGI:2139365]	2.71969	0.000511567	0.0130468	1.97694	4.28456
ENSMUSG00000106443	Gm42702	4217	predicted gene 42702 [Source:MGI Symbol;Acc:MGI:5662839]	3.05612	0.000516617	0.0131112	1.22482	3.02063
ENSMUSG00000056529	Ptafr	3637	platelet-activating factor receptor [Source:MGI Symbol;Acc:MGI:106066]	13.477	0.000517118	0.0131112	0.0124542	0.152496
ENSMUSG00000038067	Csf3	1413	colony stimulating factor 3 (granulocyte) [Source:MGI Symbol;Acc:MGI:1339751]	232.911	0.000517574	0.0131112	0.105242	21.3425
ENSMUSG00000113015	Gm6296	943	predicted gene 6296 [Source:MGI Symbol;Acc:MGI:3648150]	4.3742	0.000517738	0.0131112	1.90353	6.69749
ENSMUSG00000105933	Gm43260	2430	predicted gene 43260 [Source:MGI Symbol;Acc:MGI:5663397]	4.33754	0.000522225	0.0132062	1.00898	3.51462
ENSMUSG00000113448	Gm7042	384	predicted gene 7042 [Source:MGI Symbol;Acc:MGI:3643634]	242.075	0.000526545	0.0132781	0	2.98302
ENSMUSG00000026121	Sema4c	4593	sema domain, immunoglobulin domain (Ig), transmembrane domain (TM) and short cytoplasmic domain, (semaphorin) 4C [Source:MGI Symbol;Acc:MGI:109252]	2.83063	0.000541522	0.0136176	2.77457	6.25113
ENSMUSG00000071862	Lrrtm2	6022	leucine rich repeat transmembrane neuronal 2 [Source:MGI Symbol;Acc:MGI:2389174]	14.1789	0.000544963	0.0136659	0.0672595	0.752602
ENSMUSG00000040253	Gbp7	5614	guanylate binding protein 7 [Source:MGI Symbol;Acc:MGI:2444421]	4.34896	0.000545828	0.0136685	0.505402	1.78015
ENSMUSG00000060093	Hist1h4a	539	histone cluster 1, H4a [Source:MGI Symbol;Acc:MGI:2448419]	4.16679	0.00054776	0.0136978	4.8205	16.4649
ENSMUSG00000089371	Mir1938	100	microRNA 1938 [Source:MGI Symbol;Acc:MGI:3836976]	12.7422	0.000558515	0.0138716	8.77539	88.1781
ENSMUSG00000052684	Jun	3189	jun proto-oncogene [Source:MGI Symbol;Acc:MGI:96646]	5.77304	0.000558569	0.0138716	63.949	294.743
ENSMUSG00000105071	Gm43336	4504	predicted gene 43336 [Source:MGI Symbol;Acc:MGI:5663473]	5.0113	0.000566912	0.0140401	0.298718	1.1897
ENSMUSG00000095105	Edaradd	6668	EDAR (ectodysplasin-A receptor)-associated death domain [Source:MGI Symbol;Acc:MGI:1931001]	-3.01301	0.000567755	0.0140416	1.77105	0.467527
ENSMUSG00000018012	Rac3	1293	Rac family small GTPase 3 [Source:MGI Symbol;Acc:MGI:2180784]	3.36102	0.000572598	0.0141419	1.6873	4.56056
ENSMUSG00000022673	Mcm4	3589	minichromosome maintenance complex component 4 [Source:MGI Symbol;Acc:MGI:103199]	4.00272	0.00057846	0.0142671	3.58582	11.6815
ENSMUSG00000071713	Csf2rb	7277	colony stimulating factor 2 receptor, beta, low-affinity (granulocyte-macrophage) [Source:MGI Symbol;Acc:MGI:1339759]	4.80005	0.000580824	0.0143058	0.0313281	0.128925
ENSMUSG00000053560	Ier2	1524	immediate early response 2 [Source:MGI Symbol;Acc:MGI:104815]	13.6627	0.000582577	0.0143293	10.1601	111.542
ENSMUSG00000040435	Ppp1r15a	2937	protein phosphatase 1, regulatory subunit 15A [Source:MGI Symbol;Acc:MGI:1927072]	4.1626	0.000583464	0.0143315	21.7548	73.1934
ENSMUSG00000032220	Myo1e	5704	myosin IE [Source:MGI Symbol;Acc:MGI:106621]	2.12056	0.000584712	0.0143387	2.70023	4.6504
ENSMUSG00000035861	Tmprss11b	4171	transmembrane protease, serine 11B [Source:MGI Symbol;Acc:MGI:2442893]	108.373	0.000585636	0.0143387	0	0.134768
ENSMUSG00000020205	Phlda1	2205	pleckstrin homology like domain, family A, member 1 [Source:MGI Symbol;Acc:MGI:1096880]	4.82898	0.000586946	0.0143387	8.19414	31.5547
ENSMUSG00000069184	Zfp72	4157	zinc finger protein 72 [Source:MGI Symbol;Acc:MGI:3033356]	-9.69066	0.000589659	0.0143854	0.853569	0.0752207
ENSMUSG00000041324	Inhba	6390	inhibin beta-A [Source:MGI Symbol;Acc:MGI:96570]	2.44916	0.000597008	0.0145041	27.3419	53.7509
ENSMUSG00000052415	Tchh	5823	trichohyalin [Source:MGI Symbol;Acc:MGI:2177944]	4.6428	0.000599187	0.0145194	0.601608	2.24383
ENSMUSG00000036995	Asap3	4225	ArfGAP with SH3 domain, ankyrin repeat and PH domain 3 [Source:MGI Symbol;Acc:MGI:2684986]	2.99399	0.000604181	0.0146207	2.22	5.32347
ENSMUSG00000086564	Cd101	3330	CD101 antigen [Source:MGI Symbol;Acc:MGI:2685862]	104.573	0.000608754	0.0147058	0	0.148115
ENSMUSG00000104639	Gm42939	2205	predicted gene 42939 [Source:MGI Symbol;Acc:MGI:5663076]	6.58572	0.000609335	0.0147058	0.218737	1.18364
ENSMUSG00000106749	Gm43281	2704	predicted gene 43281 [Source:MGI Symbol;Acc:MGI:5663418]	3.47987	0.000612773	0.014769	1.24552	3.45531
ENSMUSG00000036898	Zfp157	8782	zinc finger protein 157 [Source:MGI Symbol;Acc:MGI:1919404]	-2.06961	0.000616163	0.0148302	1.85691	0.72549
ENSMUSG00000104876	Trdc	3865	T cell receptor delta, constant region [Source:MGI Symbol;Acc:MGI:98612]	214.779	0.000624427	0.0149497	0	0.271934
ENSMUSG00000090919	Pabpc4l	5506	poly(A) binding protein, cytoplasmic 4-like [Source:MGI Symbol;Acc:MGI:3643087]	-5.29075	0.000626275	0.014974	0.754244	0.113445
ENSMUSG00000097971	Gm26917	3329	predicted gene, 26917 [Source:MGI Symbol;Acc:MGI:5504032]	2.04276	0.000627871	0.0149922	3133.29	5063.61
ENSMUSG00000050541	Adra1b	3382	adrenergic receptor, alpha 1b [Source:MGI Symbol;Acc:MGI:104774]	3.87325	0.000636207	0.0151711	1.43083	4.43792
ENSMUSG00000057933	Gsta2	1177	glutathione S-transferase, alpha 2 (Yc2) [Source:MGI Symbol;Acc:MGI:95863]	454.764	0.00063975	0.0152152	0	1.97523
ENSMUSG00000018920	Cxcl16	3021	chemokine (C-X-C motif) ligand 16 [Source:MGI Symbol;Acc:MGI:1932682]	5.81777	0.000645988	0.0153433	0.561666	2.70525
ENSMUSG00000045903	Npas4	4136	neuronal PAS domain protein 4 [Source:MGI Symbol;Acc:MGI:2664186]	31.106	0.0006486	0.015385	0.0219959	0.613358
ENSMUSG00000071253	Slc25a16	4799	solute carrier family 25 (mitochondrial carrier, Graves disease autoantigen), member 16 [Source:MGI Symbol;Acc:MGI:1920382]	-2.36209	0.000651494	0.015413	3.03724	1.03648
ENSMUSG00000115009	G930009F23Rik	2819	RIKEN cDNA G930009F23 gene [Source:MGI Symbol;Acc:MGI:3642701]	7.28079	0.000655634	0.0154499	0.0639771	0.386106
ENSMUSG00000046879	Irgm1	5810	immunity-related GTPase family M member 1 [Source:MGI Symbol;Acc:MGI:107567]	17.212	0.000657954	0.0154843	1.16563	16.1803
ENSMUSG00000116884	C130040N14Rik	1111	RIKEN cDNA C130040N14 gene [Source:MGI Symbol;Acc:MGI:3588257]	22.1874	0.000667041	0.015635	0.0958683	1.8128
ENSMUSG00000021025	Nfkbia	1610	nuclear factor of kappa light polypeptide gene enhancer in B cells inhibitor, alpha [Source:MGI Symbol;Acc:MGI:104741]	3.56201	0.000667834	0.015635	57.6989	167.999
ENSMUSG00000057497	Fam136a	2702	family with sequence similarity 136, member A [Source:MGI Symbol;Acc:MGI:1913738]	-2.17218	0.000668907	0.0156397	5.28699	1.9924
ENSMUSG00000053797	Krt16	1565	keratin 16 [Source:MGI Symbol;Acc:MGI:96690]	135.361	0.000673242	0.0156799	0	0.45157
ENSMUSG00000054362	Lexm	1673	lymphocyte expansion molecule [Source:MGI Symbol;Acc:MGI:2681853]	263.477	0.000678346	0.0157783	0	0.789327
ENSMUSG00000110622	Iqcn	4584	IQ motif containing N [Source:MGI Symbol;Acc:MGI:3708784]	67.6842	0.00068164	0.0158345	0.160025	8.66129
ENSMUSG00000053475	Tnfaip6	1710	tumor necrosis factor alpha induced protein 6 [Source:MGI Symbol;Acc:MGI:1195266]	27.2011	0.000686115	0.0159179	0.0705857	1.59668
ENSMUSG00000070942	Il1rl2	6812	interleukin 1 receptor-like 2 [Source:MGI Symbol;Acc:MGI:1913107]	195.831	0.000687647	0.0159328	0	0.141387
ENSMUSG00000022367	Has2	4237	hyaluronan synthase 2 [Source:MGI Symbol;Acc:MGI:107821]	81.5243	0.000694547	0.016072	0	0.0918039
ENSMUSG00000047342	Zfp286	7991	zinc finger protein 286 [Source:MGI Symbol;Acc:MGI:2384758]	-3.18529	0.000696952	0.016093	1.08891	0.276007
ENSMUSG00000027375	Mal	2778	myelin and lymphocyte protein, T cell differentiation protein [Source:MGI Symbol;Acc:MGI:892970]	5.40179	0.000697243	0.016093	0.641512	2.86743
ENSMUSG00000027580	Helz2	11529	helicase with zinc finger 2, transcriptional coactivator [Source:MGI Symbol;Acc:MGI:2385169]	3.60723	0.000702202	0.0161867	1.33697	3.87773
ENSMUSG00000022177	Haus4	2378	HAUS augmin-like complex, subunit 4 [Source:MGI Symbol;Acc:MGI:1261794]	-2.71574	0.000707612	0.0162905	4.44449	1.34098
ENSMUSG00000022512	Cldn1	4841	claudin 1 [Source:MGI Symbol;Acc:MGI:1276109]	2.99336	0.00071747	0.0164542	2.2173	5.43924
ENSMUSG00000059475	Zfp426	4888	zinc finger protein 426 [Source:MGI Symbol;Acc:MGI:1920248]	-2.11303	0.00072884	0.0166513	3.43408	1.31861
ENSMUSG00000097451	Rian	31981	RNA imprinted and accumulated in nucleus [Source:MGI Symbol;Acc:MGI:1922995]	2.28586	0.000729946	0.0166554	0.386145	0.70582
ENSMUSG00000097750	Gm4673	4452	predicted gene 4673 [Source:MGI Symbol;Acc:MGI:3782854]	-2.62701	0.00073092	0.0166565	2.77812	0.856218
ENSMUSG00000032577	Mapkapk3	5542	mitogen-activated protein kinase-activated protein kinase 3 [Source:MGI Symbol;Acc:MGI:2143163]	2.43233	0.000732437	0.0166618	0.775022	1.51704
ENSMUSG00000000982	Ccl3	766	chemokine (C-C motif) ligand 3 [Source:MGI Symbol;Acc:MGI:98260]	21.5008	0.000738482	0.016765	0.139354	2.57749
ENSMUSG00000019866	Crybg1	7799	crystallin beta-gamma domain containing 1 [Source:MGI Symbol;Acc:MGI:109544]	3.44004	0.000742007	0.0168026	5.90065	16.0357
ENSMUSG00000037405	Icam1	4360	intercellular adhesion molecule 1 [Source:MGI Symbol;Acc:MGI:96392]	7.16699	0.000745415	0.0168429	3.01229	17.4304
ENSMUSG00000043572	Pars2	3094	prolyl-tRNA synthetase (mitochondrial)(putative) [Source:MGI Symbol;Acc:MGI:2386296]	-4.32755	0.000745659	0.0168429	1.37726	0.251236
ENSMUSG00000073274	Gm14636	7009	predicted gene 14636 [Source:MGI Symbol;Acc:MGI:3641976]	5.6718	0.000752994	0.0169454	0.377054	1.71136
ENSMUSG00000103364	Gm38157	1698	predicted gene, 38157 [Source:MGI Symbol;Acc:MGI:5611385]	4.01515	0.000756696	0.0170067	2.46676	7.76074
ENSMUSG00000017002	Slpi	1180	secretory leukocyte peptidase inhibitor [Source:MGI Symbol;Acc:MGI:109297]	14.0377	0.00078193	0.0174004	0.0896553	1.03093
ENSMUSG00000070327	Rnf213	16888	ring finger protein 213 [Source:MGI Symbol;Acc:MGI:1289196]	2.14616	0.000786845	0.0174876	4.37461	7.58582
ENSMUSG00000035711	Dok3	2459	docking protein 3 [Source:MGI Symbol;Acc:MGI:1351490]	4.37817	0.000788514	0.0175031	0.245045	0.879456
ENSMUSG00000037820	Tgm2	4608	transglutaminase 2, C polypeptide [Source:MGI Symbol;Acc:MGI:98731]	2.44377	0.000791035	0.0175374	0.836639	1.67035
ENSMUSG00000072762	4930522L14Rik	2409	RIKEN cDNA 4930522L14 gene [Source:MGI Symbol;Acc:MGI:1925270]	-6.7143	0.000797586	0.0176477	1.19002	0.139882
ENSMUSG00000047501	Cldn4	1816	claudin 4 [Source:MGI Symbol;Acc:MGI:1313314]	13.8198	0.000797976	0.0176477	0.0755367	0.891251
ENSMUSG00000097418	Mir155hg	1433	Mir155 host gene (non-protein coding) [Source:MGI Symbol;Acc:MGI:5477161]	13.5029	0.000809206	0.0178085	0.168764	1.96637
ENSMUSG00000031853	Map3k21	5693	mitogen-activated protein kinase kinase kinase 21 [Source:MGI Symbol;Acc:MGI:2385307]	-2.33455	0.000825212	0.0180722	4.20444	1.46299
ENSMUSG00000053175	Bcl3	2475	B cell leukemia/lymphoma 3 [Source:MGI Symbol;Acc:MGI:88140]	5.35028	0.000828936	0.0180994	1.0638	4.62292
ENSMUSG00000032000	Birc3	5009	baculoviral IAP repeat-containing 3 [Source:MGI Symbol;Acc:MGI:1197007]	7.61576	0.000829473	0.0180994	1.90243	11.7302
ENSMUSG00000106432	Gm43259	3277	predicted gene 43259 [Source:MGI Symbol;Acc:MGI:5663396]	3.64704	0.000832936	0.018153	1.01908	2.94943
ENSMUSG00000032845	Alpk2	7960	alpha-kinase 2 [Source:MGI Symbol;Acc:MGI:2449492]	4.5532	0.000836463	0.0181857	0.405452	1.47623
ENSMUSG00000053007	Creb5	25021	cAMP responsive element binding protein 5 [Source:MGI Symbol;Acc:MGI:2443973]	2.57218	0.000844247	0.0183107	0.892907	1.8493
ENSMUSG00000042688	Mapk6	6675	mitogen-activated protein kinase 6 [Source:MGI Symbol;Acc:MGI:1354946]	2.2617	0.00084855	0.0183566	8.20782	15.0552
ENSMUSG00000085399	Foxd2os	3224	forkhead box D2, opposite strand [Source:MGI Symbol;Acc:MGI:2444065]	-2.41389	0.000849428	0.0183566	4.50613	1.49512
ENSMUSG00000027611	Procr	2031	protein C receptor, endothelial [Source:MGI Symbol;Acc:MGI:104596]	15.9207	0.000856621	0.0184851	0.347115	4.27067
ENSMUSG00000047562	Mmp10	1722	matrix metallopeptidase 10 [Source:MGI Symbol;Acc:MGI:97007]	157.688	0.000869858	0.0186858	0	0.449638
ENSMUSG00000037974	Muc5ac	10752	mucin 5, subtypes A and C, tracheobronchial/gastric [Source:MGI Symbol;Acc:MGI:104697]	24.8423	0.000871549	0.0186998	0.0383237	0.768769
ENSMUSG00000090582	Gm17024	634	predicted gene 17024 [Source:MGI Symbol;Acc:MGI:4937851]	8.59249	0.000878957	0.0188357	5.40817	37.2292
ENSMUSG00000029552	Tes	6835	testis derived transcript [Source:MGI Symbol;Acc:MGI:105081]	3.57767	0.000879977	0.0188357	0.294266	0.864044
ENSMUSG00000020427	Igfbp3	3130	insulin-like growth factor binding protein 3 [Source:MGI Symbol;Acc:MGI:96438]	4.79047	0.000884096	0.0188975	0.333857	1.32431
ENSMUSG00000072844	G530011O06Rik	2380	RIKEN cDNA G530011O06 gene [Source:MGI Symbol;Acc:MGI:3603513]	12.6803	0.000890901	0.0190017	0.214442	2.22891
ENSMUSG00000030587	2200002D01Rik	1564	RIKEN cDNA 2200002D01 gene [Source:MGI Symbol;Acc:MGI:1919525]	2.82952	0.000894011	0.0190413	1.68372	3.84148
ENSMUSG00000031805	Jak3	5352	Janus kinase 3 [Source:MGI Symbol;Acc:MGI:99928]	2.45071	0.00089488	0.0190413	0.772799	1.51664
ENSMUSG00000108614	2610306O10Rik	612	RIKEN cDNA 2610306O10 gene [Source:MGI Symbol;Acc:MGI:1917710]	4.76051	0.00090254	0.0191364	2.12298	8.22924
ENSMUSG00000049232	Tigd2	3007	tigger transposable element derived 2 [Source:MGI Symbol;Acc:MGI:1915390]	-2.31947	0.000915482	0.0193651	5.77449	2.04466
ENSMUSG00000078908	Mon1b	5120	MON1 homolog B, secretory traffciking associated [Source:MGI Symbol;Acc:MGI:1923231]	-2.00122	0.000919059	0.019418	7.99091	3.26915
ENSMUSG00000024778	Fas	2062	Fas (TNF receptor superfamily member 6) [Source:MGI Symbol;Acc:MGI:95484]	3.31269	0.000949811	0.0199531	6.40285	16.7922
ENSMUSG00000029012	Orc5	6166	origin recognition complex, subunit 5 [Source:MGI Symbol;Acc:MGI:1347044]	-2.41463	0.000949936	0.0199531	1.49279	0.489093
ENSMUSG00000108004	Gm44080	2214	predicted gene, 44080 [Source:MGI Symbol;Acc:MGI:5690472]	14.1381	0.000952641	0.0199739	0.088178	1.00617
ENSMUSG00000076436	Oxct2a	1760	3-oxoacid CoA transferase 2A [Source:MGI Symbol;Acc:MGI:1891061]	204.51	0.000958759	0.0200681	0	0.559255
ENSMUSG00000024570	Rbfa	1477	ribosome binding factor A [Source:MGI Symbol;Acc:MGI:1915981]	-2.08808	0.000964052	0.0201109	9.04454	3.50292
ENSMUSG00000022999	Lmbr1l	4338	limb region 1 like [Source:MGI Symbol;Acc:MGI:1289247]	2.31269	0.000968341	0.0201747	3.70725	6.78858
ENSMUSG00000047735	Samd9l	5427	sterile alpha motif domain containing 9-like [Source:MGI Symbol;Acc:MGI:1343184]	2.8051	0.000971687	0.020221	1.30861	2.99677
ENSMUSG00000043298	Smco3	2298	single-pass membrane protein with coiled-coil domains 3 [Source:MGI Symbol;Acc:MGI:2443451]	-2.76172	0.000983466	0.0204188	6.71058	1.97795
ENSMUSG00000106354	Gm42607	3393	predicted gene 42607 [Source:MGI Symbol;Acc:MGI:5662744]	14.7785	0.000989163	0.0205134	0.0313196	0.413486
ENSMUSG00000038151	Prdm1	5579	PR domain containing 1, with ZNF domain [Source:MGI Symbol;Acc:MGI:99655]	5.01282	0.00100021	0.0207185	0.163378	0.683955
ENSMUSG00000022003	Slc25a30	4571	solute carrier family 25, member 30 [Source:MGI Symbol;Acc:MGI:1914804]	2.29424	0.00100136	0.0207185	0.783511	1.45472
ENSMUSG00000021720	Rnf180	5579	ring finger protein 180 [Source:MGI Symbol;Acc:MGI:1919066]	2.07671	0.00100304	0.0207295	1.90659	3.16577
ENSMUSG00000016984	Etaa1	4185	Ewing tumor-associated antigen 1 [Source:MGI Symbol;Acc:MGI:1915395]	-2.23867	0.00101942	0.0210197	4.9412	1.77401
ENSMUSG00000026073	Il1r2	1908	interleukin 1 receptor, type II [Source:MGI Symbol;Acc:MGI:96546]	42.6743	0.00102128	0.0210339	0	0.106335
ENSMUSG00000025089	Gfra1	5476	glial cell line derived neurotrophic factor family receptor alpha 1 [Source:MGI Symbol;Acc:MGI:1100842]	4.01966	0.00102634	0.0211078	1.62824	5.14806
ENSMUSG00000047832	Cdca4	4198	cell division cycle associated 4 [Source:MGI Symbol;Acc:MGI:1919213]	2.72669	0.00102722	0.0211078	1.30759	2.86768
ENSMUSG00000049649	Gpr3	2734	G-protein coupled receptor 3 [Source:MGI Symbol;Acc:MGI:101908]	9.35259	0.00102946	0.0211299	0.223042	1.80482
ENSMUSG00000022750	Klhl22	5234	kelch-like 22 [Source:MGI Symbol;Acc:MGI:1337995]	-2.08735	0.00103086	0.0211344	6.32042	2.43333
ENSMUSG00000037242	Clic4	6572	chloride intracellular channel 4 (mitochondrial) [Source:MGI Symbol;Acc:MGI:1352754]	4.62597	0.00103367	0.0211437	3.00212	11.3255
ENSMUSG00000078779	Zfp59	3437	zinc finger protein 59 [Source:MGI Symbol;Acc:MGI:99206]	-2.90621	0.0010407	0.0212392	1.73505	0.487017
ENSMUSG00000010067	Rassf1	5845	Ras association (RalGDS/AF-6) domain family member 1 [Source:MGI Symbol;Acc:MGI:1928386]	2.07046	0.00104389	0.0212561	2.25713	3.73076
ENSMUSG00000031242	2610002M06Rik	6337	RIKEN cDNA 2610002M06 gene [Source:MGI Symbol;Acc:MGI:1914278]	-2.48457	0.00104616	0.0212782	1.79972	0.592548
ENSMUSG00000053113	Socs3	2891	suppressor of cytokine signaling 3 [Source:MGI Symbol;Acc:MGI:1201791]	9.08523	0.00104829	0.0212974	19.2083	138.176
ENSMUSG00000085609	1700016P03Rik	863	RIKEN cDNA 1700016P03 gene [Source:MGI Symbol;Acc:MGI:1922792]	35.4894	0.00105258	0.0213365	0.0525273	1.67463
ENSMUSG00000041347	Bdkrb1	1435	bradykinin receptor, beta 1 [Source:MGI Symbol;Acc:MGI:88144]	109.07	0.00106893	0.0216191	0	0.383668
ENSMUSG00000040659	Efhd2	2381	EF hand domain containing 2 [Source:MGI Symbol;Acc:MGI:106504]	3.40166	0.00109348	0.0219869	25.4782	70.9144
ENSMUSG00000079065	BC005561	5409	cDNA sequence BC005561 [Source:MGI Symbol;Acc:MGI:3040669]	2.05289	0.00109366	0.0219869	9.32555	15.1066
ENSMUSG00000051435	Fhad1	6141	forkhead-associated (FHA) phosphopeptide binding domain 1 [Source:MGI Symbol;Acc:MGI:1920323]	3.42228	0.00109445	0.0219869	0.667955	1.8563
ENSMUSG00000004885	Crabp2	1322	cellular retinoic acid binding protein II [Source:MGI Symbol;Acc:MGI:88491]	8.09302	0.00110732	0.0222205	0.796058	5.19818
ENSMUSG00000069917	Hba-a2	667	hemoglobin alpha, adult chain 2 [Source:MGI Symbol;Acc:MGI:96016]	7.09527	0.00110993	0.0222481	8.14109	47.9942
ENSMUSG00000105846	Gm43258	1950	predicted gene 43258 [Source:MGI Symbol;Acc:MGI:5663395]	2.91276	0.00111607	0.0223462	2.06522	4.81938
ENSMUSG00000034551	Hdx	9534	highly divergent homeobox [Source:MGI Symbol;Acc:MGI:2685226]	2.9589	0.00113289	0.0225825	0.893591	2.12423
ENSMUSG00000061286	Exosc5	6268	exosome component 5 [Source:MGI Symbol;Acc:MGI:107889]	-2.37603	0.00113587	0.0226168	1.71178	0.577371
ENSMUSG00000047798	Cd300lf	5149	CD300 molecule like family member F [Source:MGI Symbol;Acc:MGI:2442359]	22.9828	0.00115603	0.022942	0.00584631	0.130283
ENSMUSG00000038400	Pmepa1	4913	prostate transmembrane protein, androgen induced 1 [Source:MGI Symbol;Acc:MGI:1929600]	2.71189	0.00116753	0.0231191	10.5255	22.6433
ENSMUSG00000008136	Fhl2	1897	four and a half LIM domains 2 [Source:MGI Symbol;Acc:MGI:1338762]	6.15362	0.00117014	0.0231362	0.246596	1.26476
ENSMUSG00000103808	Gm37060	2397	predicted gene, 37060 [Source:MGI Symbol;Acc:MGI:5610288]	4.7876	0.00117593	0.0232081	0.306398	1.22278
[truncated: 224 more rows]

## Sheet: Biologically Significant
gene_id	SYMBOL	coding_length	DESCRIPTION	Fold_Change	PValue	FDR	WT_0H_DNA1_Avg_FPKM	WT_6H_DNA1_Avg_FPKM
[truncated: 615 more rows]
