# Supplementary material for: The Immediate Early Response of Lens Epithelial Cells to Lens Injury
Source: Cells. 2022 Nov 1;11(21):3456. doi: 10.3390/cells11213456 (PMC9654717; doi:10.3390/cells11213456)
Supplement: Supplementary file 1 [file cells-11-03456-s001.zip › Supplemental Table S4.xlsx]

## Sheet: Data Description
	Analysis Overview
	This spreadsheet is part of a study investingating the transcriptomic consequences of the conditional deletion of either Egr1 or FosB on the lens epithelial cell injury response. It sumarizes the results of a pairwise contrast between Egr1 null mouse lens epithelial cells (E1_0H) and wildtype LEC (WT_0H) profiled at zero hours after mechanical injury. Positive fold changes indicate increased expr…
	Worksheet Specification
	Worksheet	Description
	Data Description	Describes each worksheet, provides analysis overview and define column headers for data sheets
	Raw_Counts	Counts associated with all Ensembl 104 GTF features for all samples included in this contrast
	All Present Genes	All genes measured in this experiment
	Statistically Significant	All gene differentially expressed with an absolute fold change > 2 and an FDR less than 0.05
	Biologically Significant	All genes meeting criteria for biologically significant differential expression
	Biological Significance Criteria used to identify statistically and biologically significant genes Jiang J, Shihan MH, Wang Y, Duncan MK. Invest Ophthalmol Vis Sci. 2018;59(12):4986-4997. Manthey AL, Terrell AM, Lachke SA, Polson SW, Duncan MK. Genom Data. 2014;2:369-374.
	Criterion			Implementation
	Statistical significance			filter( abs(logFC) > 1 and FDR < 0.05)
	"a change in mRNA level greater than 2 FPKM"			abs(average(FPKM-Condition1) - average(FPKM-Condition2) ) > 2
	"expression level in either condition is 2 FPKM or greater"			abs(average(FPKM-Condition1)) > 2 OR abs(average(FPKM-Condition1) > 2
	Egr1 Null LEC vs Wildtype LEC 0 hours post injury
	criteria	Total	Up	Down
	Statistically Significant	59	13	46
	Biologically Significant	38	11	27
	Column Header Specification: Raw_Counts
	1 (A)	gene_id		the ensembl id of this feature
	2 (B)	SYMBOL		The symbol of the gene associated with this feature
	3 (C)	DESCRIPTION		The long-form, descriptive name of this gene from Ensembl v104
	4 (D)	SEQNAME		The name of the squence (Chromosome or contig) where this gene is located
	5 (E)	eu_length		The exon-union length of this genomic feature
	6 (F)	eu_gc		The fractional GC content of this feature
	7 (F) through 12 (K)	Sample Labels (WT_0H_1 through E1_0H_3)		Count observed for this feature in the indicated sample
	Column Header Specification: All Present Genes, Statistically Significant, Biologically Significant
	Column number (Workbook Letter)	Header		Description
	1 (A)	gene_id		the ensembl id of this feature
	2 (B)	SYMBOL		The symbol of the gene associated with this feature
	3 (C)	DESCRIPTION		The long-form, descriptive name of this gene from Ensembl v104
	4 (D)	SEQNAME		The name of the squence (Chromosome or contig) where this gene is located
	5 (E)	Fold_Change		The fold change of this gene between E1_0H and WT_0H in Lens Epithelium
	6 (F)	p_value		P_Value calculated by edgeR (E1_0H vs WT_0H)
	7 (G)	FDR		Adjusted p value reported by edgeR (E1_0H vs WT_0H)
	8 (H)	WT_0H_Avg_FPKM		Abundance of this gene (Average FPKM) observed in WT_0H
	9 (I)	E1_0H_Avg_FPKM		Abundance of this gene (Average FPKM) observed in E1_0H
	Red points indicate genes with zero counts in one group

## Sheet: Raw_Counts
gene_id	SYMBOL	DESCRIPTION	SEQNAME	eu_length	eu_gc	WT_0H_1	WT_0H_2	WT_0H_3	E1_0H_1	E1_0H_2	E1_0H_3
ENSMUSG00002074905			10	69	0.681159	0	0	0	0	0	0
ENSMUSG00002076002			17	110	0.545455	0	0	0	0	0	0
ENSMUSG00002075266			12	75	0.413333	0	0	0	0	0	0
ENSMUSG00002076008			11	145	0.62069	0	0	0	0	0	0
ENSMUSG00002074908			2	110	0.627273	0	0	0	0	0	0
ENSMUSG00002074899			GL456372.1	121	0.479339	0	0	0	0	0	0
ENSMUSG00002074901			1	141	0.432624	0	0	0	0	0	0
ENSMUSG00002075999			3	100	0.47	0	0	0	0	0	0
ENSMUSG00002074903			14	76	0.486842	0	0	1	0	0	0
ENSMUSG00002074904			2	140	0.6	1	0	0	0	0	0
ENSMUSG00002075282			X	93	0.44086	0	0	2	0	0	0
ENSMUSG00002074910			1	102	0.5	0	0	0	0	0	0
ENSMUSG00002076364			X	71	0.338028	0	0	0	0	0	0
ENSMUSG00002074921			16	96	0.416667	0	0	0	0	0	0
ENSMUSG00002074922			7	460	0.46087	0	0	0	0	0	0
ENSMUSG00000095475			JH584299.1	1446	0.482711	0	0	0	0	0	0
ENSMUSG00002074928			X	205	0.614634	0	0	0	0	0	0
ENSMUSG00002075293			3	110	0.518182	0	0	0	0	0	0
ENSMUSG00002076006			7	76	0.447368	2	0	3	0	0	0
ENSMUSG00002074931			2	131	0.51145	0	0	0	0	0	0
ENSMUSG00002074919			Y	110	0.609091	0	0	0	0	0	0
ENSMUSG00002074920			2	96	0.614583	0	0	0	0	0	0
ENSMUSG00002074917			4	72	0.597222	0	0	0	0	3	0
ENSMUSG00002074935			2	136	0.507353	8	3	5	0	4	4
ENSMUSG00002076029			17	76	0.5	0	0	0	0	0	0
ENSMUSG00002074924			6	102	0.343137	0	0	0	0	0	0
ENSMUSG00002074934			2	93	0.505376	0	0	0	0	0	0
ENSMUSG00002075290			13	150	0.6	0	0	0	0	0	0
ENSMUSG00002074940			19	104	0.413462	0	0	0	0	0	0
ENSMUSG00002074941			11	56	0.875	1	0	0	4	0	3
ENSMUSG00002074942			5	142	0.65493	0	0	0	0	0	0
ENSMUSG00002074943			2	124	0.435484	2	3	0	0	0	0
ENSMUSG00002076037			7	79	0.43038	0	0	0	0	0	0
ENSMUSG00002076038			18	119	0.546218	0	0	0	0	0	0
ENSMUSG00002074946			15	74	0.540541	0	0	0	0	0	0
ENSMUSG00002074947			7	120	0.55	0	0	0	0	0	0
ENSMUSG00002074948			14	110	0.627273	0	0	0	0	0	0
ENSMUSG00002075313			16	110	0.618182	0	0	0	0	0	0
ENSMUSG00002076043			1	442	0.255656	0	0	0	0	0	0
ENSMUSG00000047383		novel transcript	1	878	0.383827	0	0	0	0	0	0
ENSMUSG00002076032			8	101	0.49505	0	0	0	0	0	0
ENSMUSG00002074953			14	93	0.344086	0	0	0	0	0	0
ENSMUSG00002075318			18	70	0.357143	0	0	0	0	0	0
ENSMUSG00002075319			3	110	0.572727	0	1	0	0	0	0
ENSMUSG00002076009			16	129	0.418605	0	0	0	0	0	0
ENSMUSG00000094172			JH584299.1	1446	0.472337	0	0	0	0	0	0
ENSMUSG00002075686			8	94	0.478723	0	0	0	0	0	0
ENSMUSG00002075323			2	101	0.386139	0	0	0	0	0	0
ENSMUSG00002076417			14	107	0.420561	0	0	0	0	0	0
ENSMUSG00002074961			6	137	0.59854	0	0	0	0	0	0
ENSMUSG00002074962			2	188	0.351064	7	0	10	0	0	0
ENSMUSG00002074923			7	108	0.453704	0	0	0	0	0	0
ENSMUSG00002076057			1	138	0.797101	0	0	0	0	0	0
ENSMUSG00002074912			1	96	0.416667	0	0	0	0	0	0
ENSMUSG00002076059			7	121	0.495868	0	0	0	0	0	0
ENSMUSG00002074927			7	92	0.423913	0	0	0	0	0	0
ENSMUSG00002076061			7	76	0.302632	0	0	0	0	0	0
ENSMUSG00002074969			19	56	0.732143	0	3	5	0	0	0
ENSMUSG00002074970			GL456385.1	101	0.50495	0	0	0	0	0	0
ENSMUSG00002074971			8	95	0.421053	0	0	0	0	0	0
ENSMUSG00002074932			12	97	0.536082	0	0	0	0	0	0
ENSMUSG00002074933			5	78	0.576923	0	0	0	0	0	0
ENSMUSG00002074974			Y	110	0.618182	0	0	0	0	0	0
ENSMUSG00002074975			19	82	0.560976	0	0	0	0	0	0
ENSMUSG00000106759		vomeronasal 2, receptor, pseudogene 28	5	744	0.409946	0	0	0	0	0	0
ENSMUSG00002074937			8	107	0.682243	0	0	0	0	0	0
ENSMUSG00002074938			9	77	0.584416	0	0	0	0	0	0
ENSMUSG00002074979			6	110	0.581818	0	0	0	0	0	0
ENSMUSG00002076073			1	89	0.449438	0	0	0	0	0	0
ENSMUSG00002074981			10	97	0.546392	0	0	0	0	0	0
ENSMUSG00002076075			2	127	0.385827	0	0	0	0	0	0
ENSMUSG00002074983			4	101	0.376238	0	0	0	0	0	0
ENSMUSG00002076077			5	46	0.5	0	0	0	0	0	0
ENSMUSG00002076078			19	66	0.318182	0	0	0	0	0	0
ENSMUSG00002074986			6	99	0.474747	0	0	0	0	0	0
ENSMUSG00002074987			10	77	0.350649	0	0	0	0	0	0
ENSMUSG00002076081			11	78	0.461538	0	0	0	0	0	0
ENSMUSG00002075353			16	121	0.487603	0	0	0	0	0	0
ENSMUSG00002074990			1	110	0.554545	0	0	0	0	0	0
ENSMUSG00002076084			17	193	0.440415	10	0	0	0	2	1
ENSMUSG00002076085			13	67	0.402985	0	0	0	0	0	0
ENSMUSG00002074993			17	84	0.52381	0	0	0	0	0	0
ENSMUSG00002074994			15	86	0.581395	0	0	0	0	0	0
ENSMUSG00002076088			X	85	0.388235	0	0	0	0	0	0
ENSMUSG00002074956			2	187	0.411765	0	0	0	0	0	0
ENSMUSG00002076090			16	151	0.463576	0	0	0	0	0	0
ENSMUSG00002076091			12	78	0.666667	0	0	0	0	0	0
ENSMUSG00002074999			4	125	0.592	0	0	0	0	0	0
ENSMUSG00002075000			12	79	0.56962	0	0	0	0	0	0
ENSMUSG00002075001			11	71	0.859155	0	0	0	0	0	0
ENSMUSG00002075366			13	94	0.574468	0	0	0	0	0	0
ENSMUSG00002074963			7	110	0.563636	0	0	0	0	0	0
ENSMUSG00002075004			1	126	0.571429	0	0	0	0	0	0
ENSMUSG00002076098			8	190	0.442105	0	0	0	0	0	0
ENSMUSG00002075006			7	121	0.495868	0	0	0	0	0	0
ENSMUSG00002076060			7	110	0.6	0	0	0	0	0	0
ENSMUSG00002075008			18	118	0.372881	0	0	1	0	0	0
ENSMUSG00002075009			3	76	0.434211	0	0	0	0	0	0
ENSMUSG00002075010			12	110	0.618182	0	0	0	0	0	0
ENSMUSG00002075011			15	126	0.555556	0	0	0	0	0	0
ENSMUSG00002075012			3	100	0.45	0	0	0	0	0	0
ENSMUSG00002076106			4	126	0.579365	0	0	0	0	0	0
ENSMUSG00002076107			1	70	0.557143	0	0	0	0	0	0
ENSMUSG00002076108			4	96	0.5625	0	0	0	0	0	0
ENSMUSG00002075016			18	63	0.761905	0	0	0	0	0	0
ENSMUSG00002075017			10	155	0.406452	0	0	0	0	0	7
ENSMUSG00002075018			13	119	0.420168	0	0	0	0	0	0
ENSMUSG00002075019			10	104	0.519231	0	0	0	0	0	0
ENSMUSG00002075020			7	101	0.49505	0	0	0	0	0	0
ENSMUSG00002075021			3	121	0.495868	0	0	0	0	0	0
ENSMUSG00002075022			X	56	0.446429	0	0	0	0	0	0
ENSMUSG00002075023			3	110	0.618182	0	0	0	0	0	0
ENSMUSG00002075024			2	78	0.551282	0	0	0	0	0	0
ENSMUSG00002075025			1	110	0.563636	0	0	0	0	0	0
ENSMUSG00002075026			11	77	0.558442	0	0	0	0	0	0
ENSMUSG00002075027			3	74	0.5	0	0	0	0	0	0
ENSMUSG00002075028			2	233	0.55794	0	0	0	0	0	0
ENSMUSG00002076122			6	77	0.506494	0	0	0	0	0	0
ENSMUSG00002075030			17	86	0.383721	5	1	5	0	1	4
ENSMUSG00002075031			2	103	0.359223	0	0	0	0	0	0
ENSMUSG00002076004			17	90	0.244444	0	0	3	1	0	2
ENSMUSG00002075033			2	126	0.579365	0	0	0	0	0	0
ENSMUSG00002075034			2	126	0.595238	0	0	0	0	0	0
ENSMUSG00002075035			7	208	0.331731	0	0	0	0	0	0
ENSMUSG00002075400			GL456239.1	98	0.44898	0	0	0	0	0	0
ENSMUSG00002076130			13	108	0.296296	0	0	0	0	0	0
ENSMUSG00002075038			7	107	0.682243	0	0	0	0	0	0
ENSMUSG00002075403			13	129	0.643411	0	0	0	0	4	0
ENSMUSG00002076133			X	69	0.434783	0	0	0	0	0	0
ENSMUSG00000119162			16	133	0.481203	0	0	0	0	1	0
ENSMUSG00000118636		EF-hand calcium binding domain 10 (EFCAB10) pseudogene	5	239	0.414226	0	0	0	0	0	0
ENSMUSG00002076136			2	91	0.296703	0	0	0	0	0	0
ENSMUSG00002076137			14	110	0.563636	0	0	0	0	0	0
ENSMUSG00002075045			13	138	0.637681	0	0	0	0	0	0
ENSMUSG00002075046			10	83	0.590361	0	0	0	0	0	0
ENSMUSG00002075047			3	129	0.612403	0	0	0	0	0	0
ENSMUSG00002075048			5	114	0.350877	0	0	0	0	0	0
ENSMUSG00002075049			16	110	0.572727	0	0	0	0	0	0
ENSMUSG00002075050			9	121	0.495868	0	0	0	0	0	0
ENSMUSG00002074930			5	361	0.584488	0	0	0	0	0	0
ENSMUSG00002075052			8	101	0.50495	0	1	2	4	3	0
ENSMUSG00000118648		cytochrome P450, family 2, subfamily b like pseudgene	7	60	0.516667	0	0	0	0	0	0
ENSMUSG00002075054			19	125	0.424	0	0	0	0	0	0
ENSMUSG00002075055			2	104	0.317308	0	0	0	0	0	0
ENSMUSG00002075420			14	85	0.317647	0	0	0	0	0	0
ENSMUSG00002075057			X	83	0.518072	0	0	0	0	0	0
ENSMUSG00002075058			12	123	0.463415	0	0	0	0	0	0
ENSMUSG00002075059			3	128	0.5	0	0	0	0	0	0
ENSMUSG00002075060			15	86	0.546512	0	0	0	0	0	0
ENSMUSG00002076154			17	126	0.579365	0	0	0	0	0	0
ENSMUSG00002075062			4	149	0.52349	0	0	4	0	0	0
ENSMUSG00002075063			17	110	0.554545	0	0	0	0	0	0
ENSMUSG00002076157			7	110	0.572727	0	0	0	0	0	0
ENSMUSG00002076158			7	119	0.336134	2	0	0	0	0	0
ENSMUSG00002075066			5	85	0.4	0	0	0	0	0	0
ENSMUSG00002076160			3	94	0.62766	5	0	0	0	0	0
ENSMUSG00002075068			8	98	0.612245	0	0	0	0	0	0
ENSMUSG00002075069			4	110	0.572727	0	0	0	0	0	0
ENSMUSG00000118666		Zinc finger protein 932 (Zfp932) pseudogene	13	1567	0.374601	0	0	0	0	0	0
ENSMUSG00002076164			5	109	0.302752	0	0	0	0	0	0
ENSMUSG00002074951			1	127	0.480315	0	0	0	0	0	0
ENSMUSG00002074952			12	101	0.386139	0	0	0	0	0	0
ENSMUSG00000118670		mucin 19	15	22800	0.594167	3	0	0	0	0	9
ENSMUSG00002075075			11	123	0.536585	16	7	14	7	10	4
ENSMUSG00002075076			1	106	0.528302	0	0	0	0	0	0
ENSMUSG00002075077			1	57	0.701754	0	0	0	0	0	0
ENSMUSG00002076171			4	126	0.571429	0	0	0	0	0	0
ENSMUSG00002075079			15	140	0.492857	0	0	0	0	0	0
ENSMUSG00002076173			16	57	0.736842	3428	4551	6020	20374	9098	5083
ENSMUSG00002075081			9	123	0.341463	0	0	0	0	0	0
ENSMUSG00002076903			8	86	0.348837	0	0	2	0	0	0
ENSMUSG00002075083			2	96	0.59375	0	0	0	0	0	0
ENSMUSG00002075084			4	106	0.462264	0	0	0	0	0	0
ENSMUSG00002075085			2	111	0.36036	3	0	0	0	0	0
ENSMUSG00002076179			1	72	0.361111	0	0	0	0	0	0
ENSMUSG00002075451			4	121	0.495868	0	0	0	0	0	0
ENSMUSG00002075452			17	94	0.287234	0	0	0	0	0	0
ENSMUSG00002075089			12	103	0.475728	0	0	6	0	0	0
ENSMUSG00002076183			6	104	0.298077	0	0	0	0	0	0
ENSMUSG00002076184			6	126	0.603175	1	0	1	0	3	0
ENSMUSG00002075092			16	121	0.495868	0	0	0	0	0	0
ENSMUSG00002074972			13	91	0.472527	0	0	0	0	0	0
ENSMUSG00002075094			X	81	0.407407	2	11	0	0	0	0
ENSMUSG00002075095			1	62	0.645161	0	0	0	0	0	0
ENSMUSG00002076189			1	164	0.347561	0	1	0	0	0	0
ENSMUSG00002076190			12	91	0.604396	0	0	0	0	0	0
ENSMUSG00002074977			18	106	0.103774	0	0	0	0	0	0
ENSMUSG00002074978			3	114	0.570175	0	0	0	0	0	0
ENSMUSG00002076193			11	127	0.559055	0	0	0	0	0	0
ENSMUSG00002075101			18	82	0.621951	0	0	0	0	0	0
ENSMUSG00002075102			6	354	0.485876	2	5	0	0	0	0
ENSMUSG00002075103			2	82	0.487805	8	0	0	0	0	0
ENSMUSG00002075104			13	127	0.637795	0	0	0	0	0	0
ENSMUSG00002075105			18	91	0.505495	0	0	0	0	0	0
ENSMUSG00002076199			2	122	0.672131	0	0	0	0	0	0
ENSMUSG00000118719			8	132	0.477273	0	0	0	0	0	0
ENSMUSG00002075108			8	102	0.5	0	0	0	0	0	0
ENSMUSG00002075109			2	143	0.636364	0	0	0	0	0	0
ENSMUSG00002076566			7	90	0.588889	0	0	0	0	0	0
ENSMUSG00002075111			7	90	0.433333	0	0	0	0	0	0
ENSMUSG00002075112			X	109	0.568807	0	0	0	0	0	0
ENSMUSG00002075113			13	138	0.666667	0	0	0	0	0	0
ENSMUSG00000118728			9	72	0.416667	0	0	0	0	0	0
ENSMUSG00002075115			2	125	0.576	0	0	0	0	0	0
ENSMUSG00002076209			4	121	0.495868	0	0	0	0	0	0
ENSMUSG00002076089			16	66	0.409091	0	0	0	0	0	0
ENSMUSG00002075118			12	78	0.525641	0	0	0	0	0	0
ENSMUSG00002075119			1	134	0.477612	0	0	0	0	0	0
ENSMUSG00002076213			12	112	0.455357	0	0	0	0	0	0
ENSMUSG00002076214			13	91	0.274725	0	0	0	0	0	0
ENSMUSG00002075122			10	109	0.623853	0	0	0	0	0	0
ENSMUSG00002075123			16	71	0.521127	0	0	0	0	0	0
ENSMUSG00002076096			X	110	0.381818	0	0	0	0	0	0
ENSMUSG00002075125			19	119	0.336134	2	0	0	0	0	0
ENSMUSG00002076219			5	122	0.442623	0	0	0	0	0	0
ENSMUSG00002075127			7	110	0.545455	0	0	0	0	0	0
ENSMUSG00002075128			8	122	0.590164	0	0	0	0	0	0
ENSMUSG00002075129			12	114	0.561404	0	0	0	0	0	0
ENSMUSG00002075130			X	123	0.471545	0	0	0	0	0	0
ENSMUSG00002075131			9	120	0.408333	0	0	0	0	0	0
ENSMUSG00002075132			8	140	0.485714	4	4	18	1	1	0
ENSMUSG00002075133			7	110	0.627273	0	0	0	0	0	0
ENSMUSG00002075134			7	96	0.53125	0	0	0	0	0	0
ENSMUSG00002076956			2	127	0.401575	0	0	0	0	0	0
ENSMUSG00002075136			18	111	0.45045	0	0	0	0	0	0
ENSMUSG00002076230			7	101	0.49505	0	0	0	0	0	0
ENSMUSG00002075138			10	94	0.521277	0	0	0	0	0	0
ENSMUSG00002076232			2	86	0.453488	0	0	0	0	0	0
ENSMUSG00002075140			2	108	0.388889	0	0	0	0	0	0
ENSMUSG00002075141			2	82	0.439024	3	0	0	0	0	0
ENSMUSG00002075506			8	79	0.43038	0	0	0	0	0	0
ENSMUSG00002075143			2	121	0.371901	0	0	0	0	0	0
ENSMUSG00002075144			16	70	0.6	0	0	0	0	0	0
ENSMUSG00002075145			10	109	0.477064	0	0	0	0	0	0
ENSMUSG00002076239			4	125	0.584	0	2	0	1	0	0
ENSMUSG00002076240			17	102	0.5	0	0	0	0	0	0
ENSMUSG00002075148			14	107	0.672897	0	0	0	0	0	0
ENSMUSG00000118778			17	88	0.443182	0	0	0	0	0	0
ENSMUSG00002075150			12	77	0.558442	0	0	0	0	0	0
ENSMUSG00002075151			9	184	0.61413	4	0	0	0	7	0
ENSMUSG00002075152			8	63	0.301587	0	0	0	0	0	0
ENSMUSG00002076125			2	125	0.592	0	0	0	0	0	0
ENSMUSG00002076247			10	99	0.393939	0	0	0	0	0	0
ENSMUSG00002075155			3	119	0.420168	0	0	0	0	0	0
ENSMUSG00000110493		olfactory receptor 841, pseudogene 1	9	848	0.376179	0	0	0	0	0	0
ENSMUSG00002075157			7	78	0.397436	0	0	0	0	0	0
ENSMUSG00002075158			14	126	0.587302	0	0	0	0	0	0
ENSMUSG00002075159			2	127	0.393701	0	0	0	0	0	0
ENSMUSG00002076253			1	83	0.373494	0	0	0	0	0	0
ENSMUSG00002075889			13	80	0.5	0	0	0	0	0	0
ENSMUSG00002075162			2	114	0.333333	0	0	0	0	0	0
ENSMUSG00002076256			X	124	0.403226	0	0	0	0	0	0
ENSMUSG00002075164			3	272	0.547794	0	0	0	0	0	0
ENSMUSG00002075165			1	98	0.479592	0	0	0	0	0	0
ENSMUSG00000118018		novel transcript	18	3704	0.37527	3	0	0	0	0	0
ENSMUSG00002076260			7	98	0.438776	1	2	0	0	0	0
ENSMUSG00002075168			6	62	0.419355	0	0	0	0	0	0
ENSMUSG00002075169			15	109	0.623853	0	0	0	0	0	0
ENSMUSG00002076263			2	126	0.579365	0	0	0	0	0	0
ENSMUSG00002075171			10	76	0.407895	0	0	0	0	0	0
ENSMUSG00002076144			2	121	0.421488	0	0	0	0	0	0
ENSMUSG00002075173			3	214	0.593458	0	0	0	0	0	0
ENSMUSG00002076267			X	86	0.395349	0	0	0	0	0	0
ENSMUSG00002076268			14	86	0.476744	0	0	0	0	0	0
ENSMUSG00002075176			10	126	0.571429	1	0	0	0	0	0
ENSMUSG00002075177			2	90	0.388889	0	0	0	0	0	0
ENSMUSG00002075178			2	127	0.393701	0	0	0	0	0	0
ENSMUSG00002076272			5	144	0.506944	0	0	0	0	0	0
ENSMUSG00002075180			3	141	0.64539	4	7	4	12	1	6
ENSMUSG00002076274			7	88	0.579545	0	3	1	0	0	1
ENSMUSG00002075182			13	107	0.570093	0	3	0	0	0	0
ENSMUSG00000111781		olfactory receptor 939, pseudogene 1	9	766	0.369452	0	0	0	0	0	0
ENSMUSG00002075184			13	110	0.554545	0	0	0	0	0	0
ENSMUSG00002075185			13	125	0.56	0	0	0	0	0	0
ENSMUSG00002075550			1	110	0.572727	0	0	0	0	0	0
ENSMUSG00002076280			1	89	0.325843	2	0	0	2	0	1
ENSMUSG00002075188			4	57	0.736842	1	0	0	0	0	0
ENSMUSG00002076282			X	126	0.579365	0	0	0	0	0	0
ENSMUSG00002075190			2	122	0.368852	0	0	0	0	0	0
ENSMUSG00002075191			8	175	0.445714	0	0	0	0	0	0
ENSMUSG00002075192			17	174	0.431034	0	0	0	0	0	0
ENSMUSG00002075072			8	125	0.536	0	0	0	0	0	0
ENSMUSG00002075073			17	121	0.495868	0	0	0	0	0	0
ENSMUSG00002075559			7	70	0.5	2	5	0	0	0	0
ENSMUSG00002075196			6	83	0.493976	0	0	0	0	0	0
ENSMUSG00002075197			9	123	0.373984	0	0	0	0	0	0
ENSMUSG00000116563		novel protein	2	180	0.455556	0	0	0	0	0	0
ENSMUSG00002075199			16	117	0.376068	0	0	0	0	0	0
ENSMUSG00002075564			5	79	0.468354	0	0	0	0	0	0
ENSMUSG00002075201			2	121	0.413223	0	0	0	0	0	0
ENSMUSG00002075202			10	111	0.423423	0	0	0	0	0	0
ENSMUSG00002076296			2	126	0.404762	0	0	0	0	0	0
ENSMUSG00002075204			3	110	0.627273	0	0	0	0	0	0
ENSMUSG00002076298			3	121	0.479339	2	0	0	1	0	0
ENSMUSG00002076299			13	138	0.666667	0	6	0	0	0	0
ENSMUSG00002075207			17	92	0.576087	0	0	0	0	0	0
ENSMUSG00002075208			2	458	0.399563	0	0	0	0	0	0
ENSMUSG00002076302			6	184	0.472826	4	3	0	0	0	1
ENSMUSG00002075574			14	114	0.263158	0	0	0	0	0	0
ENSMUSG00002075211			7	110	0.563636	0	0	1	0	0	0
ENSMUSG00002075212			6	207	0.318841	0	0	0	0	0	0
ENSMUSG00002075213			1	121	0.495868	0	0	0	0	0	0
ENSMUSG00002075214			7	70	0.571429	0	0	0	0	0	0
ENSMUSG00002075215			9	125	0.56	3	0	0	0	0	0
ENSMUSG00002075216			4	76	0.671053	0	0	0	0	0	0
ENSMUSG00002075217			7	95	0.421053	0	0	0	0	0	0
ENSMUSG00002075218			13	97	0.309278	0	0	0	0	0	0
ENSMUSG00002076312			X	88	0.375	0	0	0	0	0	0
ENSMUSG00002076313			11	81	0.555556	0	0	1	0	0	0
ENSMUSG00002075585			6	132	0.325758	0	0	0	0	0	0
ENSMUSG00002075222			4	77	0.636364	0	0	0	0	0	0
ENSMUSG00000119431			2	133	0.488722	0	0	0	0	0	0
ENSMUSG00002075224			6	91	0.56044	0	0	0	0	0	0
ENSMUSG00002075225			1	110	0.590909	0	0	0	0	0	0
ENSMUSG00002076319			15	107	0.672897	0	0	0	0	0	0
ENSMUSG00002075227			11	78	0.512821	0	2	0	0	1	0
ENSMUSG00002076321			3	110	0.618182	0	0	0	0	0	0
ENSMUSG00002075229			5	122	0.221311	0	0	0	0	0	0
ENSMUSG00000118903			15	132	0.424242	0	0	0	0	0	0
ENSMUSG00002075231			4	133	0.842105	3	9	11	26	11	14
ENSMUSG00002075232			16	126	0.579365	0	0	0	0	0	0
ENSMUSG00002075233			4	109	0.559633	0	0	0	0	0	0
ENSMUSG00002075234			5	110	0.627273	0	0	0	0	0	0
ENSMUSG00002076328			1	110	0.618182	0	0	0	0	0	0
ENSMUSG00002075236			10	129	0.325581	0	0	0	0	0	0
ENSMUSG00002075601			13	125	0.592	0	0	0	0	0	0
ENSMUSG00002075117			3	109	0.605505	0	0	0	0	0	0
ENSMUSG00002075238			6	129	0.511628	0	0	0	0	0	0
ENSMUSG00002075240			2	104	0.317308	0	0	0	0	0	0
ENSMUSG00002075241			17	102	0.5	0	0	0	0	0	0
ENSMUSG00002076335			12	67	0.447761	0	0	0	0	0	0
ENSMUSG00002075243			9	73	0.424658	0	0	0	0	0	0
ENSMUSG00002075244			11	54	0.62963	0	0	0	0	0	0
ENSMUSG00002075245			14	89	0.213483	0	0	0	0	0	0
ENSMUSG00002076339			1	80	0.475	0	0	0	0	0	0
ENSMUSG00002075247			15	199	0.502513	0	0	0	0	0	0
ENSMUSG00002075248			18	70	0.271429	0	0	0	0	2	0
ENSMUSG00000094722			JH584298.1	1446	0.464039	0	0	0	0	0	0
ENSMUSG00002075250			19	159	0.471698	1	0	3	0	0	0
ENSMUSG00002076344			2	96	0.5625	0	0	0	0	0	0
ENSMUSG00000094728			GL456221.1	372	0.502688	0	0	0	0	0	0
ENSMUSG00002076346			1	82	0.52439	0	0	0	0	0	0
ENSMUSG00002075254			3	110	0.627273	0	0	0	0	0	0
ENSMUSG00002075619			4	64	0.34375	0	0	0	0	0	0
ENSMUSG00002075620			11	63	0.539683	0	0	0	0	0	0
ENSMUSG00002075257			4	110	0.754545	0	0	0	0	0	0
ENSMUSG00002075258			7	210	0.438095	0	0	0	0	0	0
ENSMUSG00002076352			17	199	0.698492	9	3	7	1	2	10
ENSMUSG00000094741			GL456354.1	1224	0.482843	0	0	0	0	0	0
ENSMUSG00002076354			10	119	0.504202	0	0	0	0	0	0
ENSMUSG00002075262			8	80	0.575	0	0	0	0	0	0
ENSMUSG00002075263			16	68	0.544118	0	0	0	0	0	0
ENSMUSG00002075264			9	119	0.361345	0	0	0	0	0	0
ENSMUSG00000095450			GL456221.1	372	0.502688	0	0	0	0	0	0
ENSMUSG00002075630			X	101	0.49505	0	0	0	0	0	0
ENSMUSG00002075267			12	64	0.375	0	0	0	0	0	0
ENSMUSG00002075268			6	92	0.445652	0	0	0	0	0	0
ENSMUSG00002075269			6	111	0.468468	0	0	0	0	0	0
ENSMUSG00002076727			7	107	0.579439	0	0	0	0	0	0
ENSMUSG00002076485			4	121	0.495868	0	0	0	0	0	0
ENSMUSG00002075272			2	118	0.372881	0	0	0	0	0	0
ENSMUSG00002076366			1	62	0.645161	0	0	0	0	0	0
ENSMUSG00002076367			13	138	0.666667	0	0	0	0	0	0
ENSMUSG00002075275			6	180	0.322222	0	0	0	0	0	0
ENSMUSG00002076369			13	142	0.507042	0	0	0	0	0	0
ENSMUSG00002076370			7	217	0.382488	0	0	0	0	0	0
ENSMUSG00002076734			6	70	0.328571	0	0	2	0	0	0
ENSMUSG00002075279			12	98	0.489796	0	0	0	0	0	0
ENSMUSG00002075644			6	110	0.618182	0	0	0	0	0	0
ENSMUSG00002076738			9	92	0.445652	0	0	0	0	0	0
ENSMUSG00002075646			X	78	0.538462	0	0	0	0	0	0
ENSMUSG00002076376			9	101	0.247525	0	0	0	0	0	0
ENSMUSG00002075284			X	69	0.565217	0	0	0	0	0	0
ENSMUSG00002076742			11	77	0.545455	0	0	0	0	0	0
ENSMUSG00002075286			6	101	0.49505	0	0	0	0	0	0
ENSMUSG00002076744			14	136	0.382353	0	0	0	0	0	0
ENSMUSG00002076381			3	65	0.615385	0	0	0	0	0	0
ENSMUSG00002075289			1	107	0.672897	0	0	0	0	0	0
ENSMUSG00002076018			12	117	0.393162	0	0	0	0	0	0
ENSMUSG00002075655			9	101	0.564356	0	0	0	0	0	0
ENSMUSG00002075292			4	129	0.317829	0	0	0	0	0	0
ENSMUSG00000095505			JH584296.1	837	0.46595	0	0	0	0	0	0
ENSMUSG00002075294			8	121	0.479339	1	0	0	0	0	0
ENSMUSG00002076388			2	123	0.333333	0	0	0	0	0	0
ENSMUSG00002075296			X	127	0.472441	0	0	0	0	0	0
ENSMUSG00002075297			17	59	0.79661	0	0	0	0	0	0
ENSMUSG00002076391			18	104	0.567308	0	0	0	0	0	0
ENSMUSG00000119010			14	132	0.484848	0	0	0	0	0	0
ENSMUSG00002075300			8	145	0.193103	0	0	0	0	0	0
ENSMUSG00002075301			11	144	0.284722	0	0	0	0	0	0
ENSMUSG00002075666			6	125	0.584	0	0	0	0	0	0
ENSMUSG00002075303			16	65	0.307692	0	0	0	0	0	0
ENSMUSG00002075304			11	177	0.384181	0	0	0	0	0	0
ENSMUSG00002075305			8	58	0.327586	0	0	0	0	0	0
ENSMUSG00002075306			12	120	0.358333	0	0	0	0	0	0
ENSMUSG00002076764			5	78	0.564103	0	0	0	0	0	0
ENSMUSG00002075308			16	111	0.279279	0	0	0	0	0	0
ENSMUSG00002076402			4	129	0.395349	0	0	0	0	0	0
ENSMUSG00002076403			5	69	0.449275	0	0	0	0	0	0
ENSMUSG00002076404			2	123	0.390244	5	0	0	0	0	0
ENSMUSG00002075312			3	138	0.557971	0	0	0	0	0	0
ENSMUSG00002075677			13	76	0.671053	0	0	0	0	0	0
ENSMUSG00002076407			13	100	0.47	0	0	0	0	0	0
ENSMUSG00000118852			8	132	0.507576	0	0	0	0	0	0
ENSMUSG00002075316			6	96	0.270833	0	0	0	0	0	0
ENSMUSG00002075317			1	110	0.572727	0	0	0	0	0	0
ENSMUSG00002076046			19	261	0.35249	0	0	0	0	0	0
ENSMUSG00002075683			18	50	0.92	0	0	0	0	0	0
ENSMUSG00002076413			X	128	0.375	0	0	0	0	0	0
ENSMUSG00002075321			7	110	0.609091	0	0	0	0	0	0
ENSMUSG00002076414			1	78	0.525641	0	0	0	0	0	0
ENSMUSG00002076780			1	121	0.495868	0	0	0	0	0	0
ENSMUSG00002075688			18	110	0.590909	0	0	0	0	0	0
ENSMUSG00002076418			6	110	0.618182	0	0	0	0	0	0
ENSMUSG00002076419			7	80	0.5875	0	0	0	0	0	0
ENSMUSG00002075691			8	77	0.545455	0	0	0	0	2	0
ENSMUSG00002076421			17	88	0.534091	13	10	8	15	2	5
ENSMUSG00002076058			8	125	0.576	0	0	0	0	0	0
ENSMUSG00002075330			6	171	0.479532	0	0	0	0	0	0
ENSMUSG00000119589			13	133	0.398496	0	2	0	0	1	0
ENSMUSG00002075332			19	407	0.447174	0	0	0	0	0	0
ENSMUSG00002076426			5	93	0.462366	0	0	0	0	0	0
ENSMUSG00002075334			11	126	0.587302	0	0	0	0	0	0
ENSMUSG00002076428			6	110	0.563636	0	0	0	0	0	0
ENSMUSG00002075336			13	114	0.377193	1	1	0	0	0	0
ENSMUSG00002075337			2	101	0.49505	0	0	0	0	0	0
ENSMUSG00002075338			19	78	0.576923	5	8	1	4	0	2
ENSMUSG00002075339			7	66	0.575758	0	0	0	0	0	0
ENSMUSG00002075340			13	108	0.268519	0	0	0	0	0	0
ENSMUSG00002075341			11	73	0.260274	0	0	0	0	0	0
ENSMUSG00002075342			6	102	0.5	0	0	0	0	0	0
ENSMUSG00002075343			13	83	0.325301	0	0	0	0	0	0
ENSMUSG00002075344			6	214	0.406542	0	0	0	0	0	0
ENSMUSG00002075345			15	232	0.37069	0	0	0	0	0	0
ENSMUSG00002075346			3	109	0.33945	4	7	0	0	0	0
ENSMUSG00002075347			7	126	0.571429	0	0	0	0	0	0
ENSMUSG00002075348			3	107	0.672897	0	0	0	0	0	0
ENSMUSG00002075349			15	102	0.5	0	0	0	0	0	0
ENSMUSG00002075350			13	116	0.534483	0	0	0	0	0	0
ENSMUSG00002075715			10	73	0.315068	0	0	0	0	0	0
ENSMUSG00002075352			7	94	0.595745	0	0	0	0	0	0
ENSMUSG00002075717			15	126	0.571429	0	0	0	0	0	0
ENSMUSG00002075354			4	90	0.5	0	0	0	0	0	0
ENSMUSG00002075355			1	122	0.5	0	0	0	0	0	0
ENSMUSG00002076449			5	78	0.589744	0	0	0	0	0	0
ENSMUSG00002076450			11	108	0.509259	0	0	0	0	0	0
ENSMUSG00002076451			12	70	0.7	0	0	0	0	0	0
ENSMUSG00000094915			GL456212.1	366	0.418033	0	0	0	0	0	0
ENSMUSG00002075360			4	74	0.364865	3	2	0	0	1	0
ENSMUSG00002075361			8	153	0.581699	0	0	0	0	0	0
ENSMUSG00000119100			6	132	0.469697	0	0	0	0	0	0
ENSMUSG00002076456			4	96	0.46875	0	3	4	0	0	0
ENSMUSG00002075364			6	101	0.49505	0	0	0	0	0	0
ENSMUSG00002075365			4	121	0.38843	0	0	0	0	0	0
ENSMUSG00002076823			10	237	0.518987	0	0	0	0	0	0
ENSMUSG00002075367			15	92	0.336957	0	0	0	0	0	0
ENSMUSG00002075368			1	88	0.625	0	0	0	0	0	0
ENSMUSG00000119112			2	132	0.484848	0	0	0	0	0	0
ENSMUSG00002075370			14	105	0.552381	0	0	0	0	0	0
ENSMUSG00002075371			2	68	0.279412	0	0	0	0	0	0
ENSMUSG00002075372			19	126	0.563492	0	0	0	0	0	0
ENSMUSG00002075373			8	111	0.558559	0	0	0	0	0	0
ENSMUSG00002075374			10	72	0.458333	0	0	0	0	0	0
ENSMUSG00002075375			10	162	0.462963	0	0	0	0	0	0
ENSMUSG00002075376			15	60	0.666667	0	0	0	0	0	0
ENSMUSG00002075377			1	75	0.466667	0	0	0	0	0	0
ENSMUSG00002075378			1	96	0.59375	0	0	0	0	0	0
ENSMUSG00002076472			2	103	0.621359	0	0	0	0	0	0
ENSMUSG00002076473			2	96	0.322917	0	0	0	0	0	0
ENSMUSG00002075381			19	132	0.333333	0	0	0	0	0	0
ENSMUSG00002075382			16	110	0.636364	0	0	0	0	0	0
ENSMUSG00002075383			11	97	0.536082	0	0	0	0	0	0
ENSMUSG00002075384			7	96	0.59375	0	0	0	0	0	0
ENSMUSG00002075385			13	196	0.418367	0	0	0	0	0	0
ENSMUSG00002076479			18	74	0.810811	0	0	0	0	0	0
ENSMUSG00002076480			4	60	0.55	0	0	0	0	0	0
ENSMUSG00002075388			11	96	0.65625	0	0	0	0	0	0
ENSMUSG00002076482			15	101	0.49505	0	0	0	0	0	0
ENSMUSG00002075390			X	92	0.532609	0	0	0	0	0	0
ENSMUSG00002076484			19	104	0.403846	0	0	0	0	0	0
ENSMUSG00002075513			9	67	0.432836	0	0	0	0	0	0
ENSMUSG00002075757			X	100	0.59	0	0	0	0	0	0
ENSMUSG00002076487			11	109	0.550459	0	0	0	0	0	0
ENSMUSG00002075395			13	108	0.564815	0	0	0	0	0	0
ENSMUSG00002076489			2	89	0.426966	0	0	6	0	0	0
ENSMUSG00002075397			6	96	0.65625	0	0	0	0	0	0
ENSMUSG00002076491			9	69	0.565217	0	0	0	0	0	0
ENSMUSG00002075399			X	115	0.391304	0	0	0	0	0	0
ENSMUSG00002075764			4	60	0.716667	0	0	0	0	0	0
ENSMUSG00002076494			14	161	0.391304	0	0	0	0	0	0
ENSMUSG00002075766			5	98	0.418367	0	0	0	0	0	0
ENSMUSG00002076860			7	129	0.465116	7	9	1	0	0	1
ENSMUSG00002076861			12	121	0.561983	0	0	0	0	0	0
ENSMUSG00002075769			7	101	0.50495	0	0	0	0	0	0
ENSMUSG00000119163			13	133	0.390977	2	0	0	0	2	3
ENSMUSG00002076500			2	137	0.576642	0	0	0	0	0	0
ENSMUSG00000119166			8	92	0.380435	0	0	0	0	0	0
ENSMUSG00002076502			7	110	0.545455	0	0	0	0	0	0
ENSMUSG00002075410			4	84	0.5	0	0	0	0	0	0
ENSMUSG00000119172			6	129	0.503876	0	0	0	0	0	0
ENSMUSG00002075412			X	119	0.478992	0	0	0	0	0	1
ENSMUSG00002075413			15	57	0.649123	0	0	0	0	0	0
ENSMUSG00002075414			5	150	0.573333	0	0	0	0	0	0
ENSMUSG00002075415			3	127	0.307087	0	0	0	0	0	0
ENSMUSG00002076509			16	95	0.421053	0	0	0	0	0	0
ENSMUSG00002076510			2	120	0.425	0	0	0	0	0	0
ENSMUSG00002076511			5	87	0.402299	0	0	0	0	0	0
ENSMUSG00002076512			3	101	0.49505	0	0	0	0	0	0
ENSMUSG00002076877			6	74	0.648649	1	0	1	0	1	0
ENSMUSG00002075421			9	128	0.546875	1	1	0	0	0	0
ENSMUSG00002076515			13	138	0.666667	0	0	0	0	3	0
ENSMUSG00002075423			7	61	0.295082	0	0	0	0	0	0
ENSMUSG00002075424			16	98	0.561224	0	0	0	0	0	0
ENSMUSG00002075425			8	137	0.510949	0	0	0	0	0	0
ENSMUSG00002076519			7	110	0.590909	0	0	0	0	0	0
ENSMUSG00002076520			13	101	0.49505	0	0	0	0	0	0
ENSMUSG00002076521			5	110	0.609091	0	0	0	0	0	0
ENSMUSG00002076522			4	103	0.533981	0	0	0	0	0	0
ENSMUSG00002075430			18	185	0.513514	0	0	0	0	0	0
ENSMUSG00002075431			2	370	0.391892	0	0	0	0	0	0
ENSMUSG00002075796			17	82	0.878049	0	0	0	0	0	0
ENSMUSG00002075433			14	118	0.525424	0	0	0	0	0	0
ENSMUSG00002075797			17	113	0.628319	0	0	0	0	0	0
ENSMUSG00002075435			18	121	0.495868	0	0	0	0	0	0
ENSMUSG00002075315			13	103	0.572816	0	0	0	0	0	0
ENSMUSG00002076530			13	171	0.444444	10	6	2	6	6	4
ENSMUSG00002076166			X	110	0.572727	0	0	0	0	0	0
ENSMUSG00002075439			2	65	0.446154	0	0	0	0	0	0
ENSMUSG00002075440			15	116	0.517241	0	0	0	0	0	0
ENSMUSG00002076534			4	77	0.519481	0	0	4	0	0	1
ENSMUSG00002076535			15	169	0.260355	0	0	0	0	0	0
ENSMUSG00000095092			GL456210.1	366	0.483607	0	0	0	0	0	0
ENSMUSG00002075444			13	141	0.680851	0	0	0	0	0	0
ENSMUSG00002075445			X	128	0.46875	0	0	0	0	0	0
ENSMUSG00000119221			X	114	0.403509	0	0	0	0	0	0
ENSMUSG00002076540			2	118	0.313559	0	0	0	0	0	0
ENSMUSG00002075448			6	187	0.588235	0	0	0	0	0	0
ENSMUSG00002075449			Y	110	0.618182	0	0	0	0	0	0
ENSMUSG00002076543			2	294	0.455782	0	0	0	0	0	0
ENSMUSG00000095779		novel pseudogene	4	1897	0.524512	0	0	0	0	0	0
ENSMUSG00002075816			19	70	0.6	0	0	0	0	0	0
ENSMUSG00002075453			11	216	0.527778	0	0	0	0	0	0
ENSMUSG00002075454			4	107	0.551402	0	0	0	0	0	1
ENSMUSG00002075455			17	110	0.618182	0	0	0	0	0	0
ENSMUSG00002075456			4	83	0.493976	0	0	0	0	7	0
ENSMUSG00002075821			12	135	0.474074	3	0	0	0	0	0
ENSMUSG00002075458			1	94	0.478723	0	0	0	0	0	0
ENSMUSG00002075459			8	97	0.402062	0	0	0	0	0	0
ENSMUSG00002075460			12	70	0.514286	0	0	0	0	0	0
ENSMUSG00002075825			X	68	0.514706	0	0	0	0	0	0
ENSMUSG00002075462			3	92	0.532609	0	0	0	0	0	0
ENSMUSG00002075099			13	119	0.546218	2	0	0	0	0	0
ENSMUSG00002075464			9	84	0.488095	0	0	0	0	0	0
ENSMUSG00002075465			15	62	0.66129	0	0	0	0	0	0
ENSMUSG00002076923			15	95	0.915789	0	0	0	0	0	0
ENSMUSG00002076560			2	124	0.290323	0	0	0	0	0	0
ENSMUSG00002075468			3	110	0.618182	0	0	0	0	0	0
ENSMUSG00002076562			12	109	0.577982	0	0	0	0	0	0
ENSMUSG00002076927			9	67	0.402985	0	0	0	0	0	0
ENSMUSG00002076564			5	76	0.644737	0	0	0	0	0	0
ENSMUSG00002075472			2	150	0.293333	0	0	0	0	0	0
ENSMUSG00002075473			16	110	0.581818	0	0	0	0	0	0
ENSMUSG00002076930			11	104	0.538462	0	0	0	0	0	0
ENSMUSG00002075475			5	138	0.565217	0	0	0	0	0	0
ENSMUSG00002075840			3	108	0.453704	0	0	0	0	0	0
ENSMUSG00002075477			4	110	0.627273	0	0	0	0	0	0
ENSMUSG00002075478			19	99	0.424242	0	0	0	0	0	0
ENSMUSG00002075479			4	72	0.486111	0	15	4	8	0	1
ENSMUSG00002075844			15	129	0.534884	0	0	0	0	0	0
ENSMUSG00002076574			12	63	0.31746	2	6	3	1	0	0
ENSMUSG00002075482			19	64	0.5625	0	0	0	0	0	0
ENSMUSG00002076576			17	61	0.491803	0	0	0	0	0	0
ENSMUSG00002075484			12	76	0.486842	0	0	0	0	0	0
ENSMUSG00002075485			4	77	0.571429	0	0	0	0	0	0
ENSMUSG00002075486			17	110	0.318182	0	1	1	0	0	0
ENSMUSG00002076580			2	92	0.358696	0	0	0	0	0	0
ENSMUSG00002075488			5	67	0.402985	4	0	1	0	0	0
ENSMUSG00002075489			4	110	0.418182	0	0	0	0	0	0
ENSMUSG00000110849		olfactory receptor 1545, pseudogene 1	9	375	0.410667	0	0	0	0	0	0
ENSMUSG00002075491			15	70	0.357143	0	0	0	0	0	0
ENSMUSG00002076585			2	126	0.404762	0	0	0	0	0	0
ENSMUSG00002075493			X	106	0.650943	0	0	0	0	0	0
ENSMUSG00002076951			5	77	0.532468	0	0	0	1	0	0
ENSMUSG00002076588			18	101	0.49505	0	0	0	0	0	0
ENSMUSG00002076589			1	101	0.50495	0	0	0	0	0	0
ENSMUSG00002075497			16	102	0.558824	0	0	0	0	0	0
ENSMUSG00002076591			3	110	0.581818	0	0	0	0	0	0
ENSMUSG00000115423		novel protein	2	944	0.474576	0	0	0	0	0	0
ENSMUSG00002075500			11	90	0.566667	0	0	0	0	0	0
ENSMUSG00002075501			1	56	0.714286	0	1	1	2	1	3
ENSMUSG00002075502			3	111	0.405405	0	0	0	0	0	0
ENSMUSG00002076596			12	136	0.485294	0	0	0	0	0	0
ENSMUSG00002076597			1	109	0.577982	0	0	0	0	0	0
ENSMUSG00002076598			7	123	0.390244	0	0	0	0	0	0
ENSMUSG00002075870			12	96	0.395833	0	0	0	0	0	1
ENSMUSG00002076964			11	136	0.536765	0	0	0	0	0	0
ENSMUSG00002075508			4	133	0.511278	0	0	0	0	0	0
ENSMUSG00002076602			5	93	0.354839	0	0	0	0	0	0
ENSMUSG00000111302		olfactory receptor 1236, pseudogene 1	2	509	0.365422	0	0	0	0	0	0
ENSMUSG00002075511			5	179	0.625698	0	0	0	0	0	0
ENSMUSG00002076605			13	121	0.495868	0	0	0	0	0	0
ENSMUSG00000118960			3	130	0.484615	0	0	0	0	0	0
ENSMUSG00002075514			4	88	0.431818	0	0	0	0	0	0
ENSMUSG00002075515			6	95	0.463158	0	0	0	0	0	0
ENSMUSG00002075516			11	93	0.591398	0	0	0	0	0	0
ENSMUSG00002076610			12	110	0.563636	0	0	0	0	0	0
ENSMUSG00002075518			2	96	0.583333	0	0	0	0	0	0
ENSMUSG00002075519			4	120	0.416667	0	0	0	0	0	0
ENSMUSG00002075520			4	91	0.681319	0	0	0	0	0	0
ENSMUSG00002076614			9	91	0.461538	0	0	0	0	0	0
ENSMUSG00002075522			11	84	0.321429	0	0	0	0	0	0
ENSMUSG00002075523			8	82	0.439024	0	0	0	0	0	0
ENSMUSG00002075524			9	57	0.736842	66	92	82	157	60	64
ENSMUSG00002076617			2	121	0.38843	0	0	0	0	0	0
ENSMUSG00002075526			16	113	0.460177	0	0	0	0	0	0
ENSMUSG00002075527			1	101	0.485149	0	0	0	0	0	0
ENSMUSG00002075528			2	67	0.716418	0	0	0	0	0	0
ENSMUSG00002076622			5	110	0.3	0	0	0	0	0	0
ENSMUSG00002075894			12	119	0.151261	0	0	0	0	0	0
ENSMUSG00002075531			1	121	0.512397	0	0	0	0	0	0
ENSMUSG00002075532			16	88	0.306818	0	0	0	0	0	0
ENSMUSG00002075533			6	73	0.671233	0	0	0	0	0	0
ENSMUSG00002075898			11	117	0.247863	0	0	0	0	0	0
ENSMUSG00002075535			7	125	0.56	0	0	0	0	0	0
ENSMUSG00002075536			7	91	0.505495	0	0	0	0	0	0
ENSMUSG00002075537			4	85	0.858824	0	0	0	0	0	0
ENSMUSG00002075538			14	117	0.273504	0	0	0	0	0	0
ENSMUSG00000118029		TEC	19	2090	0.57177	0	1	1	0	0	0
ENSMUSG00002075904			13	142	0.661972	0	0	0	0	0	0
ENSMUSG00002075541			2	127	0.377953	0	0	0	0	0	0
ENSMUSG00002076635			3	121	0.495868	0	0	0	1	0	0
ENSMUSG00002075907			8	90	0.833333	0	0	0	0	0	0
ENSMUSG00002075544			7	66	0.333333	0	0	0	1	0	0
ENSMUSG00002075545			1	77	0.532468	0	6	0	0	3	0
ENSMUSG00002075546			12	104	0.557692	0	0	0	0	0	0
ENSMUSG00002075547			4	64	0.609375	0	0	0	0	0	0
ENSMUSG00002076641			X	85	0.376471	0	0	0	0	0	0
ENSMUSG00002076642			7	121	0.479339	0	0	0	0	0	0
ENSMUSG00002075914			12	78	0.666667	0	0	0	0	0	0
ENSMUSG00002075551			13	57	0.719298	0	0	1	1	0	0
ENSMUSG00002075552			1	105	0.485714	0	0	0	0	0	0
ENSMUSG00002075553			4	110	0.372727	0	0	0	0	0	0
ENSMUSG00002075554			8	131	0.465649	0	0	0	0	0	0
ENSMUSG00002075555			8	80	0.5125	0	0	0	0	0	0
ENSMUSG00002075556			2	84	0.345238	0	0	0	0	0	0
ENSMUSG00002075436			15	77	0.493506	0	0	0	0	0	0
ENSMUSG00002076651			12	207	0.347826	0	0	0	0	0	0
ENSMUSG00000119928			12	132	0.5	0	0	0	0	0	0
ENSMUSG00002075560			X	86	0.395349	0	0	0	0	0	0
ENSMUSG00000119930			5	123	0.487805	0	0	0	0	0	0
ENSMUSG00002075562			9	127	0.385827	0	0	0	0	0	0
ENSMUSG00002075927			6	112	0.589286	0	0	0	0	0	0
ENSMUSG00002075928			6	114	0.333333	0	0	0	0	0	0
ENSMUSG00002075565			4	102	0.5	0	0	0	0	0	0
ENSMUSG00002075566			9	82	0.47561	0	0	0	0	0	0
ENSMUSG00002075931			11	216	0.527778	0	0	0	0	0	0
ENSMUSG00002076661			1	84	0.47619	0	0	0	0	0	0
ENSMUSG00000119398			17	88	0.443182	0	0	0	0	0	0
ENSMUSG00002076663			17	126	0.571429	0	0	0	0	0	0
ENSMUSG00002075571			16	110	0.618182	0	0	0	0	0	0
ENSMUSG00002076665			15	173	0.624277	0	0	0	0	0	0
ENSMUSG00002075573			12	86	0.546512	0	0	0	0	0	0
ENSMUSG00002076666			11	138	0.586957	0	0	0	0	0	0
ENSMUSG00002075575			18	110	0.554545	0	0	1	0	0	0
ENSMUSG00002075576			11	101	0.445545	0	0	0	0	0	0
ENSMUSG00002076669			1	154	0.5	0	0	0	0	0	0
ENSMUSG00002075942			8	91	0.307692	0	0	0	0	0	0
ENSMUSG00002075579			11	66	0.30303	0	0	0	0	0	0
ENSMUSG00002075580			6	143	0.447552	0	0	0	0	0	0
ENSMUSG00002075581			3	106	0.396226	0	0	0	0	0	0
ENSMUSG00000119417			19	50	0.42	0	0	0	0	0	0
ENSMUSG00002075583			1	143	0.517483	0	0	0	0	0	0
ENSMUSG00002075584			8	130	0.446154	0	0	0	0	0	0
ENSMUSG00002075949			X	137	0.430657	0	0	0	0	0	0
ENSMUSG00002076679			15	116	0.189655	0	0	0	0	0	0
ENSMUSG00002075951			5	83	0.457831	0	0	0	0	3	0
ENSMUSG00000119432			9	72	0.402778	0	0	0	0	0	0
ENSMUSG00002076682			9	59	0.627119	0	0	0	0	0	0
ENSMUSG00002075590			15	69	0.463768	0	0	0	0	0	0
ENSMUSG00002075591			12	142	0.415493	0	0	0	0	0	0
ENSMUSG00002075592			8	60	0.666667	0	0	0	0	0	0
ENSMUSG00002076686			2	126	0.380952	0	0	0	0	0	0
ENSMUSG00002075958			8	127	0.464567	0	0	0	0	0	0
ENSMUSG00002076808			3	120	0.491667	0	0	0	0	0	0
ENSMUSG00002075596			12	110	0.572727	0	0	0	0	0	0
ENSMUSG00002075597			13	138	0.666667	0	0	0	0	0	0
ENSMUSG00002075598			10	203	0.448276	0	0	0	0	0	0
ENSMUSG00002075599			17	100	0.51	0	0	0	0	0	0
ENSMUSG00002076692			8	110	0.618182	0	0	0	0	0	0
ENSMUSG00002074870			7	96	0.510417	0	0	0	0	0	0
ENSMUSG00002075602			19	87	0.862069	0	0	1	0	0	0
ENSMUSG00002075603			17	117	0.641026	2	0	0	0	0	0
ENSMUSG00002076697			3	138	0.637681	0	0	0	0	0	0
ENSMUSG00002075605			13	129	0.457364	0	0	0	0	0	0
ENSMUSG00002075606			X	64	0.421875	0	0	0	0	0	0
ENSMUSG00002075607			14	256	0.386719	0	0	0	0	0	0
ENSMUSG00002075608			6	95	0.442105	0	0	0	0	4	0
ENSMUSG00002076702			5	74	0.567568	0	0	0	0	0	0
ENSMUSG00002075610			11	71	0.422535	0	0	0	0	0	0
ENSMUSG00002075611			1	93	0.483871	0	0	0	0	0	0
ENSMUSG00002076705			8	109	0.633028	0	0	0	0	0	0
ENSMUSG00000119468			13	132	0.469697	0	0	0	0	0	0
ENSMUSG00000079190			GL456211.1	1473	0.492193	0	0	0	0	0	0
ENSMUSG00000079192			GL456210.1	255	0.466667	0	0	0	0	0	0
ENSMUSG00000118106		TEC	19	2276	0.52065	0	0	0	0	5	2
ENSMUSG00002075617			14	112	0.178571	0	0	0	0	0	0
ENSMUSG00002075618			13	66	0.333333	0	0	0	0	0	0
ENSMUSG00002075983			12	70	0.7	0	0	0	0	0	0
ENSMUSG00002075984			19	121	0.495868	0	2	0	6	0	0
ENSMUSG00002075621			12	87	0.551724	0	0	0	0	0	0
ENSMUSG00002075622			9	107	0.672897	0	0	0	0	0	0
ENSMUSG00002075623			19	109	0.577982	0	0	0	0	0	0
ENSMUSG00000119486			2	132	0.44697	0	0	0	0	0	0
ENSMUSG00002075625			6	70	0.7	0	0	0	0	0	0
ENSMUSG00002075626			7	107	0.663551	0	0	0	0	0	0
ENSMUSG00002075627			17	116	0.275862	0	0	0	0	0	0
ENSMUSG00002075628			1	85	0.2	0	0	0	0	0	0
ENSMUSG00002075993			13	107	0.672897	0	0	0	0	0	0
ENSMUSG00002075994			19	107	0.654206	0	0	0	0	0	0
ENSMUSG00002075631			2	126	0.380952	0	0	0	0	0	0
ENSMUSG00002075996			7	84	0.488095	0	0	0	0	0	0
ENSMUSG00002076726			13	109	0.59633	0	0	0	0	0	0
ENSMUSG00002076483			5	101	0.50495	0	0	0	0	0	0
ENSMUSG00002075756			9	97	0.453608	0	0	0	0	0	0
ENSMUSG00002076729			X	86	0.395349	0	0	0	0	0	0
ENSMUSG00002076730			17	223	0.632287	0	4	0	0	1	1
ENSMUSG00002076731			2	79	0.506329	3	0	3	0	0	1
ENSMUSG00002075639			X	97	0.639175	0	0	0	0	0	0
ENSMUSG00000118969			6	132	0.469697	0	0	0	0	0	0
ENSMUSG00002075641			7	110	0.590909	0	0	0	0	0	0
ENSMUSG00002075763			13	101	0.49505	0	0	0	0	0	0
ENSMUSG00002076128			15	95	0.242105	0	0	0	0	0	0
ENSMUSG00002076372			15	52	0.596154	0	0	0	0	0	0
ENSMUSG00000095672			GL456211.1	366	0.486339	0	0	0	0	0	0
ENSMUSG00002076010			X	93	0.537634	0	0	0	0	0	0
ENSMUSG00002075647			2	96	0.53125	1	0	0	0	0	0
ENSMUSG00002076012			6	90	0.388889	0	0	0	0	0	0
ENSMUSG00002076377			7	109	0.651376	0	0	0	0	0	0
ENSMUSG00002075650			1	112	0.151786	0	0	0	0	0	0
ENSMUSG00002076743			2	125	0.576	0	0	0	0	0	0
ENSMUSG00002075652			17	121	0.495868	0	0	0	0	0	0
ENSMUSG00002075653			6	121	0.479339	0	0	0	0	0	0
ENSMUSG00002076382			16	73	0.547945	8	0	6	1	2	0
ENSMUSG00002076383			9	86	0.604651	0	0	0	0	0	0
ENSMUSG00000119532			X	143	0.482517	0	0	0	0	0	0
ENSMUSG00002076021			6	233	0.313305	0	0	0	0	0	0
ENSMUSG00000113373		novel protein	5	138	0.478261	0	0	0	0	0	0
ENSMUSG00002076752			1	112	0.598214	0	0	0	0	0	0
ENSMUSG00002075660			12	70	0.657143	0	0	0	0	0	0
ENSMUSG00002075661			4	65	0.876923	0	0	0	0	0	0
ENSMUSG00002075662			6	177	0.40678	1	2	0	0	0	0
ENSMUSG00002076027			X	110	0.454545	0	0	0	0	0	0
ENSMUSG00002075664			5	160	0.6875	0	0	0	0	0	0
ENSMUSG00002075665			6	146	0.486301	0	0	0	0	0	0
ENSMUSG00002075787			18	113	0.60177	0	0	0	0	0	0
ENSMUSG00002075667			9	84	0.416667	0	0	0	0	0	0
ENSMUSG00002075668			2	121	0.421488	0	0	0	0	0	0
ENSMUSG00002076762			10	122	0.52459	0	0	0	0	0	0
ENSMUSG00002075670			16	108	0.657407	0	0	0	0	0	0
ENSMUSG00002076399			2	260	0.334615	0	0	0	0	0	0
ENSMUSG00002075672			16	124	0.516129	8	0	0	0	3	0
ENSMUSG00002076765			2	94	0.255319	0	0	0	0	0	0
ENSMUSG00002076767			X	80	0.55	0	0	0	0	0	0
ENSMUSG00002075675			13	138	0.666667	0	0	0	0	0	0
ENSMUSG00002075676			12	80	0.575	0	0	0	0	0	0
ENSMUSG00002076041			X	106	0.650943	0	0	0	0	0	0
ENSMUSG00002076406			19	106	0.424528	0	0	0	0	1	0
ENSMUSG00002075679			6	93	0.903226	1	2	6	3	3	2
ENSMUSG00002075680			11	109	0.633028	0	0	0	0	0	0
ENSMUSG00002076409			14	113	0.39823	0	0	0	0	0	0
ENSMUSG00002076410			12	65	0.338462	0	0	0	0	0	0
ENSMUSG00002076411			6	102	0.5	0	0	0	0	0	0
ENSMUSG00002075684			10	83	0.39759	0	0	0	0	0	0
ENSMUSG00002075685			11	147	0.353741	0	0	0	0	0	0
ENSMUSG00002076778			2	129	0.426357	0	0	0	0	0	0
ENSMUSG00000119577			8	144	0.527778	0	0	0	1	1	0
ENSMUSG00002076416			2	83	0.313253	0	0	0	0	0	0
ENSMUSG00002076295			10	83	0.662651	0	5	0	0	0	0
ENSMUSG00002075690			12	61	0.540984	0	0	0	0	0	0
ENSMUSG00000096236			JH584297.1	1221	0.481572	0	0	0	0	0	0
ENSMUSG00002075692			4	66	0.333333	0	0	0	0	0	0
ENSMUSG00002075329			15	124	0.403226	0	0	0	0	0	0
ENSMUSG00002075694			8	110	0.581818	0	0	0	0	0	0
ENSMUSG00002076423			X	121	0.61157	0	0	0	0	0	0
ENSMUSG00002075696			4	120	0.566667	0	0	0	0	0	0
ENSMUSG00002076790			9	104	0.596154	0	0	0	0	0	0
ENSMUSG00002076791			1	78	0.576923	0	0	0	0	0	0
ENSMUSG00000095570			GL456354.1	1443	0.471933	0	0	0	0	0	0
ENSMUSG00002075700			X	121	0.495868	0	0	0	0	0	0
ENSMUSG00002076065			5	70	0.314286	0	0	0	0	0	0
ENSMUSG00002076795			8	199	0.341709	0	0	0	0	0	0
ENSMUSG00002075703			8	101	0.49505	0	0	0	0	0	0
ENSMUSG00002075704			14	107	0.242991	0	0	0	0	0	0
ENSMUSG00002076798			19	116	0.413793	0	0	0	0	0	0
ENSMUSG00002076070			9	110	0.627273	0	0	0	0	0	0
ENSMUSG00002076800			2	110	0.618182	0	0	0	0	0	0
ENSMUSG00002075708			14	80	0.575	0	0	0	0	0	0
ENSMUSG00002075709			5	135	0.659259	0	0	0	0	0	0
ENSMUSG00002075710			2	77	0.454545	8	17	4	6	3	10
ENSMUSG00002075711			13	138	0.666667	0	0	0	1	0	0
ENSMUSG00002075712			5	101	0.50495	0	0	0	0	0	0
ENSMUSG00002075713			8	114	0.640351	0	0	1	0	1	0
ENSMUSG00002075714			13	124	0.564516	0	0	0	0	0	0
ENSMUSG00002076079			19	109	0.458716	0	0	0	0	0	0
ENSMUSG00002075837			Y	99	0.333333	0	0	0	0	0	0
ENSMUSG00002076445			13	141	0.673759	2	4	0	1	0	1
ENSMUSG00002076811			4	125	0.464	0	0	0	0	0	0
ENSMUSG00002075719			10	85	0.505882	0	0	0	0	0	0
ENSMUSG00002076813			1	100	0.49	0	0	0	0	0	0
ENSMUSG00002075721			X	107	0.663551	0	0	0	0	0	0
ENSMUSG00000117102		Novel transcript	17	3039	0.455742	0	0	0	0	0	0
ENSMUSG00002075723			4	90	0.4	0	0	0	0	0	0
ENSMUSG00002075724			1	121	0.495868	0	0	0	0	0	0
ENSMUSG00002075725			7	110	0.572727	0	0	0	0	0	0
ENSMUSG00002075847			1	121	0.495868	0	0	0	0	0	0
ENSMUSG00000119643			7	90	0.633333	0	0	0	0	0	0
ENSMUSG00002075728			3	91	0.307692	0	0	0	0	0	0
ENSMUSG00002075729			GL456385.1	100	0.5	0	0	0	0	0	0
ENSMUSG00002076094			4	101	0.514851	0	0	0	0	0	0
ENSMUSG00002075731			10	76	0.447368	0	0	0	0	0	0
ENSMUSG00002076825			13	108	0.546296	0	0	0	0	0	0
ENSMUSG00002075733			17	145	0.689655	0	0	0	0	0	0
ENSMUSG00002075855			7	224	0.357143	0	0	0	0	0	0
ENSMUSG00002076828			2	96	0.59375	0	0	0	0	0	0
ENSMUSG00002076464			17	323	0.674923	7	3	5	4	8	0
ENSMUSG00002075737			5	110	0.618182	0	0	3	2	2	0
ENSMUSG00002075738			2	124	0.33871	0	0	0	0	0	0
ENSMUSG00002076832			4	89	0.876404	0	0	0	0	0	0
ENSMUSG00002075740			6	110	0.554545	0	0	0	0	0	0
ENSMUSG00002075741			6	112	0.339286	2	3	0	0	0	3
ENSMUSG00002076835			2	120	0.416667	0	0	0	0	0	0
ENSMUSG00002075743			6	110	0.554545	0	0	0	0	0	0
ENSMUSG00002075744			X	86	0.406977	0	0	0	0	0	0
ENSMUSG00002075866			12	66	0.333333	0	0	0	0	0	0
ENSMUSG00002075746			13	255	0.517647	0	0	0	0	0	0
ENSMUSG00002075747			4	96	0.479167	0	0	0	0	0	0
ENSMUSG00002075748			2	102	0.5	0	0	0	0	0	0
ENSMUSG00002076477			1	116	0.465517	0	0	0	0	0	0
ENSMUSG00002076843			16	70	0.6	0	0	0	0	0	0
ENSMUSG00002075751			3	112	0.696429	0	0	0	0	0	0
ENSMUSG00002076845			14	66	0.318182	0	0	0	0	0	0
ENSMUSG00002075753			15	107	0.691589	0	0	0	0	0	0
ENSMUSG00002076847			11	88	0.363636	0	0	0	0	0	0
ENSMUSG00002076969			4	77	0.467532	0	0	0	0	0	0
ENSMUSG00002075877			13	84	0.47619	0	0	0	0	0	0
ENSMUSG00002076121			7	71	0.690141	0	2	0	0	0	0
ENSMUSG00002075758			X	122	0.606557	0	0	0	0	0	0
ENSMUSG00002075759			14	121	0.495868	0	0	0	0	0	0
ENSMUSG00002075760			11	105	0.695238	0	0	0	0	0	0
ENSMUSG00002075761			6	139	0.532374	18	1	4	1	8	0
ENSMUSG00002076855			2	53	0.679245	0	0	1	0	0	0
ENSMUSG00002076248			11	77	0.545455	0	0	0	0	0	0
ENSMUSG00002076978			18	90	0.433333	3	0	0	0	0	0
ENSMUSG00002075765			9	118	0.525424	7	0	0	0	0	0
ENSMUSG00002076980			2	127	0.393701	0	0	0	0	0	0
ENSMUSG00000118632		component of Sp100-rs (Csprs) pseudogene	1	355	0.433803	0	0	0	0	0	0
ENSMUSG00000119513			8	92	0.347826	0	0	0	0	0	0
ENSMUSG00002075890			11	138	0.652174	2	11	0	8	6	2
ENSMUSG00002075770			4	591	0.563452	0	0	0	0	0	0
ENSMUSG00002075771			8	68	0.426471	0	0	0	0	0	0
ENSMUSG00000119713			9	132	0.454545	0	0	0	0	0	0
ENSMUSG00002075773			15	138	0.557971	0	0	0	0	0	0
ENSMUSG00002075774			18	110	0.563636	0	0	0	0	0	0
ENSMUSG00002075775			6	110	0.627273	0	0	0	0	0	0
ENSMUSG00002076869			2	120	0.4	0	0	0	0	0	0
ENSMUSG00002075777			18	71	0.549296	0	0	0	0	0	0
ENSMUSG00002076871			15	114	0.508772	0	0	0	0	0	0
ENSMUSG00002075779			9	129	0.403101	0	4	0	0	0	0
ENSMUSG00000118646			10	383	0.584856	0	0	0	0	2	0
ENSMUSG00002075781			6	125	0.576	0	0	0	0	0	0
ENSMUSG00002076875			10	126	0.507937	0	0	0	0	0	0
ENSMUSG00002076876			4	126	0.579365	0	0	0	0	0	0
ENSMUSG00002076148			11	126	0.396825	0	0	0	0	0	0
ENSMUSG00002075785			8	121	0.495868	0	0	0	0	0	0
ENSMUSG00002076879			9	67	0.432836	0	0	0	0	0	0
ENSMUSG00002075908			9	126	0.555556	6	0	0	0	0	0
ENSMUSG00002076152			11	70	0.614286	0	0	0	0	3	0
ENSMUSG00000118656		olfactory receptor, family 13, subfamily H, member 1 (OR13H1) pseudogene	X	87	0.413793	0	0	0	0	0	0
ENSMUSG00002075790			10	101	0.465347	0	0	0	0	0	0
ENSMUSG00000118658		SNW domain containing 1 (Snw1) pseudogene	12	166	0.403614	0	0	0	0	0	0
ENSMUSG00002075792			7	110	0.563636	0	0	0	0	0	0
ENSMUSG00002076886			3	86	0.27907	0	0	0	0	0	0
ENSMUSG00002075794			19	110	0.536364	0	0	0	0	0	0
ENSMUSG00000095742			JH584295.1	243	0.703704	1	13	10	4	16	5
ENSMUSG00002076524			16	110	0.627273	0	0	0	0	0	0
ENSMUSG00000110033		olfactory receptor 1527, pseudogene 1	7	939	0.450479	0	0	0	0	0	0
ENSMUSG00002076162			13	138	0.666667	0	1	0	0	0	0
ENSMUSG00002075799			5	99	0.474747	0	0	0	0	0	0
ENSMUSG00002076892			10	101	0.49505	0	0	0	0	0	0
ENSMUSG00002076894			5	137	0.532847	0	0	0	0	0	0
ENSMUSG00000095076			JH584298.1	1215	0.469136	0	0	0	0	0	0
ENSMUSG00002075803			2	92	0.434783	0	0	0	0	0	0
ENSMUSG00002076168			10	110	0.581818	0	0	0	0	0	0
ENSMUSG00002075805			6	110	0.6	0	0	0	0	0	0
ENSMUSG00002076899			X	96	0.510417	0	0	0	0	0	0
ENSMUSG00002075807			10	110	0.609091	0	0	0	0	0	0
ENSMUSG00002075808			9	141	0.680851	0	5	4	0	0	0
ENSMUSG00002076537			18	166	0.355422	0	0	0	0	0	0
ENSMUSG00002076901			X	102	0.5	0	0	0	0	0	0
ENSMUSG00002076904			2	126	0.587302	0	0	0	0	0	0
ENSMUSG00002075812			2	100	0.44	0	0	0	0	0	0
ENSMUSG00002075813			19	124	0.16129	0	0	0	0	0	0
ENSMUSG00002075814			13	108	0.564815	0	0	0	0	0	0
ENSMUSG00002076907			13	138	0.666667	0	0	0	0	0	3
ENSMUSG00002076544			1	101	0.49505	0	0	0	0	0	0
ENSMUSG00002075817			4	125	0.592	0	0	0	0	0	0
ENSMUSG00002075818			X	134	0.365672	0	0	0	0	0	0
ENSMUSG00002075819			1	100	0.51	0	0	0	0	0	0
ENSMUSG00002075820			3	74	0.567568	0	0	0	0	0	0
ENSMUSG00002076185			3	101	0.49505	0	0	0	0	0	0
ENSMUSG00002075822			6	78	0.512821	4	0	0	0	0	0
ENSMUSG00002076916			10	133	0.646617	0	0	0	0	0	0
ENSMUSG00002076917			2	100	0.38	0	0	0	0	0	0
ENSMUSG00000118703			6	132	0.469697	0	0	0	0	0	0
ENSMUSG00002076919			10	94	0.595745	0	0	0	0	0	0
ENSMUSG00002075463			2	87	0.482759	16	38	21	14	13	5
ENSMUSG00002075828			8	109	0.559633	0	0	0	0	0	0
ENSMUSG00002076922			5	97	0.628866	0	0	0	0	0	0
ENSMUSG00000119612			12	132	0.507576	0	0	0	0	0	0
ENSMUSG00002075831			X	104	0.375	0	0	0	0	0	0
ENSMUSG00002076925			15	101	0.49505	0	0	0	0	0	0
ENSMUSG00002075833			4	138	0.485507	0	0	0	0	0	0
ENSMUSG00002076926			7	110	0.572727	0	0	0	0	0	0
ENSMUSG00002075835			15	71	0.535211	0	0	0	0	0	0
ENSMUSG00002075836			3	108	0.509259	0	0	0	0	0	0
ENSMUSG00002076443			16	125	0.592	9	0	0	0	0	0
ENSMUSG00000107399		olfactory receptor 1544, pseudogene 1	10	944	0.416314	0	0	0	0	0	0
ENSMUSG00002075839			1	132	0.363636	0	0	0	0	0	0
ENSMUSG00002076568			2	91	0.384615	0	0	0	0	0	0
ENSMUSG00002075841			5	105	0.514286	0	0	0	0	0	0
ENSMUSG00002075842			1	121	0.413223	0	0	0	0	0	0
ENSMUSG00002076936			14	119	0.294118	0	0	0	0	0	0
ENSMUSG00000094474			JH584299.1	1446	0.464039	0	0	0	0	0	0
ENSMUSG00002075845			X	107	0.654206	0	0	0	0	0	0
ENSMUSG00002075846			15	98	0.428571	0	0	0	0	0	0
ENSMUSG00002075968			6	126	0.555556	0	0	0	0	0	0
ENSMUSG00002075848			6	97	0.525773	15	0	1	4	1	0
ENSMUSG00002075849			5	92	0.521739	0	0	0	0	0	0
ENSMUSG00002075850			Y	110	0.618182	0	0	0	0	0	0
ENSMUSG00002075851			19	89	0.831461	0	0	1	6	0	0
ENSMUSG00002076945			17	272	0.584559	5	0	0	0	0	0
ENSMUSG00002076946			10	68	0.338235	0	0	0	0	0	0
ENSMUSG00002075854			16	110	0.290909	0	0	0	0	0	0
ENSMUSG00002075976			7	80	0.475	0	0	0	0	0	0
ENSMUSG00002075856			3	121	0.495868	0	0	0	0	0	0
ENSMUSG00002075857			8	202	0.529703	0	0	0	0	0	0
ENSMUSG00002076222			18	94	0.265957	0	0	0	0	0	0
ENSMUSG00000118748			11	132	0.515152	0	0	0	0	0	0
ENSMUSG00002075860			7	69	0.478261	0	0	0	0	0	0
ENSMUSG00002075861			11	67	0.641791	0	0	0	0	2	0
ENSMUSG00002075862			7	110	0.627273	0	0	0	0	0	0
ENSMUSG00002076712			6	147	0.578231	0	0	0	0	0	0
ENSMUSG00000096100			GL456211.1	372	0.497312	0	0	0	0	0	0
ENSMUSG00002075865			2	125	0.576	2	0	2	0	0	0
ENSMUSG00002074892			12	97	0.639175	0	0	0	0	0	0
ENSMUSG00002075867			2	76	0.434211	0	0	0	0	0	0
ENSMUSG00002074894			11	126	0.555556	0	0	0	0	0	0
ENSMUSG00002076962			1	84	0.488095	0	0	0	0	0	0
ENSMUSG00000115801		novel transcript	14	93147	0.408183	1	1	0	0	0	3
ENSMUSG00000118364		TEC	19	1757	0.480364	0	0	0	0	0	0
ENSMUSG00002075872			3	84	0.380952	0	0	0	0	0	0
ENSMUSG00002076966			X	127	0.409449	0	0	0	0	0	0
ENSMUSG00002076238			15	80	0.575	0	0	0	0	0	0
ENSMUSG00002076968			11	112	0.589286	0	0	0	0	0	0
ENSMUSG00002076361			9	97	0.412371	0	0	0	0	0	0
ENSMUSG00000118957			X	114	0.429825	0	0	0	0	0	0
ENSMUSG00002075878			2	124	0.290323	0	0	0	0	0	0
ENSMUSG00002076972			X	86	0.383721	0	0	0	0	0	0
ENSMUSG00002075880			10	67	0.402985	0	0	0	0	0	0
ENSMUSG00002075881			4	126	0.571429	0	0	0	0	0	0
ENSMUSG00002075882			12	76	0.657895	0	0	0	0	0	0
ENSMUSG00002076976			15	91	0.494505	0	0	0	0	0	0
ENSMUSG00002076005			5	68	0.764706	0	0	0	0	0	0
ENSMUSG00002076127			2	122	0.295082	0	0	0	0	0	0
ENSMUSG00002075886			6	147	0.312925	0	0	0	0	0	0
ENSMUSG00002076857			1	100	0.27	0	0	0	0	0	0
ENSMUSG00002075888			2	189	0.677249	0	0	0	0	0	0
ENSMUSG00002076859			15	101	0.49505	4	4	0	1	0	0
ENSMUSG00002076375			16	163	0.429448	0	0	0	0	0	0
ENSMUSG00002075891			19	77	0.506494	0	0	0	0	0	0
ENSMUSG00002076985			7	121	0.479339	0	0	0	0	0	0
ENSMUSG00002075893			18	121	0.495868	0	0	0	0	0	0
ENSMUSG00002076986			15	127	0.354331	0	0	0	0	0	0
ENSMUSG00002075895			16	89	0.865169	0	0	0	0	0	0
ENSMUSG00002075896			3	103	0.883495	0	0	0	0	0	0
ENSMUSG00002075897			7	102	0.558824	0	0	0	0	0	0
ENSMUSG00002076626			19	86	0.290698	0	0	0	0	0	0
ENSMUSG00002075899			19	82	0.695122	0	0	0	0	0	0
ENSMUSG00002075900			18	121	0.404959	0	0	0	0	0	0
ENSMUSG00002075901			7	110	0.627273	0	0	0	0	0	0
ENSMUSG00002075902			10	125	0.608	0	0	0	0	0	0
ENSMUSG00000111339		post-GPI attachment to proteins 2	7	606	0.542904	0	0	0	0	0	0
ENSMUSG00000118820			6	132	0.469697	0	0	0	0	0	0
ENSMUSG00002075905			12	137	0.49635	0	0	0	0	0	0
ENSMUSG00002075906			8	86	0.918605	0	0	0	0	0	0
ENSMUSG00000119358			2	136	0.441176	0	0	0	0	0	0
ENSMUSG00000119011			11	144	0.506944	4	4	0	1	2	2
ENSMUSG00002076273			14	105	0.761905	0	0	0	0	0	0
ENSMUSG00002075910			6	194	0.556701	0	0	0	0	0	0
ENSMUSG00002076639			4	110	0.627273	0	0	0	0	0	0
ENSMUSG00002076397			6	120	0.391667	1	0	0	0	0	0
ENSMUSG00002075913			4	83	0.518072	0	0	0	3	0	1
ENSMUSG00002076278			X	92	0.380435	0	0	0	0	0	0
ENSMUSG00002075915			12	109	0.568807	0	0	0	0	0	0
ENSMUSG00002075916			5	81	0.37037	0	0	0	0	0	0
ENSMUSG00002075917			4	91	0.472527	0	0	0	4	0	2
ENSMUSG00002076646			11	75	0.453333	0	0	0	0	0	0
ENSMUSG00002076283			17	98	0.244898	0	0	0	0	0	0
ENSMUSG00002075920			4	127	0.535433	0	0	0	0	0	0
ENSMUSG00002075193			10	107	0.663551	0	0	0	0	0	0
ENSMUSG00002075922			1	129	0.488372	0	0	0	0	0	0
ENSMUSG00002075557			12	162	0.524691	0	0	0	0	0	0
ENSMUSG00002076652			6	177	0.542373	0	0	0	0	0	0
ENSMUSG00002076289			14	96	0.229167	0	0	0	0	0	0
ENSMUSG00002075926			8	55	0.472727	0	0	0	0	0	0
ENSMUSG00002076655			13	109	0.495413	0	0	0	0	0	0
ENSMUSG00002076292			18	134	0.529851	0	0	0	0	0	0
ENSMUSG00002075929			2	78	0.525641	0	0	0	0	0	0
ENSMUSG00002076294			9	126	0.579365	0	0	0	0	0	0
ENSMUSG00002076658			5	80	0.75	0	0	0	0	0	0
ENSMUSG00002075932			9	108	0.0925926	0	0	0	0	0	0
ENSMUSG00002075933			14	95	0.442105	0	0	0	0	0	0
ENSMUSG00000119763			X	114	0.429825	0	0	0	0	0	0
ENSMUSG00002075935			5	121	0.198347	0	0	0	0	0	0
ENSMUSG00002075936			14	79	0.379747	0	0	0	0	0	0
ENSMUSG00002076301			5	74	0.22973	0	0	0	0	0	0
ENSMUSG00000119588			6	132	0.469697	0	0	0	0	0	0
ENSMUSG00002075939			15	101	0.485149	0	0	0	0	0	0
ENSMUSG00002075940			9	84	0.5	0	0	0	0	0	0
ENSMUSG00001118671			8	92	0.380435	0	0	0	0	0	0
ENSMUSG00002076306			5	95	0.315789	0	0	0	0	0	0
ENSMUSG00002074848			18	96	0.416667	0	0	0	0	0	0
ENSMUSG00002076308			9	107	0.327103	0	0	0	0	0	0
ENSMUSG00002074850			5	117	0.649573	0	0	0	0	0	0
ENSMUSG00002074851			1	53	0.679245	0	0	0	0	0	0
ENSMUSG00002074852			2	167	0.371257	0	0	0	0	0	0
ENSMUSG00002075948			10	263	0.311787	8	2	7	0	0	3
ENSMUSG00002076677			13	114	0.473684	0	0	0	0	0	0
ENSMUSG00002075950			1	77	0.363636	0	0	0	0	0	0
ENSMUSG00002076557			3	106	0.556604	0	0	0	0	0	0
ENSMUSG00002075952			4	96	0.489583	0	0	0	0	1	0
ENSMUSG00002075953			11	69	0.550725	0	0	0	0	0	0
ENSMUSG00002075954			4	95	0.389474	0	0	0	0	0	0
ENSMUSG00002074860			7	121	0.495868	0	0	0	0	0	0
ENSMUSG00002075956			8	75	0.44	0	0	0	0	0	0
ENSMUSG00000118901			12	132	0.484848	0	0	0	0	0	0
ENSMUSG00002074861			5	126	0.626984	0	0	0	0	0	0
ENSMUSG00002076807			2	83	0.373494	0	1	0	0	0	0
ENSMUSG00002075960			2	127	0.433071	0	0	0	0	0	0
ENSMUSG00002074866			7	105	0.542857	0	0	0	0	0	0
ENSMUSG00002076326			11	115	0.6	0	0	0	0	0	0
ENSMUSG00002075963			6	143	0.552448	0	0	0	0	0	0
ENSMUSG00002074868			2	102	0.5	0	0	2	0	0	0
ENSMUSG00002076329			13	144	0.659722	0	0	1	0	1	0
ENSMUSG00000096756			JH584297.1	1446	0.466113	0	0	0	0	0	0
ENSMUSG00002075967			1	110	0.327273	0	0	0	0	0	0
ENSMUSG00002076453			15	60	0.633333	0	0	0	0	0	0
ENSMUSG00002074874			2	67	0.313433	0	0	0	0	0	0
ENSMUSG00002075970			17	81	0.530864	0	0	0	0	0	0
ENSMUSG00002075971			18	84	0.547619	0	0	0	0	0	0
ENSMUSG00002076336			5	111	0.585586	1	0	0	0	0	5
ENSMUSG00002075973			11	80	0.55	0	0	0	0	0	0
ENSMUSG00002074879			11	115	0.313043	0	0	1	0	0	0
ENSMUSG00000119464			8	92	0.380435	0	0	0	0	0	0
ENSMUSG00002076097			2	121	0.471074	0	0	0	0	0	0
ENSMUSG00002075977			X	94	0.542553	0	0	0	0	0	0
ENSMUSG00002075978			15	129	0.534884	0	0	0	0	0	0
ENSMUSG00002075979			7	110	0.609091	0	0	0	0	0	0
ENSMUSG00002075980			1	141	0.64539	0	0	0	0	0	0
ENSMUSG00002075981			16	126	0.603175	0	0	0	0	0	0
ENSMUSG00002075982			8	101	0.267327	0	0	0	0	0	0
ENSMUSG00002076711			17	96	0.677083	2	0	0	0	0	0
ENSMUSG00002076105			1	125	0.576	0	0	0	0	0	0
ENSMUSG00002076470			16	133	0.503759	0	0	0	0	0	0
ENSMUSG00002075986			X	128	0.671875	0	0	0	0	0	0
ENSMUSG00000090395			12	278	0.503597	0	0	0	0	0	0
ENSMUSG00002074893			7	110	0.572727	0	0	0	0	0	0
ENSMUSG00002076110			3	66	0.363636	0	0	0	0	0	0
ENSMUSG00002075990			2	143	0.594406	0	0	0	0	0	0
ENSMUSG00002075991			19	132	0.333333	0	0	0	0	0	0
ENSMUSG00002075992			1	110	0.554545	0	0	0	0	0	0
ENSMUSG00002076357			8	110	0.627273	0	0	0	0	0	0
ENSMUSG00002074898			6	230	0.430435	0	0	0	0	0	0
ENSMUSG00002076359			18	128	0.421875	0	0	0	0	0	0
ENSMUSG00002076724			2	120	0.425	0	0	0	0	6	0
ENSMUSG00002076118			6	97	0.391753	0	0	0	0	0	0
ENSMUSG00000119857			14	132	0.424242	0	0	0	0	0	0
ENSMUSG00002076120			X	110	0.6	0	0	0	0	0	0
ENSMUSG00002076849			2	121	0.396694	0	0	0	0	0	0
ENSMUSG00002076001			12	112	0.294643	0	0	0	0	0	0
ENSMUSG00002076123			3	128	0.453125	0	0	0	0	0	0
ENSMUSG00002076003			9	153	0.163399	0	0	0	0	0	0
ENSMUSG00000095666			JH584296.1	1446	0.465422	0	0	0	0	0	0
ENSMUSG00002076126			13	70	0.442857	0	0	0	0	0	0
ENSMUSG00002076490			10	72	0.333333	0	0	0	0	0	0
ENSMUSG00002076492			15	54	0.666667	0	0	0	0	0	0
ENSMUSG00002076250			12	139	0.460432	0	0	0	0	0	0
ENSMUSG00002076251			15	60	0.633333	0	0	0	0	0	0
ENSMUSG00000119329			X	143	0.475524	0	0	0	0	0	0
ENSMUSG00000119872			3	132	0.492424	0	0	0	0	0	0
ENSMUSG00002076740			9	79	0.493671	0	0	0	0	0	0
ENSMUSG00002076659			X	106	0.669811	0	0	0	0	0	0
ENSMUSG00002076014			2	79	0.468354	0	0	0	0	0	0
ENSMUSG00002076621			3	100	0.28	0	3	0	0	0	0
ENSMUSG00002076016			9	90	0.366667	0	0	0	0	0	0
ENSMUSG00002076017			6	110	0.554545	0	4	0	0	0	0
ENSMUSG00000119525			2	136	0.455882	0	0	0	0	0	0
ENSMUSG00002076140			2	114	0.421053	0	0	0	0	0	0
ENSMUSG00000095500			GL456221.1	291	0.450172	0	0	0	0	0	0
ENSMUSG00002076385			16	84	0.5	0	0	0	0	0	0
ENSMUSG00002076386			3	92	0.413043	0	0	0	0	0	0
ENSMUSG00002076023			6	101	0.49505	0	0	0	0	0	0
ENSMUSG00002076024			11	118	0.491525	5	0	1	0	0	0
ENSMUSG00002076389			17	74	0.554054	7	0	0	7	2	4
ENSMUSG00002076390			7	121	0.495868	0	0	0	0	0	0
ENSMUSG00002076755			6	110	0.509091	0	0	0	0	0	0
ENSMUSG00002076028			8	112	0.142857	0	0	0	0	0	0
ENSMUSG00002076150			7	96	0.4375	0	0	0	0	0	0
ENSMUSG00000118653		ubiquitin-conjugating enzyme E2S (Ube2s) retrogene	9	988	0.574899	2	7	16	11	5	2
ENSMUSG00000118528		novel protein	10	129	0.612403	0	0	0	0	0	0
ENSMUSG00002076517			4	115	0.626087	0	0	0	0	0	0
ENSMUSG00000118657		keratin associated protein 10 like (KRTAP10) pseudogene	4	118	0.59322	0	0	0	0	0	0
ENSMUSG00002076034			17	67	0.656716	0	0	0	0	0	0
ENSMUSG00002076763			19	122	0.557377	0	0	0	0	0	0
ENSMUSG00000118660		novel pseudogene, ortholog of ZNF660	9	990	0.457576	0	0	0	0	0	0
ENSMUSG00000118661		mucin 6, gastric [Source:NCBI gene (formerly Entrezgene);Acc:353328]	7	15593	0.529661	0	0	3	0	1	0
ENSMUSG00002076523			7	121	0.479339	0	0	0	0	0	0
ENSMUSG00002076281			2	170	0.441176	0	0	0	0	0	0
ENSMUSG00002076040			5	132	0.469697	0	0	0	0	0	0
ENSMUSG00002076405			13	249	0.48996	0	0	0	0	0	0
ENSMUSG00002076890			GL456381.1	99	0.505051	0	0	0	0	0	0
ENSMUSG00002076649			15	126	0.309524	0	0	5	0	0	0
ENSMUSG00002076408			15	60	0.616667	0	0	0	0	0	0
ENSMUSG00000119569			X	114	0.403509	0	0	0	0	0	0
ENSMUSG00000094383			JH584299.1	1482	0.469636	0	0	0	0	0	0
ENSMUSG00002076896			11	193	0.544041	0	0	0	0	0	0
ENSMUSG00002076776			6	378	0.5	0	0	0	0	0	0
ENSMUSG00002076049			8	133	0.43609	0	0	0	0	0	0
ENSMUSG00000119932			X	114	0.403509	0	0	0	0	0	0
ENSMUSG00002076172			2	123	0.333333	0	0	0	0	0	0
ENSMUSG00002076900			6	83	0.493976	0	0	0	0	0	0
ENSMUSG00002076093			4	110	0.627273	0	0	0	0	0	0
ENSMUSG00002076054			X	71	0.394366	0	3	0	0	0	0
ENSMUSG00002076297			2	122	0.532787	0	0	0	0	0	0
ENSMUSG00000096244		vomeronasal 1 receptor Vmn1r187 [Source:NCBI gene (formerly Entrezgene);Acc:100039499]	GL456219.1	903	0.433001	0	0	0	0	0	0
ENSMUSG00002076785			2	125	0.576	0	0	0	0	0	0
ENSMUSG00000118555		novel zinc finger pseudogene	7	1816	0.35793	0	3	0	3	7	1
ENSMUSG00002076422			2	124	0.33871	0	0	0	0	0	0
ENSMUSG00002076545			10	193	0.466321	0	0	0	0	0	0
ENSMUSG00002076425			19	109	0.587156	0	0	0	0	0	0
ENSMUSG00002076062			2	95	0.305263	0	0	0	0	0	3
ENSMUSG00002076427			11	173	0.618497	0	0	0	0	0	0
ENSMUSG00002076064			2	95	0.347368	0	0	0	0	0	0
ENSMUSG00002076429			5	96	0.489583	0	0	0	0	0	0
ENSMUSG00000094874			GL456221.1	366	0.483607	0	0	0	0	0	0
ENSMUSG00002076067			8	110	0.609091	0	0	0	0	0	0
ENSMUSG00002076432			8	121	0.479339	0	0	2	0	0	0
ENSMUSG00002076433			14	103	0.417476	0	0	0	0	0	0
ENSMUSG00002076434			16	72	0.569444	0	0	0	0	0	0
ENSMUSG00002076071			9	84	0.261905	0	0	0	0	0	0
ENSMUSG00002076556			11	236	0.504237	0	0	0	0	0	0
ENSMUSG00002076437			2	125	0.584	0	2	1	2	0	0
ENSMUSG00002076074			2	201	0.422886	0	0	0	0	0	0
ENSMUSG00000094887			JH584299.1	2515	0.415507	0	0	0	0	0	0
ENSMUSG00002076197			18	156	0.570513	0	0	0	0	0	0
ENSMUSG00002076441			4	101	0.514851	0	0	0	0	0	0
ENSMUSG00002076806			15	60	0.65	0	0	0	0	0	0
ENSMUSG00000119619			2	136	0.441176	0	0	0	0	0	0
ENSMUSG00002076241			3	110	0.618182	0	0	0	0	0	0
ENSMUSG00002076929			X	169	0.502959	0	0	0	0	0	0
ENSMUSG00002076446			10	93	0.344086	0	0	0	0	0	0
ENSMUSG00002076932			2	68	0.808824	0	0	0	0	0	0
ENSMUSG00000119090			9	132	0.507576	0	0	0	0	0	0
ENSMUSG00000119635			12	132	0.454545	0	0	0	0	0	0
ENSMUSG00002076086			6	186	0.333333	7	2	0	0	1	0
ENSMUSG00000118588		serine (or cysteine) peptidase inhibitor, clade A, member 3G (Serpina3g) pseudogene	12	1170	0.498291	0	0	0	0	0	0
ENSMUSG00002076816			17	135	0.540741	0	0	0	0	0	0
ENSMUSG00002076938			9	115	0.53913	0	0	0	0	0	0
ENSMUSG00002076939			1	176	0.539773	0	0	0	0	0	0
ENSMUSG00000119274			16	132	0.431818	0	0	0	0	0	0
ENSMUSG00002076092			12	85	0.529412	0	0	0	0	0	0
ENSMUSG00002076982			10	108	0.490741	0	0	0	0	0	0
ENSMUSG00002076458			9	76	0.473684	0	0	0	0	0	0
ENSMUSG00002076459			12	115	0.391304	0	0	0	0	0	0
ENSMUSG00000118597		solute carrier organic anion transporter family, member 1b2 (Slco1b2) pseudogene	6	476	0.357143	0	0	0	0	0	0
ENSMUSG00002076218			1	216	0.509259	0	0	0	0	0	0
ENSMUSG00002076947			13	109	0.59633	0	0	0	0	0	0
ENSMUSG00002076099			2	104	0.394231	0	0	0	0	0	0
ENSMUSG00000118600		novel protein	2	99	0.444444	0	0	0	0	0	0
ENSMUSG00002076101			15	111	0.558559	0	0	0	0	0	0
ENSMUSG00002076466			5	74	0.554054	0	0	0	0	0	0
ENSMUSG00002076103			X	91	0.406593	0	0	0	0	0	0
ENSMUSG00000118753			2	132	0.477273	0	0	0	0	0	0
ENSMUSG00002076590			9	104	0.509615	0	0	0	0	0	0
ENSMUSG00002074888			12	72	0.541667	0	0	0	0	0	0
ENSMUSG00002076471			9	130	0.523077	0	0	0	0	0	0
ENSMUSG00002076593			19	79	0.544304	0	0	0	0	0	0
ENSMUSG00002076958			12	65	0.446154	0	0	0	0	0	0
ENSMUSG00000094514			GL456211.1	366	0.415301	0	0	0	0	0	0
ENSMUSG00002076475			1	80	0.575	0	0	0	0	0	0
ENSMUSG00002076112			5	127	0.496063	0	0	0	0	0	0
ENSMUSG00000119487			6	132	0.469697	0	0	0	0	0	0
ENSMUSG00002076114			X	111	0.135135	0	0	0	0	0	0
ENSMUSG00000119133			11	134	0.514925	0	0	0	0	0	0
ENSMUSG00002076116			2	102	0.372549	0	0	0	0	0	0
ENSMUSG00002076481			10	132	0.462121	0	0	0	0	0	0
ENSMUSG00000119855			8	92	0.369565	0	0	0	0	0	0
ENSMUSG00002076846			9	110	0.627273	0	0	0	0	0	0
ENSMUSG00002076887			2	121	0.413223	0	0	0	0	0	0
ENSMUSG00002076606			10	126	0.436508	0	0	0	0	0	0
ENSMUSG00002076243			10	95	0.547368	3	9	3	2	0	2
ENSMUSG00002076244			14	137	0.518248	0	0	0	0	0	0
ENSMUSG00002076124			8	84	0.5	0	0	0	0	0	0
ENSMUSG00002075153			4	82	0.573171	0	0	6	0	0	0
ENSMUSG00000118786			6	132	0.515152	0	0	0	0	0	0
ENSMUSG00002076975			14	124	0.475806	0	0	0	0	0	0
ENSMUSG00002076613			6	105	0.47619	0	0	0	0	0	0
ENSMUSG00002076856			11	104	0.788462	0	0	0	0	0	0
ENSMUSG00000095250			GL456211.1	366	0.480874	0	0	0	0	0	0
ENSMUSG00002076777			6	89	0.831461	0	0	0	0	0	0
ENSMUSG00000119391			3	131	0.465649	0	0	0	0	0	0
ENSMUSG00002076577			2	127	0.393701	0	0	0	0	0	0
ENSMUSG00002076578			4	68	0.602941	0	9	0	7	0	0
ENSMUSG00002076863			10	115	0.452174	0	0	0	0	0	0
ENSMUSG00002076984			11	101	0.465347	0	0	0	0	0	0
ENSMUSG00002076177			3	121	0.495868	0	0	0	0	0	0
ENSMUSG00002076138			13	89	0.550562	0	0	0	0	0	0
ENSMUSG00002076139			8	122	0.52459	0	2	0	0	0	0
ENSMUSG00002076625			8	108	0.407407	0	0	0	0	0	0
ENSMUSG00000118642			17	714	0.684874	0	2	0	0	0	1
ENSMUSG00002076142			9	111	0.630631	0	0	0	0	0	0
ENSMUSG00002076143			X	66	0.545455	0	0	0	0	0	0
ENSMUSG00002076508			15	182	0.565934	0	0	0	0	0	0
ENSMUSG00002076145			11	89	0.314607	0	0	0	0	0	0
ENSMUSG00000094337			GL456354.1	1446	0.462656	0	0	0	0	0	0
ENSMUSG00000118649		defensin beta 119 (Defb119) pseudogene	2	126	0.47619	0	0	0	0	0	0
ENSMUSG00000119733			5	132	0.545455	0	1	0	0	0	0
ENSMUSG00000095041			JH584304.1	4238	0.52336	1302	2107	1331	930	859	751
ENSMUSG00000119901			12	132	0.454545	0	0	0	0	0	0
ENSMUSG00000119548			7	132	0.469697	0	0	0	0	0	0
ENSMUSG00002076516			5	117	0.273504	0	0	0	0	0	0
ENSMUSG00002076638			10	96	0.739583	0	0	0	0	0	0
ENSMUSG00000118654		tudor domain containing 10 (TDRD10) pseudogene	3	87	0.517241	0	0	0	0	0	0
ENSMUSG00000095728			JH584298.1	1218	0.484401	0	0	0	0	0	0
ENSMUSG00002076156			8	101	0.49505	0	0	0	0	0	0
ENSMUSG00000119196			14	132	0.477273	0	0	0	0	0	0
ENSMUSG00002076643			13	107	0.672897	0	0	0	0	0	0
ENSMUSG00002076644			18	110	0.627273	0	0	0	0	0	0
ENSMUSG00000117546		TEC	17	2455	0.472505	4	15	4	3	12	4
ENSMUSG00002076889			11	80	0.575	0	0	0	0	0	0
ENSMUSG00002076526			15	60	0.566667	0	0	0	0	0	0
ENSMUSG00000108639		olfactory receptor 1400, pseudogene 1	12	908	0.387665	0	0	0	0	0	0
ENSMUSG00000118905			5	71	0.492958	8	0	0	0	2	0
ENSMUSG00002076165			3	102	0.5	0	0	0	0	0	0
ENSMUSG00002075921			9	128	0.585938	0	0	0	0	0	0
ENSMUSG00000094836			JH584299.1	1080	0.438889	0	0	0	0	0	0
ENSMUSG00002076572			8	88	0.363636	0	0	0	0	0	0
ENSMUSG00002076169			6	141	0.64539	4	8	14	2	6	10
ENSMUSG00000074720			GL456354.1	486	0.436214	0	0	0	0	0	0
ENSMUSG00002074872			8	89	0.370787	0	0	0	0	0	0
ENSMUSG00000117357		translocase of outer mitochondrial membrane 20 (Tomm20) pseudogene	18	1790	0.42514	0	0	0	0	0	0
ENSMUSG00000119573			12	132	0.454545	0	0	0	0	0	0
ENSMUSG00002076739			2	107	0.654206	0	0	0	0	0	0
ENSMUSG00001074846		IQ motif containing F3 [Source:NCBI gene (formerly Entrezgene);Acc:68265]	9	1149	0.497824	0	0	0	0	0	0
ENSMUSG00000094855			JH584299.1	1446	0.473029	0	0	0	0	0	0
ENSMUSG00002076217			12	68	0.544118	0	0	0	0	0	0
ENSMUSG00000119226			2	132	0.424242	0	0	0	0	0	0
ENSMUSG00002076300			11	121	0.487603	0	0	0	0	0	0
ENSMUSG00002076664			11	84	0.488095	0	0	0	0	0	0
ENSMUSG00000119052			16	133	0.496241	0	0	0	0	0	0
ENSMUSG00002076546			X	83	0.421687	0	0	0	0	2	4
ENSMUSG00002076911			10	76	0.592105	0	0	6	0	1	0
ENSMUSG00000118697			10	132	0.484848	0	0	0	0	0	0
ENSMUSG00002076913			16	110	0.618182	0	0	0	0	0	0
ENSMUSG00002076186			6	361	0.559557	0	0	0	0	0	0
ENSMUSG00002076187			11	85	0.282353	0	0	0	0	0	0
ENSMUSG00000118700			15	132	0.454545	0	0	0	0	0	0
ENSMUSG00000119779			8	132	0.431818	0	0	0	0	0	0
ENSMUSG00002076311			13	170	0.441176	0	4	0	0	0	0
ENSMUSG00002075827			13	98	0.591837	0	0	0	0	0	0
ENSMUSG00002076192			7	110	0.627273	0	0	0	0	0	0
ENSMUSG00000118943			9	132	0.431818	0	0	0	0	0	0
ENSMUSG00000119783			9	144	0.493056	0	0	0	0	0	0
ENSMUSG00000118714			2	132	0.439394	0	0	0	0	0	0
ENSMUSG00002076196			13	138	0.666667	0	0	0	0	0	0
ENSMUSG00002076318			6	256	0.492188	4	3	2	4	1	5
ENSMUSG00000119256			3	132	0.462121	0	0	0	0	0	0
ENSMUSG00002076684			X	98	0.408163	0	0	0	0	0	0
ENSMUSG00002076805			4	127	0.480315	0	2	0	0	0	0
ENSMUSG00000118410		zinc finger protein 75a (ZNF75A) pseudogene	16	786	0.428753	20	11	19	5	1	12
ENSMUSG00000119140			3	105	0.485714	0	0	0	0	0	0
ENSMUSG00002076324			7	80	0.4875	0	0	0	0	0	0
ENSMUSG00002076607			X	121	0.495868	0	0	0	0	0	0
ENSMUSG00002076690			12	71	0.492958	0	0	0	0	0	0
ENSMUSG00002076206			6	187	0.620321	4	0	0	7	4	0
ENSMUSG00002076571			13	101	0.247525	0	0	0	0	0	0
ENSMUSG00000118624		discs, large homolog 5 (Drosophila) (Dlg5) pseudogene	14	300	0.476667	0	0	0	0	0	0
ENSMUSG00002076937			3	127	0.511811	0	0	0	0	0	0
ENSMUSG00002076331			16	121	0.479339	0	0	0	0	0	0
ENSMUSG00000094303			JH584297.1	1218	0.469622	0	0	0	0	0	0
ENSMUSG00000119215			2	136	0.448529	0	0	0	0	0	0
ENSMUSG00002076695			12	83	0.650602	0	0	1	0	0	0
ENSMUSG00002076940			8	57	0.684211	0	0	0	0	0	0
ENSMUSG00002076215			7	98	0.438776	0	0	0	0	0	0
ENSMUSG00002076944			2	127	0.393701	0	0	0	0	0	0
ENSMUSG00002076337			2	127	0.409449	0	0	0	0	0	0
ENSMUSG00002076824			13	126	0.571429	0	0	0	0	0	0
ENSMUSG00002076704			13	109	0.59633	0	0	0	0	0	0
ENSMUSG00002076220			19	109	0.321101	0	0	0	0	0	0
ENSMUSG00002076583			2	123	0.504065	0	0	0	0	0	0
ENSMUSG00002076586			12	98	0.265306	0	0	0	0	0	0
ENSMUSG00000118925			13	133	0.43609	0	0	0	0	0	0
ENSMUSG00002076224			15	105	0.361905	0	0	0	0	0	0
ENSMUSG00002076467			10	67	0.38806	0	0	0	0	0	0
ENSMUSG00002074887			14	121	0.495868	0	0	0	0	1	0
ENSMUSG00002076469			2	64	0.546875	0	0	0	0	0	0
ENSMUSG00000079222			GL456221.1	1205	0.453112	0	0	0	0	0	0
ENSMUSG00002076714			9	105	0.561905	0	0	0	0	0	0
ENSMUSG00002076715			10	129	0.387597	0	0	0	0	0	0
ENSMUSG00002076716			12	70	0.571429	0	0	0	0	0	0
ENSMUSG00000119485			9	72	0.430556	0	0	0	0	0	0
ENSMUSG00002076637			6	125	0.704	0	0	0	0	0	0
ENSMUSG00002076476			17	126	0.587302	0	0	0	0	0	2
ENSMUSG00000118946			7	132	0.44697	0	0	0	0	0	0
ENSMUSG00002076236			1	102	0.5	0	0	0	0	0	0
ENSMUSG00002076237			6	466	0.55794	2	5	2	3	3	0
ENSMUSG00002076965			10	204	0.382353	0	0	0	0	0	0
ENSMUSG00000118659		novel transcript	3	737	0.443691	0	0	0	0	0	0
ENSMUSG00002076561			8	58	0.37931	0	0	0	0	0	0
ENSMUSG00002074859			5	89	0.41573	0	0	0	0	0	0
ENSMUSG00002076645			16	60	0.533333	0	0	0	0	0	0
ENSMUSG00002076970			3	138	0.173913	0	0	0	0	0	0
ENSMUSG00000119029			16	132	0.5	0	0	0	0	0	0
ENSMUSG00002076245			14	168	0.589286	0	0	0	0	0	0
ENSMUSG00002076488			15	109	0.623853	0	0	0	0	0	0
ENSMUSG00000118625		polycystic kidney disease 2 (Pkd2) pseudogene	5	475	0.364211	0	6	1	8	0	2
ENSMUSG00000115115		novel protein	4	78	0.564103	0	0	0	0	0	0
ENSMUSG00000119150			11	132	0.477273	0	0	0	0	0	0
ENSMUSG00000118627		IMP3, U3 small nucleolar ribonucleoprotein, homolog (yeast) (Imp3) pseudogene	5	544	0.617647	0	0	0	0	0	0
ENSMUSG00000119270			5	123	0.479675	0	0	0	0	0	0
ENSMUSG00002076817			16	106	0.349057	0	0	0	0	0	0
ENSMUSG00002076266			9	121	0.495868	0	0	0	0	0	0
ENSMUSG00000095763			JH584299.1	1446	0.464039	0	0	0	0	0	0
ENSMUSG00002076699			2	125	0.688	0	0	0	0	0	0
ENSMUSG00002076620			8	104	0.615385	0	0	0	0	0	0
ENSMUSG00002076942			2	121	0.429752	0	0	0	0	0	0
ENSMUSG00001118660			6	129	0.488372	0	0	0	0	0	0
ENSMUSG00002076987			12	110	0.572727	0	0	0	0	0	0
ENSMUSG00002076624			5	106	0.613208	0	0	0	0	0	0
ENSMUSG00000095019			JH584303.1	1083	0.430286	0	0	0	0	0	0
ENSMUSG00002076990			11	135	0.666667	0	0	0	0	0	0
ENSMUSG00000094791			JH584299.1	837	0.467145	0	0	0	0	0	0
ENSMUSG00000091585			JH584299.1	1500	0.468667	0	0	0	0	0	0
ENSMUSG00000118999			12	132	0.484848	0	0	0	0	0	0
ENSMUSG00002076683			8	109	0.669725	20	2	3	0	5	2
ENSMUSG00000118396		IQ motif containing F3 [Source:NCBI gene (formerly Entrezgene);Acc:68265]	9	2668	0.504498	0	0	0	0	0	0
ENSMUSG00000119355			11	134	0.507463	0	0	0	0	0	0
ENSMUSG00000119544			19	93	0.419355	0	0	0	0	0	0
ENSMUSG00000094799			GL456210.1	366	0.486339	0	0	0	0	0	0
ENSMUSG00000118650		zinc finger protein 445 (Zfp44) pseudogene	X	417	0.484412	0	0	0	0	0	0
ENSMUSG00002076878			9	88	0.761364	0	0	0	0	0	0
ENSMUSG00002074853			1	140	0.485714	0	1	0	0	0	0
ENSMUSG00002076759			8	84	0.5	0	0	0	0	0	0
ENSMUSG00000096680			JH584296.1	1443	0.47124	0	0	0	0	0	0
ENSMUSG00002076761			13	110	0.618182	0	0	0	0	0	0
ENSMUSG00000090765			12	294	0.455782	0	0	0	0	0	0
ENSMUSG00000095523			JH584299.1	1446	0.464039	0	0	0	0	0	0
ENSMUSG00000119804			14	105	0.457143	0	0	0	0	0	0
ENSMUSG00000119737			13	133	0.43609	0	0	9	0	0	0
ENSMUSG00002074858			13	113	0.39823	0	0	0	0	0	0
ENSMUSG00002076672			5	126	0.579365	0	0	0	0	0	0
ENSMUSG00002076647			2	126	0.587302	0	2	0	1	1	0
ENSMUSG00002076310			13	110	0.427273	0	0	0	0	0	0
ENSMUSG00002076810			1	121	0.495868	0	0	0	0	0	0
ENSMUSG00002076286			12	160	0.55	0	0	0	0	0	0
ENSMUSG00002076772			11	99	0.454545	0	0	0	0	0	2
ENSMUSG00000117965		novel protein	10	204	0.490196	0	0	0	0	0	0
ENSMUSG00002076814			8	143	0.524476	0	0	0	1	0	0
ENSMUSG00000119093			2	132	0.431818	0	0	0	0	0	0
ENSMUSG00000119806			2	136	0.441176	0	0	0	0	0	0
ENSMUSG00002076830			11	146	0.30137	0	0	0	0	0	0
ENSMUSG00002076548			6	110	0.409091	0	0	0	0	0	0
ENSMUSG00002076307			7	70	0.6	0	0	0	0	0	0
ENSMUSG00002076953			9	95	0.473684	0	0	0	0	0	0
ENSMUSG00002076457			9	107	0.420561	0	0	0	0	0	0
ENSMUSG00000119858			5	132	0.409091	0	0	0	0	0	0
ENSMUSG00002076338			15	60	0.566667	0	0	0	0	0	0
ENSMUSG00002076541			10	89	0.382022	0	0	0	0	0	0
ENSMUSG00002076906			18	111	0.153153	3	0	0	0	1	0
ENSMUSG00002076341			6	97	0.494845	0	0	0	0	0	0
ENSMUSG00002075693			16	102	0.460784	0	0	0	0	0	0
ENSMUSG00002076667			2	127	0.401575	0	0	0	0	0	0
ENSMUSG00002076789			3	110	0.627273	0	0	0	0	0	0
ENSMUSG00002076924			7	154	0.357143	0	0	0	0	0	0
ENSMUSG00000119491			9	72	0.402778	0	0	0	0	0	0
ENSMUSG00000119291			9	132	0.454545	0	0	0	0	0	0
ENSMUSG00000117901		novel transcript, antisense to Macrod1	19	953	0.529906	42	17	53	38	76	73
ENSMUSG00002076309			16	78	0.5	0	0	0	0	0	0
ENSMUSG00002076941			5	83	0.385542	0	0	0	0	0	0
ENSMUSG00002076796			7	96	0.34375	0	0	0	0	0	0
ENSMUSG00002076676			13	110	0.627273	0	0	0	0	0	0
ENSMUSG00000119128			3	85	0.423529	0	0	0	0	0	0
ENSMUSG00002076839			6	204	0.568627	0	0	0	0	0	0
ENSMUSG00002076920			Y	60	0.533333	0	0	0	0	0	0
ENSMUSG00002076191			12	205	0.55122	0	0	0	0	0	0
ENSMUSG00002076317			2	77	0.272727	0	0	0	0	0	0
ENSMUSG00002076246			7	96	0.53125	0	0	0	0	0	0
ENSMUSG00000119268			13	132	0.44697	0	0	0	0	0	0
ENSMUSG00000119846			2	132	0.44697	0	0	0	0	0	0
ENSMUSG00000119192			3	130	0.507692	0	0	0	0	0	0
ENSMUSG00000105705		anaphase-promoting complex subunit 5 pseudogene	5	1107	0.506775	0	0	0	0	0	0
ENSMUSG00000119662			11	144	0.506944	0	0	0	0	0	0
ENSMUSG00000119666			9	72	0.416667	0	0	0	0	0	0
ENSMUSG00000118777			3	131	0.442748	0	0	0	0	0	0
ENSMUSG00000119445			3	130	0.5	0	0	0	0	0	0
ENSMUSG00002076691			10	80	0.4375	0	0	0	0	0	0
ENSMUSG00002076852			19	152	0.592105	0	0	0	0	0	0
ENSMUSG00002076973			15	175	0.445714	0	0	0	0	0	0
ENSMUSG00002076854			6	80	0.4125	0	0	0	0	0	0
ENSMUSG00002076465			11	96	0.510417	0	0	0	0	0	0
ENSMUSG00002076870			15	157	0.477707	0	0	0	0	0	0
ENSMUSG00000095787			GL456211.1	372	0.502688	0	0	0	0	0	0
ENSMUSG00000079808			GL456212.1	1910	0.496859	0	0	0	0	0	0
ENSMUSG00002076751			5	99	0.505051	0	0	0	0	0	0
ENSMUSG00000119179			6	132	0.431818	0	0	0	0	0	0
ENSMUSG00002076753			2	123	0.333333	0	0	0	0	0	0
ENSMUSG00002076943			16	74	0.527027	0	0	0	0	0	0
ENSMUSG00002076581			3	67	0.38806	0	0	0	0	0	0
ENSMUSG00000117238		novel transcript	7	7600	0.405395	0	0	0	0	0	0
ENSMUSG00002076745			15	129	0.604651	0	0	0	0	0	0
ENSMUSG00002076463			11	111	0.576577	3	4	3	4	1	4
ENSMUSG00002076343			10	110	0.609091	0	0	0	0	0	0
ENSMUSG00002076721			7	195	0.584615	0	0	0	0	0	0
ENSMUSG00000096808			GL456221.1	1500	0.382667	1	0	0	0	0	0
ENSMUSG00002076398			1	124	0.572581	0	0	0	0	0	0
ENSMUSG00002076802			11	80	0.5375	1	0	0	0	0	0
ENSMUSG00002074884			12	60	0.666667	0	0	0	0	0	0
ENSMUSG00000079800			GL456210.1	1271	0.461054	0	0	0	0	0	0
ENSMUSG00002076912			12	115	0.286957	0	0	0	0	0	0
ENSMUSG00000119005			14	132	0.416667	0	0	0	0	0	0
ENSMUSG00002076674			17	145	0.57931	0	0	0	0	0	0
ENSMUSG00002076797			6	151	0.437086	0	0	0	0	0	3
ENSMUSG00000118652		novel transcript	13	358	0.513966	0	0	0	0	0	0
ENSMUSG00002076718			7	121	0.479339	0	0	0	0	0	0
ENSMUSG00002076650			11	216	0.527778	0	0	0	0	0	0
ENSMUSG00002076935			13	70	0.442857	0	0	0	0	0	0
ENSMUSG00002076934			2	110	0.572727	0	0	0	0	0	0
ENSMUSG00002076909			8	69	0.492754	0	0	0	0	0	0
ENSMUSG00000119114			6	56	0.5	0	0	0	0	0	0
ENSMUSG00002076949			10	95	0.505263	0	0	0	0	0	0
ENSMUSG00002074883			19	115	0.4	0	0	0	0	0	0
ENSMUSG00000118744			5	71	0.492958	0	0	0	0	0	0
ENSMUSG00000096728			GL456354.1	1446	0.482019	0	0	0	0	0	0
ENSMUSG00002074875			10	214	0.462617	0	0	0	0	0	0
ENSMUSG00000119144			4	83	0.481928	5	0	1	0	0	0
ENSMUSG00002076609			10	137	0.452555	0	0	0	0	0	0
ENSMUSG00002076529			6	109	0.642202	0	0	0	0	0	0
ENSMUSG00000119884			8	132	0.5	0	0	0	0	0	0
ENSMUSG00002076867			13	83	0.361446	0	0	0	0	0	0
ENSMUSG00000118641		Zinc finger protein 974 (Zfp974) pseudogene	7	57	0.403509	0	0	0	0	0	0
ENSMUSG00000118513		renalase, FAD-dependent amine oxidase (Rnls) pseudogene	19	350	0.491429	0	0	0	0	0	0
ENSMUSG00002076793			10	101	0.49505	0	0	0	0	0	0
ENSMUSG00002076478			14	91	0.373626	0	0	0	0	0	0
ENSMUSG00000119191			10	132	0.530303	0	0	0	0	0	0
ENSMUSG00002076948			12	100	0.59	0	3	0	0	1	1
ENSMUSG00002076905			5	83	0.421687	0	0	0	0	0	0
ENSMUSG00002076431			15	129	0.573643	0	0	0	0	0	0
ENSMUSG00000119649			4	83	0.481928	11	3	0	0	3	5
ENSMUSG00002074878			17	109	0.633028	0	0	0	0	0	0
ENSMUSG00000094054			GL456211.1	891	0.484848	0	0	0	0	0	0
ENSMUSG00002076880			8	91	0.417582	0	0	0	0	0	0
ENSMUSG00002076866			3	117	0.512821	0	0	0	0	0	0
ENSMUSG00002076518			6	128	0.648438	0	0	0	0	0	0
ENSMUSG00002076794			2	102	0.5	0	0	0	0	0	0
ENSMUSG00002076831			6	59	0.694915	0	0	0	0	0	0
ENSMUSG00000118647		calmodulin-like 6 (CALML6) pseudogene	4	224	0.517857	0	0	0	0	0	0
ENSMUSG00002076673			2	77	0.532468	0	0	0	0	0	0
ENSMUSG00002076584			17	125	0.592	0	0	0	0	0	0
ENSMUSG00000119610			15	132	0.469697	0	0	0	0	0	0
ENSMUSG00002076812			X	102	0.5	0	0	0	0	0	0
ENSMUSG00000115798		novel protein	15	213	0.549296	0	0	0	0	0	0
ENSMUSG00000118645			6	480	0.49375	0	0	0	0	0	0
ENSMUSG00000119068			16	132	0.477273	0	0	0	0	0	0
ENSMUSG00000119087			6	132	0.477273	0	0	0	0	0	0
ENSMUSG00000119001			15	132	0.515152	0	0	0	0	0	0
ENSMUSG00002076851			X	95	0.505263	4	0	0	0	0	14
ENSMUSG00000118644		sperm antigen with calponin homology and coiled-coil domains 1 (Specc1) pseudogene	11	133	0.518797	5	2	0	3	5	0
ENSMUSG00000079794			GL456210.1	255	0.470588	0	0	0	0	0	0
ENSMUSG00002076595			13	110	0.409091	0	0	0	0	0	0
ENSMUSG00002076872			4	76	0.671053	0	0	0	0	0	0
ENSMUSG00000119065			11	132	0.424242	0	0	0	0	0	0
ENSMUSG00002076967			3	138	0.637681	0	0	0	0	0	0
ENSMUSG00000109644	0610005C13Rik	RIKEN cDNA 0610005C13 gene [Source:MGI Symbol;Acc:MGI:1918911]	7	3583	0.538934	2	1	2	0	0	2
ENSMUSG00000108652	0610006L08Rik	RIKEN cDNA 0610006L08 gene [Source:MGI Symbol;Acc:MGI:1923503]	7	2128	0.443609	4	2	0	10	5	0
ENSMUSG00000007777	0610009B22Rik	RIKEN cDNA 0610009B22 gene [Source:MGI Symbol;Acc:MGI:1913300]	11	998	0.460922	53	54	39	40	30	32
ENSMUSG00000086714	0610009E02Rik	RIKEN cDNA 0610009E02 gene [Source:MGI Symbol;Acc:MGI:3698435]	2	1803	0.501387	15	21	3	1	10	6
ENSMUSG00000043644	0610009L18Rik	RIKEN cDNA 0610009L18 gene [Source:MGI Symbol;Acc:MGI:1914088]	11	619	0.602585	53	23	27	39	14	19
ENSMUSG00000042208	0610010F05Rik	RIKEN cDNA 0610010F05 gene [Source:MGI Symbol;Acc:MGI:1918925]	11	5226	0.410065	80	121	99	96	97	61
ENSMUSG00000020831	0610010K14Rik	RIKEN cDNA 0610010K14 gene [Source:MGI Symbol;Acc:MGI:1915609]	11	1896	0.55538	10	3	0	0	0	1
ENSMUSG00000089755	0610012D04Rik	RIKEN cDNA 0610012D04 gene [Source:MGI Symbol;Acc:MGI:1918926]	17	531	0.478343	0	0	0	0	0	0
ENSMUSG00000107002	0610012G03Rik	RIKEN cDNA 0610012G03 gene [Source:MGI Symbol;Acc:MGI:1913301]	16	1445	0.545329	214	136	155	157	155	162
ENSMUSG00000046683	0610025J13Rik	RIKEN cDNA 0610025J13 gene [Source:MGI Symbol;Acc:MGI:1915618]	4	1121	0.508475	0	0	0	0	0	0
ENSMUSG00000058706	0610030E20Rik	RIKEN cDNA 0610030E20 gene [Source:MGI Symbol;Acc:MGI:1915614]	6	5832	0.48011	187	162	145	130	135	124
ENSMUSG00000099146	0610031O16Rik	RIKEN cDNA 0610031O16 gene [Source:MGI Symbol;Acc:MGI:1915619]	3	2482	0.463739	0	0	0	0	0	0
ENSMUSG00000108236	0610033M10Rik	RIKEN cDNA 0610033M10 gene [Source:MGI Symbol;Acc:MGI:1921343]	6	1102	0.490926	0	0	0	0	0	0
ENSMUSG00000097882	0610038B21Rik	RIKEN cDNA 0610038B21 gene [Source:MGI Symbol;Acc:MGI:1917595]	8	3071	0.552589	0	1	7	1	6	0
ENSMUSG00000058812	0610039K10Rik	RIKEN cDNA 0610039K10 gene [Source:MGI Symbol;Acc:MGI:1915636]	2	952	0.584034	1	3	2	1	0	0
ENSMUSG00000089889	0610040B10Rik	RIKEN cDNA 0610040B10 gene [Source:MGI Symbol;Acc:MGI:1914922]	5	2098	0.461392	8	11	11	22	9	3
ENSMUSG00000087341	0610040F04Rik	RIKEN cDNA 0610040F04 gene [Source:MGI Symbol;Acc:MGI:1922644]	6	2150	0.47814	0	2	2	7	3	3
ENSMUSG00000060512	0610040J01Rik	RIKEN cDNA 0610040J01 gene [Source:MGI Symbol;Acc:MGI:1923511]	5	2403	0.54432	0	0	7	1	10	2
ENSMUSG00000087361	0610043K17Rik	RIKEN cDNA 0610043K17 gene [Source:MGI Symbol;Acc:MGI:1915650]	4	770	0.431169	6	3	9	7	4	9
ENSMUSG00000114511	0710001A04Rik	RIKEN cDNA 0710001A04 gene [Source:MGI Symbol;Acc:MGI:1915652]	18	1345	0.437918	0	0	0	0	0	0
ENSMUSG00000097863	1010001B22Rik	RIKEN cDNA 1010001B22 gene [Source:MGI Symbol;Acc:MGI:1922653]	5	589	0.55348	9	0	8	6	11	11
ENSMUSG00000115547	1100001I12Rik	RIKEN cDNA 1100001I12 gene [Source:MGI Symbol;Acc:MGI:1922655]	15	672	0.403274	0	0	0	0	0	0
ENSMUSG00000090066	1110002E22Rik	RIKEN cDNA 1110002E22 gene [Source:MGI Symbol;Acc:MGI:1915066]	3	9998	0.4999	5	13	1	2	20	10
ENSMUSG00000097134	1110002J07Rik	RIKEN cDNA 1110002J07 gene [Source:MGI Symbol;Acc:MGI:1915738]	10	2513	0.475925	0	0	0	0	0	0
ENSMUSG00000071456	1110002L01Rik	RIKEN cDNA 1110002L01 gene [Source:MGI Symbol;Acc:MGI:1915821]	12	4131	0.468168	134	140	123	211	127	142
ENSMUSG00000102531	1110002O04Rik	RIKEN cDNA 1110002O04 gene [Source:MGI Symbol;Acc:MGI:1915733]	1	566	0.512367	0	3	1	0	2	2
ENSMUSG00000106291	1110003F10Rik	RIKEN cDNA 1110003F10 gene [Source:MGI Symbol;Acc:MGI:1915726]	5	767	0.418514	7	11	1	2	1	0
ENSMUSG00000030663	1110004F10Rik	RIKEN cDNA 1110004F10 gene [Source:MGI Symbol;Acc:MGI:1929274]	7	2490	0.473092	1105	1052	1042	1378	1165	877
ENSMUSG00000107121	1110006O24Rik	RIKEN cDNA 1110006O24 gene [Source:MGI Symbol;Acc:MGI:1913373]	5	768	0.59375	1	3	0	6	7	17
ENSMUSG00000046119	1110008E08Rik	RIKEN cDNA 1110008E08 gene [Source:MGI Symbol;Acc:MGI:1915750]	16	723	0.521438	0	0	0	0	0	3
ENSMUSG00000039195	1110008P14Rik	RIKEN cDNA 1110008P14 gene [Source:MGI Symbol;Acc:MGI:1920987]	2	2694	0.577209	68	77	70	94	73	69
ENSMUSG00000116164	1110013H19Rik	RIKEN cDNA 1110013H19 gene [Source:MGI Symbol;Acc:MGI:1915772]	15	671	0.502235	0	2	1	5	2	0
ENSMUSG00000098659	1110015O18Rik	RIKEN cDNA 1110015O18 gene [Source:MGI Symbol;Acc:MGI:1915766]	3	2035	0.335135	0	0	0	0	0	1
ENSMUSG00000028441	1110017D15Rik	RIKEN cDNA 1110017D15 gene [Source:MGI Symbol;Acc:MGI:1920971]	4	1421	0.546094	4	1	0	0	0	0
ENSMUSG00000085151	1110018N20Rik	RIKEN cDNA 1110018N20 gene [Source:MGI Symbol;Acc:MGI:1915753]	2	1579	0.51425	5	3	3	4	2	9
ENSMUSG00000112289	1110019B22Rik	RIKEN cDNA 1110019B22 gene [Source:MGI Symbol;Acc:MGI:1915779]	10	1000	0.525	0	0	0	0	0	0
ENSMUSG00000097616	1110019D14Rik	RIKEN cDNA 1110019D14 gene [Source:MGI Symbol;Acc:MGI:1923561]	6	1734	0.393887	25	25	27	52	37	34
ENSMUSG00000097047	1110020A21Rik	RIKEN cDNA 1110020A21 gene [Source:MGI Symbol;Acc:MGI:1915781]	17	1272	0.478774	7	7	13	14	7	14
ENSMUSG00000068073	1110025L11Rik	RIKEN cDNA 1110025L11 gene [Source:MGI Symbol;Acc:MGI:1915887]	16	591	0.467005	0	0	0	0	0	0
ENSMUSG00000103520	1110025M09Rik	RIKEN cDNA 1110025M09 gene [Source:MGI Symbol;Acc:MGI:1915885]	15	855	0.419883	10	4	13	2	1	10
ENSMUSG00000085972	1110028F11Rik	RIKEN cDNA 1110028F11 gene [Source:MGI Symbol;Acc:MGI:1915940]	11	976	0.484631	3	12	1	1	0	0
ENSMUSG00000099139	1110028F18Rik	RIKEN cDNA 1110028F18 gene [Source:MGI Symbol;Acc:MGI:1915942]	8	1341	0.489933	0	0	0	0	0	0
ENSMUSG00000037971	1110032A03Rik	RIKEN cDNA 1110032A03 gene [Source:MGI Symbol;Acc:MGI:1915971]	9	5293	0.47799	102	166	207	166	161	175
ENSMUSG00000046999	1110032F04Rik	RIKEN cDNA 1110032F04 gene [Source:MGI Symbol;Acc:MGI:1915975]	3	2578	0.529868	0	0	0	0	0	0
ENSMUSG00000099098	1110035H17Rik	RIKEN cDNA 1110035H17 gene [Source:MGI Symbol;Acc:MGI:1915936]	7	1241	0.591459	2	0	2	0	0	0
ENSMUSG00000092203	1110038B12Rik	RIKEN cDNA 1110038B12 gene [Source:MGI Symbol;Acc:MGI:1916013]	17	1811	0.503589	55	45	59	74	31	23
ENSMUSG00000063236	1110038F14Rik	RIKEN cDNA 1110038F14 gene [Source:MGI Symbol;Acc:MGI:2152337]	15	1916	0.530793	155	202	200	203	191	167
ENSMUSG00000085457	1110046J04Rik	RIKEN cDNA 1110046J04 gene [Source:MGI Symbol;Acc:MGI:1916058]	13	3487	0.454259	22	20	34	12	17	15
ENSMUSG00000040591	1110051M20Rik	RIKEN cDNA 1110051M20 gene [Source:MGI Symbol;Acc:MGI:1915079]	2	5202	0.517686	315	351	306	411	230	227
ENSMUSG00000068067	1110057P08Rik	RIKEN cDNA 1110057P08 gene [Source:MGI Symbol;Acc:MGI:1916094]	16	465	0.408602	0	0	0	0	0	0
ENSMUSG00000035171	1110059E24Rik	RIKEN cDNA 1110059E24 gene [Source:MGI Symbol;Acc:MGI:1913456]	19	3067	0.43267	50	56	83	70	63	32
ENSMUSG00000032551	1110059G10Rik	RIKEN cDNA 1110059G10 gene [Source:MGI Symbol;Acc:MGI:1913452]	9	5594	0.415445	59	36	42	75	59	49
ENSMUSG00000105036	1110060G06Rik	RIKEN cDNA 1110060G06 gene [Source:MGI Symbol;Acc:MGI:1916064]	5	499	0.380762	0	0	0	0	0	1
ENSMUSG00000078570	1110065P20Rik	RIKEN cDNA 1110065P20 gene [Source:MGI Symbol;Acc:MGI:1916170]	4	2069	0.611406	72	139	117	134	107	86
ENSMUSG00000111857	1190001M18Rik	RIKEN cDNA 1190001M18 gene [Source:MGI Symbol;Acc:MGI:1916174]	11	1270	0.444094	0	0	0	0	0	0
ENSMUSG00000043687	1190005I06Rik	RIKEN cDNA 1190005I06 gene [Source:MGI Symbol;Acc:MGI:1916168]	8	1083	0.648199	6	6	1	0	2	3
ENSMUSG00000063320	1190007I07Rik	RIKEN cDNA 1190007I07 gene [Source:MGI Symbol;Acc:MGI:3698433]	10	1197	0.519632	23	27	34	12	16	12
ENSMUSG00000110013	1190028D05Rik	RIKEN cDNA 1190028D05 gene [Source:MGI Symbol;Acc:MGI:3036227]	8	763	0.40367	0	0	0	0	0	0
ENSMUSG00000087684	1200007C13Rik	RIKEN cDNA 1200007C13 gene [Source:MGI Symbol;Acc:MGI:1921369]	2	2455	0.562118	0	4	7	0	7	1
ENSMUSG00000097290	1300002E11Rik	RIKEN cDNA 1300002E11 gene [Source:MGI Symbol;Acc:MGI:1919001]	16	4213	0.43342	191	186	102	126	157	106
ENSMUSG00000112545	1300014J16Rik	RIKEN cDNA 1300014J16 gene [Source:MGI Symbol;Acc:MGI:1921410]	12	1337	0.513089	5	0	2	0	4	3
ENSMUSG00000033688	1300017J02Rik	RIKEN cDNA 1300017J02 gene [Source:MGI Symbol;Acc:MGI:1919025]	9	4508	0.502884	11	34	11	18	24	19
ENSMUSG00000096221	1500002C15Rik	RIKEN cDNA 1500002C15 gene [Source:MGI Symbol;Acc:MGI:1916196]	4	2183	0.51443	19	12	9	7	25	10
ENSMUSG00000097595	1500002F19Rik	RIKEN cDNA 1500002F19 gene [Source:MGI Symbol;Acc:MGI:1923933]	7	1239	0.51816	3	12	11	6	3	11
ENSMUSG00000098912	1500004A13Rik	RIKEN cDNA 1500004A13 gene [Source:MGI Symbol;Acc:MGI:2442808]	3	13854	0.476036	192	161	69	85	109	101
ENSMUSG00000104888	1500005C15Rik	RIKEN cDNA 1500005C15 gene [Source:MGI Symbol;Acc:MGI:1919269]	3	2394	0.458647	0	0	0	0	4	0
ENSMUSG00000068099	1500009C09Rik	RIKEN cDNA 1500009C09 gene [Source:MGI Symbol;Acc:MGI:1923755]	15	1904	0.550945	9	23	27	25	50	28
ENSMUSG00000087651	1500009L16Rik	RIKEN cDNA 1500009L16 gene [Source:MGI Symbol;Acc:MGI:1917034]	10	3465	0.464646	25	21	7	5	4	16
ENSMUSG00000072694	1500011B03Rik	RIKEN cDNA 1500011B03 gene [Source:MGI Symbol;Acc:MGI:1913486]	5	2693	0.502785	220	271	265	382	372	287
ENSMUSG00000097247	1500012K07Rik	RIKEN cDNA 1500012K07 gene [Source:MGI Symbol;Acc:MGI:1916204]	7	2630	0.437643	2	0	0	3	0	0
ENSMUSG00000098702	1500015A07Rik	RIKEN cDNA 1500015A07 gene [Source:MGI Symbol;Acc:MGI:1916232]	18	2296	0.47169	44	27	21	8	21	5
ENSMUSG00000094732	1500015L24Rik	RIKEN cDNA 1500015L24 gene [Source:MGI Symbol;Acc:MGI:1916244]	19	2743	0.423259	19	26	13	17	29	32
ENSMUSG00000097383	1500026H17Rik	RIKEN cDNA 1500026H17 gene [Source:MGI Symbol;Acc:MGI:1916252]	10	3027	0.428807	5	2	7	8	14	9
ENSMUSG00000117718	1500032F14Rik	RIKEN cDNA 1500032F14 gene [Source:MGI Symbol;Acc:MGI:1925555]	19	460	0.541304	0	2	0	0	1	0
ENSMUSG00000059631	1500035N22Rik	RIKEN cDNA 1500035N22 gene [Source:MGI Symbol;Acc:MGI:1917508]	5	865	0.477457	0	0	0	0	4	0
ENSMUSG00000043747	1520401A03Rik	RIKEN cDNA 1520401A03 gene [Source:MGI Symbol;Acc:MGI:2443785]	17	4111	0.542934	0	0	1	0	0	0
ENSMUSG00000117232	1600002D24Rik	RIKEN cDNA 1600002D24 gene [Source:MGI Symbol;Acc:MGI:1917026]	16	2822	0.506733	2	0	3	0	0	0
ENSMUSG00000101585	1600010M07Rik	RIKEN cDNA 1600010M07 gene [Source:MGI Symbol;Acc:MGI:1917031]	7	1729	0.463274	0	0	0	0	0	0
ENSMUSG00000050088	1600012H06Rik	RIKEN cDNA 1600012H06 gene [Source:MGI Symbol;Acc:MGI:1915162]	17	3294	0.440498	125	141	157	182	166	106
ENSMUSG00000047661	1600012P17Rik	RIKEN cDNA 1600012P17 gene [Source:MGI Symbol;Acc:MGI:1919275]	1	2592	0.430556	0	0	0	0	0	0
ENSMUSG00000054676	1600014C10Rik	RIKEN cDNA 1600014C10 gene [Source:MGI Symbol;Acc:MGI:1919494]	7	3948	0.509878	26	29	20	49	37	44
ENSMUSG00000094690	1600014C23Rik	RIKEN cDNA 1600014C23 gene [Source:MGI Symbol;Acc:MGI:1919490]	17	518	0.523166	2	0	3	0	1	0
ENSMUSG00000102505	1600017P15Rik	RIKEN cDNA 1600017P15 gene [Source:MGI Symbol;Acc:MGI:1920499]	3	890	0.568539	0	0	0	0	0	0
ENSMUSG00000099429	1600019K03Rik	RIKEN cDNA 1600019K03 gene [Source:MGI Symbol;Acc:MGI:1917018]	16	477	0.469602	0	0	0	0	0	0
ENSMUSG00000097048	1600020E01Rik	RIKEN cDNA 1600020E01 gene [Source:MGI Symbol;Acc:MGI:1919262]	6	4328	0.503466	82	131	116	92	97	95
ENSMUSG00000117315	1600022D10Rik	RIKEN cDNA 1600022D10 gene [Source:MGI Symbol;Acc:MGI:1920502]	17	1562	0.419974	0	0	0	0	0	0
ENSMUSG00000104986	1600023N17Rik	RIKEN cDNA 1600023N17 gene [Source:MGI Symbol;Acc:MGI:1917038]	5	1007	0.496524	0	0	0	0	3	0
ENSMUSG00000085114	1600025M17Rik	RIKEN cDNA 1600025M17 gene [Source:MGI Symbol;Acc:MGI:1919280]	X	1071	0.438842	0	0	0	0	0	0
ENSMUSG00000110340	1600027J07Rik	RIKEN cDNA 1600027J07 gene [Source:MGI Symbol;Acc:MGI:1917044]	8	489	0.453988	0	0	0	6	0	1
ENSMUSG00000057818	1600029O15Rik	RIKEN cDNA 1600029O15 gene [Source:MGI Symbol;Acc:MGI:3045362]	9	1809	0.464898	0	0	0	0	1	0
ENSMUSG00000047150	1700001C19Rik	RIKEN cDNA 1700001C19 gene [Source:MGI Symbol;Acc:MGI:1922712]	17	1896	0.518987	0	0	0	0	0	0
ENSMUSG00000099419	1700001D01Rik	RIKEN cDNA 1700001D01 gene [Source:MGI Symbol;Acc:MGI:1916529]	8	565	0.472566	3	0	0	0	0	0
ENSMUSG00000095384	1700001F09Rik	RIKEN cDNA 1700001F09 gene [Source:MGI Symbol;Acc:MGI:1919076]	14	884	0.397059	0	0	0	0	0	0
ENSMUSG00000087170	1700001G01Rik	RIKEN cDNA 1700001G01 gene [Source:MGI Symbol;Acc:MGI:1922683]	18	2249	0.425078	0	0	0	0	0	0
ENSMUSG00000085984	1700001G11Rik	RIKEN cDNA 1700001G11 gene [Source:MGI Symbol;Acc:MGI:1916553]	14	1080	0.533333	0	2	0	0	0	0
ENSMUSG00000103746	1700001G17Rik	RIKEN cDNA 1700001G17 gene [Source:MGI Symbol;Acc:MGI:1914753]	1	889	0.575928	0	0	0	1	1	0
ENSMUSG00000095040	1700001J03Rik	RIKEN cDNA 1700001J03 gene [Source:MGI Symbol;Acc:MGI:1916532]	5	868	0.493088	0	7	1	0	3	3
ENSMUSG00000086135	1700001J04Rik	RIKEN cDNA 1700001J04 gene [Source:MGI Symbol;Acc:MGI:1919075]	11	929	0.533907	0	0	0	0	0	0
ENSMUSG00000101963	1700001J11Rik	RIKEN cDNA 1700001J11 gene [Source:MGI Symbol;Acc:MGI:1919474]	9	2664	0.464715	5	0	0	0	0	0
ENSMUSG00000056508	1700001K19Rik	RIKEN cDNA 1700001K19 gene [Source:MGI Symbol;Acc:MGI:1913573]	12	955	0.566492	0	1	2	0	0	0
ENSMUSG00000118314	1700001K23Rik	RIKEN cDNA 1700001K23 gene [Source:MGI Symbol;Acc:MGI:1916569]	19	1535	0.490554	0	0	2	0	0	0
ENSMUSG00000075511	1700001L05Rik	RIKEN cDNA 1700001L05 gene [Source:MGI Symbol;Acc:MGI:1916541]	15	6112	0.466787	34	32	34	22	24	2
ENSMUSG00000021534	1700001L19Rik	RIKEN cDNA 1700001L19 gene [Source:MGI Symbol;Acc:MGI:1916565]	13	1826	0.464951	0	0	0	0	1	0
ENSMUSG00000106210	1700001N15Rik	RIKEN cDNA 1700001N15 gene [Source:MGI Symbol;Acc:MGI:1923629]	3	482	0.408714	0	0	0	0	0	0
ENSMUSG00000044320	1700001O22Rik	RIKEN cDNA 1700001O22 gene [Source:MGI Symbol;Acc:MGI:1923631]	2	2788	0.592181	12	2	0	0	0	0
ENSMUSG00000018543	1700001P01Rik	RIKEN cDNA 1700001P01 gene [Source:MGI Symbol;Acc:MGI:1919465]	11	624	0.508013	7	0	0	0	0	0
ENSMUSG00000099391	1700003C15Rik	RIKEN cDNA 1700003C15 gene [Source:MGI Symbol;Acc:MGI:1916595]	5	1871	0.407803	0	0	0	0	0	0
ENSMUSG00000085944	1700003D09Rik	RIKEN cDNA 1700003D09 gene [Source:MGI Symbol;Acc:MGI:1916588]	11	1389	0.536357	0	0	0	2	0	2
ENSMUSG00000030030	1700003E16Rik	RIKEN cDNA 1700003E16 gene [Source:MGI Symbol;Acc:MGI:1919087]	6	2221	0.606033	13	6	1	15	7	0
ENSMUSG00000095110	1700003E24Rik	RIKEN cDNA 1700003E24 gene [Source:MGI Symbol;Acc:MGI:1916607]	X	577	0.450607	0	0	0	0	0	0
ENSMUSG00000038523	1700003F12Rik	RIKEN cDNA 1700003F12 gene [Source:MGI Symbol;Acc:MGI:1922730]	2	976	0.643443	2	0	0	0	0	2
ENSMUSG00000087621	1700003G18Rik	RIKEN cDNA 1700003G18 gene [Source:MGI Symbol;Acc:MGI:1916600]	7	1799	0.411895	0	0	0	0	0	0
ENSMUSG00000039174	1700003H04Rik	RIKEN cDNA 1700003H04 gene [Source:MGI Symbol;Acc:MGI:1923637]	3	1591	0.412319	0	0	0	0	0	0
ENSMUSG00000107526	1700003I16Rik	RIKEN cDNA 1700003I16 gene [Source:MGI Symbol;Acc:MGI:1923949]	6	1058	0.454631	0	0	0	0	0	0
ENSMUSG00000100372	1700003I22Rik	RIKEN cDNA 1700003I22 gene [Source:MGI Symbol;Acc:MGI:1916606]	1	482	0.470954	0	0	0	0	0	0
ENSMUSG00000101565	1700003L19Rik	RIKEN cDNA 1700003L19 gene [Source:MGI Symbol;Acc:MGI:1922743]	16	1269	0.437352	0	0	0	0	0	0
ENSMUSG00000085389	1700003M07Rik	RIKEN cDNA 1700003M07 gene [Source:MGI Symbol;Acc:MGI:1919475]	4	873	0.533792	1	8	7	14	8	7
ENSMUSG00000102463	1700003N22Rik	RIKEN cDNA 1700003N22 gene [Source:MGI Symbol;Acc:MGI:1919464]	3	808	0.601485	0	0	0	0	0	0
ENSMUSG00000118311	1700003O11Rik	RIKEN cDNA 1700003O11 gene [Source:MGI Symbol;Acc:MGI:1922882]	18	582	0.503436	0	0	0	0	0	0
ENSMUSG00000100727	1700003P14Rik	RIKEN cDNA 1700003P14 gene [Source:MGI Symbol;Acc:MGI:1916594]	13	1146	0.391798	0	0	0	0	0	0
ENSMUSG00000027973	1700006A11Rik	RIKEN cDNA 1700006A11 gene [Source:MGI Symbol;Acc:MGI:1919074]	3	2161	0.412309	0	0	0	0	0	0
ENSMUSG00000100274	1700006F04Rik	RIKEN cDNA 1700006F04 gene [Source:MGI Symbol;Acc:MGI:1922682]	14	441	0.433107	0	1	0	0	0	0
ENSMUSG00000102000	1700006H21Rik	RIKEN cDNA 1700006H21 gene [Source:MGI Symbol;Acc:MGI:1919507]	13	627	0.508772	0	0	0	0	0	0
ENSMUSG00000034764	1700006J14Rik	RIKEN cDNA 1700006J14 gene [Source:MGI Symbol;Acc:MGI:2447818]	10	2885	0.464471	0	0	2	1	0	0
ENSMUSG00000102738	1700006P03Rik	RIKEN cDNA 1700006P03 gene [Source:MGI Symbol;Acc:MGI:1925628]	1	409	0.435208	0	0	0	0	0	0
ENSMUSG00000101234	1700007E05Rik	RIKEN cDNA 1700007E05 gene [Source:MGI Symbol;Acc:MGI:2149745]	16	2628	0.436073	0	1	0	0	0	0
ENSMUSG00000100666	1700007F19Rik	RIKEN cDNA 1700007F19 gene [Source:MGI Symbol;Acc:MGI:1915100]	3	1642	0.4257	0	11	1	1	0	0
ENSMUSG00000116556	1700007H22Rik	RIKEN cDNA 1700007H22 gene [Source:MGI Symbol;Acc:MGI:1922734]	16	537	0.43203	0	0	0	0	0	0
ENSMUSG00000086330	1700007J10Rik	RIKEN cDNA 1700007J10 gene [Source:MGI Symbol;Acc:MGI:1916570]	11	1298	0.493837	0	2	1	0	1	0
ENSMUSG00000026831	1700007K13Rik	RIKEN cDNA 1700007K13 gene [Source:MGI Symbol;Acc:MGI:1916577]	2	965	0.525389	0	0	0	0	2	0
ENSMUSG00000097318	1700007L15Rik	RIKEN cDNA 1700007L15 gene [Source:MGI Symbol;Acc:MGI:1916581]	16	738	0.520325	13	2	11	6	5	1
ENSMUSG00000086613	1700007M16Rik	RIKEN cDNA 1700007M16 gene [Source:MGI Symbol;Acc:MGI:1919487]	2	435	0.448276	0	0	0	0	0	0
ENSMUSG00000089730	1700007P06Rik	RIKEN cDNA 1700007P06 gene [Source:MGI Symbol;Acc:MGI:1916558]	1	823	0.504253	0	0	0	0	0	1
ENSMUSG00000103452	1700008A23Rik	RIKEN cDNA 1700008A23 gene [Source:MGI Symbol;Acc:MGI:1922713]	9	691	0.510854	0	0	2	0	0	0
ENSMUSG00000104872	1700008B11Rik	RIKEN cDNA 1700008B11 gene [Source:MGI Symbol;Acc:MGI:1913571]	5	634	0.55205	0	6	20	3	2	1
ENSMUSG00000111986	1700008C04Rik	RIKEN cDNA 1700008C04 gene [Source:MGI Symbol;Acc:MGI:1922744]	12	797	0.461731	0	0	0	0	0	0
ENSMUSG00000106860	1700008H02Rik	RIKEN cDNA 1700008H02 gene [Source:MGI Symbol;Acc:MGI:1913575]	5	1684	0.388361	0	0	0	0	0	0
ENSMUSG00000101225	1700008J07Rik	RIKEN cDNA 1700008J07 gene [Source:MGI Symbol;Acc:MGI:1916610]	7	2432	0.512336	56	65	50	59	39	25
ENSMUSG00000101012	1700008K24Rik	RIKEN cDNA 1700008K24 gene [Source:MGI Symbol;Acc:MGI:1916561]	17	950	0.504211	0	0	0	0	0	0
ENSMUSG00000109657	1700008N11Rik	RIKEN cDNA 1700008N11 gene [Source:MGI Symbol;Acc:MGI:1922692]	8	636	0.424528	0	0	0	0	0	0
ENSMUSG00000008028	1700008O03Rik	RIKEN cDNA 1700008O03 gene [Source:MGI Symbol;Acc:MGI:1916599]	7	3675	0.518367	3	14	1	11	1	0
ENSMUSG00000069118	1700008P02Rik	RIKEN cDNA 1700008P02 gene [Source:MGI Symbol;Acc:MGI:1916597]	3	783	0.440613	0	0	0	0	0	0
ENSMUSG00000101404	1700009C05Rik	RIKEN cDNA 1700009C05 gene [Source:MGI Symbol;Acc:MGI:1921470]	6	788	0.442893	0	0	0	0	0	0
ENSMUSG00000096573	1700009J07Rik	RIKEN cDNA 1700009J07 gene [Source:MGI Symbol;Acc:MGI:1914938]	10	1368	0.51462	0	0	0	0	2	0
ENSMUSG00000028287	1700009N14Rik	RIKEN cDNA 1700009N14 gene [Source:MGI Symbol;Acc:MGI:1922721]	4	1258	0.5	0	0	0	0	0	0
ENSMUSG00000057047	1700010B08Rik	RIKEN cDNA 1700010B08 gene [Source:MGI Symbol;Acc:MGI:1922735]	2	899	0.509455	0	0	0	0	0	0
ENSMUSG00000099958	1700010B13Rik	RIKEN cDNA 1700010B13 gene [Source:MGI Symbol;Acc:MGI:1922741]	15	2102	0.499524	0	0	0	0	0	0
ENSMUSG00000071721	1700010D01Rik	RIKEN cDNA 1700010D01 gene [Source:MGI Symbol;Acc:MGI:1923636]	X	507	0.451677	0	0	0	0	0	0
ENSMUSG00000115752	1700010G06Rik	RIKEN cDNA 1700010G06 gene [Source:MGI Symbol;Acc:MGI:1921467]	15	683	0.484627	0	5	0	3	0	0
ENSMUSG00000067101	1700010H22Rik	RIKEN cDNA 1700010H22 gene [Source:MGI Symbol;Acc:MGI:1922750]	5	1355	0.41107	2	0	0	9	4	10
ENSMUSG00000100010	1700010I02Rik	RIKEN cDNA 1700010I02 gene [Source:MGI Symbol;Acc:MGI:1922726]	3	577	0.400347	0	0	0	0	0	0
ENSMUSG00000023873	1700010I14Rik	RIKEN cDNA 1700010I14 gene [Source:MGI Symbol;Acc:MGI:1914181]	17	2292	0.484729	0	5	10	19	3	6
ENSMUSG00000100314	1700010J16Rik	RIKEN cDNA 1700010J16 gene [Source:MGI Symbol;Acc:MGI:1916605]	10	928	0.414871	0	0	0	0	0	0
ENSMUSG00000092599	1700010K23Rik	RIKEN cDNA 1700010K23 gene [Source:MGI Symbol;Acc:MGI:1922751]	16	376	0.396277	2	0	1	0	0	0
ENSMUSG00000085102	1700010K24Rik	RIKEN cDNA 1700010K24 gene [Source:MGI Symbol;Acc:MGI:1922690]	3	226	0.473451	4	0	0	0	0	0
ENSMUSG00000030636	1700010L04Rik	RIKEN cDNA 1700010L04 gene [Source:MGI Symbol;Acc:MGI:1916583]	7	1577	0.447685	0	0	0	0	0	0
ENSMUSG00000101855	1700010N08Rik	RIKEN cDNA 1700010N08 gene [Source:MGI Symbol;Acc:MGI:1916590]	7	1414	0.448373	0	0	0	0	0	0
ENSMUSG00000102099	1700011B04Rik	RIKEN cDNA 1700011B04 gene [Source:MGI Symbol;Acc:MGI:1922894]	13	4166	0.417907	0	0	0	0	0	0
ENSMUSG00000108800	1700011C11Rik	RIKEN cDNA 1700011C11 gene [Source:MGI Symbol;Acc:MGI:1922701]	7	365	0.449315	0	0	0	0	0	0
ENSMUSG00000108791	1700011D18Rik	RIKEN cDNA 1700011D18 gene [Source:MGI Symbol;Acc:MGI:1922714]	7	277	0.509025	0	0	0	0	0	0
ENSMUSG00000109759	1700011L03Rik	RIKEN cDNA 1700011L03 gene [Source:MGI Symbol;Acc:MGI:1916535]	8	608	0.529605	0	0	0	0	0	0
ENSMUSG00000031682	1700011L22Rik	RIKEN cDNA 1700011L22 gene [Source:MGI Symbol;Acc:MGI:1914937]	8	1026	0.515595	0	0	0	0	0	0
ENSMUSG00000079476	1700011M02Rik	RIKEN cDNA 1700011M02 gene [Source:MGI Symbol;Acc:MGI:1922693]	X	420	0.533333	0	0	0	0	0	0
ENSMUSG00000029766	1700012A03Rik	RIKEN cDNA 1700012A03 gene [Source:MGI Symbol;Acc:MGI:1923632]	6	1008	0.509921	0	0	0	0	0	0
ENSMUSG00000020617	1700012B07Rik	RIKEN cDNA 1700012B07 gene [Source:MGI Symbol;Acc:MGI:1916574]	11	2177	0.502526	0	0	0	0	0	0
ENSMUSG00000031927	1700012B09Rik	RIKEN cDNA 1700012B09 gene [Source:MGI Symbol;Acc:MGI:1916575]	9	819	0.484737	2	0	0	0	0	0
ENSMUSG00000086482	1700012C08Rik	RIKEN cDNA 1700012C08 gene [Source:MGI Symbol;Acc:MGI:1923635]	4	363	0.495868	0	0	0	0	0	0
ENSMUSG00000085470	1700012C14Rik	RIKEN cDNA 1700012C14 gene [Source:MGI Symbol;Acc:MGI:1916587]	6	622	0.501608	0	0	0	0	0	0
ENSMUSG00000110424	1700012D14Rik	RIKEN cDNA 1700012D14 gene [Source:MGI Symbol;Acc:MGI:1922729]	7	4153	0.431977	37	26	11	7	23	23
ENSMUSG00000105023	1700012D16Rik	RIKEN cDNA 1700012D16 gene [Source:MGI Symbol;Acc:MGI:1922739]	3	577	0.490468	0	11	1	0	1	0
ENSMUSG00000101275	1700012E03Rik	RIKEN cDNA 1700012E03 gene [Source:MGI Symbol;Acc:MGI:1923817]	1	1377	0.49528	0	0	0	0	0	0
ENSMUSG00000102069	1700012I11Rik	RIKEN cDNA 1700012I11 gene [Source:MGI Symbol;Acc:MGI:1916584]	15	1039	0.460058	0	0	0	0	0	0
ENSMUSG00000107394	1700012J15Rik	RIKEN cDNA 1700012J15 gene [Source:MGI Symbol;Acc:MGI:1922737]	6	471	0.503185	0	0	0	0	0	0
ENSMUSG00000103545	1700012J22Rik	RIKEN cDNA 1700012J22 gene [Source:MGI Symbol;Acc:MGI:1922746]	13	830	0.480723	0	0	0	0	0	0
ENSMUSG00000028589	1700012P22Rik	RIKEN cDNA 1700012P22 gene [Source:MGI Symbol;Acc:MGI:1916614]	4	974	0.4846	0	0	0	0	0	0
ENSMUSG00000106899	1700013A02Rik	RIKEN cDNA 1700013A02 gene [Source:MGI Symbol;Acc:MGI:1916616]	5	645	0.429457	0	0	0	0	0	0
ENSMUSG00000079346	1700013D24Rik	RIKEN cDNA 1700013D24 gene [Source:MGI Symbol;Acc:MGI:1924171]	6	513	0.465887	0	0	0	0	0	0
ENSMUSG00000027886	1700013F07Rik	RIKEN cDNA 1700013F07 gene [Source:MGI Symbol;Acc:MGI:1922754]	3	1452	0.473829	0	4	0	0	0	1
ENSMUSG00000041399	1700013G24Rik	RIKEN cDNA 1700013G24 gene [Source:MGI Symbol;Acc:MGI:1916630]	4	1048	0.563931	0	1	0	0	0	0
ENSMUSG00000054727	1700013H16Rik	RIKEN cDNA 1700013H16 gene [Source:MGI Symbol;Acc:MGI:1922764]	X	1224	0.420752	0	0	0	0	0	0
ENSMUSG00000106586	1700013M08Rik	RIKEN cDNA 1700013M08 gene [Source:MGI Symbol;Acc:MGI:1922755]	5	1481	0.456448	0	0	0	0	0	0
ENSMUSG00000085801	1700013N06Rik	RIKEN cDNA 1700013N06 gene [Source:MGI Symbol;Acc:MGI:1922884]	12	663	0.46908	0	0	0	0	0	0
ENSMUSG00000118578	1700014B07Rik	RIKEN cDNA 1700014B07 gene [Source:MGI Symbol;Acc:MGI:1919498]	2	818	0.718826	5	1	4	0	1	4
ENSMUSG00000051054	1700014D04Rik	RIKEN cDNA 1700014D04 gene [Source:MGI Symbol;Acc:MGI:1921474]	13	3281	0.497409	0	10	0	0	0	1
ENSMUSG00000105903	1700014F14Rik	RIKEN cDNA 1700014F14 gene [Source:MGI Symbol;Acc:MGI:1924172]	5	197	0.426396	0	0	0	0	0	0
ENSMUSG00000110056	1700014L14Rik	RIKEN cDNA 1700014L14 gene [Source:MGI Symbol;Acc:MGI:1924173]	8	481	0.376299	0	0	0	0	0	0
ENSMUSG00000113696	1700015C15Rik	RIKEN cDNA 1700015C15 gene [Source:MGI Symbol;Acc:MGI:1922782]	13	374	0.44385	9	0	0	0	1	0
ENSMUSG00000104908	1700015C17Rik	RIKEN cDNA 1700015C17 gene [Source:MGI Symbol;Acc:MGI:1924178]	3	239	0.485356	0	2	0	0	0	0
ENSMUSG00000094445	1700015G11Rik	RIKEN cDNA 1700015G11 gene [Source:MGI Symbol;Acc:MGI:1922779]	7	397	0.463476	0	0	0	0	0	0
ENSMUSG00000115761	1700015H07Rik	RIKEN cDNA 1700015H07 gene [Source:MGI Symbol;Acc:MGI:1922777]	15	560	0.398214	0	0	0	0	0	0
ENSMUSG00000110335	1700015I17Rik	RIKEN cDNA 1700015I17 gene [Source:MGI Symbol;Acc:MGI:1922784]	8	2099	0.474988	0	0	0	0	0	0
ENSMUSG00000097671	1700015O11Rik	RIKEN cDNA 1700015O11 gene [Source:MGI Symbol;Acc:MGI:1919105]	6	678	0.510324	0	0	0	0	0	0
ENSMUSG00000102737	1700016A09Rik	RIKEN cDNA 1700016A09 gene [Source:MGI Symbol;Acc:MGI:1921477]	8	835	0.677844	27	0	0	3	3	6
ENSMUSG00000104538	1700016B01Rik	RIKEN cDNA 1700016B01 gene [Source:MGI Symbol;Acc:MGI:1922890]	5	270	0.555556	0	0	0	0	0	0
ENSMUSG00000108979	1700016B15Rik	RIKEN cDNA 1700016B15 gene [Source:MGI Symbol;Acc:MGI:1916677]	7	733	0.555252	1	2	1	0	0	0
ENSMUSG00000015962	1700016C15Rik	RIKEN cDNA 1700016C15 gene [Source:MGI Symbol;Acc:MGI:1916678]	1	768	0.458333	0	0	1	0	0	0
ENSMUSG00000031509	1700016D06Rik	RIKEN cDNA 1700016D06 gene [Source:MGI Symbol;Acc:MGI:1923663]	8	1612	0.453474	0	0	0	0	0	0
ENSMUSG00000103481	1700016D08Rik	RIKEN cDNA 1700016D08 gene [Source:MGI Symbol;Acc:MGI:1925627]	16	368	0.595109	0	1	0	0	0	0
ENSMUSG00000104955	1700016F12Rik	RIKEN cDNA 1700016F12 gene [Source:MGI Symbol;Acc:MGI:1916674]	5	655	0.433588	0	0	0	0	0	0
ENSMUSG00000100625	1700016G22Rik	RIKEN cDNA 1700016G22 gene [Source:MGI Symbol;Acc:MGI:1919117]	13	740	0.462162	0	0	0	0	0	0
ENSMUSG00000114673	1700016H03Rik	RIKEN cDNA 1700016H03 gene [Source:MGI Symbol;Acc:MGI:1922903]	19	437	0.508009	0	0	0	0	0	0
ENSMUSG00000029320	1700016H13Rik	RIKEN cDNA 1700016H13 gene [Source:MGI Symbol;Acc:MGI:1921468]	5	1751	0.49743	2	2	0	1	0	0
ENSMUSG00000111103	1700016J18Rik	RIKEN cDNA 1700016J18 gene [Source:MGI Symbol;Acc:MGI:1922811]	10	249	0.481928	5	9	1	2	0	7
ENSMUSG00000114563	1700016K05Rik	RIKEN cDNA 1700016K05 gene [Source:MGI Symbol;Acc:MGI:1922794]	17	386	0.42487	0	0	0	0	0	0
ENSMUSG00000053783	1700016K19Rik	RIKEN cDNA 1700016K19 gene [Source:MGI Symbol;Acc:MGI:1921480]	11	921	0.571118	0	0	0	0	0	0
ENSMUSG00000101483	1700016L21Rik	RIKEN cDNA 1700016L21 gene [Source:MGI Symbol;Acc:MGI:1919458]	1	968	0.427686	0	0	0	0	0	0
ENSMUSG00000085609	1700016P03Rik	RIKEN cDNA 1700016P03 gene [Source:MGI Symbol;Acc:MGI:1922792]	11	863	0.464658	3	2	0	0	3	8
ENSMUSG00000101894	1700016P04Rik	RIKEN cDNA 1700016P04 gene [Source:MGI Symbol;Acc:MGI:1916663]	6	429	0.41958	0	0	0	0	0	0
ENSMUSG00000032300	1700017B05Rik	RIKEN cDNA 1700017B05 gene [Source:MGI Symbol;Acc:MGI:1921461]	9	5235	0.572875	203	227	212	252	195	166
ENSMUSG00000037884	1700017G19Rik	RIKEN cDNA 1700017G19 gene [Source:MGI Symbol;Acc:MGI:1919477]	3	2904	0.455923	0	0	0	0	0	0
ENSMUSG00000098727	1700017I07Rik	RIKEN cDNA 1700017I07 gene [Source:MGI Symbol;Acc:MGI:1922756]	9	462	0.495671	0	3	0	0	0	0
ENSMUSG00000086348	1700017J07Rik	RIKEN cDNA 1700017J07 gene [Source:MGI Symbol;Acc:MGI:1922758]	2	473	0.501057	0	0	0	0	0	0
ENSMUSG00000107232	1700017L05Rik	RIKEN cDNA 1700017L05 gene [Source:MGI Symbol;Acc:MGI:1916620]	5	558	0.523297	0	0	0	0	0	0
ENSMUSG00000105651	1700017M07Rik	RIKEN cDNA 1700017M07 gene [Source:MGI Symbol;Acc:MGI:1923648]	3	940	0.489362	0	0	0	1	0	0
ENSMUSG00000056912	1700017N19Rik	RIKEN cDNA 1700017N19 gene [Source:MGI Symbol;Acc:MGI:1913855]	10	2353	0.399915	0	0	2	0	0	0
ENSMUSG00000038408	1700018A04Rik	RIKEN cDNA 1700018A04 gene [Source:MGI Symbol;Acc:MGI:1916631]	13	4216	0.533207	0	0	0	0	0	0
ENSMUSG00000103616	1700018A14Rik	RIKEN cDNA 1700018A14 gene [Source:MGI Symbol;Acc:MGI:1916641]	18	711	0.601969	0	0	0	0	0	0
ENSMUSG00000107368	1700018A23Rik	RIKEN cDNA 1700018A23 gene [Source:MGI Symbol;Acc:MGI:1919481]	6	398	0.525126	7	3	0	2	6	2
ENSMUSG00000031809	1700018B08Rik	RIKEN cDNA 1700018B08 gene [Source:MGI Symbol;Acc:MGI:1923655]	8	1294	0.572643	0	0	0	0	0	0
ENSMUSG00000037910	1700018B24Rik	RIKEN cDNA 1700018B24 gene [Source:MGI Symbol;Acc:MGI:1913582]	3	593	0.487352	0	0	0	0	0	0
ENSMUSG00000029620	1700018F24Rik	RIKEN cDNA 1700018F24 gene [Source:MGI Symbol;Acc:MGI:1916646]	5	1122	0.475045	0	0	0	0	0	0
ENSMUSG00000109745	1700018G05Rik	RIKEN cDNA 1700018G05 gene [Source:MGI Symbol;Acc:MGI:1916638]	X	386	0.554404	0	0	0	0	0	0
ENSMUSG00000100075	1700018L02Rik	RIKEN cDNA 1700018L02 gene [Source:MGI Symbol;Acc:MGI:1914579]	19	2485	0.51992	3	4	1	14	6	8
ENSMUSG00000046145	1700018M17Rik	RIKEN cDNA 1700018M17 gene [Source:MGI Symbol;Acc:MGI:1919495]	4	456	0.756579	0	4	0	0	0	0
ENSMUSG00000110709	1700018P08Rik	RIKEN cDNA 1700018P08 gene [Source:MGI Symbol;Acc:MGI:1920580]	8	1239	0.447942	0	0	0	0	0	0
ENSMUSG00000060715	1700019A02Rik	RIKEN cDNA 1700019A02 gene [Source:MGI Symbol;Acc:MGI:1916647]	1	777	0.397683	2	6	1	0	6	0
ENSMUSG00000109102	1700019A23Rik	RIKEN cDNA 1700019A23 gene [Source:MGI Symbol;Acc:MGI:1915470]	7	196	0.545918	0	0	0	0	0	0
ENSMUSG00000113770	1700019C18Rik	RIKEN cDNA 1700019C18 gene [Source:MGI Symbol;Acc:MGI:1922793]	13	2633	0.472465	0	0	0	1	0	0
ENSMUSG00000043629	1700019D03Rik	RIKEN cDNA 1700019D03 gene [Source:MGI Symbol;Acc:MGI:1914330]	1	4330	0.425404	5	18	9	3	1	1
ENSMUSG00000086202	1700019E08Rik	RIKEN cDNA 1700019E08 gene [Source:MGI Symbol;Acc:MGI:1916655]	2	830	0.431325	0	0	0	0	0	0
ENSMUSG00000107027	1700019F05Rik	RIKEN cDNA 1700019F05 gene [Source:MGI Symbol;Acc:MGI:1916652]	5	533	0.467167	0	0	0	0	0	0
ENSMUSG00000085416	1700019G24Rik	RIKEN cDNA 1700019G24 gene [Source:MGI Symbol;Acc:MGI:1919499]	6	503	0.45328	0	0	0	0	0	0
ENSMUSG00000111489	1700019J19Rik	RIKEN cDNA 1700019J19 gene [Source:MGI Symbol;Acc:MGI:1923662]	9	5324	0.461119	1	0	0	0	1	0
ENSMUSG00000111639	1700019L13Rik	RIKEN cDNA 1700019L13 gene [Source:MGI Symbol;Acc:MGI:1919476]	9	4947	0.554073	0	1	0	0	3	0
ENSMUSG00000059695	1700019M22Rik	RIKEN cDNA 1700019M22 gene [Source:MGI Symbol;Acc:MGI:1916673]	12	354	0.446328	0	0	0	0	0	0
ENSMUSG00000026931	1700019N19Rik	RIKEN cDNA 1700019N19 gene [Source:MGI Symbol;Acc:MGI:1914757]	19	1257	0.5179	2	0	0	0	0	0
ENSMUSG00000099808	1700019P21Rik	RIKEN cDNA 1700019P21 gene [Source:MGI Symbol;Acc:MGI:1922796]	1	411	0.459854	0	0	0	0	0	0
ENSMUSG00000027409	1700020A23Rik	RIKEN cDNA 1700020A23 gene [Source:MGI Symbol;Acc:MGI:1922906]	2	739	0.568336	0	0	0	0	0	0
ENSMUSG00000113628	1700020D12Rik	RIKEN cDNA 1700020D12 gene [Source:MGI Symbol;Acc:MGI:1916687]	12	426	0.478873	0	0	0	0	0	0
ENSMUSG00000110052	1700020G03Rik	RIKEN cDNA 1700020G03 gene [Source:MGI Symbol;Acc:MGI:1921485]	8	889	0.618673	0	0	3	0	0	0
ENSMUSG00000101801	1700020G17Rik	RIKEN cDNA 1700020G17 gene [Source:MGI Symbol;Acc:MGI:1922880]	10	1476	0.466802	0	0	0	0	0	0
ENSMUSG00000013928	1700020L13Rik	RIKEN cDNA 1700020L13 gene [Source:MGI Symbol;Acc:MGI:1922879]	7	2432	0.538651	7	4	3	0	1	0
ENSMUSG00000035085	1700020L24Rik	RIKEN cDNA 1700020L24 gene [Source:MGI Symbol;Acc:MGI:1913580]	11	1050	0.6	0	0	0	0	0	0
ENSMUSG00000100146	1700020M21Rik	RIKEN cDNA 1700020M21 gene [Source:MGI Symbol;Acc:MGI:1923652]	9	644	0.462733	0	0	0	0	0	0
ENSMUSG00000050844	1700020N01Rik	RIKEN cDNA 1700020N01 gene [Source:MGI Symbol;Acc:MGI:1914942]	10	1136	0.46743	5	3	2	13	7	0
ENSMUSG00000059690	1700020N15Rik	RIKEN cDNA 1700020N15 gene [Source:MGI Symbol;Acc:MGI:1922759]	X	525	0.43619	0	0	0	0	0	0
ENSMUSG00000100253	1700020N18Rik	RIKEN cDNA 1700020N18 gene [Source:MGI Symbol;Acc:MGI:1914336]	1	547	0.557587	0	0	0	0	0	0
ENSMUSG00000037535	1700021A07Rik	RIKEN cDNA 1700021A07 gene [Source:MGI Symbol;Acc:MGI:1924174]	10	721	0.493759	0	0	0	0	0	0
ENSMUSG00000105426	1700021F02Rik	RIKEN cDNA 1700021F02 gene [Source:MGI Symbol;Acc:MGI:1922769]	5	350	0.477143	0	0	0	0	0	0
ENSMUSG00000027518	1700021F07Rik	RIKEN cDNA 1700021F07 gene [Source:MGI Symbol;Acc:MGI:1919471]	2	646	0.547988	0	0	0	0	0	0
ENSMUSG00000107053	1700021F13Rik	RIKEN cDNA 1700021F13 gene [Source:MGI Symbol;Acc:MGI:1924176]	5	549	0.468124	0	0	0	0	0	0
ENSMUSG00000112387	1700021G15Rik	RIKEN cDNA 1700021G15 gene [Source:MGI Symbol;Acc:MGI:1920506]	10	528	0.443182	0	0	0	0	0	0
ENSMUSG00000086890	1700021J08Rik	RIKEN cDNA 1700021J08 gene [Source:MGI Symbol;Acc:MGI:1919485]	4	575	0.575652	0	0	0	0	0	0
ENSMUSG00000086955	1700021L23Rik	RIKEN cDNA 1700021L23 gene [Source:MGI Symbol;Acc:MGI:1923660]	4	726	0.506887	0	0	0	0	0	0
ENSMUSG00000087343	1700021N21Rik	RIKEN cDNA 1700021N21 gene [Source:MGI Symbol;Acc:MGI:1916659]	4	904	0.522124	5	2	0	0	0	0
ENSMUSG00000096796	1700021P04Rik	RIKEN cDNA 1700021P04 gene [Source:MGI Symbol;Acc:MGI:1922771]	19	659	0.497724	0	0	0	0	0	0
ENSMUSG00000038165	1700022A21Rik	RIKEN cDNA 1700022A21 gene [Source:MGI Symbol;Acc:MGI:1919502]	5	1448	0.535221	0	0	0	0	0	0
ENSMUSG00000099751	1700022A22Rik	RIKEN cDNA 1700022A22 gene [Source:MGI Symbol;Acc:MGI:1922807]	15	1507	0.436629	0	0	0	0	0	0
ENSMUSG00000099983	1700022E09Rik	RIKEN cDNA 1700022E09 gene [Source:MGI Symbol;Acc:MGI:1922886]	16	666	0.403904	0	0	0	0	0	0
ENSMUSG00000112581	1700022H01Rik	RIKEN cDNA 1700022H01 gene [Source:MGI Symbol;Acc:MGI:1922789]	10	387	0.542636	0	0	0	0	0	0
ENSMUSG00000099360	1700022H16Rik	RIKEN cDNA 1700022H16 gene [Source:MGI Symbol;Acc:MGI:1916670]	12	476	0.468487	0	0	0	0	0	0
ENSMUSG00000028451	1700022I11Rik	RIKEN cDNA 1700022I11 gene [Source:MGI Symbol;Acc:MGI:1914567]	4	4542	0.484808	1	5	8	12	2	1
ENSMUSG00000097523	1700022N22Rik	RIKEN cDNA 1700022N22 gene [Source:MGI Symbol;Acc:MGI:1916681]	17	1632	0.536152	0	3	5	0	12	0
ENSMUSG00000117050	1700023B13Rik	RIKEN cDNA 1700023B13 gene [Source:MGI Symbol;Acc:MGI:1920529]	17	1046	0.594646	0	0	0	0	0	0
ENSMUSG00000087393	1700023C21Rik	RIKEN cDNA 1700023C21 gene [Source:MGI Symbol;Acc:MGI:1920507]	11	389	0.44473	0	0	0	0	0	0
ENSMUSG00000100000	1700023F02Rik	RIKEN cDNA 1700023F02 gene [Source:MGI Symbol;Acc:MGI:1916683]	10	767	0.440678	7	0	2	0	1	2
ENSMUSG00000103503	1700023G09Rik	RIKEN cDNA 1700023G09 gene [Source:MGI Symbol;Acc:MGI:1920531]	1	1460	0.410959	0	0	0	0	0	0
ENSMUSG00000089827	1700023H06Rik	RIKEN cDNA 1700023H06 gene [Source:MGI Symbol;Acc:MGI:1916692]	13	1044	0.429119	1	0	0	1	0	0
ENSMUSG00000052334	1700024B05Rik	RIKEN cDNA 1700024B05 gene [Source:MGI Symbol;Acc:MGI:1922768]	14	1576	0.410533	0	0	0	0	0	0
ENSMUSG00000099994	1700024B18Rik	RIKEN cDNA 1700024B18 gene [Source:MGI Symbol;Acc:MGI:1916643]	14	423	0.434988	0	0	0	0	0	0
ENSMUSG00000072473	1700024G13Rik	RIKEN cDNA 1700024G13 gene [Source:MGI Symbol;Acc:MGI:1914335]	14	850	0.501176	0	0	0	0	0	0
ENSMUSG00000113825	1700024I08Rik	RIKEN cDNA 1700024I08 gene [Source:MGI Symbol;Acc:MGI:1922772]	13	984	0.438008	0	0	0	0	0	0
ENSMUSG00000069890	1700024J04Rik	RIKEN cDNA 1700024J04 gene [Source:MGI Symbol;Acc:MGI:1919098]	11	1821	0.449204	0	0	0	0	0	0
ENSMUSG00000106947	1700025A08Rik	RIKEN cDNA 1700025A08 gene [Source:MGI Symbol;Acc:MGI:1916650]	5	609	0.625616	0	0	0	0	0	0
ENSMUSG00000101113	1700025B11Rik	RIKEN cDNA 1700025B11 gene [Source:MGI Symbol;Acc:MGI:1923659]	15	553	0.455696	0	0	0	0	0	0
ENSMUSG00000078935	1700025C18Rik	RIKEN cDNA 1700025C18 gene [Source:MGI Symbol;Acc:MGI:1919461]	2	702	0.539886	0	0	0	0	0	0
ENSMUSG00000086760	1700025D23Rik	RIKEN cDNA 1700025D23 gene [Source:MGI Symbol;Acc:MGI:1916667]	11	846	0.481087	4	0	0	0	0	0
ENSMUSG00000100558	1700025F24Rik	RIKEN cDNA 1700025F24 gene [Source:MGI Symbol;Acc:MGI:1914331]	10	894	0.473154	0	0	0	0	0	0
ENSMUSG00000032666	1700025G04Rik	RIKEN cDNA 1700025G04 gene [Source:MGI Symbol;Acc:MGI:1916649]	1	11788	0.453936	852	1081	909	1020	1050	822
ENSMUSG00000101888	1700025H01Rik	RIKEN cDNA 1700025H01 gene [Source:MGI Symbol;Acc:MGI:1922781]	16	547	0.548446	0	0	0	0	0	0
ENSMUSG00000108409	1700025J12Rik	RIKEN cDNA 1700025J12 gene [Source:MGI Symbol;Acc:MGI:1916657]	7	630	0.503175	0	0	0	0	0	0
ENSMUSG00000112482	1700025K04Rik	RIKEN cDNA 1700025K04 gene [Source:MGI Symbol;Acc:MGI:1913584]	10	1174	0.402896	0	0	0	0	0	0
ENSMUSG00000099747	1700025K24Rik	RIKEN cDNA 1700025K24 gene [Source:MGI Symbol;Acc:MGI:1916668]	17	740	0.439189	0	0	0	0	0	0
ENSMUSG00000109962	1700025L06Rik	RIKEN cDNA 1700025L06 gene [Source:MGI Symbol;Acc:MGI:1914183]	7	2169	0.537114	0	0	0	0	0	0
ENSMUSG00000100175	1700025M24Rik	RIKEN cDNA 1700025M24 gene [Source:MGI Symbol;Acc:MGI:1919526]	5	772	0.487047	0	0	0	0	0	0
ENSMUSG00000090200	1700025N21Rik	RIKEN cDNA 1700025N21 gene [Source:MGI Symbol;Acc:MGI:1916665]	10	686	0.504373	0	0	0	0	0	0
ENSMUSG00000100121	1700025N23Rik	RIKEN cDNA 1700025N23 gene [Source:MGI Symbol;Acc:MGI:1917236]	6	915	0.500546	0	0	0	0	0	1
ENSMUSG00000028244	1700025O08Rik	RIKEN cDNA 1700025O08 gene [Source:MGI Symbol;Acc:MGI:1917234]	4	456	0.394737	0	0	0	0	0	0
ENSMUSG00000086379	1700026D11Rik	RIKEN cDNA 1700026D11 gene [Source:MGI Symbol;Acc:MGI:1917621]	2	2929	0.499829	0	0	0	0	0	0
ENSMUSG00000101854	1700026F02Rik	RIKEN cDNA 1700026F02 gene [Source:MGI Symbol;Acc:MGI:1916669]	8	1679	0.472901	2	1	0	7	0	6
ENSMUSG00000073976	1700026J12Rik	RIKEN cDNA 1700026J12 gene [Source:MGI Symbol;Acc:MGI:1920505]	16	1155	0.404329	0	0	0	0	0	0
ENSMUSG00000097716	1700026J14Rik	RIKEN cDNA 1700026J14 gene [Source:MGI Symbol;Acc:MGI:1916682]	6	794	0.518892	1	3	7	0	4	5
ENSMUSG00000114681	1700026N04Rik	RIKEN cDNA 1700026N04 gene [Source:MGI Symbol;Acc:MGI:1919521]	13	643	0.589425	4	4	2	0	0	2
ENSMUSG00000084864	1700027A07Rik	RIKEN cDNA 1700027A07 gene [Source:MGI Symbol;Acc:MGI:1917246]	15	458	0.5	0	0	0	0	0	0
ENSMUSG00000101968	1700027A15Rik	RIKEN cDNA 1700027A15 gene [Source:MGI Symbol;Acc:MGI:1916699]	1	1396	0.482808	0	1	0	0	0	0
ENSMUSG00000107737	1700027F06Rik	RIKEN cDNA 1700027F06 gene [Source:MGI Symbol;Acc:MGI:1919518]	6	243	0.506173	0	0	0	0	0	0
ENSMUSG00000100911	1700027F09Rik	RIKEN cDNA 1700027F09 gene [Source:MGI Symbol;Acc:MGI:1917249]	5	767	0.436767	0	0	0	0	0	0
ENSMUSG00000100799	1700027H10Rik	RIKEN cDNA 1700027H10 gene [Source:MGI Symbol;Acc:MGI:1919524]	3	584	0.421233	0	0	0	0	0	0
ENSMUSG00000098304	1700027I24Rik	RIKEN cDNA 1700027I24 gene [Source:MGI Symbol;Acc:MGI:1922817]	9	696	0.395115	1	0	0	0	0	0
ENSMUSG00000111422	1700027J07Rik	RIKEN cDNA 1700027J07 gene [Source:MGI Symbol;Acc:MGI:1916693]	10	2782	0.489216	0	0	0	0	0	0
ENSMUSG00000099417	1700028B04Rik	RIKEN cDNA 1700028B04 gene [Source:MGI Symbol;Acc:MGI:1917251]	7	971	0.54171	0	0	0	0	0	0
ENSMUSG00000101683	1700028D13Rik	RIKEN cDNA 1700028D13 gene [Source:MGI Symbol;Acc:MGI:1922819]	5	718	0.523677	0	0	0	0	0	0
ENSMUSG00000097321	1700028E10Rik	RIKEN cDNA 1700028E10 gene [Source:MGI Symbol;Acc:MGI:1916713]	5	6927	0.4507	49	47	51	33	43	16
ENSMUSG00000056821	1700028I16Rik	RIKEN cDNA 1700028I16 gene [Source:MGI Symbol;Acc:MGI:1917253]	10	1056	0.534091	0	0	0	0	0	0
ENSMUSG00000038782	1700028J19Rik	RIKEN cDNA 1700028J19 gene [Source:MGI Symbol;Acc:MGI:1917254]	7	2471	0.503035	0	4	0	1	3	4
ENSMUSG00000089798	1700028K03Rik	RIKEN cDNA 1700028K03 gene [Source:MGI Symbol;Acc:MGI:1923671]	5	7963	0.402612	3	4	8	0	1	1
ENSMUSG00000101334	1700028M03Rik	RIKEN cDNA 1700028M03 gene [Source:MGI Symbol;Acc:MGI:1916710]	3	476	0.468487	0	0	0	0	0	0
ENSMUSG00000078635	1700028N14Rik	RIKEN cDNA 1700028N14 gene [Source:MGI Symbol;Acc:MGI:1920530]	11	747	0.570281	1	21	16	0	5	1
ENSMUSG00000033053	1700028P14Rik	RIKEN cDNA 1700028P14 gene [Source:MGI Symbol;Acc:MGI:1914733]	19	875	0.460571	0	0	0	0	0	0
ENSMUSG00000086823	1700028P15Rik	RIKEN cDNA 1700028P15 gene [Source:MGI Symbol;Acc:MGI:1922905]	2	3553	0.449761	0	0	0	0	0	0
ENSMUSG00000100759	1700029B22Rik	RIKEN cDNA 1700029B22 gene [Source:MGI Symbol;Acc:MGI:1916745]	7	699	0.484979	0	0	0	0	0	0
ENSMUSG00000102834	1700029B24Rik	RIKEN cDNA 1700029B24 gene [Source:MGI Symbol;Acc:MGI:1919533]	3	497	0.444668	0	0	0	0	0	0
ENSMUSG00000100557	1700029E06Rik	RIKEN cDNA 1700029E06 gene [Source:MGI Symbol;Acc:MGI:1919500]	5	757	0.418758	0	0	0	0	0	0
ENSMUSG00000052075	1700029F12Rik	RIKEN cDNA 1700029F12 gene [Source:MGI Symbol;Acc:MGI:1913729]	13	1140	0.504386	2	0	0	0	0	0
ENSMUSG00000031452	1700029H14Rik	RIKEN cDNA 1700029H14 gene [Source:MGI Symbol;Acc:MGI:1913751]	8	1421	0.546094	11	0	0	2	0	0
ENSMUSG00000044916	1700029I15Rik	RIKEN cDNA 1700029I15 gene [Source:MGI Symbol;Acc:MGI:1916742]	2	1348	0.549703	7	1	9	5	8	0
ENSMUSG00000099968	1700029J03Rik	RIKEN cDNA 1700029J03 gene [Source:MGI Symbol;Acc:MGI:1919514]	16	1527	0.499673	0	0	0	0	0	0
ENSMUSG00000071103	1700029J07Rik	RIKEN cDNA 1700029J07 gene [Source:MGI Symbol;Acc:MGI:1916729]	8	3006	0.452096	81	114	107	102	78	54
ENSMUSG00000101189	1700029M03Rik	RIKEN cDNA 1700029M03 gene [Source:MGI Symbol;Acc:MGI:1916726]	1	685	0.414599	0	0	0	0	0	0
ENSMUSG00000086788	1700029M20Rik	RIKEN cDNA 1700029M20 gene [Source:MGI Symbol;Acc:MGI:1913597]	4	3024	0.503307	0	0	0	0	0	0
ENSMUSG00000098144	1700029N11Rik	RIKEN cDNA 1700029N11 gene [Source:MGI Symbol;Acc:MGI:1916741]	13	1248	0.463942	0	0	0	0	0	0
ENSMUSG00000085333	1700030A11Rik	RIKEN cDNA 1700030A11 gene [Source:MGI Symbol;Acc:MGI:1921429]	17	888	0.488739	0	0	0	0	0	0
ENSMUSG00000099759	1700030C10Rik	RIKEN cDNA 1700030C10 gene [Source:MGI Symbol;Acc:MGI:1916763]	12	1735	0.536599	25	102	40	17	30	21
ENSMUSG00000091071	1700030C10Rik	RIKEN cDNA 1700030C10 gene [Source:MGI Symbol;Acc:MGI:1916763]	12	1471	0.586676	25	21	9	5	5	7
ENSMUSG00000086459	1700030C12Rik	RIKEN cDNA 1700030C12 gene [Source:MGI Symbol;Acc:MGI:1919496]	11	1169	0.457656	0	3	0	0	0	0
ENSMUSG00000087148	1700030C14Rik	RIKEN cDNA 1700030C14 gene [Source:MGI Symbol;Acc:MGI:1922912]	2	756	0.531746	0	0	0	0	0	0
ENSMUSG00000112619	1700030E10Rik	RIKEN cDNA 1700030E10 gene [Source:MGI Symbol;Acc:MGI:1916765]	10	721	0.474341	0	0	0	0	0	0
ENSMUSG00000099869	1700030F04Rik	RIKEN cDNA 1700030F04 gene [Source:MGI Symbol;Acc:MGI:1919513]	6	802	0.478803	0	0	0	0	0	0
ENSMUSG00000103387	1700030I03Rik	RIKEN cDNA 1700030I03 gene [Source:MGI Symbol;Acc:MGI:1916753]	12	942	0.485138	15	0	7	0	2	1
ENSMUSG00000031847	1700030J22Rik	RIKEN cDNA 1700030J22 gene [Source:MGI Symbol;Acc:MGI:1916778]	8	2996	0.517023	31	14	14	36	25	22
ENSMUSG00000052794	1700030K09Rik	RIKEN cDNA 1700030K09 gene [Source:MGI Symbol;Acc:MGI:1919504]	8	2970	0.515488	50	50	85	104	55	40
ENSMUSG00000099508	1700030L20Rik	RIKEN cDNA 1700030L20 gene [Source:MGI Symbol;Acc:MGI:1917305]	3	985	0.434518	0	0	0	0	0	0
ENSMUSG00000113179	1700030L22Rik	RIKEN cDNA 1700030L22 gene [Source:MGI Symbol;Acc:MGI:1922826]	12	865	0.43237	0	0	0	0	0	0
ENSMUSG00000097424	1700030M09Rik	RIKEN cDNA 1700030M09 gene [Source:MGI Symbol;Acc:MGI:1919509]	8	1102	0.539927	0	0	0	0	0	0
ENSMUSG00000100969	1700030N03Rik	RIKEN cDNA 1700030N03 gene [Source:MGI Symbol;Acc:MGI:1917261]	19	5310	0.458569	0	0	0	0	0	0
ENSMUSG00000106800	1700030N18Rik	RIKEN cDNA 1700030N18 gene [Source:MGI Symbol;Acc:MGI:1917266]	5	966	0.494824	0	0	0	0	0	0
ENSMUSG00000100198	1700030O20Rik	RIKEN cDNA 1700030O20 gene [Source:MGI Symbol;Acc:MGI:1919536]	10	594	0.491582	4	0	0	0	0	0
ENSMUSG00000092239	1700031A10Rik	RIKEN cDNA 1700031A10 gene [Source:MGI Symbol;Acc:MGI:1920536]	17	656	0.492378	0	0	0	0	0	0
ENSMUSG00000032894	1700031F05Rik	RIKEN cDNA 1700031F05 gene [Source:MGI Symbol;Acc:MGI:1920550]	X	1444	0.488227	0	0	0	0	0	0
ENSMUSG00000047046	1700031F10Rik	RIKEN cDNA 1700031F10 gene [Source:MGI Symbol;Acc:MGI:1920567]	6	639	0.549296	1	0	0	0	0	0
ENSMUSG00000099863	1700031L13Rik	RIKEN cDNA 1700031L13 gene [Source:MGI Symbol;Acc:MGI:1914577]	5	960	0.361458	0	0	0	0	0	0
ENSMUSG00000099353	1700031M16Rik	RIKEN cDNA 1700031M16 gene [Source:MGI Symbol;Acc:MGI:1920552]	15	1666	0.455582	0	0	0	0	0	0
ENSMUSG00000100315	1700031P21Rik	RIKEN cDNA 1700031P21 gene [Source:MGI Symbol;Acc:MGI:1920528]	12	568	0.443662	0	0	0	0	0	0
ENSMUSG00000097302	1700034B16Rik	RIKEN cDNA 1700034B16 gene [Source:MGI Symbol;Acc:MGI:1920532]	18	722	0.51108	0	0	0	0	0	0
ENSMUSG00000024532	1700034E13Rik	RIKEN cDNA 1700034E13 gene [Source:MGI Symbol;Acc:MGI:1925664]	18	490	0.446939	0	0	0	0	0	0
ENSMUSG00000097962	1700034G24Rik	RIKEN cDNA 1700034G24 gene [Source:MGI Symbol;Acc:MGI:1914575]	5	1081	0.53284	0	0	0	0	0	0
ENSMUSG00000055833	1700034H15Rik	RIKEN cDNA 1700034H15 gene [Source:MGI Symbol;Acc:MGI:1921515]	1	6099	0.496475	10	16	29	7	4	4
ENSMUSG00000074619	1700034I23Rik	RIKEN cDNA 1700034I23 gene [Source:MGI Symbol;Acc:MGI:1920547]	3	2348	0.441227	0	0	0	0	0	0
ENSMUSG00000103287	1700034J04Rik	RIKEN cDNA 1700034J04 gene [Source:MGI Symbol;Acc:MGI:1920554]	12	750	0.492	0	0	0	0	0	0
ENSMUSG00000040163	1700034J05Rik	RIKEN cDNA 1700034J05 gene [Source:MGI Symbol;Acc:MGI:1920594]	6	3007	0.440306	6	0	0	0	0	0
ENSMUSG00000100294	1700034K08Rik	RIKEN cDNA 1700034K08 gene [Source:MGI Symbol;Acc:MGI:1925599]	9	824	0.436893	0	0	0	0	0	0
ENSMUSG00000097893	1700034P13Rik	RIKEN cDNA 1700034P13 gene [Source:MGI Symbol;Acc:MGI:1920581]	1	3101	0.501774	1	6	1	1	0	1
ENSMUSG00000095956	1700036A12Rik	RIKEN cDNA 1700036A12 gene [Source:MGI Symbol;Acc:MGI:1920548]	9	1828	0.502735	3	1	1	0	0	0
ENSMUSG00000099995	1700036G14Rik	RIKEN cDNA 1700036G14 gene [Source:MGI Symbol;Acc:MGI:1920533]	3	542	0.472325	0	0	0	0	0	0
ENSMUSG00000086185	1700036O09Rik	RIKEN cDNA 1700036O09 gene [Source:MGI Symbol;Acc:MGI:1920512]	X	349	0.346705	0	0	0	0	0	0
ENSMUSG00000085542	1700037C06Rik	RIKEN cDNA 1700037C06 gene [Source:MGI Symbol;Acc:MGI:1921513]	4	874	0.516018	0	0	0	0	0	0
ENSMUSG00000005983	1700037C18Rik	RIKEN cDNA 1700037C18 gene [Source:MGI Symbol;Acc:MGI:1920511]	16	3227	0.537031	2	13	8	14	11	10
ENSMUSG00000114125	1700037F03Rik	RIKEN cDNA 1700037F03 gene [Source:MGI Symbol;Acc:MGI:1914566]	13	365	0.463014	3	11	7	24	4	1
ENSMUSG00000027327	1700037H04Rik	RIKEN cDNA 1700037H04 gene [Source:MGI Symbol;Acc:MGI:1914576]	2	2286	0.552931	118	231	170	290	178	173
ENSMUSG00000092369	1700039E22Rik	RIKEN cDNA 1700039E22 gene [Source:MGI Symbol;Acc:MGI:1920572]	19	770	0.574026	0	0	0	0	0	0
ENSMUSG00000102536	1700039I01Rik	RIKEN cDNA 1700039I01 gene [Source:MGI Symbol;Acc:MGI:1920596]	1	479	0.592902	0	0	0	0	0	0
ENSMUSG00000097933	1700039M10Rik	RIKEN cDNA 1700039M10 gene [Source:MGI Symbol;Acc:MGI:1914768]	14	532	0.37594	0	0	0	0	0	0
ENSMUSG00000104086	1700039M15Rik	RIKEN cDNA 1700039M15 gene [Source:MGI Symbol;Acc:MGI:1921516]	9	1120	0.457143	0	0	0	0	0	0
ENSMUSG00000097515	1700040D17Rik	RIKEN cDNA 1700040D17 gene [Source:MGI Symbol;Acc:MGI:1923852]	3	998	0.435872	0	0	4	0	0	1
ENSMUSG00000113997	1700040E09Rik	RIKEN cDNA 1700040E09 gene [Source:MGI Symbol;Acc:MGI:1924240]	12	606	0.410891	0	0	0	0	0	0
ENSMUSG00000100667	1700040F15Rik	RIKEN cDNA 1700040F15 gene [Source:MGI Symbol;Acc:MGI:1920579]	Y	931	0.351235	0	0	0	0	0	0
ENSMUSG00000101568	1700040F17Rik	RIKEN cDNA 1700040F17 gene [Source:MGI Symbol;Acc:MGI:1920584]	15	817	0.423501	0	0	0	0	0	0
ENSMUSG00000103840	1700040K01Rik	RIKEN cDNA 1700040K01 gene [Source:MGI Symbol;Acc:MGI:1920517]	1	438	0.452055	0	0	0	0	0	0
ENSMUSG00000107406	1700040L08Rik	RIKEN cDNA 1700040L08 gene [Source:MGI Symbol;Acc:MGI:1920544]	6	541	0.441774	0	0	0	0	0	0
ENSMUSG00000116260	1700041B01Rik	RIKEN cDNA 1700041B01 gene [Source:MGI Symbol;Acc:MGI:1925873]	15	503	0.580517	0	0	0	0	0	0
ENSMUSG00000100282	1700041C23Rik	RIKEN cDNA 1700041C23 gene [Source:MGI Symbol;Acc:MGI:1914569]	9	395	0.379747	0	0	0	0	0	0
ENSMUSG00000054822	1700041G16Rik	RIKEN cDNA 1700041G16 gene [Source:MGI Symbol;Acc:MGI:1920549]	8	1824	0.501096	0	0	1	0	0	0
ENSMUSG00000104845	1700041I07Rik	RIKEN cDNA 1700041I07 gene [Source:MGI Symbol;Acc:MGI:1920523]	5	435	0.505747	0	0	0	0	0	0
ENSMUSG00000087010	1700041M05Rik	RIKEN cDNA 1700041M05 gene [Source:MGI Symbol;Acc:MGI:1920510]	4	306	0.493464	0	0	0	0	0	0
ENSMUSG00000100857	1700041M19Rik	RIKEN cDNA 1700041M19 gene [Source:MGI Symbol;Acc:MGI:1923851]	16	2947	0.425178	0	0	0	0	0	0
ENSMUSG00000105991	1700042D02Rik	RIKEN cDNA 1700042D02 gene [Source:MGI Symbol;Acc:MGI:1920587]	9	389	0.44473	0	0	0	0	0	0
ENSMUSG00000078593	1700042G07Rik	RIKEN cDNA 1700042G07 gene [Source:MGI Symbol;Acc:MGI:1914573]	4	385	0.574026	0	0	0	0	0	0
ENSMUSG00000087044	1700042G15Rik	RIKEN cDNA 1700042G15 gene [Source:MGI Symbol;Acc:MGI:1920599]	4	664	0.533133	0	0	0	0	0	0
ENSMUSG00000112878	1700042O05Rik	RIKEN cDNA 1700042O05 gene [Source:MGI Symbol;Acc:MGI:1920540]	10	584	0.40411	0	0	0	0	0	0
ENSMUSG00000086391	1700042O10Rik	RIKEN cDNA 1700042O10 gene [Source:MGI Symbol;Acc:MGI:1920571]	11	1075	0.466977	0	0	0	0	0	0
ENSMUSG00000099911	1700044C05Rik	RIKEN cDNA 1700044C05 gene [Source:MGI Symbol;Acc:MGI:1920556]	14	898	0.453229	0	0	0	0	0	0
ENSMUSG00000100297	1700044K03Rik	RIKEN cDNA 1700044K03 gene [Source:MGI Symbol;Acc:MGI:1914571]	18	377	0.408488	0	0	0	0	0	0
ENSMUSG00000078492	1700045H11Rik	RIKEN cDNA 1700045H11 gene [Source:MGI Symbol;Acc:MGI:1920598]	4	593	0.485666	0	0	0	0	0	0
ENSMUSG00000104526	1700045I11Rik	RIKEN cDNA 1700045I11 gene [Source:MGI Symbol;Acc:MGI:1920600]	4	493	0.602434	0	0	0	0	0	0
ENSMUSG00000085561	1700046C09Rik	RIKEN cDNA 1700046C09 gene [Source:MGI Symbol;Acc:MGI:1920557]	11	543	0.410681	0	0	0	0	0	0
ENSMUSG00000085437	1700047A11Rik	RIKEN cDNA 1700047A11 gene [Source:MGI Symbol;Acc:MGI:1923854]	8	821	0.439708	0	0	0	0	0	0
ENSMUSG00000115294	1700047E10Rik	RIKEN cDNA 1700047E10 gene [Source:MGI Symbol;Acc:MGI:1921578]	14	568	0.498239	0	0	0	0	0	0
ENSMUSG00000085549	1700047F07Rik	RIKEN cDNA 1700047F07 gene [Source:MGI Symbol;Acc:MGI:1920570]	4	1050	0.50381	0	1	0	0	0	0
ENSMUSG00000099349	1700047G03Rik	RIKEN cDNA 1700047G03 gene [Source:MGI Symbol;Acc:MGI:1920589]	15	1493	0.486269	0	0	0	0	0	0
ENSMUSG00000110717	1700047G07Rik	RIKEN cDNA 1700047G07 gene [Source:MGI Symbol;Acc:MGI:1920573]	8	902	0.44235	0	0	0	0	0	0
ENSMUSG00000087347	1700047K16Rik	RIKEN cDNA 1700047K16 gene [Source:MGI Symbol;Acc:MGI:1920585]	11	886	0.513544	0	0	8	0	0	1
ENSMUSG00000101762	1700047L14Rik	RIKEN cDNA 1700047L14 gene [Source:MGI Symbol;Acc:MGI:1920545]	5	511	0.418787	0	0	0	0	0	0
ENSMUSG00000100147	1700047M11Rik	RIKEN cDNA 1700047M11 gene [Source:MGI Symbol;Acc:MGI:1914580]	1	2846	0.455727	0	0	1	0	0	0
ENSMUSG00000102356	1700047N06Rik	RIKEN cDNA 1700047N06 gene [Source:MGI Symbol;Acc:MGI:1923853]	1	920	0.388043	0	0	0	0	0	0
ENSMUSG00000109594	1700047O18Rik	RIKEN cDNA 1700047O18 gene [Source:MGI Symbol;Acc:MGI:1920668]	7	743	0.429341	0	0	0	0	0	0
ENSMUSG00000105274	1700048F04Rik	RIKEN cDNA 1700048F04 gene [Source:MGI Symbol;Acc:MGI:1920646]	5	1064	0.460526	0	0	0	0	0	0
ENSMUSG00000085637	1700048M11Rik	RIKEN cDNA 1700048M11 gene [Source:MGI Symbol;Acc:MGI:1920636]	16	485	0.478351	5	0	0	0	0	0
ENSMUSG00000118016	1700048O14Rik	RIKEN cDNA 1700048O14 gene [Source:MGI Symbol;Acc:MGI:1920683]	19	521	0.424184	0	0	0	0	0	0
ENSMUSG00000043773	1700048O20Rik	RIKEN cDNA 1700048O20 gene [Source:MGI Symbol;Acc:MGI:1920637]	9	2099	0.45879	2	1	13	0	1	0
ENSMUSG00000112333	1700048P04Rik	RIKEN cDNA 1700048P04 gene [Source:MGI Symbol;Acc:MGI:1920605]	10	369	0.485095	0	0	0	0	0	0
ENSMUSG00000085077	1700049E15Rik	RIKEN cDNA 1700049E15 gene [Source:MGI Symbol;Acc:MGI:1920644]	6	1047	0.484241	0	0	0	0	0	0
ENSMUSG00000079271	1700049E17Rik1	RIKEN cDNA 1700049E17 gene, gene 1 [Source:MGI Symbol;Acc:MGI:1920665]	14	1761	0.375355	0	0	0	0	0	0
ENSMUSG00000090440	1700049E17Rik2	tandem duplication of RIKEN cDNA 1700049E17 gene, gene 2 [Source:MGI Symbol;Acc:MGI:3796510]	14	1757	0.376209	0	0	0	0	0	0
ENSMUSG00000101553	1700049E22Rik	RIKEN cDNA 1700049E22 gene [Source:MGI Symbol;Acc:MGI:1920645]	6	507	0.532544	0	0	0	0	0	0
ENSMUSG00000043859	1700049L16Rik	RIKEN cDNA 1700049L16 gene [Source:MGI Symbol;Acc:MGI:1920633]	10	543	0.500921	0	0	0	0	0	0
ENSMUSG00000086951	1700051A21Rik	RIKEN cDNA 1700051A21 gene [Source:MGI Symbol;Acc:MGI:1920616]	11	1800	0.536111	0	0	0	0	0	0
ENSMUSG00000108263	1700051K13Rik	RIKEN cDNA 1700051K13 gene [Source:MGI Symbol;Acc:MGI:1920602]	6	696	0.41092	0	0	0	0	0	0
ENSMUSG00000103341	1700051O22Rik	RIKEN cDNA 1700051O22 Gene [Source:MGI Symbol;Acc:MGI:3704315]	8	638	0.556426	0	0	0	2	0	2
ENSMUSG00000105297	1700052H01Rik	RIKEN cDNA 1700052H01 gene [Source:MGI Symbol;Acc:MGI:1920712]	3	1025	0.470244	0	0	0	0	0	0
ENSMUSG00000101912	1700052I22Rik	RIKEN cDNA 1700052I22 gene [Source:MGI Symbol;Acc:MGI:1914590]	12	379	0.46438	0	0	0	0	0	0
ENSMUSG00000099681	1700052K11Rik	RIKEN cDNA 1700052K11 gene [Source:MGI Symbol;Acc:MGI:1920681]	11	3708	0.488943	42	41	41	57	81	33
ENSMUSG00000099988	1700054A03Rik	RIKEN cDNA 1700054A03 gene [Source:MGI Symbol;Acc:MGI:1925707]	19	4290	0.47296	0	2	2	0	1	2
ENSMUSG00000097001	1700054K02Rik	RIKEN cDNA 1700054K02 gene [Source:MGI Symbol;Acc:MGI:1925600]	1	376	0.470745	0	0	0	0	0	0
ENSMUSG00000100219	1700054K19Rik	RIKEN cDNA 1700054K19 gene [Source:MGI Symbol;Acc:MGI:1914586]	6	452	0.45354	0	0	0	0	0	0
ENSMUSG00000085889	1700054M17Rik	RIKEN cDNA 1700054M17 gene [Source:MGI Symbol;Acc:MGI:1920608]	2	445	0.478652	0	0	0	2	0	0
ENSMUSG00000111753	1700054O05Rik	RIKEN cDNA 1700054O05 gene [Source:MGI Symbol;Acc:MGI:1920606]	10	555	0.502703	0	0	0	0	0	0
ENSMUSG00000104183	1700054O19Rik	RIKEN cDNA 1700054O19 gene [Source:MGI Symbol;Acc:MGI:1921522]	14	868	0.47235	7	3	5	2	0	0
ENSMUSG00000093616	1700055C04Rik	RIKEN cDNA 1700055C04 gene [Source:MGI Symbol;Acc:MGI:1920647]	9	355	0.549296	0	0	0	0	0	0
ENSMUSG00000070997	1700055D18Rik	RIKEN cDNA 1700055D18 gene [Source:MGI Symbol;Acc:MGI:1920655]	4	3720	0.49328	15	16	15	27	30	14
ENSMUSG00000044854	1700056E22Rik	RIKEN cDNA 1700056E22 gene [Source:MGI Symbol;Acc:MGI:1920613]	1	1272	0.628931	1	0	0	1	11	0
ENSMUSG00000084792	1700056N10Rik	RIKEN cDNA 1700056N10 gene [Source:MGI Symbol;Acc:MGI:1920642]	16	1043	0.471716	12	5	12	16	14	10
ENSMUSG00000074139	1700057G04Rik	RIKEN cDNA 1700057G04 gene [Source:MGI Symbol;Acc:MGI:1925709]	9	1974	0.448835	0	0	0	0	0	0
ENSMUSG00000084757	1700057H15Rik	RIKEN cDNA 1700057H15 gene [Source:MGI Symbol;Acc:MGI:1925710]	4	1252	0.515974	0	0	0	0	0	0
ENSMUSG00000086007	1700057H21Rik	RIKEN cDNA 1700057H21 gene [Source:MGI Symbol;Acc:MGI:1920625]	2	697	0.464849	0	0	0	0	0	0
ENSMUSG00000089636	1700058P15Rik	RIKEN cDNA 1700058P15 gene [Source:MGI Symbol;Acc:MGI:1920627]	7	413	0.479419	0	0	0	3	0	0
ENSMUSG00000086887	1700060C16Rik	RIKEN cDNA 1700060C16 gene [Source:MGI Symbol;Acc:MGI:1920675]	6	645	0.496124	0	0	0	0	0	0
ENSMUSG00000078957	1700060C20Rik	RIKEN cDNA 1700060C20 gene [Source:MGI Symbol;Acc:MGI:1920649]	2	605	0.52562	0	0	0	0	0	0
ENSMUSG00000084970	1700060J05Rik	RIKEN cDNA 1700060J05 gene [Source:MGI Symbol;Acc:MGI:1920641]	4	1060	0.471698	0	0	0	0	0	0
ENSMUSG00000099407	1700060O08Rik	RIKEN cDNA 1700060O08 gene [Source:MGI Symbol;Acc:MGI:1914585]	12	281	0.469751	0	0	0	0	3	0
ENSMUSG00000117966	1700061A03Rik	RIKEN cDNA 1700061A03 gene [Source:MGI Symbol;Acc:MGI:1920664]	19	455	0.536264	0	0	0	0	0	0
ENSMUSG00000102060	1700061E17Rik	RIKEN cDNA 1700061E17 gene [Source:MGI Symbol;Acc:MGI:3642196]	9	1067	0.499531	0	0	0	0	0	0
ENSMUSG00000085759	1700061E18Rik	RIKEN cDNA 1700061E18 gene [Source:MGI Symbol;Acc:MGI:1924241]	13	588	0.460884	0	0	0	0	0	0
ENSMUSG00000085580	1700061F12Rik	RIKEN cDNA 1700061F12 gene [Source:MGI Symbol;Acc:MGI:1920688]	2	876	0.438356	0	0	0	0	0	0
ENSMUSG00000084948	1700061H18Rik	RIKEN cDNA 1700061H18 gene [Source:MGI Symbol;Acc:MGI:1920711]	18	1081	0.398705	0	0	0	0	0	0
ENSMUSG00000028009	1700061I17Rik	RIKEN cDNA 1700061I17 gene [Source:MGI Symbol;Acc:MGI:1920612]	3	1962	0.448522	0	0	0	0	0	0
ENSMUSG00000086366	1700061J23Rik	RIKEN cDNA 1700061J23 gene [Source:MGI Symbol;Acc:MGI:1924243]	11	537	0.469274	0	0	0	0	0	0
ENSMUSG00000110464	1700061N14Rik	RIKEN cDNA 1700061N14 gene [Source:MGI Symbol;Acc:MGI:1920682]	8	463	0.479482	0	0	0	0	0	0
ENSMUSG00000114390	1700062C10Rik	RIKEN cDNA 1700062C10 gene [Source:MGI Symbol;Acc:MGI:1920690]	14	1659	0.414105	0	0	0	0	0	1
ENSMUSG00000100062	1700063A18Rik	RIKEN cDNA 1700063A18 gene [Source:MGI Symbol;Acc:MGI:1920704]	1	356	0.426966	0	0	0	0	0	0
ENSMUSG00000100837	1700063D05Rik	RIKEN cDNA 1700063D05 gene [Source:MGI Symbol;Acc:MGI:1925750]	9	1529	0.489209	0	0	0	0	1	0
ENSMUSG00000040657	1700063H04Rik	RIKEN cDNA 1700063H04 gene [Source:MGI Symbol;Acc:MGI:1921519]	6	817	0.501836	0	0	0	0	0	0
ENSMUSG00000099266	1700063H06Rik	RIKEN cDNA 1700063H06 gene [Source:MGI Symbol;Acc:MGI:1920614]	9	445	0.388764	0	0	0	0	0	0
ENSMUSG00000103463	1700063I16Rik	RIKEN cDNA 1700063I16 gene [Source:MGI Symbol;Acc:MGI:1925877]	1	611	0.481178	0	0	0	0	0	0
ENSMUSG00000117080	1700063J08Rik	RIKEN cDNA 1700063J08 gene [Source:MGI Symbol;Acc:MGI:1920700]	17	554	0.554152	0	0	3	18	0	3
ENSMUSG00000102036	1700063K16Rik	RIKEN cDNA 1700063K16 gene [Source:MGI Symbol;Acc:MGI:1923860]	16	1203	0.413965	0	0	0	0	0	0
ENSMUSG00000101978	1700063O14Rik	RIKEN cDNA 1700063O14 gene [Source:MGI Symbol;Acc:MGI:1920702]	5	492	0.457317	0	0	0	0	0	0
ENSMUSG00000082766	1700064H15Rik	RIKEN cDNA 1700064H15 gene [Source:MGI Symbol;Acc:MGI:1920674]	3	394	0.456853	0	0	0	0	0	0
ENSMUSG00000100681	1700064J06Rik	RIKEN cDNA 1700064J06 gene [Source:MGI Symbol;Acc:MGI:1920650]	10	386	0.476684	0	0	0	0	0	0
ENSMUSG00000100211	1700064M15Rik	RIKEN cDNA 1700064M15 gene [Source:MGI Symbol;Acc:MGI:1920707]	12	645	0.505426	0	0	1	0	0	0
ENSMUSG00000096655	1700065D16Rik	RIKEN cDNA 1700065D16 gene [Source:MGI Symbol;Acc:MGI:1920660]	9	2905	0.521859	3	2	0	0	0	1
ENSMUSG00000099435	1700065I16Rik	RIKEN cDNA 1700065I16 gene [Source:MGI Symbol;Acc:MGI:1925712]	15	997	0.560682	0	0	0	0	0	0
ENSMUSG00000107341	1700065J11Rik	RIKEN cDNA 1700065J11 gene [Source:MGI Symbol;Acc:MGI:1920659]	6	424	0.471698	0	0	0	0	0	0
ENSMUSG00000100872	1700065J18Rik	RIKEN cDNA 1700065J18 gene [Source:MGI Symbol;Acc:MGI:1920705]	1	393	0.483461	0	0	0	0	0	0
ENSMUSG00000107408	1700065L07Rik	RIKEN cDNA 1700065L07 gene [Source:MGI Symbol;Acc:MGI:1920658]	6	614	0.47557	0	0	0	0	0	0
ENSMUSG00000100134	1700065O20Rik	RIKEN cDNA 1700065O20 gene [Source:MGI Symbol;Acc:MGI:1923859]	18	710	0.412676	0	0	0	0	0	0
ENSMUSG00000101634	1700066B17Rik	RIKEN cDNA 1700066B17 gene [Source:MGI Symbol;Acc:MGI:1920676]	1	1068	0.465356	0	0	0	0	0	0
ENSMUSG00000073598	1700066B19Rik	RIKEN cDNA 1700066B19 gene [Source:MGI Symbol;Acc:MGI:1920699]	18	2837	0.542122	6	0	0	1	0	4
ENSMUSG00000101810	1700066C05Rik	RIKEN cDNA 1700066C05 gene [Source:MGI Symbol;Acc:MGI:1925904]	16	407	0.493857	0	0	0	0	0	0
ENSMUSG00000097717	1700066J03Rik	RIKEN cDNA 1700066J03 gene [Source:MGI Symbol;Acc:MGI:1914589]	13	850	0.502353	0	0	0	0	0	0
ENSMUSG00000038323	1700066M21Rik	RIKEN cDNA 1700066M21 gene [Source:MGI Symbol;Acc:MGI:1920717]	1	3235	0.411747	38	47	28	75	40	44
ENSMUSG00000099605	1700066N21Rik	RIKEN cDNA 1700066N21 gene [Source:MGI Symbol;Acc:MGI:1920721]	5	783	0.404853	0	0	0	0	0	0
ENSMUSG00000085800	1700066O22Rik	RIKEN cDNA 1700066O22 gene [Source:MGI Symbol;Acc:MGI:1920651]	18	2146	0.437558	0	0	0	0	0	0
ENSMUSG00000099378	1700067G17Rik	RIKEN cDNA 1700067G17 gene [Source:MGI Symbol;Acc:MGI:1920725]	1	603	0.475954	0	0	0	0	0	0
ENSMUSG00000046408	1700067K01Rik	RIKEN cDNA 1700067K01 gene [Source:MGI Symbol;Acc:MGI:1920703]	8	1957	0.586101	0	0	0	0	2	0
ENSMUSG00000021545	1700067P10Rik	RIKEN cDNA 1700067P10 gene [Source:MGI Symbol;Acc:MGI:1915474]	17	1437	0.506611	0	0	0	0	0	0
ENSMUSG00000053081	1700069B07Rik	RIKEN cDNA 1700069B07 gene [Source:MGI Symbol;Acc:MGI:1923863]	7	939	0.619808	0	0	3	0	0	1
ENSMUSG00000042184	1700069L16Rik	RIKEN cDNA 1700069L16 gene [Source:MGI Symbol;Acc:MGI:1920726]	5	1520	0.521711	0	0	0	0	0	0
ENSMUSG00000107637	1700069P05Rik	RIKEN cDNA 1700069P05 gene [Source:MGI Symbol;Acc:MGI:1920781]	6	785	0.50828	0	0	0	0	0	0
ENSMUSG00000086376	1700071G01Rik	RIKEN cDNA 1700071G01 gene [Source:MGI Symbol;Acc:MGI:1920735]	5	367	0.452316	0	0	0	0	0	0
ENSMUSG00000080980	1700071K01Rik	RIKEN cDNA 1700071K01 gene [Source:MGI Symbol;Acc:MGI:3588264]	11	819	0.545788	1	0	0	2	1	0
ENSMUSG00000090307	1700071M16Rik	RIKEN cDNA 1700071M16 gene [Source:MGI Symbol;Acc:MGI:1920754]	17	2883	0.42768	0	0	0	2	0	0
ENSMUSG00000100487	1700072B07Rik	RIKEN cDNA 1700072B07 gene [Source:MGI Symbol;Acc:MGI:1920779]	9	445	0.525843	0	0	2	0	0	0
ENSMUSG00000101702	1700072G22Rik	RIKEN cDNA 1700072G22 gene [Source:MGI Symbol;Acc:MGI:1920746]	1	548	0.432482	0	0	0	0	0	0
ENSMUSG00000107744	1700072O05Rik	RIKEN cDNA 1700072O05 gene [Source:MGI Symbol;Acc:MGI:1920755]	6	321	0.489097	0	0	0	0	0	0
ENSMUSG00000087204	1700073E17Rik	RIKEN cDNA 1700073E17 gene [Source:MGI Symbol;Acc:MGI:1920734]	6	1265	0.469565	0	0	0	0	0	0
ENSMUSG00000102231	1700074A21Rik	RIKEN cDNA 1700074A21 gene [Source:MGI Symbol;Acc:MGI:1920732]	1	346	0.393064	0	0	0	0	0	0
ENSMUSG00000099872	1700074H08Rik	RIKEN cDNA 1700074H08 gene [Source:MGI Symbol;Acc:MGI:1920730]	13	555	0.425225	0	0	0	0	0	0
ENSMUSG00000029883	1700074P13Rik	RIKEN cDNA 1700074P13 gene [Source:MGI Symbol;Acc:MGI:1920731]	6	1844	0.395336	0	0	0	0	0	0
ENSMUSG00000117741	1700080C20Rik	RIKEN cDNA 1700080C20 gene [Source:MGI Symbol;Acc:MGI:1925882]	17	186	0.462366	0	0	0	0	0	0
ENSMUSG00000084859	1700080N15Rik	RIKEN cDNA 1700080N15 gene [Source:MGI Symbol;Acc:MGI:1920739]	2	1465	0.430717	1	1	2	0	1	2
ENSMUSG00000105673	1700081B01Rik	RIKEN cDNA 1700081B01 gene [Source:MGI Symbol;Acc:MGI:1920750]	5	769	0.508453	0	0	0	0	0	0
ENSMUSG00000100573	1700081H04Rik	RIKEN cDNA 1700081H04 gene [Source:MGI Symbol;Acc:MGI:1920727]	5	1128	0.492021	0	0	0	0	0	0
ENSMUSG00000113209	1700081N11Rik	RIKEN cDNA 1700081N11 gene [Source:MGI Symbol;Acc:MGI:1920778]	12	688	0.545058	1	2	3	1	10	4
ENSMUSG00000023737	1700082M22Rik	RIKEN cDNA 1700082M22 gene [Source:MGI Symbol;Acc:MGI:1920784]	8	2210	0.403167	2	0	2	0	0	0
ENSMUSG00000100668	1700083H02Rik	RIKEN cDNA 1700083H02 gene [Source:MGI Symbol;Acc:MGI:1914598]	12	637	0.409733	0	0	0	0	0	0
ENSMUSG00000086016	1700084C06Rik	RIKEN cDNA 1700084C06 gene [Source:MGI Symbol;Acc:MGI:1923868]	9	750	0.537333	5	14	6	5	1	0
ENSMUSG00000114333	1700084D21Rik	RIKEN cDNA 1700084D21 gene [Source:MGI Symbol;Acc:MGI:1923970]	13	444	0.484234	0	0	0	0	0	0
ENSMUSG00000100747	1700084E18Rik	RIKEN cDNA 1700084E18 gene [Source:MGI Symbol;Acc:MGI:1914600]	2	1429	0.621414	9	2	5	6	1	4
ENSMUSG00000099639	1700084F23Rik	RIKEN cDNA 1700084F23 gene [Source:MGI Symbol;Acc:MGI:1921530]	13	2105	0.463183	0	0	0	0	0	0
ENSMUSG00000058101	1700084J12Rik	RIKEN cDNA 1700084J12 gene [Source:MGI Symbol;Acc:MGI:1920736]	15	1992	0.4749	0	0	0	0	0	0
ENSMUSG00000057805	1700084M14Rik	RIKEN cDNA 1700084M14 gene [Source:MGI Symbol;Acc:MGI:1920737]	X	559	0.429338	0	0	0	0	0	0
ENSMUSG00000100890	1700085C21Rik	RIKEN cDNA 1700085C21 gene [Source:MGI Symbol;Acc:MGI:1921533]	12	1082	0.48244	0	0	0	0	0	0
ENSMUSG00000115693	1700085D07Rik	RIKEN cDNA 1700085D07 gene [Source:MGI Symbol;Acc:MGI:1920741]	15	318	0.465409	0	0	0	0	0	0
ENSMUSG00000020548	1700086D15Rik	RIKEN cDNA 1700086D15 gene [Source:MGI Symbol;Acc:MGI:1921532]	11	1093	0.504117	16	15	5	3	7	0
ENSMUSG00000071265	1700086L19Rik	RIKEN cDNA 1700086L19 gene [Source:MGI Symbol;Acc:MGI:1921534]	12	1075	0.47814	5	1	0	0	3	0
ENSMUSG00000097080	1700086O06Rik	RIKEN cDNA 1700086O06 gene [Source:MGI Symbol;Acc:MGI:1920766]	18	2027	0.523434	11	12	16	9	10	17
ENSMUSG00000085085	1700086P04Rik	RIKEN cDNA 1700086P04 gene [Source:MGI Symbol;Acc:MGI:1914599]	4	1009	0.46779	1	0	0	0	2	0
ENSMUSG00000115099	1700087I21Rik	RIKEN cDNA 1700087I21 gene [Source:MGI Symbol;Acc:MGI:1923869]	14	4145	0.454282	62	29	32	35	47	59
ENSMUSG00000115723	1700087M22Rik	RIKEN cDNA 1700087M22 gene [Source:MGI Symbol;Acc:MGI:1925717]	14	208	0.418269	0	0	0	0	0	0
ENSMUSG00000033029	1700088E04Rik	RIKEN cDNA 1700088E04 gene [Source:MGI Symbol;Acc:MGI:1920774]	15	5292	0.550454	22	54	37	22	43	25
ENSMUSG00000090462	1700091H14Rik	RIKEN cDNA 1700091H14 gene [Source:MGI Symbol;Acc:MGI:1920803]	14	1391	0.435658	0	0	0	0	0	0
ENSMUSG00000086781	1700092C02Rik	RIKEN cDNA 1700092C02 gene [Source:MGI Symbol;Acc:MGI:1914607]	8	359	0.431755	0	0	0	0	0	0
ENSMUSG00000092499	1700092C10Rik	RIKEN cDNA 1700092C10 gene [Source:MGI Symbol;Acc:MGI:1920804]	14	585	0.505983	0	0	0	0	0	0
ENSMUSG00000085353	1700092C17Rik	RIKEN cDNA 1700092C17 gene [Source:MGI Symbol;Acc:MGI:1921545]	2	424	0.471698	0	0	0	0	0	0
ENSMUSG00000111487	1700092E16Rik	RIKEN cDNA 1700092E16 gene [Source:MGI Symbol;Acc:MGI:1921541]	10	753	0.480744	0	0	0	0	0	0
ENSMUSG00000084811	1700092E19Rik	RIKEN cDNA 1700092E19 gene [Source:MGI Symbol;Acc:MGI:1920826]	13	2006	0.454138	0	0	0	0	0	0
ENSMUSG00000078600	1700092K14Rik	RIKEN cDNA 1700092K14 gene [Source:MGI Symbol;Acc:MGI:1920786]	11	395	0.506329	0	0	0	0	0	0
[truncated: 53,417 more rows]

## Sheet: All Present Genes
gene_id	SYMBOL	DESCRIPTION	SEQNAME	Fold_Change	PValue	FDR	WT_0H_Avg_FPKM	E1_0H_Avg_FPKM
ENSMUSG00000112825	Gm9118	predicted gene 9118 [Source:MGI Symbol;Acc:MGI:3648185]	10	1058.9	7.47244e-29	1.07401e-24	0	16.4451
ENSMUSG00000048126	Col6a3	collagen, type VI, alpha 3 [Source:MGI Symbol;Acc:MGI:88461]	1	-8.92984	2.21887e-19	1.59459e-15	53.8841	6.03152
ENSMUSG00000032649	Colgalt2	collagen beta(1-O)galactosyltransferase 2 [Source:MGI Symbol;Acc:MGI:2138232]	1	2.69181	1.33649e-17	6.40311e-14	11.9937	32.27
ENSMUSG00000053113	Socs3	suppressor of cytokine signaling 3 [Source:MGI Symbol;Acc:MGI:1201791]	11	-2.93909	6.76068e-13	1.96506e-09	26.9086	9.14803
ENSMUSG00000024843	Chka	choline kinase alpha [Source:MGI Symbol;Acc:MGI:107760]	19	-2.10606	6.83593e-13	1.96506e-09	9.00639	4.27719
ENSMUSG00000031762	Mt2	metallothionein 2 [Source:MGI Symbol;Acc:MGI:97172]	8	-3.09791	2.41074e-12	5.77493e-09	51.7909	16.7185
ENSMUSG00000052688	Rab7b	RAB7B, member RAS oncogene family [Source:MGI Symbol;Acc:MGI:2442295]	1	-10.2907	9.75135e-12	2.00223e-08	2.02395	0.192448
ENSMUSG00000005148	Klf5	Kruppel-like factor 5 [Source:MGI Symbol;Acc:MGI:1338056]	14	-7.34319	1.63239e-10	2.9328e-07	1.78881	0.242491
ENSMUSG00000105703	Gm43305	predicted gene 43305 [Source:MGI Symbol;Acc:MGI:5663442]	14	16.0833	3.02743e-10	4.83481e-07	0.0734867	1.2269
ENSMUSG00000031538	Plat	plasminogen activator, tissue [Source:MGI Symbol;Acc:MGI:97610]	8	-2.73835	8.69162e-10	1.24925e-06	8.01864	2.92888
ENSMUSG00000020912	Krt12	keratin 12 [Source:MGI Symbol;Acc:MGI:96687]	11	-15.6616	1.84408e-09	2.40954e-06	3.73149	0.227477
ENSMUSG00000015568	Lpl	lipoprotein lipase [Source:MGI Symbol;Acc:MGI:96820]	8	1.93722	8.9535e-09	1.0724e-05	3.69787	7.16694
ENSMUSG00000034765	Dusp5	dual specificity phosphatase 5 [Source:MGI Symbol;Acc:MGI:2685183]	19	-3.5199	1.0847e-08	1.19926e-05	21.5735	6.12541
ENSMUSG00000026482	Rgl1	ral guanine nucleotide dissociation stimulator,-like 1 [Source:MGI Symbol;Acc:MGI:107484]	1	-2.16603	4.62823e-08	4.75154e-05	8.7142	4.03032
ENSMUSG00000048949	Gm6206	predicted pseudogene 6206 [Source:MGI Symbol;Acc:MGI:3644890]	X	5.21019	5.73233e-08	5.49272e-05	0.679454	3.55739
ENSMUSG00000022602	Arc	activity regulated cytoskeletal-associated protein [Source:MGI Symbol;Acc:MGI:88067]	15	-3.50481	7.70115e-08	6.91804e-05	5.53262	1.57894
ENSMUSG00000023087	Noct	nocturnin [Source:MGI Symbol;Acc:MGI:109382]	3	-2.16023	8.93604e-08	7.55516e-05	4.03206	1.8616
ENSMUSG00000022952	Runx1	runt related transcription factor 1 [Source:MGI Symbol;Acc:MGI:99852]	16	-2.92819	1.99001e-07	0.000158902	2.00163	0.680685
ENSMUSG00000032802	Srxn1	sulfiredoxin 1 homolog (S. cerevisiae) [Source:MGI Symbol;Acc:MGI:104971]	2	-2.08425	6.37116e-07	0.000481962	15.5496	7.4648
ENSMUSG00000023206	Il15ra	interleukin 15 receptor, alpha chain [Source:MGI Symbol;Acc:MGI:104644]	2	-17.8665	1.82978e-06	0.00131497	0.562598	0.0315174
ENSMUSG00000076609	Igkc	immunoglobulin kappa constant [Source:MGI Symbol;Acc:MGI:96495]	6	2.58513	2.35437e-06	0.00160024	18.8826	48.7893
ENSMUSG00000044471	Lncpint	long non-protein coding RNA, Trp53 induced transcript [Source:MGI Symbol;Acc:MGI:2673128]	6	-2.22048	2.44941e-06	0.00160024	6.65148	3.00056
ENSMUSG00000095041			JH584304.1	-1.84231	2.7651e-06	0.00172794	34.6276	18.7995
ENSMUSG00000039384	Dusp10	dual specificity phosphatase 10 [Source:MGI Symbol;Acc:MGI:1927070]	1	-3.23808	2.98123e-06	0.00178538	4.45734	1.36877
ENSMUSG00000002289	Angptl4	angiopoietin-like 4 [Source:MGI Symbol;Acc:MGI:1888999]	17	-3.56681	3.644e-06	0.00209501	3.56465	0.991491
ENSMUSG00000027859	Ngf	nerve growth factor [Source:MGI Symbol;Acc:MGI:97321]	3	-6.5848	3.85606e-06	0.00213166	2.96539	0.439658
ENSMUSG00000024912	Fosl1	fos-like antigen 1 [Source:MGI Symbol;Acc:MGI:107179]	19	-2.40062	8.01111e-06	0.00418802	15.8714	6.61697
ENSMUSG00000041889	Shisa4	shisa family member 4 [Source:MGI Symbol;Acc:MGI:1924802]	1	-1.86262	8.15868e-06	0.00418802	37.5255	20.1756
ENSMUSG00000032845	Alpk2	alpha-kinase 2 [Source:MGI Symbol;Acc:MGI:2449492]	18	-9.92287	8.86343e-06	0.0043929	0.285363	0.0273231
ENSMUSG00000021458	Aopep	aminopeptidase O [Source:MGI Symbol;Acc:MGI:1919311]	13	-2.15474	9.29655e-06	0.00445398	3.05773	1.42194
ENSMUSG00000112307	Gm48751	predicted gene, 48751 [Source:MGI Symbol;Acc:MGI:6098427]	10	-5.18185	1.06901e-05	0.0049564	2.53234	0.487769
ENSMUSG00000036902	Neto2	neuropilin (NRP) and tolloid (TLL)-like 2 [Source:MGI Symbol;Acc:MGI:1921763]	8	2.7662	1.1162e-05	0.00501347	1.60755	4.44261
ENSMUSG00000016995	Matn4	matrilin 4 [Source:MGI Symbol;Acc:MGI:1328314]	2	-8.63345	1.38456e-05	0.00603038	0.650037	0.0740756
ENSMUSG00000024462	Gabbr1	gamma-aminobutyric acid (GABA) B receptor, 1 [Source:MGI Symbol;Acc:MGI:1860139]	17	-1.96815	2.0801e-05	0.00879333	5.47859	2.78195
ENSMUSG00000087445	Gm14286	predicted gene 14286 [Source:MGI Symbol;Acc:MGI:3650190]	2	-6.79428	2.15309e-05	0.00884183	6.62519	0.966986
ENSMUSG00000032525	Nktr	natural killer tumor recognition sequence [Source:MGI Symbol;Acc:MGI:97346]	9	-1.5402	2.25003e-05	0.00898324	9.02783	5.86115
ENSMUSG00000039994	Timeless	timeless circadian clock 1 [Source:MGI Symbol;Acc:MGI:1321393]	10	-1.92214	2.47267e-05	0.00960531	11.3305	5.90053
ENSMUSG00000024287	Thoc1	THO complex 1 [Source:MGI Symbol;Acc:MGI:1919668]	18	-1.89996	2.61298e-05	0.00988326	3.6301	1.91225
ENSMUSG00000022146	Osmr	oncostatin M receptor [Source:MGI Symbol;Acc:MGI:1330819]	15	-2.00077	2.86689e-05	0.0105656	2.43484	1.21688
ENSMUSG00000000567	Sox9	SRY (sex determining region Y)-box 9 [Source:MGI Symbol;Acc:MGI:98371]	11	-1.67209	2.94787e-05	0.0105924	47.4949	28.3946
ENSMUSG00000037242	Clic4	chloride intracellular channel 4 (mitochondrial) [Source:MGI Symbol;Acc:MGI:1352754]	4	2.30308	3.32887e-05	0.0116697	2.58803	5.95922
ENSMUSG00000061878	Sphk1	sphingosine kinase 1 [Source:MGI Symbol;Acc:MGI:1316649]	11	-6.27002	3.64138e-05	0.0123651	0.840804	0.132571
ENSMUSG00000026185	Igfbp5	insulin-like growth factor binding protein 5 [Source:MGI Symbol;Acc:MGI:96440]	1	3.42373	3.6993e-05	0.0123651	20.6909	70.8392
ENSMUSG00000114433	Gm48488	predicted gene, 48488 [Source:MGI Symbol;Acc:MGI:6098010]	13	-6.80175	4.03243e-05	0.0131723	0.579404	0.0846886
ENSMUSG00000047330	Kcne4	potassium voltage-gated channel, Isk-related subfamily, gene 4 [Source:MGI Symbol;Acc:MGI:1891125]	1	2.22349	4.50299e-05	0.0143826	5.58045	12.4046
ENSMUSG00000097993	Ptprv	protein tyrosine phosphatase, receptor type, V [Source:MGI Symbol;Acc:MGI:108027]	1	12.1398	4.75197e-05	0.0148478	0.0226981	0.291354
ENSMUSG00000102874	Gm37137	predicted gene, 37137 [Source:MGI Symbol;Acc:MGI:5610365]	9	-10.8107	5.1384e-05	0.0157009	0.54366	0.0456223
ENSMUSG00000021733	Slc4a7	solute carrier family 4, sodium bicarbonate cotransporter, member 7 [Source:MGI Symbol;Acc:MGI:2443878]	14	-1.64756	5.24345e-05	0.0157009	4.12939	2.50425
ENSMUSG00000031312	Itgb1bp2	integrin beta 1 binding protein 2 [Source:MGI Symbol;Acc:MGI:1353420]	X	-7.8608	5.38227e-05	0.0157876	1.28068	0.158002
ENSMUSG00000082431	Prdx2-ps1	peroxiredoxin 2, pseudogene 1 [Source:MGI Symbol;Acc:MGI:1321403]	1	10.1327	6.81989e-05	0.0193544	0.25948	2.8012
ENSMUSG00000026305	Lrrfip1	leucine rich repeat (in FLII) interacting protein 1 [Source:MGI Symbol;Acc:MGI:1342770]	1	-1.54384	6.86757e-05	0.0193544	13.3809	8.67223
ENSMUSG00000037946	Fgd3	FYVE, RhoGEF and PH domain containing 3 [Source:MGI Symbol;Acc:MGI:1353657]	13	-3.37965	7.12301e-05	0.0196757	1.53331	0.453678
ENSMUSG00000102349	Gm37376	predicted gene, 37376 [Source:MGI Symbol;Acc:MGI:5610604]	19	-2.81247	7.25537e-05	0.0196757	32.0973	11.394
ENSMUSG00000106121	Gm42679	predicted gene 42679 [Source:MGI Symbol;Acc:MGI:5662816]	3	-9.30375	7.58501e-05	0.0201888	1.06882	0.115
ENSMUSG00000083827	Gm15712	predicted gene 15712 [Source:MGI Symbol;Acc:MGI:3783154]	16	-10.709	8.2854e-05	0.021486	1.24146	0.101723
ENSMUSG00000037266	Rsrp1	arginine/serine rich protein 1 [Source:MGI Symbol;Acc:MGI:106498]	4	-1.59988	8.37137e-05	0.021486	29.6838	18.5616
ENSMUSG00000056128	Gm9991	predicted gene 9991 [Source:MGI Symbol;Acc:MGI:3643217]	1	-2.88094	8.67673e-05	0.0215657	11.13	3.87007
ENSMUSG00000087115	Pcsk2os2	proprotein convertase subtilisin/kexin type 2, opposite strand 2 [Source:MGI Symbol;Acc:MGI:3649365]	2	-3.1869	8.70251e-05	0.0215657	3.44033	1.08375
ENSMUSG00000080316	Spaca6	sperm acrosome associated 6 [Source:MGI Symbol;Acc:MGI:1922452]	17	-2.23245	9.1242e-05	0.0222275	8.8972	3.98791
ENSMUSG00000078651	Aoc2	amine oxidase, copper containing 2 (retina-specific) [Source:MGI Symbol;Acc:MGI:2668431]	11	-3.85972	9.72417e-05	0.0232943	1.98975	0.509334
ENSMUSG00000031284	Pak3	p21 (RAC1) activated kinase 3 [Source:MGI Symbol;Acc:MGI:1339656]	X	2.0692	0.00010104	0.0237309	2.47213	5.11076
ENSMUSG00000056708	Ier5	immediate early response 5 [Source:MGI Symbol;Acc:MGI:1337072]	1	-2.21192	0.000102367	0.0237309	5.95292	2.692
ENSMUSG00000026034	Clk1	CDC-like kinase 1 [Source:MGI Symbol;Acc:MGI:107403]	1	-1.62008	0.00010964	0.0248688	9.72708	6.00249
ENSMUSG00000009741	Ubp1	upstream binding protein 1 [Source:MGI Symbol;Acc:MGI:104889]	9	-1.67675	0.000110736	0.0248688	11.8677	7.08035
ENSMUSG00000045813	Gm9801	predicted gene 9801 [Source:MGI Symbol;Acc:MGI:3647139]	7	-2.76333	0.000133057	0.0293487	3.44127	1.24948
ENSMUSG00000028063	Lmna	lamin A [Source:MGI Symbol;Acc:MGI:96794]	3	-1.47107	0.000134768	0.0293487	26.5682	18.0645
ENSMUSG00000059866	Tnip2	TNFAIP3 interacting protein 2 [Source:MGI Symbol;Acc:MGI:2386643]	5	-2.03229	0.000138067	0.0296185	7.09306	3.49529
ENSMUSG00000019433	Gipc1	GIPC PDZ domain containing family, member 1 [Source:MGI Symbol;Acc:MGI:1926252]	8	1.62944	0.000156469	0.0330724	30.4651	49.6238
ENSMUSG00000103313	Gm38357	predicted gene, 38357 [Source:MGI Symbol;Acc:MGI:5611585]	3	-3.13737	0.000170267	0.0354673	2.54838	0.813604
ENSMUSG00000096010	H4f16	H4 histone 16 [Source:MGI Symbol;Acc:MGI:2448443]	6	2.45291	0.000187933	0.0385879	1.64896	4.05233
ENSMUSG00000047909	Ankrd16	ankyrin repeat domain 16 [Source:MGI Symbol;Acc:MGI:2444796]	2	-2.20865	0.000194449	0.0393636	3.45368	1.56644
ENSMUSG00000032621	Srek1	splicing regulatory glutamine/lysine-rich protein 1 [Source:MGI Symbol;Acc:MGI:2145245]	13	-1.49367	0.00020143	0.0398098	10.3764	6.94213
ENSMUSG00000036879	Phkb	phosphorylase kinase beta [Source:MGI Symbol;Acc:MGI:97578]	8	1.52943	0.000202192	0.0398098	9.35414	14.3011
ENSMUSG00000020183	Cpm	carboxypeptidase M [Source:MGI Symbol;Acc:MGI:1917824]	10	-2.94995	0.000229856	0.0446449	2.07305	0.701558
ENSMUSG00000021508	Cxcl14	chemokine (C-X-C motif) ligand 14 [Source:MGI Symbol;Acc:MGI:1888514]	13	1.47844	0.000237439	0.0451086	28.8784	42.7104
ENSMUSG00000035545	Leng8	leukocyte receptor cluster (LRC) member 8 [Source:MGI Symbol;Acc:MGI:2142195]	7	-1.8403	0.00023852	0.0451086	20.0521	10.899
ENSMUSG00000035673	Sbno2	strawberry notch 2 [Source:MGI Symbol;Acc:MGI:2448490]	10	-2.1112	0.000242459	0.0452579	7.90119	3.74419
ENSMUSG00000031765	Mt1	metallothionein 1 [Source:MGI Symbol;Acc:MGI:97171]	8	-2.00089	0.000262398	0.0483518	30.3409	15.152
ENSMUSG00000028931	Kcnab2	potassium voltage-gated channel, shaker-related subfamily, beta member 2 [Source:MGI Symbol;Acc:MGI:109239]	4	-2.29669	0.000303515	0.054455	3.46139	1.50081
ENSMUSG00000031584	Gsr	glutathione reductase [Source:MGI Symbol;Acc:MGI:95804]	8	-1.75587	0.000307361	0.054455	10.04	5.72233
ENSMUSG00000086385	Gm12701	predicted gene 12701 [Source:MGI Symbol;Acc:MGI:3650875]	4	-4.45019	0.000309661	0.054455	8.23824	1.8293
ENSMUSG00000110068	Gm45294	predicted gene 45294 [Source:MGI Symbol;Acc:MGI:5791130]	8	-5.93365	0.000310673	0.054455	1.24568	0.201897
ENSMUSG00000083306	Gm13868	predicted gene 13868 [Source:MGI Symbol;Acc:MGI:3651789]	2	-5.20097	0.000336689	0.058304	11.2084	2.12309
ENSMUSG00000068115	Ninl	ninein-like [Source:MGI Symbol;Acc:MGI:1925427]	2	-1.96103	0.000353711	0.0605225	4.16015	2.11651
ENSMUSG00000020255	D10Wsu102e	DNA segment, Chr 10, Wayne State University 102, expressed [Source:MGI Symbol;Acc:MGI:106381]	10	-1.84003	0.000360016	0.0608765	0.666415	0.362174
ENSMUSG00000103094	Gm37558	predicted gene, 37558 [Source:MGI Symbol;Acc:MGI:5610786]	3	-2.9989	0.000401967	0.0660846	2.38808	0.785283
ENSMUSG00000102157	Gm37470	predicted gene, 37470 [Source:MGI Symbol;Acc:MGI:5610698]	1	-5.4726	0.000412073	0.0660846	0.867368	0.153412
ENSMUSG00000037962	Rflna	refilin A [Source:MGI Symbol;Acc:MGI:1920371]	5	2.38967	0.000414695	0.0660846	3.22453	7.69617
ENSMUSG00000032332	Col12a1	collagen, type XII, alpha 1 [Source:MGI Symbol;Acc:MGI:88448]	9	-3.10586	0.000414979	0.0660846	1.66095	0.532491
ENSMUSG00000087231	E230016M11Rik	RIKEN cDNA E230016M11 gene [Source:MGI Symbol;Acc:MGI:2443524]	6	-2.24014	0.000415757	0.0660846	3.42927	1.52816
ENSMUSG00000108741	Gm44553	predicted gene 44553 [Source:MGI Symbol;Acc:MGI:5753129]	7	-3.99092	0.000418402	0.0660846	1.87731	0.459861
ENSMUSG00000029068	Ccnl2	cyclin L2 [Source:MGI Symbol;Acc:MGI:1927119]	4	-1.63386	0.000429734	0.0664436	9.58281	5.86562
ENSMUSG00000101268	2010310C07Rik	RIKEN cDNA 2010310C07 gene [Source:MGI Symbol;Acc:MGI:1919381]	6	-8.79986	0.00043137	0.0664436	1.50867	0.174012
ENSMUSG00000010660	Plcd1	phospholipase C, delta 1 [Source:MGI Symbol;Acc:MGI:97614]	9	-3.00639	0.000434544	0.0664436	1.95514	0.644012
ENSMUSG00000040459	Arglu1	arginine and glutamate rich 1 [Source:MGI Symbol;Acc:MGI:2442985]	8	-1.42917	0.000439237	0.0664542	20.054	14.0323
ENSMUSG00000103722	2700078F05Rik	RIKEN cDNA 2700078F05 gene [Source:MGI Symbol;Acc:MGI:1919876]	1	-4.46474	0.000468257	0.0701068	1.07498	0.235884
ENSMUSG00000110710	C78859	expressed sequence C78859 [Source:MGI Symbol;Acc:MGI:2142856]	8	-5.78587	0.000476396	0.0705902	0.76139	0.128983
ENSMUSG00000028613	Lrp8	low density lipoprotein receptor-related protein 8, apolipoprotein e receptor [Source:MGI Symbol;Acc:MGI:1340044]	4	-1.85495	0.000502029	0.0736293	2.23929	1.20575
ENSMUSG00000029075	Tnfrsf4	tumor necrosis factor receptor superfamily, member 4 [Source:MGI Symbol;Acc:MGI:104512]	4	-4.34648	0.000518166	0.0752283	2.02536	0.460196
ENSMUSG00000006651	Aplp1	amyloid beta (A4) precursor-like protein 1 [Source:MGI Symbol;Acc:MGI:88046]	7	-1.62716	0.000534152	0.0755398	21.7127	13.3298
ENSMUSG00000038332	Sesn1	sestrin 1 [Source:MGI Symbol;Acc:MGI:2155278]	10	1.45898	0.000534785	0.0755398	16.1673	23.5821
ENSMUSG00000034839	Larp6	La ribonucleoprotein domain family, member 6 [Source:MGI Symbol;Acc:MGI:1914807]	9	-3.75299	0.000536078	0.0755398	1.51073	0.400389
ENSMUSG00000024388	Myo7b	myosin VIIB [Source:MGI Symbol;Acc:MGI:107709]	18	7.29691	0.000565597	0.0789256	0.0280894	0.216308
ENSMUSG00000041771	Slc24a4	solute carrier family 24 (sodium/potassium/calcium exchanger), member 4 [Source:MGI Symbol;Acc:MGI:2447362]	12	-1.80511	0.000612341	0.0838719	7.86881	4.36433
ENSMUSG00000051331	Cacna1c	calcium channel, voltage-dependent, L type, alpha 1C subunit [Source:MGI Symbol;Acc:MGI:103013]	6	-1.61452	0.000612715	0.0838719	1.50054	0.929606
ENSMUSG00000028803	Nipal3	NIPA-like domain containing 3 [Source:MGI Symbol;Acc:MGI:1921802]	4	1.47082	0.000634513	0.0845931	6.80142	10.0077
ENSMUSG00000048612	Myof	myoferlin [Source:MGI Symbol;Acc:MGI:1919192]	19	-1.5088	0.000635085	0.0845931	7.15152	4.74324
ENSMUSG00000071337	Tia1	cytotoxic granule-associated RNA binding protein 1 [Source:MGI Symbol;Acc:MGI:107914]	6	-1.59294	0.000640788	0.0845931	3.63643	2.28584
ENSMUSG00000024799	Tm7sf2	transmembrane 7 superfamily member 2 [Source:MGI Symbol;Acc:MGI:1920416]	19	-2.49527	0.000641526	0.0845931	1.92672	0.76906
ENSMUSG00000021360	Gcnt2	glucosaminyl (N-acetyl) transferase 2, I-branching enzyme [Source:MGI Symbol;Acc:MGI:1100870]	13	-2.68061	0.000658243	0.0859271	1.02186	0.383121
ENSMUSG00000068699	Flnc	filamin C, gamma [Source:MGI Symbol;Acc:MGI:95557]	6	-2.70694	0.000664794	0.0859271	16.6237	6.13999
ENSMUSG00000024097	Srsf7	serine and arginine-rich splicing factor 7 [Source:MGI Symbol;Acc:MGI:1926232]	17	-1.55712	0.000669577	0.0859271	12.572	8.07109
ENSMUSG00000031530	Dusp4	dual specificity phosphatase 4 [Source:MGI Symbol;Acc:MGI:2442191]	8	-2.26096	0.000677169	0.0861323	5.95745	2.62509
ENSMUSG00000107947	Gm44438	predicted gene, 44438 [Source:MGI Symbol;Acc:MGI:5690830]	6	-2.92613	0.000694147	0.0872331	2.45142	0.839715
ENSMUSG00000042251	Pm20d1	peptidase M20 domain containing 1 [Source:MGI Symbol;Acc:MGI:2442939]	1	2.39539	0.000697962	0.0872331	0.599938	1.44002
ENSMUSG00000107512	Gm44433	predicted gene, 44433 [Source:MGI Symbol;Acc:MGI:5690825]	6	-4.39615	0.000716817	0.0888174	1.94317	0.439959
ENSMUSG00000024299	Adamts10	a disintegrin-like and metallopeptidase (reprolysin type) with thrombospondin type 1 motif, 10 [Source:MGI Symbol;Acc:MGI:2449112]	17	-1.76446	0.000734622	0.0902454	2.97035	1.68372
ENSMUSG00000085743	8430419K02Rik	RIKEN cDNA 8430419K02 gene [Source:MGI Symbol;Acc:MGI:1921768]	11	-4.35665	0.000793763	0.0957562	1.36836	0.307923
ENSMUSG00000039518	Cdsn	corneodesmosin [Source:MGI Symbol;Acc:MGI:3505689]	17	-3.14941	0.000797391	0.0957562	2.65281	0.838885
ENSMUSG00000110556	Gm45762	predicted gene 45762 [Source:MGI Symbol;Acc:MGI:5804877]	8	-5.61096	0.000807131	0.0957562	0.996256	0.179586
ENSMUSG00000004947	Dtx2	deltex 2, E3 ubiquitin ligase [Source:MGI Symbol;Acc:MGI:1921448]	5	-1.92065	0.000816484	0.0957562	2.49093	1.29298
ENSMUSG00000046341	Gm11223	predicted gene 11223 [Source:MGI Symbol;Acc:MGI:3651631]	4	2.26638	0.000817308	0.0957562	9.13377	20.7316
ENSMUSG00000040663	Clcf1	cardiotrophin-like cytokine factor 1 [Source:MGI Symbol;Acc:MGI:1930088]	19	-2.17086	0.000824009	0.0957562	3.2174	1.48274
ENSMUSG00000041642	Kif21b	kinesin family member 21B [Source:MGI Symbol;Acc:MGI:109234]	1	-1.58101	0.000826116	0.0957562	6.64863	4.20341
ENSMUSG00000074646	6430550D23Rik	RIKEN cDNA 6430550D23 gene [Source:MGI Symbol;Acc:MGI:2443361]	2	-5.47284	0.000840529	0.0966474	0.318861	0.0562969
ENSMUSG00000102642	A130048G24Rik	RIKEN cDNA A130048G24 gene [Source:MGI Symbol;Acc:MGI:2443520]	1	-4.01224	0.000863461	0.0978203	1.26753	0.308965
ENSMUSG00000102417	Gm36939	predicted gene, 36939 [Source:MGI Symbol;Acc:MGI:5610167]	16	-5.86129	0.000864342	0.0978203	8.05644	1.39058
ENSMUSG00000034160	Ogt	O-linked N-acetylglucosamine (GlcNAc) transferase (UDP-N-acetylglucosamine:polypeptide-N-acetylglucosaminyl transferase) [Source:MGI Symbol;Acc:MGI:1339639]	X	-1.43895	0.000875459	0.0983044	25.3266	17.6027
ENSMUSG00000092341	Malat1	metastasis associated lung adenocarcinoma transcript 1 (non-coding RNA) [Source:MGI Symbol;Acc:MGI:1919539]	19	-2.04599	0.00095779	0.106716	4111.11	2009.35
ENSMUSG00000105445	Gm42972	predicted gene 42972 [Source:MGI Symbol;Acc:MGI:5663109]	3	-2.27322	0.000985585	0.108968	3.84524	1.68922
ENSMUSG00000091387	Gcnt4	glucosaminyl (N-acetyl) transferase 4, core 2 (beta-1,6-N-acetylglucosaminyltransferase) [Source:MGI Symbol;Acc:MGI:2684919]	13	-3.35883	0.00102394	0.112344	1.00058	0.296677
ENSMUSG00000072946	Ptgr2	prostaglandin reductase 2 [Source:MGI Symbol;Acc:MGI:1916372]	12	1.55189	0.00107522	0.116763	4.37005	6.78839
ENSMUSG00000028793	Rnf19b	ring finger protein 19B [Source:MGI Symbol;Acc:MGI:1922484]	4	-1.44932	0.00108046	0.116763	22.7363	15.6841
ENSMUSG00000033192	Lpcat2	lysophosphatidylcholine acyltransferase 2 [Source:MGI Symbol;Acc:MGI:3606214]	8	-1.84976	0.00112028	0.119378	6.44815	3.49157
ENSMUSG00000105340	Gm42878	predicted gene 42878 [Source:MGI Symbol;Acc:MGI:5663015]	5	-4.33873	0.00112127	0.119378	0.662561	0.147231
ENSMUSG00000026307	Scly	selenocysteine lyase [Source:MGI Symbol;Acc:MGI:1355310]	1	-1.91326	0.00113214	0.119649	3.5026	1.83197
ENSMUSG00000104030	5330406M23Rik	RIKEN cDNA 5330406M23 gene [Source:MGI Symbol;Acc:MGI:1923921]	6	-2.40109	0.00115847	0.121538	4.24619	1.76043
ENSMUSG00000108214	Gm43982	predicted gene, 43982 [Source:MGI Symbol;Acc:MGI:5690374]	6	-2.71719	0.00117082	0.121943	5.11732	1.88084
ENSMUSG00000026749	Nek6	NIMA (never in mitosis gene a)-related expressed kinase 6 [Source:MGI Symbol;Acc:MGI:1891638]	2	-1.51085	0.00120212	0.123803	4.11257	2.71903
ENSMUSG00000110631	Gm42047	predicted gene, 42047 [Source:MGI Symbol;Acc:MGI:5624932]	8	-1.93878	0.0012059	0.123803	3.59052	1.8548
ENSMUSG00000016128	Stard13	StAR-related lipid transfer (START) domain containing 13 [Source:MGI Symbol;Acc:MGI:2385331]	5	-1.76767	0.0012397	0.12637	4.17434	2.36388
ENSMUSG00000026604	Ptpn14	protein tyrosine phosphatase, non-receptor type 14 [Source:MGI Symbol;Acc:MGI:102467]	1	1.49616	0.001302	0.131786	8.96648	13.4145
ENSMUSG00000105470	Gm42589	predicted gene 42589 [Source:MGI Symbol;Acc:MGI:5662726]	5	-4.37731	0.00132174	0.131899	1.91618	0.434229
ENSMUSG00000111212	5330432J10Rik	RIKEN cDNA 5330432J10 gene [Source:MGI Symbol;Acc:MGI:2443489]	9	-2.55269	0.00132481	0.131899	3.02829	1.18854
ENSMUSG00000033730	Egr3	early growth response 3 [Source:MGI Symbol;Acc:MGI:1306780]	14	-2.48518	0.00133065	0.131899	2.551	1.01937
ENSMUSG00000074796	Slc4a11	solute carrier family 4, sodium bicarbonate transporter-like, member 11 [Source:MGI Symbol;Acc:MGI:2138987]	2	-5.53537	0.00136063	0.133563	0.655657	0.115423
ENSMUSG00000104164	Gm38248	predicted gene, 38248 [Source:MGI Symbol;Acc:MGI:5611476]	1	-5.22546	0.00136601	0.133563	0.430469	0.0801889
ENSMUSG00000039639	Kcne1	potassium voltage-gated channel, Isk-related subfamily, member 1 [Source:MGI Symbol;Acc:MGI:96673]	16	3.99856	0.00140265	0.135876	0.283063	1.13774
ENSMUSG00000111077	Gm48743	predicted gene, 48743 [Source:MGI Symbol;Acc:MGI:6098412]	10	-3.53708	0.00140986	0.135876	2.54752	0.721862
ENSMUSG00000033880	Lgals3bp	lectin, galactoside-binding, soluble, 3 binding protein [Source:MGI Symbol;Acc:MGI:99554]	11	1.6977	0.00141803	0.135876	10.296	17.4713
ENSMUSG00000021495	Fam193b	family with sequence similarity 193, member B [Source:MGI Symbol;Acc:MGI:2385851]	13	-1.55645	0.00147189	0.140102	3.52462	2.26224
ENSMUSG00000026436	Elk4	ELK4, member of ETS oncogene family [Source:MGI Symbol;Acc:MGI:102853]	1	-1.44032	0.00149505	0.141371	10.2087	7.08557
ENSMUSG00000028986	Klhl7	kelch-like 7 [Source:MGI Symbol;Acc:MGI:1196453]	5	-1.61838	0.00155581	0.145426	7.66213	4.72599
ENSMUSG00000038370	Pcp4l1	Purkinje cell protein 4-like 1 [Source:MGI Symbol;Acc:MGI:1913675]	1	1.45752	0.00156388	0.145426	64.4872	94.0058
ENSMUSG00000061414	Cracr2a	calcium release activated channel regulator 2A [Source:MGI Symbol;Acc:MGI:2685919]	6	5.32537	0.00157552	0.145426	0.0392339	0.217188
ENSMUSG00000090386	Mir99ahg	Mir99a and Mirlet7c-1 host gene (non-protein coding) [Source:MGI Symbol;Acc:MGI:1919929]	16	-2.11587	0.00158527	0.145426	1.42449	0.673582
ENSMUSG00000113140	Gm48624	predicted gene, 48624 [Source:MGI Symbol;Acc:MGI:6098222]	13	-4.05697	0.00158853	0.145426	0.811103	0.193501
ENSMUSG00000045349	Sh2d5	SH2 domain containing 5 [Source:MGI Symbol;Acc:MGI:2446215]	4	-4.63324	0.00162934	0.147988	0.8604	0.187339
ENSMUSG00000024186	Rgs11	regulator of G-protein signaling 11 [Source:MGI Symbol;Acc:MGI:1354739]	17	-1.87329	0.00163711	0.147988	4.40627	2.35532
ENSMUSG00000119895	U1	U1 spliceosomal RNA [Source:RFAM;Acc:RF00003]	12	1.98962	0.0016771	0.149689	43.7449	86.9486
ENSMUSG00000105733	Gm42973	predicted gene 42973 [Source:MGI Symbol;Acc:MGI:5663110]	3	-2.12964	0.00168299	0.149689	6.77859	3.18502
ENSMUSG00000050931	Sgms2	sphingomyelin synthase 2 [Source:MGI Symbol;Acc:MGI:1921692]	3	-2.47695	0.00168717	0.149689	1.15092	0.463642
ENSMUSG00000034595	Ppp1r18	protein phosphatase 1, regulatory subunit 18 [Source:MGI Symbol;Acc:MGI:1923698]	17	-1.99337	0.00172225	0.1515	3.55262	1.78185
ENSMUSG00000107994	D830050J10Rik	RIKEN cDNA D830050J10 gene [Source:MGI Symbol;Acc:MGI:2444203]	6	3.41587	0.00172866	0.1515	0.585205	2.0067
ENSMUSG00000099773	Hmgb1-rs16	high mobility group box 1, related sequence 16 [Source:MGI Symbol;Acc:MGI:104765]	9	-4.66533	0.00174716	0.152194	3.82485	0.796152
ENSMUSG00000097042	Gm17491	predicted gene, 17491 [Source:MGI Symbol;Acc:MGI:4937125]	8	-2.46275	0.00176572	0.152884	4.37605	1.76614
ENSMUSG00000025324	Atp10a	ATPase, class V, type 10A [Source:MGI Symbol;Acc:MGI:1330809]	7	-4.56465	0.00178196	0.153292	0.354519	0.0739805
ENSMUSG00000031595	Pdgfrl	platelet-derived growth factor receptor-like [Source:MGI Symbol;Acc:MGI:1916047]	8	-3.46476	0.00179176	0.153292	1.96846	0.56763
ENSMUSG00000027829	Ccnl1	cyclin L1 [Source:MGI Symbol;Acc:MGI:1922664]	3	-1.45048	0.00195149	0.165969	9.0206	6.22211
ENSMUSG00000074657	Kif5a	kinesin family member 5A [Source:MGI Symbol;Acc:MGI:109564]	10	-1.80006	0.00207876	0.175753	3.49719	1.93621
ENSMUSG00000060260	Pwwp2b	PWWP domain containing 2B [Source:MGI Symbol;Acc:MGI:2142008]	7	2.01828	0.00212232	0.178006	0.923368	1.86343
ENSMUSG00000105572	Gm43300	predicted gene 43300 [Source:MGI Symbol;Acc:MGI:5663437]	3	-2.4344	0.00213017	0.178006	3.72944	1.52763
ENSMUSG00000016763	Scube1	signal peptide, CUB domain, EGF-like 1 [Source:MGI Symbol;Acc:MGI:1890616]	15	-1.79378	0.00217512	0.180711	1.763	0.983376
ENSMUSG00000022723	Crybg3	beta-gamma crystallin domain containing 3 [Source:MGI Symbol;Acc:MGI:2676311]	16	1.42593	0.0022075	0.182347	20.2111	28.8203
ENSMUSG00000107707	Gm44286	predicted gene, 44286 [Source:MGI Symbol;Acc:MGI:5690678]	6	-3.87964	0.00223692	0.183722	2.2006	0.557998
ENSMUSG00000104963	Gm42974	predicted gene 42974 [Source:MGI Symbol;Acc:MGI:5663111]	3	-2.59754	0.00228854	0.186893	3.65082	1.40345
ENSMUSG00000060671	Atp8b2	ATPase, class I, type 8B, member 2 [Source:MGI Symbol;Acc:MGI:1859660]	3	-1.61829	0.00239633	0.19459	3.06371	1.89314
ENSMUSG00000020019	Ntn4	netrin 4 [Source:MGI Symbol;Acc:MGI:1888978]	10	1.40141	0.00241729	0.195189	39.7557	55.7052
ENSMUSG00000034656	Cacna1a	calcium channel, voltage-dependent, P/Q type, alpha 1A subunit [Source:MGI Symbol;Acc:MGI:109482]	8	-1.90639	0.00243111	0.195209	5.04334	2.64941
ENSMUSG00000101609	Kcnq1ot1	KCNQ1 overlapping transcript 1 [Source:MGI Symbol;Acc:MGI:1926855]	7	-1.88506	0.00249823	0.198709	2.41339	1.28052
ENSMUSG00000040997	Abhd4	abhydrolase domain containing 4 [Source:MGI Symbol;Acc:MGI:1915938]	14	1.44883	0.00251898	0.198709	12.5278	18.1359
ENSMUSG00000071654	Uqcc3	ubiquinol-cytochrome c reductase complex assembly factor 3 [Source:MGI Symbol;Acc:MGI:2147553]	19	2.06563	0.00252197	0.198709	7.42793	15.3874
ENSMUSG00000086322	E130218I03Rik	RIKEN cDNA E130218I03 gene [Source:MGI Symbol;Acc:MGI:3528958]	4	1.38795	0.00254264	0.198709	58.719	81.4944
ENSMUSG00000029822	Osbpl3	oxysterol binding protein-like 3 [Source:MGI Symbol;Acc:MGI:1918970]	6	-1.55129	0.00254383	0.198709	4.75075	3.06143
ENSMUSG00000097375	6720427I07Rik	RIKEN cDNA 6720427I07 gene [Source:MGI Symbol;Acc:MGI:1924398]	13	-1.94464	0.00256775	0.199494	2.10091	1.07972
ENSMUSG00000039533	Mmd2	monocyte to macrophage differentiation-associated 2 [Source:MGI Symbol;Acc:MGI:1922354]	5	-4.72805	0.00258608	0.199837	0.380867	0.0795908
ENSMUSG00000045954	Cavin2	caveolae associated 2 [Source:MGI Symbol;Acc:MGI:99513]	1	1.37198	0.00260308	0.199883	23.8421	32.6934
ENSMUSG00000041417	Pik3r1	phosphoinositide-3-kinase regulatory subunit 1 [Source:MGI Symbol;Acc:MGI:97583]	13	1.34491	0.00261449	0.199883	17.2575	23.2138
ENSMUSG00000037868	Egr2	early growth response 2 [Source:MGI Symbol;Acc:MGI:95296]	10	-3.09061	0.00265012	0.201535	1.00565	0.323802
ENSMUSG00000026596	Abl2	v-abl Abelson murine leukemia viral oncogene 2 (arg, Abelson-related gene) [Source:MGI Symbol;Acc:MGI:87860]	1	-1.38281	0.00268047	0.202771	7.77487	5.626
ENSMUSG00000068748	Ptprz1	protein tyrosine phosphatase, receptor type Z, polypeptide 1 [Source:MGI Symbol;Acc:MGI:97816]	6	-3.37462	0.00270033	0.203203	0.276574	0.0803447
ENSMUSG00000010097	Nxf1	nuclear RNA export factor 1 [Source:MGI Symbol;Acc:MGI:1858330]	19	-1.3981	0.00275899	0.205983	16.5328	11.8232
ENSMUSG00000113917	Gm48382	predicted gene, 48382 [Source:MGI Symbol;Acc:MGI:6097861]	12	-5.68216	0.00276593	0.205983	0.459495	0.0795114
ENSMUSG00000042279	H1f8	H1.8 linker histone [Source:MGI Symbol;Acc:MGI:2176207]	6	-3.73954	0.00279263	0.206899	2.31045	0.619089
ENSMUSG00000061589	Dot1l	DOT1-like, histone H3 methyltransferase (S. cerevisiae) [Source:MGI Symbol;Acc:MGI:2143886]	10	-1.49584	0.00281275	0.207321	6.69339	4.47198
ENSMUSG00000054408	Spcs3	signal peptidase complex subunit 3 homolog (S. cerevisiae) [Source:MGI Symbol;Acc:MGI:1923937]	8	-1.57512	0.00285457	0.207834	13.4315	8.53061
ENSMUSG00000024663	Rab3il1	RAB3A interacting protein (rabin3)-like 1 [Source:MGI Symbol;Acc:MGI:1922010]	19	1.72762	0.00285652	0.207834	3.5262	6.08832
ENSMUSG00000089706	B230216N24Rik	RIKEN cDNA B230216N24 gene [Source:MGI Symbol;Acc:MGI:1925853]	1	-2.99644	0.00286309	0.207834	0.682916	0.227635
ENSMUSG00000109390	Gm45718	predicted gene 45718 [Source:MGI Symbol;Acc:MGI:5804833]	7	-4.16	0.00291119	0.209553	1.0796	0.257619
ENSMUSG00000058979	Hdhd5	haloacid dehalogenase like hydrolase domain containing 5 [Source:MGI Symbol;Acc:MGI:2136976]	6	-2.26316	0.00291592	0.209553	1.89455	0.837998
ENSMUSG00000113015	Gm6296	predicted gene 6296 [Source:MGI Symbol;Acc:MGI:3648150]	13	-6.23104	0.00297648	0.211819	1.76494	0.281735
ENSMUSG00000021215	Net1	neuroepithelial cell transforming gene 1 [Source:MGI Symbol;Acc:MGI:1927138]	13	-1.53617	0.00297693	0.211819	9.95109	6.47489
ENSMUSG00000105071	Gm43336	predicted gene 43336 [Source:MGI Symbol;Acc:MGI:5663473]	5	-3.91888	0.00308767	0.218616	0.460655	0.113754
ENSMUSG00000034040	Galnt17	polypeptide N-acetylgalactosaminyltransferase 17 [Source:MGI Symbol;Acc:MGI:2137594]	5	-3.95887	0.00315651	0.222143	0.400438	0.0988961
ENSMUSG00000072969	Armcx5	armadillo repeat containing, X-linked 5 [Source:MGI Symbol;Acc:MGI:2148026]	X	-1.86468	0.00319326	0.222143	3.46297	1.85671
ENSMUSG00000023169	Slc38a1	solute carrier family 38, member 1 [Source:MGI Symbol;Acc:MGI:2145895]	15	-1.53878	0.00319713	0.222143	4.51029	2.93058
ENSMUSG00000025402	Nab2	Ngfi-A binding protein 2 [Source:MGI Symbol;Acc:MGI:107563]	10	-1.80001	0.00322034	0.222143	6.05198	3.35356
ENSMUSG00000024803	Ankrd1	ankyrin repeat domain 1 (cardiac muscle) [Source:MGI Symbol;Acc:MGI:1097717]	19	-2.83239	0.00322095	0.222143	1.56791	0.549439
ENSMUSG00000037885	Stk35	serine/threonine kinase 35 [Source:MGI Symbol;Acc:MGI:1914583]	2	1.34425	0.00323022	0.222143	59.0684	79.4028
ENSMUSG00000025582	Nptx1	neuronal pentraxin 1 [Source:MGI Symbol;Acc:MGI:107811]	11	-2.72939	0.00325272	0.222626	1.04474	0.384689
ENSMUSG00000035597	Prpf39	pre-mRNA processing factor 39 [Source:MGI Symbol;Acc:MGI:104602]	12	-1.53662	0.00330593	0.225195	4.58747	2.9846
ENSMUSG00000009418	Nav1	neuron navigator 1 [Source:MGI Symbol;Acc:MGI:2183683]	1	-1.41003	0.00332578	0.225479	7.45712	5.28442
ENSMUSG00000097998	Gm27019	predicted gene, 27019 [Source:MGI Symbol;Acc:MGI:5504134]	6	-4.2132	0.00334449	0.225612	3.70037	0.86114
ENSMUSG00000056091	St3gal5	ST3 beta-galactoside alpha-2,3-sialyltransferase 5 [Source:MGI Symbol;Acc:MGI:1339963]	6	1.37184	0.00335914	0.225612	33.8545	46.425
ENSMUSG00000035021	Baz1a	bromodomain adjacent to zinc finger domain 1A [Source:MGI Symbol;Acc:MGI:1309478]	12	-1.96992	0.00341169	0.228076	1.85793	0.945364
ENSMUSG00000113106	Gm47139	predicted gene, 47139 [Source:MGI Symbol;Acc:MGI:6095898]	12	-4.65809	0.0034427	0.22808	0.980999	0.209759
ENSMUSG00000034163	Zfc3h1	zinc finger, C3H1-type containing [Source:MGI Symbol;Acc:MGI:2446143]	10	-1.381	0.00344349	0.22808	11.2796	8.16826
ENSMUSG00000020863	Luc7l3	LUC7-like 3 (S. cerevisiae) [Source:MGI Symbol;Acc:MGI:1914934]	11	-1.37241	0.00347853	0.228225	19.1762	13.9702
ENSMUSG00000039990	Edrf1	erythroid differentiation regulatory factor 1 [Source:MGI Symbol;Acc:MGI:1919831]	7	-1.66685	0.00348133	0.228225	4.28873	2.56728
ENSMUSG00000032558	Nphp3	nephronophthisis 3 (adolescent) [Source:MGI Symbol;Acc:MGI:1921275]	9	-2.02435	0.00350406	0.228225	2.20103	1.09034
ENSMUSG00000031822	Gse1	genetic suppressor element 1, coiled-coil protein [Source:MGI Symbol;Acc:MGI:1098275]	8	-1.35289	0.00352623	0.228225	12.6877	9.38068
ENSMUSG00000107116	Gm43274	predicted gene 43274 [Source:MGI Symbol;Acc:MGI:5663411]	5	-3.49148	0.00353216	0.228225	0.983727	0.283881
ENSMUSG00000112756	Gm48014	predicted gene, 48014 [Source:MGI Symbol;Acc:MGI:6097321]	12	-2.49242	0.00355826	0.228225	4.83505	1.94606
ENSMUSG00000085419	Gm11734	predicted gene 11734 [Source:MGI Symbol;Acc:MGI:3652086]	11	-3.80502	0.00356714	0.228225	3.10614	0.795473
ENSMUSG00000019982	Myb	myeloblastosis oncogene [Source:MGI Symbol;Acc:MGI:97249]	10	2.37402	0.00357272	0.228225	0.664876	1.5759
ENSMUSG00000050357	Carmil2	capping protein regulator and myosin 1 linker 2 [Source:MGI Symbol;Acc:MGI:2685431]	8	-4.66972	0.00361274	0.22976	0.416815	0.0889424
ENSMUSG00000118155	Gm50136	predicted gene, 50136 [Source:MGI Symbol;Acc:MGI:6302882]	19	-4.53755	0.00362923	0.229792	1.9011	0.424473
ENSMUSG00000021701	Plk2	polo like kinase 2 [Source:MGI Symbol;Acc:MGI:1099790]	13	-1.68208	0.00373695	0.23547	6.38663	3.79801
ENSMUSG00000047446	Arl4a	ADP-ribosylation factor-like 4A [Source:MGI Symbol;Acc:MGI:99437]	12	-1.35657	0.00375166	0.23547	10.1575	7.48932
ENSMUSG00000038729	Pakap	paralemmin A kinase anchor protein [Source:MGI Symbol;Acc:MGI:5141924]	4	-3.25167	0.00377093	0.23565	0.608714	0.187062
ENSMUSG00000045328	Cenpe	centromere protein E [Source:MGI Symbol;Acc:MGI:1098230]	3	2.10118	0.00385972	0.239295	0.492923	1.03745
ENSMUSG00000054720	Lrrc8c	leucine rich repeat containing 8 family, member C [Source:MGI Symbol;Acc:MGI:2140839]	5	-3.74969	0.00386255	0.239295	0.372668	0.0982986
ENSMUSG00000017639	Rab11fip4	RAB11 family interacting protein 4 (class II) [Source:MGI Symbol;Acc:MGI:2442920]	11	1.42557	0.00388582	0.239703	5.6032	7.98492
ENSMUSG00000032487	Ptgs2	prostaglandin-endoperoxide synthase 2 [Source:MGI Symbol;Acc:MGI:97798]	1	2.6422	0.00392142	0.240429	0.645611	1.70589
ENSMUSG00000104724	Gm43162	predicted gene 43162 [Source:MGI Symbol;Acc:MGI:5663299]	3	-4.10972	0.00393481	0.240429	1.27406	0.308442
ENSMUSG00000055065	Ddx17	DEAD box helicase 17 [Source:MGI Symbol;Acc:MGI:1914290]	15	-1.3307	0.00396173	0.240429	39.2401	29.4861
ENSMUSG00000043668	Tox3	TOX high mobility group box family member 3 [Source:MGI Symbol;Acc:MGI:3039593]	8	1.37538	0.00396449	0.240429	18.6414	25.6247
ENSMUSG00000028134	Ptbp2	polypyrimidine tract binding protein 2 [Source:MGI Symbol;Acc:MGI:1860489]	3	-1.50847	0.00401618	0.24254	5.71772	3.79245
ENSMUSG00000064215	Ifi27	interferon, alpha-inducible protein 27 [Source:MGI Symbol;Acc:MGI:1277180]	12	1.69723	0.00416115	0.249528	15.5738	26.4196
ENSMUSG00000046058	Eid2	EP300 interacting inhibitor of differentiation 2 [Source:MGI Symbol;Acc:MGI:2681174]	7	-1.73446	0.00416763	0.249528	11.8482	6.8214
ENSMUSG00000040177	2310057M21Rik	RIKEN cDNA 2310057M21 gene [Source:MGI Symbol;Acc:MGI:1915527]	7	-1.71126	0.00418398	0.249528	1.32537	0.774722
ENSMUSG00000096929	A330023F24Rik	RIKEN cDNA A330023F24 gene [Source:MGI Symbol;Acc:MGI:2443958]	1	-2.04514	0.0042036	0.249663	2.19472	1.07222
ENSMUSG00000044037	Als2cl	ALS2 C-terminal like [Source:MGI Symbol;Acc:MGI:2447532]	9	-3.14629	0.00424207	0.250024	0.551579	0.172903
ENSMUSG00000105636	Gm43625	predicted gene 43625 [Source:MGI Symbol;Acc:MGI:5663762]	5	-2.90371	0.00424448	0.250024	2.56182	0.868898
ENSMUSG00000106383	E330034L11Rik	RIKEN cDNA E330034L11 gene [Source:MGI Symbol;Acc:MGI:3026962]	3	-2.20711	0.00431427	0.252657	5.28759	2.39553
ENSMUSG00000101599	Gm20342	predicted gene, 20342 [Source:MGI Symbol;Acc:MGI:5012527]	1	-1.98466	0.00432433	0.252657	1.83842	0.928003
ENSMUSG00000034449	Dhrs11	dehydrogenase/reductase (SDR family) member 11 [Source:MGI Symbol;Acc:MGI:2652816]	11	2.40672	0.00437294	0.254463	1.59802	3.85494
ENSMUSG00000104292	Gm38042	predicted gene, 38042 [Source:MGI Symbol;Acc:MGI:5611270]	8	-3.13529	0.00441726	0.25506	0.69772	0.223487
ENSMUSG00000074171	Gm6658	predicted gene 6658 [Source:MGI Symbol;Acc:MGI:3645470]	8	4.75836	0.00442352	0.25506	0.197873	0.96619
ENSMUSG00000029314	Gpat3	glycerol-3-phosphate acyltransferase 3 [Source:MGI Symbol;Acc:MGI:3603816]	5	-2.60283	0.00448084	0.25506	1.14513	0.438145
ENSMUSG00000106446	Gm42970	predicted gene 42970 [Source:MGI Symbol;Acc:MGI:5663107]	3	-2.24794	0.00448902	0.25506	9.12522	4.07266
ENSMUSG00000105970	Gm43360	predicted gene 43360 [Source:MGI Symbol;Acc:MGI:5663497]	5	-5.08936	0.00450011	0.25506	0.529865	0.10458
ENSMUSG00000006476	Nsmf	NMDA receptor synaptonuclear signaling and neuronal migration factor [Source:MGI Symbol;Acc:MGI:1861755]	2	-1.57446	0.00450631	0.25506	6.98346	4.44275
ENSMUSG00000022895	Ets2	E26 avian leukemia oncogene 2, 3' domain [Source:MGI Symbol;Acc:MGI:95456]	16	-1.47454	0.00450742	0.25506	6.51229	4.41302
ENSMUSG00000051678	Pcdhb6	protocadherin beta 6 [Source:MGI Symbol;Acc:MGI:2136740]	18	3.21224	0.00457673	0.257253	0.207974	0.673687
ENSMUSG00000020932	Gfap	glial fibrillary acidic protein [Source:MGI Symbol;Acc:MGI:95697]	11	-1.73108	0.00458198	0.257253	8.53334	4.93187
ENSMUSG00000015932	Dstn	destrin [Source:MGI Symbol;Acc:MGI:1929270]	2	1.3293	0.00460718	0.257451	288.145	383.035
ENSMUSG00000038178	Slc43a2	solute carrier family 43, member 2 [Source:MGI Symbol;Acc:MGI:2442746]	11	1.5075	0.00462134	0.257451	3.46897	5.22897
ENSMUSG00000043923	Ccdc84	coiled-coil domain containing 84 [Source:MGI Symbol;Acc:MGI:2685960]	9	-2.52384	0.00465128	0.258119	1.69989	0.672136
ENSMUSG00000043833	2900005J15Rik	RIKEN cDNA 2900005J15 gene [Source:MGI Symbol;Acc:MGI:1914511]	5	-2.36957	0.00482672	0.266825	2.12917	0.896196
ENSMUSG00000087620	5330434G04Rik	RIKEN cDNA 5330434G04 gene [Source:MGI Symbol;Acc:MGI:1925519]	X	-2.38149	0.00487413	0.2675	0.940166	0.393318
ENSMUSG00000049502	Dtx3l	deltex 3-like, E3 ubiquitin ligase [Source:MGI Symbol;Acc:MGI:2656973]	16	1.8429	0.00487616	0.2675	1.37623	2.53506
ENSMUSG00000104394	Gm37254	predicted gene, 37254 [Source:MGI Symbol;Acc:MGI:5610482]	1	-2.58269	0.00494185	0.268253	1.2263	0.469714
ENSMUSG00000103085	Gm38120	predicted gene, 38120 [Source:MGI Symbol;Acc:MGI:5611348]	1	-2.51042	0.0049428	0.268253	1.47425	0.591654
ENSMUSG00000109005	Gm45221	predicted gene 45221 [Source:MGI Symbol;Acc:MGI:5753797]	7	-2.3051	0.00494588	0.268253	3.28755	1.43317
ENSMUSG00000105341	Gm43817	predicted gene 43817 [Source:MGI Symbol;Acc:MGI:5663954]	5	-2.70796	0.00512322	0.276827	1.7385	0.640998
ENSMUSG00000019102	Aldh3a1	aldehyde dehydrogenase family 3, subfamily A1 [Source:MGI Symbol;Acc:MGI:1353451]	11	1.4645	0.00522676	0.281364	500.947	733.606
ENSMUSG00000104284	Gm10862	predicted gene 10862 [Source:MGI Symbol;Acc:MGI:3641622]	2	-3.3022	0.00531263	0.282571	1.38873	0.416996
ENSMUSG00000063558	Aox1	aldehyde oxidase 1 [Source:MGI Symbol;Acc:MGI:88035]	1	-1.60708	0.00532126	0.282571	4.12994	2.56615
ENSMUSG00000043639	Rbm20	RNA binding motif protein 20 [Source:MGI Symbol;Acc:MGI:1920963]	19	1.36759	0.00532684	0.282571	7.12705	9.74702
ENSMUSG00000108143	Gm44414	predicted gene, 44414 [Source:MGI Symbol;Acc:MGI:5690806]	6	-4.23967	0.00532782	0.282571	0.721515	0.168734
ENSMUSG00000086288	Gm15265	predicted gene 15265 [Source:MGI Symbol;Acc:MGI:3705193]	3	-2.60789	0.00534893	0.282648	6.32199	2.41136
ENSMUSG00000042821	Snai1	snail family zinc finger 1 [Source:MGI Symbol;Acc:MGI:98330]	2	-4.39661	0.00545245	0.287063	0.934796	0.201805
ENSMUSG00000039232	Stx11	syntaxin 11 [Source:MGI Symbol;Acc:MGI:1921982]	10	-1.57795	0.00548176	0.287552	5.2288	3.31023
ENSMUSG00000106528	Gm42841	predicted gene 42841 [Source:MGI Symbol;Acc:MGI:5662978]	3	-4.38835	0.0055021	0.28757	1.48957	0.332235
ENSMUSG00000051648	Kctd19	potassium channel tetramerisation domain containing 19 [Source:MGI Symbol;Acc:MGI:3045294]	8	3.35049	0.00553015	0.287988	0.245512	0.830748
ENSMUSG00000114709	Gm47920	predicted gene, 47920 [Source:MGI Symbol;Acc:MGI:6097174]	14	-3.26311	0.00566601	0.293998	2.14703	0.660687
ENSMUSG00000053714	4732471J01Rik	RIKEN cDNA 4732471J01 gene [Source:MGI Symbol;Acc:MGI:3603586]	7	-3.55794	0.00585144	0.301858	0.746432	0.210212
ENSMUSG00000104591	Gm43145	predicted gene 43145 [Source:MGI Symbol;Acc:MGI:5663282]	5	-4.22651	0.00585948	0.301858	2.12582	0.477256
ENSMUSG00000025372	Baiap2	brain-specific angiogenesis inhibitor 1-associated protein 2 [Source:MGI Symbol;Acc:MGI:2137336]	11	-1.90296	0.00588902	0.302296	2.15382	1.12711
ENSMUSG00000032035	Ets1	E26 avian leukemia oncogene 1, 5' domain [Source:MGI Symbol;Acc:MGI:95455]	9	-3.16315	0.00591384	0.30249	1.68422	0.531928
ENSMUSG00000040280	Ndufa4l2	Ndufa4, mitochondrial complex associated like 2 [Source:MGI Symbol;Acc:MGI:3039567]	10	1.84971	0.00595361	0.302643	11.8544	21.8908
ENSMUSG00000117123	Gm49890	predicted gene, 49890 [Source:MGI Symbol;Acc:MGI:6270578]	4	-1.84831	0.00595896	0.302643	21.8729	11.8457
ENSMUSG00000040659	Efhd2	EF hand domain containing 2 [Source:MGI Symbol;Acc:MGI:106504]	4	1.34669	0.00605509	0.305812	30.1889	40.6779
ENSMUSG00000100789	Gm29508	predicted gene 29508 [Source:MGI Symbol;Acc:MGI:5580214]	12	4.30199	0.0060639	0.305812	0.349748	1.55442
ENSMUSG00000092274	Neat1	nuclear paraspeckle assembly transcript 1 (non-protein coding) [Source:MGI Symbol;Acc:MGI:1914211]	19	-1.95043	0.0061258	0.307854	15.3173	7.85369
ENSMUSG00000105822	Gm42969	predicted gene 42969 [Source:MGI Symbol;Acc:MGI:5663106]	3	-1.98847	0.00614957	0.307972	4.8265	2.42977
ENSMUSG00000027677	Ttc14	tetratricopeptide repeat domain 14 [Source:MGI Symbol;Acc:MGI:1914370]	3	-1.40902	0.00634523	0.315932	5.35851	3.80333
ENSMUSG00000107320	Gm42549	predicted gene 42549 [Source:MGI Symbol;Acc:MGI:5662686]	6	-3.57036	0.00635249	0.315932	0.394024	0.110262
ENSMUSG00000022974	Paxbp1	PAX3 and PAX7 binding protein 1 [Source:MGI Symbol;Acc:MGI:1914617]	16	-1.4003	0.00639338	0.316869	8.7324	6.24192
ENSMUSG00000027832	Ptx3	pentraxin related gene [Source:MGI Symbol;Acc:MGI:104641]	3	-3.19289	0.00644752	0.318454	0.788059	0.242952
ENSMUSG00000019947	Arid5b	AT rich interactive domain 5B (MRF1-like) [Source:MGI Symbol;Acc:MGI:2175912]	10	-1.49227	0.00649063	0.319486	19.4489	13.0368
ENSMUSG00000042734	Ttc9	tetratricopeptide repeat domain 9 [Source:MGI Symbol;Acc:MGI:1916730]	12	-4.5418	0.00652652	0.320156	0.658972	0.142391
ENSMUSG00000047881	Rell1	RELT-like 1 [Source:MGI Symbol;Acc:MGI:2140767]	5	-1.99187	0.00661756	0.3227	2.16068	1.08187
ENSMUSG00000003680	Taf6l	TATA-box binding protein associated factor 6 like [Source:MGI Symbol;Acc:MGI:2444957]	19	2.04228	0.00662331	0.3227	0.813289	1.66478
ENSMUSG00000001131	Timp1	tissue inhibitor of metalloproteinase 1 [Source:MGI Symbol;Acc:MGI:98752]	X	-3.2262	0.00665694	0.3227	2.96113	0.90353
ENSMUSG00000061039	Olfr920	olfactory receptor 920 [Source:MGI Symbol;Acc:MGI:3030754]	9	-2.68943	0.00666818	0.3227	0.905737	0.337407
ENSMUSG00000105584	Gm42588	predicted gene 42588 [Source:MGI Symbol;Acc:MGI:5662725]	5	-3.3754	0.00672309	0.324265	1.77724	0.512959
ENSMUSG00000052305	Hbb-bs	hemoglobin, beta adult s chain [Source:MGI Symbol;Acc:MGI:5474852]	7	-3.71108	0.00675906	0.324351	3.66687	0.997475
ENSMUSG00000076441	Ass1	argininosuccinate synthetase 1 [Source:MGI Symbol;Acc:MGI:88090]	2	1.35361	0.0067777	0.324351	297.69	402.957
ENSMUSG00000050530	Fam171a1	family with sequence similarity 171, member A1 [Source:MGI Symbol;Acc:MGI:2442917]	2	1.35732	0.00681309	0.324351	10.1516	13.7741
ENSMUSG00000110558	Gm45779	predicted gene 45779 [Source:MGI Symbol;Acc:MGI:5804894]	8	-2.71856	0.00681514	0.324351	1.3254	0.488501
ENSMUSG00000106427	Gm42820	predicted gene 42820 [Source:MGI Symbol;Acc:MGI:5662957]	3	-2.86925	0.00690099	0.326701	0.944596	0.326888
ENSMUSG00000037876	Jmjd1c	jumonji domain containing 1C [Source:MGI Symbol;Acc:MGI:1918614]	10	-1.32466	0.00690998	0.326701	13.8302	10.4387
ENSMUSG00000050334	C130071C03Rik	RIKEN cDNA C130071C03 gene [Source:MGI Symbol;Acc:MGI:2443574]	13	-3.74812	0.00696293	0.327079	0.325014	0.0826528
ENSMUSG00000026103	Gls	glutaminase [Source:MGI Symbol;Acc:MGI:95752]	1	-1.3219	0.00697007	0.327079	11.634	8.79959
ENSMUSG00000078868	Gm14412	predicted gene 14412 [Source:MGI Symbol;Acc:MGI:3652251]	2	-2.5532	0.00699196	0.327079	4.39025	1.72657
ENSMUSG00000020740	Gga3	golgi associated, gamma adaptin ear containing, ARF binding protein 3 [Source:MGI Symbol;Acc:MGI:2384159]	11	-1.74493	0.00703501	0.327079	3.14121	1.80123
ENSMUSG00000087373	Gm15892	predicted gene 15892 [Source:MGI Symbol;Acc:MGI:3801833]	11	-3.59077	0.00705948	0.327079	1.48954	0.41751
ENSMUSG00000047767	Atg16l2	autophagy related 16-like 2 (S. cerevisiae) [Source:MGI Symbol;Acc:MGI:1920933]	7	-1.79176	0.0070596	0.327079	1.66932	0.933073
ENSMUSG00000026204	Ptprn	protein tyrosine phosphatase, receptor type, N [Source:MGI Symbol;Acc:MGI:102765]	1	-2.65793	0.00707728	0.327079	1.74838	0.657205
ENSMUSG00000039531	Zup1	zinc finger containing ubiquitin peptidase 1 [Source:MGI Symbol;Acc:MGI:1919830]	10	-1.67295	0.00735012	0.3386	2.84911	1.70585
ENSMUSG00000026873	Phf19	PHD finger protein 19 [Source:MGI Symbol;Acc:MGI:1921266]	2	-3.95612	0.00741405	0.338982	0.358295	0.0904465
ENSMUSG00000058594	Fbh1	F-box DNA helicase 1 [Source:MGI Symbol;Acc:MGI:1354699]	2	1.42228	0.00744763	0.338982	6.3772	9.06251
ENSMUSG00000074024	4632427E13Rik	RIKEN cDNA 4632427E13 gene [Source:MGI Symbol;Acc:MGI:1915436]	7	-1.99452	0.00745224	0.338982	2.63758	1.3246
ENSMUSG00000028369	Svep1	sushi, von Willebrand factor type A, EGF and pentraxin domain containing 1 [Source:MGI Symbol;Acc:MGI:1928849]	4	-5.67803	0.00746821	0.338982	0.217605	0.0368089
ENSMUSG00000031647	Mfap3l	microfibrillar-associated protein 3-like [Source:MGI Symbol;Acc:MGI:1918556]	8	-1.36877	0.00747633	0.338982	9.94682	7.26221
ENSMUSG00000034932	Mrpl54	mitochondrial ribosomal protein L54 [Source:MGI Symbol;Acc:MGI:1913297]	10	1.43139	0.00760679	0.343813	30.0236	42.9525
ENSMUSG00000103364	Gm38157	predicted gene, 38157 [Source:MGI Symbol;Acc:MGI:5611385]	1	-3.88284	0.00769714	0.346806	1.89325	0.476695
ENSMUSG00000109812	Gm45640	predicted gene 45640 [Source:MGI Symbol;Acc:MGI:5791476]	8	-2.56955	0.00780338	0.350113	2.37839	0.920958
ENSMUSG00000106458	Gm42633	predicted gene 42633 [Source:MGI Symbol;Acc:MGI:5662770]	5	-3.95254	0.00781926	0.350113	0.503611	0.124111
ENSMUSG00000026380	Tfcp2l1	transcription factor CP2-like 1 [Source:MGI Symbol;Acc:MGI:2444691]	1	-2.26617	0.00789268	0.351894	1.66791	0.738488
ENSMUSG00000085396	Firre	functional intergenic repeating RNA element [Source:MGI Symbol;Acc:MGI:2147989]	X	-1.45552	0.007908	0.351894	7.09088	4.87513
ENSMUSG00000037965	Zc3h7a	zinc finger CCCH type containing 7 A [Source:MGI Symbol;Acc:MGI:2445044]	16	-1.40176	0.00795149	0.352737	6.14512	4.38598
ENSMUSG00000105449	Gm43379	predicted gene 43379 [Source:MGI Symbol;Acc:MGI:5663516]	3	-2.25285	0.00805863	0.35639	0.671522	0.297929
ENSMUSG00000109157	Gm44829	predicted gene 44829 [Source:MGI Symbol;Acc:MGI:5753405]	7	-2.55226	0.00811266	0.357198	1.33625	0.51848
ENSMUSG00000042625	Safb2	scaffold attachment factor B2 [Source:MGI Symbol;Acc:MGI:2146808]	17	-1.29713	0.00812772	0.357198	15.6359	12.0563
ENSMUSG00000048385	Scrt1	scratch family zinc finger 1 [Source:MGI Symbol;Acc:MGI:2176606]	15	-4.46255	0.00815147	0.357198	0.84552	0.183389
ENSMUSG00000108064	Gm44423	predicted gene, 44423 [Source:MGI Symbol;Acc:MGI:5690815]	6	-2.87447	0.00835178	0.363832	1.14831	0.397269
ENSMUSG00000017978	Cadps2	Ca2+-dependent activator protein for secretion 2 [Source:MGI Symbol;Acc:MGI:2443963]	6	1.30848	0.00835348	0.363832	10.4095	13.6191
ENSMUSG00000054889	Dsp	desmoplakin [Source:MGI Symbol;Acc:MGI:109611]	13	-3.27447	0.00845896	0.366764	0.518936	0.156476
ENSMUSG00000020455	Trim11	tripartite motif-containing 11 [Source:MGI Symbol;Acc:MGI:2137355]	11	-1.57936	0.00852355	0.366764	5.89134	3.72848
ENSMUSG00000037640	Zfp60	zinc finger protein 60 [Source:MGI Symbol;Acc:MGI:99207]	7	1.71381	0.00855054	0.366764	1.37641	2.35725
ENSMUSG00000084846	A730011C13Rik	RIKEN cDNA A730011C13 gene [Source:MGI Symbol;Acc:MGI:2442973]	3	-2.1235	0.00856946	0.366764	2.73436	1.28462
ENSMUSG00000004561	Mettl17	methyltransferase like 17 [Source:MGI Symbol;Acc:MGI:1098577]	14	-1.97283	0.00859607	0.366764	2.18378	1.11015
ENSMUSG00000027397	Slc20a1	solute carrier family 20, member 1 [Source:MGI Symbol;Acc:MGI:108392]	2	-1.37825	0.00861709	0.366764	9.16752	6.64861
ENSMUSG00000035873	Pawr	PRKC, apoptosis, WT1, regulator [Source:MGI Symbol;Acc:MGI:2149961]	10	-1.60415	0.00862443	0.366764	16.3653	10.2099
ENSMUSG00000017817	Jph2	junctophilin 2 [Source:MGI Symbol;Acc:MGI:1891496]	2	1.39575	0.00862494	0.366764	10.9006	15.2112
ENSMUSG00000014599	Csf1	colony stimulating factor 1 (macrophage) [Source:MGI Symbol;Acc:MGI:1339753]	3	-1.53106	0.00874995	0.370249	4.81032	3.13726
ENSMUSG00000031167	Rbm3	RNA binding motif (RNP1, RRM) protein 3 [Source:MGI Symbol;Acc:MGI:1099460]	X	1.33891	0.00877354	0.370249	10.2149	13.6778
ENSMUSG00000021990	Spata13	spermatogenesis associated 13 [Source:MGI Symbol;Acc:MGI:104838]	14	1.33231	0.00878416	0.370249	8.70978	11.6075
ENSMUSG00000068735	Trp53i11	transformation related protein 53 inducible protein 11 [Source:MGI Symbol;Acc:MGI:2670995]	2	1.53645	0.00889933	0.374006	5.13291	7.87906
ENSMUSG00000024835	Coro1b	coronin, actin binding protein 1B [Source:MGI Symbol;Acc:MGI:1345963]	19	-1.41909	0.00903871	0.378756	11.477	8.09016
ENSMUSG00000102856	Gm37084	predicted gene, 37084 [Source:MGI Symbol;Acc:MGI:5610312]	1	-2.06743	0.00915952	0.381605	1.51026	0.73046
ENSMUSG00000033722	BC034090	cDNA sequence BC034090 [Source:MGI Symbol;Acc:MGI:2672904]	1	-1.529	0.00916497	0.381605	6.76839	4.42304
ENSMUSG00000104682	Gm42636	predicted gene 42636 [Source:MGI Symbol;Acc:MGI:5662773]	5	-3.76503	0.00918633	0.381605	2.00101	0.53503
ENSMUSG00000115338	Pnp	purine-nucleoside phosphorylase [Source:MGI Symbol;Acc:MGI:97365]	14	1.80959	0.00927665	0.384246	1.70062	3.07386
ENSMUSG00000079339	Ifit1bl1	interferon induced protein with tetratricpeptide repeats 1B like 1 [Source:MGI Symbol;Acc:MGI:3650685]	19	2.26765	0.00932872	0.385292	1.18528	2.6975
ENSMUSG00000113922	Gm48887	predicted gene, 48887 [Source:MGI Symbol;Acc:MGI:6098646]	13	-3.79379	0.00955813	0.393636	0.797327	0.209499
ENSMUSG00000112300	Gm47976	predicted gene, 47976 [Source:MGI Symbol;Acc:MGI:6097260]	10	-3.43491	0.00968621	0.396663	0.982841	0.278398
ENSMUSG00000049489	Ccnq	cyclin Q [Source:MGI Symbol;Acc:MGI:1916359]	11	1.80748	0.00968681	0.396663	5.34604	9.66537
ENSMUSG00000035473	Galm	galactose mutarotase [Source:MGI Symbol;Acc:MGI:2442420]	17	1.82949	0.00973786	0.39762	2.587	4.73373
ENSMUSG00000003038	Hmgn2	high mobility group nucleosomal binding domain 2 [Source:MGI Symbol;Acc:MGI:96136]	4	1.32162	0.0099601	0.405542	18.118	23.9469
ENSMUSG00000086006	Gm13293	predicted gene 13293 [Source:MGI Symbol;Acc:MGI:3649469]	2	-1.9223	0.0100377	0.406823	8.40292	4.38166
ENSMUSG00000106547	B230303O12Rik	RIKEN cDNA B230303O12 gene [Source:MGI Symbol;Acc:MGI:2442644]	5	-2.21033	0.0100481	0.406823	1.61037	0.731545
ENSMUSG00000074652	Myh7b	myosin, heavy chain 7B, cardiac muscle, beta [Source:MGI Symbol;Acc:MGI:3710243]	2	-1.89664	0.0100875	0.407267	1.84569	0.973477
ENSMUSG00000110411	Gm45457	predicted gene 45457 [Source:MGI Symbol;Acc:MGI:5791293]	8	-3.9302	0.010123	0.407557	0.751103	0.185615
ENSMUSG00000062760	Shisal1	shisa like 1 [Source:MGI Symbol;Acc:MGI:1919551]	15	1.52998	0.0102799	0.412059	3.23851	4.95044
ENSMUSG00000044548	Dact1	dishevelled-binding antagonist of beta-catenin 1 [Source:MGI Symbol;Acc:MGI:1891740]	12	-1.55783	0.0102922	0.412059	5.54401	3.55702
ENSMUSG00000110442	Gm45804	predicted gene 45804 [Source:MGI Symbol;Acc:MGI:5804919]	8	-2.39015	0.0103468	0.413097	2.22322	0.934553
ENSMUSG00000015711	Prune1	prune exopolyphosphatase [Source:MGI Symbol;Acc:MGI:1925152]	3	1.56594	0.0105171	0.418732	3.58205	5.60576
ENSMUSG00000058064	Gm10036	predicted gene 10036 [Source:MGI Symbol;Acc:MGI:3642334]	18	1.91363	0.0106502	0.421706	14.0956	27.0464
ENSMUSG00000104728	Gm42462	predicted gene 42462 [Source:MGI Symbol;Acc:MGI:5662599]	5	-3.13522	0.0106505	0.421706	2.40863	0.763802
ENSMUSG00000097392	Thoc2l	THO complex subunit 2-like [Source:MGI Symbol;Acc:MGI:3040669]	5	-1.40774	0.0108599	0.426818	5.66657	4.02544
ENSMUSG00000026589	Sec16b	SEC16 homolog B (S. cerevisiae) [Source:MGI Symbol;Acc:MGI:2148802]	1	-2.49169	0.0108782	0.426818	0.85191	0.344489
ENSMUSG00000026657	Frmd4a	FERM domain containing 4A [Source:MGI Symbol;Acc:MGI:1919850]	2	-1.40409	0.0109286	0.426818	3.03933	2.16664
ENSMUSG00000066647	Gm5113	predicted gene 5113 [Source:MGI Symbol;Acc:MGI:3644651]	7	1.83994	0.0109296	0.426818	1.02538	1.88875
ENSMUSG00000050830	Vwc2	von Willebrand factor C domain containing 2 [Source:MGI Symbol;Acc:MGI:2442987]	11	-4.5083	0.0109565	0.426818	0.473061	0.101206
ENSMUSG00000025283	Sat1	spermidine/spermine N1-acetyl transferase 1 [Source:MGI Symbol;Acc:MGI:98233]	X	-1.50329	0.0109738	0.426818	9.12658	6.06056
ENSMUSG00000097021	4933433G15Rik	RIKEN cDNA 4933433G15 gene [Source:MGI Symbol;Acc:MGI:1918524]	9	-3.99153	0.0109875	0.426818	0.583728	0.146863
ENSMUSG00000092354	Gm20548	predicted gene 20548 [Source:MGI Symbol;Acc:MGI:5142013]	5	-4.35472	0.0110423	0.427791	0.797871	0.184436
ENSMUSG00000104641	Gm43290	predicted gene 43290 [Source:MGI Symbol;Acc:MGI:5663427]	5	-3.28937	0.0111013	0.428923	1.4236	0.431543
ENSMUSG00000049866	Arl4c	ADP-ribosylation factor-like 4C [Source:MGI Symbol;Acc:MGI:2445172]	1	-1.67235	0.0111961	0.431159	3.66851	2.19009
ENSMUSG00000093908	Gm5784	predicted gene 5784 [Source:MGI Symbol;Acc:MGI:3647969]	12	-2.79721	0.0112192	0.431159	0.753462	0.269564
ENSMUSG00000084408	Gm11870	predicted gene 11870 [Source:MGI Symbol;Acc:MGI:3650285]	4	-3.24758	0.0112865	0.431757	2.31108	0.712577
ENSMUSG00000103441	7530428D23Rik	RIKEN cDNA 7530428D23 gene [Source:MGI Symbol;Acc:MGI:2442162]	3	1.33242	0.0112948	0.431757	62.1887	82.8677
ENSMUSG00000107411	Gm19040	predicted gene, 19040 [Source:MGI Symbol;Acc:MGI:5011225]	6	-3.2319	0.0113308	0.431984	0.554691	0.172107
ENSMUSG00000115210	Gm49308	predicted gene, 49308 [Source:MGI Symbol;Acc:MGI:6118810]	14	-2.94003	0.0113834	0.432341	0.738471	0.25309
ENSMUSG00000095123	Gm21781	predicted gene, 21781 [Source:MGI Symbol;Acc:MGI:5433945]	10	-1.76552	0.0114405	0.432341	2.35072	1.33184
ENSMUSG00000052707	Tnrc6a	trinucleotide repeat containing 6a [Source:MGI Symbol;Acc:MGI:2385292]	7	-1.29398	0.011449	0.432341	13.1374	10.155
ENSMUSG00000051650	B3gnt2	UDP-GlcNAc:betaGal beta-1,3-N-acetylglucosaminyltransferase 2 [Source:MGI Symbol;Acc:MGI:1889505]	11	-3.42461	0.0114605	0.432341	0.401938	0.111786
ENSMUSG00000064372	mt-Tp	mitochondrially encoded tRNA proline [Source:MGI Symbol;Acc:MGI:102478]	MT	-2.34887	0.0115694	0.434215	58.0113	24.5375
ENSMUSG00000039954	Stk32a	serine/threonine kinase 32A [Source:MGI Symbol;Acc:MGI:2442403]	18	2.46385	0.0115858	0.434215	0.205735	0.511478
ENSMUSG00000116226	Gm49502	predicted gene, 49502 [Source:MGI Symbol;Acc:MGI:6155188]	15	-3.91661	0.0116008	0.434215	1.12398	0.291622
ENSMUSG00000033207	Mamdc2	MAM domain containing 2 [Source:MGI Symbol;Acc:MGI:1918988]	19	-2.29303	0.0116622	0.434306	1.86498	0.812399
ENSMUSG00000075318	Scn2a	sodium channel, voltage-gated, type II, alpha [Source:MGI Symbol;Acc:MGI:98248]	2	-1.79858	0.0116729	0.434306	0.938071	0.521079
ENSMUSG00000104052	Gm38125	predicted gene, 38125 [Source:MGI Symbol;Acc:MGI:5611353]	1	-4.61826	0.0116939	0.434306	0.352879	0.0744497
ENSMUSG00000078905	Gm14393	predicted gene 14393 [Source:MGI Symbol;Acc:MGI:3649576]	2	-3.64501	0.011777	0.436264	1.56301	0.405744
ENSMUSG00000034758	Tle6	transducin-like enhancer of split 6 [Source:MGI Symbol;Acc:MGI:2149593]	10	-3.16451	0.011961	0.441099	0.524326	0.164054
ENSMUSG00000027460	Angpt4	angiopoietin 4 [Source:MGI Symbol;Acc:MGI:1336887]	2	-3.41561	0.0119689	0.441099	0.663055	0.194236
ENSMUSG00000068874	Selenbp1	selenium binding protein 1 [Source:MGI Symbol;Acc:MGI:96825]	3	1.4698	0.0120242	0.442005	7.56631	11.1135
ENSMUSG00000016239	Lonrf3	LON peptidase N-terminal domain and ring finger 3 [Source:MGI Symbol;Acc:MGI:1921615]	X	-1.41239	0.0120807	0.44222	10.8947	7.72369
ENSMUSG00000028370	Pappa	pregnancy-associated plasma protein A [Source:MGI Symbol;Acc:MGI:97479]	4	-1.46632	0.012141	0.44222	4.67247	3.19232
ENSMUSG00000024137	E4f1	E4F transcription factor 1 [Source:MGI Symbol;Acc:MGI:109530]	17	-1.46348	0.0121473	0.44222	6.86088	4.68977
ENSMUSG00000025607	Copg2	coatomer protein complex, subunit gamma 2 [Source:MGI Symbol;Acc:MGI:1858683]	6	1.34451	0.0121802	0.44222	9.14566	12.2987
ENSMUSG00000050447	Lypd6	LY6/PLAUR domain containing 6 [Source:MGI Symbol;Acc:MGI:2443848]	2	1.39749	0.0121839	0.44222	10.3426	14.4521
ENSMUSG00000004668	Abca13	ATP-binding cassette, sub-family A (ABC1), member 13 [Source:MGI Symbol;Acc:MGI:2388707]	11	-3.15357	0.0122988	0.445265	0.0965217	0.030192
ENSMUSG00000001750	Tcirg1	T cell, immune regulator 1, ATPase, H+ transporting, lysosomal V0 protein A3 [Source:MGI Symbol;Acc:MGI:1350931]	19	-1.86814	0.0124013	0.447847	2.07666	1.10712
ENSMUSG00000028967	Errfi1	ERBB receptor feedback inhibitor 1 [Source:MGI Symbol;Acc:MGI:1921405]	4	-1.38129	0.0124478	0.448402	16.7321	12.1183
ENSMUSG00000021319	Sfrp4	secreted frizzled-related protein 4 [Source:MGI Symbol;Acc:MGI:892010]	13	-3.69393	0.0125362	0.450457	0.526634	0.144174
ENSMUSG00000107286	Gm43788	predicted gene 43788 [Source:MGI Symbol;Acc:MGI:5663925]	5	-3.19678	0.0125752	0.450732	1.52389	0.479729
ENSMUSG00000031596	Slc7a2	solute carrier family 7 (cationic amino acid transporter, y+ system), member 2 [Source:MGI Symbol;Acc:MGI:99828]	8	1.34687	0.0126761	0.453217	91.3035	122.974
ENSMUSG00000025195	Dnmbp	dynamin binding protein [Source:MGI Symbol;Acc:MGI:1917352]	19	-1.3213	0.0128147	0.456129	17.1204	12.9636
ENSMUSG00000042828	Trim72	tripartite motif-containing 72 [Source:MGI Symbol;Acc:MGI:3612190]	7	-3.84985	0.0128607	0.456129	1.03881	0.258745
ENSMUSG00000053980	Gm9930	predicted gene 9930 [Source:MGI Symbol;Acc:MGI:3642400]	10	-2.83521	0.0128773	0.456129	1.76875	0.623451
ENSMUSG00000093677	Gm20712	predicted gene 20712 [Source:MGI Symbol;Acc:MGI:5313159]	15	-3.17893	0.0128844	0.456129	1.53258	0.485631
ENSMUSG00000112067	Gm48015	predicted gene, 48015 [Source:MGI Symbol;Acc:MGI:6097323]	12	-2.5854	0.0129544	0.456927	3.1683	1.21805
ENSMUSG00000033257	Ttll4	tubulin tyrosine ligase-like family, member 4 [Source:MGI Symbol;Acc:MGI:1914784]	1	-1.44249	0.0129706	0.456927	2.921	2.02396
ENSMUSG00000039367	Sec24c	Sec24 related gene family, member C (S. cerevisiae) [Source:MGI Symbol;Acc:MGI:1919746]	14	1.30442	0.0130437	0.458378	9.26318	12.0817
ENSMUSG00000015647	Lama5	laminin, alpha 5 [Source:MGI Symbol;Acc:MGI:105382]	2	-1.28047	0.0131138	0.458833	34.2766	26.7685
ENSMUSG00000051855	Mest	mesoderm specific transcript [Source:MGI Symbol;Acc:MGI:96968]	6	1.39536	0.0131205	0.458833	14.5827	20.3333
ENSMUSG00000102931	Gm38114	predicted gene, 38114 [Source:MGI Symbol;Acc:MGI:5611342]	6	-4.20257	0.0132464	0.461777	1.02948	0.249725
ENSMUSG00000090083	Rnf8	ring finger protein 8 [Source:MGI Symbol;Acc:MGI:1929069]	17	-1.86236	0.0132781	0.461777	0.817986	0.438171
ENSMUSG00000043822	Adamtsl5	ADAMTS-like 5 [Source:MGI Symbol;Acc:MGI:1913798]	10	-1.96777	0.013301	0.461777	1.35052	0.686023
ENSMUSG00000028060	Khdc4	KH domain containing 4, pre-mRNA splicing factor [Source:MGI Symbol;Acc:MGI:1921450]	3	-1.37308	0.0134178	0.464709	6.40628	4.66969
ENSMUSG00000053964	Lgals4	lectin, galactose binding, soluble 4 [Source:MGI Symbol;Acc:MGI:107536]	7	-2.43303	0.0135078	0.465973	1.64591	0.671781
ENSMUSG00000102419	Gm36940	predicted gene, 36940 [Source:MGI Symbol;Acc:MGI:5610168]	9	-3.35591	0.0135191	0.465973	1.6066	0.47527
ENSMUSG00000017830	Dhx58	DEXH (Asp-Glu-X-His) box polypeptide 58 [Source:MGI Symbol;Acc:MGI:1931560]	11	3.24347	0.0136113	0.4666	0.133043	0.439627
ENSMUSG00000029864	Gstk1	glutathione S-transferase kappa 1 [Source:MGI Symbol;Acc:MGI:1923513]	6	1.83043	0.0136212	0.4666	3.93464	7.21762
ENSMUSG00000022556	Hsf1	heat shock factor 1 [Source:MGI Symbol;Acc:MGI:96238]	15	-1.41465	0.0136347	0.4666	5.13905	3.62701
ENSMUSG00000092183	4930515G01Rik	RIKEN cDNA 4930515G01 gene [Source:MGI Symbol;Acc:MGI:1914892]	5	-3.90179	0.0136922	0.467453	0.798688	0.192495
ENSMUSG00000071192	Wfikkn1	WAP, FS, Ig, KU, and NTR-containing protein 1 [Source:MGI Symbol;Acc:MGI:2670967]	17	-3.64891	0.0137889	0.468586	0.777468	0.209876
ENSMUSG00000038143	Stox2	storkhead box 2 [Source:MGI Symbol;Acc:MGI:1918319]	8	-1.33211	0.0138132	0.468586	3.91551	2.93745
ENSMUSG00000008307	1700109H08Rik	RIKEN cDNA 1700109H08 gene [Source:MGI Symbol;Acc:MGI:1924286]	5	-1.85381	0.0138232	0.468586	3.26719	1.75841
ENSMUSG00000037509	Arhgef4	Rho guanine nucleotide exchange factor (GEF) 4 [Source:MGI Symbol;Acc:MGI:2442507]	1	1.38957	0.013864	0.468866	3.97558	5.52692
ENSMUSG00000107362	Gm40309	predicted gene, 40309 [Source:MGI Symbol;Acc:MGI:5623194]	5	-2.54016	0.013923	0.469754	3.22774	1.28123
ENSMUSG00000025591	Tma16	translation machinery associated 16 [Source:MGI Symbol;Acc:MGI:1913532]	8	-1.48629	0.0140138	0.47074	2.91466	1.9603
ENSMUSG00000105500	Gm42591	predicted gene 42591 [Source:MGI Symbol;Acc:MGI:5662728]	5	-3.49007	0.0140177	0.47074	2.54053	0.714255
ENSMUSG00000065090	Gm23677	predicted gene, 23677 [Source:MGI Symbol;Acc:MGI:5453454]	8	-3.12607	0.0141699	0.474571	20.2712	6.48204
ENSMUSG00000025608	Podxl	podocalyxin-like [Source:MGI Symbol;Acc:MGI:1351317]	6	1.31323	0.0141978	0.474571	20.4972	26.9119
ENSMUSG00000115161	Gm20555	predicted gene, 20555 [Source:MGI Symbol;Acc:MGI:5295662]	15	-2.50371	0.0142491	0.47518	0.945021	0.376383
ENSMUSG00000022119	Rbm26	RNA binding motif protein 26 [Source:MGI Symbol;Acc:MGI:1921463]	14	-1.30911	0.0143154	0.47559	11.8402	9.04821
ENSMUSG00000019837	Gtf3c6	general transcription factor IIIC, polypeptide 6, alpha [Source:MGI Symbol;Acc:MGI:1914621]	10	1.33387	0.0143276	0.47559	18.3591	24.5046
ENSMUSG00000025381	Cnpy2	canopy FGF signaling regulator 2 [Source:MGI Symbol;Acc:MGI:1928477]	10	1.39932	0.0144554	0.478727	14.8889	20.8181
ENSMUSG00000037239	Spred3	sprouty-related EVH1 domain containing 3 [Source:MGI Symbol;Acc:MGI:2142186]	7	-1.95143	0.014512	0.479495	1.17801	0.600744
ENSMUSG00000016356	Col20a1	collagen, type XX, alpha 1 [Source:MGI Symbol;Acc:MGI:1920618]	2	-2.33445	0.0146885	0.483726	1.49612	0.640996
ENSMUSG00000032842	Abcc10	ATP-binding cassette, sub-family C (CFTR/MRP), member 10 [Source:MGI Symbol;Acc:MGI:2386976]	17	-1.8374	0.014718	0.483726	1.30251	0.706932
ENSMUSG00000020400	Tnip1	TNFAIP3 interacting protein 1 [Source:MGI Symbol;Acc:MGI:1926194]	11	-1.34483	0.0147581	0.483726	16.8048	12.5095
ENSMUSG00000030170	Wnt5b	wingless-type MMTV integration site family, member 5B [Source:MGI Symbol;Acc:MGI:98959]	6	1.39112	0.0147746	0.483726	19.1819	26.6828
ENSMUSG00000105643	Gm42611	predicted gene 42611 [Source:MGI Symbol;Acc:MGI:5662748]	3	-3.04661	0.0148427	0.484852	0.99816	0.320619
ENSMUSG00000033581	Igf2bp2	insulin-like growth factor 2 mRNA binding protein 2 [Source:MGI Symbol;Acc:MGI:1890358]	16	-1.57793	0.0148923	0.485368	2.84276	1.805
ENSMUSG00000000530	Acvrl1	activin A receptor, type II-like 1 [Source:MGI Symbol;Acc:MGI:1338946]	15	3.30842	0.0150124	0.487399	0.0953691	0.320274
ENSMUSG00000032249	Anp32a	acidic (leucine-rich) nuclear phosphoprotein 32 family, member A [Source:MGI Symbol;Acc:MGI:108447]	9	1.31502	0.0150271	0.487399	82.9791	109.128
ENSMUSG00000108077	6330415B21Rik	RIKEN cDNA 6330415B21 gene [Source:MGI Symbol;Acc:MGI:1918003]	6	-3.32807	0.0151011	0.487399	1.71973	0.513194
ENSMUSG00000025644	Gm7628	predicted gene 7628 [Source:MGI Symbol;Acc:MGI:3643956]	9	-4.10514	0.0151281	0.487399	1.0705	0.259519
ENSMUSG00000020812	Snhg16	small nucleolar RNA host gene 16 [Source:MGI Symbol;Acc:MGI:1913543]	11	-1.88326	0.015138	0.487399	2.56711	1.36664
ENSMUSG00000004565	Pnpla6	patatin-like phospholipase domain containing 6 [Source:MGI Symbol;Acc:MGI:1354723]	8	-1.36938	0.015183	0.487399	4.70483	3.43299
ENSMUSG00000103651	Gm37206	predicted gene, 37206 [Source:MGI Symbol;Acc:MGI:5610434]	19	-1.90227	0.015192	0.487399	2.86643	1.50393
ENSMUSG00000027737	Slc7a11	solute carrier family 7 (cationic amino acid transporter, y+ system), member 11 [Source:MGI Symbol;Acc:MGI:1347355]	3	1.34275	0.0152438	0.487769	16.1186	21.6398
ENSMUSG00002076173			16	2.35904	0.0152714	0.487769	7646.8	18038.9
ENSMUSG00000045934	Mtmr11	myotubularin related protein 11 [Source:MGI Symbol;Acc:MGI:2652817]	3	-2.58434	0.015318	0.488173	1.22205	0.472579
ENSMUSG00000028364	Tnc	tenascin C [Source:MGI Symbol;Acc:MGI:101922]	4	-8.07422	0.0153727	0.488266	1.17843	0.144133
ENSMUSG00000030225	Dera	deoxyribose-phosphate aldolase (putative) [Source:MGI Symbol;Acc:MGI:1913762]	6	1.49721	0.0153889	0.488266	1.78159	2.66725
ENSMUSG00000033909	Usp36	ubiquitin specific peptidase 36 [Source:MGI Symbol;Acc:MGI:1919594]	11	-1.35188	0.0154737	0.489875	5.64363	4.17566
ENSMUSG00000018189	Uchl5	ubiquitin carboxyl-terminal esterase L5 [Source:MGI Symbol;Acc:MGI:1914848]	1	1.41508	0.0155698	0.491836	7.6634	10.8386
ENSMUSG00000048720	Tbc1d12	TBC1D12: TBC1 domain family, member 12 [Source:MGI Symbol;Acc:MGI:2384803]	19	-1.51976	0.0156321	0.492719	4.67611	3.07436
ENSMUSG00000064373	Selenop	selenoprotein P [Source:MGI Symbol;Acc:MGI:894288]	15	1.30584	0.0156901	0.493421	24.0256	31.3648
ENSMUSG00000028782	Adgrb2	adhesion G protein-coupled receptor B2 [Source:MGI Symbol;Acc:MGI:2451244]	4	1.38366	0.015784	0.493421	20.6839	28.6172
ENSMUSG00000034551	Hdx	highly divergent homeobox [Source:MGI Symbol;Acc:MGI:2685226]	X	-2.28044	0.0158054	0.493421	0.798778	0.35178
ENSMUSG00000076433	Cep295nl	CEP295 N-terminal like [Source:MGI Symbol;Acc:MGI:1929713]	11	-2.55553	0.0158092	0.493421	2.67211	1.05033
ENSMUSG00000054702	Ap1s3	adaptor-related protein complex AP-1, sigma 3 [Source:MGI Symbol;Acc:MGI:1891304]	1	-1.62787	0.015826	0.493421	6.43309	3.95427
ENSMUSG00000115276	9930017N22Rik	RIKEN cDNA 9930017N22 gene [Source:MGI Symbol;Acc:MGI:2443961]	15	-1.98685	0.0158988	0.494619	1.90148	0.955289
ENSMUSG00000031516	Dctn6	dynactin 6 [Source:MGI Symbol;Acc:MGI:1343154]	8	1.45559	0.016115	0.499277	5.77624	8.40422
ENSMUSG00000051335	Gfod1	glucose-fructose oxidoreductase domain containing 1 [Source:MGI Symbol;Acc:MGI:2145304]	13	-1.68908	0.016118	0.499277	2.69146	1.59089
ENSMUSG00000106825	2510016D11Rik	RIKEN cDNA 2510016D11 gene [Source:MGI Symbol;Acc:MGI:1917539]	5	-2.56012	0.016427	0.507752	3.55042	1.38676
ENSMUSG00000031209	Heph	hephaestin [Source:MGI Symbol;Acc:MGI:1332240]	X	1.2738	0.0165196	0.508546	8.95107	11.4026
ENSMUSG00000038225	Primpol	primase and polymerase (DNA-directed) [Source:MGI Symbol;Acc:MGI:3603756]	8	-2.05892	0.0165371	0.508546	1.15469	0.55715
ENSMUSG00000058006	Mdn1	midasin AAA ATPase 1 [Source:MGI Symbol;Acc:MGI:1926159]	4	-1.29257	0.0165588	0.508546	4.60443	3.5609
ENSMUSG00000009207	Lnpk	lunapark, ER junction formation factor [Source:MGI Symbol;Acc:MGI:1918115]	2	-1.32205	0.0166243	0.508591	10.5687	7.9998
ENSMUSG00000021719	Rgs7bp	regulator of G-protein signalling 7 binding protein [Source:MGI Symbol;Acc:MGI:106334]	13	-2.46181	0.016631	0.508591	0.727414	0.296262
ENSMUSG00000060733	Ipmk	inositol polyphosphate multikinase [Source:MGI Symbol;Acc:MGI:1916968]	10	-1.37576	0.0167808	0.510993	5.88518	4.27935
ENSMUSG00000022235	Cmbl	carboxymethylenebutenolidase-like (Pseudomonas) [Source:MGI Symbol;Acc:MGI:1916824]	15	1.86554	0.0168027	0.510993	3.24351	6.06056
ENSMUSG00000037379	Spon2	spondin 2, extracellular matrix protein [Source:MGI Symbol;Acc:MGI:1923724]	5	1.40335	0.0168162	0.510993	53.3607	74.8718
ENSMUSG00000085767	Gm13563	predicted gene 13563 [Source:MGI Symbol;Acc:MGI:3652052]	2	-2.66678	0.0168533	0.511038	2.31935	0.875411
ENSMUSG00000056069	Otulinl	OTU deubiquitinase with linear linkage specificity like [Source:MGI Symbol;Acc:MGI:2687281]	15	1.55402	0.0169046	0.511515	4.89321	7.61195
ENSMUSG00000024309	Pfdn6	prefoldin subunit 6 [Source:MGI Symbol;Acc:MGI:95908]	17	1.60083	0.0169723	0.512486	7.82935	12.5407
ENSMUSG00000031939	Taf1d	TATA-box binding protein associated factor, RNA polymerase I, D [Source:MGI Symbol;Acc:MGI:1922566]	9	-1.37267	0.017069	0.51347	4.87773	3.55258
ENSMUSG00000038866	Zcchc2	zinc finger, CCHC domain containing 2 [Source:MGI Symbol;Acc:MGI:2444114]	1	-1.31244	0.0171267	0.51347	13.1366	10.0132
ENSMUSG00000032936	Camkv	CaM kinase-like vesicle-associated [Source:MGI Symbol;Acc:MGI:2384296]	9	-2.84181	0.017142	0.51347	0.774457	0.268666
ENSMUSG00000087739	Gm24644	predicted gene, 24644 [Source:MGI Symbol;Acc:MGI:5454421]	2	-3.29635	0.0171887	0.51347	12.1768	3.67321
ENSMUSG00000025795	Rassf3	Ras association (RalGDS/AF-6) domain family member 3 [Source:MGI Symbol;Acc:MGI:2179722]	10	1.29066	0.0172355	0.51347	25.2108	32.5435
ENSMUSG00000055436	Srsf11	serine and arginine-rich splicing factor 11 [Source:MGI Symbol;Acc:MGI:1916457]	3	-1.25588	0.0172442	0.51347	14.0796	11.2086
ENSMUSG00000020439	Smtn	smoothelin [Source:MGI Symbol;Acc:MGI:1354727]	11	-1.73011	0.0172711	0.51347	3.66888	2.11856
ENSMUSG00000024987	Cyp26a1	cytochrome P450, family 26, subfamily a, polypeptide 1 [Source:MGI Symbol;Acc:MGI:1096359]	19	-1.33954	0.0172907	0.51347	36.5782	27.3236
ENSMUSG00000017724	Etv4	ets variant 4 [Source:MGI Symbol;Acc:MGI:99423]	11	-2.09863	0.0173547	0.514306	1.57985	0.748679
ENSMUSG00000008129	Brme1	break repair meiotic recombinase recruitment factor 1 [Source:MGI Symbol;Acc:MGI:1921916]	8	2.929	0.0175014	0.515078	0.244825	0.727396
ENSMUSG00000048015	Neurod4	neurogenic differentiation 4 [Source:MGI Symbol;Acc:MGI:108055]	10	-2.78878	0.0175304	0.515078	1.2753	0.448675
ENSMUSG00000022668	Gtpbp8	GTP-binding protein 8 (putative) [Source:MGI Symbol;Acc:MGI:1913317]	16	-1.71106	0.0175387	0.515078	3.57272	2.09096
ENSMUSG00000031568	Rwdd4a	RWD domain containing 4A [Source:MGI Symbol;Acc:MGI:2681000]	8	1.33351	0.0175588	0.515078	12.1271	16.1862
ENSMUSG00000038712	Mindy1	MINDY lysine 48 deubiquitinase 1 [Source:MGI Symbol;Acc:MGI:1922257]	3	1.53804	0.0175599	0.515078	1.76936	2.72258
ENSMUSG00000038594	Cep85l	centrosomal protein 85-like [Source:MGI Symbol;Acc:MGI:3642684]	10	-1.47732	0.0176277	0.516013	4.61156	3.12935
ENSMUSG00000067276	Capn6	calpain 6 [Source:MGI Symbol;Acc:MGI:1100850]	X	1.99584	0.0177466	0.517524	0.39742	0.792983
ENSMUSG00000090031	4732440D04Rik	RIKEN cDNA 4732440D04 gene [Source:MGI Symbol;Acc:MGI:3604103]	1	-2.20543	0.0178281	0.517524	0.864382	0.388714
ENSMUSG00000106918	Mrpl33	mitochondrial ribosomal protein L33 [Source:MGI Symbol;Acc:MGI:2137225]	5	-1.8802	0.0178423	0.517524	0.929217	0.494432
ENSMUSG00000071054	Safb	scaffold attachment factor B [Source:MGI Symbol;Acc:MGI:2146974]	17	-1.26832	0.0178617	0.517524	15.185	11.9675
ENSMUSG00000071711	Mpst	mercaptopyruvate sulfurtransferase [Source:MGI Symbol;Acc:MGI:2179733]	15	1.41176	0.0178836	0.517524	10.664	15.0635
ENSMUSG00000033615	Cplx1	complexin 1 [Source:MGI Symbol;Acc:MGI:104727]	5	-2.93612	0.0178953	0.517524	1.7668	0.592914
ENSMUSG00000078949	R3hdml	R3H domain containing-like [Source:MGI Symbol;Acc:MGI:3650937]	2	1.99606	0.0180361	0.520548	270.179	539.284
ENSMUSG00000025348	Itga7	integrin alpha 7 [Source:MGI Symbol;Acc:MGI:102700]	10	-2.37633	0.0182473	0.525589	1.57802	0.663196
ENSMUSG00000114584	Gm47694	predicted gene, 47694 [Source:MGI Symbol;Acc:MGI:6096803]	14	-2.14972	0.0182851	0.525624	0.83142	0.383943
ENSMUSG00000029484	Anxa3	annexin A3 [Source:MGI Symbol;Acc:MGI:1201378]	5	-1.45025	0.0183379	0.526089	9.7029	6.7047
ENSMUSG00000028991	Mtor	mechanistic target of rapamycin kinase [Source:MGI Symbol;Acc:MGI:1928394]	4	1.33752	0.018375	0.526103	46.641	62.3802
ENSMUSG00000096199	Ptrhd1	peptidyl-tRNA hydrolase domain containing 1 [Source:MGI Symbol;Acc:MGI:1916959]	12	2.15096	0.0184569	0.527358	0.651229	1.4086
ENSMUSG00000008855	Hdac5	histone deacetylase 5 [Source:MGI Symbol;Acc:MGI:1333784]	11	-1.34136	0.0184965	0.527358	5.90959	4.40427
ENSMUSG00000030208	Emp1	epithelial membrane protein 1 [Source:MGI Symbol;Acc:MGI:107941]	6	-2.03785	0.018561	0.527358	1.93024	0.947497
ENSMUSG00000035649	Zcchc7	zinc finger, CCHC domain containing 7 [Source:MGI Symbol;Acc:MGI:2442912]	4	-1.3607	0.0185656	0.527358	5.11218	3.75406
ENSMUSG00000014668	Chfr	checkpoint with forkhead and ring finger domains [Source:MGI Symbol;Acc:MGI:2444898]	5	-1.58002	0.0186568	0.528903	6.62053	4.19194
ENSMUSG00000025612	Bach1	BTB and CNC homology 1, basic leucine zipper transcription factor 1 [Source:MGI Symbol;Acc:MGI:894680]	16	-1.38363	0.0188093	0.532177	8.10099	5.84623
ENSMUSG00000031700	Gpt2	glutamic pyruvate transaminase (alanine aminotransferase) 2 [Source:MGI Symbol;Acc:MGI:1915391]	8	-2.22135	0.018885	0.533268	0.798566	0.357453
ENSMUSG00000110161	Gm45494	predicted gene 45494 [Source:MGI Symbol;Acc:MGI:5791330]	9	-3.14381	0.018935	0.533633	4.7126	1.47948
ENSMUSG00000029815	Malsu1	mitochondrial assembly of ribosomal large subunit 1 [Source:MGI Symbol;Acc:MGI:1922843]	6	-1.63933	0.0189959	0.534302	4.30007	2.62706
ENSMUSG00000047146	Tet1	tet methylcytosine dioxygenase 1 [Source:MGI Symbol;Acc:MGI:1098693]	10	1.40447	0.0190614	0.534508	2.35907	3.31324
ENSMUSG00000042810	Krba1	KRAB-A domain containing 1 [Source:MGI Symbol;Acc:MGI:1925077]	6	-1.35596	0.0190911	0.534508	4.36917	3.22174
ENSMUSG00000045725	Prr15	proline rich 15 [Source:MGI Symbol;Acc:MGI:1925254]	6	-2.70502	0.0191148	0.534508	1.02044	0.373729
ENSMUSG00000015289	Lage3	L antigen family, member 3 [Source:MGI Symbol;Acc:MGI:1913442]	X	1.85883	0.0193074	0.538844	1.85069	3.44263
ENSMUSG00000024891	Slc29a2	solute carrier family 29 (nucleoside transporters), member 2 [Source:MGI Symbol;Acc:MGI:1345278]	19	-2.51135	0.0193759	0.539709	1.08749	0.432538
ENSMUSG00000003032	Klf4	Kruppel-like factor 4 (gut) [Source:MGI Symbol;Acc:MGI:1342287]	4	-1.33783	0.0195345	0.543073	25.747	19.2401
ENSMUSG00000048376	F2r	coagulation factor II (thrombin) receptor [Source:MGI Symbol;Acc:MGI:101802]	13	1.26031	0.0197217	0.54722	38.602	48.6443
ENSMUSG00000097571	Jpx	Jpx transcript, Xist activator (non-protein coding) [Source:MGI Symbol;Acc:MGI:2180008]	X	-2.19407	0.0197712	0.547536	0.65067	0.295701
ENSMUSG00000054387	Mdm4	transformed mouse 3T3 cell double minute 4 [Source:MGI Symbol;Acc:MGI:107934]	1	-1.26985	0.0199148	0.549635	6.20549	4.88724
ENSMUSG00000072694	1500011B03Rik	RIKEN cDNA 1500011B03 gene [Source:MGI Symbol;Acc:MGI:1913486]	5	1.38442	0.0199234	0.549635	8.72864	12.0864
ENSMUSG00000002068	Ccne1	cyclin E1 [Source:MGI Symbol;Acc:MGI:88316]	7	-2.68677	0.0201859	0.555536	1.19408	0.445044
ENSMUSG00000033632	AW554918	expressed sequence AW554918 [Source:MGI Symbol;Acc:MGI:2147376]	18	1.38891	0.0202147	0.555536	4.06634	5.64553
ENSMUSG00000037022	Mmaa	methylmalonic aciduria (cobalamin deficiency) type A [Source:MGI Symbol;Acc:MGI:1923805]	8	1.839	0.0205563	0.56203	0.939963	1.72625
ENSMUSG00000108954	Gm44901	predicted gene 44901 [Source:MGI Symbol;Acc:MGI:5753477]	7	-2.17226	0.0205657	0.56203	1.05871	0.487851
ENSMUSG00000008999	Bmp7	bone morphogenetic protein 7 [Source:MGI Symbol;Acc:MGI:103302]	2	1.26928	0.0205683	0.56203	26.5825	33.7331
ENSMUSG00000051864	Tbc1d22a	TBC1 domain family, member 22a [Source:MGI Symbol;Acc:MGI:1289265]	15	1.38052	0.0206466	0.5631	7.14197	9.85591
ENSMUSG00000085620	G630018N14Rik	RIKEN cDNA G630018N14 gene [Source:MGI Symbol;Acc:MGI:3041239]	13	-3.54066	0.0206936	0.563312	0.395831	0.108496
ENSMUSG00000074863	Platr25	pluripotency associated transcript 25 [Source:MGI Symbol;Acc:MGI:3645613]	13	1.82014	0.0208044	0.564817	0.826361	1.50858
ENSMUSG00000031343	Gabra3	gamma-aminobutyric acid (GABA) A receptor, subunit alpha 3 [Source:MGI Symbol;Acc:MGI:95615]	X	-1.55143	0.0208407	0.564817	4.26855	2.75339
ENSMUSG00000002767	Mrpl2	mitochondrial ribosomal protein L2 [Source:MGI Symbol;Acc:MGI:1351622]	17	1.52499	0.0208668	0.564817	10.0021	15.2713
ENSMUSG00000104063	Pcdhgb7	protocadherin gamma subfamily B, 7 [Source:MGI Symbol;Acc:MGI:1935199]	18	-1.63683	0.0209561	0.56617	3.07253	1.87881
ENSMUSG00000005483	Dnajb1	DnaJ heat shock protein family (Hsp40) member B1 [Source:MGI Symbol;Acc:MGI:1931874]	8	1.43888	0.021199	0.570611	14.3562	20.6491
ENSMUSG00000108557	Gm44835	predicted gene 44835 [Source:MGI Symbol;Acc:MGI:5753411]	7	-3.43356	0.0211999	0.570611	0.558482	0.161206
ENSMUSG00000037321	Tap1	transporter 1, ATP-binding cassette, sub-family B (MDR/TAP) [Source:MGI Symbol;Acc:MGI:98483]	17	1.96156	0.0212976	0.571814	0.607549	1.19031
ENSMUSG00000047821	Trim16	tripartite motif-containing 16 [Source:MGI Symbol;Acc:MGI:2137356]	11	-1.90764	0.0213242	0.571814	1.70472	0.894174
ENSMUSG00000028756	Pink1	PTEN induced putative kinase 1 [Source:MGI Symbol;Acc:MGI:1916193]	4	1.28658	0.0213832	0.572329	45.0797	58.0109
ENSMUSG00000032609	Klhdc8b	kelch domain containing 8B [Source:MGI Symbol;Acc:MGI:1925517]	9	-1.47376	0.0214284	0.572473	2.9786	2.02403
ENSMUSG00000051166	Eml5	echinoderm microtubule associated protein like 5 [Source:MGI Symbol;Acc:MGI:2442513]	12	-1.40972	0.0215278	0.572581	5.49217	3.89663
ENSMUSG00000030029	Lrig1	leucine-rich repeats and immunoglobulin-like domains 1 [Source:MGI Symbol;Acc:MGI:107935]	6	1.29037	0.0215662	0.572581	40.0209	51.6329
ENSMUSG00000028648	Ndufs5	NADH:ubiquinone oxidoreductase core subunit S5 [Source:MGI Symbol;Acc:MGI:1890889]	4	1.43237	0.0215688	0.572581	36.8301	52.7697
ENSMUSG00000115955	9530056E24Rik	RIKEN cDNA 9530056E24 gene [Source:MGI Symbol;Acc:MGI:2441750]	2	-2.99902	0.0215918	0.572581	0.900907	0.295472
ENSMUSG00000086849	Gm13840	predicted gene 13840 [Source:MGI Symbol;Acc:MGI:3649479]	5	-3.22092	0.0217636	0.573132	6.27946	1.89087
ENSMUSG00000108190	Gm44731	predicted gene 44731 [Source:MGI Symbol;Acc:MGI:5753307]	6	-2.3814	0.0217974	0.573132	8.99473	3.78277
ENSMUSG00000117231	Gm41609	predicted gene, 41609 [Source:MGI Symbol;Acc:MGI:5624494]	17	-2.67279	0.0217982	0.573132	0.691421	0.256412
ENSMUSG00000029552	Tes	testin LIM domain protein [Source:MGI Symbol;Acc:MGI:105081]	6	-2.72743	0.0218011	0.573132	0.599183	0.215826
ENSMUSG00000015671	Psma2	proteasome subunit alpha 2 [Source:MGI Symbol;Acc:MGI:104885]	13	1.35509	0.0218119	0.573132	8.27083	11.1967
ENSMUSG00000021493	Pdlim7	PDZ and LIM domain 7 [Source:MGI Symbol;Acc:MGI:1914649]	13	-1.27703	0.0219076	0.573994	23.1019	18.0963
ENSMUSG00000006204	Cdcp3	CUB domain containing protein 3 [Source:MGI Symbol;Acc:MGI:1918645]	7	-2.68599	0.0219246	0.573994	1.11981	0.415975
ENSMUSG00000040181	Fmo1	flavin containing monooxygenase 1 [Source:MGI Symbol;Acc:MGI:1310002]	1	1.81729	0.0220299	0.575702	0.831001	1.5099
ENSMUSG00000113511	Gm19046	predicted gene, 19046 [Source:MGI Symbol;Acc:MGI:5011231]	12	-3.02185	0.0220976	0.576285	1.4953	0.493825
ENSMUSG00000034532	Fbxo16	F-box protein 16 [Source:MGI Symbol;Acc:MGI:1354706]	14	2.96223	0.0221324	0.576285	0.219976	0.65407
ENSMUSG00000020704	Asic2	acid-sensing (proton-gated) ion channel 2 [Source:MGI Symbol;Acc:MGI:1100867]	11	-1.35782	0.0222549	0.577261	8.22327	6.05031
ENSMUSG00000020773	Trim47	tripartite motif-containing 47 [Source:MGI Symbol;Acc:MGI:1917374]	11	-1.44664	0.0223114	0.577261	11.8333	8.1641
ENSMUSG00000035227	Spcs2	signal peptidase complex subunit 2 homolog (S. cerevisiae) [Source:MGI Symbol;Acc:MGI:1913874]	7	1.36972	0.0223154	0.577261	7.35743	10.0788
ENSMUSG00000107082	Gm36378	predicted gene, 36378 [Source:MGI Symbol;Acc:MGI:5595537]	5	-2.68097	0.0223736	0.577261	7.79635	2.91663
ENSMUSG00000031802	Phxr4	per-hexamer repeat gene 4 [Source:MGI Symbol;Acc:MGI:104522]	9	-2.63232	0.0224108	0.577261	3.75172	1.41868
ENSMUSG00000107468	5730507A11Rik	RIKEN cDNA 5730507A11 gene [Source:MGI Symbol;Acc:MGI:1917874]	2	-2.70472	0.0224109	0.577261	1.57645	0.585252
ENSMUSG00000102302	Gm38190	predicted gene, 38190 [Source:MGI Symbol;Acc:MGI:5611418]	1	-2.65034	0.0224654	0.57763	0.616685	0.231676
ENSMUSG00000040102	Klhl42	kelch-like 42 [Source:MGI Symbol;Acc:MGI:2444786]	6	1.40885	0.02261	0.58007	3.64357	5.13693
ENSMUSG00000111997	Gm5176	predicted gene 5176 [Source:MGI Symbol;Acc:MGI:3644450]	10	-3.48539	0.022641	0.58007	1.80454	0.523106
ENSMUSG00000056476	Med12l	mediator complex subunit 12-like [Source:MGI Symbol;Acc:MGI:2139916]	3	-1.27788	0.0226907	0.580309	12.1041	9.47512
ENSMUSG00000032193	Ldlr	low density lipoprotein receptor [Source:MGI Symbol;Acc:MGI:96765]	9	-1.29702	0.0229753	0.585895	6.69483	5.15677
ENSMUSG00000042428	Mgat3	mannoside acetylglucosaminyltransferase 3 [Source:MGI Symbol;Acc:MGI:104532]	15	1.36039	0.0229907	0.585895	6.32352	8.59888
ENSMUSG00000031818	Cox4i1	cytochrome c oxidase subunit 4I1 [Source:MGI Symbol;Acc:MGI:88473]	8	1.2571	0.0230452	0.586245	86.3958	108.615
ENSMUSG00000017400	Stac2	SH3 and cysteine rich domain 2 [Source:MGI Symbol;Acc:MGI:2144518]	11	1.40469	0.0231209	0.587132	8.19648	11.5132
ENSMUSG00000111394	Gm49759	predicted gene, 49759 [Source:MGI Symbol;Acc:MGI:6215263]	9	-1.97565	0.0233426	0.591318	2.20774	1.12089
ENSMUSG00000046743	Fat4	FAT atypical cadherin 4 [Source:MGI Symbol;Acc:MGI:3045256]	3	1.64212	0.023368	0.591318	31.2858	51.3739
ENSMUSG00000049411	Tmem241	transmembrane protein 241 [Source:MGI Symbol;Acc:MGI:2442435]	18	2.0029	0.023454	0.59245	0.562584	1.13119
ENSMUSG00000102543	Pcdhgc5	protocadherin gamma subfamily C, 5 [Source:MGI Symbol;Acc:MGI:1935205]	18	-2.52045	0.023527	0.593252	0.508998	0.200716
ENSMUSG00000014592	Camta1	calmodulin binding transcription activator 1 [Source:MGI Symbol;Acc:MGI:2140230]	4	-1.44734	0.0237005	0.596581	1.93796	1.33795
ENSMUSG00000027907	S100a11	S100 calcium binding protein A11 [Source:MGI Symbol;Acc:MGI:1338798]	3	1.26178	0.0237796	0.596728	158.229	199.585
ENSMUSG00000028850	Gpatch3	G patch domain containing 3 [Source:MGI Symbol;Acc:MGI:2442492]	4	-1.84926	0.0237894	0.596728	5.01408	2.72054
ENSMUSG00000078247	Airn	antisense Igf2r RNA [Source:MGI Symbol;Acc:MGI:1353471]	17	-1.48282	0.0238824	0.597668	6.06302	4.09878
ENSMUSG00000024501	Dpysl3	dihydropyrimidinase-like 3 [Source:MGI Symbol;Acc:MGI:1349762]	18	-1.47374	0.0239266	0.597668	3.866	2.61958
ENSMUSG00000002504	Slc9a3r2	solute carrier family 9 (sodium/hydrogen exchanger), member 3 regulator 2 [Source:MGI Symbol;Acc:MGI:1890662]	17	-1.79418	0.0239759	0.597668	2.79966	1.55757
ENSMUSG00000109209	Gm45104	predicted gene 45104 [Source:MGI Symbol;Acc:MGI:5753680]	7	-3.17174	0.0240222	0.597668	0.74601	0.234343
ENSMUSG00000021367	Edn1	endothelin 1 [Source:MGI Symbol;Acc:MGI:95283]	13	2.0521	0.0240348	0.597668	2.27936	4.67562
ENSMUSG00000114094	Gm48375	predicted gene, 48375 [Source:MGI Symbol;Acc:MGI:6097851]	13	-3.7017	0.0241948	0.600608	1.44745	0.392437
ENSMUSG00000022792	Yars2	tyrosyl-tRNA synthetase 2 (mitochondrial) [Source:MGI Symbol;Acc:MGI:1917370]	16	-1.76695	0.0242749	0.600856	3.13183	1.77231
ENSMUSG00000104503	Gm37738	predicted gene, 37738 [Source:MGI Symbol;Acc:MGI:5610966]	1	-2.70859	0.0242884	0.600856	0.492775	0.181191
ENSMUSG00000006342	Susd2	sushi domain containing 2 [Source:MGI Symbol;Acc:MGI:1918983]	10	1.25119	0.0244034	0.60211	38.4286	48.0813
ENSMUSG00000104078	Gm37023	predicted gene, 37023 [Source:MGI Symbol;Acc:MGI:5610251]	9	-2.46719	0.0244691	0.60211	1.87967	0.768933
ENSMUSG00000032212	Sltm	SAFB-like, transcription modulator [Source:MGI Symbol;Acc:MGI:1913910]	9	-1.25892	0.0244912	0.60211	9.22204	7.32436
ENSMUSG00000004996	Mri1	methylthioribose-1-phosphate isomerase 1 [Source:MGI Symbol;Acc:MGI:1915123]	8	-1.69705	0.0245067	0.60211	3.52443	2.07846
ENSMUSG00000111264	E030022I16Rik	RIKEN cDNA E030022I16 gene [Source:MGI Symbol;Acc:MGI:2444690]	9	-2.1156	0.0245837	0.602972	2.26921	1.0786
ENSMUSG00000039452	Snx22	sorting nexin 22 [Source:MGI Symbol;Acc:MGI:2685966]	9	1.99728	0.0246964	0.604703	1.07018	2.14268
ENSMUSG00000062014	Gmfb	glia maturation factor, beta [Source:MGI Symbol;Acc:MGI:1927133]	14	1.29868	0.0247437	0.604831	5.66781	7.35945
ENSMUSG00000034875	Nudt19	nudix (nucleoside diphosphate linked moiety X)-type motif 19 [Source:MGI Symbol;Acc:MGI:94203]	7	1.53807	0.0250781	0.611534	5.27802	8.12346
ENSMUSG00000029703	Lrwd1	leucine-rich repeats and WD repeat domain containing 1 [Source:MGI Symbol;Acc:MGI:1918985]	5	-1.87802	0.025103	0.611534	1.23794	0.657205
ENSMUSG00000104501	Gm37736	predicted gene, 37736 [Source:MGI Symbol;Acc:MGI:5610964]	6	-2.57085	0.0251736	0.612216	1.27794	0.499167
ENSMUSG00000019256	Ahr	aryl-hydrocarbon receptor [Source:MGI Symbol;Acc:MGI:105043]	12	-2.55151	0.0252576	0.613223	0.886535	0.343081
ENSMUSG00000002771	Grin2d	glutamate receptor, ionotropic, NMDA2D (epsilon 4) [Source:MGI Symbol;Acc:MGI:95823]	7	-2.59362	0.0254002	0.614584	0.517774	0.195669
ENSMUSG00000043496	Tril	TLR4 interactor with leucine-rich repeats [Source:MGI Symbol;Acc:MGI:1914123]	6	1.40829	0.0254494	0.614584	4.74647	6.6869
ENSMUSG00000085787	Gm13092	predicted gene 13092 [Source:MGI Symbol;Acc:MGI:3649661]	4	-3.97459	0.0254768	0.614584	9.90793	2.39568
ENSMUSG00000042834	Nrep	neuronal regeneration related protein [Source:MGI Symbol;Acc:MGI:99444]	18	1.26103	0.0254847	0.614584	67.6032	85.2492
ENSMUSG00000033715	Akr1c14	aldo-keto reductase family 1, member C14 [Source:MGI Symbol;Acc:MGI:2145458]	13	3.78236	0.0255627	0.615431	0.176094	0.674212
ENSMUSG00000019929	Dcn	decorin [Source:MGI Symbol;Acc:MGI:94872]	10	-3.71616	0.0256207	0.615797	0.574093	0.149779
ENSMUSG00000110928	Gm48114	predicted gene, 48114 [Source:MGI Symbol;Acc:MGI:6097467]	9	-2.16581	0.0256877	0.616377	1.43904	0.667641
ENSMUSG00000001120	Pcbp3	poly(rC) binding protein 3 [Source:MGI Symbol;Acc:MGI:1890470]	10	-1.31368	0.0258029	0.617628	22.1566	16.8477
ENSMUSG00000106612	Gm43750	predicted gene 43750 [Source:MGI Symbol;Acc:MGI:5663887]	3	-1.85597	0.0258258	0.617628	3.61353	1.94076
ENSMUSG00000003273	Car11	carbonic anhydrase 11 [Source:MGI Symbol;Acc:MGI:1336193]	7	-1.84718	0.025878	0.617848	3.44403	1.86921
ENSMUSG00000071604	Fam189a2	family with sequence similarity 189, member A2 [Source:MGI Symbol;Acc:MGI:2685813]	19	-2.15707	0.0260044	0.619836	2.23666	1.02475
ENSMUSG00000021114	Atp6v1d	ATPase, H+ transporting, lysosomal V1 subunit D [Source:MGI Symbol;Acc:MGI:1921084]	12	1.28277	0.0260954	0.62096	10.8173	13.8766
ENSMUSG00000043300	B3galnt1	UDP-GalNAc:betaGlcNAc beta 1,3-galactosaminyltransferase, polypeptide 1 [Source:MGI Symbol;Acc:MGI:1349405]	3	1.4438	0.0262355	0.62096	7.94175	11.4688
ENSMUSG00000104344	Gm38077	predicted gene, 38077 [Source:MGI Symbol;Acc:MGI:5611305]	9	-1.92087	0.0262465	0.62096	2.23523	1.16488
ENSMUSG00000032268	Tmprss5	transmembrane protease, serine 5 (spinesin) [Source:MGI Symbol;Acc:MGI:1933407]	9	-2.02248	0.0262721	0.62096	2.01825	0.989216
ENSMUSG00000109606	Gm45537	predicted gene 45537 [Source:MGI Symbol;Acc:MGI:5791373]	8	-2.42119	0.026307	0.62096	0.967788	0.399449
ENSMUSG00000109536	9330162G02Rik	RIKEN cDNA 9330162G02 gene [Source:MGI Symbol;Acc:MGI:2442217]	7	-2.46637	0.0263495	0.62096	0.113541	0.0458319
ENSMUSG00000091313	Fth-ps2	ferritin heavy chain, pseudogene 2 [Source:MGI Symbol;Acc:MGI:104594]	6	-3.37805	0.026354	0.62096	4.35923	1.2748
ENSMUSG00000037747	Phyhipl	phytanoyl-CoA hydroxylase interacting protein-like [Source:MGI Symbol;Acc:MGI:1918161]	10	-2.51703	0.0264191	0.621477	0.462517	0.181921
ENSMUSG00000071637	Cebpd	CCAAT/enhancer binding protein (C/EBP), delta [Source:MGI Symbol;Acc:MGI:103573]	16	-1.66242	0.0266701	0.623789	8.77958	5.28804
ENSMUSG00000024403	Atp6v1g2	ATPase, H+ transporting, lysosomal V1 subunit G2 [Source:MGI Symbol;Acc:MGI:1913487]	17	-2.1103	0.0267005	0.623789	2.35544	1.10815
ENSMUSG00000087660	B230398E01Rik	RIKEN cDNA B230398E01 gene [Source:MGI Symbol;Acc:MGI:1925930]	3	-2.51539	0.0267606	0.623789	1.13842	0.450861
ENSMUSG00000019790	Stxbp5	syntaxin binding protein 5 (tomosyn) [Source:MGI Symbol;Acc:MGI:1926058]	10	-1.34946	0.0267627	0.623789	2.30916	1.71196
ENSMUSG00000031398	Plxna3	plexin A3 [Source:MGI Symbol;Acc:MGI:107683]	X	-1.32778	0.0268239	0.623789	5.0674	3.81511
ENSMUSG00000041926	Rnpep	arginyl aminopeptidase (aminopeptidase B) [Source:MGI Symbol;Acc:MGI:2384902]	1	-1.50713	0.026862	0.623789	3.34775	2.2275
ENSMUSG00000024378	Stard4	StAR-related lipid transfer (START) domain containing 4 [Source:MGI Symbol;Acc:MGI:2156764]	18	1.40289	0.0268808	0.623789	4.09006	5.74335
ENSMUSG00000027428	Rbbp9	retinoblastoma binding protein 9, serine hydrolase [Source:MGI Symbol;Acc:MGI:1347074]	2	1.3844	0.0268956	0.623789	8.57387	11.882
ENSMUSG00000027849	Syt6	synaptotagmin VI [Source:MGI Symbol;Acc:MGI:1859544]	3	-3.00954	0.0269601	0.623789	0.349445	0.112943
ENSMUSG00000027015	Cybrd1	cytochrome b reductase 1 [Source:MGI Symbol;Acc:MGI:2654575]	2	1.30339	0.0270337	0.623789	20.7855	27.0838
ENSMUSG00000043556	Fbxl7	F-box and leucine-rich repeat protein 7 [Source:MGI Symbol;Acc:MGI:3052506]	15	-2.08538	0.0270478	0.623789	1.14154	0.55016
ENSMUSG00000085385	Snhg17	small nucleolar RNA host gene 17 [Source:MGI Symbol;Acc:MGI:1915358]	2	-1.60475	0.0270754	0.623789	2.10934	1.3182
ENSMUSG00000040751	Lat2	linker for activation of T cells family, member 2 [Source:MGI Symbol;Acc:MGI:1926479]	5	-2.43153	0.0270967	0.623789	1.49103	0.615597
ENSMUSG00000021767	Kat6b	K(lysine) acetyltransferase 6B [Source:MGI Symbol;Acc:MGI:1858746]	14	1.27238	0.0271251	0.623789	8.9838	11.4301
ENSMUSG00000097309	Gm17249	predicted gene, 17249 [Source:MGI Symbol;Acc:MGI:4936883]	10	-2.84722	0.0271818	0.624095	0.438356	0.151185
ENSMUSG00000030852	Tacc2	transforming, acidic coiled-coil containing protein 2 [Source:MGI Symbol;Acc:MGI:1928899]	7	-1.27212	0.0272749	0.625222	55.0593	43.2835
ENSMUSG00000030847	Bag3	BCL2-associated athanogene 3 [Source:MGI Symbol;Acc:MGI:1352493]	7	-1.28	0.0273179	0.625222	36.737	28.7089
ENSMUSG00000028654	Mycl	v-myc avian myelocytomatosis viral oncogene lung carcinoma derived [Source:MGI Symbol;Acc:MGI:96799]	4	2.18396	0.027367	0.625351	0.407835	0.895495
ENSMUSG00000115275	9630050E16Rik	RIKEN cDNA 9630050E16 gene [Source:MGI Symbol;Acc:MGI:2443518]	14	-2.56785	0.027532	0.628122	0.414867	0.160702
ENSMUSG00000117628	Gm50012	predicted gene, 50012 [Source:MGI Symbol;Acc:MGI:6275301]	17	-1.77227	0.0275871	0.628384	4.80919	2.70391
ENSMUSG00000046573	Lyrm4	LYR motif containing 4 [Source:MGI Symbol;Acc:MGI:2683538]	13	1.84078	0.0276626	0.629106	1.76266	3.24845
ENSMUSG00000035967	Ints6l	integrator complex subunit 6 like [Source:MGI Symbol;Acc:MGI:2442593]	X	-1.61052	0.0277671	0.63036	2.30596	1.43647
ENSMUSG00000028549	Itgb3bp	integrin beta 3 binding protein (beta3-endonexin) [Source:MGI Symbol;Acc:MGI:1914983]	4	1.87794	0.0278055	0.63036	0.698843	1.3111
ENSMUSG00000042200	Cdrt4	CMT1A duplicated region transcript 4 [Source:MGI Symbol;Acc:MGI:1913588]	11	1.72871	0.0278637	0.630685	6.85676	11.8494
ENSMUSG00000106320	Gm42992	predicted gene 42992 [Source:MGI Symbol;Acc:MGI:5663129]	5	-1.85228	0.0280021	0.632822	1.39643	0.750977
ENSMUSG00000030376	Slc8a2	solute carrier family 8 (sodium/calcium exchanger), member 2 [Source:MGI Symbol;Acc:MGI:107996]	7	1.9842	0.0280932	0.633453	0.503612	0.997723
ENSMUSG00000028528	Dnajc6	DnaJ heat shock protein family (Hsp40) member C6 [Source:MGI Symbol;Acc:MGI:1919935]	4	1.25286	0.0281182	0.633453	17.6975	22.1697
ENSMUSG00000105624	Gm43187	predicted gene 43187 [Source:MGI Symbol;Acc:MGI:5663324]	5	-3.10177	0.0281923	0.634129	0.749496	0.232928
ENSMUSG00000103937	Gm37186	predicted gene, 37186 [Source:MGI Symbol;Acc:MGI:5610414]	16	-2.8039	0.0283799	0.636861	1.10119	0.396007
ENSMUSG00000064115	Cadm2	cell adhesion molecule 2 [Source:MGI Symbol;Acc:MGI:2442722]	16	1.27422	0.0284199	0.636861	13.4189	17.0966
ENSMUSG00000079523	Tmsb10	thymosin, beta 10 [Source:MGI Symbol;Acc:MGI:109146]	6	1.3019	0.0284467	0.636861	54.3618	70.743
ENSMUSG00000041180	Hectd2	HECT domain E3 ubiquitin protein ligase 2 [Source:MGI Symbol;Acc:MGI:2442663]	19	-2.01282	0.0285653	0.637221	0.680152	0.338733
ENSMUSG00000023905	Tnfrsf12a	tumor necrosis factor receptor superfamily, member 12a [Source:MGI Symbol;Acc:MGI:1351484]	17	-1.51029	0.0286637	0.637221	17.5429	11.6153
ENSMUSG00000053730	Tmem39b	transmembrane protein 39b [Source:MGI Symbol;Acc:MGI:2682939]	4	2.24317	0.0286657	0.637221	0.709741	1.60191
ENSMUSG00000041313	Slc7a1	solute carrier family 7 (cationic amino acid transporter, y+ system), member 1 [Source:MGI Symbol;Acc:MGI:88117]	5	-1.42671	0.0287111	0.637221	3.84621	2.6987
ENSMUSG00000031200	Mtcp1	mature T cell proliferation 1 [Source:MGI Symbol;Acc:MGI:102699]	X	-2.26097	0.0288219	0.637221	0.725462	0.31817
ENSMUSG00000033569	Adgrb3	adhesion G protein-coupled receptor B3 [Source:MGI Symbol;Acc:MGI:2441837]	1	-2.23259	0.028888	0.637221	0.271958	0.120479
ENSMUSG00000112637	Gm48225	predicted gene, 48225 [Source:MGI Symbol;Acc:MGI:6097625]	12	-3.41906	0.0289106	0.637221	0.369964	0.107233
ENSMUSG00000086859	Snhg20	small nucleolar RNA host gene 20 [Source:MGI Symbol;Acc:MGI:1924222]	11	-1.6409	0.0289379	0.637221	4.15219	2.53672
ENSMUSG00000036192	Rorb	RAR-related orphan receptor beta [Source:MGI Symbol;Acc:MGI:1343464]	19	-1.58882	0.0289421	0.637221	1.53632	0.966135
ENSMUSG00000018196	Glrx2	glutaredoxin 2 (thioltransferase) [Source:MGI Symbol;Acc:MGI:1916617]	1	-1.58354	0.0290801	0.637221	2.12495	1.34577
ENSMUSG00000022793	B4galt4	UDP-Gal:betaGlcNAc beta 1,4-galactosyltransferase, polypeptide 4 [Source:MGI Symbol;Acc:MGI:1928387]	16	1.69826	0.0291613	0.637221	1.78557	3.02701
ENSMUSG00000059811	Atl2	atlastin GTPase 2 [Source:MGI Symbol;Acc:MGI:1929492]	17	-1.419	0.0291627	0.637221	2.63818	1.86074
ENSMUSG00000106940	Gm42930	predicted gene 42930 [Source:MGI Symbol;Acc:MGI:5663067]	5	-3.42532	0.0291745	0.637221	0.656631	0.192145
ENSMUSG00000005045	Chd5	chromodomain helicase DNA binding protein 5 [Source:MGI Symbol;Acc:MGI:3036258]	4	-1.54657	0.0292546	0.637221	3.63601	2.35084
ENSMUSG00000078490	Cfap74	cilia and flagella associated protein 74 [Source:MGI Symbol;Acc:MGI:1917130]	4	-2.37639	0.0293325	0.637221	0.397383	0.166234
ENSMUSG00000078502	Zfp268	zinc finger protein 268 [Source:MGI Symbol;Acc:MGI:3651014]	4	2.27208	0.0293756	0.637221	0.654984	1.49266
ENSMUSG00000003469	Phyhip	phytanoyl-CoA hydroxylase interacting protein [Source:MGI Symbol;Acc:MGI:1860417]	14	-2.09534	0.0293757	0.637221	1.41411	0.675084
ENSMUSG00000021418	Rpp40	ribonuclease P 40 subunit [Source:MGI Symbol;Acc:MGI:1346084]	13	-3.0394	0.0293818	0.637221	0.256229	0.0846241
ENSMUSG00000035493	Tgfbi	transforming growth factor, beta induced [Source:MGI Symbol;Acc:MGI:99959]	13	-8.05428	0.029414	0.637221	6.18992	0.766069
ENSMUSG00000030276	Ttll3	tubulin tyrosine ligase-like family, member 3 [Source:MGI Symbol;Acc:MGI:2141418]	6	-2.1269	0.0294204	0.637221	1.2644	0.592286
ENSMUSG00000025359	Pmel	premelanosome protein [Source:MGI Symbol;Acc:MGI:98301]	10	-2.24147	0.0294348	0.637221	3.90554	1.7291
ENSMUSG00000017677	Wsb1	WD repeat and SOCS box-containing 1 [Source:MGI Symbol;Acc:MGI:1926139]	11	-1.29579	0.0294382	0.637221	16.8129	12.9867
ENSMUSG00000102816	Gm37814	predicted gene, 37814 [Source:MGI Symbol;Acc:MGI:5611042]	2	-2.19367	0.0297645	0.642719	1.55266	0.710514
ENSMUSG00000029267	Mtf2	metal response element binding transcription factor 2 [Source:MGI Symbol;Acc:MGI:105050]	5	-1.46528	0.0298221	0.642719	4.08088	2.78153
ENSMUSG00000005237	Dnah2	dynein, axonemal, heavy chain 2 [Source:MGI Symbol;Acc:MGI:107731]	11	-3.13028	0.0298371	0.642719	0.21441	0.0681636
ENSMUSG00000026470	Stx6	syntaxin 6 [Source:MGI Symbol;Acc:MGI:1926235]	1	-1.34602	0.0299904	0.642719	4.2367	3.14954
ENSMUSG00000082315	Gm16523	predicted gene, 16523 [Source:MGI Symbol;Acc:MGI:4360990]	2	-3.29878	0.0299967	0.642719	0.344269	0.105441
ENSMUSG00000107331	Gm42732	predicted gene 42732 [Source:MGI Symbol;Acc:MGI:5662869]	5	-1.83071	0.0300286	0.642719	5.16294	2.80488
ENSMUSG00000040254	Sema3d	sema domain, immunoglobulin domain (Ig), short basic domain, secreted, (semaphorin) 3D [Source:MGI Symbol;Acc:MGI:1860118]	5	1.25169	0.0301246	0.642719	12.6749	15.8577
ENSMUSG00000046694	Tent5b	terminal nucleotidyltransferase 5B [Source:MGI Symbol;Acc:MGI:2140500]	4	1.38207	0.0301357	0.642719	13.1821	18.2161
ENSMUSG00000042286	Stab1	stabilin 1 [Source:MGI Symbol;Acc:MGI:2178742]	14	-1.45266	0.0301685	0.642719	3.1935	2.20352
ENSMUSG00000111097	Gm34069	predicted gene, 34069 [Source:MGI Symbol;Acc:MGI:5593228]	9	-3.98962	0.0301708	0.642719	0.509194	0.13165
ENSMUSG00000020282	Rhbdf1	rhomboid 5 homolog 1 [Source:MGI Symbol;Acc:MGI:104328]	11	-1.34873	0.0302025	0.642719	6.75878	5.01746
ENSMUSG00000073755	5730409E04Rik	RIKEN cDNA 5730409E04Rik gene [Source:MGI Symbol;Acc:MGI:3609248]	4	1.41091	0.0302756	0.642719	6.13274	8.65843
ENSMUSG00000021716	Srek1ip1	splicing regulatory glutamine/lysine-rich protein 1interacting protein 1 [Source:MGI Symbol;Acc:MGI:1914538]	13	1.45067	0.0303314	0.642719	5.56234	8.069
ENSMUSG00000030884	Uqcrc2	ubiquinol cytochrome c reductase core protein 2 [Source:MGI Symbol;Acc:MGI:1914253]	7	1.3329	0.0303647	0.642719	12.5946	16.8044
ENSMUSG00000005682	Pan2	PAN2 poly(A) specific ribonuclease subunit [Source:MGI Symbol;Acc:MGI:1918984]	10	-1.38057	0.030383	0.642719	3.71494	2.68545
ENSMUSG00000021253	Tgfb3	transforming growth factor, beta 3 [Source:MGI Symbol;Acc:MGI:98727]	12	1.40622	0.0304454	0.642719	8.04908	11.3285
ENSMUSG00000030513	Pcsk6	proprotein convertase subtilisin/kexin type 6 [Source:MGI Symbol;Acc:MGI:102897]	7	2.35481	0.0304523	0.642719	0.277521	0.652531
ENSMUSG00000032440	Tgfbr2	transforming growth factor, beta receptor II [Source:MGI Symbol;Acc:MGI:98729]	9	-1.77674	0.0305498	0.642958	1.18469	0.66921
ENSMUSG00000030083	Abtb1	ankyrin repeat and BTB (POZ) domain containing 1 [Source:MGI Symbol;Acc:MGI:1933148]	6	-1.59026	0.0305932	0.642958	2.92415	1.84197
ENSMUSG00000035206	Sppl2b	signal peptide peptidase like 2B [Source:MGI Symbol;Acc:MGI:1920468]	10	1.4779	0.0305996	0.642958	2.83165	4.18689
ENSMUSG00000045319	Proser2	proline and serine rich 2 [Source:MGI Symbol;Acc:MGI:2442238]	2	1.35777	0.0306451	0.642958	4.56567	6.19176
ENSMUSG00000037580	Gch1	GTP cyclohydrolase 1 [Source:MGI Symbol;Acc:MGI:95675]	14	-3.12598	0.0307201	0.642958	0.47098	0.147522
ENSMUSG00000032288	Imp3	IMP3, U3 small nucleolar ribonucleoprotein [Source:MGI Symbol;Acc:MGI:1916119]	9	1.5546	0.0307725	0.642958	11.6153	18.0737
ENSMUSG00000031862	Atp13a1	ATPase type 13A1 [Source:MGI Symbol;Acc:MGI:2180801]	8	-1.32219	0.0307768	0.642958	7.4166	5.60337
ENSMUSG00000019866	Crybg1	crystallin beta-gamma domain containing 1 [Source:MGI Symbol;Acc:MGI:109544]	10	-1.35274	0.0308303	0.64314	7.06751	5.22263
ENSMUSG00000000305	Cdh4	cadherin 4 [Source:MGI Symbol;Acc:MGI:99218]	2	1.37274	0.0308847	0.643341	9.6253	13.2129
ENSMUSG00000108481	Gm33248	predicted gene, 33248 [Source:MGI Symbol;Acc:MGI:5592407]	7	-2.52779	0.0310019	0.644848	2.88275	1.14129
ENSMUSG00000037172	Dennd11	DENN domain containing 11 [Source:MGI Symbol;Acc:MGI:2444256]	6	1.29015	0.0312649	0.649379	5.64912	7.28964
ENSMUSG00000023089	Ndufa5	NADH:ubiquinone oxidoreductase subunit A5 [Source:MGI Symbol;Acc:MGI:1915452]	6	1.35227	0.0313118	0.649415	22.3961	30.2865
ENSMUSG00000109679	Gm45342	predicted gene 45342 [Source:MGI Symbol;Acc:MGI:5791178]	8	-2.84686	0.0314743	0.651301	1.04776	0.358064
ENSMUSG00000024098	Twsg1	twisted gastrulation BMP signaling modulator 1 [Source:MGI Symbol;Acc:MGI:2137520]	17	1.23865	0.0314934	0.651301	33.127	41.0366
ENSMUSG00000108494	Gm45203	predicted gene 45203 [Source:MGI Symbol;Acc:MGI:5753779]	7	-2.34623	0.0315965	0.652496	1.57605	0.669005
ENSMUSG00000036572	Upf3b	UPF3 regulator of nonsense transcripts homolog B (yeast) [Source:MGI Symbol;Acc:MGI:1915384]	X	-1.30106	0.0317269	0.654247	13.0188	10.0003
ENSMUSG00000033439	Trmt13	tRNA methyltransferase 13 [Source:MGI Symbol;Acc:MGI:1925219]	3	-1.81903	0.0317885	0.654579	1.33105	0.733496
ENSMUSG00000037204	Atg101	autophagy related 101 [Source:MGI Symbol;Acc:MGI:1915368]	15	1.60307	0.0319315	0.656583	4.5048	7.22408
ENSMUSG00000047143	Dmrta2	doublesex and mab-3 related transcription factor like family A2 [Source:MGI Symbol;Acc:MGI:2653629]	4	1.26167	0.0319906	0.656786	21.6044	27.2455
ENSMUSG00000034652	Cd300a	CD300A molecule [Source:MGI Symbol;Acc:MGI:2443411]	11	-2.52763	0.0320328	0.656786	0.425454	0.168312
ENSMUSG00000022748	Cmss1	cms small ribosomal subunit 1 [Source:MGI Symbol;Acc:MGI:1913747]	16	1.77126	0.0321479	0.657026	2.9108	5.16565
ENSMUSG00000025927	Tfap2b	transcription factor AP-2 beta [Source:MGI Symbol;Acc:MGI:104672]	1	-2.4377	0.0322002	0.657026	0.80645	0.326489
ENSMUSG00000017861	Mybl2	myeloblastosis oncogene-like 2 [Source:MGI Symbol;Acc:MGI:101785]	2	-2.52467	0.032222	0.657026	0.850266	0.337937
ENSMUSG00000099759	1700030C10Rik	RIKEN cDNA 1700030C10 gene [Source:MGI Symbol;Acc:MGI:1916763]	12	-2.36606	0.0322273	0.657026	2.95389	1.24999
ENSMUSG00000036199	Ndufa13	NADH:ubiquinone oxidoreductase subunit A13 [Source:MGI Symbol;Acc:MGI:1914434]	8	1.23609	0.032397	0.659551	63.1806	78.1211
ENSMUSG00000004677	Myo9b	myosin IXb [Source:MGI Symbol;Acc:MGI:106624]	8	-1.23895	0.032459	0.659877	20.7356	16.734
ENSMUSG00000060992	Copz1	coatomer protein complex, subunit zeta 1 [Source:MGI Symbol;Acc:MGI:1929063]	15	1.319	0.0325177	0.660137	10.7428	14.1606
ENSMUSG00000103624	Gm3081	predicted gene 3081 [Source:MGI Symbol;Acc:MGI:3781258]	9	-2.78523	0.0327726	0.664374	0.797984	0.281168
ENSMUSG00000098702	1500015A07Rik	RIKEN cDNA 1500015A07 gene [Source:MGI Symbol;Acc:MGI:1916232]	18	-2.68573	0.0329299	0.665859	1.25106	0.461512
ENSMUSG00000044641	Pard6b	par-6 family cell polarity regulator beta [Source:MGI Symbol;Acc:MGI:2135605]	2	-1.61279	0.0329385	0.665859	4.01595	2.48628
ENSMUSG00000107813	Gm44434	predicted gene, 44434 [Source:MGI Symbol;Acc:MGI:5690826]	6	-2.13869	0.0331479	0.668853	0.990673	0.463067
ENSMUSG00000106262	Gm43375	predicted gene 43375 [Source:MGI Symbol;Acc:MGI:5663512]	3	-2.70065	0.0331797	0.668853	0.714177	0.259177
ENSMUSG00000034751	Mast4	microtubule associated serine/threonine kinase family member 4 [Source:MGI Symbol;Acc:MGI:1918885]	13	-1.24801	0.03328	0.669495	4.08359	3.27329
ENSMUSG00000102277	A130050O07Rik	RIKEN cDNA A130050O07 gene [Source:MGI Symbol;Acc:MGI:2443458]	1	-2.93689	0.0333294	0.669495	0.514643	0.170218
ENSMUSG00000026193	Fn1	fibronectin 1 [Source:MGI Symbol;Acc:MGI:95566]	1	-3.05259	0.0334723	0.669495	2.81922	0.922034
ENSMUSG00000014956	Ppp1cb	protein phosphatase 1 catalytic subunit beta [Source:MGI Symbol;Acc:MGI:104871]	5	1.23275	0.033489	0.669495	13.4891	16.631
ENSMUSG00000054206	Gzmm	granzyme M (lymphocyte met-ase 1) [Source:MGI Symbol;Acc:MGI:99549]	10	-2.19654	0.0335314	0.669495	2.41439	1.10093
ENSMUSG00000022010	Tsc22d1	TSC22 domain family, member 1 [Source:MGI Symbol;Acc:MGI:109127]	14	1.23615	0.0335808	0.669495	87.3965	108.035
ENSMUSG00000021647	Cartpt	CART prepropeptide [Source:MGI Symbol;Acc:MGI:1351330]	13	-3.74822	0.0335952	0.669495	1.30354	0.328177
ENSMUSG00000034063	4930590J08Rik	RIKEN cDNA 4930590J08 gene [Source:MGI Symbol;Acc:MGI:2685917]	6	-2.09983	0.0336112	0.669495	0.864919	0.407041
ENSMUSG00000025650	Col7a1	collagen, type VII, alpha 1 [Source:MGI Symbol;Acc:MGI:88462]	9	-2.28436	0.0337171	0.669495	0.353902	0.153111
ENSMUSG00000102748	Pcdhgb2	protocadherin gamma subfamily B, 2 [Source:MGI Symbol;Acc:MGI:1935170]	18	-1.66036	0.0337865	0.669495	2.47921	1.48989
ENSMUSG00000003752	Itpkc	inositol 1,4,5-trisphosphate 3-kinase C [Source:MGI Symbol;Acc:MGI:2442554]	7	-1.46785	0.0337869	0.669495	3.35405	2.2803
ENSMUSG00000043801	Oaz1-ps	ornithine decarboxylase antizyme 1, pseudogene [Source:MGI Symbol;Acc:MGI:108188]	17	3.32934	0.0338163	0.669495	0.554295	1.87212
ENSMUSG00000063511	Snrnp70	small nuclear ribonucleoprotein 70 (U1) [Source:MGI Symbol;Acc:MGI:98341]	7	-1.2463	0.0338171	0.669495	13.9785	11.2128
ENSMUSG00000024566	Atp9b	ATPase, class II, type 9B [Source:MGI Symbol;Acc:MGI:1354757]	18	-1.34242	0.0339083	0.670376	4.74438	3.53406
ENSMUSG00000006611	Hfe	homeostatic iron regulator [Source:MGI Symbol;Acc:MGI:109191]	13	1.35035	0.0341222	0.672989	11.3199	15.297
ENSMUSG00000004642	Slbp	stem-loop binding protein [Source:MGI Symbol;Acc:MGI:108402]	5	1.48013	0.0342431	0.672989	2.2109	3.268
ENSMUSG00000067219	Nipal1	NIPA-like domain containing 1 [Source:MGI Symbol;Acc:MGI:1917951]	5	-2.87036	0.0342458	0.672989	0.434627	0.149937
ENSMUSG00000100801	Gm15459	predicted gene 15459 [Source:MGI Symbol;Acc:MGI:3705702]	5	-11.6755	0.0342547	0.672989	64.357	5.50668
ENSMUSG00000034796	Cpne7	copine VII [Source:MGI Symbol;Acc:MGI:2142747]	8	-3.10784	0.0342866	0.672989	0.316892	0.100111
ENSMUSG00000038007	Acer2	alkaline ceramidase 2 [Source:MGI Symbol;Acc:MGI:1920932]	4	-2.0168	0.0343835	0.672989	0.851915	0.418535
ENSMUSG00000035299	Mid1	midline 1 [Source:MGI Symbol;Acc:MGI:1100537]	X	1.43479	0.0344049	0.672989	2.53643	3.63797
ENSMUSG00000024896	Minpp1	multiple inositol polyphosphate histidine phosphatase 1 [Source:MGI Symbol;Acc:MGI:1336159]	19	1.43932	0.034415	0.672989	4.7524	6.83966
ENSMUSG00000040661	Rad54l2	RAD54 like 2 (S. cerevisiae) [Source:MGI Symbol;Acc:MGI:1933196]	9	-1.28929	0.0345914	0.674885	5.58311	4.33494
ENSMUSG00000074415	Mir100hg	Mir100 Mirlet7a-2 Mir125b-1 cluster host gene [Source:MGI Symbol;Acc:MGI:1920394]	9	-1.63017	0.0346059	0.674885	2.08482	1.27982
ENSMUSG00000102732	Gm37342	predicted gene, 37342 [Source:MGI Symbol;Acc:MGI:5610570]	3	-2.73335	0.0347784	0.677197	0.404853	0.147973
ENSMUSG00000106153	Gm43677	predicted gene 43677 [Source:MGI Symbol;Acc:MGI:5663814]	5	-3.04949	0.0348187	0.677197	0.652119	0.210252
ENSMUSG00000018446	C1qbp	complement component 1, q subcomponent binding protein [Source:MGI Symbol;Acc:MGI:1194505]	11	1.29177	0.0348775	0.677343	13.3767	17.2748
ENSMUSG00000061650	Med9	mediator complex subunit 9 [Source:MGI Symbol;Acc:MGI:2183151]	11	1.46861	0.0349204	0.677343	8.49542	12.4878
ENSMUSG00000018858	Mrpl58	mitochondrial ribosomal protein L58 [Source:MGI Symbol;Acc:MGI:1915822]	11	1.4013	0.0349694	0.677379	4.8757	6.82989
ENSMUSG00000102844	Gm38034	predicted gene, 38034 [Source:MGI Symbol;Acc:MGI:5611262]	3	-3.21907	0.0350786	0.678579	0.853937	0.263443
ENSMUSG00000027502	Rtf2	replication termination factor 2 [Source:MGI Symbol;Acc:MGI:1913654]	2	1.29177	0.0352727	0.681417	16.6819	21.5586
ENSMUSG00000038233	Gask1a	golgi associated kinase 1A [Source:MGI Symbol;Acc:MGI:3041196]	9	2.01426	0.0354474	0.683314	0.584722	1.18387
ENSMUSG00000108391	Gm9768	predicted gene 9768 [Source:MGI Symbol;Acc:MGI:3704239]	4	-2.47543	0.0354659	0.683314	0.717028	0.288784
ENSMUSG00000075012	Fjx1	four jointed box 1 [Source:MGI Symbol;Acc:MGI:1341907]	2	-1.58287	0.0356897	0.686705	4.87556	3.06961
ENSMUSG00000024883	Rin1	Ras and Rab interactor 1 [Source:MGI Symbol;Acc:MGI:2385695]	19	-2.70672	0.0357759	0.687443	0.497421	0.182786
ENSMUSG00000039257	Vstm2b	V-set and transmembrane domain containing 2B [Source:MGI Symbol;Acc:MGI:1914525]	7	-2.30538	0.0359189	0.687803	0.960239	0.41663
ENSMUSG00000101678	Gm29609	predicted gene 29609 [Source:MGI Symbol;Acc:MGI:5580315]	5	-2.80459	0.0359265	0.687803	0.557306	0.193137
ENSMUSG00000105728	Gm42819	predicted gene 42819 [Source:MGI Symbol;Acc:MGI:5662956]	3	-1.97925	0.0359838	0.687803	1.2592	0.63448
ENSMUSG00000029623	Pdap1	PDGFA associated protein 1 [Source:MGI Symbol;Acc:MGI:2448536]	5	1.28588	0.0359861	0.687803	14.2935	18.3817
ENSMUSG00000112411	Gm19337	predicted gene, 19337 [Source:MGI Symbol;Acc:MGI:5011522]	10	-3.08285	0.0360872	0.68882	1.79109	0.582991
ENSMUSG00000106904	Gm43029	predicted gene 43029 [Source:MGI Symbol;Acc:MGI:5663166]	6	-2.36176	0.0366835	0.699273	1.74325	0.733503
ENSMUSG00000050144	Slc25a44	solute carrier family 25, member 44 [Source:MGI Symbol;Acc:MGI:2444391]	3	1.3526	0.0367723	0.699807	5.84959	7.91748
ENSMUSG00000020385	Clk4	CDC like kinase 4 [Source:MGI Symbol;Acc:MGI:1098551]	11	-1.29481	0.0368982	0.699807	7.45936	5.76147
ENSMUSG00000032370	Lactb	lactamase, beta [Source:MGI Symbol;Acc:MGI:1933395]	9	1.76025	0.0368997	0.699807	2.29178	4.04193
ENSMUSG00000073274	Gm14636	predicted gene 14636 [Source:MGI Symbol;Acc:MGI:3641976]	X	-2.58186	0.0369063	0.699807	0.362258	0.13951
ENSMUSG00000037921	Ddx60	DExD/H box helicase 60 [Source:MGI Symbol;Acc:MGI:2384570]	8	1.62138	0.0369958	0.700581	1.02966	1.66582
ENSMUSG00000026385	Dbi	diazepam binding inhibitor [Source:MGI Symbol;Acc:MGI:94865]	1	1.24134	0.0371192	0.701162	170.826	212.08
ENSMUSG00000108912	E230020D15Rik	RIKEN cDNA E230020D15 gene [Source:MGI Symbol;Acc:MGI:2442650]	8	-2.99278	0.037124	0.701162	1.59264	0.532433
ENSMUSG00000114501	Gm48582	predicted gene, 48582 [Source:MGI Symbol;Acc:MGI:6098150]	13	-1.97365	0.0373006	0.703206	1.26711	0.643384
ENSMUSG00000037573	Tob1	transducer of ErbB-2.1 [Source:MGI Symbol;Acc:MGI:1349721]	11	1.25059	0.0373301	0.703206	55.5542	69.451
ENSMUSG00000105939	Gm43322	predicted gene 43322 [Source:MGI Symbol;Acc:MGI:5663459]	3	-2.32311	0.0374214	0.703355	2.56766	1.09419
ENSMUSG00000032020	Ubash3b	ubiquitin associated and SH3 domain containing, B [Source:MGI Symbol;Acc:MGI:1920078]	9	-2.18258	0.0374755	0.703355	0.594607	0.270633
ENSMUSG00000041912	Tdrkh	tudor and KH domain containing protein [Source:MGI Symbol;Acc:MGI:1919884]	3	1.34168	0.0375449	0.703355	5.16728	6.93709
ENSMUSG00000041592	Sdk2	sidekick cell adhesion molecule 2 [Source:MGI Symbol;Acc:MGI:2443847]	11	-1.25985	0.0376024	0.703355	6.38662	5.07303
ENSMUSG00000029056	Pank4	pantothenate kinase 4 [Source:MGI Symbol;Acc:MGI:2387466]	4	-1.58407	0.0376637	0.703355	5.79858	3.66107
ENSMUSG00000098040	Gm20757	predicted gene, 20757 [Source:MGI Symbol;Acc:MGI:5434113]	10	-1.66572	0.0376794	0.703355	6.20908	3.73514
ENSMUSG00000027551	Zfp64	zinc finger protein 64 [Source:MGI Symbol;Acc:MGI:107342]	2	-1.38886	0.0376927	0.703355	3.85352	2.77165
ENSMUSG00000033940	Brk1	BRICK1, SCAR/WAVE actin-nucleating complex subunit [Source:MGI Symbol;Acc:MGI:1915406]	6	1.35305	0.0377295	0.703355	21.5372	29.1343
ENSMUSG00000078908	Mon1b	MON1 homolog B, secretory traffciking associated [Source:MGI Symbol;Acc:MGI:1923231]	8	1.28103	0.0378304	0.703498	9.11273	11.6718
ENSMUSG00000028576	Ift74	intraflagellar transport 74 [Source:MGI Symbol;Acc:MGI:1914944]	4	1.31613	0.0378351	0.703498	10.9263	14.3727
ENSMUSG00000084349	Rpl3-ps1	ribosomal protein L3, pseudogene 1 [Source:MGI Symbol;Acc:MGI:3644217]	X	1.85485	0.038043	0.706449	2.28218	4.24012
ENSMUSG00000027947	Il6ra	interleukin 6 receptor, alpha [Source:MGI Symbol;Acc:MGI:105304]	3	-2.61955	0.0382364	0.708854	0.273343	0.101335
ENSMUSG00000049532	Sall2	spalt like transcription factor 2 [Source:MGI Symbol;Acc:MGI:1354373]	14	1.33787	0.0382711	0.708854	4.7291	6.32379
ENSMUSG00000015501	Hivep2	human immunodeficiency virus type I enhancer binding protein 2 [Source:MGI Symbol;Acc:MGI:1338076]	10	-1.37063	0.0384244	0.709952	1.9393	1.41629
ENSMUSG00000025133	Ints4	integrator complex subunit 4 [Source:MGI Symbol;Acc:MGI:1917164]	7	1.2796	0.0384501	0.709952	5.68142	7.26795
ENSMUSG00000108780	5430434F05Rik	RIKEN cDNA 5430434F05 gene [Source:MGI Symbol;Acc:MGI:1925345]	6	-2.07525	0.0385294	0.709952	1.59787	0.76854
ENSMUSG00000106943	Dancr	differentiation antagonizing non-protein coding RNA [Source:MGI Symbol;Acc:MGI:1917286]	5	-2.75181	0.0385658	0.709952	0.71014	0.257094
ENSMUSG00000028792	Ak2	adenylate kinase 2 [Source:MGI Symbol;Acc:MGI:87978]	4	1.31256	0.0385774	0.709952	15.3638	20.1673
ENSMUSG00000049690	Nckap5	NCK-associated protein 5 [Source:MGI Symbol;Acc:MGI:2686394]	1	-1.28979	0.0387121	0.710612	5.82678	4.51834
ENSMUSG00000038984	Tspyl5	testis-specific protein, Y-encoded-like 5 [Source:MGI Symbol;Acc:MGI:2442458]	15	1.69279	0.0387121	0.710612	1.25173	2.12408
ENSMUSG00000074862	BC025920	cDNA sequence BC025920 [Source:MGI Symbol;Acc:MGI:2670983]	10	-2.42485	0.0388025	0.710796	0.691295	0.282137
ENSMUSG00000103696	Gm37531	predicted gene, 37531 [Source:MGI Symbol;Acc:MGI:5610759]	1	-2.47324	0.0389356	0.710796	0.475611	0.193962
ENSMUSG00000104391	Gm37960	predicted gene, 37960 [Source:MGI Symbol;Acc:MGI:5611188]	1	-2.45153	0.038974	0.710796	1.07936	0.431811
ENSMUSG00000021468	Sptlc1	serine palmitoyltransferase, long chain base subunit 1 [Source:MGI Symbol;Acc:MGI:1099431]	13	1.43863	0.0390184	0.710796	4.00443	5.75435
ENSMUSG00000024293	Esco1	establishment of sister chromatid cohesion N-acetyltransferase 1 [Source:MGI Symbol;Acc:MGI:1925055]	18	-1.37342	0.039042	0.710796	6.66569	4.85138
ENSMUSG00000023913	Pla2g7	phospholipase A2, group VII (platelet-activating factor acetylhydrolase, plasma) [Source:MGI Symbol;Acc:MGI:1351327]	17	1.51589	0.0390451	0.710796	4.69129	7.10068
ENSMUSG00000027447	Cst3	cystatin C [Source:MGI Symbol;Acc:MGI:102519]	2	1.23375	0.0390683	0.710796	238.229	293.886
ENSMUSG00000037217	Syn1	synapsin I [Source:MGI Symbol;Acc:MGI:98460]	X	-1.86937	0.0392028	0.712341	1.92338	1.02736
ENSMUSG00000079197	Psme2	proteasome (prosome, macropain) activator subunit 2 (PA28 beta) [Source:MGI Symbol;Acc:MGI:1096365]	14	1.38018	0.0393754	0.714573	12.5474	17.3368
ENSMUSG00000026355	Mcm6	minichromosome maintenance complex component 6 [Source:MGI Symbol;Acc:MGI:1298227]	1	-1.4896	0.0394917	0.714744	3.50157	2.34928
ENSMUSG00000023830	Igf2r	insulin-like growth factor 2 receptor [Source:MGI Symbol;Acc:MGI:96435]	17	-1.24216	0.0395311	0.714744	20.5073	16.5096
ENSMUSG00000071281	Zfp65	zinc finger protein 65 [Source:MGI Symbol;Acc:MGI:107769]	13	1.724	0.0396087	0.714744	1.04347	1.80058
ENSMUSG00000024732	Ccdc86	coiled-coil domain containing 86 [Source:MGI Symbol;Acc:MGI:1277220]	19	1.35481	0.039611	0.714744	3.62527	4.9143
ENSMUSG00000037072	Selenof	selenoprotein F [Source:MGI Symbol;Acc:MGI:1927947]	3	1.23926	0.0396575	0.714744	18.6815	23.1485
ENSMUSG00000106749	Gm43281	predicted gene 43281 [Source:MGI Symbol;Acc:MGI:5663418]	5	-2.38871	0.0396832	0.714744	1.09516	0.453018
ENSMUSG00000046330	Rpl37a	ribosomal protein L37a [Source:MGI Symbol;Acc:MGI:98068]	1	1.26648	0.0398076	0.715085	47.8927	60.6474
ENSMUSG00000039809	Gabbr2	gamma-aminobutyric acid (GABA) B receptor, 2 [Source:MGI Symbol;Acc:MGI:2386030]	4	-2.42408	0.0398442	0.715085	0.758242	0.310224
ENSMUSG00000063160	Numbl	numb-like [Source:MGI Symbol;Acc:MGI:894702]	7	-1.45198	0.0398513	0.715085	2.77142	1.90657
ENSMUSG00000116626	Gm49705	predicted gene, 49705 [Source:MGI Symbol;Acc:MGI:6215167]	16	-1.96917	0.0399603	0.715742	0.851257	0.429019
ENSMUSG00000026471	Mr1	major histocompatibility complex, class I-related [Source:MGI Symbol;Acc:MGI:1195463]	1	-1.5383	0.0399875	0.715742	2.33524	1.51789
ENSMUSG00000110834	Gm39469	predicted gene, 39469 [Source:MGI Symbol;Acc:MGI:5622354]	9	-1.80649	0.0400957	0.716785	14.1964	7.84486
ENSMUSG00000020696	Rffl	ring finger and FYVE like domain containing protein [Source:MGI Symbol;Acc:MGI:1914588]	11	-1.42475	0.0401849	0.717487	4.05261	2.84911
ENSMUSG00000109198	D7Bwg0826e	DNA segment, Chr 7, Brigham & Women's Genetics 0826 expressed [Source:MGI Symbol;Acc:MGI:106455]	7	-2.00263	0.0403884	0.720154	0.967242	0.479453
ENSMUSG00000054708	Ankrd24	ankyrin repeat domain 24 [Source:MGI Symbol;Acc:MGI:1890394]	10	-1.4557	0.0404344	0.720154	2.66188	1.83251
ENSMUSG00000021799	Opn4	opsin 4 (melanopsin) [Source:MGI Symbol;Acc:MGI:1353425]	14	1.88106	0.0406867	0.72375	0.960047	1.80765
ENSMUSG00000078923	Ube2v1	ubiquitin-conjugating enzyme E2 variant 1 [Source:MGI Symbol;Acc:MGI:1913839]	2	-2.74002	0.0407527	0.723989	0.447035	0.159539
ENSMUSG00000070327	Rnf213	ring finger protein 213 [Source:MGI Symbol;Acc:MGI:1289196]	11	1.27354	0.0408009	0.723989	4.31643	5.49375
ENSMUSG00000069755	Zfp125	zinc finger protein 125 [Source:MGI Symbol;Acc:MGI:1336211]	12	1.83842	0.0408571	0.724093	0.878858	1.62362
ENSMUSG00000019845	Tube1	tubulin, epsilon 1 [Source:MGI Symbol;Acc:MGI:1919174]	10	-2.07579	0.0411941	0.728846	0.529084	0.252278
ENSMUSG00000025515	Muc2	mucin 2 [Source:MGI Symbol;Acc:MGI:1339364]	7	-2.63988	0.0412869	0.728846	0.325305	0.12119
ENSMUSG00000031988	Vps26b	VPS26 retromer complex component B [Source:MGI Symbol;Acc:MGI:1917656]	9	1.26078	0.0413135	0.728846	12.3336	15.5393
ENSMUSG00000014767	Tbp	TATA box binding protein [Source:MGI Symbol;Acc:MGI:101838]	17	-1.39182	0.041403	0.728846	1.5247	1.09629
ENSMUSG00000110945	Gm9856	predicted gene 9856 [Source:MGI Symbol;Acc:MGI:3704347]	9	-2.59741	0.0414164	0.728846	1.25399	0.485092
ENSMUSG00000027335	Adra1d	adrenergic receptor, alpha 1d [Source:MGI Symbol;Acc:MGI:106673]	2	-1.91424	0.0414335	0.728846	2.53511	1.31291
ENSMUSG00000062908	Acadm	acyl-Coenzyme A dehydrogenase, medium chain [Source:MGI Symbol;Acc:MGI:87867]	3	1.27003	0.0414803	0.728846	15.5065	19.6822
ENSMUSG00000046364	Rpl27a	ribosomal protein L27A [Source:MGI Symbol;Acc:MGI:1347076]	7	1.23428	0.0415457	0.729104	77.159	95.228
ENSMUSG00000030203	Dusp16	dual specificity phosphatase 16 [Source:MGI Symbol;Acc:MGI:1917936]	6	-1.35931	0.0416328	0.729742	9.52335	7.01165
ENSMUSG00000003352	Cacnb3	calcium channel, voltage-dependent, beta 3 subunit [Source:MGI Symbol;Acc:MGI:103307]	15	1.73019	0.0417482	0.730874	1.23207	2.12872
ENSMUSG00000071793	2610005L07Rik	RIKEN cDNA 2610005L07 gene [Source:MGI Symbol;Acc:MGI:1914283]	8	-1.64441	0.0419539	0.732844	2.72046	1.66033
ENSMUSG00000107865	Gm44417	predicted gene, 44417 [Source:MGI Symbol;Acc:MGI:5690809]	6	-2.70761	0.0419628	0.732844	0.896799	0.33348
ENSMUSG00000039208	Metrnl	meteorin, glial cell differentiation regulator-like [Source:MGI Symbol;Acc:MGI:2384806]	11	1.35774	0.0422013	0.734773	12.0685	16.3837
ENSMUSG00000007207	Stx1a	syntaxin 1A (brain) [Source:MGI Symbol;Acc:MGI:109355]	5	-2.53532	0.0422323	0.734773	1.06957	0.414211
ENSMUSG00000037447	Arid5a	AT rich interactive domain 5A (MRF1-like) [Source:MGI Symbol;Acc:MGI:2443039]	1	-1.4574	0.0422511	0.734773	1.84124	1.26472
ENSMUSG00000084788	Gm11342	predicted gene 11342 [Source:MGI Symbol;Acc:MGI:3652098]	13	2.67315	0.0423	0.734773	0.388933	1.04839
ENSMUSG00000040054	Baz2a	bromodomain adjacent to zinc finger domain, 2A [Source:MGI Symbol;Acc:MGI:2151152]	10	-1.25084	0.0423288	0.734773	12.4476	9.95103
ENSMUSG00000042350	Arel1	apoptosis resistant E3 ubiquitin protein ligase 1 [Source:MGI Symbol;Acc:MGI:1915747]	12	1.26526	0.0424045	0.735199	7.17772	9.07836
ENSMUSG00000089875	Etohd2	ethanol decreased 2 [Source:MGI Symbol;Acc:MGI:1261417]	13	-2.66588	0.0424643	0.735349	0.4294	0.156352
ENSMUSG00000048699	Krt90	keratin 90 [Source:MGI Symbol;Acc:MGI:3045312]	15	2.34514	0.0426993	0.738529	0.380575	0.90155
ENSMUSG00000045672	Col27a1	collagen, type XXVII, alpha 1 [Source:MGI Symbol;Acc:MGI:2672118]	4	-1.5433	0.0427928	0.739257	1.89171	1.22294
ENSMUSG00000020023	Tmcc3	transmembrane and coiled coil domains 3 [Source:MGI Symbol;Acc:MGI:2442900]	10	-1.26728	0.0429609	0.740577	13.9359	10.9988
ENSMUSG00000031492	Chrnb3	cholinergic receptor, nicotinic, beta polypeptide 3 [Source:MGI Symbol;Acc:MGI:106212]	8	-2.76001	0.0430017	0.740577	0.4323	0.158039
ENSMUSG00000055003	Lrtm2	leucine-rich repeats and transmembrane domains 2 [Source:MGI Symbol;Acc:MGI:2141485]	6	1.26211	0.0430239	0.740577	14.7659	18.6363
ENSMUSG00000038859	Baiap2l1	BAI1-associated protein 2-like 1 [Source:MGI Symbol;Acc:MGI:1914148]	5	-1.62895	0.0431965	0.742092	2.76341	1.69718
ENSMUSG00000007338	Mrpl49	mitochondrial ribosomal protein L49 [Source:MGI Symbol;Acc:MGI:108180]	19	1.47004	0.0432151	0.742092	6.05834	8.90244
ENSMUSG00000028459	Cd72	CD72 antigen [Source:MGI Symbol;Acc:MGI:88345]	4	2.73993	0.0433408	0.743362	0.155144	0.428236
ENSMUSG00000074749	Kiz	kizuna centrosomal protein [Source:MGI Symbol;Acc:MGI:2684960]	2	1.29558	0.0434957	0.744306	13.3013	17.2385
ENSMUSG00000040265	Dnm3	dynamin 3 [Source:MGI Symbol;Acc:MGI:1341299]	1	-1.28021	0.0435402	0.744306	1.98158	1.54814
ENSMUSG00000041096	Tspyl2	TSPY-like 2 [Source:MGI Symbol;Acc:MGI:106244]	X	-1.31912	0.0436357	0.744306	20.5489	15.5982
ENSMUSG00000037029	Zfp146	zinc finger protein 146 [Source:MGI Symbol;Acc:MGI:1347092]	7	1.27495	0.043687	0.744306	12.9977	16.579
ENSMUSG00000071172	Srsf3	serine and arginine-rich splicing factor 3 [Source:MGI Symbol;Acc:MGI:98285]	17	1.21429	0.0436886	0.744306	12.1167	14.7149
ENSMUSG00000035394	Cfap53	cilia and flagella associated protein 53 [Source:MGI Symbol;Acc:MGI:1921703]	18	-2.50671	0.0437066	0.744306	1.51648	0.60833
ENSMUSG00000069272	H2ac8	H2A clustered histone 8 [Source:MGI Symbol;Acc:MGI:2448290]	13	3.21749	0.043876	0.745254	1.00855	3.28025
ENSMUSG00000063455	D630045J12Rik	RIKEN cDNA D630045J12 gene [Source:MGI Symbol;Acc:MGI:2669829]	6	-1.27819	0.0439269	0.745254	11.1177	8.70174
ENSMUSG00000040511	Pvr	poliovirus receptor [Source:MGI Symbol;Acc:MGI:107741]	7	-1.63403	0.0439358	0.745254	1.53107	0.939207
ENSMUSG00000043460	Elfn2	leucine rich repeat and fibronectin type III, extracellular 2 [Source:MGI Symbol;Acc:MGI:3608416]	15	-2.31622	0.0439696	0.745254	0.475752	0.202286
ENSMUSG00000051065	Mb21d2	Mab-21 domain containing 2 [Source:MGI Symbol;Acc:MGI:1917028]	16	-1.39653	0.0441111	0.746772	7.02291	5.03888
ENSMUSG00000108572	Gm44883	predicted gene 44883 [Source:MGI Symbol;Acc:MGI:5753459]	7	-2.17099	0.0441828	0.747106	1.24071	0.568382
ENSMUSG00000034384	Barhl2	BarH like homeobox 2 [Source:MGI Symbol;Acc:MGI:1859314]	5	-2.75269	0.0442764	0.747389	0.757702	0.264972
ENSMUSG00000086889	Phf2os1	PHD finger protein 2, opposite strand 1 [Source:MGI Symbol;Acc:MGI:3645592]	13	-2.57263	0.0443315	0.747389	3.96977	1.5383
ENSMUSG00000004100	Ppan	peter pan homolog [Source:MGI Symbol;Acc:MGI:2178445]	9	-1.48054	0.0444475	0.747389	3.99665	2.70257
ENSMUSG00000023034	Nr4a1	nuclear receptor subfamily 4, group A, member 1 [Source:MGI Symbol;Acc:MGI:1352454]	15	-1.46612	0.0444923	0.747389	9.16789	6.24773
ENSMUSG00000029657	Hsph1	heat shock 105kDa/110kDa protein 1 [Source:MGI Symbol;Acc:MGI:105053]	5	-1.23476	0.0445012	0.747389	12.2373	9.90905
ENSMUSG00000015957	Wnt11	wingless-type MMTV integration site family, member 11 [Source:MGI Symbol;Acc:MGI:101948]	7	-2.6018	0.0445311	0.747389	0.339955	0.128868
ENSMUSG00000020235	Fzr1	fizzy and cell division cycle 20 related 1 [Source:MGI Symbol;Acc:MGI:1926790]	10	-1.31485	0.0445636	0.747389	7.71436	5.86593
ENSMUSG00000022500	Litaf	LPS-induced TN factor [Source:MGI Symbol;Acc:MGI:1929512]	16	-1.33233	0.0446627	0.748179	7.93273	5.96371
ENSMUSG00000068917	Clk2	CDC-like kinase 2 [Source:MGI Symbol;Acc:MGI:1098669]	3	-1.35502	0.0447716	0.748524	6.19597	4.56293
ENSMUSG00000086283	2810433D01Rik	RIKEN cDNA 2810433D01 gene [Source:MGI Symbol;Acc:MGI:1924382]	11	1.85416	0.044809	0.748524	2.22609	4.12125
ENSMUSG00000051149	Adnp	activity-dependent neuroprotective protein [Source:MGI Symbol;Acc:MGI:1338758]	2	-1.61293	0.0448537	0.748524	1.92484	1.19042
ENSMUSG00000053062	Jam2	junction adhesion molecule 2 [Source:MGI Symbol;Acc:MGI:1933820]	16	1.21521	0.0448916	0.748524	15.1479	18.4064
ENSMUSG00000054920	Klhl5	kelch-like 5 [Source:MGI Symbol;Acc:MGI:1919028]	5	1.31467	0.0449587	0.748774	4.14745	5.4557
ENSMUSG00000027562	Car2	carbonic anhydrase 2 [Source:MGI Symbol;Acc:MGI:88269]	3	1.22993	0.045198	0.751887	41.151	50.6143
ENSMUSG00000020415	Pttg1	pituitary tumor-transforming gene 1 [Source:MGI Symbol;Acc:MGI:1353578]	11	2.02879	0.0452793	0.75237	2.23256	4.52539
ENSMUSG00000063382	Bcl9l	B cell CLL/lymphoma 9-like [Source:MGI Symbol;Acc:MGI:1933114]	9	1.35375	0.0456747	0.755858	9.02144	12.2052
ENSMUSG00000039069	Mtg2	mitochondrial ribosome associated GTPase 2 [Source:MGI Symbol;Acc:MGI:106565]	2	-1.64732	0.0456971	0.755858	1.58338	0.961685
ENSMUSG00000063430	Wscd2	WSC domain containing 2 [Source:MGI Symbol;Acc:MGI:2445030]	5	1.89598	0.0456991	0.755858	0.205081	0.391334
ENSMUSG00000056234	Ncoa4	nuclear receptor coactivator 4 [Source:MGI Symbol;Acc:MGI:1350932]	14	1.27592	0.0456996	0.755858	4.97366	6.34594
ENSMUSG00000073139	Tmem185a	transmembrane protein 185A [Source:MGI Symbol;Acc:MGI:2448555]	X	1.4241	0.0458275	0.757101	5.7778	8.23423
ENSMUSG00000037419	Endod1	endonuclease domain containing 1 [Source:MGI Symbol;Acc:MGI:1919196]	9	1.27139	0.0459289	0.757184	10.1321	12.878
ENSMUSG00000022765	Snap29	synaptosomal-associated protein 29 [Source:MGI Symbol;Acc:MGI:1914724]	16	1.33074	0.0459378	0.757184	6.35901	8.46041
ENSMUSG00000026939	Tmem141	transmembrane protein 141 [Source:MGI Symbol;Acc:MGI:1098773]	2	1.78118	0.0460194	0.75766	2.84989	5.07975
ENSMUSG00000068250	Amn1	antagonist of mitotic exit network 1 [Source:MGI Symbol;Acc:MGI:2442933]	6	-1.50222	0.0460743	0.757695	0.942991	0.627442
ENSMUSG00000017144	Rnd3	Rho family GTPase 3 [Source:MGI Symbol;Acc:MGI:1921444]	2	-1.28674	0.0462856	0.75999	13.4063	10.4087
ENSMUSG00000017713	Tha1	threonine aldolase 1 [Source:MGI Symbol;Acc:MGI:1919026]	11	-2.65292	0.0463196	0.75999	0.678781	0.255967
ENSMUSG00000083064	Gm7785	predicted gene 7785 [Source:MGI Symbol;Acc:MGI:3645449]	1	-2.27838	0.0463747	0.760026	3.81164	1.68198
ENSMUSG00000020392	Cdkn2aipnl	CDKN2A interacting protein N-terminal like [Source:MGI Symbol;Acc:MGI:1261797]	11	1.48305	0.0464887	0.76098	5.13902	7.63147
ENSMUSG00000027800	Tm4sf1	transmembrane 4 superfamily member 1 [Source:MGI Symbol;Acc:MGI:104678]	3	-1.44611	0.0465387	0.76098	8.21888	5.689
ENSMUSG00000051456	Hspb3	heat shock protein 3 [Source:MGI Symbol;Acc:MGI:1928479]	13	2.25436	0.0466473	0.761641	1.56155	3.5517
ENSMUSG00000041324	Inhba	inhibin beta-A [Source:MGI Symbol;Acc:MGI:96570]	13	1.24934	0.0466851	0.761641	28.809	35.9888
ENSMUSG00000024659	Anxa1	annexin A1 [Source:MGI Symbol;Acc:MGI:96819]	19	1.22842	0.0468361	0.761701	380.608	467.55
ENSMUSG00000025374	Nabp2	nucleic acid binding protein 2 [Source:MGI Symbol;Acc:MGI:1917167]	10	1.28053	0.046879	0.761701	13.8348	17.7088
ENSMUSG00000039936	Pik3cd	phosphatidylinositol-4,5-bisphosphate 3-kinase catalytic subunit delta [Source:MGI Symbol;Acc:MGI:1098211]	4	-1.48215	0.0468981	0.761701	2.65078	1.79301
ENSMUSG00000090516	Rps11-ps1	ribosomal protein S11, pseudogene 1 [Source:MGI Symbol;Acc:MGI:3644744]	9	-2.64232	0.0469912	0.761701	5.40733	2.02234
ENSMUSG00000050217	Lgsn	lengsin, lens protein with glutamine synthetase domain [Source:MGI Symbol;Acc:MGI:2672844]	1	1.60208	0.0470055	0.761701	121.827	195.187
ENSMUSG00000032199	Polr2m	polymerase (RNA) II (DNA directed) polypeptide M [Source:MGI Symbol;Acc:MGI:107282]	9	1.24338	0.0470326	0.761701	61.0485	75.9048
ENSMUSG00000097536	2610037D02Rik	RIKEN cDNA 2610037D02 gene [Source:MGI Symbol;Acc:MGI:1917290]	15	-1.69912	0.0470598	0.761701	1.84738	1.09157
ENSMUSG00000024084	Qpct	glutaminyl-peptide cyclotransferase (glutaminyl cyclase) [Source:MGI Symbol;Acc:MGI:1917786]	17	1.31432	0.047272	0.76361	14.6547	19.2558
ENSMUSG00000029576	Radil	Ras association and DIL domains [Source:MGI Symbol;Acc:MGI:2443088]	5	-2.03377	0.0472942	0.76361	0.706775	0.343949
ENSMUSG00000041119	Pde9a	phosphodiesterase 9A [Source:MGI Symbol;Acc:MGI:1277179]	17	-1.63367	0.0473371	0.76361	3.08809	1.89154
ENSMUSG00000023456	Tpi1	triosephosphate isomerase 1 [Source:MGI Symbol;Acc:MGI:98797]	6	1.23846	0.0475581	0.765111	37.7397	46.7337
ENSMUSG00000097440	Gm6277	predicted gene 6277 [Source:MGI Symbol;Acc:MGI:3779583]	18	-2.11564	0.0476799	0.765111	1.69674	0.801923
ENSMUSG00000044433	Camsap3	calmodulin regulated spectrin-associated protein family, member 3 [Source:MGI Symbol;Acc:MGI:1916947]	8	-1.40621	0.0476934	0.765111	3.4815	2.47723
ENSMUSG00000108102	Gm44437	predicted gene, 44437 [Source:MGI Symbol;Acc:MGI:5690829]	6	-2.83178	0.0477487	0.765111	0.489413	0.16739
ENSMUSG00000068243	Gm7079	predicted pseudogene 7079 [Source:MGI Symbol;Acc:MGI:3643105]	X	2.16717	0.0478237	0.765111	6.93747	15.1255
ENSMUSG00000027875	Hmgcs2	3-hydroxy-3-methylglutaryl-Coenzyme A synthase 2 [Source:MGI Symbol;Acc:MGI:101939]	3	1.25921	0.0478458	0.765111	106.62	134.24
ENSMUSG00000099746	Ppnr	per-pentamer repeat gene [Source:MGI Symbol;Acc:MGI:1349458]	19	-2.40697	0.047921	0.765111	0.846908	0.351139
ENSMUSG00000028480	Glipr2	GLI pathogenesis-related 2 [Source:MGI Symbol;Acc:MGI:1917770]	4	-1.5858	0.0479886	0.765111	5.33031	3.36688
ENSMUSG00000024953	Prdx5	peroxiredoxin 5 [Source:MGI Symbol;Acc:MGI:1859821]	19	1.24517	0.0480076	0.765111	62.1172	77.3436
ENSMUSG00000089870	Gm15562	predicted gene 15562 [Source:MGI Symbol;Acc:MGI:3783011]	14	-3.80387	0.0480447	0.765111	3.64498	0.90074
ENSMUSG00000021109	Hif1a	hypoxia inducible factor 1, alpha subunit [Source:MGI Symbol;Acc:MGI:106918]	12	1.22743	0.0480728	0.765111	192.525	236.307
ENSMUSG00000105326	6030400A10Rik	RIKEN cDNA 6030400A10 gene [Source:MGI Symbol;Acc:MGI:1924319]	5	-2.59661	0.0480853	0.765111	1.07392	0.4034
ENSMUSG00000037434	Slc30a1	solute carrier family 30 (zinc transporter), member 1 [Source:MGI Symbol;Acc:MGI:1345281]	1	-1.30559	0.0481222	0.765111	9.72967	7.45579
ENSMUSG00000053012	Krcc1	lysine-rich coiled-coil 1 [Source:MGI Symbol;Acc:MGI:1889377]	6	1.27806	0.0482556	0.766384	33.4018	42.6971
ENSMUSG00000102533	Gm37226	predicted gene, 37226 [Source:MGI Symbol;Acc:MGI:5610454]	9	-2.70075	0.0484016	0.767571	0.944517	0.347541
ENSMUSG00000029659	Medag	mesenteric estrogen dependent adipogenesis [Source:MGI Symbol;Acc:MGI:1917967]	5	-1.9703	0.0484371	0.767571	1.13235	0.575144
ENSMUSG00000020818	Mfsd11	major facilitator superfamily domain containing 11 [Source:MGI Symbol;Acc:MGI:1917150]	11	-1.63756	0.048823	0.770721	1.13447	0.692885
ENSMUSG00000029250	Polr2b	polymerase (RNA) II (DNA directed) polypeptide B [Source:MGI Symbol;Acc:MGI:2388280]	5	1.2302	0.0488705	0.770721	14.0106	17.2307
ENSMUSG00000115686	Gm49310	predicted gene, 49310 [Source:MGI Symbol;Acc:MGI:6118813]	14	-2.4956	0.0491347	0.770721	0.882764	0.354607
ENSMUSG00000061615	H2ac4	H2A clustered histone 4 [Source:MGI Symbol;Acc:MGI:2448306]	13	2.16428	0.0491462	0.770721	4.9011	10.6468
ENSMUSG00000108353	Gm45205	predicted gene 45205 [Source:MGI Symbol;Acc:MGI:5753781]	7	-2.82775	0.0491825	0.770721	0.999765	0.357483
ENSMUSG00000022508	Bcl6	B cell leukemia/lymphoma 6 [Source:MGI Symbol;Acc:MGI:107187]	16	1.30122	0.0492017	0.770721	6.15643	8.01236
ENSMUSG00000048332	Lhfp	lipoma HMGIC fusion partner [Source:MGI Symbol;Acc:MGI:1920048]	3	-2.44984	0.0493165	0.770721	0.383681	0.156382
ENSMUSG00000036006	Ripor2	RHO family interacting cell polarization regulator 2 [Source:MGI Symbol;Acc:MGI:2444879]	13	-2.6246	0.0493183	0.770721	0.142421	0.0524502
ENSMUSG00000033233	Trim45	tripartite motif-containing 45 [Source:MGI Symbol;Acc:MGI:1918187]	3	1.91075	0.0493395	0.770721	0.489466	0.932088
ENSMUSG00000094955	Gm3699	predicted gene 3699 [Source:MGI Symbol;Acc:MGI:3781875]	10	2.24524	0.0494196	0.770721	12.8942	29.211
ENSMUSG00000046056	Sbsn	suprabasin [Source:MGI Symbol;Acc:MGI:2446326]	7	-2.86938	0.0494291	0.770721	0.852884	0.300104
ENSMUSG00000115938	Gm17241	predicted gene, 17241 [Source:MGI Symbol;Acc:MGI:4936875]	15	1.64339	0.0497068	0.770721	29.9226	49.1457
ENSMUSG00000002325	Irf9	interferon regulatory factor 9 [Source:MGI Symbol;Acc:MGI:107587]	14	1.59679	0.0499951	0.770721	1.39669	2.23359
ENSMUSG00000032066	Bco2	beta-carotene oxygenase 2 [Source:MGI Symbol;Acc:MGI:2177469]	9	-2.31871	0.050136	0.770721	1.42926	0.620917
ENSMUSG00000116908	Gm49599	predicted gene, 49599 [Source:MGI Symbol;Acc:MGI:6215007]	16	-1.81724	0.0501472	0.770721	1.59121	0.875881
ENSMUSG00000001521	Tulp3	tubby-like protein 3 [Source:MGI Symbol;Acc:MGI:1329045]	6	1.23661	0.0501889	0.770721	6.71455	8.29937
ENSMUSG00000105272	Gm43071	predicted gene 43071 [Source:MGI Symbol;Acc:MGI:5663208]	3	-2.61955	0.0502103	0.770721	0.862774	0.326109
ENSMUSG00000038738	Shank1	SH3 and multiple ankyrin repeat domains 1 [Source:MGI Symbol;Acc:MGI:3613677]	7	-1.22964	0.0502236	0.770721	23.7362	19.3047
ENSMUSG00000028668	Eloa	elongin A [Source:MGI Symbol;Acc:MGI:1351315]	4	1.22693	0.0502642	0.770721	20.9638	25.7363
ENSMUSG00000038412	Higd1a	HIG1 domain family, member 1A [Source:MGI Symbol;Acc:MGI:1930666]	9	1.34005	0.0503041	0.770721	6.14271	8.23332
ENSMUSG00000073702	Rpl31	ribosomal protein L31 [Source:MGI Symbol;Acc:MGI:2149632]	1	1.22485	0.0503094	0.770721	85.2314	104.406
ENSMUSG00000022416	Cacna1i	calcium channel, voltage-dependent, alpha 1I subunit [Source:MGI Symbol;Acc:MGI:2178051]	15	1.53245	0.0503758	0.770721	0.89826	1.377
ENSMUSG00000000056	Narf	nuclear prelamin A recognition factor [Source:MGI Symbol;Acc:MGI:1914858]	11	1.33993	0.0504562	0.770721	7.07256	9.46956
ENSMUSG00000022822	Abcc5	ATP-binding cassette, sub-family C (CFTR/MRP), member 5 [Source:MGI Symbol;Acc:MGI:1351644]	16	-1.31537	0.0504658	0.770721	3.64533	2.77157
ENSMUSG00000034271	Jdp2	Jun dimerization protein 2 [Source:MGI Symbol;Acc:MGI:1932093]	12	1.28027	0.050557	0.770721	20.8852	26.7366
ENSMUSG00000060198	Gm11353	predicted gene 11353 [Source:MGI Symbol;Acc:MGI:3649794]	13	2.4382	0.0506509	0.770721	1.1991	2.93016
ENSMUSG00000042388	Dlgap3	DLG associated protein 3 [Source:MGI Symbol;Acc:MGI:3039563]	4	-2.26295	0.0507114	0.770721	0.631444	0.277592
ENSMUSG00000041261	Car8	carbonic anhydrase 8 [Source:MGI Symbol;Acc:MGI:88253]	4	1.351	0.0507117	0.770721	7.93053	10.7102
ENSMUSG00000024143	Rhoq	ras homolog family member Q [Source:MGI Symbol;Acc:MGI:1931553]	17	-1.23398	0.0507217	0.770721	16.8321	13.6441
ENSMUSG00000106443	Gm42702	predicted gene 42702 [Source:MGI Symbol;Acc:MGI:5662839]	3	-2.17212	0.0508294	0.770721	0.867983	0.397198
ENSMUSG00000029561	Oasl2	2'-5' oligoadenylate synthetase-like 2 [Source:MGI Symbol;Acc:MGI:1344390]	5	2.02096	0.0508835	0.770721	0.44458	0.898747
ENSMUSG00000041679	Lrrc29	leucine rich repeat containing 29 [Source:MGI Symbol;Acc:MGI:2443262]	8	-1.80077	0.0509253	0.770721	1.61883	0.903537
ENSMUSG00000027324	Rpusd2	RNA pseudouridylate synthase domain containing 2 [Source:MGI Symbol;Acc:MGI:1918066]	2	-1.87597	0.0510503	0.770721	3.56852	1.91212
ENSMUSG00000048807	Slc35e4	solute carrier family 35, member E4 [Source:MGI Symbol;Acc:MGI:2144150]	11	-1.68966	0.0511184	0.770721	2.44833	1.44755
ENSMUSG00000038059	Smim3	small integral membrane protein 3 [Source:MGI Symbol;Acc:MGI:1917088]	18	-1.32504	0.0511215	0.770721	5.14044	3.88675
ENSMUSG00000006576	Slc4a3	solute carrier family 4 (anion exchanger), member 3 [Source:MGI Symbol;Acc:MGI:109350]	1	-1.3337	0.0511509	0.770721	3.24198	2.43032
ENSMUSG00000020325	Fstl3	follistatin-like 3 [Source:MGI Symbol;Acc:MGI:1890391]	10	-1.23382	0.0512202	0.770721	27.1236	21.9884
ENSMUSG00000110935	Gm8834	predicted gene 8834 [Source:MGI Symbol;Acc:MGI:3646859]	10	1.84944	0.0513174	0.770721	4.07744	7.56425
ENSMUSG00000032531	Amotl2	angiomotin-like 2 [Source:MGI Symbol;Acc:MGI:1929286]	9	1.25186	0.0513193	0.770721	46.1812	57.8012
ENSMUSG00000031585	Gtf2e2	general transcription factor II E, polypeptide 2 (beta subunit) [Source:MGI Symbol;Acc:MGI:1915403]	8	1.52039	0.0514385	0.770721	4.33914	6.60167
ENSMUSG00000029204	Rhoh	ras homolog family member H [Source:MGI Symbol;Acc:MGI:1921984]	5	1.79074	0.0514441	0.770721	0.46818	0.837484
ENSMUSG00000027792	Bche	butyrylcholinesterase [Source:MGI Symbol;Acc:MGI:894278]	3	1.32478	0.0514469	0.770721	4.6111	6.10784
ENSMUSG00000046807	Lrrc75b	leucine rich repeat containing 75B [Source:MGI Symbol;Acc:MGI:2143657]	10	1.32394	0.0514524	0.770721	11.6156	15.3945
ENSMUSG00000013822	Elof1	ELF1 homolog, elongation factor 1 [Source:MGI Symbol;Acc:MGI:1913376]	9	1.43544	0.0514818	0.770721	7.8189	11.2146
ENSMUSG00000022200	Golph3	golgi phosphoprotein 3 [Source:MGI Symbol;Acc:MGI:1913879]	15	1.20454	0.0515677	0.770721	30.4274	36.649
ENSMUSG00000090086	AI480526	expressed sequence AI480526 [Source:MGI Symbol;Acc:MGI:2140910]	5	-1.57733	0.0515761	0.770721	2.37618	1.50095
ENSMUSG00000027806	Tsc22d2	TSC22 domain family, member 2 [Source:MGI Symbol;Acc:MGI:1919283]	3	-1.25064	0.0515824	0.770721	17.6466	14.108
ENSMUSG00000094344	Gm11942	predicted gene 11942 [Source:MGI Symbol;Acc:MGI:3650608]	4	-4.31341	0.0515975	0.770721	21.6282	4.98692
ENSMUSG00000024258	Polr2d	polymerase (RNA) II (DNA directed) polypeptide D [Source:MGI Symbol;Acc:MGI:1916491]	18	1.48737	0.0516204	0.770721	9.25392	13.7556
ENSMUSG00000026586	Prrx1	paired related homeobox 1 [Source:MGI Symbol;Acc:MGI:97712]	1	1.29888	0.0516678	0.770721	3.61507	4.69721
ENSMUSG00000033998	Kcnk1	potassium channel, subfamily K, member 1 [Source:MGI Symbol;Acc:MGI:109322]	8	1.27348	0.0516803	0.770721	38.3454	48.8283
ENSMUSG00000060594	Layn	layilin [Source:MGI Symbol;Acc:MGI:2685357]	9	-1.81334	0.0517073	0.770721	4.07895	2.24461
ENSMUSG00000026393	Nek7	NIMA (never in mitosis gene a)-related expressed kinase 7 [Source:MGI Symbol;Acc:MGI:1890645]	1	1.21484	0.0517157	0.770721	11.2323	13.6503
ENSMUSG00000055733	Nap1l3	nucleosome assembly protein 1-like 3 [Source:MGI Symbol;Acc:MGI:1859565]	X	1.65636	0.0517611	0.770721	2.15519	3.56345
ENSMUSG00000030111	A2m	alpha-2-macroglobulin [Source:MGI Symbol;Acc:MGI:2449119]	6	-1.9185	0.051786	0.770721	2.7684	1.43789
ENSMUSG00002075463			2	-2.34378	0.0517894	0.770721	26.6003	11.1837
ENSMUSG00000033739	Fkbpl	FK506 binding protein-like [Source:MGI Symbol;Acc:MGI:1932127]	17	2.4865	0.0518421	0.770721	0.823931	2.06896
ENSMUSG00000040936	Ulk4	unc-51-like kinase 4 [Source:MGI Symbol;Acc:MGI:1921622]	9	-1.58029	0.0519212	0.770721	1.10925	0.702152
ENSMUSG00000021665	Hexb	hexosaminidase B [Source:MGI Symbol;Acc:MGI:96074]	13	1.286	0.0519749	0.770721	15.5977	20.0658
ENSMUSG00000025917	Cops5	COP9 signalosome subunit 5 [Source:MGI Symbol;Acc:MGI:1349415]	1	1.31101	0.0520021	0.770721	8.13616	10.6829
ENSMUSG00000071632	2510002D24Rik	RIKEN cDNA 2510002D24 gene [Source:MGI Symbol;Acc:MGI:1919557]	16	-1.6263	0.0520263	0.770721	7.24935	4.4711
ENSMUSG00000104379	Gm37509	predicted gene, 37509 [Source:MGI Symbol;Acc:MGI:5610737]	1	-3.14794	0.052069	0.770721	0.617647	0.195852
ENSMUSG00000030946	Lhpp	phospholysine phosphohistidine inorganic pyrophosphate phosphatase [Source:MGI Symbol;Acc:MGI:1923679]	7	1.47647	0.0520782	0.770721	4.09585	6.04847
ENSMUSG00000110993	Gm47963	predicted gene, 47963 [Source:MGI Symbol;Acc:MGI:6097241]	9	-3.10014	0.0520919	0.770721	0.740129	0.235465
ENSMUSG00000029714	Gigyf1	GRB10 interacting GYF protein 1 [Source:MGI Symbol;Acc:MGI:1888677]	5	-1.27226	0.0521214	0.770721	10.9315	8.5876
ENSMUSG00000037997	Parp11	poly (ADP-ribose) polymerase family, member 11 [Source:MGI Symbol;Acc:MGI:2141505]	6	-1.48437	0.0523387	0.772962	1.93219	1.301
ENSMUSG00000042042	Csgalnact2	chondroitin sulfate N-acetylgalactosaminyltransferase 2 [Source:MGI Symbol;Acc:MGI:1926002]	6	1.55288	0.0524106	0.772962	1.22615	1.9018
ENSMUSG00000030051	Aplf	aprataxin and PNKP like factor [Source:MGI Symbol;Acc:MGI:1919353]	6	1.69502	0.0524343	0.772962	0.816011	1.38683
ENSMUSG00000081487	Gm13689	predicted gene 13689 [Source:MGI Symbol;Acc:MGI:3652061]	2	-3.45747	0.0526889	0.775233	2.97188	0.826045
ENSMUSG00000021091	Serpina3n	serine (or cysteine) peptidase inhibitor, clade A, member 3N [Source:MGI Symbol;Acc:MGI:105045]	12	-1.9154	0.0526962	0.775233	9.44818	4.9248
ENSMUSG00000065353	Snora73b	small nucleolar RNA, H/ACA box 73b [Source:MGI Symbol;Acc:MGI:4360049]	4	2.24643	0.0528638	0.776903	7.67664	17.2188
ENSMUSG00000097061	9330151L19Rik	RIKEN cDNA 9330151L19 gene [Source:MGI Symbol;Acc:MGI:3041168]	12	-1.7999	0.0529455	0.77731	2.20759	1.2308
ENSMUSG00000113680	Gm47405	predicted gene, 47405 [Source:MGI Symbol;Acc:MGI:6096336]	13	-3.68492	0.0531018	0.778809	0.558664	0.147646
ENSMUSG00000021759	Plpp1	phospholipid phosphatase 1 [Source:MGI Symbol;Acc:MGI:108412]	13	1.3409	0.0532036	0.779507	12.9136	17.3074
ENSMUSG00000009575	Cbx5	chromobox 5 [Source:MGI Symbol;Acc:MGI:109372]	15	1.20636	0.0533215	0.780439	17.468	21.0691
ENSMUSG00000087174	5530601H04Rik	RIKEN cDNA 5530601H04 gene [Source:MGI Symbol;Acc:MGI:1918695]	X	-1.51184	0.0535495	0.782579	1.49181	0.986275
ENSMUSG00000031431	Tsc22d3	TSC22 domain family, member 3 [Source:MGI Symbol;Acc:MGI:1196284]	X	1.70713	0.0536321	0.782579	4.43745	7.57986
ENSMUSG00000104586	4921539H07Rik	RIKEN cDNA 4921539H07 gene [Source:MGI Symbol;Acc:MGI:1925506]	3	-2.59103	0.0537533	0.782579	0.431468	0.160983
ENSMUSG00000071655	Ubxn1	UBX domain protein 1 [Source:MGI Symbol;Acc:MGI:1289301]	19	1.25508	0.0538545	0.782579	64.4327	80.8878
ENSMUSG00000028784	Spocd1	SPOC domain containing 1 [Source:MGI Symbol;Acc:MGI:3652045]	4	2.56275	0.0539927	0.782579	1.97238	5.05781
ENSMUSG00000103000	Gm37900	predicted gene, 37900 [Source:MGI Symbol;Acc:MGI:5611128]	4	-2.60447	0.0539946	0.782579	0.453088	0.172062
ENSMUSG00000104184	Gm37818	predicted gene, 37818 [Source:MGI Symbol;Acc:MGI:5611046]	11	-2.39103	0.0540353	0.782579	0.552321	0.229469
ENSMUSG00000102194	Gm38169	predicted gene, 38169 [Source:MGI Symbol;Acc:MGI:5611397]	1	-2.24536	0.0541733	0.782579	1.48577	0.651696
ENSMUSG00000105179	Gm42866	predicted gene 42866 [Source:MGI Symbol;Acc:MGI:5663003]	5	-2.08129	0.0542818	0.782579	1.12941	0.545074
ENSMUSG00000097574	C920006O11Rik	RIKEN cDNA C920006O11 gene [Source:MGI Symbol;Acc:MGI:2443759]	9	-2.00929	0.0542895	0.782579	2.25524	1.12504
ENSMUSG00000014980	Tsen15	tRNA splicing endonuclease subunit 15 [Source:MGI Symbol;Acc:MGI:1913887]	1	1.45249	0.0543161	0.782579	2.76297	4.01128
ENSMUSG00000104383	Gm37553	predicted gene, 37553 [Source:MGI Symbol;Acc:MGI:5610781]	9	-2.73598	0.0544519	0.782579	0.96591	0.346314
ENSMUSG00000027457	Snph	syntaphilin [Source:MGI Symbol;Acc:MGI:2139270]	2	-2.04132	0.0544748	0.782579	0.706483	0.347299
ENSMUSG00000024782	Ak3	adenylate kinase 3 [Source:MGI Symbol;Acc:MGI:1860835]	19	1.27997	0.054496	0.782579	17.5489	22.456
ENSMUSG00000028121	Bcar3	breast cancer anti-estrogen resistance 3 [Source:MGI Symbol;Acc:MGI:1352501]	3	-1.23305	0.0545421	0.782579	24.2831	19.704
ENSMUSG00000033964	Zbtb41	zinc finger and BTB domain containing 41 [Source:MGI Symbol;Acc:MGI:2444487]	1	1.22952	0.0545461	0.782579	10.6294	13.0741
ENSMUSG00000108560	Gm44695	predicted gene 44695 [Source:MGI Symbol;Acc:MGI:5753271]	7	-2.12205	0.0545652	0.782579	1.66217	0.775713
ENSMUSG00000078870	Gm14410	predicted gene 14410 [Source:MGI Symbol;Acc:MGI:3709158]	2	-1.514	0.0545873	0.782579	7.17777	4.75694
ENSMUSG00000103569	Gm38067	predicted gene, 38067 [Source:MGI Symbol;Acc:MGI:5611295]	1	-2.37355	0.0545904	0.782579	2.05064	0.867904
ENSMUSG00000023932	Cdc5l	cell division cycle 5-like (S. pombe) [Source:MGI Symbol;Acc:MGI:1918952]	17	1.23778	0.0546096	0.782579	14.8998	18.4504
ENSMUSG00000005505	Kbtbd4	kelch repeat and BTB (POZ) domain containing 4 [Source:MGI Symbol;Acc:MGI:1914386]	2	1.42193	0.0547818	0.782579	3.5938	5.11289
ENSMUSG00000042854	Trp53rkb	transformation related protein 53 regulating kinase B [Source:MGI Symbol;Acc:MGI:1914050]	2	-2.25507	0.0548162	0.782579	0.678022	0.297888
ENSMUSG00000042308	Setd1a	SET domain containing 1A [Source:MGI Symbol;Acc:MGI:2446244]	7	-1.37553	0.0548381	0.782579	3.39088	2.47011
ENSMUSG00000026289	Atg16l1	autophagy related 16-like 1 (S. cerevisiae) [Source:MGI Symbol;Acc:MGI:1924290]	1	-1.36439	0.0548728	0.782579	2.79232	2.04881
ENSMUSG00000027984	Hadh	hydroxyacyl-Coenzyme A dehydrogenase [Source:MGI Symbol;Acc:MGI:96009]	3	1.29081	0.0548768	0.782579	6.77131	8.75113
ENSMUSG00000038685	Rtel1	regulator of telomere elongation helicase 1 [Source:MGI Symbol;Acc:MGI:2139369]	2	-1.56965	0.0548834	0.782579	1.67751	1.06919
ENSMUSG00000070565	Rasal2	RAS protein activator like 2 [Source:MGI Symbol;Acc:MGI:2443881]	1	1.2134	0.0549721	0.783066	5.20795	6.31831
ENSMUSG00000094936	Rbm4	RNA binding motif protein 4 [Source:MGI Symbol;Acc:MGI:1100865]	19	-1.82856	0.0551063	0.784201	0.88841	0.48376
ENSMUSG00000025503	Taldo1	transaldolase 1 [Source:MGI Symbol;Acc:MGI:1274789]	7	1.23375	0.055342	0.785043	25.189	31.0675
ENSMUSG00000003534	Ddr1	discoidin domain receptor family, member 1 [Source:MGI Symbol;Acc:MGI:99216]	17	1.21095	0.0553723	0.785043	55.3526	67.0305
ENSMUSG00000015829	Tnr	tenascin R [Source:MGI Symbol;Acc:MGI:99516]	1	-1.33537	0.0554526	0.785043	2.33409	1.74977
ENSMUSG00000019214	Chtf18	CTF18, chromosome transmission fidelity factor 18 [Source:MGI Symbol;Acc:MGI:2384887]	17	-2.68351	0.0554693	0.785043	0.404918	0.153075
ENSMUSG00000037243	Zfp692	zinc finger protein 692 [Source:MGI Symbol;Acc:MGI:2144276]	11	-1.63484	0.0554789	0.785043	3.94729	2.41095
ENSMUSG00000022849	Hspbap1	Hspb associated protein 1 [Source:MGI Symbol;Acc:MGI:1913917]	16	-1.68319	0.0555385	0.785043	0.755216	0.4475
ENSMUSG00000009030	Pdcl	phosducin-like [Source:MGI Symbol;Acc:MGI:1914716]	2	1.29079	0.0555668	0.785043	7.6553	9.88543
ENSMUSG00000002997	Prkar2b	protein kinase, cAMP dependent regulatory, type II beta [Source:MGI Symbol;Acc:MGI:97760]	12	1.26216	0.0556927	0.785043	12.3853	15.6286
ENSMUSG00000026234	Ncl	nucleolin [Source:MGI Symbol;Acc:MGI:97286]	1	1.24382	0.0557088	0.785043	88.0317	109.498
ENSMUSG00000075031	H2bc3	H2B clustered histone 3 [Source:MGI Symbol;Acc:MGI:2448377]	13	1.65898	0.0557286	0.785043	8.82746	14.6141
ENSMUSG00000040652	Oaz2	ornithine decarboxylase antizyme 2 [Source:MGI Symbol;Acc:MGI:109492]	9	1.25171	0.0558026	0.785043	14.9459	18.7133
ENSMUSG00000030655	Smg1	SMG1 homolog, phosphatidylinositol 3-kinase-related kinase (C. elegans) [Source:MGI Symbol;Acc:MGI:1919742]	7	-1.22748	0.055882	0.785043	7.58856	6.18325
ENSMUSG00000038115	Ano2	anoctamin 2 [Source:MGI Symbol;Acc:MGI:2387214]	6	-1.81914	0.0559013	0.785043	1.34803	0.735461
ENSMUSG00000021453	Gadd45g	growth arrest and DNA-damage-inducible 45 gamma [Source:MGI Symbol;Acc:MGI:1346325]	13	-1.41418	0.0559353	0.785043	26.7698	18.9496
ENSMUSG00000035778	Ggta1	glycoprotein galactosyltransferase alpha 1, 3 [Source:MGI Symbol;Acc:MGI:95704]	2	1.33002	0.0559951	0.785043	7.0927	9.43653
ENSMUSG00000067847	Romo1	reactive oxygen species modulator 1 [Source:MGI Symbol;Acc:MGI:1914317]	2	1.55806	0.056202	0.785043	8.86075	13.825
ENSMUSG00000026989	Dapl1	death associated protein-like 1 [Source:MGI Symbol;Acc:MGI:1923997]	2	1.22025	0.0562174	0.785043	782.432	954.754
ENSMUSG00000049076	Acap2	ArfGAP with coiled-coil, ankyrin repeat and PH domains 2 [Source:MGI Symbol;Acc:MGI:1925868]	16	1.21719	0.0562598	0.785043	9.86204	12.0017
ENSMUSG00000105293	Gm42843	predicted gene 42843 [Source:MGI Symbol;Acc:MGI:5662980]	3	-2.41677	0.0562871	0.785043	0.921424	0.378984
ENSMUSG00000034818	Celf5	CUGBP, Elav-like family member 5 [Source:MGI Symbol;Acc:MGI:2442333]	10	-2.38169	0.0562965	0.785043	0.308967	0.127499
ENSMUSG00000039168	Dap	death-associated protein [Source:MGI Symbol;Acc:MGI:1918190]	15	1.39779	0.0563998	0.785043	8.32556	11.6404
ENSMUSG00000018830	Myh11	myosin, heavy polypeptide 11, smooth muscle [Source:MGI Symbol;Acc:MGI:102643]	16	-3.71063	0.0564024	0.785043	1.9466	0.521882
ENSMUSG00000019979	Apaf1	apoptotic peptidase activating factor 1 [Source:MGI Symbol;Acc:MGI:1306796]	10	-1.48572	0.0564246	0.785043	1.39442	0.938125
ENSMUSG00000060716	Plekhh1	pleckstrin homology domain containing, family H (with MyTH4 domain) member 1 [Source:MGI Symbol;Acc:MGI:2144989]	12	-1.72014	0.0564763	0.785043	1.40391	0.816604
ENSMUSG00000029361	Nos1	nitric oxide synthase 1, neuronal [Source:MGI Symbol;Acc:MGI:97360]	5	-2.62059	0.0566484	0.786674	0.299268	0.11314
ENSMUSG00000054604	Cggbp1	CGG triplet repeat binding protein 1 [Source:MGI Symbol;Acc:MGI:2146370]	16	1.21814	0.056762	0.786933	14.6792	17.8824
ENSMUSG00000074227	Spint2	serine protease inhibitor, Kunitz type 2 [Source:MGI Symbol;Acc:MGI:1338031]	7	1.24997	0.0567765	0.786933	12.4288	15.5377
ENSMUSG00000040260	Daam2	dishevelled associated activator of morphogenesis 2 [Source:MGI Symbol;Acc:MGI:1923691]	17	-1.23164	0.0569232	0.787146	13.4023	10.8796
ENSMUSG00000071660	Ttc9c	tetratricopeptide repeat domain 9C [Source:MGI Symbol;Acc:MGI:1917637]	19	1.35907	0.0569313	0.787146	4.23291	5.75119
ENSMUSG00000024750	Zfand5	zinc finger, AN1-type domain 5 [Source:MGI Symbol;Acc:MGI:1278334]	19	-1.20973	0.0569662	0.787146	12.4628	10.3044
ENSMUSG00000032258	Lca5	Leber congenital amaurosis 5 (human) [Source:MGI Symbol;Acc:MGI:1923032]	9	1.36764	0.0571721	0.787146	2.72147	3.7186
ENSMUSG00000071649	B3gat3	beta-1,3-glucuronyltransferase 3 (glucuronosyltransferase I) [Source:MGI Symbol;Acc:MGI:1919977]	19	1.27563	0.0572347	0.787146	12.6581	16.1399
ENSMUSG00000003778	Brd8	bromodomain containing 8 [Source:MGI Symbol;Acc:MGI:1925906]	18	-1.21078	0.057245	0.787146	10.7879	8.91377
ENSMUSG00000062981	Mrpl42	mitochondrial ribosomal protein L42 [Source:MGI Symbol;Acc:MGI:1333774]	10	1.28619	0.0573166	0.787146	7.00921	9.01572
ENSMUSG00000027559	Car3	carbonic anhydrase 3 [Source:MGI Symbol;Acc:MGI:88270]	3	-2.48688	0.0573303	0.787146	1.41283	0.55856
ENSMUSG00000056832	Ttc26	tetratricopeptide repeat domain 26 [Source:MGI Symbol;Acc:MGI:2444853]	6	2.07899	0.0573853	0.787146	0.377518	0.788105
ENSMUSG00000073910	Mob3b	MOB kinase activator 3B [Source:MGI Symbol;Acc:MGI:2664539]	4	1.28775	0.0574013	0.787146	5.6632	7.30047
ENSMUSG00000024039	Cbs	cystathionine beta-synthase [Source:MGI Symbol;Acc:MGI:88285]	17	-1.77286	0.0575036	0.787146	1.41027	0.797298
ENSMUSG00000042688	Mapk6	mitogen-activated protein kinase 6 [Source:MGI Symbol;Acc:MGI:1354946]	9	-1.23149	0.0575325	0.787146	10.9932	8.93015
ENSMUSG00000109784	Gm45493	predicted gene 45493 [Source:MGI Symbol;Acc:MGI:5791329]	8	-2.65112	0.0575707	0.787146	0.659141	0.246563
ENSMUSG00000115543	B230362B09Rik	RIKEN cDNA B230362B09 gene [Source:MGI Symbol;Acc:MGI:2442793]	15	-2.80649	0.0576324	0.787146	1.04183	0.376054
ENSMUSG00000103505	Gm38374	predicted gene, 38374 [Source:MGI Symbol;Acc:MGI:5611602]	1	-2.96946	0.0576862	0.787146	0.648225	0.212663
ENSMUSG00000116624	Gm49706	predicted gene, 49706 [Source:MGI Symbol;Acc:MGI:6215169]	16	-2.67595	0.0577837	0.787146	0.611108	0.223943
ENSMUSG00000060703	Cd302	CD302 antigen [Source:MGI Symbol;Acc:MGI:1913455]	2	1.61633	0.0578169	0.787146	3.84623	6.23414
ENSMUSG00000020513	Tubd1	tubulin, delta 1 [Source:MGI Symbol;Acc:MGI:1891826]	11	2.12746	0.057828	0.787146	0.768054	1.63199
ENSMUSG00000103507	Gm38375	predicted gene, 38375 [Source:MGI Symbol;Acc:MGI:5611603]	9	-2.10198	0.0578675	0.787146	2.26112	1.08279
ENSMUSG00000058756	Thra	thyroid hormone receptor alpha [Source:MGI Symbol;Acc:MGI:98742]	11	1.20659	0.0578873	0.787146	45.4282	54.8212
ENSMUSG00000025959	Klf7	Kruppel-like factor 7 (ubiquitous) [Source:MGI Symbol;Acc:MGI:1935151]	1	-1.32998	0.0579727	0.787563	4.27297	3.21819
ENSMUSG00000107118	Gm42986	predicted gene 42986 [Source:MGI Symbol;Acc:MGI:5663123]	5	-2.47564	0.0580747	0.787743	1.10397	0.445979
ENSMUSG00000102324	Gm19721	predicted gene, 19721 [Source:MGI Symbol;Acc:MGI:5011906]	9	-2.03957	0.0581806	0.787743	1.53134	0.749291
ENSMUSG00000014846	Tppp3	tubulin polymerization-promoting protein family member 3 [Source:MGI Symbol;Acc:MGI:1915221]	8	1.24548	0.0582152	0.787743	48.1823	60.0174
ENSMUSG00000028676	Srsf10	serine and arginine-rich splicing factor 10 [Source:MGI Symbol;Acc:MGI:1333805]	4	-1.24162	0.0582359	0.787743	8.84018	7.11761
ENSMUSG00000022037	Clu	clusterin [Source:MGI Symbol;Acc:MGI:88423]	14	1.21577	0.05826	0.787743	1250.22	1519.98
ENSMUSG00000020397	Med7	mediator complex subunit 7 [Source:MGI Symbol;Acc:MGI:1913463]	11	1.38224	0.0584366	0.788852	5.02457	6.94972
ENSMUSG00000097855	A930007I19Rik	RIKEN cDNA A930007I19 gene [Source:MGI Symbol;Acc:MGI:1925029]	19	-2.27531	0.0585543	0.788852	0.547188	0.242735
ENSMUSG00000063320	1190007I07Rik	RIKEN cDNA 1190007I07 gene [Source:MGI Symbol;Acc:MGI:3698433]	10	-2.06364	0.0585882	0.788852	2.18568	1.05769
ENSMUSG00000106205	C230096K16Rik	RIKEN cDNA C230096K16 gene [Source:MGI Symbol;Acc:MGI:3041194]	5	-2.58852	0.0585976	0.788852	0.914707	0.353228
ENSMUSG00000058975	Kcnc1	potassium voltage gated channel, Shaw-related subfamily, member 1 [Source:MGI Symbol;Acc:MGI:96667]	7	-2.26167	0.0587614	0.788852	0.884134	0.390927
ENSMUSG00000022035	Ccdc25	coiled-coil domain containing 25 [Source:MGI Symbol;Acc:MGI:1914429]	14	1.25507	0.0588729	0.788852	7.33234	9.20071
ENSMUSG00000023723	Mrps23	mitochondrial ribosomal protein S23 [Source:MGI Symbol;Acc:MGI:1928138]	11	1.39165	0.0589322	0.788852	9.89696	13.7593
ENSMUSG00000021696	Elovl7	ELOVL family member 7, elongation of long chain fatty acids (yeast) [Source:MGI Symbol;Acc:MGI:1921809]	13	1.77099	0.0589335	0.788852	0.721651	1.27529
ENSMUSG00000030137	Tuba8	tubulin, alpha 8 [Source:MGI Symbol;Acc:MGI:1858225]	6	-1.92991	0.058954	0.788852	1.57989	0.816914
ENSMUSG00000104901	Gm42692	predicted gene 42692 [Source:MGI Symbol;Acc:MGI:5662829]	3	-1.56443	0.0589694	0.788852	5.07281	3.23813
ENSMUSG00000030094	Xpc	xeroderma pigmentosum, complementation group C [Source:MGI Symbol;Acc:MGI:103557]	6	1.27107	0.0589818	0.788852	7.42871	9.45022
ENSMUSG00000047606	Ankrd34c	ankyrin repeat domain 34C [Source:MGI Symbol;Acc:MGI:2685617]	9	1.50949	0.0590006	0.788852	3.04072	4.58423
ENSMUSG00000048027	Rgmb	repulsive guidance molecule family member B [Source:MGI Symbol;Acc:MGI:1916049]	17	1.21893	0.0590944	0.789371	9.90504	12.0742
ENSMUSG00000019880	Rspo3	R-spondin 3 [Source:MGI Symbol;Acc:MGI:1920030]	10	3.39858	0.0593132	0.791559	0.132987	0.462363
ENSMUSG00000060380	C030014I23Rik	RIKEN cDNA C030014I23 gene [Source:MGI Symbol;Acc:MGI:1924631]	9	2.59116	0.0593952	0.791918	0.139563	0.369335
ENSMUSG00000032042	Srpr	signal recognition particle receptor ('docking protein') [Source:MGI Symbol;Acc:MGI:1914648]	9	1.2349	0.0597333	0.794994	22.3012	27.5404
ENSMUSG00000109314	Gm44699	predicted gene 44699 [Source:MGI Symbol;Acc:MGI:5753275]	7	-1.83231	0.0597366	0.794994	0.925755	0.501811
ENSMUSG00000029433	Diablo	diablo, IAP-binding mitochondrial protein [Source:MGI Symbol;Acc:MGI:1913843]	5	-1.90121	0.0597955	0.795043	0.859397	0.45317
ENSMUSG00000031482	Slc25a15	solute carrier family 25 (mitochondrial carrier ornithine transporter), member 15 [Source:MGI Symbol;Acc:MGI:1342274]	8	1.63362	0.0600483	0.795623	0.83624	1.37069
ENSMUSG00000044636	Csrnp2	cysteine-serine-rich nuclear protein 2 [Source:MGI Symbol;Acc:MGI:2386852]	15	-1.60056	0.0600796	0.795623	1.95622	1.22613
ENSMUSG00000044254	Pcsk9	proprotein convertase subtilisin/kexin type 9 [Source:MGI Symbol;Acc:MGI:2140260]	4	2.26785	0.0600957	0.795623	0.356056	0.813054
ENSMUSG00000001802	Lrp3	low density lipoprotein receptor-related protein 3 [Source:MGI Symbol;Acc:MGI:3584516]	7	-1.3317	0.0601465	0.795623	5.0806	3.81768
ENSMUSG00000108238	Gm43984	predicted gene, 43984 [Source:MGI Symbol;Acc:MGI:5690376]	6	-1.7658	0.0602274	0.795623	2.81345	1.59813
ENSMUSG00000051177	Plcb1	phospholipase C, beta 1 [Source:MGI Symbol;Acc:MGI:97613]	2	-2.14659	0.0602416	0.795623	0.261415	0.12154
ENSMUSG00000031169	Porcn	porcupine O-acyltransferase [Source:MGI Symbol;Acc:MGI:1890212]	X	-1.47398	0.0602483	0.795623	5.99331	4.0572
ENSMUSG00000039512	Uhrf1bp1	UHRF1 (ICBP90) binding protein 1 [Source:MGI Symbol;Acc:MGI:3041238]	17	-1.29704	0.0603324	0.795623	4.07581	3.1434
ENSMUSG00000085438	Oip5os1	Opa interacting protein 5, opposite strand 1 [Source:MGI Symbol;Acc:MGI:1913852]	2	1.20627	0.0603373	0.795623	14.5652	17.5736
ENSMUSG00000035378	Shq1	SHQ1 homolog (S. cerevisiae) [Source:MGI Symbol;Acc:MGI:1919421]	6	-1.77084	0.0606905	0.798407	0.808685	0.453918
ENSMUSG00000027525	Phactr3	phosphatase and actin regulator 3 [Source:MGI Symbol;Acc:MGI:1921439]	2	-2.28453	0.0608127	0.798407	0.419747	0.179807
ENSMUSG00000074030	Exoc8	exocyst complex component 8 [Source:MGI Symbol;Acc:MGI:2142527]	8	1.34837	0.060829	0.798407	4.10589	5.53371
ENSMUSG00000043903	Zfp469	zinc finger protein 469 [Source:MGI Symbol;Acc:MGI:2684868]	8	1.73809	0.0608543	0.798407	0.288628	0.501501
ENSMUSG00000096696	Zfp960	zinc finger protein 960 [Source:MGI Symbol;Acc:MGI:3052731]	17	-2.1313	0.0608901	0.798407	0.960809	0.449021
ENSMUSG00000034729	Mrps10	mitochondrial ribosomal protein S10 [Source:MGI Symbol;Acc:MGI:1928139]	17	-1.37448	0.0609667	0.798407	2.62837	1.91552
ENSMUSG00000102786	Gm38252	predicted gene, 38252 [Source:MGI Symbol;Acc:MGI:5611480]	3	-3.23008	0.0609765	0.798407	0.726855	0.220858
ENSMUSG00000028847	Trappc3	trafficking protein particle complex 3 [Source:MGI Symbol;Acc:MGI:1351486]	4	1.34113	0.0611191	0.798407	10.6369	14.2868
ENSMUSG00000030616	Sytl2	synaptotagmin-like 2 [Source:MGI Symbol;Acc:MGI:1933366]	7	-2.47389	0.0612103	0.798407	0.259655	0.103163
ENSMUSG00000104436	Gm37423	predicted gene, 37423 [Source:MGI Symbol;Acc:MGI:5610651]	1	-2.53953	0.0612225	0.798407	0.419921	0.166529
ENSMUSG00000053604	Rpia	ribose 5-phosphate isomerase A [Source:MGI Symbol;Acc:MGI:103254]	6	1.7645	0.0612695	0.798407	0.500547	0.88494
ENSMUSG00000006356	Crip2	cysteine rich protein 2 [Source:MGI Symbol;Acc:MGI:1915587]	12	1.34087	0.0612698	0.798407	10.2996	13.8078
ENSMUSG00000031320	Rps4x	ribosomal protein S4, X-linked [Source:MGI Symbol;Acc:MGI:98158]	X	1.20396	0.0612772	0.798407	156.984	189.008
ENSMUSG00000106706	C530043K16Rik	RIKEN cDNA C530043K16 gene [Source:MGI Symbol;Acc:MGI:2444587]	5	-2.28179	0.061369	0.798407	0.562767	0.246405
ENSMUSG00000032940	Rbm11	RNA binding motif protein 11 [Source:MGI Symbol;Acc:MGI:2447622]	16	-2.6117	0.0614157	0.798407	1.08219	0.415414
ENSMUSG00000032085	Tagln	transgelin [Source:MGI Symbol;Acc:MGI:106012]	9	-2.72721	0.0614373	0.798407	1.09566	0.399136
ENSMUSG00000086600	C030005K06Rik	RIKEN cDNA C030005K06 gene [Source:MGI Symbol;Acc:MGI:1925945]	18	3.03963	0.0615319	0.798739	0.234976	0.720022
ENSMUSG00000037572	Wdhd1	WD repeat and HMG-box DNA binding protein 1 [Source:MGI Symbol;Acc:MGI:2443514]	14	-2.03073	0.0616929	0.798739	0.471131	0.232968
ENSMUSG00000047281	Sfn	stratifin [Source:MGI Symbol;Acc:MGI:1891831]	4	-1.60757	0.0617142	0.798739	7.18621	4.48849
ENSMUSG00000108005	Gm44435	predicted gene, 44435 [Source:MGI Symbol;Acc:MGI:5690827]	6	-2.13453	0.061742	0.798739	0.988112	0.464701
ENSMUSG00000038069	Cdkn2aip	CDKN2A interacting protein [Source:MGI Symbol;Acc:MGI:1918175]	8	1.34334	0.0617852	0.798739	4.18457	5.62474
ENSMUSG00000020477	Mrps24	mitochondrial ribosomal protein S24 [Source:MGI Symbol;Acc:MGI:1928142]	11	1.3846	0.061825	0.798739	11.2393	15.5739
ENSMUSG00000004455	Ppp1cc	protein phosphatase 1 catalytic subunit gamma [Source:MGI Symbol;Acc:MGI:104872]	5	-1.2944	0.0619256	0.798739	12.0584	9.30508
ENSMUSG00000017390	Aldoc	aldolase C, fructose-bisphosphate [Source:MGI Symbol;Acc:MGI:101863]	11	1.21229	0.0619318	0.798739	434.434	526.662
ENSMUSG00000116858	Gm49797	predicted gene, 49797 [Source:MGI Symbol;Acc:MGI:6215329]	17	-1.88674	0.06221	0.798739	1.08442	0.576307
ENSMUSG00000019558	Slc6a8	solute carrier family 6 (neurotransmitter transporter, creatine), member 8 [Source:MGI Symbol;Acc:MGI:2147834]	X	-1.86664	0.0622631	0.798739	2.72997	1.46126
ENSMUSG00000028583	Pdpn	podoplanin [Source:MGI Symbol;Acc:MGI:103098]	4	1.2203	0.0622633	0.798739	112.814	137.638
ENSMUSG00000107240	Gm43231	predicted gene 43231 [Source:MGI Symbol;Acc:MGI:5663368]	5	-2.73992	0.0622992	0.798739	1.6162	0.590068
ENSMUSG00000021573	Tppp	tubulin polymerization promoting protein [Source:MGI Symbol;Acc:MGI:1920198]	13	-2.31812	0.0623071	0.798739	0.696295	0.29546
ENSMUSG00000026946	Nmi	N-myc (and STAT) interactor [Source:MGI Symbol;Acc:MGI:1928368]	2	1.39588	0.0623805	0.798739	6.27323	8.76228
ENSMUSG00000042104	Uggt2	UDP-glucose glycoprotein glucosyltransferase 2 [Source:MGI Symbol;Acc:MGI:1913685]	14	-1.30989	0.0624357	0.798739	2.81465	2.151
ENSMUSG00000090965	Gm17203	predicted gene 17203 [Source:MGI Symbol;Acc:MGI:4938030]	19	-2.38909	0.0624357	0.798739	0.511889	0.213273
ENSMUSG00000023953	Polh	polymerase (DNA directed), eta (RAD 30 related) [Source:MGI Symbol;Acc:MGI:1891457]	17	1.61762	0.0624776	0.798739	0.768781	1.2423
ENSMUSG00000041571	Selenow	selenoprotein W [Source:MGI Symbol;Acc:MGI:1100878]	7	1.2116	0.0625281	0.798739	145.347	176.118
ENSMUSG00000026674	Ddr2	discoidin domain receptor family, member 2 [Source:MGI Symbol;Acc:MGI:1345277]	1	1.19636	0.0625457	0.798739	15.5118	18.5569
ENSMUSG00000053332	Gas5	growth arrest specific 5 [Source:MGI Symbol;Acc:MGI:95659]	1	1.23805	0.0625743	0.798739	19.9322	24.6712
ENSMUSG00000002190	Clgn	calmegin [Source:MGI Symbol;Acc:MGI:107472]	8	2.45272	0.0627935	0.799734	0.138418	0.345626
ENSMUSG00000053617	Sh3pxd2a	SH3 and PX domains 2A [Source:MGI Symbol;Acc:MGI:1298393]	19	-1.31346	0.0628487	0.799734	3.71515	2.83311
ENSMUSG00000024597	Slc12a2	solute carrier family 12, member 2 [Source:MGI Symbol;Acc:MGI:101924]	18	1.20658	0.0628762	0.799734	30.0593	36.2656
ENSMUSG00000039163	Cmc1	COX assembly mitochondrial protein 1 [Source:MGI Symbol;Acc:MGI:1915149]	9	1.51812	0.0629185	0.799734	6.34028	9.62582
ENSMUSG00000042331	Specc1	sperm antigen with calponin homology and coiled-coil domains 1 [Source:MGI Symbol;Acc:MGI:2442356]	11	1.2313	0.0629304	0.799734	18.3248	22.5611
ENSMUSG00000041193	Pla2g5	phospholipase A2, group V [Source:MGI Symbol;Acc:MGI:101899]	4	1.20202	0.0631749	0.800943	38.1548	45.8562
ENSMUSG00000104983	Gm42763	predicted gene 42763 [Source:MGI Symbol;Acc:MGI:5662900]	9	-2.50448	0.0631915	0.800943	0.729279	0.289343
ENSMUSG00000022855	Senp2	SUMO/sentrin specific peptidase 2 [Source:MGI Symbol;Acc:MGI:1923076]	16	-1.21895	0.0631927	0.800943	14.1461	11.6069
ENSMUSG00000064080	Fbln2	fibulin 2 [Source:MGI Symbol;Acc:MGI:95488]	6	-3.42269	0.0634556	0.803566	0.923452	0.268637
ENSMUSG00000005580	Adcy9	adenylate cyclase 9 [Source:MGI Symbol;Acc:MGI:108450]	16	-1.27616	0.0635943	0.803986	6.83409	5.35463
ENSMUSG00000017715	Pgs1	phosphatidylglycerophosphate synthase 1 [Source:MGI Symbol;Acc:MGI:1921701]	11	-1.33028	0.0636006	0.803986	6.55902	4.9282
ENSMUSG00000072774	Zfp951	zinc finger protein 951 [Source:MGI Symbol;Acc:MGI:2441896]	5	-1.62656	0.0637558	0.804859	1.98105	1.21925
ENSMUSG00000033253	Szt2	SZT2 subunit of KICSTOR complex [Source:MGI Symbol;Acc:MGI:3033336]	4	-1.24381	0.0637817	0.804859	4.78954	3.85164
ENSMUSG00000062794	Zfp599	zinc finger protein 599 [Source:MGI Symbol;Acc:MGI:2679006]	9	-2.68438	0.0639298	0.80602	0.411656	0.147437
ENSMUSG00000089281	Scarna6	small Cajal body-specific RNA 6 [Source:MGI Symbol;Acc:MGI:3819487]	1	1.90595	0.0639939	0.806044	10.3203	19.736
ENSMUSG00000100158	Gm28119	predicted gene 28119 [Source:MGI Symbol;Acc:MGI:5578825]	9	-2.41224	0.0641237	0.806044	5.82686	2.44609
ENSMUSG00000056481	Cd248	CD248 antigen, endosialin [Source:MGI Symbol;Acc:MGI:1917695]	19	-2.93465	0.0641642	0.806044	0.67711	0.232478
ENSMUSG00000060019	Gm10073	predicted pseudogene 10073 [Source:MGI Symbol;Acc:MGI:3641908]	8	-5.63474	0.0641861	0.806044	11.8391	2.07847
ENSMUSG00000032101	Ddx25	DEAD box helicase 25 [Source:MGI Symbol;Acc:MGI:1353582]	9	-2.39037	0.0642646	0.806044	0.237406	0.0976702
ENSMUSG00000026335	Pam	peptidylglycine alpha-amidating monooxygenase [Source:MGI Symbol;Acc:MGI:97475]	1	1.2065	0.0643095	0.806044	58.6839	70.7999
ENSMUSG00000078566	Bnip3	BCL2/adenovirus E1B interacting protein 3 [Source:MGI Symbol;Acc:MGI:109326]	7	1.2623	0.0643242	0.806044	24.7313	31.2175
ENSMUSG00000022489	Pde1b	phosphodiesterase 1B, Ca2+-calmodulin dependent [Source:MGI Symbol;Acc:MGI:97523]	15	1.20156	0.0645935	0.808589	14.2922	17.17
ENSMUSG00000051323	Pcdh19	protocadherin 19 [Source:MGI Symbol;Acc:MGI:2685563]	X	1.31271	0.0646732	0.808589	3.44264	4.51886
ENSMUSG00000036435	Exoc1	exocyst complex component 1 [Source:MGI Symbol;Acc:MGI:2445020]	5	-1.29741	0.0646961	0.808589	2.98665	2.29822
ENSMUSG00000110159	Gm45501	predicted gene 45501 [Source:MGI Symbol;Acc:MGI:5791337]	7	-2.45331	0.0648481	0.808798	0.945609	0.381865
ENSMUSG00000113621	2900060N12Rik	RIKEN cDNA 2900060N12 gene [Source:MGI Symbol;Acc:MGI:1920281]	12	-2.49792	0.0648596	0.808798	0.711752	0.283042
ENSMUSG00000025138	Sirt7	sirtuin 7 [Source:MGI Symbol;Acc:MGI:2385849]	11	-1.53384	0.0648941	0.808798	1.86318	1.21214
ENSMUSG00000030330	Ing4	inhibitor of growth family, member 4 [Source:MGI Symbol;Acc:MGI:107307]	6	-2.11403	0.0649379	0.808798	0.705146	0.333126
ENSMUSG00000111356	Rpl32l	ribosomal protein L32-like [Source:MGI Symbol;Acc:MGI:3644747]	10	-2.08674	0.0650435	0.809077	6.93219	3.31486
ENSMUSG00000058301	Upf1	UPF1 regulator of nonsense transcripts homolog (yeast) [Source:MGI Symbol;Acc:MGI:107995]	8	-1.21143	0.0650729	0.809077	17.9766	14.8425
ENSMUSG00000036875	Dna2	DNA replication helicase/nuclease 2 [Source:MGI Symbol;Acc:MGI:2443732]	10	-2.11165	0.0652126	0.810113	0.760801	0.360986
ENSMUSG00000034245	Hdac11	histone deacetylase 11 [Source:MGI Symbol;Acc:MGI:2385252]	6	1.25836	0.0654046	0.811796	10.3362	13.018
ENSMUSG00000006301	Tmbim1	transmembrane BAX inhibitor motif containing 1 [Source:MGI Symbol;Acc:MGI:1916910]	1	-1.32193	0.0655589	0.81301	3.03271	2.2923
ENSMUSG00000070283	Ndufaf3	NADH:ubiquinone oxidoreductase complex assembly factor 3 [Source:MGI Symbol;Acc:MGI:1913956]	9	1.54429	0.0656545	0.813493	3.71867	5.7526
ENSMUSG00000029381	Shroom3	shroom family member 3 [Source:MGI Symbol;Acc:MGI:1351655]	5	-1.33283	0.0658079	0.81449	5.06831	3.80324
ENSMUSG00000067365	Tmem128	transmembrane protein 128 [Source:MGI Symbol;Acc:MGI:1913559]	5	-1.56168	0.0658483	0.81449	2.8862	1.84487
ENSMUSG00000035575	Utp6	UTP6 small subunit processome component [Source:MGI Symbol;Acc:MGI:2445193]	11	1.25586	0.0659851	0.81548	8.378	10.5185
ENSMUSG00000021185	Dglucy	D-glutamate cyclase [Source:MGI Symbol;Acc:MGI:2444813]	12	1.65769	0.0661097	0.815976	1.09135	1.80429
ENSMUSG00000020085	Aifm2	apoptosis-inducing factor, mitochondrion-associated 2 [Source:MGI Symbol;Acc:MGI:1918611]	10	1.37616	0.0661387	0.815976	3.40629	4.68543
ENSMUSG00000039183	Nubp2	nucleotide binding protein 2 [Source:MGI Symbol;Acc:MGI:1347072]	17	1.43849	0.0663721	0.817968	6.10513	8.80319
ENSMUSG00000061991	H2ac10	H2A clustered histone 10 [Source:MGI Symbol;Acc:MGI:2448309]	13	-1.60942	0.0664141	0.817968	26.5254	16.4183
ENSMUSG00000110353	Gm33543	predicted gene, 33543 [Source:MGI Symbol;Acc:MGI:5592702]	10	2.31854	0.066584	0.818292	0.558962	1.31321
ENSMUSG00000038840	Birc7	baculoviral IAP repeat-containing 7 (livin) [Source:MGI Symbol;Acc:MGI:2676458]	2	1.9598	0.0667015	0.818292	1.57044	3.08342
ENSMUSG00000097164	Cep83os	centrosomal protein 83, opposite strand [Source:MGI Symbol;Acc:MGI:1914973]	10	1.56293	0.0667034	0.818292	0.764334	1.19435
ENSMUSG00000102428	Pcdhga12	protocadherin gamma subfamily A, 12 [Source:MGI Symbol;Acc:MGI:1935229]	18	-1.65429	0.0667057	0.818292	1.65902	1.00298
ENSMUSG00000054793	Cadm4	cell adhesion molecule 4 [Source:MGI Symbol;Acc:MGI:2449088]	7	1.78167	0.066725	0.818292	1.4607	2.60632
ENSMUSG00000004096	Cwc15	CWC15 spliceosome-associated protein [Source:MGI Symbol;Acc:MGI:1913320]	9	1.24585	0.0668124	0.818562	44.6849	55.6659
ENSMUSG00000034243	Golgb1	golgi autoantigen, golgin subfamily b, macrogolgin 1 [Source:MGI Symbol;Acc:MGI:1099447]	16	1.20974	0.0668609	0.818562	31.5619	38.1778
ENSMUSG00000007812	Zfp655	zinc finger protein 655 [Source:MGI Symbol;Acc:MGI:1919861]	5	-1.27751	0.0671308	0.82063	12.2556	9.58652
ENSMUSG00000002603	Tgfb1	transforming growth factor, beta 1 [Source:MGI Symbol;Acc:MGI:98725]	7	-1.34231	0.0671864	0.82063	12.2131	9.09923
ENSMUSG00000071451	Psmg4	proteasome (prosome, macropain) assembly chaperone 4 [Source:MGI Symbol;Acc:MGI:1916916]	13	1.42652	0.0672332	0.82063	19.3018	27.4969
ENSMUSG00000006134	Crkl	v-crk avian sarcoma virus CT10 oncogene homolog-like [Source:MGI Symbol;Acc:MGI:104686]	16	-1.2601	0.0672985	0.82063	8.69432	6.90116
ENSMUSG00000108267	Gm44190	predicted gene, 44190 [Source:MGI Symbol;Acc:MGI:5690582]	6	-2.1856	0.0673153	0.82063	1.89731	0.870232
ENSMUSG00000034949	Zfr2	zinc finger RNA binding protein 2 [Source:MGI Symbol;Acc:MGI:2143792]	10	-1.36714	0.0673792	0.820713	3.21262	2.34875
ENSMUSG00000053565	Eif3k	eukaryotic translation initiation factor 3, subunit K [Source:MGI Symbol;Acc:MGI:1921080]	7	1.23812	0.0675014	0.821505	16.092	19.9203
ENSMUSG00000020448	Rnf185	ring finger protein 185 [Source:MGI Symbol;Acc:MGI:1922078]	11	1.31762	0.0676199	0.822251	6.95661	9.17262
ENSMUSG00000063142	Kcnma1	potassium large conductance calcium-activated channel, subfamily M, alpha member 1 [Source:MGI Symbol;Acc:MGI:99923]	14	-1.51315	0.067758	0.822702	0.795164	0.524502
ENSMUSG00000104406	Gm38014	predicted gene, 38014 [Source:MGI Symbol;Acc:MGI:5611242]	2	-2.48143	0.0678662	0.822702	0.47342	0.185659
ENSMUSG00000032527	Pccb	propionyl Coenzyme A carboxylase, beta polypeptide [Source:MGI Symbol;Acc:MGI:1914154]	9	1.28247	0.0680584	0.822702	11.483	14.7354
ENSMUSG00000039985	Sinhcaf	SIN3-HDAC complex associated factor [Source:MGI Symbol;Acc:MGI:1929091]	6	1.22357	0.0681612	0.822702	15.1225	18.5157
ENSMUSG00000027573	Gid8	GID complex subunit 8 [Source:MGI Symbol;Acc:MGI:1923675]	2	1.27111	0.0681886	0.822702	12.1625	15.4694
ENSMUSG00000030282	Cmas	cytidine monophospho-N-acetylneuraminic acid synthetase [Source:MGI Symbol;Acc:MGI:1337124]	6	-1.49696	0.0682147	0.822702	2.37534	1.58439
ENSMUSG00000097583	6430590A07Rik	RIKEN cDNA 6430590A07 gene [Source:MGI Symbol;Acc:MGI:3648839]	3	-1.81181	0.0682346	0.822702	1.2198	0.6725
ENSMUSG00000114172	Gm36298	predicted gene, 36298 [Source:MGI Symbol;Acc:MGI:5595457]	13	2.13189	0.0683121	0.822702	0.850902	1.80934
ENSMUSG00000113869	Gm48869	predicted gene, 48869 [Source:MGI Symbol;Acc:MGI:6098615]	13	-2.68747	0.0683456	0.822702	1.78972	0.647078
ENSMUSG00000026709	Dars2	aspartyl-tRNA synthetase 2 (mitochondrial) [Source:MGI Symbol;Acc:MGI:2442510]	1	1.78094	0.0684206	0.822702	0.576022	1.02987
ENSMUSG00000034908	Sidt2	SID1 transmembrane family, member 2 [Source:MGI Symbol;Acc:MGI:2446134]	9	-1.37794	0.0684259	0.822702	5.5776	4.0565
ENSMUSG00000022389	Tef	thyrotroph embryonic factor [Source:MGI Symbol;Acc:MGI:98663]	15	1.19655	0.0684376	0.822702	22.594	27.0363
ENSMUSG00000028696	Ipp	IAP promoted placental gene [Source:MGI Symbol;Acc:MGI:96581]	4	1.46515	0.0684479	0.822702	4.7649	6.98703
ENSMUSG00000008734	Gprc5b	G protein-coupled receptor, family C, group 5, member B [Source:MGI Symbol;Acc:MGI:1927596]	7	1.20023	0.0684767	0.822702	129.303	155.198
ENSMUSG00000028862	Map3k6	mitogen-activated protein kinase kinase kinase 6 [Source:MGI Symbol;Acc:MGI:1855691]	4	-1.95995	0.0685156	0.822702	0.870696	0.44484
ENSMUSG00000017929	B4galt5	UDP-Gal:betaGlcNAc beta 1,4-galactosyltransferase, polypeptide 5 [Source:MGI Symbol;Acc:MGI:1927169]	2	-1.47646	0.0687357	0.824657	3.59537	2.43931
ENSMUSG00000062729	Ppox	protoporphyrinogen oxidase [Source:MGI Symbol;Acc:MGI:104968]	1	-1.42366	0.068795	0.82468	3.64586	2.56474
ENSMUSG00000023921	Mmut	methylmalonyl-Coenzyme A mutase [Source:MGI Symbol;Acc:MGI:97239]	17	1.31338	0.0689257	0.824984	5.89016	7.72729
ENSMUSG00000000753	Serpinf1	serine (or cysteine) peptidase inhibitor, clade F, member 1 [Source:MGI Symbol;Acc:MGI:108080]	11	-5.99399	0.0690142	0.824984	5.77053	0.956279
ENSMUSG00000053706	B430305J03Rik	RIKEN cDNA B430305J03 gene [Source:MGI Symbol;Acc:MGI:3697707]	3	-2.31566	0.069106	0.824984	0.766744	0.326355
ENSMUSG00000021948	Prkcd	protein kinase C, delta [Source:MGI Symbol;Acc:MGI:97598]	14	-1.28916	0.0691096	0.824984	6.5997	5.1252
ENSMUSG00000035828	Pim3	proviral integration site 3 [Source:MGI Symbol;Acc:MGI:1355297]	15	1.28633	0.0692032	0.824984	14.3758	18.5158
ENSMUSG00000024622	Hmgxb3	HMG box domain containing 3 [Source:MGI Symbol;Acc:MGI:2441817]	18	1.24372	0.0692734	0.824984	3.8727	4.81711
ENSMUSG00000106636	Gm43813	predicted gene 43813 [Source:MGI Symbol;Acc:MGI:5663950]	5	-2.77149	0.0693328	0.824984	0.447029	0.162748
ENSMUSG00000087049	Bach2it1	BTB and CNC homology 2, intronic transcript 1 [Source:MGI Symbol;Acc:MGI:3651084]	4	-2.66559	0.0694924	0.824984	5.35858	2.01172
ENSMUSG00000045967	Gpr158	G protein-coupled receptor 158 [Source:MGI Symbol;Acc:MGI:2441697]	2	-2.59846	0.0695154	0.824984	0.285262	0.107946
ENSMUSG00000021619	Atg10	autophagy related 10 [Source:MGI Symbol;Acc:MGI:1914045]	13	1.54408	0.0695315	0.824984	3.99994	6.18258
ENSMUSG00000022836	Mylk	myosin, light polypeptide kinase [Source:MGI Symbol;Acc:MGI:894806]	16	-1.48423	0.0695317	0.824984	1.4923	1.0039
ENSMUSG00000043535	Setx	senataxin [Source:MGI Symbol;Acc:MGI:2443480]	2	1.20225	0.0695494	0.824984	7.3845	8.87683
ENSMUSG00000032766	Gng11	guanine nucleotide binding protein (G protein), gamma 11 [Source:MGI Symbol;Acc:MGI:1913316]	6	1.53829	0.0695666	0.824984	7.211	11.1192
ENSMUSG00000040112	Mrps35	mitochondrial ribosomal protein S35 [Source:MGI Symbol;Acc:MGI:2385255]	6	1.36231	0.0697097	0.825133	1.6367	2.23221
ENSMUSG00000023963	Cyp39a1	cytochrome P450, family 39, subfamily a, polypeptide 1 [Source:MGI Symbol;Acc:MGI:1927096]	17	1.31017	0.0698451	0.825133	6.49316	8.50163
ENSMUSG00000074813	Morrbid	myeloid RNA regulator of BCL2L11 induced cell death [Source:MGI Symbol;Acc:MGI:3652191]	2	-2.56358	0.0698614	0.825133	0.0972037	0.0381614
ENSMUSG00000033022	Cdo1	cysteine dioxygenase 1, cytosolic [Source:MGI Symbol;Acc:MGI:105925]	18	1.96943	0.069887	0.825133	1.18004	2.31976
ENSMUSG00000040966	Slc22a2	solute carrier family 22 (organic cation transporter), member 2 [Source:MGI Symbol;Acc:MGI:1335072]	17	2.13892	0.0698957	0.825133	0.377495	0.813254
ENSMUSG00000027200	Sema6d	sema domain, transmembrane domain (TM), and cytoplasmic domain, (semaphorin) 6D [Source:MGI Symbol;Acc:MGI:2387661]	2	-1.5963	0.0699724	0.825133	0.685218	0.42887
ENSMUSG00000074364	Ehd2	EH-domain containing 2 [Source:MGI Symbol;Acc:MGI:2154274]	7	1.28482	0.0699811	0.825133	19.4719	25.0078
ENSMUSG00000029918	Mrps33	mitochondrial ribosomal protein S33 [Source:MGI Symbol;Acc:MGI:1338046]	6	1.3784	0.0701401	0.826331	8.1862	11.2737
ENSMUSG00000050730	Arhgap42	Rho GTPase activating protein 42 [Source:MGI Symbol;Acc:MGI:1918794]	9	-1.40028	0.0703106	0.827662	2.8471	2.0375
ENSMUSG00000037375	Hhat	hedgehog acyltransferase [Source:MGI Symbol;Acc:MGI:2444681]	1	-2.13439	0.07055	0.829799	0.298618	0.140202
ENSMUSG00000040033	Stat2	signal transducer and activator of transcription 2 [Source:MGI Symbol;Acc:MGI:103039]	10	-1.62053	0.0707402	0.830915	1.88965	1.16304
ENSMUSG00000081406	Rps6-ps4	ribosomal protein S6, pseudogene 4 [Source:MGI Symbol;Acc:MGI:3650907]	2	2.18796	0.0707604	0.830915	1.5423	3.39202
ENSMUSG00000020115	Tbk1	TANK-binding kinase 1 [Source:MGI Symbol;Acc:MGI:1929658]	10	-1.31165	0.0708906	0.831009	9.11481	6.95173
ENSMUSG00000030042	Pole4	polymerase (DNA-directed), epsilon 4 (p12 subunit) [Source:MGI Symbol;Acc:MGI:1914229]	6	1.34191	0.070917	0.831009	6.63184	8.89314
ENSMUSG00000068523	Gng5	guanine nucleotide binding protein (G protein), gamma 5 [Source:MGI Symbol;Acc:MGI:109164]	3	1.22258	0.0709419	0.831009	21.6045	26.4098
ENSMUSG00000105985	Gm42993	predicted gene 42993 [Source:MGI Symbol;Acc:MGI:5663130]	5	-1.62942	0.0712017	0.833096	0.900752	0.552979
ENSMUSG00000000197	Nalcn	sodium leak channel, non-selective [Source:MGI Symbol;Acc:MGI:2444306]	14	-1.94992	0.071236	0.833096	0.272192	0.139273
ENSMUSG00000031146	Plp2	proteolipid protein 2 [Source:MGI Symbol;Acc:MGI:1298382]	X	-1.31645	0.0712993	0.833158	18.5778	14.0995
ENSMUSG00000103780	Gm37524	predicted gene, 37524 [Source:MGI Symbol;Acc:MGI:5610752]	1	-2.26229	0.0714926	0.834738	1.68547	0.741475
ENSMUSG00000027160	Ccdc34	coiled-coil domain containing 34 [Source:MGI Symbol;Acc:MGI:1915451]	2	1.30049	0.0716277	0.834868	3.41087	4.43198
ENSMUSG00000024188	Luc7l	Luc7-like [Source:MGI Symbol;Acc:MGI:1914228]	17	-1.21888	0.0716286	0.834868	12.1373	9.96223
ENSMUSG00000037815	Ctnna1	catenin (cadherin associated protein), alpha 1 [Source:MGI Symbol;Acc:MGI:88274]	18	1.19817	0.0716991	0.834868	45.9166	55.0109
ENSMUSG00000020937	Plcd3	phospholipase C, delta 3 [Source:MGI Symbol;Acc:MGI:107451]	11	-1.30641	0.0717997	0.834868	17.6313	13.5106
ENSMUSG00000040296	Ddx58	DEAD/H box helicase 58 [Source:MGI Symbol;Acc:MGI:2442858]	4	1.52716	0.0718378	0.834868	1.45018	2.21019
ENSMUSG00000073627	C130036L24Rik	RIKEN cDNA C130036L24 gene [Source:MGI Symbol;Acc:MGI:2441877]	1	-2.36485	0.0718522	0.834868	0.298177	0.126978
ENSMUSG00000103081	Pcdhgb8	protocadherin gamma subfamily B, 8 [Source:MGI Symbol;Acc:MGI:1935200]	18	-1.77875	0.0719954	0.835161	1.43324	0.809873
ENSMUSG00000054823	Nsd3	nuclear receptor binding SET domain protein 3 [Source:MGI Symbol;Acc:MGI:2142581]	8	-1.20719	0.0720129	0.835161	5.2479	4.3471
ENSMUSG00000074182	Znhit6	zinc finger, HIT type 6 [Source:MGI Symbol;Acc:MGI:1916996]	3	1.26321	0.0722289	0.835161	10.6439	13.4486
ENSMUSG00000042254	Cilp	cartilage intermediate layer protein, nucleotide pyrophosphohydrolase [Source:MGI Symbol;Acc:MGI:2444507]	9	1.26957	0.0722906	0.835161	20.5597	26.0992
ENSMUSG00000027714	Exosc9	exosome component 9 [Source:MGI Symbol;Acc:MGI:1355319]	3	1.30806	0.0723159	0.835161	5.74659	7.52582
ENSMUSG00000021365	Nedd9	neural precursor cell expressed, developmentally down-regulated gene 9 [Source:MGI Symbol;Acc:MGI:97302]	13	1.22418	0.072344	0.835161	18.9954	23.2462
ENSMUSG00000024975	Pdcd4	programmed cell death 4 [Source:MGI Symbol;Acc:MGI:107490]	19	1.19725	0.0723498	0.835161	113.37	135.743
ENSMUSG00000003051	Elf3	E74-like factor 3 [Source:MGI Symbol;Acc:MGI:1101781]	1	-1.72787	0.0723945	0.835161	2.88879	1.66753
ENSMUSG00000027099	Mtx2	metaxin 2 [Source:MGI Symbol;Acc:MGI:1859652]	2	1.44378	0.0725009	0.835161	2.51467	3.63244
ENSMUSG00000041736	Tspo	translocator protein [Source:MGI Symbol;Acc:MGI:88222]	15	1.54792	0.07253	0.835161	5.92111	9.19691
ENSMUSG00000027351	Spred1	sprouty protein with EVH-1 domain 1, related sequence [Source:MGI Symbol;Acc:MGI:2150016]	2	-1.22992	0.0725634	0.835161	9.69777	7.87962
ENSMUSG00000018648	Dusp14	dual specificity phosphatase 14 [Source:MGI Symbol;Acc:MGI:1927168]	11	-1.9957	0.0726508	0.835161	1.79037	0.896156
ENSMUSG00000107200	Gm43039	predicted gene 43039 [Source:MGI Symbol;Acc:MGI:5663176]	5	-3.16568	0.0728205	0.835161	2.33661	0.744531
ENSMUSG00000002846	Timmdc1	translocase of inner mitochondrial membrane domain containing 1 [Source:MGI Symbol;Acc:MGI:1922139]	16	1.29278	0.0730603	0.835161	12.5913	16.2877
ENSMUSG00000025185	Loxl4	lysyl oxidase-like 4 [Source:MGI Symbol;Acc:MGI:1914823]	19	-2.62321	0.0730915	0.835161	0.433152	0.166515
ENSMUSG00000062376	Borcs7	BLOC-1 related complex subunit 7 [Source:MGI Symbol;Acc:MGI:1913689]	19	1.39214	0.0731239	0.835161	5.32986	7.4254
ENSMUSG00000055197	Fev	FEV transcription factor, ETS family member [Source:MGI Symbol;Acc:MGI:2449712]	1	-2.42952	0.0732254	0.835161	3.48392	1.44015
ENSMUSG00000026956	Uap1l1	UDP-N-acteylglucosamine pyrophosphorylase 1-like 1 [Source:MGI Symbol;Acc:MGI:2443318]	2	-1.50283	0.0732594	0.835161	2.88961	1.92264
ENSMUSG00000044083	Efcab8	EF-hand calcium binding domain 8 [Source:MGI Symbol;Acc:MGI:3644206]	2	-1.92233	0.0733297	0.835161	0.542864	0.281865
ENSMUSG00000016181	Utp25	UTP25 small subunit processome component [Source:MGI Symbol;Acc:MGI:2138080]	1	-1.5958	0.0733303	0.835161	1.69189	1.06087
ENSMUSG00000105556	Gm43080	predicted gene 43080 [Source:MGI Symbol;Acc:MGI:5663217]	3	-2.42458	0.0733655	0.835161	1.10393	0.45294
ENSMUSG00000033855	Ston1	stonin 1 [Source:MGI Symbol;Acc:MGI:1924307]	17	1.28518	0.073394	0.835161	5.7066	7.34209
ENSMUSG00000020733	Slc9a3r1	solute carrier family 9 (sodium/hydrogen exchanger), member 3 regulator 1 [Source:MGI Symbol;Acc:MGI:1349482]	11	1.41935	0.0734036	0.835161	7.80497	11.0611
ENSMUSG00000037669	Ldah	lipid droplet associated hydrolase [Source:MGI Symbol;Acc:MGI:1916082]	12	1.34832	0.0734037	0.835161	2.23655	3.01463
ENSMUSG00000050912	Tmem123	transmembrane protein 123 [Source:MGI Symbol;Acc:MGI:1919179]	9	1.2027	0.0734959	0.835161	36.2106	43.5705
ENSMUSG00000050953	Gja1	gap junction protein, alpha 1 [Source:MGI Symbol;Acc:MGI:95713]	10	1.22491	0.0735327	0.835161	30.8742	37.8179
ENSMUSG00000041488	Stx3	syntaxin 3 [Source:MGI Symbol;Acc:MGI:103077]	19	-1.25344	0.0736118	0.835161	9.20429	7.34615
ENSMUSG00000018340	Anxa6	annexin A6 [Source:MGI Symbol;Acc:MGI:88255]	11	1.23076	0.0736146	0.835161	15.5265	19.116
ENSMUSG00000003528	Slc25a1	solute carrier family 25 (mitochondrial carrier, citrate transporter), member 1 [Source:MGI Symbol;Acc:MGI:1345283]	16	1.29878	0.0736199	0.835161	10.1421	13.1896
ENSMUSG00000038068	Rnf144b	ring finger protein 144B [Source:MGI Symbol;Acc:MGI:2384986]	13	-2.04118	0.0736206	0.835161	0.756097	0.365936
ENSMUSG00000038456	Dennd2a	DENN/MADD domain containing 2A [Source:MGI Symbol;Acc:MGI:2444961]	6	-1.26568	0.0736948	0.835189	6.75827	5.34698
ENSMUSG00000034800	Zfp661	zinc finger protein 661 [Source:MGI Symbol;Acc:MGI:1919430]	2	2.40207	0.0737822	0.835189	0.157435	0.379664
ENSMUSG00000031070	Mrgprf	MAS-related GPR, member F [Source:MGI Symbol;Acc:MGI:2384823]	7	1.74422	0.073819	0.835189	1.79152	3.12475
ENSMUSG00000050973	Gdpgp1	GDP-D-glucose phosphorylase 1 [Source:MGI Symbol;Acc:MGI:2443429]	7	-1.76116	0.0738724	0.835189	1.23142	0.703546
ENSMUSG00000028832	Stmn1	stathmin 1 [Source:MGI Symbol;Acc:MGI:96739]	4	1.23057	0.0739666	0.835189	33.2534	40.932
ENSMUSG00000006127	Inpp5k	inositol polyphosphate 5-phosphatase K [Source:MGI Symbol;Acc:MGI:1194899]	11	-1.3379	0.073994	0.835189	5.16258	3.85759
ENSMUSG00000106798	Gm43275	predicted gene 43275 [Source:MGI Symbol;Acc:MGI:5663412]	5	-2.49158	0.0742136	0.835189	1.7531	0.709878
ENSMUSG00000097430	Gm10544	predicted gene 10544 [Source:MGI Symbol;Acc:MGI:3642892]	18	-1.70068	0.0742216	0.835189	1.40585	0.828447
ENSMUSG00000049858	Suox	sulfite oxidase [Source:MGI Symbol;Acc:MGI:2446117]	10	1.42726	0.0743707	0.835189	4.50378	6.42252
ENSMUSG00000038822	Hace1	HECT domain and ankyrin repeat containing, E3 ubiquitin protein ligase 1 [Source:MGI Symbol;Acc:MGI:2446110]	10	-1.33694	0.0744374	0.835189	2.25234	1.68505
ENSMUSG00000103898	Gm30238	predicted gene, 30238 [Source:MGI Symbol;Acc:MGI:5589397]	12	-2.34053	0.0745419	0.835189	0.637372	0.27257
ENSMUSG00000046169	Adamts6	a disintegrin-like and metallopeptidase (reprolysin type) with thrombospondin type 1 motif, 6 [Source:MGI Symbol;Acc:MGI:1347348]	13	-1.32768	0.0746027	0.835189	5.00879	3.77591
ENSMUSG00000074340	Ovgp1	oviductal glycoprotein 1 [Source:MGI Symbol;Acc:MGI:106661]	3	-2.48502	0.0746594	0.835189	0.616283	0.249394
ENSMUSG00000023959	Clic5	chloride intracellular channel 5 [Source:MGI Symbol;Acc:MGI:1917912]	17	1.86405	0.0746678	0.835189	0.362491	0.677552
ENSMUSG00000024369	Nelfe	negative elongation factor complex member E, Rdbp [Source:MGI Symbol;Acc:MGI:102744]	17	1.31078	0.074692	0.835189	10.2274	13.4223
ENSMUSG00000029405	G3bp2	GTPase activating protein (SH3 domain) binding protein 2 [Source:MGI Symbol;Acc:MGI:2442040]	5	1.20531	0.074725	0.835189	16.2795	19.6171
ENSMUSG00000081137	BC022960	cDNA sequence BC022960 [Source:MGI Symbol;Acc:MGI:2670977]	X	-1.81856	0.0749579	0.835189	2.62952	1.44698
ENSMUSG00000026600	Soat1	sterol O-acyltransferase 1 [Source:MGI Symbol;Acc:MGI:104665]	1	-1.34695	0.0749607	0.835189	2.22313	1.65021
ENSMUSG00000038319	Kcnh2	potassium voltage-gated channel, subfamily H (eag-related), member 2 [Source:MGI Symbol;Acc:MGI:1341722]	5	1.2791	0.0749726	0.835189	10.804	13.8152
ENSMUSG00000029199	Lias	lipoic acid synthetase [Source:MGI Symbol;Acc:MGI:1934604]	5	-1.4565	0.0750117	0.835189	2.76945	1.89979
ENSMUSG00000001507	Itga3	integrin alpha 3 [Source:MGI Symbol;Acc:MGI:96602]	11	1.19051	0.0750463	0.835189	32.5725	38.7762
ENSMUSG00000102235	Gm37886	predicted gene, 37886 [Source:MGI Symbol;Acc:MGI:5611114]	1	-2.57842	0.0750568	0.835189	1.15474	0.446445
ENSMUSG00000029823	Luc7l2	LUC7-like 2 (S. cerevisiae) [Source:MGI Symbol;Acc:MGI:2183260]	6	-1.20757	0.075082	0.835189	26.9727	22.3383
ENSMUSG00000021917	Spcs1	signal peptidase complex subunit 1 homolog (S. cerevisiae) [Source:MGI Symbol;Acc:MGI:1916269]	14	1.31329	0.0751079	0.835189	12.2965	16.1502
ENSMUSG00000040550	Otud6b	OTU domain containing 6B [Source:MGI Symbol;Acc:MGI:1919451]	4	1.21367	0.0751158	0.835189	17.8327	21.6422
ENSMUSG00000101778	Gm29488	predicted gene 29488 [Source:MGI Symbol;Acc:MGI:5580194]	1	-2.9011	0.0751823	0.835189	0.464863	0.157173
ENSMUSG00000063015	Ccni	cyclin I [Source:MGI Symbol;Acc:MGI:1341077]	5	1.18728	0.075192	0.835189	42.8319	50.8537
ENSMUSG00000071537	Klrg2	killer cell lectin-like receptor subfamily G, member 2 [Source:MGI Symbol;Acc:MGI:1921503]	6	-1.63993	0.0753532	0.835571	1.97273	1.20744
ENSMUSG00000029166	Mapre3	microtubule-associated protein, RP/EB family, member 3 [Source:MGI Symbol;Acc:MGI:2140967]	5	-1.20676	0.0753784	0.835571	28.6883	23.7732
ENSMUSG00000035929	H2-Q4	histocompatibility 2, Q region locus 4 [Source:MGI Symbol;Acc:MGI:95933]	17	-1.47935	0.0754008	0.835571	5.71699	3.87293
ENSMUSG00000006154	Eps8l1	EPS8-like 1 [Source:MGI Symbol;Acc:MGI:1914675]	7	-2.08856	0.0754907	0.835923	0.455814	0.215025
ENSMUSG00000034333	Zbed4	zinc finger, BED type containing 4 [Source:MGI Symbol;Acc:MGI:2682302]	15	-1.6783	0.0756184	0.835969	0.968034	0.577496
ENSMUSG00000020547	Bzw2	basic leucine zipper and W2 domains 2 [Source:MGI Symbol;Acc:MGI:1914162]	12	-1.45006	0.0757459	0.835969	2.24539	1.54626
ENSMUSG00000030259	Rassf8	Ras association (RalGDS/AF-6) domain family (N-terminal) member 8 [Source:MGI Symbol;Acc:MGI:1918573]	6	-1.27223	0.0757602	0.835969	7.32957	5.76463
ENSMUSG00000037679	Inf2	inverted formin, FH2 and WH2 domain containing [Source:MGI Symbol;Acc:MGI:1917685]	12	-1.20817	0.075789	0.835969	42.4477	35.1368
ENSMUSG00000005982	Naa60	N(alpha)-acetyltransferase 60, NatF catalytic subunit [Source:MGI Symbol;Acc:MGI:1922013]	16	1.32048	0.0758003	0.835969	5.97412	7.89456
ENSMUSG00000039801	Cplane1	ciliogenesis and planar polarity effector 1 [Source:MGI Symbol;Acc:MGI:1920942]	15	-1.21668	0.075927	0.835969	5.8628	4.81932
ENSMUSG00000095562	Erdr1	erythroid differentiation regulator 1 [Source:NCBI gene (formerly Entrezgene);Acc:170942]	X	-2.10633	0.0759506	0.835969	5.13755	2.43765
ENSMUSG00000056019	Zfp709	zinc finger protein 709 [Source:MGI Symbol;Acc:MGI:2384299]	8	-1.51989	0.0759602	0.835969	1.22656	0.80925
ENSMUSG00000038489	Polr2l	polymerase (RNA) II (DNA directed) polypeptide L [Source:MGI Symbol;Acc:MGI:1913741]	7	1.32974	0.076027	0.836065	10.1343	13.4723
ENSMUSG00000041264	Uspl1	ubiquitin specific peptidase like 1 [Source:MGI Symbol;Acc:MGI:2442342]	5	-1.25738	0.0761313	0.836232	4.69154	3.73439
ENSMUSG00000110282	B930086L07Rik	RIKEN cDNA B930086L07 gene [Source:MGI Symbol;Acc:MGI:2443202]	7	-1.82584	0.0761586	0.836232	1.92715	1.06173
ENSMUSG00000040594	Ranbp17	RAN binding protein 17 [Source:MGI Symbol;Acc:MGI:1929706]	11	-1.43723	0.0762841	0.836804	1.42579	0.992925
ENSMUSG00000019731	Slc35e1	solute carrier family 35, member E1 [Source:MGI Symbol;Acc:MGI:2142403]	8	1.25637	0.0763365	0.836804	8.1147	10.1882
ENSMUSG00000077192	Snora17	small nucleolar RNA, H/ACA box 17 [Source:MGI Symbol;Acc:MGI:4360060]	2	-2.62194	0.0763853	0.836804	12.1053	4.46754
ENSMUSG00000059839	Zfp874b	zinc finger protein 874b [Source:MGI Symbol;Acc:MGI:3040702]	13	-1.70305	0.076505	0.836968	1.53318	0.897768
ENSMUSG00000026032	Ndufb3	NADH:ubiquinone oxidoreductase subunit B3 [Source:MGI Symbol;Acc:MGI:1913745]	1	1.54518	0.0765353	0.836968	6.52115	10.0943
ENSMUSG00000015341	Golga7	golgi autoantigen, golgin subfamily a, 7 [Source:MGI Symbol;Acc:MGI:1931029]	8	1.22328	0.0766664	0.836968	7.24305	8.8644
ENSMUSG00000034636	Zyg11b	zyg-ll family member B, cell cycle regulator [Source:MGI Symbol;Acc:MGI:2685277]	4	1.20801	0.0766715	0.836968	8.35527	10.0875
ENSMUSG00000050989	Selenon	selenoprotein N [Source:MGI Symbol;Acc:MGI:2151208]	4	1.24967	0.0766915	0.836968	9.89375	12.3665
ENSMUSG00000030560	Ctsc	cathepsin C [Source:MGI Symbol;Acc:MGI:109553]	7	-1.68469	0.0767779	0.837275	4.07352	2.41754
ENSMUSG00000110077	Gm45632	predicted gene 45632 [Source:MGI Symbol;Acc:MGI:5791468]	7	-2.19593	0.076886	0.837819	1.43249	0.645997
ENSMUSG00000022636	Alcam	activated leukocyte cell adhesion molecule [Source:MGI Symbol;Acc:MGI:1313266]	16	-1.70106	0.0770713	0.839202	1.48653	0.874736
ENSMUSG00000019370	Calm3	calmodulin 3 [Source:MGI Symbol;Acc:MGI:103249]	7	1.19716	0.0771652	0.839515	219.836	263.189
ENSMUSG00000045100	Slc25a26	solute carrier family 25 (mitochondrial carrier, phosphate carrier), member 26 [Source:MGI Symbol;Acc:MGI:1914832]	6	-1.8023	0.0772169	0.839515	0.81086	0.448769
ENSMUSG00000022110	Sucla2	succinate-Coenzyme A ligase, ADP-forming, beta subunit [Source:MGI Symbol;Acc:MGI:1306775]	14	1.25563	0.077289	0.839663	10.1015	12.69
ENSMUSG00000041459	Tardbp	TAR DNA binding protein [Source:MGI Symbol;Acc:MGI:2387629]	4	-1.206	0.0773538	0.839733	13.4246	11.1376
ENSMUSG00000028794	A3galt2	alpha 1,3-galactosyltransferase 2 (isoglobotriaosylceramide synthase) [Source:MGI Symbol;Acc:MGI:2685279]	4	-2.34908	0.0774398	0.839748	0.608824	0.255164
ENSMUSG00000042712	Tceal9	transcription elongation factor A like 9 [Source:MGI Symbol;Acc:MGI:109567]	X	1.22413	0.0774819	0.839748	54.4547	66.6601
ENSMUSG00000021537	Cetn3	centrin 3 [Source:MGI Symbol;Acc:MGI:1097706]	13	1.22268	0.0775305	0.839748	19.8419	24.2589
ENSMUSG00000037845	Fdxacb1	ferredoxin-fold anticodon binding domain containing 1 [Source:MGI Symbol;Acc:MGI:3584513]	9	-1.90042	0.0777419	0.841404	1.2574	0.656446
ENSMUSG00000039153	Runx2	runt related transcription factor 2 [Source:MGI Symbol;Acc:MGI:99829]	17	-1.86824	0.0778554	0.841553	0.352256	0.188138
ENSMUSG00000054676	1600014C10Rik	RIKEN cDNA 1600014C10 gene [Source:MGI Symbol;Acc:MGI:1919494]	7	1.75246	0.0780156	0.841553	0.590037	1.03829
ENSMUSG00000045896	Paip2b	poly(A) binding protein interacting protein 2B [Source:MGI Symbol;Acc:MGI:2386865]	6	1.21625	0.0780263	0.841553	8.01852	9.75451
ENSMUSG00000009378	Slc16a12	solute carrier family 16 (monocarboxylic acid transporters), member 12 [Source:MGI Symbol;Acc:MGI:2147716]	19	1.24798	0.0781172	0.841553	10.2622	12.8096
ENSMUSG00000030339	Ltbr	lymphotoxin B receptor [Source:MGI Symbol;Acc:MGI:104875]	6	-1.28511	0.0781209	0.841553	15.6902	12.2255
ENSMUSG00000029439	Sfswap	splicing factor SWAP [Source:MGI Symbol;Acc:MGI:101760]	5	-1.20836	0.0781384	0.841553	10.5561	8.73189
ENSMUSG00000031513	Leprotl1	leptin receptor overlapping transcript-like 1 [Source:MGI Symbol;Acc:MGI:1915442]	8	1.34195	0.0782154	0.841553	5.54261	7.43851
ENSMUSG00000102594	Gm38381	predicted gene, 38381 [Source:MGI Symbol;Acc:MGI:5611609]	1	-2.06728	0.0782241	0.841553	1.66125	0.800575
ENSMUSG00000042719	Naa25	N(alpha)-acetyltransferase 25, NatB auxiliary subunit [Source:MGI Symbol;Acc:MGI:2442563]	5	-1.39692	0.0785831	0.842888	4.83007	3.45907
ENSMUSG00000067916	Zfp991	zinc finger protein 991 [Source:MGI Symbol;Acc:MGI:3701604]	4	1.4763	0.0786247	0.842888	2.43376	3.59374
ENSMUSG00000049303	Syt12	synaptotagmin XII [Source:MGI Symbol;Acc:MGI:2159601]	19	-2.40705	0.0787043	0.842888	0.30517	0.126254
ENSMUSG00000025207	Sema4g	sema domain, immunoglobulin domain (Ig), transmembrane domain (TM) and short cytoplasmic domain, (semaphorin) 4G [Source:MGI Symbol;Acc:MGI:1347047]	19	-1.98074	0.0788054	0.842888	0.492824	0.248613
ENSMUSG00000037995	Igsf9	immunoglobulin superfamily, member 9 [Source:MGI Symbol;Acc:MGI:2135283]	1	-1.453	0.0788421	0.842888	2.72244	1.87759
ENSMUSG00000105561	Gm43462	predicted gene 43462 [Source:MGI Symbol;Acc:MGI:5663599]	3	-2.06045	0.0788579	0.842888	0.81216	0.395402
ENSMUSG00000108394	Gm45477	predicted gene 45477 [Source:MGI Symbol;Acc:MGI:5791313]	3	-2.09179	0.0788845	0.842888	0.486396	0.233087
ENSMUSG00000105202	C230031I18Rik	RIKEN cDNA C230031I18 gene [Source:MGI Symbol;Acc:MGI:2445192]	3	-1.75084	0.0790031	0.842888	2.80924	1.60422
ENSMUSG00000021578	Ccdc127	coiled-coil domain containing 127 [Source:MGI Symbol;Acc:MGI:1914683]	13	1.26575	0.0790203	0.842888	3.26842	4.13383
ENSMUSG00000046152	Fut10	fucosyltransferase 10 [Source:MGI Symbol;Acc:MGI:2384748]	8	1.60683	0.0791368	0.842888	1.44811	2.3284
ENSMUSG00000028107	Tars2	threonyl-tRNA synthetase 2, mitochondrial (putative) [Source:MGI Symbol;Acc:MGI:1919057]	3	-1.49576	0.079202	0.842888	2.49403	1.66786
ENSMUSG00000013663	Pten	phosphatase and tensin homolog [Source:MGI Symbol;Acc:MGI:109583]	19	1.18933	0.079276	0.842888	10.5441	12.5379
ENSMUSG00000020886	Dlg4	discs large MAGUK scaffold protein 4 [Source:MGI Symbol;Acc:MGI:1277959]	11	-1.23471	0.0793624	0.842888	5.20604	4.21223
ENSMUSG00000033767	Tmem131l	transmembrane 131 like [Source:MGI Symbol;Acc:MGI:2443399]	3	-1.51296	0.0793625	0.842888	1.13525	0.749605
ENSMUSG00000040943	Tet2	tet methylcytosine dioxygenase 2 [Source:MGI Symbol;Acc:MGI:2443298]	3	-1.26679	0.0793964	0.842888	4.09209	3.23094
ENSMUSG00000026790	Odf2	outer dense fiber of sperm tails 2 [Source:MGI Symbol;Acc:MGI:1098824]	2	-1.29838	0.0794037	0.842888	4.92176	3.79158
ENSMUSG00000098866	Mir6539	microRNA 6539 [Source:MGI Symbol;Acc:MGI:5530846]	14	-2.8014	0.0794723	0.842888	17.9864	6.51003
ENSMUSG00000037221	Mospd3	motile sperm domain containing 3 [Source:MGI Symbol;Acc:MGI:1916179]	5	1.43706	0.0795462	0.842888	4.74705	6.82726
ENSMUSG00000022523	Fgf12	fibroblast growth factor 12 [Source:MGI Symbol;Acc:MGI:109183]	16	-2.07815	0.079554	0.842888	5.71204	2.74776
ENSMUSG00000029033	Acap3	ArfGAP with coiled-coil, ankyrin repeat and PH domains 3 [Source:MGI Symbol;Acc:MGI:2153589]	4	-1.38727	0.0795552	0.842888	3.5964	2.58629
ENSMUSG00000103238	Gm36527	predicted gene, 36527 [Source:MGI Symbol;Acc:MGI:5595686]	1	-2.21835	0.0795797	0.842888	1.22349	0.557624
ENSMUSG00000020074	Ccar1	cell division cycle and apoptosis regulator 1 [Source:MGI Symbol;Acc:MGI:1914750]	10	-1.18299	0.0797356	0.843757	10.3136	8.71794
ENSMUSG00000026027	Stradb	STE20-related kinase adaptor beta [Source:MGI Symbol;Acc:MGI:2144047]	1	1.47557	0.0798338	0.843757	1.10576	1.63571
ENSMUSG00000033307	Mif	macrophage migration inhibitory factor (glycosylation-inhibiting factor) [Source:MGI Symbol;Acc:MGI:96982]	10	1.19434	0.079893	0.843757	147.899	176.581
ENSMUSG00000035283	Adrb1	adrenergic receptor, beta 1 [Source:MGI Symbol;Acc:MGI:87937]	19	2.22296	0.079966	0.843757	0.340642	0.756158
ENSMUSG00000023826	Prkn	parkin RBR E3 ubiquitin protein ligase [Source:MGI Symbol;Acc:MGI:1355296]	17	-1.56164	0.080004	0.843757	0.961539	0.616733
ENSMUSG00000047910	Pcdhb16	protocadherin beta 16 [Source:MGI Symbol;Acc:MGI:2136752]	18	-1.62713	0.080014	0.843757	1.91961	1.18276
ENSMUSG00000019832	Rab32	RAB32, member RAS oncogene family [Source:MGI Symbol;Acc:MGI:1915094]	10	1.56659	0.0801841	0.844179	2.06424	3.23255
ENSMUSG00000007379	Dennd2c	DENN/MADD domain containing 2C [Source:MGI Symbol;Acc:MGI:3036254]	3	-2.31686	0.0802936	0.844179	0.237705	0.102039
ENSMUSG00000061689	Dlgap4	DLG associated protein 4 [Source:MGI Symbol;Acc:MGI:2138865]	2	-1.23848	0.0804539	0.844179	6.5724	5.30403
ENSMUSG00000028910	Mecr	mitochondrial trans-2-enoyl-CoA reductase [Source:MGI Symbol;Acc:MGI:1349441]	4	-1.47228	0.080653	0.844179	5.25752	3.58324
ENSMUSG00000097587	4930578M01Rik	RIKEN cDNA 4930578M01 gene [Source:MGI Symbol;Acc:MGI:1923201]	15	-1.47529	0.0806988	0.844179	2.05898	1.3932
ENSMUSG00000040152	Thbs1	thrombospondin 1 [Source:MGI Symbol;Acc:MGI:98737]	2	-1.95308	0.0807257	0.844179	5.09107	2.60337
ENSMUSG00000022390	Zc3h7b	zinc finger CCCH type containing 7B [Source:MGI Symbol;Acc:MGI:1328310]	15	1.19835	0.0807701	0.844179	26.8802	32.214
ENSMUSG00000028497	Hacd4	3-hydroxyacyl-CoA dehydratase 4 [Source:MGI Symbol;Acc:MGI:1914025]	4	1.20283	0.0808515	0.844179	9.61474	11.5595
ENSMUSG00000086629	2810403D21Rik	RIKEN cDNA 2810403D21 gene [Source:MGI Symbol;Acc:MGI:1917214]	X	-2.00365	0.080941	0.844179	0.257582	0.128088
ENSMUSG00000000346	Dazap2	DAZ associated protein 2 [Source:MGI Symbol;Acc:MGI:1344344]	15	1.21001	0.0809938	0.844179	18.5318	22.4241
ENSMUSG00000090733	Rps27	ribosomal protein S27 [Source:MGI Symbol;Acc:MGI:1888676]	3	1.25062	0.0811482	0.844179	47.6274	59.5614
ENSMUSG00000056383	AI987944	expressed sequence AI987944 [Source:MGI Symbol;Acc:MGI:2142079]	7	1.43457	0.0811967	0.844179	2.32389	3.33238
ENSMUSG00000074282	Zfp94	zinc finger protein 94 [Source:MGI Symbol;Acc:MGI:107610]	7	2.38134	0.0812008	0.844179	0.479573	1.13993
ENSMUSG00000019883	Echdc1	enoyl Coenzyme A hydratase domain containing 1 [Source:MGI Symbol;Acc:MGI:1277169]	10	1.29714	0.0812133	0.844179	4.61692	5.99461
ENSMUSG00000073096	Lrrc61	leucine rich repeat containing 61 [Source:MGI Symbol;Acc:MGI:2652848]	6	1.49904	0.0812195	0.844179	2.39189	3.57928
ENSMUSG00000002845	Tmem39a	transmembrane protein 39a [Source:MGI Symbol;Acc:MGI:1915096]	16	-1.72056	0.0813858	0.844179	2.36043	1.3739
ENSMUSG00000059013	Sh2d3c	SH2 domain containing 3C [Source:MGI Symbol;Acc:MGI:1351631]	2	-2.11846	0.0813898	0.844179	0.45407	0.209839
ENSMUSG00000002625	Akap8l	A kinase (PRKA) anchor protein 8-like [Source:MGI Symbol;Acc:MGI:1860606]	17	-1.1919	0.0813989	0.844179	18.1671	15.2437
ENSMUSG00000004383	Large1	LARGE xylosyl- and glucuronyltransferase 1 [Source:MGI Symbol;Acc:MGI:1342270]	8	-1.43784	0.0814183	0.844179	2.1681	1.50637
ENSMUSG00000021592	Arsk	arylsulfatase K [Source:MGI Symbol;Acc:MGI:1924291]	13	1.54087	0.0814222	0.844179	1.18387	1.82351
ENSMUSG00000037784	Dzip1l	DAZ interacting protein 1-like [Source:MGI Symbol;Acc:MGI:1919757]	9	-1.29853	0.081467	0.844179	3.62198	2.79336
ENSMUSG00000031828	Klhl36	kelch-like 36 [Source:MGI Symbol;Acc:MGI:2385305]	8	1.46719	0.0814962	0.844179	3.25079	4.76907
ENSMUSG00000092981	Mir5125	microRNA 5125 [Source:MGI Symbol;Acc:MGI:4950450]	17	-2.09251	0.081508	0.844179	45.7728	21.9853
ENSMUSG00000041153	Osgin2	oxidative stress induced growth inhibitor family member 2 [Source:MGI Symbol;Acc:MGI:2384798]	4	1.31193	0.0815337	0.844179	6.70449	8.79262
ENSMUSG00000032816	Igdcc4	immunoglobulin superfamily, DCC subclass, member 4 [Source:MGI Symbol;Acc:MGI:1858497]	9	-1.28048	0.0816169	0.844179	5.11318	3.99937
ENSMUSG00000028163	Nfkb1	nuclear factor of kappa light polypeptide gene enhancer in B cells 1, p105 [Source:MGI Symbol;Acc:MGI:97312]	3	-1.25626	0.08163	0.844179	3.47123	2.76604
ENSMUSG00000024614	Tmx3	thioredoxin-related transmembrane protein 3 [Source:MGI Symbol;Acc:MGI:2442418]	18	1.20599	0.081678	0.844179	6.11868	7.37948
ENSMUSG00000036078	Sigmar1	sigma non-opioid intracellular receptor 1 [Source:MGI Symbol;Acc:MGI:1195268]	4	1.49759	0.0816985	0.844179	2.23571	3.34378
ENSMUSG00000063480	Snu13	SNU13 homolog, small nuclear ribonucleoprotein (U4/U6.U5) [Source:MGI Symbol;Acc:MGI:893586]	15	1.26123	0.0818192	0.844819	10.4251	13.144
ENSMUSG00000037185	Krt80	keratin 80 [Source:MGI Symbol;Acc:MGI:1921377]	15	-2.21818	0.0819631	0.845433	0.34873	0.15572
ENSMUSG00000004891	Nes	nestin [Source:MGI Symbol;Acc:MGI:101784]	3	-1.23251	0.0820335	0.845433	7.79007	6.31635
ENSMUSG00000026275	Ppp1r7	protein phosphatase 1, regulatory subunit 7 [Source:MGI Symbol;Acc:MGI:1913635]	1	1.25582	0.0821043	0.845433	3.09156	3.88164
ENSMUSG00000024911	Fibp	fibroblast growth factor (acidic) intracellular binding protein [Source:MGI Symbol;Acc:MGI:1926233]	19	1.35641	0.0821553	0.845433	3.35966	4.56196
ENSMUSG00000103591	Gm38365	predicted gene, 38365 [Source:MGI Symbol;Acc:MGI:5611593]	1	-2.21114	0.0821729	0.845433	0.468271	0.209879
ENSMUSG00000108655	Gm44949	predicted gene 44949 [Source:MGI Symbol;Acc:MGI:5753525]	7	-2.80147	0.0825355	0.848557	1.106	0.402107
ENSMUSG00000119520	U4	U4 spliceosomal RNA [Source:RFAM;Acc:RF00015]	5	1.59283	0.0826157	0.84875	28.757	45.8112
ENSMUSG00000034488	Edil3	EGF-like repeats and discoidin I-like domains 3 [Source:MGI Symbol;Acc:MGI:1329025]	13	-2.33294	0.0826724	0.84875	0.260063	0.110121
ENSMUSG00000025500	Lmntd2	lamin tail domain containing 2 [Source:MGI Symbol;Acc:MGI:1919250]	7	-2.11101	0.0827752	0.849195	1.19523	0.564407
ENSMUSG00000028645	Slc2a1	solute carrier family 2 (facilitated glucose transporter), member 1 [Source:MGI Symbol;Acc:MGI:95755]	4	1.23124	0.0828444	0.849195	174.477	214.804
ENSMUSG00000027751	Supt20	SPT20 SAGA complex component [Source:MGI Symbol;Acc:MGI:1929651]	3	-1.31388	0.0829266	0.849195	8.41197	6.40743
ENSMUSG00000041453	Rpl21	ribosomal protein L21 [Source:MGI Symbol;Acc:MGI:1278340]	5	1.19248	0.0831415	0.849195	89.7979	107.083
ENSMUSG00000042572	Ube2q1	ubiquitin-conjugating enzyme E2Q family member 1 [Source:MGI Symbol;Acc:MGI:1917343]	3	1.22415	0.0831798	0.849195	7.85992	9.62366
ENSMUSG00000026096	Osgepl1	O-sialoglycoprotein endopeptidase-like 1 [Source:MGI Symbol;Acc:MGI:1919335]	1	1.59112	0.0831946	0.849195	0.667779	1.06641
ENSMUSG00000066392	Nrxn3	neurexin III [Source:MGI Symbol;Acc:MGI:1096389]	12	-1.57158	0.083242	0.849195	1.06828	0.679056
ENSMUSG00000028980	H6pd	hexose-6-phosphate dehydrogenase (glucose 1-dehydrogenase) [Source:MGI Symbol;Acc:MGI:2140356]	4	1.28187	0.0832511	0.849195	7.3931	9.46834
ENSMUSG00000020171	Yeats4	YEATS domain containing 4 [Source:MGI Symbol;Acc:MGI:1927224]	10	1.34203	0.0833925	0.849195	19.4389	26.0917
ENSMUSG00000021763	Cspg4b	chondroitin sulfate proteoglycan 4B [Source:MGI Symbol;Acc:MGI:3040697]	13	1.2448	0.0834799	0.849195	5.08481	6.33123
ENSMUSG00000106099	Gm42664	predicted gene 42664 [Source:MGI Symbol;Acc:MGI:5662801]	3	-1.63569	0.0835357	0.849195	2.32897	1.43179
ENSMUSG00000026608	Kctd3	potassium channel tetramerisation domain containing 3 [Source:MGI Symbol;Acc:MGI:2444629]	1	1.19489	0.0836214	0.849195	8.4671	10.1194
ENSMUSG00000114025	Gm49331	predicted gene, 49331 [Source:MGI Symbol;Acc:MGI:6121516]	12	-2.02729	0.0836233	0.849195	1.72037	0.840055
ENSMUSG00000047242	Taf9b	TATA-box binding protein associated factor 9B [Source:MGI Symbol;Acc:MGI:3039562]	X	1.52937	0.0836403	0.849195	2.35558	3.60839
ENSMUSG00000109321	A330076H08Rik	RIKEN cDNA A330076H08 gene [Source:MGI Symbol;Acc:MGI:2443193]	7	-2.09299	0.0836629	0.849195	0.719674	0.345952
ENSMUSG00000018326	Ywhab	tyrosine 3-monooxygenase/tryptophan 5-monooxygenase activation protein, beta polypeptide [Source:MGI Symbol;Acc:MGI:1891917]	2	1.18262	0.0837294	0.849195	35.4587	41.9319
ENSMUSG00000016382	Pls3	plastin 3 (T-isoform) [Source:MGI Symbol;Acc:MGI:104807]	X	1.21475	0.0838379	0.849195	15.0557	18.2811
ENSMUSG00000110393	Gm36445	predicted gene, 36445 [Source:MGI Symbol;Acc:MGI:5595604]	13	-1.77701	0.0838402	0.849195	1.9164	1.07044
ENSMUSG00000109438	Gm45073	predicted gene 45073 [Source:MGI Symbol;Acc:MGI:5753649]	8	-1.93183	0.0839114	0.849195	1.08124	0.559781
ENSMUSG00000037260	Hgsnat	heparan-alpha-glucosaminide N-acetyltransferase [Source:MGI Symbol;Acc:MGI:1196297]	8	1.36485	0.084024	0.849195	5.95319	8.12693
ENSMUSG00000051860	Samd7	sterile alpha motif domain containing 7 [Source:MGI Symbol;Acc:MGI:1923203]	3	-1.61862	0.0841426	0.849195	3.50499	2.15804
ENSMUSG00000026311	Asb1	ankyrin repeat and SOCS box-containing 1 [Source:MGI Symbol;Acc:MGI:1929735]	1	1.32348	0.0842325	0.849195	2.69639	3.57212
ENSMUSG00000036299	BC031181	cDNA sequence BC031181 [Source:MGI Symbol;Acc:MGI:3039614]	18	1.35312	0.084267	0.849195	8.31509	11.2692
ENSMUSG00000001642	Akr1b3	aldo-keto reductase family 1, member B3 (aldose reductase) [Source:MGI Symbol;Acc:MGI:1353494]	6	1.23657	0.0842969	0.849195	11.1969	13.8447
ENSMUSG00000028655	Mfsd2a	major facilitator superfamily domain containing 2A [Source:MGI Symbol;Acc:MGI:1923824]	4	1.34132	0.0846876	0.849195	9.17473	12.2938
ENSMUSG00000025758	Plk4	polo like kinase 4 [Source:MGI Symbol;Acc:MGI:101783]	3	-1.58215	0.084706	0.849195	1.0116	0.63984
ENSMUSG00000027881	Prpf38b	PRP38 pre-mRNA processing factor 38 (yeast) domain containing B [Source:MGI Symbol;Acc:MGI:1914171]	3	-1.21633	0.0847607	0.849195	9.49936	7.80611
ENSMUSG00000036598	Ccdc113	coiled-coil domain containing 113 [Source:MGI Symbol;Acc:MGI:3606076]	8	-2.16652	0.0847935	0.849195	1.34853	0.624643
ENSMUSG00000106022	Gm42929	predicted gene 42929 [Source:MGI Symbol;Acc:MGI:5663066]	3	-2.05777	0.0848232	0.849195	3.3876	1.65099
ENSMUSG00000060572	Mfap2	microfibrillar-associated protein 2 [Source:MGI Symbol;Acc:MGI:99559]	4	1.33633	0.0848271	0.849195	13.213	17.6385
ENSMUSG00000091971	Hspa1a	heat shock protein 1A [Source:MGI Symbol;Acc:MGI:96244]	17	-1.48902	0.0848913	0.849195	4.82593	3.23553
ENSMUSG00000059493	Nhs	NHS actin remodeling regulator [Source:MGI Symbol;Acc:MGI:2684894]	X	-1.19044	0.0848999	0.849195	15.7097	13.2002
ENSMUSG00000117255	Gm49864	predicted gene, 49864 [Source:MGI Symbol;Acc:MGI:6270538]	17	-2.24497	0.0849577	0.849195	0.556562	0.24054
ENSMUSG00000061838	Suclg2	succinate-Coenzyme A ligase, GDP-forming, beta subunit [Source:MGI Symbol;Acc:MGI:1306824]	6	1.19553	0.0850882	0.849195	17.5875	21.0351
ENSMUSG00000060636	Rpl35a	ribosomal protein L35A [Source:MGI Symbol;Acc:MGI:1928894]	16	1.21007	0.0851292	0.849195	20.5511	24.8853
ENSMUSG00000008822	Acyp1	acylphosphatase 1, erythrocyte (common) type [Source:MGI Symbol;Acc:MGI:1913454]	12	2.06978	0.0851809	0.849195	0.769184	1.59686
ENSMUSG00000039765	Cc2d2a	coiled-coil and C2 domain containing 2A [Source:MGI Symbol;Acc:MGI:1924487]	5	-1.30723	0.0852701	0.849195	6.05336	4.63373
ENSMUSG00000063428	Ddo	D-aspartate oxidase [Source:MGI Symbol;Acc:MGI:1925528]	10	-1.33646	0.0852927	0.849195	2.66458	1.99463
ENSMUSG00000037553	Zdhhc18	zinc finger, DHHC domain containing 18 [Source:MGI Symbol;Acc:MGI:3527792]	4	-1.31683	0.0853222	0.849195	6.22649	4.73098
ENSMUSG00000030689	Ino80e	INO80 complex subunit E [Source:MGI Symbol;Acc:MGI:2141881]	7	1.32606	0.0853677	0.849195	2.65442	3.51761
ENSMUSG00000085315	A430018G15Rik	RIKEN cDNA A430018G15 gene [Source:MGI Symbol;Acc:MGI:3040796]	2	-2.4137	0.0853775	0.849195	0.781986	0.326702
ENSMUSG00000041881	Ndufa7	NADH:ubiquinone oxidoreductase subunit A7 [Source:MGI Symbol;Acc:MGI:1913666]	17	1.32457	0.0854657	0.849195	8.74488	11.5782
ENSMUSG00000118410		zinc finger protein 75a (ZNF75A) pseudogene	16	-2.623	0.0855026	0.849195	1.99236	0.767665
ENSMUSG00000035948	Acss3	acyl-CoA synthetase short-chain family member 3 [Source:MGI Symbol;Acc:MGI:2685720]	10	1.26957	0.0855418	0.849195	5.89207	7.47975
ENSMUSG00000020741	Cluh	clustered mitochondria (cluA/CLU1) homolog [Source:MGI Symbol;Acc:MGI:1921398]	11	-1.24107	0.0856212	0.849195	7.60286	6.13284
ENSMUSG00000031540	Kat6a	K(lysine) acetyltransferase 6A [Source:MGI Symbol;Acc:MGI:2442415]	8	1.20407	0.0857479	0.849195	16.2607	19.5713
ENSMUSG00000045932	Ifit2	interferon-induced protein with tetratricopeptide repeats 2 [Source:MGI Symbol;Acc:MGI:99449]	19	1.29133	0.0858192	0.849195	7.13458	9.21279
ENSMUSG00000025732	Mcrip2	MAPK regulated corepressor interacting protein 2 [Source:MGI Symbol;Acc:MGI:1915491]	17	1.97591	0.0858932	0.849195	0.954962	1.88966
ENSMUSG00000080717	B230307C23Rik	RIKEN cDNA B230307C23 gene [Source:MGI Symbol;Acc:MGI:3643396]	16	-1.73625	0.0859139	0.849195	0.93851	0.540597
ENSMUSG00000109358	Gm44716	predicted gene 44716 [Source:MGI Symbol;Acc:MGI:5753292]	8	-2.12795	0.0859174	0.849195	4.85164	2.25888
ENSMUSG00000098146	Gm26935	predicted gene, 26935 [Source:MGI Symbol;Acc:MGI:5504050]	7	-2.44906	0.0860211	0.849195	3.1492	1.27679
ENSMUSG00000022999	Lmbr1l	limb region 1 like [Source:MGI Symbol;Acc:MGI:1289247]	15	-1.42338	0.0861023	0.849195	3.21854	2.2582
ENSMUSG00000006373	Pgrmc1	progesterone receptor membrane component 1 [Source:MGI Symbol;Acc:MGI:1858305]	X	1.21179	0.0861481	0.849195	40.3328	48.8612
ENSMUSG00000030337	Vamp1	vesicle-associated membrane protein 1 [Source:MGI Symbol;Acc:MGI:1313276]	6	-1.31385	0.0861831	0.849195	3.14145	2.39437
ENSMUSG00000055026	Gabrg3	gamma-aminobutyric acid (GABA) A receptor, subunit gamma 3 [Source:MGI Symbol;Acc:MGI:95624]	7	1.22039	0.0863231	0.849195	5.9461	7.25433
ENSMUSG00000034958	Atcay	ataxia, cerebellar, Cayman type [Source:MGI Symbol;Acc:MGI:2448730]	10	-2.03445	0.0864508	0.849195	0.618805	0.304548
ENSMUSG00000070509	Rgma	repulsive guidance molecule family member A [Source:MGI Symbol;Acc:MGI:2679262]	7	1.25548	0.086459	0.849195	6.91328	8.68271
ENSMUSG00000047945	Marcksl1	MARCKS-like 1 [Source:MGI Symbol;Acc:MGI:97143]	4	1.24499	0.0865013	0.849195	19.6915	24.5269
ENSMUSG00000032330	Cox7a2	cytochrome c oxidase subunit 7A2 [Source:MGI Symbol;Acc:MGI:1316715]	9	1.3373	0.0865643	0.849195	17.3001	23.1523
ENSMUSG00000032599	Ip6k2	inositol hexaphosphate kinase 2 [Source:MGI Symbol;Acc:MGI:1923750]	9	-1.28427	0.0865926	0.849195	11.4624	8.93256
ENSMUSG00000020277	Pfkl	phosphofructokinase, liver, B-type [Source:MGI Symbol;Acc:MGI:97547]	10	1.20335	0.0865957	0.849195	17.4602	21.0064
ENSMUSG00000027530	Fabp12	fatty acid binding protein 12 [Source:MGI Symbol;Acc:MGI:1922747]	3	-2.01201	0.0866049	0.849195	1.67222	0.825434
ENSMUSG00000022951	Rcan1	regulator of calcineurin 1 [Source:MGI Symbol;Acc:MGI:1890564]	16	1.24759	0.0866466	0.849195	42.8058	53.39
ENSMUSG00000015944	Castor2	cytosolic arginine sensor for mTORC1 subunit 2 [Source:MGI Symbol;Acc:MGI:1933384]	5	1.2462	0.0866671	0.849195	8.02853	10.0096
ENSMUSG00000106184	Gm43463	predicted gene 43463 [Source:MGI Symbol;Acc:MGI:5663600]	3	-2.95619	0.0867063	0.849195	0.776682	0.256712
ENSMUSG00000050967	Creg2	cellular repressor of E1A-stimulated genes 2 [Source:MGI Symbol;Acc:MGI:1928333]	1	-1.74754	0.0867362	0.849195	0.652378	0.37369
ENSMUSG00000018800	Abca5	ATP-binding cassette, sub-family A (ABC1), member 5 [Source:MGI Symbol;Acc:MGI:2386607]	11	1.1881	0.0867814	0.849195	13.1755	15.6507
ENSMUSG00000021621	Zcchc9	zinc finger, CCHC domain containing 9 [Source:MGI Symbol;Acc:MGI:1916335]	13	1.34777	0.0867848	0.849195	4.01877	5.41916
ENSMUSG00000033938	Ndufb7	NADH:ubiquinone oxidoreductase subunit B7 [Source:MGI Symbol;Acc:MGI:1914166]	8	1.24761	0.0867924	0.849195	7.79568	9.71834
ENSMUSG00000034412	Tbc1d10a	TBC1 domain family, member 10a [Source:MGI Symbol;Acc:MGI:2144164]	11	-1.31728	0.0870065	0.85071	7.33723	5.57027
ENSMUSG00000026895	Ndufa8	NADH:ubiquinone oxidoreductase subunit A8 [Source:MGI Symbol;Acc:MGI:1915625]	2	1.26719	0.0870998	0.850758	26.8631	34.0349
ENSMUSG00000028680	Plk3	polo like kinase 3 [Source:MGI Symbol;Acc:MGI:109604]	4	-2.19246	0.0872206	0.850758	1.09552	0.497074
ENSMUSG00000042109	Csdc2	cold shock domain containing C2, RNA binding [Source:MGI Symbol;Acc:MGI:2146027]	15	1.19155	0.0872212	0.850758	17.2889	20.595
ENSMUSG00000027822	Slc33a1	solute carrier family 33 (acetyl-CoA transporter), member 1 [Source:MGI Symbol;Acc:MGI:1332247]	3	1.286	0.0872662	0.850758	6.08412	7.82586
ENSMUSG00000030882	Dnhd1	dynein heavy chain domain 1 [Source:MGI Symbol;Acc:MGI:1924755]	7	-1.50541	0.0873163	0.850758	0.687989	0.456772
ENSMUSG00000103039	Gm37123	predicted gene, 37123 [Source:MGI Symbol;Acc:MGI:5610351]	3	-2.38773	0.0873665	0.850758	1.81808	0.748592
ENSMUSG00000017740	Slc12a5	solute carrier family 12, member 5 [Source:MGI Symbol;Acc:MGI:1862037]	2	-1.36696	0.0875098	0.851576	4.53905	3.31489
ENSMUSG00000062683	Atp5g2	ATP synthase, H+ transporting, mitochondrial F0 complex, subunit C2 (subunit 9) [Source:MGI Symbol;Acc:MGI:1915192]	15	1.31428	0.0876259	0.852102	9.50275	12.5003
ENSMUSG00000038696	Mapkap1	mitogen-activated protein kinase associated protein 1 [Source:MGI Symbol;Acc:MGI:2444554]	2	1.2164	0.0876823	0.852102	13.311	16.2018
ENSMUSG00000108542	Gm44834	predicted gene 44834 [Source:MGI Symbol;Acc:MGI:5753410]	7	-2.58355	0.0878686	0.853121	1.52883	0.597202
ENSMUSG00000061576	Dpp6	dipeptidylpeptidase 6 [Source:MGI Symbol;Acc:MGI:94921]	5	-1.83534	0.0880153	0.853121	0.43166	0.232865
ENSMUSG00000072235	Tuba1a	tubulin, alpha 1A [Source:MGI Symbol;Acc:MGI:98869]	15	1.19117	0.0880522	0.853121	155.689	185.475
ENSMUSG00000033147	Slc22a15	solute carrier family 22 (organic anion/cation transporter), member 15 [Source:MGI Symbol;Acc:MGI:3607704]	3	-1.35425	0.0881885	0.853121	1.47741	1.09332
ENSMUSG00000102440	Pcdhga9	protocadherin gamma subfamily A, 9 [Source:MGI Symbol;Acc:MGI:1935226]	18	-1.50469	0.0881998	0.853121	2.40234	1.59675
ENSMUSG00000070605	Zfp992	zinc finger protein 992 [Source:MGI Symbol;Acc:MGI:3700963]	4	1.46185	0.0882671	0.853121	2.23113	3.26183
ENSMUSG00000017764	Zswim1	zinc finger SWIM-type containing 1 [Source:MGI Symbol;Acc:MGI:1919221]	2	1.53298	0.0883272	0.853121	1.98841	3.04879
ENSMUSG00000033751	Gadd45gip1	growth arrest and DNA-damage-inducible, gamma interacting protein 1 [Source:MGI Symbol;Acc:MGI:1914947]	8	-1.38834	0.0883924	0.853121	8.41575	6.07089
ENSMUSG00000024498	Tcerg1	transcription elongation regulator 1 (CA150) [Source:MGI Symbol;Acc:MGI:1926421]	18	-1.19308	0.0883945	0.853121	16.6827	13.99
ENSMUSG00000085156	Snhg15	small nucleolar RNA host gene 15 [Source:MGI Symbol;Acc:MGI:3650059]	11	-1.75263	0.0884716	0.853121	1.47097	0.840939
ENSMUSG00000042032	Mat2b	methionine adenosyltransferase II, beta [Source:MGI Symbol;Acc:MGI:1913667]	11	-1.31491	0.0884789	0.853121	4.3809	3.32928
ENSMUSG00000007989	Fzd3	frizzled class receptor 3 [Source:MGI Symbol;Acc:MGI:108476]	14	1.2265	0.0884995	0.853121	4.54762	5.57779
ENSMUSG00000020284	Cfap410	cilia and flagella associated protein 410 [Source:MGI Symbol;Acc:MGI:1915134]	10	-1.36522	0.0885762	0.853159	2.46618	1.80286
ENSMUSG00000025159	Mms19	MMS19 cytosolic iron-sulfur assembly component [Source:MGI Symbol;Acc:MGI:1919449]	19	-1.29698	0.0886221	0.853159	3.52606	2.7217
ENSMUSG00000046240	Hepacam	hepatocyte cell adhesion molecule [Source:MGI Symbol;Acc:MGI:1920177]	9	1.60437	0.0887376	0.853392	1.10655	1.7747
ENSMUSG00000031816	Mthfsd	methenyltetrahydrofolate synthetase domain containing [Source:MGI Symbol;Acc:MGI:2679252]	8	-1.33682	0.0887652	0.853392	1.9677	1.47396
ENSMUSG00000109239	Gm45176	predicted gene 45176 [Source:MGI Symbol;Acc:MGI:5753752]	7	-2.41741	0.088974	0.854828	0.502555	0.203119
ENSMUSG00000058240	Cryzl1	crystallin, zeta (quinone reductase)-like 1 [Source:MGI Symbol;Acc:MGI:1913859]	16	1.24627	0.0891692	0.856132	6.88268	8.58317
ENSMUSG00000069300	H2bc11	H2B clustered histone 11 [Source:MGI Symbol;Acc:MGI:2448388]	13	1.98923	0.0892945	0.856307	4.34841	8.67978
ENSMUSG00000027998	Plrg1	pleiotropic regulator 1 [Source:MGI Symbol;Acc:MGI:1858197]	3	1.40893	0.0893066	0.856307	3.41122	4.80455
ENSMUSG00000026781	Acbd5	acyl-Coenzyme A binding domain containing 5 [Source:MGI Symbol;Acc:MGI:1921409]	2	1.23521	0.0895906	0.858457	4.6001	5.68397
ENSMUSG00000023224	Serping1	serine (or cysteine) peptidase inhibitor, clade G, member 1 [Source:MGI Symbol;Acc:MGI:894696]	2	1.23322	0.0897559	0.859468	29.6518	36.5552
ENSMUSG00000103984	Gm37447	predicted gene, 37447 [Source:MGI Symbol;Acc:MGI:5610675]	1	-2.04662	0.0899971	0.861204	1.49526	0.72787
ENSMUSG00000019977	Hbs1l	Hbs1-like (S. cerevisiae) [Source:MGI Symbol;Acc:MGI:1891704]	10	-1.286	0.0900773	0.861398	6.24152	4.86094
ENSMUSG00000110702	Gm45767	predicted gene 45767 [Source:MGI Symbol;Acc:MGI:5804882]	8	-2.09524	0.0901695	0.861706	0.497915	0.237458
ENSMUSG00000005161	Prdx2	peroxiredoxin 2 [Source:MGI Symbol;Acc:MGI:109486]	8	1.19221	0.0902836	0.862224	28.8716	34.4105
ENSMUSG00000040649	Rimklb	ribosomal modification protein rimK-like family member B [Source:MGI Symbol;Acc:MGI:1918325]	6	1.27559	0.0903622	0.862401	4.25266	5.4293
ENSMUSG00000029726	Mepce	methylphosphate capping enzyme [Source:MGI Symbol;Acc:MGI:106477]	5	1.3382	0.0905003	0.863146	4.66966	6.25649
ENSMUSG00000074916	Chst14	carbohydrate sulfotransferase 14 [Source:MGI Symbol;Acc:MGI:1919386]	2	1.56952	0.0906127	0.863369	2.00336	3.15088
ENSMUSG00000032000	Birc3	baculoviral IAP repeat-containing 3 [Source:MGI Symbol;Acc:MGI:1197007]	9	-1.52036	0.0906449	0.863369	1.80555	1.18875
ENSMUSG00000034566	Atp5h	ATP synthase, H+ transporting, mitochondrial F0 complex, subunit D [Source:MGI Symbol;Acc:MGI:1918929]	11	1.17913	0.0909295	0.863369	119.48	140.899
ENSMUSG00000048058	Ldlrad3	low density lipoprotein receptor class A domain containing 3 [Source:MGI Symbol;Acc:MGI:2138856]	2	1.19787	0.090953	0.863369	18.0091	21.5743
ENSMUSG00000085334	Gm12940	predicted gene 12940 [Source:MGI Symbol;Acc:MGI:3702626]	4	-1.80255	0.0909631	0.863369	3.08901	1.72055
ENSMUSG00000080957	Gm15739	predicted gene 15739 [Source:MGI Symbol;Acc:MGI:3783181]	5	-2.28337	0.0910371	0.863369	2.23946	0.959674
ENSMUSG00000022241	Tars	threonyl-tRNA synthetase [Source:MGI Symbol;Acc:MGI:106314]	15	1.2414	0.0910466	0.863369	5.45824	6.78053
ENSMUSG00000032737	Inppl1	inositol polyphosphate phosphatase-like 1 [Source:MGI Symbol;Acc:MGI:1333787]	7	1.23544	0.0910809	0.863369	13.9807	17.2618
ENSMUSG00000043279	Trim56	tripartite motif-containing 56 [Source:MGI Symbol;Acc:MGI:2685298]	5	1.18954	0.0911639	0.863369	9.26686	11.0204
ENSMUSG00000008200	Fnbp4	formin binding protein 4 [Source:MGI Symbol;Acc:MGI:1860513]	2	-1.19189	0.0912395	0.863369	12.3607	10.3739
ENSMUSG00000064068	Mtx1	metaxin 1 [Source:MGI Symbol;Acc:MGI:103025]	3	1.45396	0.0912632	0.863369	2.50586	3.6423
ENSMUSG00000022043	Trim35	tripartite motif-containing 35 [Source:MGI Symbol;Acc:MGI:1914104]	14	1.18991	0.0912939	0.863369	16.5616	19.7138
ENSMUSG00000001909	Trmt1	tRNA methyltransferase 1 [Source:MGI Symbol;Acc:MGI:1289155]	8	-1.2918	0.0913046	0.863369	4.26568	3.3068
ENSMUSG00000102423	Gm37465	predicted gene, 37465 [Source:MGI Symbol;Acc:MGI:5610693]	3	-2.01045	0.0914043	0.863743	0.679601	0.338327
ENSMUSG00000058589	Anks1b	ankyrin repeat and sterile alpha motif domain containing 1B [Source:MGI Symbol;Acc:MGI:1924781]	10	-1.5377	0.0914809	0.863899	0.679774	0.442846
ENSMUSG00000027007	Itprid2	ITPR interacting domain containing 2 [Source:MGI Symbol;Acc:MGI:1917849]	2	1.20874	0.0915788	0.864256	13.8771	16.7644
ENSMUSG00000094910	D430019H16Rik	RIKEN cDNA D430019H16 gene [Source:MGI Symbol;Acc:MGI:2443127]	12	1.63857	0.0916899	0.864737	0.891981	1.46369
ENSMUSG00000032652	Crebl2	cAMP responsive element binding protein-like 2 [Source:MGI Symbol;Acc:MGI:1889385]	6	1.31999	0.0918221	0.864785	3.1327	4.12967
ENSMUSG00000045094	Arhgef37	Rho guanine nucleotide exchange factor (GEF) 37 [Source:MGI Symbol;Acc:MGI:3045339]	18	1.35338	0.0919195	0.864785	2.20852	2.99205
ENSMUSG00000025934	Gsta3	glutathione S-transferase, alpha 3 [Source:MGI Symbol;Acc:MGI:95856]	1	-3.39323	0.0919263	0.864785	0.547124	0.157836
ENSMUSG00000069808	Tlcd3a	TLC domain containing 3A [Source:MGI Symbol;Acc:MGI:2151840]	11	2.03522	0.0919673	0.864785	0.183757	0.374034
ENSMUSG00000047759	Hs3st3a1	heparan sulfate (glucosamine) 3-O-sulfotransferase 3A1 [Source:MGI Symbol;Acc:MGI:1333861]	11	-2.35377	0.0920369	0.864785	0.691097	0.295376
ENSMUSG00000031950	Gabarapl2	gamma-aminobutyric acid (GABA) A receptor-associated protein-like 2 [Source:MGI Symbol;Acc:MGI:1890602]	8	1.24019	0.092056	0.864785	18.9808	23.5217
ENSMUSG00000097885	5031434O11Rik	RIKEN cDNA 5031434O11 gene [Source:MGI Symbol;Acc:MGI:1923230]	3	-1.68889	0.092234	0.865891	1.31019	0.773694
ENSMUSG00000020300	Cpeb4	cytoplasmic polyadenylation element binding protein 4 [Source:MGI Symbol;Acc:MGI:1914829]	11	1.21095	0.0923683	0.866113	26.7501	32.3867
ENSMUSG00000029135	Fosl2	fos-like antigen 2 [Source:MGI Symbol;Acc:MGI:102858]	5	-1.18096	0.0923782	0.866113	22.367	18.938
ENSMUSG00000031844	Hsd17b2	hydroxysteroid (17-beta) dehydrogenase 2 [Source:MGI Symbol;Acc:MGI:1096386]	8	2.24271	0.0924471	0.866194	0.5069	1.13572
ENSMUSG00000061983	Rps12	ribosomal protein S12 [Source:MGI Symbol;Acc:MGI:98105]	10	1.18122	0.0925812	0.866886	125.531	148.272
ENSMUSG00000041560	Nop53	NOP53 ribosome biogenesis factor [Source:MGI Symbol;Acc:MGI:2154441]	7	1.19616	0.0929051	0.867684	29.0404	34.7373
ENSMUSG00000019944	Rhobtb1	Rho-related BTB domain containing 1 [Source:MGI Symbol;Acc:MGI:1916538]	10	-1.72084	0.0929088	0.867684	0.941368	0.543575
ENSMUSG00000030091	Nup210	nucleoporin 210 [Source:MGI Symbol;Acc:MGI:1859555]	6	-1.44926	0.0929105	0.867684	1.45796	1.00681
ENSMUSG00000102854	C130023A14Rik	RIKEN cDNA C130023A14 gene [Source:MGI Symbol;Acc:MGI:2442654]	16	-2.3309	0.0929447	0.867684	0.726731	0.315459
ENSMUSG00000023345	Poc1a	POC1 centriolar protein A [Source:MGI Symbol;Acc:MGI:1917485]	9	-1.81147	0.0930057	0.867684	1.00181	0.547145
ENSMUSG00000060678	H4c3	H4 clustered histone 3 [Source:MGI Symbol;Acc:MGI:2448421]	13	1.32907	0.0930287	0.867684	23.8822	31.7208
ENSMUSG00000030304	Ergic2	ERGIC and golgi 2 [Source:MGI Symbol;Acc:MGI:1914706]	6	-1.25289	0.0932362	0.868402	5.17211	4.13058
ENSMUSG00000034593	Myo5a	myosin VA [Source:MGI Symbol;Acc:MGI:105976]	9	-1.23614	0.0932884	0.868402	5.07894	4.10504
ENSMUSG00000016541	Atxn10	ataxin 10 [Source:MGI Symbol;Acc:MGI:1859293]	15	1.19974	0.093383	0.868402	51.6314	61.9355
ENSMUSG00000001403	Ube2c	ubiquitin-conjugating enzyme E2C [Source:MGI Symbol;Acc:MGI:1915862]	2	-1.96694	0.0934637	0.868402	1.31852	0.666838
ENSMUSG00000005893	Nr2c2	nuclear receptor subfamily 2, group C, member 2 [Source:MGI Symbol;Acc:MGI:1352466]	6	1.17687	0.09348	0.868402	5.74426	6.76039
ENSMUSG00000053931	Cnn3	calponin 3, acidic [Source:MGI Symbol;Acc:MGI:1919244]	3	1.18357	0.0936359	0.868402	303.599	359.33
ENSMUSG00000073437	D330041H03Rik	RIKEN cDNA D330041H03 gene [Source:MGI Symbol;Acc:MGI:3603827]	17	-2.05142	0.0936361	0.868402	0.548933	0.265073
ENSMUSG00000026239	Pde6d	phosphodiesterase 6D, cGMP-specific, rod, delta [Source:MGI Symbol;Acc:MGI:1270843]	1	1.31556	0.0936876	0.868402	7.62485	10.0362
ENSMUSG00000026764	Kif5c	kinesin family member 5C [Source:MGI Symbol;Acc:MGI:1098269]	2	-1.17541	0.0936924	0.868402	16.9553	14.4232
ENSMUSG00000030109	Slc6a12	solute carrier family 6 (neurotransmitter transporter, betaine/GABA), member 12 [Source:MGI Symbol;Acc:MGI:95628]	6	3.66399	0.0937098	0.868402	0.953293	3.50117
ENSMUSG00000023882	Zfp54	zinc finger protein 54 [Source:MGI Symbol;Acc:MGI:99201]	17	2.05389	0.0938285	0.868941	0.38674	0.795151
ENSMUSG00000050697	Prkaa1	protein kinase, AMP-activated, alpha 1 catalytic subunit [Source:MGI Symbol;Acc:MGI:2145955]	15	1.30975	0.093993	0.869242	4.72372	6.1803
ENSMUSG00000065118	Gm23297	predicted gene, 23297 [Source:MGI Symbol;Acc:MGI:5453074]	7	-3.04292	0.0940083	0.869242	14.0655	4.69884
ENSMUSG00000027227	Sord	sorbitol dehydrogenase [Source:MGI Symbol;Acc:MGI:98266]	2	1.2578	0.0940423	0.869242	15.8782	19.9863
ENSMUSG00000015312	Gadd45b	growth arrest and DNA-damage-inducible 45 beta [Source:MGI Symbol;Acc:MGI:107776]	10	1.39495	0.0941145	0.869278	15.1583	21.122
ENSMUSG00000105176	Gm43668	predicted gene 43668 [Source:MGI Symbol;Acc:MGI:5663805]	3	-1.68823	0.0941672	0.869278	1.00321	0.592497
ENSMUSG00000029005	Draxin	dorsal inhibitory axon guidance protein [Source:MGI Symbol;Acc:MGI:1917683]	4	1.53122	0.0942394	0.869386	0.905634	1.38611
ENSMUSG00000024331	Dsc2	desmocollin 2 [Source:MGI Symbol;Acc:MGI:103221]	18	-1.33555	0.0944725	0.870977	3.70051	2.77456
ENSMUSG00000015452	Ager	advanced glycosylation end product-specific receptor [Source:MGI Symbol;Acc:MGI:893592]	17	-1.75431	0.094639	0.871953	2.10628	1.20682
ENSMUSG00000025321	Itgb8	integrin beta 8 [Source:MGI Symbol;Acc:MGI:1338035]	12	-1.50273	0.0947463	0.872382	5.84528	3.8879
ENSMUSG00000027544	Nfatc2	nuclear factor of activated T cells, cytoplasmic, calcineurin dependent 2 [Source:MGI Symbol;Acc:MGI:102463]	2	-1.52591	0.0949079	0.872718	1.371	0.901243
ENSMUSG00000105568	Gm42971	predicted gene 42971 [Source:MGI Symbol;Acc:MGI:5663108]	3	-1.87396	0.095072	0.872718	4.05036	2.1635
ENSMUSG00000025176	Hoga1	4-hydroxy-2-oxoglutarate aldolase 1 [Source:MGI Symbol;Acc:MGI:1914682]	19	-2.17406	0.0951982	0.872718	0.927582	0.427568
ENSMUSG00000020321	Mdh1	malate dehydrogenase 1, NAD (soluble) [Source:MGI Symbol;Acc:MGI:97051]	11	1.17567	0.0952914	0.872718	41.5403	48.8377
ENSMUSG00000117430	Gm49968	predicted gene, 49968 [Source:MGI Symbol;Acc:MGI:6275235]	18	-1.93115	0.095346	0.872718	1.18184	0.607377
ENSMUSG00000021700	Rab3c	RAB3C, member RAS oncogene family [Source:MGI Symbol;Acc:MGI:1914545]	13	-2.05481	0.095429	0.872718	0.331911	0.16022
ENSMUSG00000115568	Tiaf2	TGF-beta1-induced anti-apoptotic factor 2 [Source:MGI Symbol;Acc:MGI:2651383]	15	-2.32613	0.0954531	0.872718	0.818982	0.349317
ENSMUSG00000036537	Rnf113a1	ring finger protein 113A1 [Source:MGI Symbol;Acc:MGI:1917192]	X	-1.44242	0.0956922	0.872718	10.3584	7.20045
ENSMUSG00000032497	Lrrfip2	leucine rich repeat (in FLII) interacting protein 2 [Source:MGI Symbol;Acc:MGI:1918518]	9	-1.2124	0.0958204	0.872718	11.0298	9.10275
ENSMUSG00000001555	Fkbp10	FK506 binding protein 10 [Source:MGI Symbol;Acc:MGI:104769]	11	1.20123	0.09591	0.872718	19.0593	22.9104
ENSMUSG00000100967	Gm29666	predicted gene 29666 [Source:MGI Symbol;Acc:MGI:5580372]	15	-2.1462	0.0959484	0.872718	0.194699	0.0899738
ENSMUSG00000042293	Gm5617	predicted gene 5617 [Source:MGI Symbol;Acc:MGI:3643566]	9	1.65524	0.0960369	0.872718	7.47512	12.3635
ENSMUSG00000103493	Gm37411	predicted gene, 37411 [Source:MGI Symbol;Acc:MGI:5610639]	1	-2.47862	0.0960454	0.872718	0.529145	0.205533
ENSMUSG00000006418	Rnf114	ring finger protein 114 [Source:MGI Symbol;Acc:MGI:1933159]	2	1.21372	0.0961125	0.872718	13.4826	16.3571
ENSMUSG00000063229	Ldha	lactate dehydrogenase A [Source:MGI Symbol;Acc:MGI:96759]	7	1.1912	0.096182	0.872718	89.3375	106.403
ENSMUSG00000005813	Metap1	methionyl aminopeptidase 1 [Source:MGI Symbol;Acc:MGI:1922874]	3	-1.26193	0.0962284	0.872718	4.86927	3.85412
ENSMUSG00000035686	Thrsp	thyroid hormone responsive [Source:MGI Symbol;Acc:MGI:109126]	7	1.53701	0.096382	0.872718	2.58009	3.97767
ENSMUSG00000077714	Snord17	small nucleolar RNA, C/D box 17 [Source:MGI Symbol;Acc:MGI:3819523]	2	1.61719	0.0964119	0.872718	20.4143	32.9614
ENSMUSG00000031812	Map1lc3b	microtubule-associated protein 1 light chain 3 beta [Source:MGI Symbol;Acc:MGI:1914693]	8	1.21017	0.0964157	0.872718	6.38176	7.71992
ENSMUSG00000075590	Nrbp2	nuclear receptor binding protein 2 [Source:MGI Symbol;Acc:MGI:2385017]	15	-1.2055	0.0964772	0.872718	16.9553	14.0641
ENSMUSG00000054423	Cadps	Ca2+-dependent secretion activator [Source:MGI Symbol;Acc:MGI:1350922]	14	-1.52596	0.0964902	0.872718	0.964946	0.631672
ENSMUSG00000050541	Adra1b	adrenergic receptor, alpha 1b [Source:MGI Symbol;Acc:MGI:104774]	11	-1.78165	0.0965175	0.872718	1.59342	0.895231
ENSMUSG00000112543	Gm48744	predicted gene, 48744 [Source:MGI Symbol;Acc:MGI:6098414]	10	-2.53562	0.096652	0.872718	1.7055	0.67976
ENSMUSG00000006526	Stimate	STIM activating enhancer [Source:MGI Symbol;Acc:MGI:1921500]	14	-1.38797	0.0966626	0.872718	3.05039	2.19792
ENSMUSG00000075511	1700001L05Rik	RIKEN cDNA 1700001L05 gene [Source:MGI Symbol;Acc:MGI:1916541]	15	-2.1478	0.0966696	0.872718	0.509802	0.233765
ENSMUSG00000105519	E430021H15Rik	RIKEN cDNA E430021H15 gene [Source:MGI Symbol;Acc:MGI:2444377]	5	-2.03348	0.0967102	0.872718	0.643082	0.313236
ENSMUSG00000048756	Foxo3	forkhead box O3 [Source:MGI Symbol;Acc:MGI:1890081]	10	1.20238	0.0967374	0.872718	23.712	28.517
ENSMUSG00000029504	Ddx51	DEAD box helicase 51 [Source:MGI Symbol;Acc:MGI:1916913]	5	-1.42973	0.0967643	0.872718	2.6916	1.8827
ENSMUSG00000034755	Pcdh11x	protocadherin 11 X-linked [Source:MGI Symbol;Acc:MGI:2442849]	X	6.8585	0.096832	0.872718	0.0521036	0.362052
ENSMUSG00000103373	Gm37238	predicted gene, 37238 [Source:MGI Symbol;Acc:MGI:5610466]	13	-1.90476	0.0968366	0.872718	1.79059	0.941643
ENSMUSG00000113918	Gm6566	predicted gene 6566 [Source:MGI Symbol;Acc:MGI:3647745]	12	-2.71158	0.0968524	0.872718	1.0834	0.388466
ENSMUSG00000106859	Gm42737	predicted gene 42737 [Source:MGI Symbol;Acc:MGI:5662874]	5	-2.50016	0.0969455	0.872718	0.780409	0.310076
ENSMUSG00000019892	Lrriq1	leucine-rich repeats and IQ motif containing 1 [Source:MGI Symbol;Acc:MGI:1922228]	10	2.60506	0.0970391	0.872718	0.0782588	0.207284
ENSMUSG00000050071	Bex1	brain expressed X-linked 1 [Source:MGI Symbol;Acc:MGI:1328321]	X	1.38727	0.0970851	0.872718	9.44805	13.0989
ENSMUSG00000022339	Ebag9	estrogen receptor-binding fragment-associated gene 9 [Source:MGI Symbol;Acc:MGI:1859920]	15	1.31439	0.0971234	0.872718	7.68237	10.0884
ENSMUSG00000044715	Gskip	GSK3B interacting protein [Source:MGI Symbol;Acc:MGI:1914037]	12	-1.48134	0.0971702	0.872718	2.03783	1.37347
ENSMUSG00000039914	Coq10a	coenzyme Q10A [Source:MGI Symbol;Acc:MGI:2684847]	10	-1.55014	0.0972037	0.872718	4.00798	2.5773
ENSMUSG00000030731	Syt3	synaptotagmin III [Source:MGI Symbol;Acc:MGI:99665]	7	1.58056	0.0972236	0.872718	1.42711	2.265
ENSMUSG00000003429	Rps11	ribosomal protein S11 [Source:MGI Symbol;Acc:MGI:1351329]	7	1.17432	0.0973006	0.872718	110.665	129.975
ENSMUSG00000006241	Ccdc159	coiled-coil domain containing 159 [Source:MGI Symbol;Acc:MGI:1914369]	9	-1.84474	0.0973601	0.872718	1.47298	0.792799
ENSMUSG00000063810	Alms1	ALMS1, centrosome and basal body associated [Source:MGI Symbol;Acc:MGI:1934606]	6	-1.25824	0.0973777	0.872718	1.86368	1.47991
ENSMUSG00000056553	Ptprn2	protein tyrosine phosphatase, receptor type, N polypeptide 2 [Source:MGI Symbol;Acc:MGI:107418]	12	-1.94216	0.097661	0.872718	0.678947	0.349658
ENSMUSG00000092624	Gm3654	predicted gene 3654 [Source:MGI Symbol;Acc:MGI:3781830]	7	1.96482	0.0976855	0.872718	1.32898	2.60729
ENSMUSG00000019699	Akt3	thymoma viral proto-oncogene 3 [Source:MGI Symbol;Acc:MGI:1345147]	1	1.17347	0.0977734	0.872718	27.5688	32.3558
ENSMUSG00000022967	Ifnar1	interferon (alpha and beta) receptor 1 [Source:MGI Symbol;Acc:MGI:107658]	16	1.2501	0.0978345	0.872718	6.3807	7.968
ENSMUSG00000009555	Cdk9	cyclin-dependent kinase 9 (CDC2-related kinase) [Source:MGI Symbol;Acc:MGI:1328368]	2	1.22821	0.0978617	0.872718	7.64641	9.38905
ENSMUSG00000021023	Prorp	protein only RNase P catalytic subunit [Source:MGI Symbol;Acc:MGI:1913382]	12	1.58705	0.0980426	0.872718	1.18615	1.87896
ENSMUSG00000048878	Hexim1	hexamethylene bis-acetamide inducible 1 [Source:MGI Symbol;Acc:MGI:2385923]	11	1.24732	0.098045	0.872718	15.3381	19.1163
ENSMUSG00000030124	Lag3	lymphocyte-activation gene 3 [Source:MGI Symbol;Acc:MGI:106588]	6	2.34393	0.0980544	0.872718	0.344053	0.812838
ENSMUSG00000034300	Fam53c	family with sequence similarity 53, member C [Source:MGI Symbol;Acc:MGI:1913556]	18	1.2187	0.0981887	0.872718	13.3926	16.3176
ENSMUSG00000001034	Mapk7	mitogen-activated protein kinase 7 [Source:MGI Symbol;Acc:MGI:1346347]	11	-1.31912	0.0982412	0.872718	5.43949	4.12751
ENSMUSG00000072770	Acrbp	proacrosin binding protein [Source:MGI Symbol;Acc:MGI:1859515]	6	-2.27628	0.0983079	0.872718	0.659031	0.292183
ENSMUSG00000059326	Csf2ra	colony stimulating factor 2 receptor, alpha, low-affinity (granulocyte-macrophage) [Source:MGI Symbol;Acc:MGI:1339754]	19	-1.2593	0.098315	0.872718	10.9572	8.70519
ENSMUSG00000034282	Evpl	envoplakin [Source:MGI Symbol;Acc:MGI:107507]	11	1.46251	0.0983216	0.872718	10.8663	15.8868
ENSMUSG00000071757	Zhx2	zinc fingers and homeoboxes 2 [Source:MGI Symbol;Acc:MGI:2683087]	15	1.19623	0.0983678	0.872718	19.2897	23.0666
ENSMUSG00000047459	Dynlrb1	dynein light chain roadblock-type 1 [Source:MGI Symbol;Acc:MGI:1914318]	2	1.24321	0.0984493	0.872718	36.352	45.2106
ENSMUSG00000035246	Pcyt1b	phosphate cytidylyltransferase 1, choline, beta isoform [Source:MGI Symbol;Acc:MGI:2147987]	X	1.20835	0.0985892	0.872718	12.8035	15.4652
ENSMUSG00000055835	Zfp1	zinc finger protein 1 [Source:MGI Symbol;Acc:MGI:99154]	8	-1.42626	0.0988333	0.872718	6.0277	4.2141
ENSMUSG00000030850	Ate1	arginyltransferase 1 [Source:MGI Symbol;Acc:MGI:1333870]	7	-1.23024	0.098895	0.872718	9.3097	7.57494
ENSMUSG00000013367	Iglon5	IgLON family member 5 [Source:MGI Symbol;Acc:MGI:2686277]	7	-2.24178	0.0989221	0.872718	1.1626	0.510682
ENSMUSG00000008301	Phax	phosphorylated adaptor for RNA export [Source:MGI Symbol;Acc:MGI:1891839]	18	1.24123	0.0989339	0.872718	13.2183	16.4132
ENSMUSG00000004896	Rrnad1	ribosomal RNA adenine dimethylase domain containing 1 [Source:MGI Symbol;Acc:MGI:2387197]	3	-1.47538	0.0989353	0.872718	1.88721	1.28212
ENSMUSG00000091155	Serpine3	serpin peptidase inhibitor, clade E (nexin, plasminogen activator inhibitor type 1), member 3 [Source:MGI Symbol;Acc:MGI:2442020]	14	13.6192	0.0989783	0.872718	0.654052	9.00437
ENSMUSG00000069662	Marcks	myristoylated alanine rich protein kinase C substrate [Source:MGI Symbol;Acc:MGI:96907]	10	-1.17647	0.0990053	0.872718	25.5967	21.7585
ENSMUSG00000028189	Ctbs	chitobiase [Source:MGI Symbol;Acc:MGI:1921495]	3	1.42289	0.0990229	0.872718	1.3981	1.99327
ENSMUSG00000020524	Gria1	glutamate receptor, ionotropic, AMPA1 (alpha 1) [Source:MGI Symbol;Acc:MGI:95808]	11	-1.97199	0.0990956	0.872718	1.23018	0.623252
ENSMUSG00000034427	Myo15b	myosin XVB [Source:MGI Symbol;Acc:MGI:2685534]	11	-2.15689	0.0991191	0.872718	0.132166	0.0609475
ENSMUSG00000117775	Gm50462	predicted gene, 50462 [Source:MGI Symbol;Acc:MGI:6324728]	18	2.18423	0.0992895	0.872718	0.25728	0.564043
ENSMUSG00000003623	Crot	carnitine O-octanoyltransferase [Source:MGI Symbol;Acc:MGI:1921364]	5	1.34549	0.0993299	0.872718	2.79184	3.76265
ENSMUSG00000067889	Sptbn2	spectrin beta, non-erythrocytic 2 [Source:MGI Symbol;Acc:MGI:1313261]	19	-1.20092	0.0993342	0.872718	117.103	97.5141
ENSMUSG00000032959	Pebp1	phosphatidylethanolamine binding protein 1 [Source:MGI Symbol;Acc:MGI:1344408]	5	1.18178	0.0994076	0.872718	65.659	77.6017
ENSMUSG00000028673	Fuca1	fucosidase, alpha-L- 1, tissue [Source:MGI Symbol;Acc:MGI:95593]	4	1.19828	0.0994195	0.872718	16.3654	19.6064
ENSMUSG00000059586	Nsmce2	NSE2/MMS21 homolog, SMC5-SMC6 complex SUMO ligase [Source:MGI Symbol;Acc:MGI:1915751]	15	1.34699	0.099449	0.872718	3.85571	5.19983
ENSMUSG00000117648	Gm32282	predicted gene, 32282 [Source:MGI Symbol;Acc:MGI:5591441]	17	2.26201	0.0994738	0.872718	1.95312	4.45231
ENSMUSG00000026433	Rab29	RAB29, member RAS oncogene family [Source:MGI Symbol;Acc:MGI:2385107]	1	1.55301	0.0994952	0.872718	3.29112	5.12188
ENSMUSG00000033991	Ttc37	tetratricopeptide repeat domain 37 [Source:MGI Symbol;Acc:MGI:2679923]	13	-1.32704	0.099511	0.872718	1.67204	1.2614
ENSMUSG00000020029	Nudt4	nudix (nucleoside diphosphate linked moiety X)-type motif 4 [Source:MGI Symbol;Acc:MGI:1918457]	10	1.2471	0.0995894	0.872718	205.105	255.798
ENSMUSG00000032172	Olfm2	olfactomedin 2 [Source:MGI Symbol;Acc:MGI:3045350]	9	-2.7715	0.0996206	0.872718	0.510467	0.183957
ENSMUSG00000037348	Paqr7	progestin and adipoQ receptor family member VII [Source:MGI Symbol;Acc:MGI:1919154]	4	1.23974	0.0996627	0.872718	8.21939	10.1962
ENSMUSG00000026319	Relch	RAB11 binding and LisH domain, coiled-coil and HEAT repeat containing [Source:MGI Symbol;Acc:MGI:1922832]	1	-1.22775	0.0996782	0.872718	4.75761	3.87759
ENSMUSG00000036309	Skp1	S-phase kinase-associated protein 1 [Source:MGI Symbol;Acc:MGI:103575]	11	1.1815	0.099701	0.872718	79.6981	94.1721
ENSMUSG00000036057	Ptpn23	protein tyrosine phosphatase, non-receptor type 23 [Source:MGI Symbol;Acc:MGI:2144837]	9	-1.17334	0.0998322	0.87291	17.8837	15.2389
ENSMUSG00000042377	Fam83g	family with sequence similarity 83, member G [Source:MGI Symbol;Acc:MGI:1916890]	11	-2.05244	0.0998765	0.87291	0.408643	0.197166
ENSMUSG00000025525	Apool	apolipoprotein O-like [Source:MGI Symbol;Acc:MGI:1915367]	X	1.57329	0.0999846	0.87291	1.52726	2.4043
ENSMUSG00000039298	Cdk5rap2	CDK5 regulatory subunit associated protein 2 [Source:MGI Symbol;Acc:MGI:2384875]	4	1.18871	0.100038	0.87291	5.05218	6.00725
ENSMUSG00000022718	Dgcr8	DGCR8, microprocessor complex subunit [Source:MGI Symbol;Acc:MGI:2151114]	16	-1.31554	0.100081	0.87291	2.75581	2.09128
ENSMUSG00000000320	Alox12	arachidonate 12-lipoxygenase [Source:MGI Symbol;Acc:MGI:87998]	11	-1.65715	0.100105	0.87291	1.31274	0.789537
ENSMUSG00000042684	Npl	N-acetylneuraminate pyruvate lyase [Source:MGI Symbol;Acc:MGI:1921341]	1	1.22719	0.100225	0.87291	21.2684	26.0957
ENSMUSG00000039756	Dnttip2	deoxynucleotidyltransferase, terminal, interacting protein 2 [Source:MGI Symbol;Acc:MGI:1923173]	3	1.22404	0.100254	0.87291	15.8566	19.4009
ENSMUSG00000020521	Rnft1	ring finger protein, transmembrane 1 [Source:MGI Symbol;Acc:MGI:1924142]	11	-1.50596	0.100281	0.87291	1.85364	1.23034
ENSMUSG00000006494	Pdk1	pyruvate dehydrogenase kinase, isoenzyme 1 [Source:MGI Symbol;Acc:MGI:1926119]	2	1.20454	0.10033	0.87291	6.85743	8.25986
ENSMUSG00000019194	Scn1b	sodium channel, voltage-gated, type I, beta [Source:MGI Symbol;Acc:MGI:98247]	7	-2.07985	0.100421	0.873174	1.22856	0.592579
ENSMUSG00000026664	Phyh	phytanoyl-CoA hydroxylase [Source:MGI Symbol;Acc:MGI:891978]	2	1.2729	0.100566	0.873622	16.0482	20.4215
ENSMUSG00000037940	Inpp4b	inositol polyphosphate-4-phosphatase, type II [Source:MGI Symbol;Acc:MGI:2158925]	8	-2.034	0.100615	0.873622	0.281313	0.137022
ENSMUSG00000075600	Zc3h3	zinc finger CCCH type containing 3 [Source:MGI Symbol;Acc:MGI:2663721]	15	-1.42505	0.100685	0.873622	3.52402	2.47459
ENSMUSG00000027300	Ubox5	U box domain containing 5 [Source:MGI Symbol;Acc:MGI:2154658]	2	-1.64748	0.100716	0.873622	1.6968	1.03426
ENSMUSG00000114193	Gm48139	predicted gene, 48139 [Source:MGI Symbol;Acc:MGI:6097504]	13	-2.03705	0.10103	0.875194	0.788072	0.381539
ENSMUSG00000006575	Rundc3a	RUN domain containing 3A [Source:MGI Symbol;Acc:MGI:1858752]	11	-1.61724	0.101105	0.875194	2.01129	1.24035
ENSMUSG00000045761	Togaram2	TOG array regulator of axonemal microtubules 2 [Source:MGI Symbol;Acc:MGI:2443498]	17	-2.75117	0.101125	0.875194	0.286121	0.103362
ENSMUSG00000018599	Mief2	mitochondrial elongation factor 2 [Source:MGI Symbol;Acc:MGI:2144199]	11	1.40101	0.101152	0.875194	3.38984	4.7448
ENSMUSG00000103558	Gm38220	predicted gene, 38220 [Source:MGI Symbol;Acc:MGI:5611448]	17	-2.15306	0.101202	0.875194	1.49597	0.68189
ENSMUSG00000022893	Adamts1	a disintegrin-like and metallopeptidase (reprolysin type) with thrombospondin type 1 motif, 1 [Source:MGI Symbol;Acc:MGI:109249]	16	-1.33974	0.101408	0.875556	24.6867	18.428
ENSMUSG00000054477	Kcnn2	potassium intermediate/small conductance calcium-activated channel, subfamily N, member 2 [Source:MGI Symbol;Acc:MGI:2153182]	18	-2.59188	0.101462	0.875556	0.311535	0.120754
ENSMUSG00000035666	Gtf3c4	general transcription factor IIIC, polypeptide 4 [Source:MGI Symbol;Acc:MGI:2138937]	2	1.21796	0.101605	0.875556	5.28612	6.43779
ENSMUSG00000036561	Ppp6r2	protein phosphatase 6, regulatory subunit 2 [Source:MGI Symbol;Acc:MGI:1918724]	15	-1.22651	0.101615	0.875556	5.25	4.27618
ENSMUSG00000033849	B3galt2	UDP-Gal:betaGlcNAc beta 1,3-galactosyltransferase, polypeptide 2 [Source:MGI Symbol;Acc:MGI:1349461]	1	-2.186	0.101672	0.875556	0.307742	0.140357
ENSMUSG00000001998	Ap4e1	adaptor-related protein complex AP-4, epsilon 1 [Source:MGI Symbol;Acc:MGI:1336993]	2	-1.40168	0.101695	0.875556	1.57848	1.12359
ENSMUSG00000037938	Chchd5	coiled-coil-helix-coiled-coil-helix domain containing 5 [Source:MGI Symbol;Acc:MGI:1913420]	2	1.49754	0.101697	0.875556	3.01269	4.51121
ENSMUSG00000050777	Tmem37	transmembrane protein 37 [Source:MGI Symbol;Acc:MGI:2157899]	1	1.32418	0.101731	0.875556	14.6413	19.3931
ENSMUSG00000032041	Tirap	toll-interleukin 1 receptor (TIR) domain-containing adaptor protein [Source:MGI Symbol;Acc:MGI:2152213]	9	-1.43283	0.101835	0.87593	2.11263	1.47156
ENSMUSG00000069631	Strada	STE20-related kinase adaptor alpha [Source:MGI Symbol;Acc:MGI:1919399]	11	-1.5634	0.101947	0.876365	1.57683	1.00224
ENSMUSG00000032350	Gclc	glutamate-cysteine ligase, catalytic subunit [Source:MGI Symbol;Acc:MGI:104990]	9	-1.22625	0.102067	0.876875	27.5378	22.4785
ENSMUSG00000031608	Galnt7	polypeptide N-acetylgalactosaminyltransferase 7 [Source:MGI Symbol;Acc:MGI:1349449]	8	1.33187	0.102144	0.877008	3.06505	4.07599
ENSMUSG00000001334	Fndc5	fibronectin type III domain containing 5 [Source:MGI Symbol;Acc:MGI:1917614]	4	2.18261	0.102231	0.87723	0.441819	0.97097
ENSMUSG00000104271	Gm37891	predicted gene, 37891 [Source:MGI Symbol;Acc:MGI:5611119]	2	-2.32562	0.102446	0.877447	1.06038	0.438068
ENSMUSG00000030057	Cnbp	cellular nucleic acid binding protein [Source:MGI Symbol;Acc:MGI:88431]	6	1.17969	0.102461	0.877447	72.7722	85.8438
ENSMUSG00000108689	Gm45354	predicted gene 45354 [Source:MGI Symbol;Acc:MGI:5791190]	3	-2.00608	0.102543	0.877447	0.608174	0.297704
ENSMUSG00000029073	Cptp	ceramide-1-phosphate transfer protein [Source:MGI Symbol;Acc:MGI:1933107]	4	1.55152	0.102577	0.877447	1.46961	2.28389
ENSMUSG00000085882	2610507I01Rik	RIKEN cDNA 2610507I01 gene [Source:MGI Symbol;Acc:MGI:1919453]	11	-2.5145	0.102617	0.877447	1.99936	0.803484
ENSMUSG00000040867	Begain	brain-enriched guanylate kinase-associated [Source:MGI Symbol;Acc:MGI:3044626]	12	-1.96539	0.102622	0.877447	0.867751	0.441297
ENSMUSG00000057388	Mrpl18	mitochondrial ribosomal protein L18 [Source:MGI Symbol;Acc:MGI:1914931]	17	1.26218	0.102836	0.878755	16.4598	20.7858
ENSMUSG00000031904	Slc7a6	solute carrier family 7 (cationic amino acid transporter, y+ system), member 6 [Source:MGI Symbol;Acc:MGI:2142598]	8	-1.24584	0.103211	0.88078	7.50472	6.02447
ENSMUSG00000090722	Gm8378	predicted gene 8378 [Source:MGI Symbol;Acc:MGI:3646777]	12	-1.9698	0.103252	0.88078	1.01874	0.518869
ENSMUSG00000036478	Btg1	BTG anti-proliferation factor 1 [Source:MGI Symbol;Acc:MGI:88215]	10	1.20989	0.103269	0.88078	45.6331	55.2163
ENSMUSG00000034220	Gpc1	glypican 1 [Source:MGI Symbol;Acc:MGI:1194891]	1	-1.21617	0.103348	0.88078	13.8492	11.3914
ENSMUSG00000029687	Ezh2	enhancer of zeste 2 polycomb repressive complex 2 subunit [Source:MGI Symbol;Acc:MGI:107940]	6	1.41615	0.103403	0.88078	1.60276	2.26808
ENSMUSG00000039021	Ttc16	tetratricopeptide repeat domain 16 [Source:MGI Symbol;Acc:MGI:2443048]	2	-2.22233	0.103538	0.88078	0.254696	0.111347
ENSMUSG00000109125	Gm45159	predicted gene 45159 [Source:MGI Symbol;Acc:MGI:5753735]	7	-1.71963	0.103561	0.88078	0.219768	0.127482
ENSMUSG00000024019	Cmtr1	cap methyltransferase 1 [Source:MGI Symbol;Acc:MGI:1921407]	17	-1.521	0.10366	0.88078	0.877686	0.575545
ENSMUSG00000028630	Dyrk2	dual-specificity tyrosine-(Y)-phosphorylation regulated kinase 2 [Source:MGI Symbol;Acc:MGI:1330301]	10	1.17543	0.103738	0.88078	20.5787	24.1842
ENSMUSG00000039395	Mreg	melanoregulin [Source:MGI Symbol;Acc:MGI:2151839]	1	-2.03639	0.10396	0.88078	1.77489	0.871921
ENSMUSG00000027067	Ssrp1	structure specific recognition protein 1 [Source:MGI Symbol;Acc:MGI:107912]	2	1.1898	0.104002	0.88078	18.0039	21.412
ENSMUSG00000074623	Gm826	predicted gene 826 [Source:MGI Symbol;Acc:MGI:2685672]	2	-2.30406	0.104048	0.88078	1.53939	0.654653
ENSMUSG00000053398	Phgdh	3-phosphoglycerate dehydrogenase [Source:MGI Symbol;Acc:MGI:1355330]	3	1.18631	0.104122	0.88078	155.264	184.183
ENSMUSG00000032123	Dpagt1	dolichyl-phosphate (UDP-N-acetylglucosamine) acetylglucosaminephosphotransferase 1 (GlcNAc-1-P transferase) [Source:MGI Symbol;Acc:MGI:1196396]	9	-1.47787	0.104306	0.88078	2.40787	1.62639
ENSMUSG00000026797	Stxbp1	syntaxin binding protein 1 [Source:MGI Symbol;Acc:MGI:107363]	2	-1.25922	0.104373	0.88078	13.7142	10.8787
ENSMUSG00000020802	Ube2o	ubiquitin-conjugating enzyme E2O [Source:MGI Symbol;Acc:MGI:2444266]	11	1.19259	0.104474	0.88078	16.4261	19.5899
ENSMUSG00000057982	Zfp809	zinc finger protein 809 [Source:MGI Symbol;Acc:MGI:2143362]	9	1.45673	0.104557	0.88078	2.93038	4.27211
ENSMUSG00000031633	Slc25a4	solute carrier family 25 (mitochondrial carrier, adenine nucleotide translocator), member 4 [Source:MGI Symbol;Acc:MGI:1353495]	8	1.17955	0.104601	0.88078	155.54	183.477
ENSMUSG00000027349	Fam98b	family with sequence similarity 98, member B [Source:MGI Symbol;Acc:MGI:1915465]	2	1.28754	0.10463	0.88078	5.77734	7.43011
ENSMUSG00000020018	Snrpf	small nuclear ribonucleoprotein polypeptide F [Source:MGI Symbol;Acc:MGI:1917128]	10	1.22237	0.104688	0.88078	43.4496	53.1455
ENSMUSG00000044475	Ascc1	activating signal cointegrator 1 complex subunit 1 [Source:MGI Symbol;Acc:MGI:1916340]	10	1.27975	0.1048	0.88078	9.21672	11.7963
ENSMUSG00000050945	Zfp438	zinc finger protein 438 [Source:MGI Symbol;Acc:MGI:2444919]	18	1.36258	0.104825	0.88078	2.82972	3.85247
ENSMUSG00000022136	Dnajc3	DnaJ heat shock protein family (Hsp40) member C3 [Source:MGI Symbol;Acc:MGI:107373]	14	1.17083	0.104881	0.88078	24.3316	28.4871
ENSMUSG00000030199	Etv6	ets variant 6 [Source:MGI Symbol;Acc:MGI:109336]	6	-1.19271	0.104891	0.88078	15.4749	12.9738
ENSMUSG00000030814	Bcl7c	B cell CLL/lymphoma 7C [Source:MGI Symbol;Acc:MGI:1332237]	7	1.23672	0.104989	0.88078	4.37136	5.40868
ENSMUSG00000014547	Wdfy2	WD repeat and FYVE domain containing 2 [Source:MGI Symbol;Acc:MGI:2442811]	14	-1.3492	0.105081	0.88078	2.80301	2.07991
ENSMUSG00000029076	Sdf4	stromal cell derived factor 4 [Source:MGI Symbol;Acc:MGI:108079]	4	1.18032	0.105118	0.88078	32.5002	38.3577
ENSMUSG00000024747	Aldh1a7	aldehyde dehydrogenase family 1, subfamily A7 [Source:MGI Symbol;Acc:MGI:1347050]	19	1.32806	0.105143	0.88078	21.6128	28.7155
ENSMUSG00000022150	Dab2	disabled 2, mitogen-responsive phosphoprotein [Source:MGI Symbol;Acc:MGI:109175]	15	1.63503	0.105164	0.88078	0.679963	1.11236
ENSMUSG00000003190	Bcl2l12	BCL2-like 12 (proline rich) [Source:MGI Symbol;Acc:MGI:1922986]	7	-1.85981	0.105185	0.88078	1.82718	0.970704
ENSMUSG00000051978	Erich1	glutamate rich 1 [Source:MGI Symbol;Acc:MGI:3588201]	8	1.36014	0.105225	0.88078	8.59796	11.6973
ENSMUSG00000111104	Gm8512	predicted gene 8512 [Source:MGI Symbol;Acc:MGI:3648240]	10	-3.4353	0.105482	0.88078	7.66271	2.22524
ENSMUSG00000113380	Gm48682	predicted gene, 48682 [Source:MGI Symbol;Acc:MGI:6098306]	13	-2.14365	0.105599	0.88078	1.96841	0.924682
ENSMUSG00000054520	Sh3bp2	SH3-domain binding protein 2 [Source:MGI Symbol;Acc:MGI:1346349]	5	-1.66164	0.105686	0.88078	2.00581	1.20344
ENSMUSG00000034263	Ints14	integrator complex subunit 14 [Source:MGI Symbol;Acc:MGI:1917132]	9	1.34873	0.105689	0.88078	4.7091	6.35409
ENSMUSG00000073791	Efcab7	EF-hand calcium binding domain 7 [Source:MGI Symbol;Acc:MGI:2385199]	4	1.83992	0.105707	0.88078	0.838682	1.54613
ENSMUSG00000006395	Hyi	hydroxypyruvate isomerase (putative) [Source:MGI Symbol;Acc:MGI:1915430]	4	-1.30699	0.10575	0.88078	11.1229	8.50897
ENSMUSG00000044783	Hjurp	Holliday junction recognition protein [Source:MGI Symbol;Acc:MGI:2685821]	1	1.33711	0.105804	0.88078	1.74632	2.33346
ENSMUSG00000018102	H2bc4	H2B clustered histone 4 [Source:MGI Symbol;Acc:MGI:1915274]	13	1.2217	0.105849	0.88078	34.447	42.0533
ENSMUSG00000053334	Ficd	FIC domain containing [Source:MGI Symbol;Acc:MGI:1098550]	5	1.39959	0.1059	0.88078	3.10755	4.35214
ENSMUSG00000017466	Timp2	tissue inhibitor of metalloproteinase 2 [Source:MGI Symbol;Acc:MGI:98753]	11	1.17769	0.105902	0.88078	132.941	156.561
ENSMUSG00000062044	Lmtk3	lemur tyrosine kinase 3 [Source:MGI Symbol;Acc:MGI:3039582]	7	-1.34461	0.105908	0.88078	3.56391	2.65372
ENSMUSG00000102357	Gm38348	predicted gene, 38348 [Source:MGI Symbol;Acc:MGI:5611576]	2	-2.75629	0.105909	0.88078	0.637388	0.231629
ENSMUSG00000018899	Irf1	interferon regulatory factor 1 [Source:MGI Symbol;Acc:MGI:96590]	11	1.71839	0.105937	0.88078	6.33152	10.8768
ENSMUSG00000032252	Glce	glucuronyl C5-epimerase [Source:MGI Symbol;Acc:MGI:2136405]	9	1.28238	0.106061	0.88078	11.0826	14.2053
ENSMUSG00000036390	Gadd45a	growth arrest and DNA-damage-inducible 45 alpha [Source:MGI Symbol;Acc:MGI:107799]	6	-1.34066	0.106081	0.88078	14.8977	11.1243
ENSMUSG00000006010	Odr4	odr4 GPCR localization factor homolog [Source:MGI Symbol;Acc:MGI:2385108]	1	-1.24808	0.106268	0.88078	10.2663	8.22817
ENSMUSG00000104583	Gm42701	predicted gene 42701 [Source:MGI Symbol;Acc:MGI:5662838]	3	-2.36859	0.106341	0.88078	0.785207	0.331878
ENSMUSG00000050619	Zscan29	zinc finger SCAN domains 29 [Source:MGI Symbol;Acc:MGI:2139317]	2	1.33626	0.106422	0.88078	1.89243	2.52852
ENSMUSG00000046718	Bst2	bone marrow stromal cell antigen 2 [Source:MGI Symbol;Acc:MGI:1916800]	8	2.35021	0.10644	0.88078	0.73062	1.72858
ENSMUSG00000097768	2310043M15Rik	RIKEN cDNA 2310043M15 gene [Source:MGI Symbol;Acc:MGI:1919180]	16	1.37926	0.106488	0.88078	12.7634	17.5988
ENSMUSG00000040370	Etfrf1	electron transfer flavoprotein regulatory factor 1 [Source:MGI Symbol;Acc:MGI:1914886]	6	1.33204	0.106645	0.88078	4.73239	6.30402
ENSMUSG00000029186	Pi4k2b	phosphatidylinositol 4-kinase type 2 beta [Source:MGI Symbol;Acc:MGI:1914323]	5	-1.37799	0.106656	0.88078	5.167	3.759
ENSMUSG00000024330	Col11a2	collagen, type XI, alpha 2 [Source:MGI Symbol;Acc:MGI:88447]	17	-1.51986	0.106666	0.88078	1.09731	0.720005
ENSMUSG00000052906	Ubxn8	UBX domain protein 8 [Source:MGI Symbol;Acc:MGI:1337129]	8	1.35547	0.106734	0.88078	4.21909	5.71687
ENSMUSG00000103948	4930594C11Rik	RIKEN cDNA 4930594C11 gene [Source:MGI Symbol;Acc:MGI:1924883]	1	-2.29489	0.106744	0.88078	0.482206	0.210835
ENSMUSG00000059070	Rpl18	ribosomal protein L18 [Source:MGI Symbol;Acc:MGI:98003]	7	1.17285	0.106902	0.88078	38.1567	44.7629
ENSMUSG00000020272	Stk10	serine/threonine kinase 10 [Source:MGI Symbol;Acc:MGI:1099439]	11	1.24611	0.106968	0.88078	8.44205	10.5152
ENSMUSG00000108772	Gm6063	predicted gene 6063 [Source:MGI Symbol;Acc:MGI:3645395]	6	2.20639	0.106983	0.88078	1.29556	2.88751
ENSMUSG00000004568	Arhgef18	rho/rac guanine nucleotide exchange factor (GEF) 18 [Source:MGI Symbol;Acc:MGI:2142567]	8	1.21745	0.106988	0.88078	4.39969	5.35216
ENSMUSG00000020492	Ska2	spindle and kinetochore associated complex subunit 2 [Source:MGI Symbol;Acc:MGI:1913390]	11	1.33631	0.107206	0.88078	3.9159	5.2405
ENSMUSG00000025225	Nfkb2	nuclear factor of kappa light polypeptide gene enhancer in B cells 2, p49/p100 [Source:MGI Symbol;Acc:MGI:1099800]	19	-1.33396	0.107229	0.88078	5.61483	4.21805
ENSMUSG00000000751	Rpa1	replication protein A1 [Source:MGI Symbol;Acc:MGI:1915525]	11	1.17861	0.107279	0.88078	15.2685	17.9966
ENSMUSG00000115222	Gm49747	predicted gene, 49747 [Source:MGI Symbol;Acc:MGI:6215240]	14	-2.21431	0.107356	0.88078	0.84827	0.376294
ENSMUSG00000102503	Gm37370	predicted gene, 37370 [Source:MGI Symbol;Acc:MGI:5610598]	1	-1.81463	0.107456	0.88078	2.00089	1.09636
ENSMUSG00000097209	AU022754	expressed sequence AU022754 [Source:MGI Symbol;Acc:MGI:2146143]	15	-1.60701	0.107493	0.88078	2.45788	1.53766
ENSMUSG00000043088	Il17re	interleukin 17 receptor E [Source:MGI Symbol;Acc:MGI:1889371]	6	1.68013	0.107522	0.88078	0.7156	1.20045
ENSMUSG00000053877	Srcap	Snf2-related CREBBP activator protein [Source:MGI Symbol;Acc:MGI:2444036]	7	-1.33211	0.107533	0.88078	1.26728	0.952954
ENSMUSG00000050627	Gpd1l	glycerol-3-phosphate dehydrogenase 1-like [Source:MGI Symbol;Acc:MGI:1289257]	9	1.30011	0.107683	0.88078	5.52155	7.17895
ENSMUSG00000039903	Eva1c	eva-1 homolog C (C. elegans) [Source:MGI Symbol;Acc:MGI:1918217]	16	-1.71717	0.107709	0.88078	1.39687	0.814888
ENSMUSG00000022912	Pros1	protein S (alpha) [Source:MGI Symbol;Acc:MGI:1095733]	16	-1.26595	0.107757	0.88078	10.3654	8.20159
ENSMUSG00000058298	Mcm9	minichromosome maintenance 9 homologous recombination repair factor [Source:MGI Symbol;Acc:MGI:1918817]	10	-1.29398	0.107936	0.88078	2.7237	2.10043
ENSMUSG00000031788	Kifc3	kinesin family member C3 [Source:MGI Symbol;Acc:MGI:109202]	8	1.33574	0.10796	0.88078	2.39635	3.19721
ENSMUSG00000027257	Pacsin3	protein kinase C and casein kinase substrate in neurons 3 [Source:MGI Symbol;Acc:MGI:1891410]	2	1.26002	0.108033	0.88078	6.53571	8.24407
ENSMUSG00000085037	4933421O10Rik	RIKEN cDNA 4933421O10 gene [Source:MGI Symbol;Acc:MGI:1918323]	4	-1.51578	0.10807	0.88078	2.04234	1.34639
ENSMUSG00000078970	Wdr92	WD repeat domain 92 [Source:MGI Symbol;Acc:MGI:2144224]	11	1.62497	0.108096	0.88078	1.23408	2.00229
ENSMUSG00000026356	Dars	aspartyl-tRNA synthetase [Source:MGI Symbol;Acc:MGI:2442544]	1	-1.2056	0.108132	0.88078	14.1848	11.7622
ENSMUSG00000109429	Gm45223	predicted gene 45223 [Source:MGI Symbol;Acc:MGI:5753799]	7	-1.69434	0.108139	0.88078	0.746593	0.442054
ENSMUSG00000031403	Dkc1	dyskeratosis congenita 1, dyskerin [Source:MGI Symbol;Acc:MGI:1861727]	X	1.27985	0.108234	0.88078	5.70795	7.30806
ENSMUSG00000044763	Trmt10c	tRNA methyltransferase 10C, mitochondrial RNase P subunit [Source:MGI Symbol;Acc:MGI:1196261]	16	-1.44771	0.108327	0.88078	3.91454	2.70036
ENSMUSG00000008348	Ubc	ubiquitin C [Source:MGI Symbol;Acc:MGI:98889]	5	1.23363	0.108452	0.88078	16.9486	20.8934
ENSMUSG00000026988	Wdsub1	WD repeat, SAM and U-box domain containing 1 [Source:MGI Symbol;Acc:MGI:1919387]	2	1.2898	0.108473	0.88078	5.50771	7.10093
ENSMUSG00000021113	Snapc1	small nuclear RNA activating complex, polypeptide 1 [Source:MGI Symbol;Acc:MGI:1922877]	12	1.24896	0.108537	0.88078	3.16594	3.95834
ENSMUSG00000055531	Cpsf6	cleavage and polyadenylation specific factor 6 [Source:MGI Symbol;Acc:MGI:1913948]	10	-1.18034	0.108544	0.88078	9.14874	7.75115
ENSMUSG00000006235	Epor	erythropoietin receptor [Source:MGI Symbol;Acc:MGI:95408]	9	2.09381	0.108569	0.88078	0.609879	1.29015
ENSMUSG00000028999	Rint1	RAD50 interactor 1 [Source:MGI Symbol;Acc:MGI:1916233]	5	1.30349	0.108704	0.88078	2.18739	2.85116
ENSMUSG00000048755	Mcat	malonyl CoA:ACP acyltransferase (mitochondrial) [Source:MGI Symbol;Acc:MGI:2388651]	15	1.50851	0.108728	0.88078	1.81837	2.74876
ENSMUSG00000045538	Ddx28	DEAD box helicase 28 [Source:MGI Symbol;Acc:MGI:1919236]	8	-1.49588	0.108738	0.88078	3.53813	2.36117
ENSMUSG00000006784	Odad4	outer dynein arm complex subunit 4 [Source:MGI Symbol;Acc:MGI:1921657]	11	-2.12753	0.108761	0.88078	0.465891	0.215962
ENSMUSG00000028879	Stx12	syntaxin 12 [Source:MGI Symbol;Acc:MGI:1931027]	4	1.19642	0.108781	0.88078	16.9776	20.3142
ENSMUSG00000105742	Gm42748	predicted gene 42748 [Source:MGI Symbol;Acc:MGI:5662885]	5	-1.87049	0.10883	0.88078	1.21145	0.646003
ENSMUSG00000025352	Gdf11	growth differentiation factor 11 [Source:MGI Symbol;Acc:MGI:1338027]	10	1.2268	0.108837	0.88078	7.95701	9.75857
ENSMUSG00000106057	Gm43560	predicted gene 43560 [Source:MGI Symbol;Acc:MGI:5663697]	3	-2.2381	0.10887	0.88078	1.89917	0.834926
ENSMUSG00000001065	Zfp276	zinc finger protein (C2H2 type) 276 [Source:MGI Symbol;Acc:MGI:1888495]	8	-1.38983	0.108922	0.88078	2.65835	1.9146
ENSMUSG00000106211	Gm42842	predicted gene 42842 [Source:MGI Symbol;Acc:MGI:5662979]	3	-2.12992	0.109038	0.88078	0.629648	0.290194
ENSMUSG00000040859	Bsdc1	BSD domain containing 1 [Source:MGI Symbol;Acc:MGI:1913466]	4	1.2096	0.109041	0.88078	9.52538	11.5279
ENSMUSG00000106870	Gm43681	predicted gene 43681 [Source:MGI Symbol;Acc:MGI:5663818]	5	-2.64034	0.109044	0.88078	0.872355	0.331252
ENSMUSG00000042759	Apobr	apolipoprotein B receptor [Source:MGI Symbol;Acc:MGI:2176230]	7	2.01542	0.109079	0.88078	0.280532	0.569558
ENSMUSG00000105395	Gm42672	predicted gene 42672 [Source:MGI Symbol;Acc:MGI:5662809]	3	-2.13849	0.109147	0.880835	5.75833	2.68625
ENSMUSG00000001783	Rtcb	RNA 2',3'-cyclic phosphate and 5'-OH ligase [Source:MGI Symbol;Acc:MGI:106379]	10	1.18573	0.109225	0.880975	31.8029	37.7273
ENSMUSG00000047515	BC049715	cDNA sequence BC049715 [Source:MGI Symbol;Acc:MGI:3605234]	6	-1.95065	0.10934	0.881336	0.335116	0.169655
ENSMUSG00000049562	Ap5b1	adaptor-related protein complex 5, beta 1 subunit [Source:MGI Symbol;Acc:MGI:2685808]	19	1.62492	0.109424	0.881336	1.41182	2.28762
ENSMUSG00000026313	Hdac4	histone deacetylase 4 [Source:MGI Symbol;Acc:MGI:3036234]	1	-1.24305	0.10949	0.881336	8.43619	6.79141
ENSMUSG00000079414	Gm11110	predicted gene 11110 [Source:MGI Symbol;Acc:MGI:3779362]	17	1.82295	0.109545	0.881336	0.707513	1.29569
ENSMUSG00000001158	Snrnp27	small nuclear ribonucleoprotein 27 (U4/U6.U5) [Source:MGI Symbol;Acc:MGI:1913868]	6	1.27071	0.109577	0.881336	10.7219	13.6287
ENSMUSG00000089917	Uckl1	uridine-cytidine kinase 1-like 1 [Source:MGI Symbol;Acc:MGI:1915806]	2	-1.45455	0.109651	0.881416	2.97492	2.04669
ENSMUSG00000106432	Gm43259	predicted gene 43259 [Source:MGI Symbol;Acc:MGI:5663396]	3	-1.80188	0.109709	0.881416	0.903312	0.500605
ENSMUSG00000028444	Cntfr	ciliary neurotrophic factor receptor [Source:MGI Symbol;Acc:MGI:99605]	4	-1.24986	0.10978	0.881494	13.9023	11.1234
ENSMUSG00000042129	Rassf4	Ras association (RalGDS/AF-6) domain family member 4 [Source:MGI Symbol;Acc:MGI:2386853]	6	1.43427	0.110095	0.882719	0.860112	1.23521
ENSMUSG00000037149	Ddx1	DEAD box helicase 1 [Source:MGI Symbol;Acc:MGI:2144727]	12	1.1728	0.110234	0.882719	22.0815	25.8987
ENSMUSG00000064181	Rab3ip	RAB3A interacting protein [Source:MGI Symbol;Acc:MGI:105933]	10	1.20268	0.110238	0.882719	16.8158	20.2256
ENSMUSG00000113515	Gm29675	predicted gene, 29675 [Source:MGI Symbol;Acc:MGI:5588834]	13	-2.21512	0.110287	0.882719	0.239885	0.107953
ENSMUSG00000030519	Apba2	amyloid beta (A4) precursor protein-binding, family A, member 2 [Source:MGI Symbol;Acc:MGI:1261791]	7	-2.2909	0.110297	0.882719	0.542683	0.237207
ENSMUSG00000107205	Gm42576	predicted gene 42576 [Source:MGI Symbol;Acc:MGI:5662713]	5	-1.96887	0.110376	0.882719	0.994773	0.499065
ENSMUSG00000063687	Pcdhb5	protocadherin beta 5 [Source:MGI Symbol;Acc:MGI:2136739]	18	-2.48866	0.110384	0.882719	0.423706	0.172193
ENSMUSG00000097431	Gm26782	predicted gene, 26782 [Source:MGI Symbol;Acc:MGI:5477276]	14	1.51208	0.110424	0.882719	1.80256	2.72726
ENSMUSG00000078902	Gm14443	predicted gene 14443 [Source:MGI Symbol;Acc:MGI:3652324]	2	-1.74638	0.11053	0.88289	1.41479	0.813513
ENSMUSG00000021484	Lman2	lectin, mannose-binding 2 [Source:MGI Symbol;Acc:MGI:1914140]	13	1.19283	0.110708	0.88289	7.66524	9.14259
ENSMUSG00000036766	Dner	delta/notch-like EGF repeat containing [Source:MGI Symbol;Acc:MGI:2152889]	1	-1.27653	0.110757	0.88289	6.18254	4.84627
ENSMUSG00000038736	Nudcd1	NudC domain containing 1 [Source:MGI Symbol;Acc:MGI:1914679]	15	1.35103	0.11083	0.88289	0.796362	1.07616
ENSMUSG00000004031	Brinp2	bone morphogenic protein/retinoic acid inducible neural-specific 2 [Source:MGI Symbol;Acc:MGI:2443333]	1	2.08605	0.110892	0.88289	0.0818294	0.172145
ENSMUSG00000028578	Caap1	caspase activity and apoptosis inhibitor 1 [Source:MGI Symbol;Acc:MGI:1915020]	4	1.44018	0.110901	0.88289	2.36781	3.41313
ENSMUSG00000025371	Chmp6	charged multivesicular body protein 6 [Source:MGI Symbol;Acc:MGI:3583942]	11	1.32019	0.111018	0.88289	5.93188	7.82906
ENSMUSG00000022051	Bnip3l	BCL2/adenovirus E1B interacting protein 3-like [Source:MGI Symbol;Acc:MGI:1332659]	14	1.17589	0.111073	0.88289	98.1828	115.462
ENSMUSG00000030671	Pde3b	phosphodiesterase 3B, cGMP-inhibited [Source:MGI Symbol;Acc:MGI:1333863]	7	-1.37144	0.111109	0.88289	2.24166	1.63925
ENSMUSG00000112229	Gm48086	predicted gene, 48086 [Source:MGI Symbol;Acc:MGI:6097426]	10	-1.9589	0.111114	0.88289	0.786397	0.401194
[truncated: 12,565 more rows]

## Sheet: Statistically Significant
gene_id	SYMBOL	DESCRIPTION	SEQNAME	Fold_Change	PValue	FDR	WT_0H_Avg_FPKM	E1_0H_Avg_FPKM
[truncated: 59 more rows]

[truncated: 1 more sheets: Biologically Significant]
