# Supplementary material for: The Immediate Early Response of Lens Epithelial Cells to Lens Injury
Source: Cells. 2022 Nov 1;11(21):3456. doi: 10.3390/cells11213456 (PMC9654717; doi:10.3390/cells11213456)
Supplement: Supplementary file 1 [file cells-11-03456-s001.zip › Supplemental Table S5.xlsx]

## Sheet: Data Description
	Analysis Overview
	This spreadsheet is part of a study investingating the transcriptomic consequences of the conditional deletion of either Egr1 or FosB on the lens epithelial cell injury response. It sumarizes the results of a pairwise contrast between Egr1 null mouse lens epithelial cells (E1_6H) and wildtype LEC (WT_6H) profiled at six hours after mechanical injury. Positive fold changes indicate increased expre…
	Worksheet Specification
	Worksheet	Description
	Data Description	Describes each worksheet, provides analysis overview and define column headers for data sheets
	Raw_Counts	Counts associated with all Ensembl 104 GTF features for all samples included in this contrast
	All Present Genes	All genes measured in this experiment
	Statistically Significant	All gene differentially expressed with an absolute fold change > 2 and an FDR less than 0.05
	Biologically Significant	All genes meeting criteria for biologically significant differential expression
	Biological Significance Criteria used to identify statistically and biologically significant genes Jiang J, Shihan MH, Wang Y, Duncan MK. Invest Ophthalmol Vis Sci. 2018;59(12):4986-4997. Manthey AL, Terrell AM, Lachke SA, Polson SW, Duncan MK. Genom Data. 2014;2:369-374.
	Criterion			Implementation
	Statistical significance			filter( abs(logFC) > 1 and FDR < 0.05)
	"a change in mRNA level greater than 2 FPKM"			abs(average(FPKM-Condition1) - average(FPKM-Condition2) ) > 2
	"expression level in either condition is 2 FPKM or greater"			abs(average(FPKM-Condition1)) > 2 OR abs(average(FPKM-Condition1) > 2
	Egr1 Null LEC vs Wildtype LEC 6 hours post injury
	criteria	Total	Up	Down
	Statistically Significant	115	72	43
	Biologically Significant	73	52	21
	Column Header Specification: Raw_Counts
	1 (A)	gene_id		the ensembl id of this feature
	2 (B)	SYMBOL		The symbol of the gene associated with this feature
	3 (C)	DESCRIPTION		The long-form, descriptive name of this gene from Ensembl v104
	4 (D)	SEQNAME		The name of the squence (Chromosome or contig) where this gene is located
	5 (E)	eu_length		The exon-union length of this genomic feature
	6 (F)	eu_gc		The fractional GC content of this feature
	7 (F) through 12 (K)	Sample Labels (WT_6H_1 through E1_6H_3)		Count observed for this feature in the indicated sample
	Column Header Specification: All Present Genes, Statistically Significant, Biologically Significant
	Column number (Workbook Letter)	Header		Description
	1 (A)	gene_id		the ensembl id of this feature
	2 (B)	SYMBOL		The symbol of the gene associated with this feature
	3 (C)	DESCRIPTION		The long-form, descriptive name of this gene from Ensembl v104
	4 (D)	SEQNAME		The name of the squence (Chromosome or contig) where this gene is located
	5 (E)	Fold_Change		The fold change of this gene between E1_6H and WT_6H in Lens Epithelium
	6 (F)	p_value		P_Value calculated by edgeR (E1_6H vs WT_6H)
	7 (G)	FDR		Adjusted p value reported by edgeR (E1_6H vs WT_6H)
	8 (H)	WT_6H_Avg_FPKM		Abundance of this gene (Average FPKM) observed in WT_6H
	9 (I)	E1_6H_Avg_FPKM		Abundance of this gene (Average FPKM) observed in E1_6H
	Red points indicate genes with zero counts in one group

## Sheet: Raw_Counts
gene_id	SYMBOL	DESCRIPTION	SEQNAME	eu_length	eu_gc	WT_6H_1	WT_6H_2	WT_6H_3	E1_6H_1	E1_6H_2	E1_6H_3
ENSMUSG00002074905			10	69	0.681159	0	0	0	0	0	0
ENSMUSG00002076002			17	110	0.545455	0	0	0	0	0	0
ENSMUSG00002075266			12	75	0.413333	0	0	0	0	0	0
ENSMUSG00002076008			11	145	0.62069	0	0	0	0	0	0
ENSMUSG00002074908			2	110	0.627273	0	0	3	0	1	0
ENSMUSG00002074899			GL456372.1	121	0.479339	0	0	0	0	0	0
ENSMUSG00002074901			1	141	0.432624	0	0	0	0	0	0
ENSMUSG00002075999			3	100	0.47	0	0	0	0	0	0
ENSMUSG00002074903			14	76	0.486842	0	0	0	0	0	0
ENSMUSG00002074904			2	140	0.6	5	0	0	0	3	0
ENSMUSG00002075282			X	93	0.44086	1	0	0	0	0	0
ENSMUSG00002074910			1	102	0.5	0	0	0	0	0	0
ENSMUSG00002076364			X	71	0.338028	0	0	0	0	0	0
ENSMUSG00002074921			16	96	0.416667	0	0	0	0	0	0
ENSMUSG00002074922			7	460	0.46087	1	0	0	0	1	0
ENSMUSG00000095475			JH584299.1	1446	0.482711	0	0	0	0	0	0
ENSMUSG00002074928			X	205	0.614634	3	0	0	0	0	0
ENSMUSG00002075293			3	110	0.518182	0	0	0	0	0	0
ENSMUSG00002076006			7	76	0.447368	0	8	0	0	0	0
ENSMUSG00002074931			2	131	0.51145	0	0	0	0	0	0
ENSMUSG00002074919			Y	110	0.609091	0	0	0	0	0	0
ENSMUSG00002074920			2	96	0.614583	0	0	0	0	0	0
ENSMUSG00002074917			4	72	0.597222	0	0	0	0	0	0
ENSMUSG00002074935			2	136	0.507353	8	13	15	5	27	18
ENSMUSG00002076029			17	76	0.5	1	0	0	0	0	0
ENSMUSG00002074924			6	102	0.343137	0	0	0	0	0	0
ENSMUSG00002074934			2	93	0.505376	0	0	0	0	0	0
ENSMUSG00002075290			13	150	0.6	0	0	0	0	0	0
ENSMUSG00002074940			19	104	0.413462	0	0	0	0	0	0
ENSMUSG00002074941			11	56	0.875	4	0	0	0	6	0
ENSMUSG00002074942			5	142	0.65493	0	0	0	0	0	0
ENSMUSG00002074943			2	124	0.435484	0	1	0	1	0	11
ENSMUSG00002076037			7	79	0.43038	0	0	0	0	0	0
ENSMUSG00002076038			18	119	0.546218	0	0	0	0	0	0
ENSMUSG00002074946			15	74	0.540541	0	0	0	0	0	0
ENSMUSG00002074947			7	120	0.55	0	0	0	0	0	0
ENSMUSG00002074948			14	110	0.627273	0	0	0	0	0	0
ENSMUSG00002075313			16	110	0.618182	0	0	0	0	0	0
ENSMUSG00002076043			1	442	0.255656	0	0	0	0	0	0
ENSMUSG00000047383		novel transcript	1	878	0.383827	0	0	0	0	0	0
ENSMUSG00002076032			8	101	0.49505	0	0	0	0	0	0
ENSMUSG00002074953			14	93	0.344086	0	0	0	0	0	0
ENSMUSG00002075318			18	70	0.357143	0	0	0	0	0	0
ENSMUSG00002075319			3	110	0.572727	0	0	0	0	0	0
ENSMUSG00002076009			16	129	0.418605	0	0	0	0	0	0
ENSMUSG00000094172			JH584299.1	1446	0.472337	0	0	0	0	0	0
ENSMUSG00002075686			8	94	0.478723	0	0	0	0	0	0
ENSMUSG00002075323			2	101	0.386139	0	0	0	0	0	0
ENSMUSG00002076417			14	107	0.420561	0	0	0	0	0	0
ENSMUSG00002074961			6	137	0.59854	0	0	0	0	0	0
ENSMUSG00002074962			2	188	0.351064	0	1	3	7	0	0
ENSMUSG00002074923			7	108	0.453704	0	0	0	0	0	0
ENSMUSG00002076057			1	138	0.797101	0	0	0	0	0	0
ENSMUSG00002074912			1	96	0.416667	0	0	0	0	0	0
ENSMUSG00002076059			7	121	0.495868	0	0	0	0	0	0
ENSMUSG00002074927			7	92	0.423913	0	0	0	0	0	0
ENSMUSG00002076061			7	76	0.302632	0	0	0	0	0	0
ENSMUSG00002074969			19	56	0.732143	4	6	3	6	5	0
ENSMUSG00002074970			GL456385.1	101	0.50495	0	0	0	0	2	0
ENSMUSG00002074971			8	95	0.421053	0	0	0	0	0	0
ENSMUSG00002074932			12	97	0.536082	0	0	0	0	0	0
ENSMUSG00002074933			5	78	0.576923	0	0	0	0	0	0
ENSMUSG00002074974			Y	110	0.618182	0	0	0	0	0	0
ENSMUSG00002074975			19	82	0.560976	0	0	0	0	0	0
ENSMUSG00000106759		vomeronasal 2, receptor, pseudogene 28	5	744	0.409946	0	0	0	0	0	0
ENSMUSG00002074937			8	107	0.682243	0	0	1	0	1	0
ENSMUSG00002074938			9	77	0.584416	0	0	0	0	0	0
ENSMUSG00002074979			6	110	0.581818	0	0	0	0	0	0
ENSMUSG00002076073			1	89	0.449438	0	0	0	0	0	0
ENSMUSG00002074981			10	97	0.546392	0	0	0	0	0	0
ENSMUSG00002076075			2	127	0.385827	0	0	0	0	0	0
ENSMUSG00002074983			4	101	0.376238	0	0	0	0	0	0
ENSMUSG00002076077			5	46	0.5	0	0	0	0	0	0
ENSMUSG00002076078			19	66	0.318182	0	0	0	0	0	0
ENSMUSG00002074986			6	99	0.474747	0	0	0	0	0	0
ENSMUSG00002074987			10	77	0.350649	0	0	0	0	0	0
ENSMUSG00002076081			11	78	0.461538	0	0	0	0	0	0
ENSMUSG00002075353			16	121	0.487603	0	0	0	0	0	0
ENSMUSG00002074990			1	110	0.554545	2	0	0	0	0	0
ENSMUSG00002076084			17	193	0.440415	0	1	0	0	3	1
ENSMUSG00002076085			13	67	0.402985	0	0	0	0	0	0
ENSMUSG00002074993			17	84	0.52381	0	0	0	0	1	0
ENSMUSG00002074994			15	86	0.581395	0	0	0	0	0	0
ENSMUSG00002076088			X	85	0.388235	0	0	0	0	0	0
ENSMUSG00002074956			2	187	0.411765	0	0	0	0	0	0
ENSMUSG00002076090			16	151	0.463576	0	0	0	0	0	0
ENSMUSG00002076091			12	78	0.666667	0	0	0	0	0	0
ENSMUSG00002074999			4	125	0.592	0	0	0	0	0	0
ENSMUSG00002075000			12	79	0.56962	0	0	0	0	0	0
ENSMUSG00002075001			11	71	0.859155	0	0	0	0	0	0
ENSMUSG00002075366			13	94	0.574468	0	0	0	0	0	0
ENSMUSG00002074963			7	110	0.563636	0	0	0	0	0	0
ENSMUSG00002075004			1	126	0.571429	0	0	0	0	0	0
ENSMUSG00002076098			8	190	0.442105	0	0	0	0	0	0
ENSMUSG00002075006			7	121	0.495868	0	0	0	0	0	0
ENSMUSG00002076060			7	110	0.6	0	0	0	0	0	0
ENSMUSG00002075008			18	118	0.372881	0	0	1	0	0	0
ENSMUSG00002075009			3	76	0.434211	0	0	0	0	0	0
ENSMUSG00002075010			12	110	0.618182	0	0	0	0	0	0
ENSMUSG00002075011			15	126	0.555556	0	0	0	0	0	0
ENSMUSG00002075012			3	100	0.45	0	0	0	0	0	0
ENSMUSG00002076106			4	126	0.579365	0	0	0	0	0	0
ENSMUSG00002076107			1	70	0.557143	0	0	0	0	0	0
ENSMUSG00002076108			4	96	0.5625	0	0	0	0	0	0
ENSMUSG00002075016			18	63	0.761905	0	0	0	0	0	0
ENSMUSG00002075017			10	155	0.406452	0	0	0	0	2	0
ENSMUSG00002075018			13	119	0.420168	0	0	0	0	0	0
ENSMUSG00002075019			10	104	0.519231	0	0	0	0	0	0
ENSMUSG00002075020			7	101	0.49505	0	0	0	0	0	0
ENSMUSG00002075021			3	121	0.495868	0	0	0	0	0	0
ENSMUSG00002075022			X	56	0.446429	0	0	0	0	0	0
ENSMUSG00002075023			3	110	0.618182	0	0	0	0	0	0
ENSMUSG00002075024			2	78	0.551282	0	0	0	0	0	0
ENSMUSG00002075025			1	110	0.563636	0	0	0	0	0	0
ENSMUSG00002075026			11	77	0.558442	0	0	0	0	9	0
ENSMUSG00002075027			3	74	0.5	0	0	0	0	0	0
ENSMUSG00002075028			2	233	0.55794	0	0	0	0	0	0
ENSMUSG00002076122			6	77	0.506494	1	0	0	0	0	2
ENSMUSG00002075030			17	86	0.383721	1	3	3	3	0	3
ENSMUSG00002075031			2	103	0.359223	0	0	0	0	0	0
ENSMUSG00002076004			17	90	0.244444	2	2	3	0	1	6
ENSMUSG00002075033			2	126	0.579365	0	0	0	0	0	0
ENSMUSG00002075034			2	126	0.595238	0	0	0	0	0	0
ENSMUSG00002075035			7	208	0.331731	0	0	0	0	0	0
ENSMUSG00002075400			GL456239.1	98	0.44898	0	0	0	0	0	0
ENSMUSG00002076130			13	108	0.296296	0	0	0	0	0	0
ENSMUSG00002075038			7	107	0.682243	0	0	0	0	0	0
ENSMUSG00002075403			13	129	0.643411	0	0	0	0	0	0
ENSMUSG00002076133			X	69	0.434783	0	0	0	0	0	0
ENSMUSG00000119162			16	133	0.481203	0	0	0	0	0	0
ENSMUSG00000118636		EF-hand calcium binding domain 10 (EFCAB10) pseudogene	5	239	0.414226	0	0	0	0	0	0
ENSMUSG00002076136			2	91	0.296703	0	0	0	0	0	0
ENSMUSG00002076137			14	110	0.563636	0	0	0	0	0	0
ENSMUSG00002075045			13	138	0.637681	0	0	0	0	0	0
ENSMUSG00002075046			10	83	0.590361	0	0	0	0	0	0
ENSMUSG00002075047			3	129	0.612403	0	0	0	0	0	0
ENSMUSG00002075048			5	114	0.350877	0	0	0	0	0	0
ENSMUSG00002075049			16	110	0.572727	0	0	0	0	0	0
ENSMUSG00002075050			9	121	0.495868	0	0	0	0	0	0
ENSMUSG00002074930			5	361	0.584488	0	0	0	0	0	0
ENSMUSG00002075052			8	101	0.50495	3	0	1	11	6	0
ENSMUSG00000118648		cytochrome P450, family 2, subfamily b like pseudgene	7	60	0.516667	0	0	0	0	0	0
ENSMUSG00002075054			19	125	0.424	0	0	0	0	0	0
ENSMUSG00002075055			2	104	0.317308	0	0	0	0	0	0
ENSMUSG00002075420			14	85	0.317647	0	0	0	0	0	0
ENSMUSG00002075057			X	83	0.518072	0	0	0	0	0	0
ENSMUSG00002075058			12	123	0.463415	1	0	0	0	0	2
ENSMUSG00002075059			3	128	0.5	0	0	0	0	0	0
ENSMUSG00002075060			15	86	0.546512	0	0	0	0	0	0
ENSMUSG00002076154			17	126	0.579365	0	0	0	0	0	0
ENSMUSG00002075062			4	149	0.52349	0	0	0	0	0	0
ENSMUSG00002075063			17	110	0.554545	0	0	0	0	0	0
ENSMUSG00002076157			7	110	0.572727	0	0	0	0	0	0
ENSMUSG00002076158			7	119	0.336134	0	0	0	0	0	0
ENSMUSG00002075066			5	85	0.4	0	0	0	0	0	0
ENSMUSG00002076160			3	94	0.62766	0	0	7	3	0	0
ENSMUSG00002075068			8	98	0.612245	6	0	0	0	0	0
ENSMUSG00002075069			4	110	0.572727	0	0	0	0	0	0
ENSMUSG00000118666		Zinc finger protein 932 (Zfp932) pseudogene	13	1567	0.374601	0	0	0	0	0	0
ENSMUSG00002076164			5	109	0.302752	0	0	0	0	0	0
ENSMUSG00002074951			1	127	0.480315	0	0	0	0	0	0
ENSMUSG00002074952			12	101	0.386139	0	0	0	0	0	0
ENSMUSG00000118670		mucin 19	15	22800	0.594167	0	0	0	0	0	0
ENSMUSG00002075075			11	123	0.536585	24	2	4	1	3	8
ENSMUSG00002075076			1	106	0.528302	0	0	0	0	0	0
ENSMUSG00002075077			1	57	0.701754	0	0	0	0	0	0
ENSMUSG00002076171			4	126	0.571429	0	0	0	0	0	0
ENSMUSG00002075079			15	140	0.492857	0	0	0	0	0	0
ENSMUSG00002076173			16	57	0.736842	3517	3955	2380	5842	5020	5049
ENSMUSG00002075081			9	123	0.341463	0	0	0	0	0	0
ENSMUSG00002076903			8	86	0.348837	0	0	0	0	0	0
ENSMUSG00002075083			2	96	0.59375	0	0	0	0	0	0
ENSMUSG00002075084			4	106	0.462264	0	0	0	0	0	0
ENSMUSG00002075085			2	111	0.36036	0	0	0	0	7	0
ENSMUSG00002076179			1	72	0.361111	0	0	0	0	0	0
ENSMUSG00002075451			4	121	0.495868	0	0	0	0	0	0
ENSMUSG00002075452			17	94	0.287234	0	0	0	0	0	0
ENSMUSG00002075089			12	103	0.475728	0	2	0	1	0	0
ENSMUSG00002076183			6	104	0.298077	0	0	2	0	0	0
ENSMUSG00002076184			6	126	0.603175	2	0	2	2	0	1
ENSMUSG00002075092			16	121	0.495868	0	0	0	0	0	0
ENSMUSG00002074972			13	91	0.472527	0	0	0	0	0	0
ENSMUSG00002075094			X	81	0.407407	0	4	0	0	0	0
ENSMUSG00002075095			1	62	0.645161	0	0	0	0	0	0
ENSMUSG00002076189			1	164	0.347561	0	0	0	0	0	6
ENSMUSG00002076190			12	91	0.604396	0	0	0	0	0	0
ENSMUSG00002074977			18	106	0.103774	0	0	0	0	0	0
ENSMUSG00002074978			3	114	0.570175	0	0	0	0	0	0
ENSMUSG00002076193			11	127	0.559055	0	0	0	0	0	0
ENSMUSG00002075101			18	82	0.621951	0	0	0	0	0	0
ENSMUSG00002075102			6	354	0.485876	0	3	0	0	0	0
ENSMUSG00002075103			2	82	0.487805	0	0	0	0	0	0
ENSMUSG00002075104			13	127	0.637795	0	0	0	0	0	0
ENSMUSG00002075105			18	91	0.505495	0	0	0	0	0	0
ENSMUSG00002076199			2	122	0.672131	0	0	0	0	0	0
ENSMUSG00000118719			8	132	0.477273	0	0	0	0	0	0
ENSMUSG00002075108			8	102	0.5	0	0	0	0	0	0
ENSMUSG00002075109			2	143	0.636364	0	0	0	0	0	0
ENSMUSG00002076566			7	90	0.588889	0	0	0	0	0	0
ENSMUSG00002075111			7	90	0.433333	0	0	0	0	0	0
ENSMUSG00002075112			X	109	0.568807	0	0	0	0	0	0
ENSMUSG00002075113			13	138	0.666667	0	0	0	0	0	0
ENSMUSG00000118728			9	72	0.416667	0	0	0	0	0	0
ENSMUSG00002075115			2	125	0.576	0	0	0	0	0	0
ENSMUSG00002076209			4	121	0.495868	0	0	0	0	0	0
ENSMUSG00002076089			16	66	0.409091	0	0	0	0	0	0
ENSMUSG00002075118			12	78	0.525641	0	0	0	0	0	0
ENSMUSG00002075119			1	134	0.477612	0	0	0	0	0	0
ENSMUSG00002076213			12	112	0.455357	0	0	0	0	0	0
ENSMUSG00002076214			13	91	0.274725	0	0	0	0	0	0
ENSMUSG00002075122			10	109	0.623853	0	0	0	0	1	0
ENSMUSG00002075123			16	71	0.521127	0	0	0	0	0	0
ENSMUSG00002076096			X	110	0.381818	0	0	0	0	0	0
ENSMUSG00002075125			19	119	0.336134	0	0	0	0	0	0
ENSMUSG00002076219			5	122	0.442623	4	0	0	0	0	0
ENSMUSG00002075127			7	110	0.545455	0	0	0	0	0	0
ENSMUSG00002075128			8	122	0.590164	0	0	4	0	0	0
ENSMUSG00002075129			12	114	0.561404	0	0	0	0	0	0
ENSMUSG00002075130			X	123	0.471545	0	0	0	0	0	0
ENSMUSG00002075131			9	120	0.408333	0	0	0	0	0	0
ENSMUSG00002075132			8	140	0.485714	9	7	8	0	8	11
ENSMUSG00002075133			7	110	0.627273	0	0	0	0	0	0
ENSMUSG00002075134			7	96	0.53125	0	0	0	0	0	0
ENSMUSG00002076956			2	127	0.401575	0	0	0	0	0	0
ENSMUSG00002075136			18	111	0.45045	0	0	0	0	0	0
ENSMUSG00002076230			7	101	0.49505	0	0	0	0	0	0
ENSMUSG00002075138			10	94	0.521277	0	0	0	0	0	0
ENSMUSG00002076232			2	86	0.453488	0	0	0	0	0	0
ENSMUSG00002075140			2	108	0.388889	0	0	0	0	0	0
ENSMUSG00002075141			2	82	0.439024	1	1	8	0	0	0
ENSMUSG00002075506			8	79	0.43038	0	0	0	0	0	0
ENSMUSG00002075143			2	121	0.371901	0	0	0	0	0	0
ENSMUSG00002075144			16	70	0.6	0	0	0	0	0	0
ENSMUSG00002075145			10	109	0.477064	0	0	0	0	0	0
ENSMUSG00002076239			4	125	0.584	0	0	0	0	5	0
ENSMUSG00002076240			17	102	0.5	0	0	0	0	0	0
ENSMUSG00002075148			14	107	0.672897	0	0	0	0	0	0
ENSMUSG00000118778			17	88	0.443182	0	0	0	0	0	0
ENSMUSG00002075150			12	77	0.558442	0	0	0	0	0	0
ENSMUSG00002075151			9	184	0.61413	0	0	4	0	0	0
ENSMUSG00002075152			8	63	0.301587	0	0	0	0	0	0
ENSMUSG00002076125			2	125	0.592	0	0	0	0	0	0
ENSMUSG00002076247			10	99	0.393939	2	1	0	0	0	0
ENSMUSG00002075155			3	119	0.420168	0	0	0	0	0	0
ENSMUSG00000110493		olfactory receptor 841, pseudogene 1	9	848	0.376179	0	0	0	0	0	0
ENSMUSG00002075157			7	78	0.397436	0	0	4	0	0	0
ENSMUSG00002075158			14	126	0.587302	0	0	0	0	0	0
ENSMUSG00002075159			2	127	0.393701	0	0	11	0	0	0
ENSMUSG00002076253			1	83	0.373494	0	0	0	0	0	0
ENSMUSG00002075889			13	80	0.5	0	0	0	0	0	0
ENSMUSG00002075162			2	114	0.333333	0	0	0	0	0	0
ENSMUSG00002076256			X	124	0.403226	0	0	0	0	0	0
ENSMUSG00002075164			3	272	0.547794	0	0	0	0	0	0
ENSMUSG00002075165			1	98	0.479592	0	0	0	0	0	0
ENSMUSG00000118018		novel transcript	18	3704	0.37527	1	5	13	0	5	1
ENSMUSG00002076260			7	98	0.438776	5	1	0	0	0	0
ENSMUSG00002075168			6	62	0.419355	2	0	0	0	0	0
ENSMUSG00002075169			15	109	0.623853	0	0	0	0	0	0
ENSMUSG00002076263			2	126	0.579365	0	0	0	0	0	0
ENSMUSG00002075171			10	76	0.407895	0	0	0	0	0	0
ENSMUSG00002076144			2	121	0.421488	0	0	0	0	0	0
ENSMUSG00002075173			3	214	0.593458	0	0	0	0	0	0
ENSMUSG00002076267			X	86	0.395349	0	0	0	0	0	0
ENSMUSG00002076268			14	86	0.476744	0	7	0	0	0	0
ENSMUSG00002075176			10	126	0.571429	2	3	0	0	5	0
ENSMUSG00002075177			2	90	0.388889	0	0	0	0	0	0
ENSMUSG00002075178			2	127	0.393701	0	0	0	0	0	0
ENSMUSG00002076272			5	144	0.506944	0	0	0	0	0	0
ENSMUSG00002075180			3	141	0.64539	0	1	5	0	2	0
ENSMUSG00002076274			7	88	0.579545	1	0	0	0	1	0
ENSMUSG00002075182			13	107	0.570093	0	0	0	0	0	0
ENSMUSG00000111781		olfactory receptor 939, pseudogene 1	9	766	0.369452	0	0	0	0	0	0
ENSMUSG00002075184			13	110	0.554545	0	0	0	0	0	0
ENSMUSG00002075185			13	125	0.56	0	0	3	4	0	0
ENSMUSG00002075550			1	110	0.572727	0	0	0	0	0	0
ENSMUSG00002076280			1	89	0.325843	1	0	3	0	3	4
ENSMUSG00002075188			4	57	0.736842	0	0	0	0	0	0
ENSMUSG00002076282			X	126	0.579365	0	0	0	0	0	0
ENSMUSG00002075190			2	122	0.368852	0	0	0	0	0	0
ENSMUSG00002075191			8	175	0.445714	0	0	0	0	0	0
ENSMUSG00002075192			17	174	0.431034	0	0	0	0	0	0
ENSMUSG00002075072			8	125	0.536	0	0	0	0	0	0
ENSMUSG00002075073			17	121	0.495868	0	0	0	0	0	0
ENSMUSG00002075559			7	70	0.5	8	3	0	0	0	0
ENSMUSG00002075196			6	83	0.493976	0	0	0	0	0	0
ENSMUSG00002075197			9	123	0.373984	0	0	0	0	0	0
ENSMUSG00000116563		novel protein	2	180	0.455556	0	0	0	0	0	0
ENSMUSG00002075199			16	117	0.376068	0	0	0	0	0	0
ENSMUSG00002075564			5	79	0.468354	0	0	0	0	0	0
ENSMUSG00002075201			2	121	0.413223	0	0	0	0	0	0
ENSMUSG00002075202			10	111	0.423423	0	0	0	0	0	0
ENSMUSG00002076296			2	126	0.404762	0	0	0	0	0	0
ENSMUSG00002075204			3	110	0.627273	0	0	0	0	0	0
ENSMUSG00002076298			3	121	0.479339	1	1	0	2	1	0
ENSMUSG00002076299			13	138	0.666667	0	0	0	0	4	0
ENSMUSG00002075207			17	92	0.576087	0	0	0	0	0	0
ENSMUSG00002075208			2	458	0.399563	0	0	0	0	0	0
ENSMUSG00002076302			6	184	0.472826	0	0	0	9	4	7
ENSMUSG00002075574			14	114	0.263158	0	0	0	0	0	0
ENSMUSG00002075211			7	110	0.563636	2	0	0	0	0	0
ENSMUSG00002075212			6	207	0.318841	0	0	0	0	0	0
ENSMUSG00002075213			1	121	0.495868	0	0	0	0	0	0
ENSMUSG00002075214			7	70	0.571429	0	0	0	0	0	5
ENSMUSG00002075215			9	125	0.56	3	4	1	0	0	0
ENSMUSG00002075216			4	76	0.671053	0	0	0	0	0	0
ENSMUSG00002075217			7	95	0.421053	0	0	0	0	0	0
ENSMUSG00002075218			13	97	0.309278	0	0	0	0	0	0
ENSMUSG00002076312			X	88	0.375	0	0	0	0	0	0
ENSMUSG00002076313			11	81	0.555556	0	0	0	0	0	0
ENSMUSG00002075585			6	132	0.325758	0	0	0	0	0	0
ENSMUSG00002075222			4	77	0.636364	0	0	0	0	0	0
ENSMUSG00000119431			2	133	0.488722	0	0	0	0	0	0
ENSMUSG00002075224			6	91	0.56044	0	0	0	0	0	0
ENSMUSG00002075225			1	110	0.590909	0	0	0	0	0	0
ENSMUSG00002076319			15	107	0.672897	0	0	3	0	0	0
ENSMUSG00002075227			11	78	0.512821	1	1	0	0	8	14
ENSMUSG00002076321			3	110	0.618182	2	0	0	0	0	0
ENSMUSG00002075229			5	122	0.221311	0	0	0	0	0	0
ENSMUSG00000118903			15	132	0.424242	0	0	0	0	0	0
ENSMUSG00002075231			4	133	0.842105	13	6	1	2	33	19
ENSMUSG00002075232			16	126	0.579365	0	0	0	0	0	0
ENSMUSG00002075233			4	109	0.559633	0	0	0	0	0	0
ENSMUSG00002075234			5	110	0.627273	0	0	0	0	0	0
ENSMUSG00002076328			1	110	0.618182	0	0	0	0	0	0
ENSMUSG00002075236			10	129	0.325581	0	0	0	0	0	0
ENSMUSG00002075601			13	125	0.592	0	0	0	0	0	0
ENSMUSG00002075117			3	109	0.605505	0	0	0	0	0	0
ENSMUSG00002075238			6	129	0.511628	0	0	0	0	0	0
ENSMUSG00002075240			2	104	0.317308	0	0	0	0	0	0
ENSMUSG00002075241			17	102	0.5	0	0	0	0	0	0
ENSMUSG00002076335			12	67	0.447761	0	0	0	0	0	0
ENSMUSG00002075243			9	73	0.424658	0	0	0	0	0	0
ENSMUSG00002075244			11	54	0.62963	0	0	0	0	0	0
ENSMUSG00002075245			14	89	0.213483	0	0	0	0	0	0
ENSMUSG00002076339			1	80	0.475	0	3	0	0	0	0
ENSMUSG00002075247			15	199	0.502513	3	1	0	22	4	7
ENSMUSG00002075248			18	70	0.271429	0	4	1	0	4	0
ENSMUSG00000094722			JH584298.1	1446	0.464039	0	0	0	0	0	0
ENSMUSG00002075250			19	159	0.471698	2	0	0	6	2	12
ENSMUSG00002076344			2	96	0.5625	0	0	0	0	0	0
ENSMUSG00000094728			GL456221.1	372	0.502688	0	0	0	0	0	0
ENSMUSG00002076346			1	82	0.52439	0	0	0	0	0	0
ENSMUSG00002075254			3	110	0.627273	0	0	0	0	0	0
ENSMUSG00002075619			4	64	0.34375	0	0	0	0	0	0
ENSMUSG00002075620			11	63	0.539683	0	0	0	0	0	0
ENSMUSG00002075257			4	110	0.754545	0	0	0	0	0	0
ENSMUSG00002075258			7	210	0.438095	0	0	0	0	0	0
ENSMUSG00002076352			17	199	0.698492	4	0	22	6	8	3
ENSMUSG00000094741			GL456354.1	1224	0.482843	0	0	0	0	0	0
ENSMUSG00002076354			10	119	0.504202	0	0	0	0	0	0
ENSMUSG00002075262			8	80	0.575	0	0	0	0	0	0
ENSMUSG00002075263			16	68	0.544118	0	0	0	0	0	0
ENSMUSG00002075264			9	119	0.361345	0	0	0	0	0	0
ENSMUSG00000095450			GL456221.1	372	0.502688	0	0	0	0	0	0
ENSMUSG00002075630			X	101	0.49505	0	0	0	0	0	0
ENSMUSG00002075267			12	64	0.375	0	0	0	0	0	0
ENSMUSG00002075268			6	92	0.445652	0	0	0	0	0	0
ENSMUSG00002075269			6	111	0.468468	0	0	0	0	0	0
ENSMUSG00002076727			7	107	0.579439	0	0	0	0	0	0
ENSMUSG00002076485			4	121	0.495868	0	0	0	0	0	0
ENSMUSG00002075272			2	118	0.372881	0	0	0	0	0	0
ENSMUSG00002076366			1	62	0.645161	0	0	0	0	0	0
ENSMUSG00002076367			13	138	0.666667	0	0	0	0	0	0
ENSMUSG00002075275			6	180	0.322222	0	0	0	0	0	0
ENSMUSG00002076369			13	142	0.507042	0	0	0	0	0	0
ENSMUSG00002076370			7	217	0.382488	0	0	0	0	0	0
ENSMUSG00002076734			6	70	0.328571	0	0	3	0	0	0
ENSMUSG00002075279			12	98	0.489796	0	0	0	0	0	0
ENSMUSG00002075644			6	110	0.618182	0	0	0	0	0	0
ENSMUSG00002076738			9	92	0.445652	0	0	0	0	0	0
ENSMUSG00002075646			X	78	0.538462	0	0	0	0	0	0
ENSMUSG00002076376			9	101	0.247525	0	0	0	0	0	0
ENSMUSG00002075284			X	69	0.565217	0	0	0	0	0	0
ENSMUSG00002076742			11	77	0.545455	0	0	0	0	0	0
ENSMUSG00002075286			6	101	0.49505	0	0	0	0	0	0
ENSMUSG00002076744			14	136	0.382353	0	0	0	0	0	0
ENSMUSG00002076381			3	65	0.615385	0	0	4	0	0	0
ENSMUSG00002075289			1	107	0.672897	0	0	0	0	0	0
ENSMUSG00002076018			12	117	0.393162	0	0	0	0	0	0
ENSMUSG00002075655			9	101	0.564356	0	0	0	0	0	0
ENSMUSG00002075292			4	129	0.317829	0	0	0	0	0	0
ENSMUSG00000095505			JH584296.1	837	0.46595	0	0	0	0	0	0
ENSMUSG00002075294			8	121	0.479339	0	0	0	0	0	0
ENSMUSG00002076388			2	123	0.333333	0	0	0	0	0	0
ENSMUSG00002075296			X	127	0.472441	0	0	0	0	0	0
ENSMUSG00002075297			17	59	0.79661	0	0	0	0	0	0
ENSMUSG00002076391			18	104	0.567308	0	0	0	0	0	0
ENSMUSG00000119010			14	132	0.484848	0	0	0	0	0	0
ENSMUSG00002075300			8	145	0.193103	0	0	0	0	0	0
ENSMUSG00002075301			11	144	0.284722	0	0	0	0	0	0
ENSMUSG00002075666			6	125	0.584	0	0	1	0	0	0
ENSMUSG00002075303			16	65	0.307692	0	0	0	0	0	0
ENSMUSG00002075304			11	177	0.384181	0	0	0	0	0	0
ENSMUSG00002075305			8	58	0.327586	0	0	0	0	0	0
ENSMUSG00002075306			12	120	0.358333	0	0	0	0	0	0
ENSMUSG00002076764			5	78	0.564103	0	0	4	0	0	0
ENSMUSG00002075308			16	111	0.279279	0	0	0	0	0	0
ENSMUSG00002076402			4	129	0.395349	0	0	0	0	0	0
ENSMUSG00002076403			5	69	0.449275	0	0	0	0	0	0
ENSMUSG00002076404			2	123	0.390244	1	0	1	0	0	0
ENSMUSG00002075312			3	138	0.557971	0	0	0	0	0	0
ENSMUSG00002075677			13	76	0.671053	0	0	0	0	0	0
ENSMUSG00002076407			13	100	0.47	0	0	0	0	0	0
ENSMUSG00000118852			8	132	0.507576	0	0	0	0	0	0
ENSMUSG00002075316			6	96	0.270833	0	0	1	1	1	0
ENSMUSG00002075317			1	110	0.572727	0	0	0	0	0	0
ENSMUSG00002076046			19	261	0.35249	0	0	0	0	0	0
ENSMUSG00002075683			18	50	0.92	0	0	0	0	0	0
ENSMUSG00002076413			X	128	0.375	0	0	0	0	0	0
ENSMUSG00002075321			7	110	0.609091	0	0	0	0	0	0
ENSMUSG00002076414			1	78	0.525641	0	0	0	0	0	0
ENSMUSG00002076780			1	121	0.495868	0	0	0	0	0	0
ENSMUSG00002075688			18	110	0.590909	0	0	0	0	0	0
ENSMUSG00002076418			6	110	0.618182	0	0	0	0	0	3
ENSMUSG00002076419			7	80	0.5875	0	0	0	0	0	0
ENSMUSG00002075691			8	77	0.545455	0	0	0	0	0	0
ENSMUSG00002076421			17	88	0.534091	8	4	5	6	11	11
ENSMUSG00002076058			8	125	0.576	0	0	0	0	0	0
ENSMUSG00002075330			6	171	0.479532	0	0	0	0	0	0
ENSMUSG00000119589			13	133	0.398496	0	4	2	0	0	0
ENSMUSG00002075332			19	407	0.447174	0	0	0	0	0	0
ENSMUSG00002076426			5	93	0.462366	0	0	0	0	0	0
ENSMUSG00002075334			11	126	0.587302	0	0	0	0	0	0
ENSMUSG00002076428			6	110	0.563636	0	0	0	0	0	0
ENSMUSG00002075336			13	114	0.377193	2	1	0	0	0	0
ENSMUSG00002075337			2	101	0.49505	0	0	0	0	0	0
ENSMUSG00002075338			19	78	0.576923	8	5	17	3	14	3
ENSMUSG00002075339			7	66	0.575758	0	0	0	0	0	0
ENSMUSG00002075340			13	108	0.268519	0	0	0	0	0	0
ENSMUSG00002075341			11	73	0.260274	0	0	0	0	4	0
ENSMUSG00002075342			6	102	0.5	0	0	0	0	0	0
ENSMUSG00002075343			13	83	0.325301	0	0	0	0	0	0
ENSMUSG00002075344			6	214	0.406542	0	0	0	0	0	0
ENSMUSG00002075345			15	232	0.37069	0	0	0	0	0	0
ENSMUSG00002075346			3	109	0.33945	0	0	0	0	3	0
ENSMUSG00002075347			7	126	0.571429	0	0	0	0	0	0
ENSMUSG00002075348			3	107	0.672897	0	0	0	0	0	0
ENSMUSG00002075349			15	102	0.5	0	0	0	0	0	0
ENSMUSG00002075350			13	116	0.534483	0	0	0	0	0	0
ENSMUSG00002075715			10	73	0.315068	0	0	0	0	0	0
ENSMUSG00002075352			7	94	0.595745	0	0	0	0	0	0
ENSMUSG00002075717			15	126	0.571429	0	0	0	0	0	0
ENSMUSG00002075354			4	90	0.5	0	0	0	0	0	0
ENSMUSG00002075355			1	122	0.5	0	0	0	0	0	0
ENSMUSG00002076449			5	78	0.589744	0	0	0	0	0	0
ENSMUSG00002076450			11	108	0.509259	0	0	1	0	0	0
ENSMUSG00002076451			12	70	0.7	0	0	0	0	0	0
ENSMUSG00000094915			GL456212.1	366	0.418033	0	0	0	0	0	0
ENSMUSG00002075360			4	74	0.364865	0	2	0	0	0	0
ENSMUSG00002075361			8	153	0.581699	0	0	0	0	0	0
ENSMUSG00000119100			6	132	0.469697	0	0	0	0	0	0
ENSMUSG00002076456			4	96	0.46875	0	0	2	0	0	0
ENSMUSG00002075364			6	101	0.49505	0	0	0	0	0	0
ENSMUSG00002075365			4	121	0.38843	0	0	0	0	0	0
ENSMUSG00002076823			10	237	0.518987	0	0	0	0	0	0
ENSMUSG00002075367			15	92	0.336957	0	0	0	0	0	0
ENSMUSG00002075368			1	88	0.625	0	0	0	0	0	0
ENSMUSG00000119112			2	132	0.484848	0	0	0	0	0	0
ENSMUSG00002075370			14	105	0.552381	0	0	0	0	0	0
ENSMUSG00002075371			2	68	0.279412	0	0	0	0	0	0
ENSMUSG00002075372			19	126	0.563492	0	0	0	0	0	0
ENSMUSG00002075373			8	111	0.558559	0	0	0	0	0	0
ENSMUSG00002075374			10	72	0.458333	0	0	0	0	0	0
ENSMUSG00002075375			10	162	0.462963	0	0	0	0	0	0
ENSMUSG00002075376			15	60	0.666667	0	0	0	0	0	0
ENSMUSG00002075377			1	75	0.466667	0	0	0	0	0	0
ENSMUSG00002075378			1	96	0.59375	0	0	0	0	0	0
ENSMUSG00002076472			2	103	0.621359	0	0	0	0	0	0
ENSMUSG00002076473			2	96	0.322917	0	0	6	0	0	0
ENSMUSG00002075381			19	132	0.333333	0	0	0	0	0	0
ENSMUSG00002075382			16	110	0.636364	0	0	0	0	0	0
ENSMUSG00002075383			11	97	0.536082	0	0	0	0	0	0
ENSMUSG00002075384			7	96	0.59375	0	0	0	0	0	0
ENSMUSG00002075385			13	196	0.418367	0	0	0	0	0	0
ENSMUSG00002076479			18	74	0.810811	0	0	0	0	0	0
ENSMUSG00002076480			4	60	0.55	0	0	0	0	0	0
ENSMUSG00002075388			11	96	0.65625	0	0	0	0	0	0
ENSMUSG00002076482			15	101	0.49505	0	0	0	0	0	0
ENSMUSG00002075390			X	92	0.532609	1	0	0	0	0	0
ENSMUSG00002076484			19	104	0.403846	0	0	0	0	0	0
ENSMUSG00002075513			9	67	0.432836	0	0	0	0	0	0
ENSMUSG00002075757			X	100	0.59	0	0	0	0	0	0
ENSMUSG00002076487			11	109	0.550459	0	0	0	0	0	0
ENSMUSG00002075395			13	108	0.564815	0	0	0	0	0	0
ENSMUSG00002076489			2	89	0.426966	4	1	7	0	0	1
ENSMUSG00002075397			6	96	0.65625	0	0	0	0	0	0
ENSMUSG00002076491			9	69	0.565217	0	0	0	0	1	0
ENSMUSG00002075399			X	115	0.391304	0	0	0	0	0	0
ENSMUSG00002075764			4	60	0.716667	0	0	0	0	0	0
ENSMUSG00002076494			14	161	0.391304	0	0	0	0	0	0
ENSMUSG00002075766			5	98	0.418367	0	0	0	0	0	0
ENSMUSG00002076860			7	129	0.465116	11	12	10	7	19	10
ENSMUSG00002076861			12	121	0.561983	0	0	0	0	0	0
ENSMUSG00002075769			7	101	0.50495	0	0	0	0	0	0
ENSMUSG00000119163			13	133	0.390977	0	1	0	1	0	0
ENSMUSG00002076500			2	137	0.576642	0	0	0	0	0	0
ENSMUSG00000119166			8	92	0.380435	0	0	0	0	0	0
ENSMUSG00002076502			7	110	0.545455	0	0	0	0	0	0
ENSMUSG00002075410			4	84	0.5	0	0	0	0	0	0
ENSMUSG00000119172			6	129	0.503876	0	0	0	0	0	0
ENSMUSG00002075412			X	119	0.478992	0	4	0	1	0	0
ENSMUSG00002075413			15	57	0.649123	0	0	0	0	0	0
ENSMUSG00002075414			5	150	0.573333	0	0	0	0	0	0
ENSMUSG00002075415			3	127	0.307087	0	0	0	0	0	0
ENSMUSG00002076509			16	95	0.421053	0	0	0	0	0	0
ENSMUSG00002076510			2	120	0.425	0	0	0	0	0	0
ENSMUSG00002076511			5	87	0.402299	0	0	0	0	0	0
ENSMUSG00002076512			3	101	0.49505	0	0	0	0	0	0
ENSMUSG00002076877			6	74	0.648649	0	1	4	0	0	0
ENSMUSG00002075421			9	128	0.546875	1	0	0	0	8	0
ENSMUSG00002076515			13	138	0.666667	0	0	0	0	0	0
ENSMUSG00002075423			7	61	0.295082	0	0	0	0	0	0
ENSMUSG00002075424			16	98	0.561224	0	0	0	0	0	0
ENSMUSG00002075425			8	137	0.510949	0	0	0	0	0	0
ENSMUSG00002076519			7	110	0.590909	0	0	0	0	0	0
ENSMUSG00002076520			13	101	0.49505	0	0	0	0	0	0
ENSMUSG00002076521			5	110	0.609091	2	0	0	0	0	0
ENSMUSG00002076522			4	103	0.533981	0	0	0	0	0	0
ENSMUSG00002075430			18	185	0.513514	0	0	0	0	0	0
ENSMUSG00002075431			2	370	0.391892	0	0	0	0	0	0
ENSMUSG00002075796			17	82	0.878049	0	0	0	0	0	0
ENSMUSG00002075433			14	118	0.525424	0	0	0	0	0	0
ENSMUSG00002075797			17	113	0.628319	0	0	0	0	0	0
ENSMUSG00002075435			18	121	0.495868	0	0	0	0	0	0
ENSMUSG00002075315			13	103	0.572816	0	0	0	0	0	0
ENSMUSG00002076530			13	171	0.444444	27	12	16	22	16	19
ENSMUSG00002076166			X	110	0.572727	0	0	0	0	0	0
ENSMUSG00002075439			2	65	0.446154	0	0	0	0	0	0
ENSMUSG00002075440			15	116	0.517241	0	0	0	0	0	0
ENSMUSG00002076534			4	77	0.519481	0	0	0	0	0	0
ENSMUSG00002076535			15	169	0.260355	0	0	0	0	0	0
ENSMUSG00000095092			GL456210.1	366	0.483607	0	0	0	0	0	0
ENSMUSG00002075444			13	141	0.680851	0	0	0	0	0	0
ENSMUSG00002075445			X	128	0.46875	0	0	0	0	0	0
ENSMUSG00000119221			X	114	0.403509	0	0	0	0	0	0
ENSMUSG00002076540			2	118	0.313559	0	0	0	0	0	1
ENSMUSG00002075448			6	187	0.588235	0	0	0	0	0	0
ENSMUSG00002075449			Y	110	0.618182	0	0	0	0	0	0
ENSMUSG00002076543			2	294	0.455782	0	0	1	0	0	0
ENSMUSG00000095779		novel pseudogene	4	1897	0.524512	0	0	0	0	0	0
ENSMUSG00002075816			19	70	0.6	0	0	0	0	0	0
ENSMUSG00002075453			11	216	0.527778	0	0	0	0	0	0
ENSMUSG00002075454			4	107	0.551402	0	0	0	0	1	0
ENSMUSG00002075455			17	110	0.618182	0	0	0	0	0	0
ENSMUSG00002075456			4	83	0.493976	3	0	0	0	0	0
ENSMUSG00002075821			12	135	0.474074	0	0	1	0	0	0
ENSMUSG00002075458			1	94	0.478723	0	0	0	0	0	0
ENSMUSG00002075459			8	97	0.402062	0	0	0	0	0	0
ENSMUSG00002075460			12	70	0.514286	0	0	0	0	0	0
ENSMUSG00002075825			X	68	0.514706	0	0	0	0	0	0
ENSMUSG00002075462			3	92	0.532609	0	0	0	0	0	0
ENSMUSG00002075099			13	119	0.546218	0	0	0	0	0	0
ENSMUSG00002075464			9	84	0.488095	0	0	0	0	0	0
ENSMUSG00002075465			15	62	0.66129	0	0	0	0	0	0
ENSMUSG00002076923			15	95	0.915789	0	0	0	0	0	0
ENSMUSG00002076560			2	124	0.290323	0	0	0	0	0	0
ENSMUSG00002075468			3	110	0.618182	0	0	0	0	0	0
ENSMUSG00002076562			12	109	0.577982	0	0	0	0	0	0
ENSMUSG00002076927			9	67	0.402985	0	0	0	0	0	0
ENSMUSG00002076564			5	76	0.644737	2	1	0	0	0	0
ENSMUSG00002075472			2	150	0.293333	0	0	0	0	0	0
ENSMUSG00002075473			16	110	0.581818	0	0	0	0	0	0
ENSMUSG00002076930			11	104	0.538462	0	0	0	0	0	0
ENSMUSG00002075475			5	138	0.565217	0	0	0	0	0	0
ENSMUSG00002075840			3	108	0.453704	0	0	0	0	0	0
ENSMUSG00002075477			4	110	0.627273	0	0	0	0	0	0
ENSMUSG00002075478			19	99	0.424242	0	0	0	0	0	0
ENSMUSG00002075479			4	72	0.486111	3	4	16	0	5	7
ENSMUSG00002075844			15	129	0.534884	0	0	0	0	0	0
ENSMUSG00002076574			12	63	0.31746	0	3	15	5	7	0
ENSMUSG00002075482			19	64	0.5625	0	0	0	0	0	0
ENSMUSG00002076576			17	61	0.491803	0	0	0	0	0	0
ENSMUSG00002075484			12	76	0.486842	0	0	0	0	0	0
ENSMUSG00002075485			4	77	0.571429	0	0	0	0	0	0
ENSMUSG00002075486			17	110	0.318182	0	0	0	0	0	0
ENSMUSG00002076580			2	92	0.358696	0	0	0	0	0	0
ENSMUSG00002075488			5	67	0.402985	3	0	0	0	2	0
ENSMUSG00002075489			4	110	0.418182	0	0	0	0	0	0
ENSMUSG00000110849		olfactory receptor 1545, pseudogene 1	9	375	0.410667	0	0	0	0	0	0
ENSMUSG00002075491			15	70	0.357143	0	0	0	0	0	0
ENSMUSG00002076585			2	126	0.404762	0	0	0	0	0	0
ENSMUSG00002075493			X	106	0.650943	0	0	0	0	0	0
ENSMUSG00002076951			5	77	0.532468	2	1	0	0	2	0
ENSMUSG00002076588			18	101	0.49505	0	0	0	0	0	0
ENSMUSG00002076589			1	101	0.50495	0	0	0	0	0	0
ENSMUSG00002075497			16	102	0.558824	0	0	0	0	0	0
ENSMUSG00002076591			3	110	0.581818	0	0	0	0	0	0
ENSMUSG00000115423		novel protein	2	944	0.474576	0	0	0	0	0	0
ENSMUSG00002075500			11	90	0.566667	0	0	0	0	3	0
ENSMUSG00002075501			1	56	0.714286	2	3	0	0	4	1
ENSMUSG00002075502			3	111	0.405405	0	0	0	0	0	0
ENSMUSG00002076596			12	136	0.485294	0	0	0	0	1	0
ENSMUSG00002076597			1	109	0.577982	0	0	0	0	0	0
ENSMUSG00002076598			7	123	0.390244	0	0	0	0	0	0
ENSMUSG00002075870			12	96	0.395833	5	0	12	0	0	0
ENSMUSG00002076964			11	136	0.536765	0	0	0	0	0	0
ENSMUSG00002075508			4	133	0.511278	0	0	0	0	0	0
ENSMUSG00002076602			5	93	0.354839	0	0	0	0	0	0
ENSMUSG00000111302		olfactory receptor 1236, pseudogene 1	2	509	0.365422	0	0	0	0	0	0
ENSMUSG00002075511			5	179	0.625698	0	0	0	0	0	0
ENSMUSG00002076605			13	121	0.495868	0	0	0	0	0	0
ENSMUSG00000118960			3	130	0.484615	0	0	0	0	0	0
ENSMUSG00002075514			4	88	0.431818	3	0	2	0	1	8
ENSMUSG00002075515			6	95	0.463158	0	0	0	0	0	0
ENSMUSG00002075516			11	93	0.591398	0	0	0	0	0	0
ENSMUSG00002076610			12	110	0.563636	0	0	0	0	0	0
ENSMUSG00002075518			2	96	0.583333	0	0	0	0	0	0
ENSMUSG00002075519			4	120	0.416667	0	0	0	0	0	0
ENSMUSG00002075520			4	91	0.681319	0	0	0	0	0	0
ENSMUSG00002076614			9	91	0.461538	0	0	0	0	0	0
ENSMUSG00002075522			11	84	0.321429	0	0	0	0	0	0
ENSMUSG00002075523			8	82	0.439024	0	0	0	0	0	0
ENSMUSG00002075524			9	57	0.736842	55	49	45	105	118	55
ENSMUSG00002076617			2	121	0.38843	0	0	0	0	0	0
ENSMUSG00002075526			16	113	0.460177	0	0	0	0	0	0
ENSMUSG00002075527			1	101	0.485149	0	0	0	0	0	0
ENSMUSG00002075528			2	67	0.716418	0	0	0	0	0	0
ENSMUSG00002076622			5	110	0.3	0	0	0	0	0	0
ENSMUSG00002075894			12	119	0.151261	0	0	0	0	0	0
ENSMUSG00002075531			1	121	0.512397	0	0	0	0	0	0
ENSMUSG00002075532			16	88	0.306818	0	0	0	0	0	0
ENSMUSG00002075533			6	73	0.671233	0	0	0	0	0	0
ENSMUSG00002075898			11	117	0.247863	1	0	0	0	0	0
ENSMUSG00002075535			7	125	0.56	0	0	0	0	0	0
ENSMUSG00002075536			7	91	0.505495	0	0	0	0	0	0
ENSMUSG00002075537			4	85	0.858824	0	0	0	0	0	0
ENSMUSG00002075538			14	117	0.273504	0	0	0	0	0	0
ENSMUSG00000118029		TEC	19	2090	0.57177	13	11	22	0	10	1
ENSMUSG00002075904			13	142	0.661972	0	0	0	0	0	0
ENSMUSG00002075541			2	127	0.377953	0	0	0	0	0	0
ENSMUSG00002076635			3	121	0.495868	0	0	0	0	0	0
ENSMUSG00002075907			8	90	0.833333	0	0	0	0	0	0
ENSMUSG00002075544			7	66	0.333333	0	0	0	0	0	0
ENSMUSG00002075545			1	77	0.532468	1	0	1	2	0	0
ENSMUSG00002075546			12	104	0.557692	0	0	0	0	0	0
ENSMUSG00002075547			4	64	0.609375	0	0	0	0	0	0
ENSMUSG00002076641			X	85	0.376471	0	0	0	0	0	0
ENSMUSG00002076642			7	121	0.479339	0	0	0	0	0	0
ENSMUSG00002075914			12	78	0.666667	0	0	0	0	0	0
ENSMUSG00002075551			13	57	0.719298	0	0	0	0	1	0
ENSMUSG00002075552			1	105	0.485714	0	0	0	0	0	0
ENSMUSG00002075553			4	110	0.372727	0	0	1	0	0	0
ENSMUSG00002075554			8	131	0.465649	0	0	0	0	0	0
ENSMUSG00002075555			8	80	0.5125	0	0	0	0	0	0
ENSMUSG00002075556			2	84	0.345238	0	0	0	0	0	0
ENSMUSG00002075436			15	77	0.493506	0	0	0	0	0	0
ENSMUSG00002076651			12	207	0.347826	0	0	0	0	0	0
ENSMUSG00000119928			12	132	0.5	0	0	0	0	0	1
ENSMUSG00002075560			X	86	0.395349	0	0	0	0	0	0
ENSMUSG00000119930			5	123	0.487805	0	0	0	0	0	0
ENSMUSG00002075562			9	127	0.385827	1	2	0	0	0	0
ENSMUSG00002075927			6	112	0.589286	0	0	0	0	0	0
ENSMUSG00002075928			6	114	0.333333	0	0	0	0	0	0
ENSMUSG00002075565			4	102	0.5	0	0	0	0	0	0
ENSMUSG00002075566			9	82	0.47561	0	0	0	0	0	0
ENSMUSG00002075931			11	216	0.527778	0	0	0	0	0	0
ENSMUSG00002076661			1	84	0.47619	0	0	0	0	0	0
ENSMUSG00000119398			17	88	0.443182	0	0	0	0	0	0
ENSMUSG00002076663			17	126	0.571429	0	0	0	0	0	0
ENSMUSG00002075571			16	110	0.618182	0	0	0	0	0	0
ENSMUSG00002076665			15	173	0.624277	0	0	0	0	0	0
ENSMUSG00002075573			12	86	0.546512	0	0	0	0	0	0
ENSMUSG00002076666			11	138	0.586957	0	0	0	0	0	0
ENSMUSG00002075575			18	110	0.554545	0	0	0	0	0	0
ENSMUSG00002075576			11	101	0.445545	0	0	0	0	0	0
ENSMUSG00002076669			1	154	0.5	0	0	0	0	0	0
ENSMUSG00002075942			8	91	0.307692	0	0	0	0	0	0
ENSMUSG00002075579			11	66	0.30303	0	0	0	0	0	0
ENSMUSG00002075580			6	143	0.447552	0	0	0	0	0	0
ENSMUSG00002075581			3	106	0.396226	0	0	0	0	0	0
ENSMUSG00000119417			19	50	0.42	0	0	0	0	0	0
ENSMUSG00002075583			1	143	0.517483	0	0	0	0	0	0
ENSMUSG00002075584			8	130	0.446154	0	0	0	0	0	0
ENSMUSG00002075949			X	137	0.430657	0	0	0	0	0	0
ENSMUSG00002076679			15	116	0.189655	0	0	0	0	0	0
ENSMUSG00002075951			5	83	0.457831	0	0	0	0	0	0
ENSMUSG00000119432			9	72	0.402778	0	0	0	0	0	0
ENSMUSG00002076682			9	59	0.627119	0	0	0	0	0	0
ENSMUSG00002075590			15	69	0.463768	0	0	0	0	0	0
ENSMUSG00002075591			12	142	0.415493	1	0	0	0	0	0
ENSMUSG00002075592			8	60	0.666667	0	0	0	0	0	0
ENSMUSG00002076686			2	126	0.380952	0	0	0	0	0	0
ENSMUSG00002075958			8	127	0.464567	0	0	0	0	0	0
ENSMUSG00002076808			3	120	0.491667	0	0	0	0	0	0
ENSMUSG00002075596			12	110	0.572727	0	0	0	0	0	0
ENSMUSG00002075597			13	138	0.666667	0	0	0	0	0	0
ENSMUSG00002075598			10	203	0.448276	0	0	0	0	0	0
ENSMUSG00002075599			17	100	0.51	0	0	0	0	0	0
ENSMUSG00002076692			8	110	0.618182	0	0	0	0	0	0
ENSMUSG00002074870			7	96	0.510417	0	0	0	0	0	0
ENSMUSG00002075602			19	87	0.862069	2	0	1	0	0	0
ENSMUSG00002075603			17	117	0.641026	0	0	0	0	2	0
ENSMUSG00002076697			3	138	0.637681	0	0	0	0	0	0
ENSMUSG00002075605			13	129	0.457364	0	0	0	0	0	0
ENSMUSG00002075606			X	64	0.421875	0	0	0	0	0	0
ENSMUSG00002075607			14	256	0.386719	0	0	0	0	0	0
ENSMUSG00002075608			6	95	0.442105	0	0	0	0	0	0
ENSMUSG00002076702			5	74	0.567568	0	0	0	0	0	0
ENSMUSG00002075610			11	71	0.422535	0	0	0	0	0	0
ENSMUSG00002075611			1	93	0.483871	0	0	0	0	0	0
ENSMUSG00002076705			8	109	0.633028	0	0	0	0	0	0
ENSMUSG00000119468			13	132	0.469697	0	0	0	0	0	0
ENSMUSG00000079190			GL456211.1	1473	0.492193	0	0	0	0	1	0
ENSMUSG00000079192			GL456210.1	255	0.466667	0	0	0	0	0	0
ENSMUSG00000118106		TEC	19	2276	0.52065	0	0	0	0	1	4
ENSMUSG00002075617			14	112	0.178571	0	0	1	0	0	0
ENSMUSG00002075618			13	66	0.333333	0	5	2	0	0	0
ENSMUSG00002075983			12	70	0.7	0	0	0	0	0	0
ENSMUSG00002075984			19	121	0.495868	0	0	7	0	0	0
ENSMUSG00002075621			12	87	0.551724	0	0	0	0	0	0
ENSMUSG00002075622			9	107	0.672897	0	0	0	0	0	0
ENSMUSG00002075623			19	109	0.577982	0	0	0	0	0	0
ENSMUSG00000119486			2	132	0.44697	0	0	0	0	0	0
ENSMUSG00002075625			6	70	0.7	0	0	0	0	0	0
ENSMUSG00002075626			7	107	0.663551	0	0	0	0	0	0
ENSMUSG00002075627			17	116	0.275862	0	0	0	0	0	0
ENSMUSG00002075628			1	85	0.2	0	0	0	0	0	0
ENSMUSG00002075993			13	107	0.672897	0	0	0	0	0	0
ENSMUSG00002075994			19	107	0.654206	0	0	0	0	0	0
ENSMUSG00002075631			2	126	0.380952	0	0	0	0	0	0
ENSMUSG00002075996			7	84	0.488095	0	0	0	0	0	0
ENSMUSG00002076726			13	109	0.59633	0	0	0	0	0	0
ENSMUSG00002076483			5	101	0.50495	0	0	0	0	0	0
ENSMUSG00002075756			9	97	0.453608	0	0	0	0	0	0
ENSMUSG00002076729			X	86	0.395349	0	0	0	0	0	0
ENSMUSG00002076730			17	223	0.632287	0	1	0	2	0	0
ENSMUSG00002076731			2	79	0.506329	3	0	1	0	2	1
ENSMUSG00002075639			X	97	0.639175	0	0	0	0	0	0
ENSMUSG00000118969			6	132	0.469697	0	0	0	0	0	0
ENSMUSG00002075641			7	110	0.590909	0	0	0	0	0	0
ENSMUSG00002075763			13	101	0.49505	0	0	0	0	0	0
ENSMUSG00002076128			15	95	0.242105	0	0	0	0	0	0
ENSMUSG00002076372			15	52	0.596154	0	0	0	0	0	0
ENSMUSG00000095672			GL456211.1	366	0.486339	0	0	0	0	0	0
ENSMUSG00002076010			X	93	0.537634	4	0	2	0	2	0
ENSMUSG00002075647			2	96	0.53125	0	0	0	0	0	3
ENSMUSG00002076012			6	90	0.388889	0	0	0	0	0	0
ENSMUSG00002076377			7	109	0.651376	0	0	0	0	0	0
ENSMUSG00002075650			1	112	0.151786	0	0	0	0	0	0
ENSMUSG00002076743			2	125	0.576	0	0	0	0	0	0
ENSMUSG00002075652			17	121	0.495868	0	0	0	0	0	0
ENSMUSG00002075653			6	121	0.479339	0	0	0	0	0	0
ENSMUSG00002076382			16	73	0.547945	0	0	1	1	4	0
ENSMUSG00002076383			9	86	0.604651	0	0	0	0	0	0
ENSMUSG00000119532			X	143	0.482517	0	0	0	0	0	0
ENSMUSG00002076021			6	233	0.313305	0	0	0	0	0	0
ENSMUSG00000113373		novel protein	5	138	0.478261	0	0	0	0	0	0
ENSMUSG00002076752			1	112	0.598214	0	0	0	0	0	0
ENSMUSG00002075660			12	70	0.657143	0	0	0	0	0	0
ENSMUSG00002075661			4	65	0.876923	0	0	0	0	0	0
ENSMUSG00002075662			6	177	0.40678	0	0	0	0	0	0
ENSMUSG00002076027			X	110	0.454545	0	0	0	0	0	0
ENSMUSG00002075664			5	160	0.6875	0	0	0	0	0	0
ENSMUSG00002075665			6	146	0.486301	0	0	0	0	0	0
ENSMUSG00002075787			18	113	0.60177	0	0	0	0	0	0
ENSMUSG00002075667			9	84	0.416667	0	0	0	0	0	0
ENSMUSG00002075668			2	121	0.421488	0	0	0	0	0	0
ENSMUSG00002076762			10	122	0.52459	0	0	0	0	0	0
ENSMUSG00002075670			16	108	0.657407	0	0	0	0	0	0
ENSMUSG00002076399			2	260	0.334615	0	0	0	0	0	0
ENSMUSG00002075672			16	124	0.516129	1	2	4	0	10	11
ENSMUSG00002076765			2	94	0.255319	0	0	0	0	0	0
ENSMUSG00002076767			X	80	0.55	0	0	0	0	0	0
ENSMUSG00002075675			13	138	0.666667	3	5	22	0	0	0
ENSMUSG00002075676			12	80	0.575	0	0	0	0	0	0
ENSMUSG00002076041			X	106	0.650943	0	0	0	0	0	0
ENSMUSG00002076406			19	106	0.424528	0	0	0	0	0	2
ENSMUSG00002075679			6	93	0.903226	0	0	4	5	5	4
ENSMUSG00002075680			11	109	0.633028	0	0	0	0	0	0
ENSMUSG00002076409			14	113	0.39823	0	0	0	0	0	0
ENSMUSG00002076410			12	65	0.338462	0	0	0	0	0	0
ENSMUSG00002076411			6	102	0.5	0	0	0	0	0	0
ENSMUSG00002075684			10	83	0.39759	0	0	0	0	0	0
ENSMUSG00002075685			11	147	0.353741	0	0	0	0	0	0
ENSMUSG00002076778			2	129	0.426357	0	0	0	0	0	0
ENSMUSG00000119577			8	144	0.527778	0	0	0	0	6	8
ENSMUSG00002076416			2	83	0.313253	0	0	0	0	0	0
ENSMUSG00002076295			10	83	0.662651	0	1	0	0	0	0
ENSMUSG00002075690			12	61	0.540984	0	0	0	0	0	0
ENSMUSG00000096236			JH584297.1	1221	0.481572	0	0	0	0	0	0
ENSMUSG00002075692			4	66	0.333333	0	0	0	0	0	0
ENSMUSG00002075329			15	124	0.403226	0	0	0	0	0	0
ENSMUSG00002075694			8	110	0.581818	0	0	0	0	0	0
ENSMUSG00002076423			X	121	0.61157	0	0	0	0	0	0
ENSMUSG00002075696			4	120	0.566667	0	0	1	1	0	0
ENSMUSG00002076790			9	104	0.596154	0	0	0	0	0	0
ENSMUSG00002076791			1	78	0.576923	0	0	0	0	0	0
ENSMUSG00000095570			GL456354.1	1443	0.471933	0	0	0	0	0	0
ENSMUSG00002075700			X	121	0.495868	0	0	0	0	0	0
ENSMUSG00002076065			5	70	0.314286	0	0	0	0	0	0
ENSMUSG00002076795			8	199	0.341709	0	0	0	0	0	0
ENSMUSG00002075703			8	101	0.49505	0	0	0	0	0	0
ENSMUSG00002075704			14	107	0.242991	0	0	0	0	0	0
ENSMUSG00002076798			19	116	0.413793	0	0	0	0	0	0
ENSMUSG00002076070			9	110	0.627273	0	0	0	0	0	0
ENSMUSG00002076800			2	110	0.618182	0	0	0	0	0	0
ENSMUSG00002075708			14	80	0.575	0	0	0	0	0	0
ENSMUSG00002075709			5	135	0.659259	0	0	0	0	0	0
ENSMUSG00002075710			2	77	0.454545	0	5	4	0	2	0
ENSMUSG00002075711			13	138	0.666667	0	0	0	0	0	0
ENSMUSG00002075712			5	101	0.50495	0	0	0	0	0	0
ENSMUSG00002075713			8	114	0.640351	0	0	0	0	0	4
ENSMUSG00002075714			13	124	0.564516	0	0	0	0	0	0
ENSMUSG00002076079			19	109	0.458716	0	0	0	0	0	0
ENSMUSG00002075837			Y	99	0.333333	0	0	0	0	0	0
ENSMUSG00002076445			13	141	0.673759	0	0	5	0	0	15
ENSMUSG00002076811			4	125	0.464	0	0	0	0	0	0
ENSMUSG00002075719			10	85	0.505882	0	0	0	0	0	0
ENSMUSG00002076813			1	100	0.49	0	0	0	0	0	0
ENSMUSG00002075721			X	107	0.663551	0	0	0	0	0	0
ENSMUSG00000117102		Novel transcript	17	3039	0.455742	2	1	19	0	2	0
ENSMUSG00002075723			4	90	0.4	0	0	0	0	0	0
ENSMUSG00002075724			1	121	0.495868	1	0	0	0	0	1
ENSMUSG00002075725			7	110	0.572727	0	0	0	0	0	0
ENSMUSG00002075847			1	121	0.495868	0	0	0	0	1	0
ENSMUSG00000119643			7	90	0.633333	0	0	0	0	0	0
ENSMUSG00002075728			3	91	0.307692	0	0	0	0	0	0
ENSMUSG00002075729			GL456385.1	100	0.5	0	0	0	0	0	0
ENSMUSG00002076094			4	101	0.514851	0	0	0	0	0	0
ENSMUSG00002075731			10	76	0.447368	0	0	0	0	0	0
ENSMUSG00002076825			13	108	0.546296	0	0	0	0	0	0
ENSMUSG00002075733			17	145	0.689655	0	0	2	0	0	0
ENSMUSG00002075855			7	224	0.357143	0	0	0	0	0	0
ENSMUSG00002076828			2	96	0.59375	0	0	0	0	0	0
ENSMUSG00002076464			17	323	0.674923	5	2	5	24	6	0
ENSMUSG00002075737			5	110	0.618182	1	1	0	0	0	0
ENSMUSG00002075738			2	124	0.33871	0	0	0	0	0	0
ENSMUSG00002076832			4	89	0.876404	0	0	0	0	0	0
ENSMUSG00002075740			6	110	0.554545	0	0	0	0	0	0
ENSMUSG00002075741			6	112	0.339286	8	2	2	1	0	18
ENSMUSG00002076835			2	120	0.416667	0	0	0	0	0	0
ENSMUSG00002075743			6	110	0.554545	0	0	0	0	0	0
ENSMUSG00002075744			X	86	0.406977	0	0	0	0	0	0
ENSMUSG00002075866			12	66	0.333333	2	0	5	0	0	0
ENSMUSG00002075746			13	255	0.517647	0	0	0	0	0	0
ENSMUSG00002075747			4	96	0.479167	0	0	0	0	0	0
ENSMUSG00002075748			2	102	0.5	0	0	0	0	0	0
ENSMUSG00002076477			1	116	0.465517	0	0	0	0	0	0
ENSMUSG00002076843			16	70	0.6	0	0	0	0	0	0
ENSMUSG00002075751			3	112	0.696429	0	0	0	0	0	0
ENSMUSG00002076845			14	66	0.318182	0	0	0	0	0	0
ENSMUSG00002075753			15	107	0.691589	0	0	0	0	0	0
ENSMUSG00002076847			11	88	0.363636	0	0	0	0	0	0
ENSMUSG00002076969			4	77	0.467532	0	0	0	0	0	0
ENSMUSG00002075877			13	84	0.47619	0	0	0	0	0	0
ENSMUSG00002076121			7	71	0.690141	0	1	1	0	0	0
ENSMUSG00002075758			X	122	0.606557	0	0	0	0	0	0
ENSMUSG00002075759			14	121	0.495868	0	0	0	0	0	0
ENSMUSG00002075760			11	105	0.695238	0	0	0	0	0	0
ENSMUSG00002075761			6	139	0.532374	3	3	4	4	7	3
ENSMUSG00002076855			2	53	0.679245	1	0	5	0	5	0
ENSMUSG00002076248			11	77	0.545455	0	0	0	0	0	0
ENSMUSG00002076978			18	90	0.433333	0	0	0	0	0	0
ENSMUSG00002075765			9	118	0.525424	0	0	1	0	0	0
ENSMUSG00002076980			2	127	0.393701	0	0	0	0	0	0
ENSMUSG00000118632		component of Sp100-rs (Csprs) pseudogene	1	355	0.433803	0	0	0	0	0	5
ENSMUSG00000119513			8	92	0.347826	0	0	0	0	0	0
ENSMUSG00002075890			11	138	0.652174	0	1	10	4	5	3
ENSMUSG00002075770			4	591	0.563452	0	0	0	0	0	0
ENSMUSG00002075771			8	68	0.426471	0	0	0	0	0	0
ENSMUSG00000119713			9	132	0.454545	0	0	0	0	0	0
ENSMUSG00002075773			15	138	0.557971	0	0	0	0	0	0
ENSMUSG00002075774			18	110	0.563636	0	0	0	0	0	0
ENSMUSG00002075775			6	110	0.627273	0	0	0	0	0	0
ENSMUSG00002076869			2	120	0.4	0	0	0	0	0	0
ENSMUSG00002075777			18	71	0.549296	0	0	0	0	0	0
ENSMUSG00002076871			15	114	0.508772	0	0	0	0	0	0
ENSMUSG00002075779			9	129	0.403101	0	0	4	0	0	0
ENSMUSG00000118646			10	383	0.584856	0	0	1	0	0	0
ENSMUSG00002075781			6	125	0.576	0	0	0	0	0	0
ENSMUSG00002076875			10	126	0.507937	0	0	0	0	0	0
ENSMUSG00002076876			4	126	0.579365	0	0	0	0	0	0
ENSMUSG00002076148			11	126	0.396825	0	0	0	0	0	0
ENSMUSG00002075785			8	121	0.495868	0	0	0	0	0	0
ENSMUSG00002076879			9	67	0.432836	0	0	0	0	0	0
ENSMUSG00002075908			9	126	0.555556	3	4	0	0	0	1
ENSMUSG00002076152			11	70	0.614286	0	0	0	0	0	0
ENSMUSG00000118656		olfactory receptor, family 13, subfamily H, member 1 (OR13H1) pseudogene	X	87	0.413793	0	0	0	0	0	0
ENSMUSG00002075790			10	101	0.465347	0	0	0	0	0	0
ENSMUSG00000118658		SNW domain containing 1 (Snw1) pseudogene	12	166	0.403614	0	0	0	0	0	0
ENSMUSG00002075792			7	110	0.563636	0	0	0	0	0	0
ENSMUSG00002076886			3	86	0.27907	0	0	0	0	0	0
ENSMUSG00002075794			19	110	0.536364	0	0	0	0	0	0
ENSMUSG00000095742			JH584295.1	243	0.703704	15	9	7	4	15	16
ENSMUSG00002076524			16	110	0.627273	0	0	0	3	0	0
ENSMUSG00000110033		olfactory receptor 1527, pseudogene 1	7	939	0.450479	0	0	0	0	0	0
ENSMUSG00002076162			13	138	0.666667	0	0	0	0	0	0
ENSMUSG00002075799			5	99	0.474747	0	0	0	0	0	0
ENSMUSG00002076892			10	101	0.49505	0	0	0	0	0	0
ENSMUSG00002076894			5	137	0.532847	0	0	0	0	0	0
ENSMUSG00000095076			JH584298.1	1215	0.469136	0	0	0	0	0	0
ENSMUSG00002075803			2	92	0.434783	0	0	0	0	0	0
ENSMUSG00002076168			10	110	0.581818	0	0	0	0	0	0
ENSMUSG00002075805			6	110	0.6	0	0	0	0	0	0
ENSMUSG00002076899			X	96	0.510417	0	0	0	0	0	0
ENSMUSG00002075807			10	110	0.609091	0	0	0	0	0	0
ENSMUSG00002075808			9	141	0.680851	0	4	0	0	0	0
ENSMUSG00002076537			18	166	0.355422	0	0	0	0	0	0
ENSMUSG00002076901			X	102	0.5	0	0	0	0	0	0
ENSMUSG00002076904			2	126	0.587302	0	0	0	0	0	0
ENSMUSG00002075812			2	100	0.44	0	0	0	0	0	0
ENSMUSG00002075813			19	124	0.16129	0	0	0	0	0	0
ENSMUSG00002075814			13	108	0.564815	0	0	0	0	0	0
ENSMUSG00002076907			13	138	0.666667	0	0	0	0	0	0
ENSMUSG00002076544			1	101	0.49505	0	0	0	0	0	0
ENSMUSG00002075817			4	125	0.592	0	0	0	0	0	0
ENSMUSG00002075818			X	134	0.365672	1	1	0	0	0	0
ENSMUSG00002075819			1	100	0.51	0	0	0	0	0	0
ENSMUSG00002075820			3	74	0.567568	1	0	0	0	0	0
ENSMUSG00002076185			3	101	0.49505	0	0	0	0	0	0
ENSMUSG00002075822			6	78	0.512821	0	1	0	0	0	0
ENSMUSG00002076916			10	133	0.646617	0	0	0	0	0	0
ENSMUSG00002076917			2	100	0.38	1	0	0	0	0	0
ENSMUSG00000118703			6	132	0.469697	0	0	0	0	0	0
ENSMUSG00002076919			10	94	0.595745	0	0	0	0	0	0
ENSMUSG00002075463			2	87	0.482759	27	15	38	10	24	17
ENSMUSG00002075828			8	109	0.559633	0	0	0	0	0	0
ENSMUSG00002076922			5	97	0.628866	0	0	0	0	0	0
ENSMUSG00000119612			12	132	0.507576	0	0	0	0	0	0
ENSMUSG00002075831			X	104	0.375	0	0	0	0	0	0
ENSMUSG00002076925			15	101	0.49505	0	0	0	0	0	0
ENSMUSG00002075833			4	138	0.485507	0	0	0	0	0	0
ENSMUSG00002076926			7	110	0.572727	0	0	0	0	0	0
ENSMUSG00002075835			15	71	0.535211	0	0	0	0	0	0
ENSMUSG00002075836			3	108	0.509259	0	0	0	0	0	0
ENSMUSG00002076443			16	125	0.592	0	0	0	0	0	0
ENSMUSG00000107399		olfactory receptor 1544, pseudogene 1	10	944	0.416314	0	0	0	0	0	0
ENSMUSG00002075839			1	132	0.363636	0	0	0	0	0	0
ENSMUSG00002076568			2	91	0.384615	0	0	0	0	0	0
ENSMUSG00002075841			5	105	0.514286	0	0	0	0	0	0
ENSMUSG00002075842			1	121	0.413223	1	0	8	0	2	4
ENSMUSG00002076936			14	119	0.294118	2	0	0	1	0	0
ENSMUSG00000094474			JH584299.1	1446	0.464039	0	0	0	0	0	0
ENSMUSG00002075845			X	107	0.654206	0	0	0	0	0	0
ENSMUSG00002075846			15	98	0.428571	0	0	0	0	0	0
ENSMUSG00002075968			6	126	0.555556	0	0	0	0	0	0
ENSMUSG00002075848			6	97	0.525773	4	4	5	2	6	0
ENSMUSG00002075849			5	92	0.521739	0	0	0	0	0	0
ENSMUSG00002075850			Y	110	0.618182	0	0	0	0	0	0
ENSMUSG00002075851			19	89	0.831461	0	1	0	0	0	0
ENSMUSG00002076945			17	272	0.584559	0	6	4	0	0	0
ENSMUSG00002076946			10	68	0.338235	2	0	0	0	0	0
ENSMUSG00002075854			16	110	0.290909	0	0	0	0	0	0
ENSMUSG00002075976			7	80	0.475	3	6	0	0	0	0
ENSMUSG00002075856			3	121	0.495868	0	0	0	0	0	0
ENSMUSG00002075857			8	202	0.529703	0	0	0	0	0	0
ENSMUSG00002076222			18	94	0.265957	0	0	0	0	0	0
ENSMUSG00000118748			11	132	0.515152	0	0	0	0	0	0
ENSMUSG00002075860			7	69	0.478261	0	0	0	0	0	0
ENSMUSG00002075861			11	67	0.641791	0	0	0	0	0	0
ENSMUSG00002075862			7	110	0.627273	0	0	0	0	0	0
ENSMUSG00002076712			6	147	0.578231	0	0	0	0	0	0
ENSMUSG00000096100			GL456211.1	372	0.497312	0	0	0	0	0	0
ENSMUSG00002075865			2	125	0.576	1	0	1	0	8	0
ENSMUSG00002074892			12	97	0.639175	0	0	0	0	0	0
ENSMUSG00002075867			2	76	0.434211	0	0	0	0	0	0
ENSMUSG00002074894			11	126	0.555556	0	0	0	0	0	0
ENSMUSG00002076962			1	84	0.488095	0	0	0	0	0	0
ENSMUSG00000115801		novel transcript	14	93147	0.408183	14	0	0	0	0	0
ENSMUSG00000118364		TEC	19	1757	0.480364	3	0	6	0	14	1
ENSMUSG00002075872			3	84	0.380952	0	0	0	0	0	0
ENSMUSG00002076966			X	127	0.409449	0	0	0	0	0	0
ENSMUSG00002076238			15	80	0.575	0	0	0	0	0	0
ENSMUSG00002076968			11	112	0.589286	0	0	0	0	0	0
ENSMUSG00002076361			9	97	0.412371	0	0	0	0	0	0
ENSMUSG00000118957			X	114	0.429825	0	0	0	0	0	0
ENSMUSG00002075878			2	124	0.290323	0	0	0	0	0	0
ENSMUSG00002076972			X	86	0.383721	0	0	0	0	0	0
ENSMUSG00002075880			10	67	0.402985	0	0	0	0	0	0
ENSMUSG00002075881			4	126	0.571429	0	0	0	0	0	0
ENSMUSG00002075882			12	76	0.657895	0	0	0	0	0	0
ENSMUSG00002076976			15	91	0.494505	0	0	0	0	0	0
ENSMUSG00002076005			5	68	0.764706	0	0	0	0	0	0
ENSMUSG00002076127			2	122	0.295082	0	0	0	0	0	0
ENSMUSG00002075886			6	147	0.312925	0	0	0	0	0	0
ENSMUSG00002076857			1	100	0.27	1	0	0	0	0	0
ENSMUSG00002075888			2	189	0.677249	0	0	0	0	0	0
ENSMUSG00002076859			15	101	0.49505	0	0	0	0	0	0
ENSMUSG00002076375			16	163	0.429448	0	0	0	0	0	0
ENSMUSG00002075891			19	77	0.506494	0	0	0	0	0	0
ENSMUSG00002076985			7	121	0.479339	0	0	0	0	0	0
ENSMUSG00002075893			18	121	0.495868	0	1	0	0	0	0
ENSMUSG00002076986			15	127	0.354331	0	0	0	0	0	0
ENSMUSG00002075895			16	89	0.865169	0	0	0	0	0	0
ENSMUSG00002075896			3	103	0.883495	0	0	0	0	0	0
ENSMUSG00002075897			7	102	0.558824	0	0	0	0	0	0
ENSMUSG00002076626			19	86	0.290698	0	0	0	0	0	0
ENSMUSG00002075899			19	82	0.695122	0	0	0	0	0	0
ENSMUSG00002075900			18	121	0.404959	0	0	0	0	0	0
ENSMUSG00002075901			7	110	0.627273	0	0	0	0	0	0
ENSMUSG00002075902			10	125	0.608	0	2	0	0	0	0
ENSMUSG00000111339		post-GPI attachment to proteins 2	7	606	0.542904	0	0	0	0	0	0
ENSMUSG00000118820			6	132	0.469697	0	0	0	0	0	0
ENSMUSG00002075905			12	137	0.49635	0	0	0	0	0	0
ENSMUSG00002075906			8	86	0.918605	0	0	0	0	0	0
ENSMUSG00000119358			2	136	0.441176	0	0	0	0	0	0
ENSMUSG00000119011			11	144	0.506944	8	10	3	1	6	0
ENSMUSG00002076273			14	105	0.761905	0	0	0	1	0	0
ENSMUSG00002075910			6	194	0.556701	0	3	3	0	0	0
ENSMUSG00002076639			4	110	0.627273	1	0	0	0	0	0
ENSMUSG00002076397			6	120	0.391667	0	0	0	0	0	0
ENSMUSG00002075913			4	83	0.518072	0	0	0	0	0	6
ENSMUSG00002076278			X	92	0.380435	0	0	0	0	0	0
ENSMUSG00002075915			12	109	0.568807	0	1	0	4	0	0
ENSMUSG00002075916			5	81	0.37037	0	0	0	0	0	0
ENSMUSG00002075917			4	91	0.472527	0	0	0	0	0	0
ENSMUSG00002076646			11	75	0.453333	0	0	0	0	0	0
ENSMUSG00002076283			17	98	0.244898	0	0	0	0	0	0
ENSMUSG00002075920			4	127	0.535433	0	0	0	0	0	0
ENSMUSG00002075193			10	107	0.663551	0	0	0	0	0	0
ENSMUSG00002075922			1	129	0.488372	0	0	0	0	0	0
ENSMUSG00002075557			12	162	0.524691	0	0	0	0	0	0
ENSMUSG00002076652			6	177	0.542373	0	0	0	0	0	0
ENSMUSG00002076289			14	96	0.229167	0	0	0	0	0	0
ENSMUSG00002075926			8	55	0.472727	0	0	0	0	0	0
ENSMUSG00002076655			13	109	0.495413	0	0	0	0	0	0
ENSMUSG00002076292			18	134	0.529851	0	0	0	0	0	0
ENSMUSG00002075929			2	78	0.525641	0	0	0	0	0	0
ENSMUSG00002076294			9	126	0.579365	0	0	0	0	0	0
ENSMUSG00002076658			5	80	0.75	0	0	0	0	0	0
ENSMUSG00002075932			9	108	0.0925926	0	0	0	0	0	0
ENSMUSG00002075933			14	95	0.442105	0	0	0	0	0	0
ENSMUSG00000119763			X	114	0.429825	0	0	0	0	0	0
ENSMUSG00002075935			5	121	0.198347	0	0	0	0	0	0
ENSMUSG00002075936			14	79	0.379747	0	0	0	0	0	0
ENSMUSG00002076301			5	74	0.22973	0	0	0	0	0	0
ENSMUSG00000119588			6	132	0.469697	0	0	0	0	0	0
ENSMUSG00002075939			15	101	0.485149	0	0	0	0	0	0
ENSMUSG00002075940			9	84	0.5	0	0	0	0	0	0
ENSMUSG00001118671			8	92	0.380435	0	0	0	0	0	0
ENSMUSG00002076306			5	95	0.315789	0	0	3	0	0	0
ENSMUSG00002074848			18	96	0.416667	0	0	0	0	0	0
ENSMUSG00002076308			9	107	0.327103	0	0	0	0	0	0
ENSMUSG00002074850			5	117	0.649573	0	0	0	0	0	0
ENSMUSG00002074851			1	53	0.679245	0	0	0	2	0	0
ENSMUSG00002074852			2	167	0.371257	0	0	0	0	0	0
ENSMUSG00002075948			10	263	0.311787	0	0	7	0	0	0
ENSMUSG00002076677			13	114	0.473684	0	0	0	0	0	0
ENSMUSG00002075950			1	77	0.363636	0	0	0	0	0	0
ENSMUSG00002076557			3	106	0.556604	0	0	0	0	0	0
ENSMUSG00002075952			4	96	0.489583	4	5	0	0	12	0
ENSMUSG00002075953			11	69	0.550725	0	0	0	0	0	0
ENSMUSG00002075954			4	95	0.389474	0	0	0	0	0	0
ENSMUSG00002074860			7	121	0.495868	0	0	0	0	0	0
ENSMUSG00002075956			8	75	0.44	0	0	0	0	0	0
ENSMUSG00000118901			12	132	0.484848	0	0	0	0	0	0
ENSMUSG00002074861			5	126	0.626984	0	0	0	0	0	0
ENSMUSG00002076807			2	83	0.373494	3	0	2	0	0	0
ENSMUSG00002075960			2	127	0.433071	0	0	0	0	0	0
ENSMUSG00002074866			7	105	0.542857	0	1	0	0	0	0
ENSMUSG00002076326			11	115	0.6	0	0	0	0	0	0
ENSMUSG00002075963			6	143	0.552448	0	2	1	0	0	5
ENSMUSG00002074868			2	102	0.5	0	0	0	0	6	3
ENSMUSG00002076329			13	144	0.659722	0	0	0	0	0	0
ENSMUSG00000096756			JH584297.1	1446	0.466113	0	0	0	0	0	0
ENSMUSG00002075967			1	110	0.327273	0	0	0	0	0	0
ENSMUSG00002076453			15	60	0.633333	0	0	0	0	0	0
ENSMUSG00002074874			2	67	0.313433	0	0	0	0	0	0
ENSMUSG00002075970			17	81	0.530864	0	0	0	0	0	0
ENSMUSG00002075971			18	84	0.547619	0	0	0	0	0	0
ENSMUSG00002076336			5	111	0.585586	0	0	0	0	0	0
ENSMUSG00002075973			11	80	0.55	0	0	0	0	0	0
ENSMUSG00002074879			11	115	0.313043	0	0	0	0	0	0
ENSMUSG00000119464			8	92	0.380435	0	0	0	0	0	0
ENSMUSG00002076097			2	121	0.471074	0	0	0	0	0	0
ENSMUSG00002075977			X	94	0.542553	0	0	0	0	0	0
ENSMUSG00002075978			15	129	0.534884	0	0	0	0	0	0
ENSMUSG00002075979			7	110	0.609091	0	0	0	0	0	2
ENSMUSG00002075980			1	141	0.64539	0	0	0	0	0	0
ENSMUSG00002075981			16	126	0.603175	0	0	0	0	0	0
ENSMUSG00002075982			8	101	0.267327	0	0	0	0	0	0
ENSMUSG00002076711			17	96	0.677083	0	0	0	0	1	0
ENSMUSG00002076105			1	125	0.576	0	0	0	0	0	0
ENSMUSG00002076470			16	133	0.503759	0	0	0	0	0	0
ENSMUSG00002075986			X	128	0.671875	0	0	0	0	0	0
ENSMUSG00000090395			12	278	0.503597	0	0	0	0	0	0
ENSMUSG00002074893			7	110	0.572727	0	0	0	0	0	0
ENSMUSG00002076110			3	66	0.363636	0	0	0	0	0	0
ENSMUSG00002075990			2	143	0.594406	0	0	0	0	0	0
ENSMUSG00002075991			19	132	0.333333	0	0	0	0	0	0
ENSMUSG00002075992			1	110	0.554545	0	0	0	0	0	0
ENSMUSG00002076357			8	110	0.627273	0	0	0	0	0	0
ENSMUSG00002074898			6	230	0.430435	0	0	0	0	0	0
ENSMUSG00002076359			18	128	0.421875	0	0	0	0	0	0
ENSMUSG00002076724			2	120	0.425	0	0	12	0	3	0
ENSMUSG00002076118			6	97	0.391753	0	0	0	0	0	0
ENSMUSG00000119857			14	132	0.424242	0	0	0	0	0	0
ENSMUSG00002076120			X	110	0.6	0	0	0	0	0	0
ENSMUSG00002076849			2	121	0.396694	0	0	0	0	0	0
ENSMUSG00002076001			12	112	0.294643	0	0	0	0	0	0
ENSMUSG00002076123			3	128	0.453125	0	0	0	0	0	0
ENSMUSG00002076003			9	153	0.163399	0	0	0	0	0	0
ENSMUSG00000095666			JH584296.1	1446	0.465422	0	0	0	0	0	0
ENSMUSG00002076126			13	70	0.442857	0	0	0	0	0	0
ENSMUSG00002076490			10	72	0.333333	0	0	0	0	0	0
ENSMUSG00002076492			15	54	0.666667	0	0	0	0	0	0
ENSMUSG00002076250			12	139	0.460432	0	3	0	0	0	0
ENSMUSG00002076251			15	60	0.633333	0	0	0	0	0	0
ENSMUSG00000119329			X	143	0.475524	0	0	0	0	0	0
ENSMUSG00000119872			3	132	0.492424	0	0	0	0	0	0
ENSMUSG00002076740			9	79	0.493671	0	0	0	0	0	0
ENSMUSG00002076659			X	106	0.669811	0	0	0	0	0	0
ENSMUSG00002076014			2	79	0.468354	0	0	0	0	0	0
ENSMUSG00002076621			3	100	0.28	0	0	0	0	0	0
ENSMUSG00002076016			9	90	0.366667	0	0	0	0	0	0
ENSMUSG00002076017			6	110	0.554545	0	0	0	0	0	0
ENSMUSG00000119525			2	136	0.455882	0	0	0	0	0	0
ENSMUSG00002076140			2	114	0.421053	0	0	0	0	0	0
ENSMUSG00000095500			GL456221.1	291	0.450172	0	0	0	0	0	0
ENSMUSG00002076385			16	84	0.5	0	0	0	0	0	0
ENSMUSG00002076386			3	92	0.413043	0	0	0	0	0	0
ENSMUSG00002076023			6	101	0.49505	0	0	0	0	0	0
ENSMUSG00002076024			11	118	0.491525	0	1	14	0	0	3
ENSMUSG00002076389			17	74	0.554054	1	3	0	2	4	1
ENSMUSG00002076390			7	121	0.495868	0	0	0	0	0	0
ENSMUSG00002076755			6	110	0.509091	0	0	0	1	3	0
ENSMUSG00002076028			8	112	0.142857	0	0	0	0	0	0
ENSMUSG00002076150			7	96	0.4375	0	0	0	0	4	0
ENSMUSG00000118653		ubiquitin-conjugating enzyme E2S (Ube2s) retrogene	9	988	0.574899	17	17	3	9	14	19
ENSMUSG00000118528		novel protein	10	129	0.612403	0	0	0	0	0	0
ENSMUSG00002076517			4	115	0.626087	0	0	0	0	0	0
ENSMUSG00000118657		keratin associated protein 10 like (KRTAP10) pseudogene	4	118	0.59322	0	0	0	0	0	1
ENSMUSG00002076034			17	67	0.656716	0	0	0	0	0	0
ENSMUSG00002076763			19	122	0.557377	0	0	0	0	0	0
ENSMUSG00000118660		novel pseudogene, ortholog of ZNF660	9	990	0.457576	0	0	0	0	0	0
ENSMUSG00000118661		mucin 6, gastric [Source:NCBI gene (formerly Entrezgene);Acc:353328]	7	15593	0.529661	8	2	3	0	0	1
ENSMUSG00002076523			7	121	0.479339	0	0	0	0	0	0
ENSMUSG00002076281			2	170	0.441176	0	5	0	0	0	0
ENSMUSG00002076040			5	132	0.469697	0	0	0	0	0	0
ENSMUSG00002076405			13	249	0.48996	0	0	0	0	0	0
ENSMUSG00002076890			GL456381.1	99	0.505051	0	0	0	0	0	0
ENSMUSG00002076649			15	126	0.309524	0	0	0	0	0	10
ENSMUSG00002076408			15	60	0.616667	0	0	0	0	0	0
ENSMUSG00000119569			X	114	0.403509	0	0	0	0	0	0
ENSMUSG00000094383			JH584299.1	1482	0.469636	0	0	0	0	0	0
ENSMUSG00002076896			11	193	0.544041	0	0	0	0	0	0
ENSMUSG00002076776			6	378	0.5	0	0	0	0	0	0
ENSMUSG00002076049			8	133	0.43609	0	0	0	0	0	0
ENSMUSG00000119932			X	114	0.403509	0	0	0	0	0	0
ENSMUSG00002076172			2	123	0.333333	0	0	0	0	0	0
ENSMUSG00002076900			6	83	0.493976	0	0	0	0	0	0
ENSMUSG00002076093			4	110	0.627273	0	0	0	0	0	0
ENSMUSG00002076054			X	71	0.394366	0	0	0	0	3	0
ENSMUSG00002076297			2	122	0.532787	0	0	0	0	0	0
ENSMUSG00000096244		vomeronasal 1 receptor Vmn1r187 [Source:NCBI gene (formerly Entrezgene);Acc:100039499]	GL456219.1	903	0.433001	0	0	0	0	0	0
ENSMUSG00002076785			2	125	0.576	0	0	0	0	0	0
ENSMUSG00000118555		novel zinc finger pseudogene	7	1816	0.35793	2	1	12	2	5	2
ENSMUSG00002076422			2	124	0.33871	0	0	0	0	0	0
ENSMUSG00002076545			10	193	0.466321	0	0	0	0	0	0
ENSMUSG00002076425			19	109	0.587156	0	0	0	0	0	0
ENSMUSG00002076062			2	95	0.305263	1	2	1	0	9	1
ENSMUSG00002076427			11	173	0.618497	0	0	0	0	0	0
ENSMUSG00002076064			2	95	0.347368	0	0	0	0	2	0
ENSMUSG00002076429			5	96	0.489583	0	0	0	0	0	0
ENSMUSG00000094874			GL456221.1	366	0.483607	0	0	0	0	0	0
ENSMUSG00002076067			8	110	0.609091	0	0	0	0	2	0
ENSMUSG00002076432			8	121	0.479339	0	0	0	0	0	3
ENSMUSG00002076433			14	103	0.417476	0	0	0	0	0	0
ENSMUSG00002076434			16	72	0.569444	0	0	0	0	0	0
ENSMUSG00002076071			9	84	0.261905	0	0	0	0	0	0
ENSMUSG00002076556			11	236	0.504237	0	0	0	0	0	0
ENSMUSG00002076437			2	125	0.584	1	0	0	0	8	2
ENSMUSG00002076074			2	201	0.422886	0	0	0	0	0	0
ENSMUSG00000094887			JH584299.1	2515	0.415507	0	0	0	0	0	0
ENSMUSG00002076197			18	156	0.570513	0	0	4	5	1	0
ENSMUSG00002076441			4	101	0.514851	0	0	0	0	0	0
ENSMUSG00002076806			15	60	0.65	0	0	0	0	0	0
ENSMUSG00000119619			2	136	0.441176	0	0	0	0	0	0
ENSMUSG00002076241			3	110	0.618182	0	0	0	0	0	0
ENSMUSG00002076929			X	169	0.502959	0	0	0	0	0	0
ENSMUSG00002076446			10	93	0.344086	0	0	0	0	0	0
ENSMUSG00002076932			2	68	0.808824	0	0	0	0	0	0
ENSMUSG00000119090			9	132	0.507576	0	0	0	0	0	0
ENSMUSG00000119635			12	132	0.454545	0	0	0	0	0	0
ENSMUSG00002076086			6	186	0.333333	0	1	0	2	2	0
ENSMUSG00000118588		serine (or cysteine) peptidase inhibitor, clade A, member 3G (Serpina3g) pseudogene	12	1170	0.498291	0	0	0	0	0	0
ENSMUSG00002076816			17	135	0.540741	0	0	0	0	0	0
ENSMUSG00002076938			9	115	0.53913	0	0	0	0	0	0
ENSMUSG00002076939			1	176	0.539773	0	0	0	0	0	0
ENSMUSG00000119274			16	132	0.431818	0	0	0	0	0	0
ENSMUSG00002076092			12	85	0.529412	0	0	0	0	0	0
ENSMUSG00002076982			10	108	0.490741	0	0	0	0	0	0
ENSMUSG00002076458			9	76	0.473684	0	0	0	0	0	0
ENSMUSG00002076459			12	115	0.391304	0	0	0	0	0	0
ENSMUSG00000118597		solute carrier organic anion transporter family, member 1b2 (Slco1b2) pseudogene	6	476	0.357143	0	0	0	0	0	0
ENSMUSG00002076218			1	216	0.509259	0	0	0	0	0	0
ENSMUSG00002076947			13	109	0.59633	0	0	1	0	0	0
ENSMUSG00002076099			2	104	0.394231	0	0	0	0	0	0
ENSMUSG00000118600		novel protein	2	99	0.444444	0	0	0	0	0	0
ENSMUSG00002076101			15	111	0.558559	0	0	0	0	0	0
ENSMUSG00002076466			5	74	0.554054	0	0	0	0	0	0
ENSMUSG00002076103			X	91	0.406593	0	0	0	0	0	0
ENSMUSG00000118753			2	132	0.477273	0	0	0	0	13	0
ENSMUSG00002076590			9	104	0.509615	0	0	0	0	0	0
ENSMUSG00002074888			12	72	0.541667	0	0	0	0	0	0
ENSMUSG00002076471			9	130	0.523077	0	0	0	0	0	0
ENSMUSG00002076593			19	79	0.544304	0	0	0	0	0	0
ENSMUSG00002076958			12	65	0.446154	0	0	0	0	0	0
ENSMUSG00000094514			GL456211.1	366	0.415301	0	0	0	0	0	0
ENSMUSG00002076475			1	80	0.575	0	0	0	0	0	0
ENSMUSG00002076112			5	127	0.496063	0	0	0	0	0	0
ENSMUSG00000119487			6	132	0.469697	0	0	0	0	0	0
ENSMUSG00002076114			X	111	0.135135	0	0	0	0	0	0
ENSMUSG00000119133			11	134	0.514925	0	0	0	0	0	0
ENSMUSG00002076116			2	102	0.372549	0	4	0	0	0	0
ENSMUSG00002076481			10	132	0.462121	0	0	0	0	0	0
ENSMUSG00000119855			8	92	0.369565	0	0	0	0	0	0
ENSMUSG00002076846			9	110	0.627273	0	0	0	0	0	0
ENSMUSG00002076887			2	121	0.413223	0	0	0	0	0	0
ENSMUSG00002076606			10	126	0.436508	0	0	0	0	0	0
ENSMUSG00002076243			10	95	0.547368	0	7	0	8	10	2
ENSMUSG00002076244			14	137	0.518248	0	0	0	0	0	1
ENSMUSG00002076124			8	84	0.5	0	0	0	0	0	0
ENSMUSG00002075153			4	82	0.573171	3	1	0	0	0	1
ENSMUSG00000118786			6	132	0.515152	0	0	0	0	0	0
ENSMUSG00002076975			14	124	0.475806	0	0	0	0	1	0
ENSMUSG00002076613			6	105	0.47619	0	0	0	0	0	0
ENSMUSG00002076856			11	104	0.788462	0	0	0	0	0	0
ENSMUSG00000095250			GL456211.1	366	0.480874	0	0	0	0	0	0
ENSMUSG00002076777			6	89	0.831461	0	0	0	0	0	0
ENSMUSG00000119391			3	131	0.465649	0	0	0	0	0	0
ENSMUSG00002076577			2	127	0.393701	0	0	0	0	0	0
ENSMUSG00002076578			4	68	0.602941	6	1	4	5	2	13
ENSMUSG00002076863			10	115	0.452174	0	0	0	0	0	0
ENSMUSG00002076984			11	101	0.465347	0	0	0	0	0	0
ENSMUSG00002076177			3	121	0.495868	0	0	0	0	0	0
ENSMUSG00002076138			13	89	0.550562	0	0	0	0	0	0
ENSMUSG00002076139			8	122	0.52459	0	0	0	0	0	0
ENSMUSG00002076625			8	108	0.407407	0	0	0	0	0	0
ENSMUSG00000118642			17	714	0.684874	0	0	0	0	0	0
ENSMUSG00002076142			9	111	0.630631	0	0	0	0	0	0
ENSMUSG00002076143			X	66	0.545455	0	0	0	0	0	0
ENSMUSG00002076508			15	182	0.565934	0	0	0	0	0	0
ENSMUSG00002076145			11	89	0.314607	2	0	0	0	0	0
ENSMUSG00000094337			GL456354.1	1446	0.462656	0	0	0	0	0	0
ENSMUSG00000118649		defensin beta 119 (Defb119) pseudogene	2	126	0.47619	0	0	0	0	0	0
ENSMUSG00000119733			5	132	0.545455	11	11	8	0	0	7
ENSMUSG00000095041			JH584304.1	4238	0.52336	1309	1407	2302	1209	1011	982
ENSMUSG00000119901			12	132	0.454545	0	0	0	0	0	0
ENSMUSG00000119548			7	132	0.469697	0	0	0	0	0	0
ENSMUSG00002076516			5	117	0.273504	0	0	0	0	0	0
ENSMUSG00002076638			10	96	0.739583	0	0	0	0	0	0
ENSMUSG00000118654		tudor domain containing 10 (TDRD10) pseudogene	3	87	0.517241	0	0	0	0	0	0
ENSMUSG00000095728			JH584298.1	1218	0.484401	0	0	0	0	0	0
ENSMUSG00002076156			8	101	0.49505	0	0	0	0	0	0
ENSMUSG00000119196			14	132	0.477273	0	0	0	0	0	0
ENSMUSG00002076643			13	107	0.672897	0	0	0	0	0	0
ENSMUSG00002076644			18	110	0.627273	0	0	0	0	0	0
ENSMUSG00000117546		TEC	17	2455	0.472505	18	9	9	22	15	8
ENSMUSG00002076889			11	80	0.575	0	0	0	0	0	0
ENSMUSG00002076526			15	60	0.566667	0	0	0	0	0	0
ENSMUSG00000108639		olfactory receptor 1400, pseudogene 1	12	908	0.387665	0	0	0	0	0	0
ENSMUSG00000118905			5	71	0.492958	0	1	6	1	8	1
ENSMUSG00002076165			3	102	0.5	0	0	0	0	0	0
ENSMUSG00002075921			9	128	0.585938	0	0	0	0	0	0
ENSMUSG00000094836			JH584299.1	1080	0.438889	0	0	0	0	0	0
ENSMUSG00002076572			8	88	0.363636	0	0	0	0	0	0
ENSMUSG00002076169			6	141	0.64539	6	4	0	2	8	5
ENSMUSG00000074720			GL456354.1	486	0.436214	0	0	0	0	0	0
ENSMUSG00002074872			8	89	0.370787	0	0	0	0	0	0
ENSMUSG00000117357		translocase of outer mitochondrial membrane 20 (Tomm20) pseudogene	18	1790	0.42514	0	0	0	0	0	0
ENSMUSG00000119573			12	132	0.454545	0	0	0	0	0	0
ENSMUSG00002076739			2	107	0.654206	0	0	0	0	0	0
ENSMUSG00001074846		IQ motif containing F3 [Source:NCBI gene (formerly Entrezgene);Acc:68265]	9	1149	0.497824	0	0	0	0	0	0
ENSMUSG00000094855			JH584299.1	1446	0.473029	0	0	0	0	0	0
ENSMUSG00002076217			12	68	0.544118	0	0	0	0	0	0
ENSMUSG00000119226			2	132	0.424242	0	0	0	0	0	0
ENSMUSG00002076300			11	121	0.487603	0	0	0	0	0	0
ENSMUSG00002076664			11	84	0.488095	0	0	0	0	0	0
ENSMUSG00000119052			16	133	0.496241	0	0	0	0	0	0
ENSMUSG00002076546			X	83	0.421687	1	0	2	2	0	0
ENSMUSG00002076911			10	76	0.592105	0	0	0	0	1	0
ENSMUSG00000118697			10	132	0.484848	0	0	0	0	0	0
ENSMUSG00002076913			16	110	0.618182	0	0	0	0	0	0
ENSMUSG00002076186			6	361	0.559557	0	0	0	0	0	0
ENSMUSG00002076187			11	85	0.282353	0	0	0	0	0	0
ENSMUSG00000118700			15	132	0.454545	0	0	0	0	0	0
ENSMUSG00000119779			8	132	0.431818	0	0	0	0	0	0
ENSMUSG00002076311			13	170	0.441176	0	1	0	1	10	0
ENSMUSG00002075827			13	98	0.591837	0	0	0	0	0	0
ENSMUSG00002076192			7	110	0.627273	0	0	0	0	0	0
ENSMUSG00000118943			9	132	0.431818	0	0	0	0	0	0
ENSMUSG00000119783			9	144	0.493056	0	0	0	0	0	0
ENSMUSG00000118714			2	132	0.439394	0	0	0	0	0	0
ENSMUSG00002076196			13	138	0.666667	0	0	0	0	0	0
ENSMUSG00002076318			6	256	0.492188	2	0	0	3	1	4
ENSMUSG00000119256			3	132	0.462121	0	0	0	0	0	0
ENSMUSG00002076684			X	98	0.408163	0	0	0	0	0	0
ENSMUSG00002076805			4	127	0.480315	0	0	0	0	0	0
ENSMUSG00000118410		zinc finger protein 75a (ZNF75A) pseudogene	16	786	0.428753	5	12	15	1	5	12
ENSMUSG00000119140			3	105	0.485714	0	0	0	0	0	0
ENSMUSG00002076324			7	80	0.4875	0	0	0	0	0	0
ENSMUSG00002076607			X	121	0.495868	0	0	0	0	0	0
ENSMUSG00002076690			12	71	0.492958	0	0	0	0	0	0
ENSMUSG00002076206			6	187	0.620321	73	45	78	13	17	42
ENSMUSG00002076571			13	101	0.247525	0	0	0	0	0	0
ENSMUSG00000118624		discs, large homolog 5 (Drosophila) (Dlg5) pseudogene	14	300	0.476667	0	0	0	0	0	0
ENSMUSG00002076937			3	127	0.511811	0	0	0	0	0	0
ENSMUSG00002076331			16	121	0.479339	0	0	0	0	0	0
ENSMUSG00000094303			JH584297.1	1218	0.469622	0	0	0	0	0	0
ENSMUSG00000119215			2	136	0.448529	0	0	0	0	0	0
ENSMUSG00002076695			12	83	0.650602	3	2	6	0	3	0
ENSMUSG00002076940			8	57	0.684211	0	0	0	0	0	0
ENSMUSG00002076215			7	98	0.438776	0	0	0	0	0	0
ENSMUSG00002076944			2	127	0.393701	0	0	0	0	0	0
ENSMUSG00002076337			2	127	0.409449	0	0	1	0	0	0
ENSMUSG00002076824			13	126	0.571429	0	0	0	0	0	0
ENSMUSG00002076704			13	109	0.59633	0	0	0	0	0	0
ENSMUSG00002076220			19	109	0.321101	0	0	0	0	0	0
ENSMUSG00002076583			2	123	0.504065	0	0	0	0	0	0
ENSMUSG00002076586			12	98	0.265306	0	0	0	0	0	0
ENSMUSG00000118925			13	133	0.43609	0	2	0	0	0	0
ENSMUSG00002076224			15	105	0.361905	0	0	0	0	0	0
ENSMUSG00002076467			10	67	0.38806	0	0	1	0	0	0
ENSMUSG00002074887			14	121	0.495868	0	0	0	0	0	0
ENSMUSG00002076469			2	64	0.546875	0	0	0	0	0	0
ENSMUSG00000079222			GL456221.1	1205	0.453112	0	0	0	0	0	0
ENSMUSG00002076714			9	105	0.561905	0	0	0	0	0	0
ENSMUSG00002076715			10	129	0.387597	0	0	0	0	0	0
ENSMUSG00002076716			12	70	0.571429	0	0	0	0	0	0
ENSMUSG00000119485			9	72	0.430556	0	0	0	0	0	0
ENSMUSG00002076637			6	125	0.704	0	0	0	0	0	0
ENSMUSG00002076476			17	126	0.587302	0	0	0	0	0	0
ENSMUSG00000118946			7	132	0.44697	0	0	0	0	0	0
ENSMUSG00002076236			1	102	0.5	0	0	0	0	0	0
ENSMUSG00002076237			6	466	0.55794	55	17	54	5	25	1
ENSMUSG00002076965			10	204	0.382353	0	0	0	0	0	0
ENSMUSG00000118659		novel transcript	3	737	0.443691	0	0	0	0	0	0
ENSMUSG00002076561			8	58	0.37931	0	0	0	0	0	0
ENSMUSG00002074859			5	89	0.41573	0	0	0	0	0	0
ENSMUSG00002076645			16	60	0.533333	0	0	0	0	0	0
ENSMUSG00002076970			3	138	0.173913	0	0	0	0	0	0
ENSMUSG00000119029			16	132	0.5	0	0	0	0	0	0
ENSMUSG00002076245			14	168	0.589286	0	0	0	0	0	0
ENSMUSG00002076488			15	109	0.623853	0	0	0	0	0	0
ENSMUSG00000118625		polycystic kidney disease 2 (Pkd2) pseudogene	5	475	0.364211	5	19	1	4	2	4
ENSMUSG00000115115		novel protein	4	78	0.564103	0	0	0	0	0	0
ENSMUSG00000119150			11	132	0.477273	0	0	0	0	0	0
ENSMUSG00000118627		IMP3, U3 small nucleolar ribonucleoprotein, homolog (yeast) (Imp3) pseudogene	5	544	0.617647	0	0	0	0	0	0
ENSMUSG00000119270			5	123	0.479675	0	0	0	0	0	0
ENSMUSG00002076817			16	106	0.349057	0	0	0	0	0	0
ENSMUSG00002076266			9	121	0.495868	0	0	0	0	0	0
ENSMUSG00000095763			JH584299.1	1446	0.464039	0	0	0	0	0	0
ENSMUSG00002076699			2	125	0.688	0	0	0	0	0	0
ENSMUSG00002076620			8	104	0.615385	0	0	0	0	0	0
ENSMUSG00002076942			2	121	0.429752	0	0	0	0	0	0
ENSMUSG00001118660			6	129	0.488372	0	0	0	0	0	0
ENSMUSG00002076987			12	110	0.572727	0	0	0	0	0	0
ENSMUSG00002076624			5	106	0.613208	0	0	0	0	1	0
ENSMUSG00000095019			JH584303.1	1083	0.430286	0	0	0	0	0	0
ENSMUSG00002076990			11	135	0.666667	0	0	0	0	0	0
ENSMUSG00000094791			JH584299.1	837	0.467145	0	0	0	0	0	0
ENSMUSG00000091585			JH584299.1	1500	0.468667	0	0	0	0	0	0
ENSMUSG00000118999			12	132	0.484848	0	0	0	0	0	0
ENSMUSG00002076683			8	109	0.669725	2	1	10	2	7	0
ENSMUSG00000118396		IQ motif containing F3 [Source:NCBI gene (formerly Entrezgene);Acc:68265]	9	2668	0.504498	0	0	0	0	0	0
ENSMUSG00000119355			11	134	0.507463	0	0	0	0	0	0
ENSMUSG00000119544			19	93	0.419355	0	0	0	0	0	0
ENSMUSG00000094799			GL456210.1	366	0.486339	0	0	0	0	0	0
ENSMUSG00000118650		zinc finger protein 445 (Zfp44) pseudogene	X	417	0.484412	0	0	0	0	0	0
ENSMUSG00002076878			9	88	0.761364	0	0	0	0	0	0
ENSMUSG00002074853			1	140	0.485714	0	0	0	0	0	0
ENSMUSG00002076759			8	84	0.5	0	0	0	0	0	0
ENSMUSG00000096680			JH584296.1	1443	0.47124	0	0	0	0	0	0
ENSMUSG00002076761			13	110	0.618182	0	0	0	0	0	0
ENSMUSG00000090765			12	294	0.455782	0	0	0	0	0	0
ENSMUSG00000095523			JH584299.1	1446	0.464039	0	0	0	0	0	0
ENSMUSG00000119804			14	105	0.457143	0	0	0	0	0	0
ENSMUSG00000119737			13	133	0.43609	0	0	0	0	0	0
ENSMUSG00002074858			13	113	0.39823	0	0	0	0	0	0
ENSMUSG00002076672			5	126	0.579365	0	0	0	0	0	0
ENSMUSG00002076647			2	126	0.587302	0	0	1	0	0	3
ENSMUSG00002076310			13	110	0.427273	0	0	0	0	0	0
ENSMUSG00002076810			1	121	0.495868	0	0	0	0	0	0
ENSMUSG00002076286			12	160	0.55	0	0	0	0	0	0
ENSMUSG00002076772			11	99	0.454545	6	0	0	0	0	0
ENSMUSG00000117965		novel protein	10	204	0.490196	0	0	0	0	0	0
ENSMUSG00002076814			8	143	0.524476	0	0	0	0	0	0
ENSMUSG00000119093			2	132	0.431818	0	0	0	0	0	0
ENSMUSG00000119806			2	136	0.441176	0	0	0	0	0	0
ENSMUSG00002076830			11	146	0.30137	0	0	0	0	0	0
ENSMUSG00002076548			6	110	0.409091	0	0	0	0	0	0
ENSMUSG00002076307			7	70	0.6	0	0	0	0	0	0
ENSMUSG00002076953			9	95	0.473684	0	0	0	0	0	0
ENSMUSG00002076457			9	107	0.420561	0	0	0	0	0	0
ENSMUSG00000119858			5	132	0.409091	0	0	0	0	0	0
ENSMUSG00002076338			15	60	0.566667	0	0	0	0	0	0
ENSMUSG00002076541			10	89	0.382022	0	0	0	0	0	0
ENSMUSG00002076906			18	111	0.153153	8	2	4	3	0	0
ENSMUSG00002076341			6	97	0.494845	0	0	0	0	0	0
ENSMUSG00002075693			16	102	0.460784	0	0	0	1	0	1
ENSMUSG00002076667			2	127	0.401575	0	0	1	0	0	0
ENSMUSG00002076789			3	110	0.627273	0	0	0	0	0	0
ENSMUSG00002076924			7	154	0.357143	0	0	0	0	0	0
ENSMUSG00000119491			9	72	0.402778	0	0	0	0	0	0
ENSMUSG00000119291			9	132	0.454545	0	0	0	0	0	0
ENSMUSG00000117901		novel transcript, antisense to Macrod1	19	953	0.529906	44	36	53	59	37	54
ENSMUSG00002076309			16	78	0.5	0	0	0	0	0	0
ENSMUSG00002076941			5	83	0.385542	0	0	0	0	0	0
ENSMUSG00002076796			7	96	0.34375	0	0	0	0	0	0
ENSMUSG00002076676			13	110	0.627273	0	0	0	0	0	0
ENSMUSG00000119128			3	85	0.423529	0	0	0	0	0	0
ENSMUSG00002076839			6	204	0.568627	0	0	0	0	0	0
ENSMUSG00002076920			Y	60	0.533333	0	0	0	0	0	0
ENSMUSG00002076191			12	205	0.55122	0	0	0	0	0	0
ENSMUSG00002076317			2	77	0.272727	0	0	0	0	0	0
ENSMUSG00002076246			7	96	0.53125	0	0	0	0	0	0
ENSMUSG00000119268			13	132	0.44697	0	0	0	0	0	0
ENSMUSG00000119846			2	132	0.44697	0	0	0	0	0	0
ENSMUSG00000119192			3	130	0.507692	0	0	0	0	0	0
ENSMUSG00000105705		anaphase-promoting complex subunit 5 pseudogene	5	1107	0.506775	0	0	0	0	0	0
ENSMUSG00000119662			11	144	0.506944	0	0	0	0	0	0
ENSMUSG00000119666			9	72	0.416667	0	0	0	0	0	0
ENSMUSG00000118777			3	131	0.442748	0	0	0	0	0	0
ENSMUSG00000119445			3	130	0.5	0	0	0	0	0	0
ENSMUSG00002076691			10	80	0.4375	0	0	0	0	0	0
ENSMUSG00002076852			19	152	0.592105	0	0	0	0	0	0
ENSMUSG00002076973			15	175	0.445714	0	0	0	0	0	0
ENSMUSG00002076854			6	80	0.4125	0	0	0	0	0	0
ENSMUSG00002076465			11	96	0.510417	0	0	0	0	0	0
ENSMUSG00002076870			15	157	0.477707	0	0	0	0	0	0
ENSMUSG00000095787			GL456211.1	372	0.502688	0	0	0	0	0	0
ENSMUSG00000079808			GL456212.1	1910	0.496859	0	0	0	0	5	0
ENSMUSG00002076751			5	99	0.505051	0	0	0	0	0	0
ENSMUSG00000119179			6	132	0.431818	0	0	0	0	0	0
ENSMUSG00002076753			2	123	0.333333	0	0	0	0	0	0
ENSMUSG00002076943			16	74	0.527027	0	0	0	0	0	0
ENSMUSG00002076581			3	67	0.38806	1	0	0	0	0	0
ENSMUSG00000117238		novel transcript	7	7600	0.405395	2	3	0	0	3	3
ENSMUSG00002076745			15	129	0.604651	0	0	0	0	0	0
ENSMUSG00002076463			11	111	0.576577	14	5	22	32	6	4
ENSMUSG00002076343			10	110	0.609091	0	0	0	0	0	0
ENSMUSG00002076721			7	195	0.584615	1	0	1	0	0	0
ENSMUSG00000096808			GL456221.1	1500	0.382667	0	0	0	0	0	0
ENSMUSG00002076398			1	124	0.572581	0	0	0	0	0	0
ENSMUSG00002076802			11	80	0.5375	0	0	7	0	0	0
ENSMUSG00002074884			12	60	0.666667	0	0	0	0	0	0
ENSMUSG00000079800			GL456210.1	1271	0.461054	0	0	0	0	0	0
ENSMUSG00002076912			12	115	0.286957	0	0	0	0	0	0
ENSMUSG00000119005			14	132	0.416667	0	0	0	0	0	0
ENSMUSG00002076674			17	145	0.57931	0	0	4	0	0	0
ENSMUSG00002076797			6	151	0.437086	1	1	1	2	11	0
ENSMUSG00000118652		novel transcript	13	358	0.513966	0	0	0	0	0	0
ENSMUSG00002076718			7	121	0.479339	0	0	0	0	0	0
ENSMUSG00002076650			11	216	0.527778	0	0	0	0	0	0
ENSMUSG00002076935			13	70	0.442857	0	0	0	0	1	0
ENSMUSG00002076934			2	110	0.572727	0	0	0	0	0	0
ENSMUSG00002076909			8	69	0.492754	0	0	0	0	0	0
ENSMUSG00000119114			6	56	0.5	0	0	0	0	0	0
ENSMUSG00002076949			10	95	0.505263	0	0	0	0	0	0
ENSMUSG00002074883			19	115	0.4	0	0	0	0	0	0
ENSMUSG00000118744			5	71	0.492958	0	8	0	5	0	0
ENSMUSG00000096728			GL456354.1	1446	0.482019	0	0	0	0	0	0
ENSMUSG00002074875			10	214	0.462617	0	0	0	0	0	0
ENSMUSG00000119144			4	83	0.481928	2	3	8	0	7	5
ENSMUSG00002076609			10	137	0.452555	0	0	0	0	0	0
ENSMUSG00002076529			6	109	0.642202	0	0	0	0	0	0
ENSMUSG00000119884			8	132	0.5	0	0	0	0	0	0
ENSMUSG00002076867			13	83	0.361446	0	0	0	0	0	0
ENSMUSG00000118641		Zinc finger protein 974 (Zfp974) pseudogene	7	57	0.403509	0	0	0	0	0	0
ENSMUSG00000118513		renalase, FAD-dependent amine oxidase (Rnls) pseudogene	19	350	0.491429	0	0	0	0	0	0
ENSMUSG00002076793			10	101	0.49505	0	0	0	0	0	0
ENSMUSG00002076478			14	91	0.373626	0	0	0	0	0	0
ENSMUSG00000119191			10	132	0.530303	0	0	0	0	0	0
ENSMUSG00002076948			12	100	0.59	0	0	0	0	0	2
ENSMUSG00002076905			5	83	0.421687	0	0	0	0	0	0
ENSMUSG00002076431			15	129	0.573643	0	0	0	0	0	0
ENSMUSG00000119649			4	83	0.481928	18	7	13	5	31	8
ENSMUSG00002074878			17	109	0.633028	0	0	0	0	0	0
ENSMUSG00000094054			GL456211.1	891	0.484848	0	0	0	0	0	0
ENSMUSG00002076880			8	91	0.417582	0	0	0	0	0	0
ENSMUSG00002076866			3	117	0.512821	0	0	0	0	0	0
ENSMUSG00002076518			6	128	0.648438	0	0	0	0	0	0
ENSMUSG00002076794			2	102	0.5	0	0	0	0	0	0
ENSMUSG00002076831			6	59	0.694915	0	0	0	0	0	0
ENSMUSG00000118647		calmodulin-like 6 (CALML6) pseudogene	4	224	0.517857	0	0	0	0	0	0
ENSMUSG00002076673			2	77	0.532468	0	0	0	0	0	0
ENSMUSG00002076584			17	125	0.592	0	0	0	0	0	0
ENSMUSG00000119610			15	132	0.469697	0	0	0	0	0	0
ENSMUSG00002076812			X	102	0.5	0	0	0	0	0	0
ENSMUSG00000115798		novel protein	15	213	0.549296	0	0	0	0	0	0
ENSMUSG00000118645			6	480	0.49375	0	0	0	0	0	0
ENSMUSG00000119068			16	132	0.477273	0	0	0	0	0	0
ENSMUSG00000119087			6	132	0.477273	0	0	0	0	0	0
ENSMUSG00000119001			15	132	0.515152	0	0	0	0	0	0
ENSMUSG00002076851			X	95	0.505263	1	0	8	1	2	0
ENSMUSG00000118644		sperm antigen with calponin homology and coiled-coil domains 1 (Specc1) pseudogene	11	133	0.518797	1	1	0	12	0	5
ENSMUSG00000079794			GL456210.1	255	0.470588	0	0	0	0	0	0
ENSMUSG00002076595			13	110	0.409091	0	0	0	0	0	0
ENSMUSG00002076872			4	76	0.671053	0	0	0	0	0	0
ENSMUSG00000119065			11	132	0.424242	0	0	0	0	0	0
ENSMUSG00002076967			3	138	0.637681	0	0	0	0	0	0
ENSMUSG00000109644	0610005C13Rik	RIKEN cDNA 0610005C13 gene [Source:MGI Symbol;Acc:MGI:1918911]	7	3583	0.538934	1	0	0	0	3	0
ENSMUSG00000108652	0610006L08Rik	RIKEN cDNA 0610006L08 gene [Source:MGI Symbol;Acc:MGI:1923503]	7	2128	0.443609	2	1	0	0	0	0
ENSMUSG00000007777	0610009B22Rik	RIKEN cDNA 0610009B22 gene [Source:MGI Symbol;Acc:MGI:1913300]	11	998	0.460922	35	47	34	19	27	17
ENSMUSG00000086714	0610009E02Rik	RIKEN cDNA 0610009E02 gene [Source:MGI Symbol;Acc:MGI:3698435]	2	1803	0.501387	11	3	18	9	13	10
ENSMUSG00000043644	0610009L18Rik	RIKEN cDNA 0610009L18 gene [Source:MGI Symbol;Acc:MGI:1914088]	11	619	0.602585	24	16	14	38	12	9
ENSMUSG00000042208	0610010F05Rik	RIKEN cDNA 0610010F05 gene [Source:MGI Symbol;Acc:MGI:1918925]	11	5226	0.410065	122	105	240	94	185	111
ENSMUSG00000020831	0610010K14Rik	RIKEN cDNA 0610010K14 gene [Source:MGI Symbol;Acc:MGI:1915609]	11	1896	0.55538	0	0	1	0	1	1
ENSMUSG00000089755	0610012D04Rik	RIKEN cDNA 0610012D04 gene [Source:MGI Symbol;Acc:MGI:1918926]	17	531	0.478343	0	0	0	0	0	0
ENSMUSG00000107002	0610012G03Rik	RIKEN cDNA 0610012G03 gene [Source:MGI Symbol;Acc:MGI:1913301]	16	1445	0.545329	125	126	63	80	91	124
ENSMUSG00000046683	0610025J13Rik	RIKEN cDNA 0610025J13 gene [Source:MGI Symbol;Acc:MGI:1915618]	4	1121	0.508475	0	0	3	0	0	0
ENSMUSG00000058706	0610030E20Rik	RIKEN cDNA 0610030E20 gene [Source:MGI Symbol;Acc:MGI:1915614]	6	5832	0.48011	214	155	238	103	234	171
ENSMUSG00000099146	0610031O16Rik	RIKEN cDNA 0610031O16 gene [Source:MGI Symbol;Acc:MGI:1915619]	3	2482	0.463739	0	0	0	0	0	0
ENSMUSG00000108236	0610033M10Rik	RIKEN cDNA 0610033M10 gene [Source:MGI Symbol;Acc:MGI:1921343]	6	1102	0.490926	0	1	0	0	0	0
ENSMUSG00000097882	0610038B21Rik	RIKEN cDNA 0610038B21 gene [Source:MGI Symbol;Acc:MGI:1917595]	8	3071	0.552589	19	2	17	4	20	8
ENSMUSG00000058812	0610039K10Rik	RIKEN cDNA 0610039K10 gene [Source:MGI Symbol;Acc:MGI:1915636]	2	952	0.584034	0	0	7	0	1	2
ENSMUSG00000089889	0610040B10Rik	RIKEN cDNA 0610040B10 gene [Source:MGI Symbol;Acc:MGI:1914922]	5	2098	0.461392	8	1	9	2	11	0
ENSMUSG00000087341	0610040F04Rik	RIKEN cDNA 0610040F04 gene [Source:MGI Symbol;Acc:MGI:1922644]	6	2150	0.47814	4	5	3	17	14	1
ENSMUSG00000060512	0610040J01Rik	RIKEN cDNA 0610040J01 gene [Source:MGI Symbol;Acc:MGI:1923511]	5	2403	0.54432	7	0	14	16	5	0
ENSMUSG00000087361	0610043K17Rik	RIKEN cDNA 0610043K17 gene [Source:MGI Symbol;Acc:MGI:1915650]	4	770	0.431169	10	6	14	1	15	7
ENSMUSG00000114511	0710001A04Rik	RIKEN cDNA 0710001A04 gene [Source:MGI Symbol;Acc:MGI:1915652]	18	1345	0.437918	0	0	0	0	0	0
ENSMUSG00000097863	1010001B22Rik	RIKEN cDNA 1010001B22 gene [Source:MGI Symbol;Acc:MGI:1922653]	5	589	0.55348	0	4	2	11	10	5
ENSMUSG00000115547	1100001I12Rik	RIKEN cDNA 1100001I12 gene [Source:MGI Symbol;Acc:MGI:1922655]	15	672	0.403274	0	0	5	0	0	0
ENSMUSG00000090066	1110002E22Rik	RIKEN cDNA 1110002E22 gene [Source:MGI Symbol;Acc:MGI:1915066]	3	9998	0.4999	44	24	52	19	31	26
ENSMUSG00000097134	1110002J07Rik	RIKEN cDNA 1110002J07 gene [Source:MGI Symbol;Acc:MGI:1915738]	10	2513	0.475925	1	3	1	0	0	3
ENSMUSG00000071456	1110002L01Rik	RIKEN cDNA 1110002L01 gene [Source:MGI Symbol;Acc:MGI:1915821]	12	4131	0.468168	202	102	237	96	246	100
ENSMUSG00000102531	1110002O04Rik	RIKEN cDNA 1110002O04 gene [Source:MGI Symbol;Acc:MGI:1915733]	1	566	0.512367	0	0	0	0	0	0
ENSMUSG00000106291	1110003F10Rik	RIKEN cDNA 1110003F10 gene [Source:MGI Symbol;Acc:MGI:1915726]	5	767	0.418514	4	0	11	0	15	7
ENSMUSG00000030663	1110004F10Rik	RIKEN cDNA 1110004F10 gene [Source:MGI Symbol;Acc:MGI:1929274]	7	2490	0.473092	777	793	820	677	1024	636
ENSMUSG00000107121	1110006O24Rik	RIKEN cDNA 1110006O24 gene [Source:MGI Symbol;Acc:MGI:1913373]	5	768	0.59375	1	5	1	6	8	13
ENSMUSG00000046119	1110008E08Rik	RIKEN cDNA 1110008E08 gene [Source:MGI Symbol;Acc:MGI:1915750]	16	723	0.521438	0	0	0	0	0	0
ENSMUSG00000039195	1110008P14Rik	RIKEN cDNA 1110008P14 gene [Source:MGI Symbol;Acc:MGI:1920987]	2	2694	0.577209	83	74	115	70	129	30
ENSMUSG00000116164	1110013H19Rik	RIKEN cDNA 1110013H19 gene [Source:MGI Symbol;Acc:MGI:1915772]	15	671	0.502235	9	9	0	4	9	5
ENSMUSG00000098659	1110015O18Rik	RIKEN cDNA 1110015O18 gene [Source:MGI Symbol;Acc:MGI:1915766]	3	2035	0.335135	1	4	1	0	6	0
ENSMUSG00000028441	1110017D15Rik	RIKEN cDNA 1110017D15 gene [Source:MGI Symbol;Acc:MGI:1920971]	4	1421	0.546094	1	0	2	0	3	5
ENSMUSG00000085151	1110018N20Rik	RIKEN cDNA 1110018N20 gene [Source:MGI Symbol;Acc:MGI:1915753]	2	1579	0.51425	42	41	117	4	94	29
ENSMUSG00000112289	1110019B22Rik	RIKEN cDNA 1110019B22 gene [Source:MGI Symbol;Acc:MGI:1915779]	10	1000	0.525	0	0	0	0	0	0
ENSMUSG00000097616	1110019D14Rik	RIKEN cDNA 1110019D14 gene [Source:MGI Symbol;Acc:MGI:1923561]	6	1734	0.393887	9	8	35	36	19	9
ENSMUSG00000097047	1110020A21Rik	RIKEN cDNA 1110020A21 gene [Source:MGI Symbol;Acc:MGI:1915781]	17	1272	0.478774	12	1	13	1	2	7
ENSMUSG00000068073	1110025L11Rik	RIKEN cDNA 1110025L11 gene [Source:MGI Symbol;Acc:MGI:1915887]	16	591	0.467005	0	0	0	0	0	0
ENSMUSG00000103520	1110025M09Rik	RIKEN cDNA 1110025M09 gene [Source:MGI Symbol;Acc:MGI:1915885]	15	855	0.419883	3	4	3	1	9	2
ENSMUSG00000085972	1110028F11Rik	RIKEN cDNA 1110028F11 gene [Source:MGI Symbol;Acc:MGI:1915940]	11	976	0.484631	11	0	5	6	13	0
ENSMUSG00000099139	1110028F18Rik	RIKEN cDNA 1110028F18 gene [Source:MGI Symbol;Acc:MGI:1915942]	8	1341	0.489933	0	0	0	0	0	0
ENSMUSG00000037971	1110032A03Rik	RIKEN cDNA 1110032A03 gene [Source:MGI Symbol;Acc:MGI:1915971]	9	5293	0.47799	93	77	69	78	111	68
ENSMUSG00000046999	1110032F04Rik	RIKEN cDNA 1110032F04 gene [Source:MGI Symbol;Acc:MGI:1915975]	3	2578	0.529868	0	0	5	0	5	0
ENSMUSG00000099098	1110035H17Rik	RIKEN cDNA 1110035H17 gene [Source:MGI Symbol;Acc:MGI:1915936]	7	1241	0.591459	2	0	0	0	2	0
ENSMUSG00000092203	1110038B12Rik	RIKEN cDNA 1110038B12 gene [Source:MGI Symbol;Acc:MGI:1916013]	17	1811	0.503589	66	80	60	13	134	76
ENSMUSG00000063236	1110038F14Rik	RIKEN cDNA 1110038F14 gene [Source:MGI Symbol;Acc:MGI:2152337]	15	1916	0.530793	152	99	171	88	198	136
ENSMUSG00000085457	1110046J04Rik	RIKEN cDNA 1110046J04 gene [Source:MGI Symbol;Acc:MGI:1916058]	13	3487	0.454259	19	23	21	16	53	24
ENSMUSG00000040591	1110051M20Rik	RIKEN cDNA 1110051M20 gene [Source:MGI Symbol;Acc:MGI:1915079]	2	5202	0.517686	387	303	361	340	368	237
ENSMUSG00000068067	1110057P08Rik	RIKEN cDNA 1110057P08 gene [Source:MGI Symbol;Acc:MGI:1916094]	16	465	0.408602	0	0	0	0	0	0
ENSMUSG00000035171	1110059E24Rik	RIKEN cDNA 1110059E24 gene [Source:MGI Symbol;Acc:MGI:1913456]	19	3067	0.43267	49	25	83	47	70	24
ENSMUSG00000032551	1110059G10Rik	RIKEN cDNA 1110059G10 gene [Source:MGI Symbol;Acc:MGI:1913452]	9	5594	0.415445	25	53	27	36	43	26
ENSMUSG00000105036	1110060G06Rik	RIKEN cDNA 1110060G06 gene [Source:MGI Symbol;Acc:MGI:1916064]	5	499	0.380762	5	1	0	5	3	0
ENSMUSG00000078570	1110065P20Rik	RIKEN cDNA 1110065P20 gene [Source:MGI Symbol;Acc:MGI:1916170]	4	2069	0.611406	69	56	76	43	54	63
ENSMUSG00000111857	1190001M18Rik	RIKEN cDNA 1190001M18 gene [Source:MGI Symbol;Acc:MGI:1916174]	11	1270	0.444094	1	0	0	0	0	0
ENSMUSG00000043687	1190005I06Rik	RIKEN cDNA 1190005I06 gene [Source:MGI Symbol;Acc:MGI:1916168]	8	1083	0.648199	1	3	3	2	4	2
ENSMUSG00000063320	1190007I07Rik	RIKEN cDNA 1190007I07 gene [Source:MGI Symbol;Acc:MGI:3698433]	10	1197	0.519632	21	14	17	24	47	2
ENSMUSG00000110013	1190028D05Rik	RIKEN cDNA 1190028D05 gene [Source:MGI Symbol;Acc:MGI:3036227]	8	763	0.40367	0	0	0	0	0	0
ENSMUSG00000087684	1200007C13Rik	RIKEN cDNA 1200007C13 gene [Source:MGI Symbol;Acc:MGI:1921369]	2	2455	0.562118	81	43	49	189	144	79
ENSMUSG00000097290	1300002E11Rik	RIKEN cDNA 1300002E11 gene [Source:MGI Symbol;Acc:MGI:1919001]	16	4213	0.43342	136	123	191	96	144	62
ENSMUSG00000112545	1300014J16Rik	RIKEN cDNA 1300014J16 gene [Source:MGI Symbol;Acc:MGI:1921410]	12	1337	0.513089	12	2	4	6	0	0
ENSMUSG00000033688	1300017J02Rik	RIKEN cDNA 1300017J02 gene [Source:MGI Symbol;Acc:MGI:1919025]	9	4508	0.502884	15	11	2	11	26	24
ENSMUSG00000096221	1500002C15Rik	RIKEN cDNA 1500002C15 gene [Source:MGI Symbol;Acc:MGI:1916196]	4	2183	0.51443	8	9	8	17	12	14
ENSMUSG00000097595	1500002F19Rik	RIKEN cDNA 1500002F19 gene [Source:MGI Symbol;Acc:MGI:1923933]	7	1239	0.51816	3	6	20	2	3	0
ENSMUSG00000098912	1500004A13Rik	RIKEN cDNA 1500004A13 gene [Source:MGI Symbol;Acc:MGI:2442808]	3	13854	0.476036	74	62	98	70	101	67
ENSMUSG00000104888	1500005C15Rik	RIKEN cDNA 1500005C15 gene [Source:MGI Symbol;Acc:MGI:1919269]	3	2394	0.458647	1	9	13	5	2	1
ENSMUSG00000068099	1500009C09Rik	RIKEN cDNA 1500009C09 gene [Source:MGI Symbol;Acc:MGI:1923755]	15	1904	0.550945	40	12	32	15	28	7
ENSMUSG00000087651	1500009L16Rik	RIKEN cDNA 1500009L16 gene [Source:MGI Symbol;Acc:MGI:1917034]	10	3465	0.464646	17	16	48	5	13	16
ENSMUSG00000072694	1500011B03Rik	RIKEN cDNA 1500011B03 gene [Source:MGI Symbol;Acc:MGI:1913486]	5	2693	0.502785	231	214	222	142	277	149
ENSMUSG00000097247	1500012K07Rik	RIKEN cDNA 1500012K07 gene [Source:MGI Symbol;Acc:MGI:1916204]	7	2630	0.437643	3	7	9	4	0	2
ENSMUSG00000098702	1500015A07Rik	RIKEN cDNA 1500015A07 gene [Source:MGI Symbol;Acc:MGI:1916232]	18	2296	0.47169	74	44	25	35	53	46
ENSMUSG00000094732	1500015L24Rik	RIKEN cDNA 1500015L24 gene [Source:MGI Symbol;Acc:MGI:1916244]	19	2743	0.423259	4	10	1	7	6	19
ENSMUSG00000097383	1500026H17Rik	RIKEN cDNA 1500026H17 gene [Source:MGI Symbol;Acc:MGI:1916252]	10	3027	0.428807	9	7	5	14	4	5
ENSMUSG00000117718	1500032F14Rik	RIKEN cDNA 1500032F14 gene [Source:MGI Symbol;Acc:MGI:1925555]	19	460	0.541304	0	0	0	2	0	1
ENSMUSG00000059631	1500035N22Rik	RIKEN cDNA 1500035N22 gene [Source:MGI Symbol;Acc:MGI:1917508]	5	865	0.477457	0	1	3	0	4	0
ENSMUSG00000043747	1520401A03Rik	RIKEN cDNA 1520401A03 gene [Source:MGI Symbol;Acc:MGI:2443785]	17	4111	0.542934	14	2	19	0	10	1
ENSMUSG00000117232	1600002D24Rik	RIKEN cDNA 1600002D24 gene [Source:MGI Symbol;Acc:MGI:1917026]	16	2822	0.506733	0	0	0	2	0	0
ENSMUSG00000101585	1600010M07Rik	RIKEN cDNA 1600010M07 gene [Source:MGI Symbol;Acc:MGI:1917031]	7	1729	0.463274	0	8	0	0	0	0
ENSMUSG00000050088	1600012H06Rik	RIKEN cDNA 1600012H06 gene [Source:MGI Symbol;Acc:MGI:1915162]	17	3294	0.440498	111	122	121	79	262	139
ENSMUSG00000047661	1600012P17Rik	RIKEN cDNA 1600012P17 gene [Source:MGI Symbol;Acc:MGI:1919275]	1	2592	0.430556	0	0	0	0	0	0
ENSMUSG00000054676	1600014C10Rik	RIKEN cDNA 1600014C10 gene [Source:MGI Symbol;Acc:MGI:1919494]	7	3948	0.509878	28	17	44	32	24	16
ENSMUSG00000094690	1600014C23Rik	RIKEN cDNA 1600014C23 gene [Source:MGI Symbol;Acc:MGI:1919490]	17	518	0.523166	26	11	27	16	27	0
ENSMUSG00000102505	1600017P15Rik	RIKEN cDNA 1600017P15 gene [Source:MGI Symbol;Acc:MGI:1920499]	3	890	0.568539	3	0	8	0	0	0
ENSMUSG00000099429	1600019K03Rik	RIKEN cDNA 1600019K03 gene [Source:MGI Symbol;Acc:MGI:1917018]	16	477	0.469602	0	0	0	0	0	0
ENSMUSG00000097048	1600020E01Rik	RIKEN cDNA 1600020E01 gene [Source:MGI Symbol;Acc:MGI:1919262]	6	4328	0.503466	247	259	404	84	258	143
ENSMUSG00000117315	1600022D10Rik	RIKEN cDNA 1600022D10 gene [Source:MGI Symbol;Acc:MGI:1920502]	17	1562	0.419974	0	1	0	0	0	0
ENSMUSG00000104986	1600023N17Rik	RIKEN cDNA 1600023N17 gene [Source:MGI Symbol;Acc:MGI:1917038]	5	1007	0.496524	0	2	1	0	1	0
ENSMUSG00000085114	1600025M17Rik	RIKEN cDNA 1600025M17 gene [Source:MGI Symbol;Acc:MGI:1919280]	X	1071	0.438842	0	0	0	0	0	0
ENSMUSG00000110340	1600027J07Rik	RIKEN cDNA 1600027J07 gene [Source:MGI Symbol;Acc:MGI:1917044]	8	489	0.453988	0	0	0	3	4	5
ENSMUSG00000057818	1600029O15Rik	RIKEN cDNA 1600029O15 gene [Source:MGI Symbol;Acc:MGI:3045362]	9	1809	0.464898	3	0	0	0	0	0
ENSMUSG00000047150	1700001C19Rik	RIKEN cDNA 1700001C19 gene [Source:MGI Symbol;Acc:MGI:1922712]	17	1896	0.518987	0	0	0	0	0	0
ENSMUSG00000099419	1700001D01Rik	RIKEN cDNA 1700001D01 gene [Source:MGI Symbol;Acc:MGI:1916529]	8	565	0.472566	0	0	1	4	5	0
ENSMUSG00000095384	1700001F09Rik	RIKEN cDNA 1700001F09 gene [Source:MGI Symbol;Acc:MGI:1919076]	14	884	0.397059	0	1	0	0	0	0
ENSMUSG00000087170	1700001G01Rik	RIKEN cDNA 1700001G01 gene [Source:MGI Symbol;Acc:MGI:1922683]	18	2249	0.425078	0	0	0	0	0	0
ENSMUSG00000085984	1700001G11Rik	RIKEN cDNA 1700001G11 gene [Source:MGI Symbol;Acc:MGI:1916553]	14	1080	0.533333	0	1	2	3	0	13
ENSMUSG00000103746	1700001G17Rik	RIKEN cDNA 1700001G17 gene [Source:MGI Symbol;Acc:MGI:1914753]	1	889	0.575928	2	7	1	0	0	0
ENSMUSG00000095040	1700001J03Rik	RIKEN cDNA 1700001J03 gene [Source:MGI Symbol;Acc:MGI:1916532]	5	868	0.493088	8	1	4	3	9	1
ENSMUSG00000086135	1700001J04Rik	RIKEN cDNA 1700001J04 gene [Source:MGI Symbol;Acc:MGI:1919075]	11	929	0.533907	0	0	0	0	0	0
ENSMUSG00000101963	1700001J11Rik	RIKEN cDNA 1700001J11 gene [Source:MGI Symbol;Acc:MGI:1919474]	9	2664	0.464715	4	0	0	0	0	0
ENSMUSG00000056508	1700001K19Rik	RIKEN cDNA 1700001K19 gene [Source:MGI Symbol;Acc:MGI:1913573]	12	955	0.566492	1	2	17	0	0	31
ENSMUSG00000118314	1700001K23Rik	RIKEN cDNA 1700001K23 gene [Source:MGI Symbol;Acc:MGI:1916569]	19	1535	0.490554	0	0	1	0	0	0
ENSMUSG00000075511	1700001L05Rik	RIKEN cDNA 1700001L05 gene [Source:MGI Symbol;Acc:MGI:1916541]	15	6112	0.466787	30	66	31	22	31	30
ENSMUSG00000021534	1700001L19Rik	RIKEN cDNA 1700001L19 gene [Source:MGI Symbol;Acc:MGI:1916565]	13	1826	0.464951	0	2	0	0	0	0
ENSMUSG00000106210	1700001N15Rik	RIKEN cDNA 1700001N15 gene [Source:MGI Symbol;Acc:MGI:1923629]	3	482	0.408714	0	0	0	0	0	0
ENSMUSG00000044320	1700001O22Rik	RIKEN cDNA 1700001O22 gene [Source:MGI Symbol;Acc:MGI:1923631]	2	2788	0.592181	23	16	8	8	11	7
ENSMUSG00000018543	1700001P01Rik	RIKEN cDNA 1700001P01 gene [Source:MGI Symbol;Acc:MGI:1919465]	11	624	0.508013	0	3	2	2	0	0
ENSMUSG00000099391	1700003C15Rik	RIKEN cDNA 1700003C15 gene [Source:MGI Symbol;Acc:MGI:1916595]	5	1871	0.407803	0	0	0	0	0	0
ENSMUSG00000085944	1700003D09Rik	RIKEN cDNA 1700003D09 gene [Source:MGI Symbol;Acc:MGI:1916588]	11	1389	0.536357	1	0	0	1	0	0
ENSMUSG00000030030	1700003E16Rik	RIKEN cDNA 1700003E16 gene [Source:MGI Symbol;Acc:MGI:1919087]	6	2221	0.606033	18	20	56	11	21	28
ENSMUSG00000095110	1700003E24Rik	RIKEN cDNA 1700003E24 gene [Source:MGI Symbol;Acc:MGI:1916607]	X	577	0.450607	0	0	0	0	0	0
ENSMUSG00000038523	1700003F12Rik	RIKEN cDNA 1700003F12 gene [Source:MGI Symbol;Acc:MGI:1922730]	2	976	0.643443	1	4	2	9	4	0
ENSMUSG00000087621	1700003G18Rik	RIKEN cDNA 1700003G18 gene [Source:MGI Symbol;Acc:MGI:1916600]	7	1799	0.411895	10	1	2	7	1	1
ENSMUSG00000039174	1700003H04Rik	RIKEN cDNA 1700003H04 gene [Source:MGI Symbol;Acc:MGI:1923637]	3	1591	0.412319	0	0	0	0	0	0
ENSMUSG00000107526	1700003I16Rik	RIKEN cDNA 1700003I16 gene [Source:MGI Symbol;Acc:MGI:1923949]	6	1058	0.454631	0	0	0	0	0	0
ENSMUSG00000100372	1700003I22Rik	RIKEN cDNA 1700003I22 gene [Source:MGI Symbol;Acc:MGI:1916606]	1	482	0.470954	0	0	0	0	0	0
ENSMUSG00000101565	1700003L19Rik	RIKEN cDNA 1700003L19 gene [Source:MGI Symbol;Acc:MGI:1922743]	16	1269	0.437352	0	0	0	0	0	0
ENSMUSG00000085389	1700003M07Rik	RIKEN cDNA 1700003M07 gene [Source:MGI Symbol;Acc:MGI:1919475]	4	873	0.533792	4	7	6	2	4	3
ENSMUSG00000102463	1700003N22Rik	RIKEN cDNA 1700003N22 gene [Source:MGI Symbol;Acc:MGI:1919464]	3	808	0.601485	0	0	0	0	0	0
ENSMUSG00000118311	1700003O11Rik	RIKEN cDNA 1700003O11 gene [Source:MGI Symbol;Acc:MGI:1922882]	18	582	0.503436	0	0	0	0	0	0
ENSMUSG00000100727	1700003P14Rik	RIKEN cDNA 1700003P14 gene [Source:MGI Symbol;Acc:MGI:1916594]	13	1146	0.391798	0	1	1	0	0	0
ENSMUSG00000027973	1700006A11Rik	RIKEN cDNA 1700006A11 gene [Source:MGI Symbol;Acc:MGI:1919074]	3	2161	0.412309	0	0	0	0	0	0
ENSMUSG00000100274	1700006F04Rik	RIKEN cDNA 1700006F04 gene [Source:MGI Symbol;Acc:MGI:1922682]	14	441	0.433107	5	0	1	0	0	0
ENSMUSG00000102000	1700006H21Rik	RIKEN cDNA 1700006H21 gene [Source:MGI Symbol;Acc:MGI:1919507]	13	627	0.508772	0	0	0	0	0	0
ENSMUSG00000034764	1700006J14Rik	RIKEN cDNA 1700006J14 gene [Source:MGI Symbol;Acc:MGI:2447818]	10	2885	0.464471	7	0	0	0	1	0
ENSMUSG00000102738	1700006P03Rik	RIKEN cDNA 1700006P03 gene [Source:MGI Symbol;Acc:MGI:1925628]	1	409	0.435208	0	0	0	0	0	0
ENSMUSG00000101234	1700007E05Rik	RIKEN cDNA 1700007E05 gene [Source:MGI Symbol;Acc:MGI:2149745]	16	2628	0.436073	0	0	1	0	0	0
ENSMUSG00000100666	1700007F19Rik	RIKEN cDNA 1700007F19 gene [Source:MGI Symbol;Acc:MGI:1915100]	3	1642	0.4257	0	0	0	3	0	0
ENSMUSG00000116556	1700007H22Rik	RIKEN cDNA 1700007H22 gene [Source:MGI Symbol;Acc:MGI:1922734]	16	537	0.43203	0	0	0	0	0	0
ENSMUSG00000086330	1700007J10Rik	RIKEN cDNA 1700007J10 gene [Source:MGI Symbol;Acc:MGI:1916570]	11	1298	0.493837	8	3	1	3	13	2
ENSMUSG00000026831	1700007K13Rik	RIKEN cDNA 1700007K13 gene [Source:MGI Symbol;Acc:MGI:1916577]	2	965	0.525389	7	0	0	0	0	0
ENSMUSG00000097318	1700007L15Rik	RIKEN cDNA 1700007L15 gene [Source:MGI Symbol;Acc:MGI:1916581]	16	738	0.520325	15	6	17	3	13	12
ENSMUSG00000086613	1700007M16Rik	RIKEN cDNA 1700007M16 gene [Source:MGI Symbol;Acc:MGI:1919487]	2	435	0.448276	0	0	0	0	0	0
ENSMUSG00000089730	1700007P06Rik	RIKEN cDNA 1700007P06 gene [Source:MGI Symbol;Acc:MGI:1916558]	1	823	0.504253	0	0	0	0	0	4
ENSMUSG00000103452	1700008A23Rik	RIKEN cDNA 1700008A23 gene [Source:MGI Symbol;Acc:MGI:1922713]	9	691	0.510854	0	3	0	0	4	0
ENSMUSG00000104872	1700008B11Rik	RIKEN cDNA 1700008B11 gene [Source:MGI Symbol;Acc:MGI:1913571]	5	634	0.55205	16	2	5	5	1	7
ENSMUSG00000111986	1700008C04Rik	RIKEN cDNA 1700008C04 gene [Source:MGI Symbol;Acc:MGI:1922744]	12	797	0.461731	0	0	0	0	0	0
ENSMUSG00000106860	1700008H02Rik	RIKEN cDNA 1700008H02 gene [Source:MGI Symbol;Acc:MGI:1913575]	5	1684	0.388361	0	0	0	0	0	0
ENSMUSG00000101225	1700008J07Rik	RIKEN cDNA 1700008J07 gene [Source:MGI Symbol;Acc:MGI:1916610]	7	2432	0.512336	59	43	54	56	40	43
ENSMUSG00000101012	1700008K24Rik	RIKEN cDNA 1700008K24 gene [Source:MGI Symbol;Acc:MGI:1916561]	17	950	0.504211	0	0	0	0	0	0
ENSMUSG00000109657	1700008N11Rik	RIKEN cDNA 1700008N11 gene [Source:MGI Symbol;Acc:MGI:1922692]	8	636	0.424528	0	0	0	0	0	0
ENSMUSG00000008028	1700008O03Rik	RIKEN cDNA 1700008O03 gene [Source:MGI Symbol;Acc:MGI:1916599]	7	3675	0.518367	2	6	3	0	4	1
ENSMUSG00000069118	1700008P02Rik	RIKEN cDNA 1700008P02 gene [Source:MGI Symbol;Acc:MGI:1916597]	3	783	0.440613	0	0	0	0	0	0
ENSMUSG00000101404	1700009C05Rik	RIKEN cDNA 1700009C05 gene [Source:MGI Symbol;Acc:MGI:1921470]	6	788	0.442893	0	0	0	0	0	0
ENSMUSG00000096573	1700009J07Rik	RIKEN cDNA 1700009J07 gene [Source:MGI Symbol;Acc:MGI:1914938]	10	1368	0.51462	0	0	0	0	0	0
ENSMUSG00000028287	1700009N14Rik	RIKEN cDNA 1700009N14 gene [Source:MGI Symbol;Acc:MGI:1922721]	4	1258	0.5	0	1	0	0	0	0
ENSMUSG00000057047	1700010B08Rik	RIKEN cDNA 1700010B08 gene [Source:MGI Symbol;Acc:MGI:1922735]	2	899	0.509455	0	0	2	0	0	0
ENSMUSG00000099958	1700010B13Rik	RIKEN cDNA 1700010B13 gene [Source:MGI Symbol;Acc:MGI:1922741]	15	2102	0.499524	0	1	0	0	0	0
ENSMUSG00000071721	1700010D01Rik	RIKEN cDNA 1700010D01 gene [Source:MGI Symbol;Acc:MGI:1923636]	X	507	0.451677	0	0	0	0	0	0
ENSMUSG00000115752	1700010G06Rik	RIKEN cDNA 1700010G06 gene [Source:MGI Symbol;Acc:MGI:1921467]	15	683	0.484627	1	2	6	1	0	2
ENSMUSG00000067101	1700010H22Rik	RIKEN cDNA 1700010H22 gene [Source:MGI Symbol;Acc:MGI:1922750]	5	1355	0.41107	0	0	0	0	0	2
ENSMUSG00000100010	1700010I02Rik	RIKEN cDNA 1700010I02 gene [Source:MGI Symbol;Acc:MGI:1922726]	3	577	0.400347	0	0	0	0	0	0
ENSMUSG00000023873	1700010I14Rik	RIKEN cDNA 1700010I14 gene [Source:MGI Symbol;Acc:MGI:1914181]	17	2292	0.484729	1	6	1	1	11	0
ENSMUSG00000100314	1700010J16Rik	RIKEN cDNA 1700010J16 gene [Source:MGI Symbol;Acc:MGI:1916605]	10	928	0.414871	0	0	0	0	0	0
ENSMUSG00000092599	1700010K23Rik	RIKEN cDNA 1700010K23 gene [Source:MGI Symbol;Acc:MGI:1922751]	16	376	0.396277	3	0	0	0	0	0
ENSMUSG00000085102	1700010K24Rik	RIKEN cDNA 1700010K24 gene [Source:MGI Symbol;Acc:MGI:1922690]	3	226	0.473451	0	0	0	2	0	10
ENSMUSG00000030636	1700010L04Rik	RIKEN cDNA 1700010L04 gene [Source:MGI Symbol;Acc:MGI:1916583]	7	1577	0.447685	0	3	0	0	0	0
ENSMUSG00000101855	1700010N08Rik	RIKEN cDNA 1700010N08 gene [Source:MGI Symbol;Acc:MGI:1916590]	7	1414	0.448373	0	0	0	0	0	0
ENSMUSG00000102099	1700011B04Rik	RIKEN cDNA 1700011B04 gene [Source:MGI Symbol;Acc:MGI:1922894]	13	4166	0.417907	0	0	1	0	0	4
ENSMUSG00000108800	1700011C11Rik	RIKEN cDNA 1700011C11 gene [Source:MGI Symbol;Acc:MGI:1922701]	7	365	0.449315	0	0	0	0	0	0
ENSMUSG00000108791	1700011D18Rik	RIKEN cDNA 1700011D18 gene [Source:MGI Symbol;Acc:MGI:1922714]	7	277	0.509025	0	0	0	0	0	0
ENSMUSG00000109759	1700011L03Rik	RIKEN cDNA 1700011L03 gene [Source:MGI Symbol;Acc:MGI:1916535]	8	608	0.529605	0	0	0	0	0	0
ENSMUSG00000031682	1700011L22Rik	RIKEN cDNA 1700011L22 gene [Source:MGI Symbol;Acc:MGI:1914937]	8	1026	0.515595	3	1	7	0	2	5
ENSMUSG00000079476	1700011M02Rik	RIKEN cDNA 1700011M02 gene [Source:MGI Symbol;Acc:MGI:1922693]	X	420	0.533333	0	0	0	0	0	0
ENSMUSG00000029766	1700012A03Rik	RIKEN cDNA 1700012A03 gene [Source:MGI Symbol;Acc:MGI:1923632]	6	1008	0.509921	0	0	0	0	0	0
ENSMUSG00000020617	1700012B07Rik	RIKEN cDNA 1700012B07 gene [Source:MGI Symbol;Acc:MGI:1916574]	11	2177	0.502526	0	0	0	0	0	0
ENSMUSG00000031927	1700012B09Rik	RIKEN cDNA 1700012B09 gene [Source:MGI Symbol;Acc:MGI:1916575]	9	819	0.484737	0	1	0	3	0	3
ENSMUSG00000086482	1700012C08Rik	RIKEN cDNA 1700012C08 gene [Source:MGI Symbol;Acc:MGI:1923635]	4	363	0.495868	0	0	0	0	0	0
ENSMUSG00000085470	1700012C14Rik	RIKEN cDNA 1700012C14 gene [Source:MGI Symbol;Acc:MGI:1916587]	6	622	0.501608	0	0	0	0	0	0
ENSMUSG00000110424	1700012D14Rik	RIKEN cDNA 1700012D14 gene [Source:MGI Symbol;Acc:MGI:1922729]	7	4153	0.431977	50	37	77	21	33	13
ENSMUSG00000105023	1700012D16Rik	RIKEN cDNA 1700012D16 gene [Source:MGI Symbol;Acc:MGI:1922739]	3	577	0.490468	1	0	0	2	0	0
ENSMUSG00000101275	1700012E03Rik	RIKEN cDNA 1700012E03 gene [Source:MGI Symbol;Acc:MGI:1923817]	1	1377	0.49528	1	0	0	0	12	0
ENSMUSG00000102069	1700012I11Rik	RIKEN cDNA 1700012I11 gene [Source:MGI Symbol;Acc:MGI:1916584]	15	1039	0.460058	0	0	0	0	0	0
ENSMUSG00000107394	1700012J15Rik	RIKEN cDNA 1700012J15 gene [Source:MGI Symbol;Acc:MGI:1922737]	6	471	0.503185	0	0	0	0	0	0
ENSMUSG00000103545	1700012J22Rik	RIKEN cDNA 1700012J22 gene [Source:MGI Symbol;Acc:MGI:1922746]	13	830	0.480723	0	0	0	0	0	0
ENSMUSG00000028589	1700012P22Rik	RIKEN cDNA 1700012P22 gene [Source:MGI Symbol;Acc:MGI:1916614]	4	974	0.4846	0	0	0	0	0	0
ENSMUSG00000106899	1700013A02Rik	RIKEN cDNA 1700013A02 gene [Source:MGI Symbol;Acc:MGI:1916616]	5	645	0.429457	0	0	0	0	0	0
ENSMUSG00000079346	1700013D24Rik	RIKEN cDNA 1700013D24 gene [Source:MGI Symbol;Acc:MGI:1924171]	6	513	0.465887	0	0	0	0	0	0
ENSMUSG00000027886	1700013F07Rik	RIKEN cDNA 1700013F07 gene [Source:MGI Symbol;Acc:MGI:1922754]	3	1452	0.473829	0	4	10	0	0	1
ENSMUSG00000041399	1700013G24Rik	RIKEN cDNA 1700013G24 gene [Source:MGI Symbol;Acc:MGI:1916630]	4	1048	0.563931	0	0	0	0	0	0
ENSMUSG00000054727	1700013H16Rik	RIKEN cDNA 1700013H16 gene [Source:MGI Symbol;Acc:MGI:1922764]	X	1224	0.420752	0	0	0	0	0	0
ENSMUSG00000106586	1700013M08Rik	RIKEN cDNA 1700013M08 gene [Source:MGI Symbol;Acc:MGI:1922755]	5	1481	0.456448	0	0	0	0	0	0
ENSMUSG00000085801	1700013N06Rik	RIKEN cDNA 1700013N06 gene [Source:MGI Symbol;Acc:MGI:1922884]	12	663	0.46908	0	0	0	0	0	0
ENSMUSG00000118578	1700014B07Rik	RIKEN cDNA 1700014B07 gene [Source:MGI Symbol;Acc:MGI:1919498]	2	818	0.718826	5	0	0	1	0	0
ENSMUSG00000051054	1700014D04Rik	RIKEN cDNA 1700014D04 gene [Source:MGI Symbol;Acc:MGI:1921474]	13	3281	0.497409	3	2	2	2	5	1
ENSMUSG00000105903	1700014F14Rik	RIKEN cDNA 1700014F14 gene [Source:MGI Symbol;Acc:MGI:1924172]	5	197	0.426396	0	0	0	0	0	0
ENSMUSG00000110056	1700014L14Rik	RIKEN cDNA 1700014L14 gene [Source:MGI Symbol;Acc:MGI:1924173]	8	481	0.376299	0	0	0	0	0	0
ENSMUSG00000113696	1700015C15Rik	RIKEN cDNA 1700015C15 gene [Source:MGI Symbol;Acc:MGI:1922782]	13	374	0.44385	4	0	0	0	0	0
ENSMUSG00000104908	1700015C17Rik	RIKEN cDNA 1700015C17 gene [Source:MGI Symbol;Acc:MGI:1924178]	3	239	0.485356	2	0	0	0	0	1
ENSMUSG00000094445	1700015G11Rik	RIKEN cDNA 1700015G11 gene [Source:MGI Symbol;Acc:MGI:1922779]	7	397	0.463476	0	0	0	0	0	0
ENSMUSG00000115761	1700015H07Rik	RIKEN cDNA 1700015H07 gene [Source:MGI Symbol;Acc:MGI:1922777]	15	560	0.398214	0	0	0	0	0	0
ENSMUSG00000110335	1700015I17Rik	RIKEN cDNA 1700015I17 gene [Source:MGI Symbol;Acc:MGI:1922784]	8	2099	0.474988	0	0	0	0	0	0
ENSMUSG00000097671	1700015O11Rik	RIKEN cDNA 1700015O11 gene [Source:MGI Symbol;Acc:MGI:1919105]	6	678	0.510324	0	0	0	0	0	0
ENSMUSG00000102737	1700016A09Rik	RIKEN cDNA 1700016A09 gene [Source:MGI Symbol;Acc:MGI:1921477]	8	835	0.677844	5	7	22	15	19	9
ENSMUSG00000104538	1700016B01Rik	RIKEN cDNA 1700016B01 gene [Source:MGI Symbol;Acc:MGI:1922890]	5	270	0.555556	0	0	0	0	0	0
ENSMUSG00000108979	1700016B15Rik	RIKEN cDNA 1700016B15 gene [Source:MGI Symbol;Acc:MGI:1916677]	7	733	0.555252	1	0	1	0	0	0
ENSMUSG00000015962	1700016C15Rik	RIKEN cDNA 1700016C15 gene [Source:MGI Symbol;Acc:MGI:1916678]	1	768	0.458333	0	0	1	0	0	0
ENSMUSG00000031509	1700016D06Rik	RIKEN cDNA 1700016D06 gene [Source:MGI Symbol;Acc:MGI:1923663]	8	1612	0.453474	0	0	0	0	0	0
ENSMUSG00000103481	1700016D08Rik	RIKEN cDNA 1700016D08 gene [Source:MGI Symbol;Acc:MGI:1925627]	16	368	0.595109	1	0	2	0	1	0
ENSMUSG00000104955	1700016F12Rik	RIKEN cDNA 1700016F12 gene [Source:MGI Symbol;Acc:MGI:1916674]	5	655	0.433588	0	0	0	0	0	0
ENSMUSG00000100625	1700016G22Rik	RIKEN cDNA 1700016G22 gene [Source:MGI Symbol;Acc:MGI:1919117]	13	740	0.462162	0	0	0	0	3	0
ENSMUSG00000114673	1700016H03Rik	RIKEN cDNA 1700016H03 gene [Source:MGI Symbol;Acc:MGI:1922903]	19	437	0.508009	0	0	0	0	0	0
ENSMUSG00000029320	1700016H13Rik	RIKEN cDNA 1700016H13 gene [Source:MGI Symbol;Acc:MGI:1921468]	5	1751	0.49743	0	0	3	0	0	0
ENSMUSG00000111103	1700016J18Rik	RIKEN cDNA 1700016J18 gene [Source:MGI Symbol;Acc:MGI:1922811]	10	249	0.481928	4	1	1	0	0	0
ENSMUSG00000114563	1700016K05Rik	RIKEN cDNA 1700016K05 gene [Source:MGI Symbol;Acc:MGI:1922794]	17	386	0.42487	0	0	0	0	0	0
ENSMUSG00000053783	1700016K19Rik	RIKEN cDNA 1700016K19 gene [Source:MGI Symbol;Acc:MGI:1921480]	11	921	0.571118	0	0	0	0	0	0
ENSMUSG00000101483	1700016L21Rik	RIKEN cDNA 1700016L21 gene [Source:MGI Symbol;Acc:MGI:1919458]	1	968	0.427686	1	3	0	0	0	0
ENSMUSG00000085609	1700016P03Rik	RIKEN cDNA 1700016P03 gene [Source:MGI Symbol;Acc:MGI:1922792]	11	863	0.464658	21	14	49	7	29	12
ENSMUSG00000101894	1700016P04Rik	RIKEN cDNA 1700016P04 gene [Source:MGI Symbol;Acc:MGI:1916663]	6	429	0.41958	0	0	0	0	0	0
ENSMUSG00000032300	1700017B05Rik	RIKEN cDNA 1700017B05 gene [Source:MGI Symbol;Acc:MGI:1921461]	9	5235	0.572875	109	215	116	174	408	232
ENSMUSG00000037884	1700017G19Rik	RIKEN cDNA 1700017G19 gene [Source:MGI Symbol;Acc:MGI:1919477]	3	2904	0.455923	0	0	0	0	0	0
ENSMUSG00000098727	1700017I07Rik	RIKEN cDNA 1700017I07 gene [Source:MGI Symbol;Acc:MGI:1922756]	9	462	0.495671	0	0	0	1	0	0
ENSMUSG00000086348	1700017J07Rik	RIKEN cDNA 1700017J07 gene [Source:MGI Symbol;Acc:MGI:1922758]	2	473	0.501057	0	0	0	0	0	0
ENSMUSG00000107232	1700017L05Rik	RIKEN cDNA 1700017L05 gene [Source:MGI Symbol;Acc:MGI:1916620]	5	558	0.523297	0	0	0	0	0	0
ENSMUSG00000105651	1700017M07Rik	RIKEN cDNA 1700017M07 gene [Source:MGI Symbol;Acc:MGI:1923648]	3	940	0.489362	0	0	0	0	4	0
ENSMUSG00000056912	1700017N19Rik	RIKEN cDNA 1700017N19 gene [Source:MGI Symbol;Acc:MGI:1913855]	10	2353	0.399915	0	0	0	0	0	0
ENSMUSG00000038408	1700018A04Rik	RIKEN cDNA 1700018A04 gene [Source:MGI Symbol;Acc:MGI:1916631]	13	4216	0.533207	0	0	0	0	0	0
ENSMUSG00000103616	1700018A14Rik	RIKEN cDNA 1700018A14 gene [Source:MGI Symbol;Acc:MGI:1916641]	18	711	0.601969	1	0	7	0	2	8
ENSMUSG00000107368	1700018A23Rik	RIKEN cDNA 1700018A23 gene [Source:MGI Symbol;Acc:MGI:1919481]	6	398	0.525126	1	0	0	1	0	0
ENSMUSG00000031809	1700018B08Rik	RIKEN cDNA 1700018B08 gene [Source:MGI Symbol;Acc:MGI:1923655]	8	1294	0.572643	0	3	0	0	0	0
ENSMUSG00000037910	1700018B24Rik	RIKEN cDNA 1700018B24 gene [Source:MGI Symbol;Acc:MGI:1913582]	3	593	0.487352	0	0	0	0	0	0
ENSMUSG00000029620	1700018F24Rik	RIKEN cDNA 1700018F24 gene [Source:MGI Symbol;Acc:MGI:1916646]	5	1122	0.475045	0	0	0	0	0	0
ENSMUSG00000109745	1700018G05Rik	RIKEN cDNA 1700018G05 gene [Source:MGI Symbol;Acc:MGI:1916638]	X	386	0.554404	0	0	0	0	0	0
ENSMUSG00000100075	1700018L02Rik	RIKEN cDNA 1700018L02 gene [Source:MGI Symbol;Acc:MGI:1914579]	19	2485	0.51992	26	23	4	16	42	5
ENSMUSG00000046145	1700018M17Rik	RIKEN cDNA 1700018M17 gene [Source:MGI Symbol;Acc:MGI:1919495]	4	456	0.756579	7	5	0	0	9	0
ENSMUSG00000110709	1700018P08Rik	RIKEN cDNA 1700018P08 gene [Source:MGI Symbol;Acc:MGI:1920580]	8	1239	0.447942	0	0	0	0	0	0
ENSMUSG00000060715	1700019A02Rik	RIKEN cDNA 1700019A02 gene [Source:MGI Symbol;Acc:MGI:1916647]	1	777	0.397683	7	2	6	2	3	0
ENSMUSG00000109102	1700019A23Rik	RIKEN cDNA 1700019A23 gene [Source:MGI Symbol;Acc:MGI:1915470]	7	196	0.545918	0	0	0	0	0	0
ENSMUSG00000113770	1700019C18Rik	RIKEN cDNA 1700019C18 gene [Source:MGI Symbol;Acc:MGI:1922793]	13	2633	0.472465	0	0	0	0	0	4
ENSMUSG00000043629	1700019D03Rik	RIKEN cDNA 1700019D03 gene [Source:MGI Symbol;Acc:MGI:1914330]	1	4330	0.425404	8	3	22	0	18	1
ENSMUSG00000086202	1700019E08Rik	RIKEN cDNA 1700019E08 gene [Source:MGI Symbol;Acc:MGI:1916655]	2	830	0.431325	0	0	0	0	0	0
ENSMUSG00000107027	1700019F05Rik	RIKEN cDNA 1700019F05 gene [Source:MGI Symbol;Acc:MGI:1916652]	5	533	0.467167	0	0	0	0	0	0
ENSMUSG00000085416	1700019G24Rik	RIKEN cDNA 1700019G24 gene [Source:MGI Symbol;Acc:MGI:1919499]	6	503	0.45328	0	0	0	0	0	0
ENSMUSG00000111489	1700019J19Rik	RIKEN cDNA 1700019J19 gene [Source:MGI Symbol;Acc:MGI:1923662]	9	5324	0.461119	1	0	0	0	0	0
ENSMUSG00000111639	1700019L13Rik	RIKEN cDNA 1700019L13 gene [Source:MGI Symbol;Acc:MGI:1919476]	9	4947	0.554073	14	18	11	7	16	14
ENSMUSG00000059695	1700019M22Rik	RIKEN cDNA 1700019M22 gene [Source:MGI Symbol;Acc:MGI:1916673]	12	354	0.446328	0	0	0	0	0	0
ENSMUSG00000026931	1700019N19Rik	RIKEN cDNA 1700019N19 gene [Source:MGI Symbol;Acc:MGI:1914757]	19	1257	0.5179	0	4	0	0	0	0
ENSMUSG00000099808	1700019P21Rik	RIKEN cDNA 1700019P21 gene [Source:MGI Symbol;Acc:MGI:1922796]	1	411	0.459854	0	0	0	0	0	0
ENSMUSG00000027409	1700020A23Rik	RIKEN cDNA 1700020A23 gene [Source:MGI Symbol;Acc:MGI:1922906]	2	739	0.568336	0	0	0	0	0	0
ENSMUSG00000113628	1700020D12Rik	RIKEN cDNA 1700020D12 gene [Source:MGI Symbol;Acc:MGI:1916687]	12	426	0.478873	0	0	0	0	0	0
ENSMUSG00000110052	1700020G03Rik	RIKEN cDNA 1700020G03 gene [Source:MGI Symbol;Acc:MGI:1921485]	8	889	0.618673	0	0	0	0	0	0
ENSMUSG00000101801	1700020G17Rik	RIKEN cDNA 1700020G17 gene [Source:MGI Symbol;Acc:MGI:1922880]	10	1476	0.466802	0	0	0	0	0	0
ENSMUSG00000013928	1700020L13Rik	RIKEN cDNA 1700020L13 gene [Source:MGI Symbol;Acc:MGI:1922879]	7	2432	0.538651	0	0	0	0	0	1
ENSMUSG00000035085	1700020L24Rik	RIKEN cDNA 1700020L24 gene [Source:MGI Symbol;Acc:MGI:1913580]	11	1050	0.6	0	0	2	0	0	0
ENSMUSG00000100146	1700020M21Rik	RIKEN cDNA 1700020M21 gene [Source:MGI Symbol;Acc:MGI:1923652]	9	644	0.462733	0	0	0	0	0	6
ENSMUSG00000050844	1700020N01Rik	RIKEN cDNA 1700020N01 gene [Source:MGI Symbol;Acc:MGI:1914942]	10	1136	0.46743	0	0	0	0	0	0
ENSMUSG00000059690	1700020N15Rik	RIKEN cDNA 1700020N15 gene [Source:MGI Symbol;Acc:MGI:1922759]	X	525	0.43619	0	0	0	0	0	0
ENSMUSG00000100253	1700020N18Rik	RIKEN cDNA 1700020N18 gene [Source:MGI Symbol;Acc:MGI:1914336]	1	547	0.557587	1	0	0	1	0	0
ENSMUSG00000037535	1700021A07Rik	RIKEN cDNA 1700021A07 gene [Source:MGI Symbol;Acc:MGI:1924174]	10	721	0.493759	0	0	0	6	0	0
ENSMUSG00000105426	1700021F02Rik	RIKEN cDNA 1700021F02 gene [Source:MGI Symbol;Acc:MGI:1922769]	5	350	0.477143	0	0	0	0	0	0
ENSMUSG00000027518	1700021F07Rik	RIKEN cDNA 1700021F07 gene [Source:MGI Symbol;Acc:MGI:1919471]	2	646	0.547988	0	0	0	0	0	0
ENSMUSG00000107053	1700021F13Rik	RIKEN cDNA 1700021F13 gene [Source:MGI Symbol;Acc:MGI:1924176]	5	549	0.468124	0	0	0	0	0	0
ENSMUSG00000112387	1700021G15Rik	RIKEN cDNA 1700021G15 gene [Source:MGI Symbol;Acc:MGI:1920506]	10	528	0.443182	0	0	0	0	0	0
ENSMUSG00000086890	1700021J08Rik	RIKEN cDNA 1700021J08 gene [Source:MGI Symbol;Acc:MGI:1919485]	4	575	0.575652	0	0	0	0	0	0
ENSMUSG00000086955	1700021L23Rik	RIKEN cDNA 1700021L23 gene [Source:MGI Symbol;Acc:MGI:1923660]	4	726	0.506887	0	0	0	0	0	0
ENSMUSG00000087343	1700021N21Rik	RIKEN cDNA 1700021N21 gene [Source:MGI Symbol;Acc:MGI:1916659]	4	904	0.522124	0	0	0	4	0	0
ENSMUSG00000096796	1700021P04Rik	RIKEN cDNA 1700021P04 gene [Source:MGI Symbol;Acc:MGI:1922771]	19	659	0.497724	0	0	0	0	0	0
ENSMUSG00000038165	1700022A21Rik	RIKEN cDNA 1700022A21 gene [Source:MGI Symbol;Acc:MGI:1919502]	5	1448	0.535221	0	0	0	0	0	0
ENSMUSG00000099751	1700022A22Rik	RIKEN cDNA 1700022A22 gene [Source:MGI Symbol;Acc:MGI:1922807]	15	1507	0.436629	0	0	0	0	0	0
ENSMUSG00000099983	1700022E09Rik	RIKEN cDNA 1700022E09 gene [Source:MGI Symbol;Acc:MGI:1922886]	16	666	0.403904	2	0	0	0	2	0
ENSMUSG00000112581	1700022H01Rik	RIKEN cDNA 1700022H01 gene [Source:MGI Symbol;Acc:MGI:1922789]	10	387	0.542636	0	0	0	0	1	8
ENSMUSG00000099360	1700022H16Rik	RIKEN cDNA 1700022H16 gene [Source:MGI Symbol;Acc:MGI:1916670]	12	476	0.468487	0	0	0	0	0	0
ENSMUSG00000028451	1700022I11Rik	RIKEN cDNA 1700022I11 gene [Source:MGI Symbol;Acc:MGI:1914567]	4	4542	0.484808	3	5	0	0	7	4
ENSMUSG00000097523	1700022N22Rik	RIKEN cDNA 1700022N22 gene [Source:MGI Symbol;Acc:MGI:1916681]	17	1632	0.536152	0	5	5	2	6	9
ENSMUSG00000117050	1700023B13Rik	RIKEN cDNA 1700023B13 gene [Source:MGI Symbol;Acc:MGI:1920529]	17	1046	0.594646	5	3	5	3	2	2
ENSMUSG00000087393	1700023C21Rik	RIKEN cDNA 1700023C21 gene [Source:MGI Symbol;Acc:MGI:1920507]	11	389	0.44473	0	0	0	0	0	0
ENSMUSG00000100000	1700023F02Rik	RIKEN cDNA 1700023F02 gene [Source:MGI Symbol;Acc:MGI:1916683]	10	767	0.440678	4	6	0	0	3	0
ENSMUSG00000103503	1700023G09Rik	RIKEN cDNA 1700023G09 gene [Source:MGI Symbol;Acc:MGI:1920531]	1	1460	0.410959	0	0	0	0	0	0
ENSMUSG00000089827	1700023H06Rik	RIKEN cDNA 1700023H06 gene [Source:MGI Symbol;Acc:MGI:1916692]	13	1044	0.429119	0	3	0	0	3	0
ENSMUSG00000052334	1700024B05Rik	RIKEN cDNA 1700024B05 gene [Source:MGI Symbol;Acc:MGI:1922768]	14	1576	0.410533	0	0	0	0	0	0
ENSMUSG00000099994	1700024B18Rik	RIKEN cDNA 1700024B18 gene [Source:MGI Symbol;Acc:MGI:1916643]	14	423	0.434988	0	0	0	0	0	0
ENSMUSG00000072473	1700024G13Rik	RIKEN cDNA 1700024G13 gene [Source:MGI Symbol;Acc:MGI:1914335]	14	850	0.501176	0	0	0	0	0	0
ENSMUSG00000113825	1700024I08Rik	RIKEN cDNA 1700024I08 gene [Source:MGI Symbol;Acc:MGI:1922772]	13	984	0.438008	0	0	0	0	0	0
ENSMUSG00000069890	1700024J04Rik	RIKEN cDNA 1700024J04 gene [Source:MGI Symbol;Acc:MGI:1919098]	11	1821	0.449204	0	0	0	0	0	0
ENSMUSG00000106947	1700025A08Rik	RIKEN cDNA 1700025A08 gene [Source:MGI Symbol;Acc:MGI:1916650]	5	609	0.625616	0	1	0	1	1	4
ENSMUSG00000101113	1700025B11Rik	RIKEN cDNA 1700025B11 gene [Source:MGI Symbol;Acc:MGI:1923659]	15	553	0.455696	0	0	0	0	0	0
ENSMUSG00000078935	1700025C18Rik	RIKEN cDNA 1700025C18 gene [Source:MGI Symbol;Acc:MGI:1919461]	2	702	0.539886	4	0	0	0	0	0
ENSMUSG00000086760	1700025D23Rik	RIKEN cDNA 1700025D23 gene [Source:MGI Symbol;Acc:MGI:1916667]	11	846	0.481087	0	0	0	0	0	0
ENSMUSG00000100558	1700025F24Rik	RIKEN cDNA 1700025F24 gene [Source:MGI Symbol;Acc:MGI:1914331]	10	894	0.473154	1	0	0	0	0	0
ENSMUSG00000032666	1700025G04Rik	RIKEN cDNA 1700025G04 gene [Source:MGI Symbol;Acc:MGI:1916649]	1	11788	0.453936	704	662	545	543	965	566
ENSMUSG00000101888	1700025H01Rik	RIKEN cDNA 1700025H01 gene [Source:MGI Symbol;Acc:MGI:1922781]	16	547	0.548446	0	0	0	0	0	0
ENSMUSG00000108409	1700025J12Rik	RIKEN cDNA 1700025J12 gene [Source:MGI Symbol;Acc:MGI:1916657]	7	630	0.503175	0	0	0	0	0	0
ENSMUSG00000112482	1700025K04Rik	RIKEN cDNA 1700025K04 gene [Source:MGI Symbol;Acc:MGI:1913584]	10	1174	0.402896	0	0	0	0	0	0
ENSMUSG00000099747	1700025K24Rik	RIKEN cDNA 1700025K24 gene [Source:MGI Symbol;Acc:MGI:1916668]	17	740	0.439189	0	0	0	0	0	0
ENSMUSG00000109962	1700025L06Rik	RIKEN cDNA 1700025L06 gene [Source:MGI Symbol;Acc:MGI:1914183]	7	2169	0.537114	0	0	0	0	0	0
ENSMUSG00000100175	1700025M24Rik	RIKEN cDNA 1700025M24 gene [Source:MGI Symbol;Acc:MGI:1919526]	5	772	0.487047	0	0	0	0	0	0
ENSMUSG00000090200	1700025N21Rik	RIKEN cDNA 1700025N21 gene [Source:MGI Symbol;Acc:MGI:1916665]	10	686	0.504373	0	2	0	0	0	0
ENSMUSG00000100121	1700025N23Rik	RIKEN cDNA 1700025N23 gene [Source:MGI Symbol;Acc:MGI:1917236]	6	915	0.500546	0	0	3	0	0	0
ENSMUSG00000028244	1700025O08Rik	RIKEN cDNA 1700025O08 gene [Source:MGI Symbol;Acc:MGI:1917234]	4	456	0.394737	0	0	0	0	0	0
ENSMUSG00000086379	1700026D11Rik	RIKEN cDNA 1700026D11 gene [Source:MGI Symbol;Acc:MGI:1917621]	2	2929	0.499829	0	0	0	0	0	0
ENSMUSG00000101854	1700026F02Rik	RIKEN cDNA 1700026F02 gene [Source:MGI Symbol;Acc:MGI:1916669]	8	1679	0.472901	5	3	5	0	4	10
ENSMUSG00000073976	1700026J12Rik	RIKEN cDNA 1700026J12 gene [Source:MGI Symbol;Acc:MGI:1920505]	16	1155	0.404329	0	0	0	0	0	0
ENSMUSG00000097716	1700026J14Rik	RIKEN cDNA 1700026J14 gene [Source:MGI Symbol;Acc:MGI:1916682]	6	794	0.518892	4	1	7	3	5	0
ENSMUSG00000114681	1700026N04Rik	RIKEN cDNA 1700026N04 gene [Source:MGI Symbol;Acc:MGI:1919521]	13	643	0.589425	10	6	15	5	11	12
ENSMUSG00000084864	1700027A07Rik	RIKEN cDNA 1700027A07 gene [Source:MGI Symbol;Acc:MGI:1917246]	15	458	0.5	0	0	0	0	0	0
ENSMUSG00000101968	1700027A15Rik	RIKEN cDNA 1700027A15 gene [Source:MGI Symbol;Acc:MGI:1916699]	1	1396	0.482808	0	0	0	0	0	0
ENSMUSG00000107737	1700027F06Rik	RIKEN cDNA 1700027F06 gene [Source:MGI Symbol;Acc:MGI:1919518]	6	243	0.506173	0	0	0	0	0	0
ENSMUSG00000100911	1700027F09Rik	RIKEN cDNA 1700027F09 gene [Source:MGI Symbol;Acc:MGI:1917249]	5	767	0.436767	0	0	0	0	0	0
ENSMUSG00000100799	1700027H10Rik	RIKEN cDNA 1700027H10 gene [Source:MGI Symbol;Acc:MGI:1919524]	3	584	0.421233	0	0	0	0	0	0
ENSMUSG00000098304	1700027I24Rik	RIKEN cDNA 1700027I24 gene [Source:MGI Symbol;Acc:MGI:1922817]	9	696	0.395115	1	0	0	0	1	0
ENSMUSG00000111422	1700027J07Rik	RIKEN cDNA 1700027J07 gene [Source:MGI Symbol;Acc:MGI:1916693]	10	2782	0.489216	1	0	0	0	3	0
ENSMUSG00000099417	1700028B04Rik	RIKEN cDNA 1700028B04 gene [Source:MGI Symbol;Acc:MGI:1917251]	7	971	0.54171	0	0	3	0	0	0
ENSMUSG00000101683	1700028D13Rik	RIKEN cDNA 1700028D13 gene [Source:MGI Symbol;Acc:MGI:1922819]	5	718	0.523677	0	0	0	0	0	0
ENSMUSG00000097321	1700028E10Rik	RIKEN cDNA 1700028E10 gene [Source:MGI Symbol;Acc:MGI:1916713]	5	6927	0.4507	38	21	70	43	84	26
ENSMUSG00000056821	1700028I16Rik	RIKEN cDNA 1700028I16 gene [Source:MGI Symbol;Acc:MGI:1917253]	10	1056	0.534091	0	0	0	4	0	0
ENSMUSG00000038782	1700028J19Rik	RIKEN cDNA 1700028J19 gene [Source:MGI Symbol;Acc:MGI:1917254]	7	2471	0.503035	2	0	0	0	0	8
ENSMUSG00000089798	1700028K03Rik	RIKEN cDNA 1700028K03 gene [Source:MGI Symbol;Acc:MGI:1923671]	5	7963	0.402612	11	1	13	4	14	0
ENSMUSG00000101334	1700028M03Rik	RIKEN cDNA 1700028M03 gene [Source:MGI Symbol;Acc:MGI:1916710]	3	476	0.468487	0	0	0	0	0	0
ENSMUSG00000078635	1700028N14Rik	RIKEN cDNA 1700028N14 gene [Source:MGI Symbol;Acc:MGI:1920530]	11	747	0.570281	10	12	6	5	8	10
ENSMUSG00000033053	1700028P14Rik	RIKEN cDNA 1700028P14 gene [Source:MGI Symbol;Acc:MGI:1914733]	19	875	0.460571	1	0	0	0	0	0
ENSMUSG00000086823	1700028P15Rik	RIKEN cDNA 1700028P15 gene [Source:MGI Symbol;Acc:MGI:1922905]	2	3553	0.449761	0	0	0	0	0	0
ENSMUSG00000100759	1700029B22Rik	RIKEN cDNA 1700029B22 gene [Source:MGI Symbol;Acc:MGI:1916745]	7	699	0.484979	0	0	0	0	0	0
ENSMUSG00000102834	1700029B24Rik	RIKEN cDNA 1700029B24 gene [Source:MGI Symbol;Acc:MGI:1919533]	3	497	0.444668	0	0	0	0	0	0
ENSMUSG00000100557	1700029E06Rik	RIKEN cDNA 1700029E06 gene [Source:MGI Symbol;Acc:MGI:1919500]	5	757	0.418758	0	0	0	0	0	0
ENSMUSG00000052075	1700029F12Rik	RIKEN cDNA 1700029F12 gene [Source:MGI Symbol;Acc:MGI:1913729]	13	1140	0.504386	0	0	0	0	0	0
ENSMUSG00000031452	1700029H14Rik	RIKEN cDNA 1700029H14 gene [Source:MGI Symbol;Acc:MGI:1913751]	8	1421	0.546094	0	1	11	0	0	0
ENSMUSG00000044916	1700029I15Rik	RIKEN cDNA 1700029I15 gene [Source:MGI Symbol;Acc:MGI:1916742]	2	1348	0.549703	16	24	36	14	6	17
ENSMUSG00000099968	1700029J03Rik	RIKEN cDNA 1700029J03 gene [Source:MGI Symbol;Acc:MGI:1919514]	16	1527	0.499673	0	0	0	0	0	0
ENSMUSG00000071103	1700029J07Rik	RIKEN cDNA 1700029J07 gene [Source:MGI Symbol;Acc:MGI:1916729]	8	3006	0.452096	146	102	155	78	217	61
ENSMUSG00000101189	1700029M03Rik	RIKEN cDNA 1700029M03 gene [Source:MGI Symbol;Acc:MGI:1916726]	1	685	0.414599	0	0	0	1	0	0
ENSMUSG00000086788	1700029M20Rik	RIKEN cDNA 1700029M20 gene [Source:MGI Symbol;Acc:MGI:1913597]	4	3024	0.503307	0	0	0	0	0	0
ENSMUSG00000098144	1700029N11Rik	RIKEN cDNA 1700029N11 gene [Source:MGI Symbol;Acc:MGI:1916741]	13	1248	0.463942	0	0	0	0	0	2
ENSMUSG00000085333	1700030A11Rik	RIKEN cDNA 1700030A11 gene [Source:MGI Symbol;Acc:MGI:1921429]	17	888	0.488739	0	0	0	0	0	0
ENSMUSG00000099759	1700030C10Rik	RIKEN cDNA 1700030C10 gene [Source:MGI Symbol;Acc:MGI:1916763]	12	1735	0.536599	12	58	39	4	10	0
ENSMUSG00000091071	1700030C10Rik	RIKEN cDNA 1700030C10 gene [Source:MGI Symbol;Acc:MGI:1916763]	12	1471	0.586676	6	3	0	4	5	5
ENSMUSG00000086459	1700030C12Rik	RIKEN cDNA 1700030C12 gene [Source:MGI Symbol;Acc:MGI:1919496]	11	1169	0.457656	2	1	7	13	6	1
ENSMUSG00000087148	1700030C14Rik	RIKEN cDNA 1700030C14 gene [Source:MGI Symbol;Acc:MGI:1922912]	2	756	0.531746	1	0	0	0	0	0
ENSMUSG00000112619	1700030E10Rik	RIKEN cDNA 1700030E10 gene [Source:MGI Symbol;Acc:MGI:1916765]	10	721	0.474341	0	0	0	0	0	0
ENSMUSG00000099869	1700030F04Rik	RIKEN cDNA 1700030F04 gene [Source:MGI Symbol;Acc:MGI:1919513]	6	802	0.478803	0	0	0	0	0	0
ENSMUSG00000103387	1700030I03Rik	RIKEN cDNA 1700030I03 gene [Source:MGI Symbol;Acc:MGI:1916753]	12	942	0.485138	0	1	0	1	4	1
ENSMUSG00000031847	1700030J22Rik	RIKEN cDNA 1700030J22 gene [Source:MGI Symbol;Acc:MGI:1916778]	8	2996	0.517023	33	27	87	28	69	22
ENSMUSG00000052794	1700030K09Rik	RIKEN cDNA 1700030K09 gene [Source:MGI Symbol;Acc:MGI:1919504]	8	2970	0.515488	61	71	48	72	60	65
ENSMUSG00000099508	1700030L20Rik	RIKEN cDNA 1700030L20 gene [Source:MGI Symbol;Acc:MGI:1917305]	3	985	0.434518	0	0	0	0	0	0
ENSMUSG00000113179	1700030L22Rik	RIKEN cDNA 1700030L22 gene [Source:MGI Symbol;Acc:MGI:1922826]	12	865	0.43237	0	0	0	0	0	0
ENSMUSG00000097424	1700030M09Rik	RIKEN cDNA 1700030M09 gene [Source:MGI Symbol;Acc:MGI:1919509]	8	1102	0.539927	0	0	0	0	0	0
ENSMUSG00000100969	1700030N03Rik	RIKEN cDNA 1700030N03 gene [Source:MGI Symbol;Acc:MGI:1917261]	19	5310	0.458569	0	0	0	0	0	0
ENSMUSG00000106800	1700030N18Rik	RIKEN cDNA 1700030N18 gene [Source:MGI Symbol;Acc:MGI:1917266]	5	966	0.494824	0	0	0	0	0	0
ENSMUSG00000100198	1700030O20Rik	RIKEN cDNA 1700030O20 gene [Source:MGI Symbol;Acc:MGI:1919536]	10	594	0.491582	0	1	2	0	2	0
ENSMUSG00000092239	1700031A10Rik	RIKEN cDNA 1700031A10 gene [Source:MGI Symbol;Acc:MGI:1920536]	17	656	0.492378	0	0	0	0	0	0
ENSMUSG00000032894	1700031F05Rik	RIKEN cDNA 1700031F05 gene [Source:MGI Symbol;Acc:MGI:1920550]	X	1444	0.488227	0	0	0	0	0	0
ENSMUSG00000047046	1700031F10Rik	RIKEN cDNA 1700031F10 gene [Source:MGI Symbol;Acc:MGI:1920567]	6	639	0.549296	4	3	1	0	4	0
ENSMUSG00000099863	1700031L13Rik	RIKEN cDNA 1700031L13 gene [Source:MGI Symbol;Acc:MGI:1914577]	5	960	0.361458	0	0	0	0	0	0
ENSMUSG00000099353	1700031M16Rik	RIKEN cDNA 1700031M16 gene [Source:MGI Symbol;Acc:MGI:1920552]	15	1666	0.455582	0	0	0	0	0	0
ENSMUSG00000100315	1700031P21Rik	RIKEN cDNA 1700031P21 gene [Source:MGI Symbol;Acc:MGI:1920528]	12	568	0.443662	0	0	0	0	2	0
ENSMUSG00000097302	1700034B16Rik	RIKEN cDNA 1700034B16 gene [Source:MGI Symbol;Acc:MGI:1920532]	18	722	0.51108	0	0	0	0	0	0
ENSMUSG00000024532	1700034E13Rik	RIKEN cDNA 1700034E13 gene [Source:MGI Symbol;Acc:MGI:1925664]	18	490	0.446939	0	0	0	0	0	0
ENSMUSG00000097962	1700034G24Rik	RIKEN cDNA 1700034G24 gene [Source:MGI Symbol;Acc:MGI:1914575]	5	1081	0.53284	0	0	0	0	0	0
ENSMUSG00000055833	1700034H15Rik	RIKEN cDNA 1700034H15 gene [Source:MGI Symbol;Acc:MGI:1921515]	1	6099	0.496475	20	23	68	16	31	17
ENSMUSG00000074619	1700034I23Rik	RIKEN cDNA 1700034I23 gene [Source:MGI Symbol;Acc:MGI:1920547]	3	2348	0.441227	0	4	0	0	0	0
ENSMUSG00000103287	1700034J04Rik	RIKEN cDNA 1700034J04 gene [Source:MGI Symbol;Acc:MGI:1920554]	12	750	0.492	0	0	0	0	0	0
ENSMUSG00000040163	1700034J05Rik	RIKEN cDNA 1700034J05 gene [Source:MGI Symbol;Acc:MGI:1920594]	6	3007	0.440306	0	0	0	0	0	0
ENSMUSG00000100294	1700034K08Rik	RIKEN cDNA 1700034K08 gene [Source:MGI Symbol;Acc:MGI:1925599]	9	824	0.436893	0	0	0	0	0	0
ENSMUSG00000097893	1700034P13Rik	RIKEN cDNA 1700034P13 gene [Source:MGI Symbol;Acc:MGI:1920581]	1	3101	0.501774	0	1	4	1	0	3
ENSMUSG00000095956	1700036A12Rik	RIKEN cDNA 1700036A12 gene [Source:MGI Symbol;Acc:MGI:1920548]	9	1828	0.502735	0	0	0	5	0	4
ENSMUSG00000099995	1700036G14Rik	RIKEN cDNA 1700036G14 gene [Source:MGI Symbol;Acc:MGI:1920533]	3	542	0.472325	0	0	0	0	0	0
ENSMUSG00000086185	1700036O09Rik	RIKEN cDNA 1700036O09 gene [Source:MGI Symbol;Acc:MGI:1920512]	X	349	0.346705	0	0	0	0	0	0
ENSMUSG00000085542	1700037C06Rik	RIKEN cDNA 1700037C06 gene [Source:MGI Symbol;Acc:MGI:1921513]	4	874	0.516018	0	0	0	0	0	0
ENSMUSG00000005983	1700037C18Rik	RIKEN cDNA 1700037C18 gene [Source:MGI Symbol;Acc:MGI:1920511]	16	3227	0.537031	15	11	6	6	38	17
ENSMUSG00000114125	1700037F03Rik	RIKEN cDNA 1700037F03 gene [Source:MGI Symbol;Acc:MGI:1914566]	13	365	0.463014	8	3	6	1	0	2
ENSMUSG00000027327	1700037H04Rik	RIKEN cDNA 1700037H04 gene [Source:MGI Symbol;Acc:MGI:1914576]	2	2286	0.552931	133	136	68	117	123	149
ENSMUSG00000092369	1700039E22Rik	RIKEN cDNA 1700039E22 gene [Source:MGI Symbol;Acc:MGI:1920572]	19	770	0.574026	0	0	0	0	0	0
ENSMUSG00000102536	1700039I01Rik	RIKEN cDNA 1700039I01 gene [Source:MGI Symbol;Acc:MGI:1920596]	1	479	0.592902	0	0	0	0	0	0
ENSMUSG00000097933	1700039M10Rik	RIKEN cDNA 1700039M10 gene [Source:MGI Symbol;Acc:MGI:1914768]	14	532	0.37594	0	0	0	0	0	0
ENSMUSG00000104086	1700039M15Rik	RIKEN cDNA 1700039M15 gene [Source:MGI Symbol;Acc:MGI:1921516]	9	1120	0.457143	0	0	0	0	0	0
ENSMUSG00000097515	1700040D17Rik	RIKEN cDNA 1700040D17 gene [Source:MGI Symbol;Acc:MGI:1923852]	3	998	0.435872	2	3	8	0	0	1
ENSMUSG00000113997	1700040E09Rik	RIKEN cDNA 1700040E09 gene [Source:MGI Symbol;Acc:MGI:1924240]	12	606	0.410891	0	0	0	0	0	0
ENSMUSG00000100667	1700040F15Rik	RIKEN cDNA 1700040F15 gene [Source:MGI Symbol;Acc:MGI:1920579]	Y	931	0.351235	0	0	0	0	0	0
ENSMUSG00000101568	1700040F17Rik	RIKEN cDNA 1700040F17 gene [Source:MGI Symbol;Acc:MGI:1920584]	15	817	0.423501	0	0	0	0	0	0
ENSMUSG00000103840	1700040K01Rik	RIKEN cDNA 1700040K01 gene [Source:MGI Symbol;Acc:MGI:1920517]	1	438	0.452055	0	0	0	0	0	0
ENSMUSG00000107406	1700040L08Rik	RIKEN cDNA 1700040L08 gene [Source:MGI Symbol;Acc:MGI:1920544]	6	541	0.441774	3	0	2	0	6	0
ENSMUSG00000116260	1700041B01Rik	RIKEN cDNA 1700041B01 gene [Source:MGI Symbol;Acc:MGI:1925873]	15	503	0.580517	0	0	0	0	0	0
ENSMUSG00000100282	1700041C23Rik	RIKEN cDNA 1700041C23 gene [Source:MGI Symbol;Acc:MGI:1914569]	9	395	0.379747	0	0	0	0	0	0
ENSMUSG00000054822	1700041G16Rik	RIKEN cDNA 1700041G16 gene [Source:MGI Symbol;Acc:MGI:1920549]	8	1824	0.501096	3	2	5	1	0	0
ENSMUSG00000104845	1700041I07Rik	RIKEN cDNA 1700041I07 gene [Source:MGI Symbol;Acc:MGI:1920523]	5	435	0.505747	1	0	0	0	0	0
ENSMUSG00000087010	1700041M05Rik	RIKEN cDNA 1700041M05 gene [Source:MGI Symbol;Acc:MGI:1920510]	4	306	0.493464	0	0	0	0	0	0
ENSMUSG00000100857	1700041M19Rik	RIKEN cDNA 1700041M19 gene [Source:MGI Symbol;Acc:MGI:1923851]	16	2947	0.425178	0	0	0	0	0	0
ENSMUSG00000105991	1700042D02Rik	RIKEN cDNA 1700042D02 gene [Source:MGI Symbol;Acc:MGI:1920587]	9	389	0.44473	0	0	0	0	0	0
ENSMUSG00000078593	1700042G07Rik	RIKEN cDNA 1700042G07 gene [Source:MGI Symbol;Acc:MGI:1914573]	4	385	0.574026	0	0	0	0	0	0
ENSMUSG00000087044	1700042G15Rik	RIKEN cDNA 1700042G15 gene [Source:MGI Symbol;Acc:MGI:1920599]	4	664	0.533133	0	0	0	0	0	0
ENSMUSG00000112878	1700042O05Rik	RIKEN cDNA 1700042O05 gene [Source:MGI Symbol;Acc:MGI:1920540]	10	584	0.40411	0	0	0	0	0	0
ENSMUSG00000086391	1700042O10Rik	RIKEN cDNA 1700042O10 gene [Source:MGI Symbol;Acc:MGI:1920571]	11	1075	0.466977	0	1	0	0	0	0
ENSMUSG00000099911	1700044C05Rik	RIKEN cDNA 1700044C05 gene [Source:MGI Symbol;Acc:MGI:1920556]	14	898	0.453229	0	0	0	0	0	0
ENSMUSG00000100297	1700044K03Rik	RIKEN cDNA 1700044K03 gene [Source:MGI Symbol;Acc:MGI:1914571]	18	377	0.408488	0	0	0	0	0	0
ENSMUSG00000078492	1700045H11Rik	RIKEN cDNA 1700045H11 gene [Source:MGI Symbol;Acc:MGI:1920598]	4	593	0.485666	0	0	0	0	0	0
ENSMUSG00000104526	1700045I11Rik	RIKEN cDNA 1700045I11 gene [Source:MGI Symbol;Acc:MGI:1920600]	4	493	0.602434	0	0	0	0	0	0
ENSMUSG00000085561	1700046C09Rik	RIKEN cDNA 1700046C09 gene [Source:MGI Symbol;Acc:MGI:1920557]	11	543	0.410681	0	0	0	0	0	0
ENSMUSG00000085437	1700047A11Rik	RIKEN cDNA 1700047A11 gene [Source:MGI Symbol;Acc:MGI:1923854]	8	821	0.439708	4	0	1	0	0	0
ENSMUSG00000115294	1700047E10Rik	RIKEN cDNA 1700047E10 gene [Source:MGI Symbol;Acc:MGI:1921578]	14	568	0.498239	0	0	0	0	0	0
ENSMUSG00000085549	1700047F07Rik	RIKEN cDNA 1700047F07 gene [Source:MGI Symbol;Acc:MGI:1920570]	4	1050	0.50381	0	0	4	0	0	0
ENSMUSG00000099349	1700047G03Rik	RIKEN cDNA 1700047G03 gene [Source:MGI Symbol;Acc:MGI:1920589]	15	1493	0.486269	0	0	0	0	0	0
ENSMUSG00000110717	1700047G07Rik	RIKEN cDNA 1700047G07 gene [Source:MGI Symbol;Acc:MGI:1920573]	8	902	0.44235	0	0	0	0	0	0
ENSMUSG00000087347	1700047K16Rik	RIKEN cDNA 1700047K16 gene [Source:MGI Symbol;Acc:MGI:1920585]	11	886	0.513544	1	6	6	0	9	0
ENSMUSG00000101762	1700047L14Rik	RIKEN cDNA 1700047L14 gene [Source:MGI Symbol;Acc:MGI:1920545]	5	511	0.418787	0	0	0	0	0	0
ENSMUSG00000100147	1700047M11Rik	RIKEN cDNA 1700047M11 gene [Source:MGI Symbol;Acc:MGI:1914580]	1	2846	0.455727	0	3	1	0	2	3
ENSMUSG00000102356	1700047N06Rik	RIKEN cDNA 1700047N06 gene [Source:MGI Symbol;Acc:MGI:1923853]	1	920	0.388043	0	0	0	0	0	0
ENSMUSG00000109594	1700047O18Rik	RIKEN cDNA 1700047O18 gene [Source:MGI Symbol;Acc:MGI:1920668]	7	743	0.429341	3	0	0	0	0	0
ENSMUSG00000105274	1700048F04Rik	RIKEN cDNA 1700048F04 gene [Source:MGI Symbol;Acc:MGI:1920646]	5	1064	0.460526	0	0	0	0	2	0
ENSMUSG00000085637	1700048M11Rik	RIKEN cDNA 1700048M11 gene [Source:MGI Symbol;Acc:MGI:1920636]	16	485	0.478351	0	0	0	0	0	0
ENSMUSG00000118016	1700048O14Rik	RIKEN cDNA 1700048O14 gene [Source:MGI Symbol;Acc:MGI:1920683]	19	521	0.424184	0	0	0	0	0	0
ENSMUSG00000043773	1700048O20Rik	RIKEN cDNA 1700048O20 gene [Source:MGI Symbol;Acc:MGI:1920637]	9	2099	0.45879	10	16	22	0	16	3
ENSMUSG00000112333	1700048P04Rik	RIKEN cDNA 1700048P04 gene [Source:MGI Symbol;Acc:MGI:1920605]	10	369	0.485095	0	0	0	0	0	0
ENSMUSG00000085077	1700049E15Rik	RIKEN cDNA 1700049E15 gene [Source:MGI Symbol;Acc:MGI:1920644]	6	1047	0.484241	0	0	0	0	0	0
ENSMUSG00000079271	1700049E17Rik1	RIKEN cDNA 1700049E17 gene, gene 1 [Source:MGI Symbol;Acc:MGI:1920665]	14	1761	0.375355	0	0	0	0	0	0
ENSMUSG00000090440	1700049E17Rik2	tandem duplication of RIKEN cDNA 1700049E17 gene, gene 2 [Source:MGI Symbol;Acc:MGI:3796510]	14	1757	0.376209	0	0	0	0	0	0
ENSMUSG00000101553	1700049E22Rik	RIKEN cDNA 1700049E22 gene [Source:MGI Symbol;Acc:MGI:1920645]	6	507	0.532544	0	0	0	0	0	0
ENSMUSG00000043859	1700049L16Rik	RIKEN cDNA 1700049L16 gene [Source:MGI Symbol;Acc:MGI:1920633]	10	543	0.500921	0	0	0	0	0	0
ENSMUSG00000086951	1700051A21Rik	RIKEN cDNA 1700051A21 gene [Source:MGI Symbol;Acc:MGI:1920616]	11	1800	0.536111	1	0	0	1	0	0
ENSMUSG00000108263	1700051K13Rik	RIKEN cDNA 1700051K13 gene [Source:MGI Symbol;Acc:MGI:1920602]	6	696	0.41092	0	0	0	0	0	0
ENSMUSG00000103341	1700051O22Rik	RIKEN cDNA 1700051O22 Gene [Source:MGI Symbol;Acc:MGI:3704315]	8	638	0.556426	0	2	2	0	0	0
ENSMUSG00000105297	1700052H01Rik	RIKEN cDNA 1700052H01 gene [Source:MGI Symbol;Acc:MGI:1920712]	3	1025	0.470244	0	0	0	0	0	0
ENSMUSG00000101912	1700052I22Rik	RIKEN cDNA 1700052I22 gene [Source:MGI Symbol;Acc:MGI:1914590]	12	379	0.46438	0	0	0	0	0	0
ENSMUSG00000099681	1700052K11Rik	RIKEN cDNA 1700052K11 gene [Source:MGI Symbol;Acc:MGI:1920681]	11	3708	0.488943	46	28	58	42	61	23
ENSMUSG00000099988	1700054A03Rik	RIKEN cDNA 1700054A03 gene [Source:MGI Symbol;Acc:MGI:1925707]	19	4290	0.47296	0	0	0	0	0	1
ENSMUSG00000097001	1700054K02Rik	RIKEN cDNA 1700054K02 gene [Source:MGI Symbol;Acc:MGI:1925600]	1	376	0.470745	0	0	0	0	0	0
ENSMUSG00000100219	1700054K19Rik	RIKEN cDNA 1700054K19 gene [Source:MGI Symbol;Acc:MGI:1914586]	6	452	0.45354	0	0	0	0	0	0
ENSMUSG00000085889	1700054M17Rik	RIKEN cDNA 1700054M17 gene [Source:MGI Symbol;Acc:MGI:1920608]	2	445	0.478652	0	0	0	0	0	0
ENSMUSG00000111753	1700054O05Rik	RIKEN cDNA 1700054O05 gene [Source:MGI Symbol;Acc:MGI:1920606]	10	555	0.502703	0	0	0	0	0	0
ENSMUSG00000104183	1700054O19Rik	RIKEN cDNA 1700054O19 gene [Source:MGI Symbol;Acc:MGI:1921522]	14	868	0.47235	11	23	1	10	0	12
ENSMUSG00000093616	1700055C04Rik	RIKEN cDNA 1700055C04 gene [Source:MGI Symbol;Acc:MGI:1920647]	9	355	0.549296	0	0	0	0	0	0
ENSMUSG00000070997	1700055D18Rik	RIKEN cDNA 1700055D18 gene [Source:MGI Symbol;Acc:MGI:1920655]	4	3720	0.49328	11	17	41	14	22	26
ENSMUSG00000044854	1700056E22Rik	RIKEN cDNA 1700056E22 gene [Source:MGI Symbol;Acc:MGI:1920613]	1	1272	0.628931	7	16	32	5	17	18
ENSMUSG00000084792	1700056N10Rik	RIKEN cDNA 1700056N10 gene [Source:MGI Symbol;Acc:MGI:1920642]	16	1043	0.471716	39	39	23	15	48	36
ENSMUSG00000074139	1700057G04Rik	RIKEN cDNA 1700057G04 gene [Source:MGI Symbol;Acc:MGI:1925709]	9	1974	0.448835	2	0	0	0	0	0
ENSMUSG00000084757	1700057H15Rik	RIKEN cDNA 1700057H15 gene [Source:MGI Symbol;Acc:MGI:1925710]	4	1252	0.515974	0	0	0	0	0	0
ENSMUSG00000086007	1700057H21Rik	RIKEN cDNA 1700057H21 gene [Source:MGI Symbol;Acc:MGI:1920625]	2	697	0.464849	0	0	0	0	0	0
ENSMUSG00000089636	1700058P15Rik	RIKEN cDNA 1700058P15 gene [Source:MGI Symbol;Acc:MGI:1920627]	7	413	0.479419	0	0	4	4	3	0
ENSMUSG00000086887	1700060C16Rik	RIKEN cDNA 1700060C16 gene [Source:MGI Symbol;Acc:MGI:1920675]	6	645	0.496124	0	0	0	0	0	0
ENSMUSG00000078957	1700060C20Rik	RIKEN cDNA 1700060C20 gene [Source:MGI Symbol;Acc:MGI:1920649]	2	605	0.52562	0	0	0	0	0	0
ENSMUSG00000084970	1700060J05Rik	RIKEN cDNA 1700060J05 gene [Source:MGI Symbol;Acc:MGI:1920641]	4	1060	0.471698	0	0	0	0	0	0
ENSMUSG00000099407	1700060O08Rik	RIKEN cDNA 1700060O08 gene [Source:MGI Symbol;Acc:MGI:1914585]	12	281	0.469751	0	0	0	0	0	0
ENSMUSG00000117966	1700061A03Rik	RIKEN cDNA 1700061A03 gene [Source:MGI Symbol;Acc:MGI:1920664]	19	455	0.536264	2	4	4	0	5	0
ENSMUSG00000102060	1700061E17Rik	RIKEN cDNA 1700061E17 gene [Source:MGI Symbol;Acc:MGI:3642196]	9	1067	0.499531	5	1	6	0	10	0
ENSMUSG00000085759	1700061E18Rik	RIKEN cDNA 1700061E18 gene [Source:MGI Symbol;Acc:MGI:1924241]	13	588	0.460884	0	0	0	0	0	0
ENSMUSG00000085580	1700061F12Rik	RIKEN cDNA 1700061F12 gene [Source:MGI Symbol;Acc:MGI:1920688]	2	876	0.438356	0	0	0	0	0	0
ENSMUSG00000084948	1700061H18Rik	RIKEN cDNA 1700061H18 gene [Source:MGI Symbol;Acc:MGI:1920711]	18	1081	0.398705	0	0	0	0	0	0
ENSMUSG00000028009	1700061I17Rik	RIKEN cDNA 1700061I17 gene [Source:MGI Symbol;Acc:MGI:1920612]	3	1962	0.448522	3	0	0	0	0	0
ENSMUSG00000086366	1700061J23Rik	RIKEN cDNA 1700061J23 gene [Source:MGI Symbol;Acc:MGI:1924243]	11	537	0.469274	0	0	0	1	0	0
ENSMUSG00000110464	1700061N14Rik	RIKEN cDNA 1700061N14 gene [Source:MGI Symbol;Acc:MGI:1920682]	8	463	0.479482	1	0	1	4	0	9
ENSMUSG00000114390	1700062C10Rik	RIKEN cDNA 1700062C10 gene [Source:MGI Symbol;Acc:MGI:1920690]	14	1659	0.414105	0	0	0	0	0	0
ENSMUSG00000100062	1700063A18Rik	RIKEN cDNA 1700063A18 gene [Source:MGI Symbol;Acc:MGI:1920704]	1	356	0.426966	0	0	0	0	0	0
ENSMUSG00000100837	1700063D05Rik	RIKEN cDNA 1700063D05 gene [Source:MGI Symbol;Acc:MGI:1925750]	9	1529	0.489209	0	0	0	0	0	0
ENSMUSG00000040657	1700063H04Rik	RIKEN cDNA 1700063H04 gene [Source:MGI Symbol;Acc:MGI:1921519]	6	817	0.501836	0	0	0	0	0	0
ENSMUSG00000099266	1700063H06Rik	RIKEN cDNA 1700063H06 gene [Source:MGI Symbol;Acc:MGI:1920614]	9	445	0.388764	0	0	0	0	3	0
ENSMUSG00000103463	1700063I16Rik	RIKEN cDNA 1700063I16 gene [Source:MGI Symbol;Acc:MGI:1925877]	1	611	0.481178	0	0	0	0	0	0
ENSMUSG00000117080	1700063J08Rik	RIKEN cDNA 1700063J08 gene [Source:MGI Symbol;Acc:MGI:1920700]	17	554	0.554152	6	3	1	0	3	0
ENSMUSG00000102036	1700063K16Rik	RIKEN cDNA 1700063K16 gene [Source:MGI Symbol;Acc:MGI:1923860]	16	1203	0.413965	0	0	0	0	0	3
ENSMUSG00000101978	1700063O14Rik	RIKEN cDNA 1700063O14 gene [Source:MGI Symbol;Acc:MGI:1920702]	5	492	0.457317	0	0	0	0	0	0
ENSMUSG00000082766	1700064H15Rik	RIKEN cDNA 1700064H15 gene [Source:MGI Symbol;Acc:MGI:1920674]	3	394	0.456853	0	0	1	0	3	1
ENSMUSG00000100681	1700064J06Rik	RIKEN cDNA 1700064J06 gene [Source:MGI Symbol;Acc:MGI:1920650]	10	386	0.476684	0	0	0	0	0	0
ENSMUSG00000100211	1700064M15Rik	RIKEN cDNA 1700064M15 gene [Source:MGI Symbol;Acc:MGI:1920707]	12	645	0.505426	0	0	0	0	0	0
ENSMUSG00000096655	1700065D16Rik	RIKEN cDNA 1700065D16 gene [Source:MGI Symbol;Acc:MGI:1920660]	9	2905	0.521859	0	0	0	9	0	0
ENSMUSG00000099435	1700065I16Rik	RIKEN cDNA 1700065I16 gene [Source:MGI Symbol;Acc:MGI:1925712]	15	997	0.560682	0	0	0	0	0	0
ENSMUSG00000107341	1700065J11Rik	RIKEN cDNA 1700065J11 gene [Source:MGI Symbol;Acc:MGI:1920659]	6	424	0.471698	0	0	0	0	0	0
ENSMUSG00000100872	1700065J18Rik	RIKEN cDNA 1700065J18 gene [Source:MGI Symbol;Acc:MGI:1920705]	1	393	0.483461	0	0	0	0	0	0
ENSMUSG00000107408	1700065L07Rik	RIKEN cDNA 1700065L07 gene [Source:MGI Symbol;Acc:MGI:1920658]	6	614	0.47557	0	0	0	0	0	0
ENSMUSG00000100134	1700065O20Rik	RIKEN cDNA 1700065O20 gene [Source:MGI Symbol;Acc:MGI:1923859]	18	710	0.412676	0	0	0	0	0	0
ENSMUSG00000101634	1700066B17Rik	RIKEN cDNA 1700066B17 gene [Source:MGI Symbol;Acc:MGI:1920676]	1	1068	0.465356	0	0	0	0	0	0
ENSMUSG00000073598	1700066B19Rik	RIKEN cDNA 1700066B19 gene [Source:MGI Symbol;Acc:MGI:1920699]	18	2837	0.542122	0	4	4	0	0	0
ENSMUSG00000101810	1700066C05Rik	RIKEN cDNA 1700066C05 gene [Source:MGI Symbol;Acc:MGI:1925904]	16	407	0.493857	0	0	0	0	0	0
ENSMUSG00000097717	1700066J03Rik	RIKEN cDNA 1700066J03 gene [Source:MGI Symbol;Acc:MGI:1914589]	13	850	0.502353	0	8	0	1	0	0
ENSMUSG00000038323	1700066M21Rik	RIKEN cDNA 1700066M21 gene [Source:MGI Symbol;Acc:MGI:1920717]	1	3235	0.411747	36	30	107	18	24	15
ENSMUSG00000099605	1700066N21Rik	RIKEN cDNA 1700066N21 gene [Source:MGI Symbol;Acc:MGI:1920721]	5	783	0.404853	0	0	0	0	0	0
ENSMUSG00000085800	1700066O22Rik	RIKEN cDNA 1700066O22 gene [Source:MGI Symbol;Acc:MGI:1920651]	18	2146	0.437558	1	0	0	0	0	0
ENSMUSG00000099378	1700067G17Rik	RIKEN cDNA 1700067G17 gene [Source:MGI Symbol;Acc:MGI:1920725]	1	603	0.475954	0	0	0	0	0	0
ENSMUSG00000046408	1700067K01Rik	RIKEN cDNA 1700067K01 gene [Source:MGI Symbol;Acc:MGI:1920703]	8	1957	0.586101	0	0	0	0	0	0
ENSMUSG00000021545	1700067P10Rik	RIKEN cDNA 1700067P10 gene [Source:MGI Symbol;Acc:MGI:1915474]	17	1437	0.506611	6	0	0	0	0	0
ENSMUSG00000053081	1700069B07Rik	RIKEN cDNA 1700069B07 gene [Source:MGI Symbol;Acc:MGI:1923863]	7	939	0.619808	4	0	0	0	0	0
ENSMUSG00000042184	1700069L16Rik	RIKEN cDNA 1700069L16 gene [Source:MGI Symbol;Acc:MGI:1920726]	5	1520	0.521711	0	0	0	0	0	0
ENSMUSG00000107637	1700069P05Rik	RIKEN cDNA 1700069P05 gene [Source:MGI Symbol;Acc:MGI:1920781]	6	785	0.50828	0	0	0	0	0	0
ENSMUSG00000086376	1700071G01Rik	RIKEN cDNA 1700071G01 gene [Source:MGI Symbol;Acc:MGI:1920735]	5	367	0.452316	0	0	1	0	0	0
ENSMUSG00000080980	1700071K01Rik	RIKEN cDNA 1700071K01 gene [Source:MGI Symbol;Acc:MGI:3588264]	11	819	0.545788	8	4	27	1	13	1
ENSMUSG00000090307	1700071M16Rik	RIKEN cDNA 1700071M16 gene [Source:MGI Symbol;Acc:MGI:1920754]	17	2883	0.42768	3	0	1	0	4	0
ENSMUSG00000100487	1700072B07Rik	RIKEN cDNA 1700072B07 gene [Source:MGI Symbol;Acc:MGI:1920779]	9	445	0.525843	0	0	0	0	0	0
ENSMUSG00000101702	1700072G22Rik	RIKEN cDNA 1700072G22 gene [Source:MGI Symbol;Acc:MGI:1920746]	1	548	0.432482	0	0	0	0	0	0
ENSMUSG00000107744	1700072O05Rik	RIKEN cDNA 1700072O05 gene [Source:MGI Symbol;Acc:MGI:1920755]	6	321	0.489097	0	0	0	0	0	0
ENSMUSG00000087204	1700073E17Rik	RIKEN cDNA 1700073E17 gene [Source:MGI Symbol;Acc:MGI:1920734]	6	1265	0.469565	0	0	0	0	0	0
ENSMUSG00000102231	1700074A21Rik	RIKEN cDNA 1700074A21 gene [Source:MGI Symbol;Acc:MGI:1920732]	1	346	0.393064	0	0	0	0	0	0
ENSMUSG00000099872	1700074H08Rik	RIKEN cDNA 1700074H08 gene [Source:MGI Symbol;Acc:MGI:1920730]	13	555	0.425225	0	0	0	0	0	0
ENSMUSG00000029883	1700074P13Rik	RIKEN cDNA 1700074P13 gene [Source:MGI Symbol;Acc:MGI:1920731]	6	1844	0.395336	0	0	0	0	0	0
ENSMUSG00000117741	1700080C20Rik	RIKEN cDNA 1700080C20 gene [Source:MGI Symbol;Acc:MGI:1925882]	17	186	0.462366	1	0	0	0	0	0
ENSMUSG00000084859	1700080N15Rik	RIKEN cDNA 1700080N15 gene [Source:MGI Symbol;Acc:MGI:1920739]	2	1465	0.430717	0	0	0	2	0	0
ENSMUSG00000105673	1700081B01Rik	RIKEN cDNA 1700081B01 gene [Source:MGI Symbol;Acc:MGI:1920750]	5	769	0.508453	0	0	0	0	0	0
ENSMUSG00000100573	1700081H04Rik	RIKEN cDNA 1700081H04 gene [Source:MGI Symbol;Acc:MGI:1920727]	5	1128	0.492021	0	0	0	0	0	0
ENSMUSG00000113209	1700081N11Rik	RIKEN cDNA 1700081N11 gene [Source:MGI Symbol;Acc:MGI:1920778]	12	688	0.545058	8	13	28	10	4	21
ENSMUSG00000023737	1700082M22Rik	RIKEN cDNA 1700082M22 gene [Source:MGI Symbol;Acc:MGI:1920784]	8	2210	0.403167	3	2	0	8	4	15
ENSMUSG00000100668	1700083H02Rik	RIKEN cDNA 1700083H02 gene [Source:MGI Symbol;Acc:MGI:1914598]	12	637	0.409733	0	0	0	0	0	0
ENSMUSG00000086016	1700084C06Rik	RIKEN cDNA 1700084C06 gene [Source:MGI Symbol;Acc:MGI:1923868]	9	750	0.537333	2	8	1	0	7	0
ENSMUSG00000114333	1700084D21Rik	RIKEN cDNA 1700084D21 gene [Source:MGI Symbol;Acc:MGI:1923970]	13	444	0.484234	2	0	0	0	0	0
ENSMUSG00000100747	1700084E18Rik	RIKEN cDNA 1700084E18 gene [Source:MGI Symbol;Acc:MGI:1914600]	2	1429	0.621414	4	1	7	1	7	0
ENSMUSG00000099639	1700084F23Rik	RIKEN cDNA 1700084F23 gene [Source:MGI Symbol;Acc:MGI:1921530]	13	2105	0.463183	0	0	6	0	0	0
ENSMUSG00000058101	1700084J12Rik	RIKEN cDNA 1700084J12 gene [Source:MGI Symbol;Acc:MGI:1920736]	15	1992	0.4749	0	0	0	0	0	0
ENSMUSG00000057805	1700084M14Rik	RIKEN cDNA 1700084M14 gene [Source:MGI Symbol;Acc:MGI:1920737]	X	559	0.429338	0	0	0	0	0	0
ENSMUSG00000100890	1700085C21Rik	RIKEN cDNA 1700085C21 gene [Source:MGI Symbol;Acc:MGI:1921533]	12	1082	0.48244	0	0	0	0	0	0
ENSMUSG00000115693	1700085D07Rik	RIKEN cDNA 1700085D07 gene [Source:MGI Symbol;Acc:MGI:1920741]	15	318	0.465409	0	0	1	0	0	0
ENSMUSG00000020548	1700086D15Rik	RIKEN cDNA 1700086D15 gene [Source:MGI Symbol;Acc:MGI:1921532]	11	1093	0.504117	19	24	23	1	23	34
ENSMUSG00000071265	1700086L19Rik	RIKEN cDNA 1700086L19 gene [Source:MGI Symbol;Acc:MGI:1921534]	12	1075	0.47814	11	2	5	9	3	2
ENSMUSG00000097080	1700086O06Rik	RIKEN cDNA 1700086O06 gene [Source:MGI Symbol;Acc:MGI:1920766]	18	2027	0.523434	15	27	14	17	24	5
ENSMUSG00000085085	1700086P04Rik	RIKEN cDNA 1700086P04 gene [Source:MGI Symbol;Acc:MGI:1914599]	4	1009	0.46779	0	0	5	4	1	0
ENSMUSG00000115099	1700087I21Rik	RIKEN cDNA 1700087I21 gene [Source:MGI Symbol;Acc:MGI:1923869]	14	4145	0.454282	64	45	45	99	46	79
ENSMUSG00000115723	1700087M22Rik	RIKEN cDNA 1700087M22 gene [Source:MGI Symbol;Acc:MGI:1925717]	14	208	0.418269	0	0	0	0	0	0
ENSMUSG00000033029	1700088E04Rik	RIKEN cDNA 1700088E04 gene [Source:MGI Symbol;Acc:MGI:1920774]	15	5292	0.550454	32	20	54	15	65	23
ENSMUSG00000090462	1700091H14Rik	RIKEN cDNA 1700091H14 gene [Source:MGI Symbol;Acc:MGI:1920803]	14	1391	0.435658	0	0	0	0	0	0
ENSMUSG00000086781	1700092C02Rik	RIKEN cDNA 1700092C02 gene [Source:MGI Symbol;Acc:MGI:1914607]	8	359	0.431755	0	0	0	0	0	0
ENSMUSG00000092499	1700092C10Rik	RIKEN cDNA 1700092C10 gene [Source:MGI Symbol;Acc:MGI:1920804]	14	585	0.505983	0	0	0	0	0	0
ENSMUSG00000085353	1700092C17Rik	RIKEN cDNA 1700092C17 gene [Source:MGI Symbol;Acc:MGI:1921545]	2	424	0.471698	0	0	0	0	0	0
ENSMUSG00000111487	1700092E16Rik	RIKEN cDNA 1700092E16 gene [Source:MGI Symbol;Acc:MGI:1921541]	10	753	0.480744	0	0	0	0	0	0
ENSMUSG00000084811	1700092E19Rik	RIKEN cDNA 1700092E19 gene [Source:MGI Symbol;Acc:MGI:1920826]	13	2006	0.454138	0	0	0	0	0	0
ENSMUSG00000078600	1700092K14Rik	RIKEN cDNA 1700092K14 gene [Source:MGI Symbol;Acc:MGI:1920786]	11	395	0.506329	0	0	0	0	0	0
[truncated: 53,417 more rows]

## Sheet: All Present Genes
gene_id	SYMBOL	DESCRIPTION	SEQNAME	Fold_Change	PValue	FDR	WT_6H_Avg_FPKM	E1_6H_Avg_FPKM
ENSMUSG00000112825	Gm9118	predicted gene 9118 [Source:MGI Symbol;Acc:MGI:3648185]	10	24.6795	1.77533e-11	2.77271e-07	0.507471	12.4646
ENSMUSG00000029380	Cxcl1	chemokine (C-X-C motif) ligand 1 [Source:MGI Symbol;Acc:MGI:108068]	5	4.54638	9.61536e-11	7.50863e-07	15.1107	68.7136
ENSMUSG00000105703	Gm43305	predicted gene 43305 [Source:MGI Symbol;Acc:MGI:5663442]	14	21.6614	1.68531e-09	8.77371e-06	0.0421861	0.951116
ENSMUSG00000048949	Gm6206	predicted pseudogene 6206 [Source:MGI Symbol;Acc:MGI:3644890]	X	13.8447	3.45424e-08	0.000134871	0.231381	3.27526
ENSMUSG00000070462	Tlnrd1	talin rod domain containing 1 [Source:MGI Symbol;Acc:MGI:1891420]	7	-3.71271	4.75931e-08	0.000148662	13.6899	3.68214
ENSMUSG00000049723	Mmp12	matrix metallopeptidase 12 [Source:MGI Symbol;Acc:MGI:97005]	9	19.9119	9.41184e-08	0.000222374	0.0251199	0.526974
ENSMUSG00000006204	Cdcp3	CUB domain containing protein 3 [Source:MGI Symbol;Acc:MGI:1918645]	7	-3.71961	9.9668e-08	0.000222374	8.4564	2.26836
ENSMUSG00000037010	Apln	apelin [Source:MGI Symbol;Acc:MGI:1353624]	X	-129.652	1.60935e-07	0.000314185	0.466751	0
ENSMUSG00000022602	Arc	activity regulated cytoskeletal-associated protein [Source:MGI Symbol;Acc:MGI:88067]	15	-3.26878	1.82453e-07	0.000316616	126.863	38.8156
ENSMUSG00000042436	Mfap4	microfibrillar-associated protein 4 [Source:MGI Symbol;Acc:MGI:1342276]	11	3.91193	2.6904e-07	0.000420187	10.0829	39.4904
ENSMUSG00000027358	Bmp2	bone morphogenetic protein 2 [Source:MGI Symbol;Acc:MGI:88177]	2	4.40271	3.53467e-07	0.000501859	5.36936	23.6415
ENSMUSG00000021998	Lcp1	lymphocyte cytosolic protein 1 [Source:MGI Symbol;Acc:MGI:104808]	14	5.61803	7.57781e-07	0.000986253	0.116375	0.661248
ENSMUSG00000031504	Rab20	RAB20, member RAS oncogene family [Source:MGI Symbol;Acc:MGI:102789]	8	-3.95967	8.71983e-07	0.000990392	7.2842	1.84532
ENSMUSG00000075707	Dio3	deiodinase, iodothyronine type III [Source:MGI Symbol;Acc:MGI:1306782]	12	8.55866	8.87789e-07	0.000990392	0.377374	3.28999
ENSMUSG00000046808	Atp10d	ATPase, class V, type 10D [Source:MGI Symbol;Acc:MGI:2450125]	5	3.34111	1.2954e-06	0.00134877	0.629427	2.10433
ENSMUSG00000016496	Cd274	CD274 antigen [Source:MGI Symbol;Acc:MGI:1926446]	19	3.08639	1.73199e-06	0.00169064	2.85215	8.7979
ENSMUSG00000056313	Tcim	transcriptional and immune response regulator [Source:MGI Symbol;Acc:MGI:1916318]	8	3.86305	1.86416e-06	0.00171262	6.32137	24.4512
ENSMUSG00000005233	Spc25	SPC25, NDC80 kinetochore complex component, homolog (S. cerevisiae) [Source:MGI Symbol;Acc:MGI:1913692]	2	-5.01851	2.62482e-06	0.00214085	14.5018	2.87668
ENSMUSG00000061232	H2-K1	histocompatibility 2, K1, K region [Source:MGI Symbol;Acc:MGI:95904]	17	2.26173	2.64704e-06	0.00214085	21.587	48.8093
ENSMUSG00000029661	Col1a2	collagen, type I, alpha 2 [Source:MGI Symbol;Acc:MGI:88468]	6	3.24615	2.74152e-06	0.00214085	0.920065	2.99083
ENSMUSG00000024378	Stard4	StAR-related lipid transfer (START) domain containing 4 [Source:MGI Symbol;Acc:MGI:2156764]	18	2.66888	3.65137e-06	0.00259783	1.85655	4.94851
ENSMUSG00000024598	Fbn2	fibrillin 2 [Source:MGI Symbol;Acc:MGI:95490]	18	4.4244	3.65939e-06	0.00259783	0.597338	2.6532
ENSMUSG00000102990	Gm37764	predicted gene, 37764 [Source:MGI Symbol;Acc:MGI:5610992]	1	-5.21502	3.88789e-06	0.00264005	6.77911	1.28277
ENSMUSG00000034459	Ifit1	interferon-induced protein with tetratricopeptide repeats 1 [Source:MGI Symbol;Acc:MGI:99450]	19	3.58891	4.31259e-06	0.00280642	3.11784	11.1836
ENSMUSG00000033633	Clec18a	C-type lectin domain family 18, member A [Source:MGI Symbol;Acc:MGI:2672935]	8	3.23104	5.0549e-06	0.00302678	1.03786	3.36067
ENSMUSG00000060802	B2m	beta-2 microglobulin [Source:MGI Symbol;Acc:MGI:88127]	2	3.0791	5.13556e-06	0.00302678	11.132	34.3885
ENSMUSG00000078853	Igtp	interferon gamma induced GTPase [Source:MGI Symbol;Acc:MGI:107729]	11	3.71809	5.23263e-06	0.00302678	4.40734	16.3519
ENSMUSG00000021680	Crhbp	corticotropin releasing hormone binding protein [Source:MGI Symbol;Acc:MGI:88497]	13	4.22716	5.53541e-06	0.00308757	9.6766	40.9426
ENSMUSG00000022085	Pebp4	phosphatidylethanolamine binding protein 4 [Source:MGI Symbol;Acc:MGI:1920773]	14	14.5832	6.36525e-06	0.0033272	0.137931	2.17656
ENSMUSG00000042251	Pm20d1	peptidase M20 domain containing 1 [Source:MGI Symbol;Acc:MGI:2442939]	1	4.00241	6.39109e-06	0.0033272	0.296908	1.19516
ENSMUSG00000118866	Metazoa_SRP	Metazoan signal recognition particle RNA [Source:RFAM;Acc:RF00017]	12	-14.8974	6.67117e-06	0.00336098	10.3874	0.720212
ENSMUSG00000030108	Slc6a13	solute carrier family 6 (neurotransmitter transporter, GABA), member 13 [Source:MGI Symbol;Acc:MGI:95629]	6	4.3371	7.41995e-06	0.0036214	2.59842	11.3088
ENSMUSG00000002980	Bcam	basal cell adhesion molecule [Source:MGI Symbol;Acc:MGI:1929940]	7	2.93248	7.77295e-06	0.00367873	3.48947	10.2543
ENSMUSG00000048126	Col6a3	collagen, type VI, alpha 3 [Source:MGI Symbol;Acc:MGI:88461]	1	-6.19147	8.52034e-06	0.00391384	36.985	5.97368
ENSMUSG00000032649	Colgalt2	collagen beta(1-O)galactosyltransferase 2 [Source:MGI Symbol;Acc:MGI:2138232]	1	3.13307	8.89224e-06	0.00395432	7.8214	24.5099
ENSMUSG00000028980	H6pd	hexose-6-phosphate dehydrogenase (glucose 1-dehydrogenase) [Source:MGI Symbol;Acc:MGI:2140356]	4	2.2606	9.11484e-06	0.00395432	7.28107	16.455
ENSMUSG00000021587	Pcsk1	proprotein convertase subtilisin/kexin type 1 [Source:MGI Symbol;Acc:MGI:97511]	13	-11.4243	1.08205e-05	0.00456742	0.336377	0.0277344
ENSMUSG00000004366	Sst	somatostatin [Source:MGI Symbol;Acc:MGI:98326]	16	-39.5477	1.23809e-05	0.0049796	6.70634	0.13441
ENSMUSG00000036594	H2-Aa	histocompatibility 2, class II antigen A, alpha [Source:MGI Symbol;Acc:MGI:95895]	17	7.66586	1.24347e-05	0.0049796	0.369589	2.8754
ENSMUSG00000062960	Kdr	kinase insert domain protein receptor [Source:MGI Symbol;Acc:MGI:96683]	5	-4.13779	1.32131e-05	0.00515907	6.3684	1.53342
ENSMUSG00000001870	Ltbp1	latent transforming growth factor beta binding protein 1 [Source:MGI Symbol;Acc:MGI:109151]	17	2.66385	1.36979e-05	0.00521791	6.53923	17.4128
ENSMUSG00000018339	Gpx3	glutathione peroxidase 3 [Source:MGI Symbol;Acc:MGI:105102]	11	3.88989	1.63444e-05	0.00607777	54.239	211.034
ENSMUSG00000022324	Matn2	matrilin 2 [Source:MGI Symbol;Acc:MGI:109613]	15	2.5764	1.70318e-05	0.00618612	2.15265	5.53975
ENSMUSG00000033377	Palmd	palmdelphin [Source:MGI Symbol;Acc:MGI:2148896]	3	3.8878	1.77817e-05	0.00631169	0.413882	1.62233
ENSMUSG00000044393	Dsg2	desmoglein 2 [Source:MGI Symbol;Acc:MGI:1196466]	18	3.66899	1.85136e-05	0.00642546	0.353632	1.30433
ENSMUSG00000085794	Vax2os	ventral anterior homeobox 2, opposite strand [Source:MGI Symbol;Acc:MGI:3583301]	6	-3.90958	2.26512e-05	0.00769058	16.3987	4.18497
ENSMUSG00000026934	Lhx3	LIM homeobox protein 3 [Source:MGI Symbol;Acc:MGI:102673]	2	-5.86412	2.34611e-05	0.00779607	1.5496	0.259647
ENSMUSG00000034687	Fras1	Fraser extracellular matrix complex subunit 1 [Source:MGI Symbol;Acc:MGI:2385368]	5	2.13405	2.43021e-05	0.0079073	2.29503	4.90145
ENSMUSG00000029372	Ppbp	pro-platelet basic protein [Source:MGI Symbol;Acc:MGI:1888712]	5	14.1842	2.55878e-05	0.0080005	0.07848	1.3074
ENSMUSG00000042631	Xkr7	X-linked Kx blood group related 7 [Source:MGI Symbol;Acc:MGI:3526711]	2	-7.53911	2.57076e-05	0.0080005	2.02731	0.255836
ENSMUSG00000010311	Optc	opticin [Source:MGI Symbol;Acc:MGI:2151113]	1	4.10305	2.62686e-05	0.0080005	24.2565	99.564
ENSMUSG00000032446	Eomes	eomesodermin [Source:MGI Symbol;Acc:MGI:1201683]	9	-15.3745	2.70126e-05	0.0080005	0.362689	0.0174927
ENSMUSG00000075478	Slitrk1	SLIT and NTRK-like family, member 1 [Source:MGI Symbol;Acc:MGI:2679446]	14	-13.5996	2.71499e-05	0.0080005	0.558609	0.0376473
ENSMUSG00000030921	Trim30a	tripartite motif-containing 30A [Source:MGI Symbol;Acc:MGI:98178]	7	4.60982	2.76972e-05	0.00801064	0.381221	1.7697
ENSMUSG00000022148	Fyb	FYN binding protein [Source:MGI Symbol;Acc:MGI:1346327]	15	6.15956	3.11483e-05	0.00876214	0.192794	1.2076
ENSMUSG00000020695	Mrc2	mannose receptor, C type 2 [Source:MGI Symbol;Acc:MGI:107818]	11	2.41534	3.14176e-05	0.00876214	1.94178	4.69581
ENSMUSG00000006369	Fbln1	fibulin 1 [Source:MGI Symbol;Acc:MGI:95487]	15	3.17646	3.30684e-05	0.00906075	30.9422	98.3033
ENSMUSG00000036907	C1ql2	complement component 1, q subcomponent-like 2 [Source:MGI Symbol;Acc:MGI:3032521]	1	-7.07525	3.41693e-05	0.00920097	4.93923	0.678564
ENSMUSG00000087301	Gm13629	predicted gene 13629 [Source:MGI Symbol;Acc:MGI:3650683]	2	-10.8843	3.52526e-05	0.00933178	1.53114	0.124196
ENSMUSG00000039323	Igfbp2	insulin-like growth factor binding protein 2 [Source:MGI Symbol;Acc:MGI:96437]	1	3.13599	4.25203e-05	0.0109882	2.86298	8.9814
ENSMUSG00000045573	Penk	preproenkephalin [Source:MGI Symbol;Acc:MGI:104629]	4	2.5203	4.29173e-05	0.0109882	112.991	284.788
ENSMUSG00000060586	H2-Eb1	histocompatibility 2, class II antigen E beta [Source:MGI Symbol;Acc:MGI:95901]	17	7.50257	4.8982e-05	0.0123387	0.873327	6.62816
ENSMUSG00000005917	Otx1	orthodenticle homeobox 1 [Source:MGI Symbol;Acc:MGI:97450]	11	4.61194	5.15161e-05	0.0127617	0.363523	1.69916
ENSMUSG00000026579	F5	coagulation factor V [Source:MGI Symbol;Acc:MGI:88382]	1	3.45582	5.22953e-05	0.0127617	6.21437	21.4861
ENSMUSG00000049130	C5ar1	complement component 5a receptor 1 [Source:MGI Symbol;Acc:MGI:88232]	7	8.42284	5.56475e-05	0.0133708	0.0959462	0.827811
ENSMUSG00000046694	Tent5b	terminal nucleotidyltransferase 5B [Source:MGI Symbol;Acc:MGI:2140500]	4	2.43842	5.82385e-05	0.0137814	3.56459	8.68494
ENSMUSG00000053214	Gm9899	predicted gene 9899 [Source:MGI Symbol;Acc:MGI:3708711]	5	-6.25061	6.65133e-05	0.0154615	0.433111	0.065477
ENSMUSG00000027204	Fbn1	fibrillin 1 [Source:MGI Symbol;Acc:MGI:95489]	2	3.66785	6.73184e-05	0.0154615	8.27018	30.3414
ENSMUSG00000023915	Tnfrsf21	tumor necrosis factor receptor superfamily, member 21 [Source:MGI Symbol;Acc:MGI:2151075]	17	2.30234	7.83178e-05	0.0176663	7.00825	16.1459
ENSMUSG00000084939	Gm830	predicted gene 830 [Source:MGI Symbol;Acc:MGI:2685676]	4	13.5422	7.91805e-05	0.0176663	0.033956	0.502195
ENSMUSG00000004105	Angptl2	angiopoietin-like 2 [Source:MGI Symbol;Acc:MGI:1347002]	2	2.88631	9.03405e-05	0.0196331	1.27235	3.66859
ENSMUSG00000051527	Usp29	ubiquitin specific peptidase 29 [Source:MGI Symbol;Acc:MGI:1888998]	7	-3.70275	9.24815e-05	0.0196331	0.824261	0.220262
ENSMUSG00000072591	Fzd10os	frizzled class receptor 10, opposite strand [Source:MGI Symbol;Acc:MGI:2442398]	5	-10.3833	9.26903e-05	0.0196331	0.406671	0.0348702
ENSMUSG00000037321	Tap1	transporter 1, ATP-binding cassette, sub-family B (MDR/TAP) [Source:MGI Symbol;Acc:MGI:98483]	17	2.61574	9.30238e-05	0.0196331	1.64689	4.31041
ENSMUSG00000029843	Slc13a4	solute carrier family 13 (sodium/sulfate symporters), member 4 [Source:MGI Symbol;Acc:MGI:2442367]	6	2.7984	9.63359e-05	0.020061	3.38716	9.49676
ENSMUSG00000060988	Galnt13	polypeptide N-acetylgalactosaminyltransferase 13 [Source:MGI Symbol;Acc:MGI:2139447]	2	-4.25436	0.000109181	0.0222064	2.75618	0.641621
ENSMUSG00000042604	Kcna4	potassium voltage-gated channel, shaker-related subfamily, member 4 [Source:MGI Symbol;Acc:MGI:96661]	2	-5.6476	0.000110772	0.0222064	1.23917	0.215781
ENSMUSG00000052688	Rab7b	RAB7B, member RAS oncogene family [Source:MGI Symbol;Acc:MGI:2442295]	1	-4.78742	0.000110938	0.0222064	4.88115	1.01214
ENSMUSG00000070866	Zfp804a	zinc finger protein 804A [Source:MGI Symbol;Acc:MGI:2442949]	2	-6.31986	0.000112326	0.0222064	2.41692	0.374233
ENSMUSG00000028864	Hgf	hepatocyte growth factor [Source:MGI Symbol;Acc:MGI:96079]	5	-11.4546	0.000114842	0.0224199	0.298577	0.0232124
ENSMUSG00000079363	Gbp4	guanylate binding protein 4 [Source:MGI Symbol;Acc:MGI:97072]	5	5.19954	0.000121311	0.0233905	0.17452	0.923607
ENSMUSG00000089809	Rasgef1b	RasGEF domain family, member 1B [Source:MGI Symbol;Acc:MGI:2443755]	5	-2.0735	0.000127644	0.024268	3.33236	1.60363
ENSMUSG00000044317	Gpr4	G protein-coupled receptor 4 [Source:MGI Symbol;Acc:MGI:2441992]	7	9.6761	0.00012897	0.024268	0.0597097	0.624292
ENSMUSG00000039497	Dse	dermatan sulfate epimerase [Source:MGI Symbol;Acc:MGI:2443455]	10	2.42868	0.000135858	0.0252599	2.23755	5.42395
ENSMUSG00000036800	Fam135b	family with sequence similarity 135, member B [Source:MGI Symbol;Acc:MGI:1917613]	15	-4.39977	0.000140122	0.0256765	1.41451	0.318767
ENSMUSG00000025492	Ifitm3	interferon induced transmembrane protein 3 [Source:MGI Symbol;Acc:MGI:1913391]	7	2.38477	0.000141387	0.0256765	13.1546	31.3205
ENSMUSG00000029298	Gbp9	guanylate-binding protein 9 [Source:MGI Symbol;Acc:MGI:3605620]	5	3.52486	0.000145113	0.0258726	0.512082	1.80969
ENSMUSG00000021478	Drd1	dopamine receptor D1 [Source:MGI Symbol;Acc:MGI:99578]	13	-4.13529	0.000147391	0.0258726	2.05364	0.484897
ENSMUSG00000026413	Pkp1	plakophilin 1 [Source:MGI Symbol;Acc:MGI:1328359]	1	-6.62442	0.000147436	0.0258726	0.732316	0.110565
ENSMUSG00000073418	C4b	complement component 4B (Chido blood group) [Source:MGI Symbol;Acc:MGI:88228]	17	2.23745	0.000152792	0.0265144	3.48399	7.80188
ENSMUSG00000002020	Ltbp2	latent transforming growth factor beta binding protein 2 [Source:MGI Symbol;Acc:MGI:99502]	12	3.29503	0.000157346	0.0270047	6.5401	21.5609
ENSMUSG00000002111	Spi1	spleen focus forming virus (SFFV) proviral integration oncogene [Source:MGI Symbol;Acc:MGI:98282]	2	7.24722	0.00015921	0.0270276	0.125012	0.91782
ENSMUSG00000024610	Cd74	CD74 antigen (invariant polypeptide of major histocompatibility complex, class II antigen-associated) [Source:MGI Symbol;Acc:MGI:96534]	18	5.02305	0.000164364	0.0273432	4.77273	24.0429
ENSMUSG00000021614	Vcan	versican [Source:MGI Symbol;Acc:MGI:102889]	13	3.02668	0.00016457	0.0273432	4.7652	14.4277
ENSMUSG00000001435	Col18a1	collagen, type XVIII, alpha 1 [Source:MGI Symbol;Acc:MGI:88451]	10	3.39745	0.000170138	0.0278526	21.0878	71.6575
ENSMUSG00000068758	Il3ra	interleukin 3 receptor, alpha chain [Source:MGI Symbol;Acc:MGI:96553]	14	4.40855	0.000171203	0.0278526	0.712543	3.16809
ENSMUSG00000027347	Rasgrp1	RAS guanyl releasing protein 1 [Source:MGI Symbol;Acc:MGI:1314635]	2	-5.07124	0.000175204	0.0282097	0.700393	0.136082
ENSMUSG00000061527	Krt5	keratin 5 [Source:MGI Symbol;Acc:MGI:96702]	15	-21.8102	0.000184337	0.0289265	14.0641	0.642826
ENSMUSG00000106411	Gm42445	predicted gene 42445 [Source:MGI Symbol;Acc:MGI:5662582]	5	-5.89901	0.000186159	0.0289265	0.808881	0.128131
ENSMUSG00000027536	Chmp4c	charged multivesicular body protein 4C [Source:MGI Symbol;Acc:MGI:1913621]	3	2.89173	0.000186727	0.0289265	0.868985	2.51022
ENSMUSG00000007097	Atp1a2	ATPase, Na+/K+ transporting, alpha 2 polypeptide [Source:MGI Symbol;Acc:MGI:88106]	1	3.08921	0.000187065	0.0289265	38.0719	117.625
ENSMUSG00000042549	Map2k3os	mitogen-activated protein kinase kinase 3, opposite strand [Source:MGI Symbol;Acc:MGI:1344334]	11	-5.01252	0.000188928	0.0289283	4.04251	0.773519
ENSMUSG00000040253	Gbp7	guanylate binding protein 7 [Source:MGI Symbol;Acc:MGI:2444421]	3	3.03453	0.000218997	0.0332067	0.687616	2.09968
ENSMUSG00000051341	Zfp52	zinc finger protein 52 [Source:MGI Symbol;Acc:MGI:99199]	17	2.9398	0.000244773	0.0367583	2.04568	5.99896
ENSMUSG00000041827	Oasl1	2'-5' oligoadenylate synthetase-like 1 [Source:MGI Symbol;Acc:MGI:2180849]	5	5.35238	0.000248676	0.0369888	0.333271	1.82459
ENSMUSG00000022829	Stxbp5l	syntaxin binding protein 5-like [Source:MGI Symbol;Acc:MGI:2443815]	16	-3.06728	0.000252191	0.0371578	4.13852	1.34351
ENSMUSG00000109416	Gm44863	predicted gene 44863 [Source:MGI Symbol;Acc:MGI:5753439]	7	-9.85444	0.000255916	0.0373541	1.05961	0.0851879
ENSMUSG00000024827	Gldc	glycine decarboxylase [Source:MGI Symbol;Acc:MGI:1341155]	19	2.05659	0.000258546	0.0373886	6.01179	12.3771
ENSMUSG00000064193	Gm4735	predicted gene 4735 [Source:MGI Symbol;Acc:MGI:3645521]	2	-20.9446	0.000273799	0.0392311	15.7527	0.744712
ENSMUSG00000057455	Rit2	Ras-like without CAAX 2 [Source:MGI Symbol;Acc:MGI:108054]	18	-6.6552	0.000298575	0.0423923	3.5112	0.517101
ENSMUSG00000019803	Nr2e1	nuclear receptor subfamily 2, group E, member 1 [Source:MGI Symbol;Acc:MGI:1100526]	10	-9.8579	0.000302733	0.0425908	1.09949	0.105247
ENSMUSG00000090084	Srpx	sushi-repeat-containing protein [Source:MGI Symbol;Acc:MGI:1858306]	X	-7.45853	0.000305428	0.0425908	1.37399	0.183903
ENSMUSG00000102752	Gm7694	predicted gene 7694 [Source:MGI Symbol;Acc:MGI:3649135]	1	1.92649	0.000317137	0.0438323	6.33814	12.2216
ENSMUSG00000018507	Trpv2	transient receptor potential cation channel, subfamily V, member 2 [Source:MGI Symbol;Acc:MGI:1341836]	11	-9.29878	0.000337082	0.0461803	0.261347	0.0216075
ENSMUSG00000055865	Tafa3	TAFA chemokine like family member 3 [Source:MGI Symbol;Acc:MGI:3046463]	3	-3.28919	0.000350059	0.0475411	4.43441	1.33965
ENSMUSG00000049502	Dtx3l	deltex 3-like, E3 ubiquitin ligase [Source:MGI Symbol;Acc:MGI:2656973]	16	2.78679	0.000361889	0.048724	2.18493	6.0843
ENSMUSG00000042451	Mybph	myosin binding protein H [Source:MGI Symbol;Acc:MGI:1858196]	1	4.74687	0.000379829	0.0507022	0.400107	1.90821
ENSMUSG00000021806	Nid2	nidogen 2 [Source:MGI Symbol;Acc:MGI:1298229]	14	3.52366	0.000413886	0.0543336	1.54671	5.47021
ENSMUSG00000062591	Tubb4a	tubulin, beta 4A class IVA [Source:MGI Symbol;Acc:MGI:107848]	17	-3.04769	0.000413991	0.0543336	18.2207	5.95106
ENSMUSG00000037259	Dzank1	double zinc ribbon and ankyrin repeat domains 1 [Source:MGI Symbol;Acc:MGI:2139080]	2	-2.77572	0.000418434	0.0544592	3.75998	1.35035
ENSMUSG00000041741	Pde3a	phosphodiesterase 3A, cGMP inhibited [Source:MGI Symbol;Acc:MGI:1860764]	6	-4.36139	0.000423766	0.0545353	2.89457	0.660511
ENSMUSG00000028037	Ifi44	interferon-induced protein 44 [Source:MGI Symbol;Acc:MGI:2443016]	3	8.24805	0.000426003	0.0545353	0.0486907	0.416407
ENSMUSG00000038457	Tmem255b	transmembrane protein 255B [Source:MGI Symbol;Acc:MGI:2685533]	8	-3.18447	0.000448524	0.0569516	8.04448	2.51676
ENSMUSG00000039904	Gpr37	G protein-coupled receptor 37 [Source:MGI Symbol;Acc:MGI:1313297]	6	-3.98616	0.000456166	0.0574549	9.14827	2.28656
ENSMUSG00000078234	Klhdc7a	kelch domain containing 7A [Source:MGI Symbol;Acc:MGI:2444612]	4	3.43581	0.000492743	0.0615505	0.514873	1.78046
ENSMUSG00000020651	Slc26a4	solute carrier family 26, member 4 [Source:MGI Symbol;Acc:MGI:1346029]	12	3.87969	0.000496565	0.0615505	5.09051	19.7789
ENSMUSG00000031383	Dusp9	dual specificity phosphatase 9 [Source:MGI Symbol;Acc:MGI:2387107]	X	-7.59291	0.000530878	0.0652854	0.449313	0.0523795
ENSMUSG00000056222	Spock1	sparc/osteonectin, cwcv and kazal-like domains proteoglycan 1 [Source:MGI Symbol;Acc:MGI:105371]	13	1.78292	0.000539792	0.0653725	7.8208	13.9463
ENSMUSG00000041559	Fmod	fibromodulin [Source:MGI Symbol;Acc:MGI:1328364]	1	1.79287	0.000539957	0.0653725	19.4238	34.8127
ENSMUSG00000040489	Sox30	SRY (sex determining region Y)-box 30 [Source:MGI Symbol;Acc:MGI:1341157]	11	-5.72732	0.00054522	0.0655018	3.08501	0.530401
ENSMUSG00000072941	Sod3	superoxide dismutase 3, extracellular [Source:MGI Symbol;Acc:MGI:103181]	5	3.05284	0.000595932	0.0710478	8.73019	26.6657
ENSMUSG00000094832	Gm21846	predicted gene, 21846 [Source:MGI Symbol;Acc:MGI:5434010]	5	-4.19567	0.000619126	0.072599	2.5271	0.587763
ENSMUSG00000029130	Rnf32	ring finger protein 32 [Source:MGI Symbol;Acc:MGI:1861747]	5	-3.86848	0.000624728	0.072599	0.985401	0.252968
ENSMUSG00000026837	Col5a1	collagen, type V, alpha 1 [Source:MGI Symbol;Acc:MGI:88457]	2	2.06439	0.000626815	0.072599	3.51595	7.26859
ENSMUSG00000058297	Spock2	sparc/osteonectin, cwcv and kazal-like domains proteoglycan 2 [Source:MGI Symbol;Acc:MGI:1891351]	10	-2.67994	0.000627537	0.072599	23.2169	8.65459
ENSMUSG00000021367	Edn1	endothelin 1 [Source:MGI Symbol;Acc:MGI:95283]	13	3.70056	0.000642985	0.0737423	1.95873	7.25257
ENSMUSG00000035200	Chrnb4	cholinergic receptor, nicotinic, beta polypeptide 4 [Source:MGI Symbol;Acc:MGI:87892]	9	2.57081	0.000646862	0.0737423	1.20235	3.10206
ENSMUSG00000040483	Xaf1	XIAP associated factor 1 [Source:MGI Symbol;Acc:MGI:3772572]	11	2.59473	0.00065191	0.0737792	1.02861	2.67344
ENSMUSG00000042532	Golga7b	golgi autoantigen, golgin subfamily a, 7B [Source:MGI Symbol;Acc:MGI:1918396]	19	-8.1621	0.000678542	0.0762407	0.925384	0.100887
ENSMUSG00000038415	Foxq1	forkhead box Q1 [Source:MGI Symbol;Acc:MGI:1298228]	13	-5.72337	0.000685058	0.0764232	0.908599	0.160171
ENSMUSG00000117842	Gm41793	predicted gene, 41793 [Source:MGI Symbol;Acc:MGI:5624678]	18	-15.4199	0.00071748	0.0794724	4.04212	0.227221
ENSMUSG00000009281	Rarres2	retinoic acid receptor responder (tazarotene induced) 2 [Source:MGI Symbol;Acc:MGI:1918910]	6	3.2629	0.000723724	0.0795995	1.93658	6.33796
ENSMUSG00000070327	Rnf213	ring finger protein 213 [Source:MGI Symbol;Acc:MGI:1289196]	11	2.0397	0.000744484	0.0813101	4.97923	10.1585
ENSMUSG00000105485	Gm42447	predicted gene 42447 [Source:MGI Symbol;Acc:MGI:5662584]	5	-5.9492	0.00075223	0.0815856	0.783835	0.120304
ENSMUSG00000029561	Oasl2	2'-5' oligoadenylate synthetase-like 2 [Source:MGI Symbol;Acc:MGI:1344390]	5	2.72541	0.000793963	0.0855181	0.523462	1.43385
ENSMUSG00000017314	Mpp2	membrane protein, palmitoylated 2 (MAGUK p55 subfamily member 2) [Source:MGI Symbol;Acc:MGI:1858257]	11	-2.09016	0.000809006	0.0865415	8.23125	3.92924
ENSMUSG00000109418	Gm44800	predicted gene 44800 [Source:MGI Symbol;Acc:MGI:5753376]	8	-6.25023	0.000844948	0.0897699	2.31575	0.35386
ENSMUSG00000057897	Camk2b	calcium/calmodulin-dependent protein kinase II, beta [Source:MGI Symbol;Acc:MGI:88257]	11	-2.97004	0.000853833	0.0897699	3.73169	1.251
ENSMUSG00000106476	Rpl36-ps9	ribosomal protein L36, pseudogene 9 [Source:MGI Symbol;Acc:MGI:3643602]	5	-5.39951	0.00085643	0.0897699	9.91214	1.74979
ENSMUSG00000109257	Gm45200	predicted gene 45200 [Source:MGI Symbol;Acc:MGI:5753776]	7	-9.08987	0.000874197	0.0910214	2.56196	0.24893
ENSMUSG00000037656	Slc20a2	solute carrier family 20, member 2 [Source:MGI Symbol;Acc:MGI:97851]	8	1.75702	0.000888086	0.0918551	7.76991	13.6556
ENSMUSG00000024112	Cacna1h	calcium channel, voltage-dependent, T type, alpha 1H subunit [Source:MGI Symbol;Acc:MGI:1928842]	17	-2.18806	0.000932342	0.0957982	8.40254	3.83873
ENSMUSG00000036103	Colec12	collectin sub-family member 12 [Source:MGI Symbol;Acc:MGI:2152907]	18	1.97671	0.00094395	0.0963569	1.51225	2.99522
ENSMUSG00000027004	Frzb	frizzled-related protein [Source:MGI Symbol;Acc:MGI:892032]	2	-5.75665	0.000966145	0.0979822	1.55608	0.264729
ENSMUSG00000074896	Ifit3	interferon-induced protein with tetratricopeptide repeats 3 [Source:MGI Symbol;Acc:MGI:1101055]	19	3.10303	0.000985302	0.0985279	6.32787	19.6116
ENSMUSG00000034422	Parp14	poly (ADP-ribose) polymerase family, member 14 [Source:MGI Symbol;Acc:MGI:1919489]	16	3.20152	0.000985304	0.0985279	1.25357	4.01105
ENSMUSG00000102257	Gm37649	predicted gene, 37649 [Source:MGI Symbol;Acc:MGI:5610877]	9	-3.22403	0.000990452	0.0985279	2.31682	0.719621
ENSMUSG00000022208	Jph4	junctophilin 4 [Source:MGI Symbol;Acc:MGI:2443113]	14	-3.04778	0.00100995	0.0998319	1.30479	0.423827
ENSMUSG00000020641	Rsad2	radical S-adenosyl methionine domain containing 2 [Source:MGI Symbol;Acc:MGI:1929628]	12	5.20397	0.00103199	0.101369	0.880415	4.59047
ENSMUSG00000030380	Mzf1	myeloid zinc finger 1 [Source:MGI Symbol;Acc:MGI:107457]	7	-3.42667	0.00103943	0.101462	0.677441	0.193837
ENSMUSG00000047793	Sned1	sushi, nidogen and EGF-like domains 1 [Source:MGI Symbol;Acc:MGI:3045960]	1	2.53867	0.00106947	0.103613	20.0698	50.9615
ENSMUSG00000019990	Pde7b	phosphodiesterase 7B [Source:MGI Symbol;Acc:MGI:1352752]	10	-3.9828	0.00107474	0.103613	0.523791	0.129471
ENSMUSG00000028137	Celf3	CUGBP, Elav-like family member 3 [Source:MGI Symbol;Acc:MGI:1926034]	3	-3.67642	0.00110238	0.105625	8.57172	2.32423
ENSMUSG00000029544	Cabp1	calcium binding protein 1 [Source:MGI Symbol;Acc:MGI:1352750]	5	-3.28296	0.00111882	0.106486	8.07876	2.45301
ENSMUSG00000034762	Glis1	GLIS family zinc finger 1 [Source:MGI Symbol;Acc:MGI:2386723]	4	-3.76197	0.001125	0.106486	1.7167	0.45671
ENSMUSG00000035208	Slfn8	schlafen 8 [Source:MGI Symbol;Acc:MGI:2672859]	11	3.5244	0.00114577	0.107799	0.493439	1.74906
ENSMUSG00000006611	Hfe	homeostatic iron regulator [Source:MGI Symbol;Acc:MGI:109191]	13	2.07209	0.0011539	0.107914	6.12786	12.7064
ENSMUSG00000027555	Car13	carbonic anhydrase 13 [Source:MGI Symbol;Acc:MGI:1931322]	3	4.55814	0.00118658	0.110309	0.298568	1.36732
ENSMUSG00000028931	Kcnab2	potassium voltage-gated channel, shaker-related subfamily, beta member 2 [Source:MGI Symbol;Acc:MGI:109239]	4	-2.36275	0.0012003	0.110925	12.0102	5.07633
ENSMUSG00000037593	Rskr	ribosomal protein S6 kinase related [Source:MGI Symbol;Acc:MGI:2652869]	11	-2.73904	0.0012302	0.112862	4.09157	1.484
ENSMUSG00000022456	Septin3	septin 3 [Source:MGI Symbol;Acc:MGI:1345148]	15	-3.3572	0.00123571	0.112862	3.29025	0.97521
ENSMUSG00000024030	Abcg1	ATP binding cassette subfamily G member 1 [Source:MGI Symbol;Acc:MGI:107704]	17	-2.18249	0.0012538	0.113848	7.4914	3.42663
ENSMUSG00000040867	Begain	brain-enriched guanylate kinase-associated [Source:MGI Symbol;Acc:MGI:3044626]	12	-3.01779	0.00127405	0.115018	5.41874	1.78662
ENSMUSG00000075463	4930594M22Rik	RIKEN cDNA 4930594M22 gene [Source:MGI Symbol;Acc:MGI:1925478]	14	2.22714	0.0013158	0.118058	2.20043	4.9045
ENSMUSG00000045903	Npas4	neuronal PAS domain protein 4 [Source:MGI Symbol;Acc:MGI:2664186]	19	-4.61756	0.00132284	0.118058	1.17292	0.24471
ENSMUSG00000063268	Parp10	poly (ADP-ribose) polymerase family, member 10 [Source:MGI Symbol;Acc:MGI:3712326]	15	2.75922	0.00140768	0.123366	0.822347	2.27737
ENSMUSG00000068876	Cgn	cingulin [Source:MGI Symbol;Acc:MGI:1927237]	3	2.17412	0.00140938	0.123366	8.22295	17.8948
ENSMUSG00000002985	Apoe	apolipoprotein E [Source:MGI Symbol;Acc:MGI:88057]	7	2.2198	0.00141396	0.123366	333.329	739.949
ENSMUSG00000026959	Grin1	glutamate receptor, ionotropic, NMDA1 (zeta 1) [Source:MGI Symbol;Acc:MGI:95819]	2	-3.49666	0.00141485	0.123366	3.95329	1.12525
ENSMUSG00000031840	Rab3a	RAB3A, member RAS oncogene family [Source:MGI Symbol;Acc:MGI:97843]	8	-2.58915	0.00142601	0.123366	24.5287	9.44972
ENSMUSG00000024518	Rax	retina and anterior neural fold homeobox [Source:MGI Symbol;Acc:MGI:109632]	18	-1.98997	0.00142971	0.123366	10.2853	5.16667
ENSMUSG00000093553	Gm20633	predicted gene 20633 [Source:MGI Symbol;Acc:MGI:5313080]	3	-4.09813	0.00144656	0.123929	0.874197	0.213298
ENSMUSG00000058145	Adamts17	a disintegrin-like and metallopeptidase (reprolysin type) with thrombospondin type 1 motif, 17 [Source:MGI Symbol;Acc:MGI:3588195]	7	2.42705	0.0014521	0.123929	0.585703	1.42589
ENSMUSG00000033192	Lpcat2	lysophosphatidylcholine acyltransferase 2 [Source:MGI Symbol;Acc:MGI:3606214]	8	-1.90374	0.00148351	0.125921	8.2813	4.33553
ENSMUSG00000055254	Ntrk2	neurotrophic tyrosine kinase, receptor, type 2 [Source:MGI Symbol;Acc:MGI:97384]	13	2.22797	0.0015067	0.127198	2.85299	6.35887
ENSMUSG00000074817	Papolb	poly (A) polymerase beta (testis specific) [Source:MGI Symbol;Acc:MGI:1932115]	5	-5.14541	0.00153288	0.128269	0.762804	0.146661
ENSMUSG00000033060	Lmo7	LIM domain only 7 [Source:MGI Symbol;Acc:MGI:1353586]	14	2.01491	0.00153581	0.128269	2.84759	5.73123
ENSMUSG00000021647	Cartpt	CART prepropeptide [Source:MGI Symbol;Acc:MGI:1351330]	13	-5.67254	0.00155507	0.129186	7.91383	1.36411
ENSMUSG00000040797	Iqsec3	IQ motif and Sec7 domain 3 [Source:MGI Symbol;Acc:MGI:2677208]	6	-3.44652	0.00157456	0.130114	8.32406	2.4113
ENSMUSG00000030428	Ttyh1	tweety family member 1 [Source:MGI Symbol;Acc:MGI:1889007]	7	-2.73874	0.00159173	0.130603	15.2974	5.57683
ENSMUSG00000022900	Ildr1	immunoglobulin-like domain containing receptor 1 [Source:MGI Symbol;Acc:MGI:2146574]	16	6.83153	0.00159721	0.130603	0.0514537	0.353598
ENSMUSG00000104318	Pcdha7	protocadherin alpha 7 [Source:MGI Symbol;Acc:MGI:1298369]	18	-7.0438	0.0016211	0.130981	0.346844	0.0428643
ENSMUSG00000031015	Swap70	SWA-70 protein [Source:MGI Symbol;Acc:MGI:1298390]	7	1.93925	0.00162508	0.130981	1.36999	2.65322
ENSMUSG00000058831	Opn1sw	opsin 1 (cone pigments), short-wave-sensitive (color blindness, tritan) [Source:MGI Symbol;Acc:MGI:99438]	6	-3.82592	0.0016376	0.130981	37.0056	9.65482
ENSMUSG00000027386	Fbln7	fibulin 7 [Source:MGI Symbol;Acc:MGI:1917620]	2	2.0029	0.0016413	0.130981	2.88631	5.79867
ENSMUSG00000028581	Laptm5	lysosomal-associated protein transmembrane 5 [Source:MGI Symbol;Acc:MGI:108046]	4	2.96053	0.00164377	0.130981	0.553573	1.64931
ENSMUSG00000038418	Egr1	early growth response 1 [Source:MGI Symbol;Acc:MGI:95295]	18	2.2958	0.00166922	0.132243	355.538	816.259
ENSMUSG00000056418	BC043934	cDNA sequence BC043934 [Source:MGI Symbol;Acc:MGI:2679715]	9	4.42049	0.00167654	0.132243	0.766474	3.42611
ENSMUSG00000006651	Aplp1	amyloid beta (A4) precursor-like protein 1 [Source:MGI Symbol;Acc:MGI:88046]	7	-2.10998	0.0016991	0.13335	34.8595	16.5027
ENSMUSG00000072620	Slfn2	schlafen 2 [Source:MGI Symbol;Acc:MGI:1313258]	11	3.80567	0.00171356	0.133419	1.47982	5.61452
ENSMUSG00000097823	Gm16701	predicted gene, 16701 [Source:MGI Symbol;Acc:MGI:4439625]	1	-3.87275	0.00171707	0.133419	2.47686	0.623879
ENSMUSG00000000126	Wnt9a	wingless-type MMTV integration site family, member 9A [Source:MGI Symbol;Acc:MGI:2446084]	11	2.81755	0.00174642	0.135028	0.633222	1.79074
ENSMUSG00000027792	Bche	butyrylcholinesterase [Source:MGI Symbol;Acc:MGI:894278]	3	2.11498	0.00177144	0.136178	2.14727	4.54036
ENSMUSG00000026468	Lhx4	LIM homeobox protein 4 [Source:MGI Symbol;Acc:MGI:101776]	1	-4.3909	0.00178086	0.136178	2.49149	0.560296
ENSMUSG00000031971	Ccsap	centriole, cilia and spindle associated protein [Source:MGI Symbol;Acc:MGI:1920670]	8	-3.0904	0.00180318	0.136178	6.15887	1.97511
ENSMUSG00000039252	Lgi2	leucine-rich repeat LGI family, member 2 [Source:MGI Symbol;Acc:MGI:2180196]	5	1.88777	0.00180559	0.136178	2.3445	4.42581
ENSMUSG00000043301	Kcnj6	potassium inwardly-rectifying channel, subfamily J, member 6 [Source:MGI Symbol;Acc:MGI:104781]	16	-4.38945	0.00181818	0.136178	0.639233	0.143265
ENSMUSG00000038507	Parp12	poly (ADP-ribose) polymerase family, member 12 [Source:MGI Symbol;Acc:MGI:2143990]	6	2.08149	0.00181877	0.136178	3.72306	7.7514
ENSMUSG00000063564	Col23a1	collagen, type XXIII, alpha 1 [Source:MGI Symbol;Acc:MGI:2653243]	11	2.10834	0.00182233	0.136178	10.9233	23.0392
ENSMUSG00000025402	Nab2	Ngfi-A binding protein 2 [Source:MGI Symbol;Acc:MGI:107563]	10	-3.33933	0.00184203	0.136995	13.3563	4.00758
ENSMUSG00000025270	Alas2	aminolevulinic acid synthase 2, erythroid [Source:MGI Symbol;Acc:MGI:87990]	X	2.56457	0.0018553	0.137327	5.35695	13.7512
ENSMUSG00000015957	Wnt11	wingless-type MMTV integration site family, member 11 [Source:MGI Symbol;Acc:MGI:101948]	7	-3.09655	0.00188299	0.138719	1.78122	0.581668
ENSMUSG00000073411	H2-D1	histocompatibility 2, D region locus 1 [Source:MGI Symbol;Acc:MGI:95896]	17	1.76529	0.0019022	0.139477	24.4878	43.2491
ENSMUSG00000025353	Ormdl2	ORM1-like 2 (S. cerevisiae) [Source:MGI Symbol;Acc:MGI:1914094]	10	2.55249	0.00191658	0.139875	1.79768	4.62002
ENSMUSG00000048385	Scrt1	scratch family zinc finger 1 [Source:MGI Symbol;Acc:MGI:2176606]	15	-3.57091	0.00194448	0.141228	4.59311	1.27642
ENSMUSG00000056596	Trnp1	TMF1-regulated nuclear protein 1 [Source:MGI Symbol;Acc:MGI:1916789]	4	-2.88426	0.00195322	0.141228	32.6915	11.3078
ENSMUSG00000021638	Ocln	occludin [Source:MGI Symbol;Acc:MGI:106183]	13	2.50675	0.00197199	0.141929	0.785991	1.96757
ENSMUSG00000057751	Megf6	multiple EGF-like-domains 6 [Source:MGI Symbol;Acc:MGI:1919351]	4	2.30714	0.00202232	0.143795	1.2319	2.84171
ENSMUSG00000015476	Prrt1	proline-rich transmembrane protein 1 [Source:MGI Symbol;Acc:MGI:1932118]	17	-2.44589	0.00202491	0.143795	7.69205	3.12487
ENSMUSG00000033355	Rtp4	receptor transporter protein 4 [Source:MGI Symbol;Acc:MGI:1915025]	16	3.80435	0.00202554	0.143795	0.461784	1.75983
ENSMUSG00000026826	Nr4a2	nuclear receptor subfamily 4, group A, member 2 [Source:MGI Symbol;Acc:MGI:1352456]	2	-2.61913	0.00203896	0.144093	1.79109	0.677747
ENSMUSG00000007030	Vwa7	von Willebrand factor A domain containing 7 [Source:MGI Symbol;Acc:MGI:1306798]	17	2.48563	0.00206932	0.145579	1.19851	2.98601
ENSMUSG00000049357	Brd8dc	BRD8 domain containing [Source:MGI Symbol;Acc:MGI:3045347]	18	-4.51499	0.00208921	0.145755	1.65696	0.356741
ENSMUSG00000110869	Gm49628	predicted gene, 49628 [Source:MGI Symbol;Acc:MGI:6215053]	10	-6.42168	0.00211258	0.145755	1.26038	0.180385
ENSMUSG00000073421	H2-Ab1	histocompatibility 2, class II antigen A, beta 1 [Source:MGI Symbol;Acc:MGI:103070]	17	6.24989	0.00212456	0.145755	0.88412	5.57688
ENSMUSG00000027611	Procr	protein C receptor, endothelial [Source:MGI Symbol;Acc:MGI:104596]	2	4.56803	0.00213329	0.145755	0.454215	2.08626
ENSMUSG00000053835	H2-T24	histocompatibility 2, T region locus 24 [Source:MGI Symbol;Acc:MGI:95958]	17	4.74691	0.00213777	0.145755	0.172838	0.859025
ENSMUSG00000027684	Mecom	MDS1 and EVI1 complex locus [Source:MGI Symbol;Acc:MGI:95457]	3	2.90847	0.0021496	0.145755	0.373847	1.0924
ENSMUSG00000042453	Reln	reelin [Source:MGI Symbol;Acc:MGI:103022]	5	2.44075	0.00215056	0.145755	8.69152	21.216
ENSMUSG00000039672	Kcne2	potassium voltage-gated channel, Isk-related subfamily, gene 2 [Source:MGI Symbol;Acc:MGI:1891123]	16	-3.19565	0.00215963	0.145755	4.70606	1.44984
ENSMUSG00000028273	Pdlim5	PDZ and LIM domain 5 [Source:MGI Symbol;Acc:MGI:1927489]	3	1.74787	0.00216409	0.145755	4.96418	8.67004
ENSMUSG00000005649	Cabp5	calcium binding protein 5 [Source:MGI Symbol;Acc:MGI:1352746]	7	-3.4966	0.00216515	0.145755	9.59089	2.72211
ENSMUSG00000066842	Hmcn1	hemicentin 1 [Source:MGI Symbol;Acc:MGI:2685047]	1	2.07507	0.00219654	0.146707	0.922589	1.91588
ENSMUSG00000070337	Gpr179	G protein-coupled receptor 179 [Source:MGI Symbol;Acc:MGI:2443409]	11	-3.26288	0.00219808	0.146707	12.2219	3.74015
ENSMUSG00000035299	Mid1	midline 1 [Source:MGI Symbol;Acc:MGI:1100537]	X	2.24044	0.00221165	0.146985	6.65758	14.9131
ENSMUSG00000039194	Rlbp1	retinaldehyde binding protein 1 [Source:MGI Symbol;Acc:MGI:97930]	7	-2.65947	0.00223357	0.147813	28.1376	10.563
ENSMUSG00000017615	Tnfaip1	tumor necrosis factor, alpha-induced protein 1 (endothelial) [Source:MGI Symbol;Acc:MGI:104961]	11	1.8658	0.00226357	0.149166	4.64299	8.67064
ENSMUSG00000027977	Ndst3	N-deacetylase/N-sulfotransferase (heparan glucosaminyl) 3 [Source:MGI Symbol;Acc:MGI:1932544]	3	-4.29785	0.00229056	0.150311	0.899529	0.206679
ENSMUSG00000050538	B230217C12Rik	RIKEN cDNA B230217C12 gene [Source:MGI Symbol;Acc:MGI:1915377]	11	-4.30325	0.00231202	0.150944	2.63388	0.600701
ENSMUSG00000074384	AI429214	expressed sequence AI429214 [Source:MGI Symbol;Acc:MGI:2142538]	8	-3.6447	0.00231954	0.150944	2.07844	0.557696
ENSMUSG00000021678	F2rl1	coagulation factor II (thrombin) receptor-like 1 [Source:MGI Symbol;Acc:MGI:101910]	13	2.92303	0.00233224	0.151141	0.632591	1.85121
ENSMUSG00000063796	Slc22a8	solute carrier family 22 (organic anion transporter), member 8 [Source:MGI Symbol;Acc:MGI:1336187]	19	3.07043	0.00238129	0.152681	1.1586	3.5735
ENSMUSG00000087620	5330434G04Rik	RIKEN cDNA 5330434G04 gene [Source:MGI Symbol;Acc:MGI:1925519]	X	-2.11588	0.00238556	0.152681	1.75068	0.822661
ENSMUSG00000023011	Faim2	Fas apoptotic inhibitory molecule 2 [Source:MGI Symbol;Acc:MGI:1919643]	15	-3.55857	0.0023857	0.152681	2.93845	0.821453
ENSMUSG00000099759	1700030C10Rik	RIKEN cDNA 1700030C10 gene [Source:MGI Symbol;Acc:MGI:1916763]	12	-8.09884	0.0023951	0.152681	1.92875	0.225112
ENSMUSG00000020912	Krt12	keratin 12 [Source:MGI Symbol;Acc:MGI:96687]	11	-42.47	0.00241009	0.153012	33.7008	0.792647
ENSMUSG00000030170	Wnt5b	wingless-type MMTV integration site family, member 5B [Source:MGI Symbol;Acc:MGI:98959]	6	2.19834	0.0024251	0.153341	10.859	23.8712
ENSMUSG00000073514	Dok6	docking protein 6 [Source:MGI Symbol;Acc:MGI:3639495]	18	-2.93275	0.00244728	0.154119	0.726358	0.244247
ENSMUSG00000097413	A830052D11Rik	RIKEN cDNA A830052D11 gene [Source:MGI Symbol;Acc:MGI:3028074]	18	-7.44609	0.0024658	0.154662	1.01062	0.115506
ENSMUSG00000053420	Gm4792	predicted gene 4792 [Source:MGI Symbol;Acc:MGI:3648918]	10	-4.34503	0.00249427	0.155538	12.0382	2.71222
ENSMUSG00000038257	Glra3	glycine receptor, alpha 3 subunit [Source:MGI Symbol;Acc:MGI:95749]	8	-6.61983	0.00250462	0.155538	0.879273	0.128479
ENSMUSG00000073490	Ifi207	interferon activated gene 207 [Source:MGI Symbol;Acc:MGI:2138302]	1	3.58676	0.00250965	0.155538	0.240907	0.877261
ENSMUSG00000045648	Vwc2l	von Willebrand factor C domain-containing protein 2-like [Source:MGI Symbol;Acc:MGI:2444069]	1	-4.64644	0.00253437	0.156022	0.287513	0.0579388
ENSMUSG00000033080	Vsx1	visual system homeobox 1 [Source:MGI Symbol;Acc:MGI:1890816]	2	-3.69879	0.00253743	0.156022	1.35355	0.359119
ENSMUSG00000086822	5330413P13Rik	RIKEN cDNA 5330413P13 gene [Source:MGI Symbol;Acc:MGI:3041161]	2	-3.16464	0.00257159	0.156891	0.775457	0.239117
ENSMUSG00000050671	Ism2	isthmin 2 [Source:MGI Symbol;Acc:MGI:2685110]	12	3.7109	0.00258383	0.156891	0.792168	2.96555
ENSMUSG00000046805	Mpeg1	macrophage expressed gene 1 [Source:MGI Symbol;Acc:MGI:1333743]	19	3.28378	0.00258535	0.156891	0.418547	1.39242
ENSMUSG00000040987	Mill2	MHC I like leukocyte 2 [Source:MGI Symbol;Acc:MGI:2179989]	7	4.4168	0.00259483	0.156891	0.071765	0.327451
ENSMUSG00000112756	Gm48014	predicted gene, 48014 [Source:MGI Symbol;Acc:MGI:6097321]	12	3.10687	0.00262677	0.156891	1.71443	5.30876
ENSMUSG00000021848	Otx2	orthodenticle homeobox 2 [Source:MGI Symbol;Acc:MGI:97451]	14	-2.3917	0.00264068	0.156891	10.8487	4.5243
ENSMUSG00000025927	Tfap2b	transcription factor AP-2 beta [Source:MGI Symbol;Acc:MGI:104672]	1	-4.02936	0.00265596	0.156891	6.55152	1.61765
ENSMUSG00000031391	L1cam	L1 cell adhesion molecule [Source:MGI Symbol;Acc:MGI:96721]	X	-3.52886	0.00265852	0.156891	2.45308	0.68822
ENSMUSG00000102406	A730094K22Rik	RIKEN cDNA A730094K22 gene [Source:MGI Symbol;Acc:MGI:2442864]	9	5.49672	0.00266688	0.156891	0.469692	2.60617
ENSMUSG00000069227	Gprin1	G protein-regulated inducer of neurite outgrowth 1 [Source:MGI Symbol;Acc:MGI:1349455]	13	-3.65947	0.00266809	0.156891	5.64117	1.53151
ENSMUSG00000026822	Lcn2	lipocalin 2 [Source:MGI Symbol;Acc:MGI:96757]	2	4.88862	0.00267014	0.156891	10.7323	52.4777
ENSMUSG00000099931	Gm29358	predicted gene 29358 [Source:MGI Symbol;Acc:MGI:5580064]	1	-2.15085	0.00267241	0.156891	6.20912	2.87902
ENSMUSG00000016206	H2-M3	histocompatibility 2, M region locus 3 [Source:MGI Symbol;Acc:MGI:95915]	17	3.22139	0.00269075	0.156891	0.791414	2.5829
ENSMUSG00000086155	9430041J12Rik	RIKEN cDNA 9430041J12 gene [Source:MGI Symbol;Acc:MGI:1924573]	7	-5.26733	0.00269314	0.156891	0.900741	0.173256
ENSMUSG00000027584	Oprl1	opioid receptor-like 1 [Source:MGI Symbol;Acc:MGI:97440]	2	-6.82947	0.00270224	0.156891	0.428657	0.0550669
ENSMUSG00000027217	Tspan18	tetraspanin 18 [Source:MGI Symbol;Acc:MGI:1917186]	2	1.8125	0.00272939	0.15788	1.64296	2.98133
ENSMUSG00000048402	Gli2	GLI-Kruppel family member GLI2 [Source:MGI Symbol;Acc:MGI:95728]	1	2.18957	0.00278734	0.160464	2.682	5.87798
ENSMUSG00000028689	Ccdc163	coiled-coil domain containing 163 [Source:MGI Symbol;Acc:MGI:1915644]	4	-2.56906	0.0027972	0.160464	2.4662	0.954588
ENSMUSG00000026185	Igfbp5	insulin-like growth factor binding protein 5 [Source:MGI Symbol;Acc:MGI:96440]	1	2.62356	0.00280488	0.160464	19.973	52.4101
ENSMUSG00000027737	Slc7a11	solute carrier family 7 (cationic amino acid transporter, y+ system), member 11 [Source:MGI Symbol;Acc:MGI:1347355]	3	1.84823	0.00286468	0.162816	12.0424	22.2538
ENSMUSG00000109727	Gm45464	predicted gene 45464 [Source:MGI Symbol;Acc:MGI:5791300]	8	-4.27973	0.00289258	0.162816	1.45094	0.325806
ENSMUSG00000030806	Stx1b	syntaxin 1B [Source:MGI Symbol;Acc:MGI:1930705]	7	-2.34764	0.00289494	0.162816	11.0607	4.70041
ENSMUSG00000021676	Iqgap2	IQ motif containing GTPase activating protein 2 [Source:MGI Symbol;Acc:MGI:2449975]	13	1.99512	0.00290519	0.162816	7.8591	15.6877
ENSMUSG00000042349	Ikbke	inhibitor of kappaB kinase epsilon [Source:MGI Symbol;Acc:MGI:1929612]	1	2.90369	0.00291239	0.162816	0.244827	0.712178
ENSMUSG00000043557	Mdga1	MAM domain containing glycosylphosphatidylinositol anchor 1 [Source:MGI Symbol;Acc:MGI:1922012]	17	-2.34108	0.00291484	0.162816	4.51165	1.92173
ENSMUSG00000057098	Ebf1	early B cell factor 1 [Source:MGI Symbol;Acc:MGI:95275]	11	-2.98291	0.00292647	0.162816	0.755264	0.250487
ENSMUSG00000062151	Unc13c	unc-13 homolog C [Source:MGI Symbol;Acc:MGI:2149021]	9	-3.12836	0.0029294	0.162816	5.52941	1.76146
ENSMUSG00000045349	Sh2d5	SH2 domain containing 5 [Source:MGI Symbol;Acc:MGI:2446215]	4	-2.90165	0.0029513	0.163326	3.41802	1.1645
ENSMUSG00000021792	Prxl2a	peroxiredoxin like 2A [Source:MGI Symbol;Acc:MGI:1917814]	14	1.61801	0.00295949	0.163326	17.3787	28.1269
ENSMUSG00000079055	Slc8a3	solute carrier family 8 (sodium/calcium exchanger), member 3 [Source:MGI Symbol;Acc:MGI:107976]	12	-2.83696	0.00297937	0.163844	5.43877	1.90755
ENSMUSG00000048814	Lonrf2	LON peptidase N-terminal domain and ring finger 2 [Source:MGI Symbol;Acc:MGI:1920209]	1	-2.86791	0.00303092	0.165612	4.48954	1.55861
ENSMUSG00000037921	Ddx60	DExD/H box helicase 60 [Source:MGI Symbol;Acc:MGI:2384570]	8	2.30211	0.00303814	0.165612	0.771195	1.77786
ENSMUSG00000102692	Dchs2	dachsous cadherin related 2 [Source:MGI Symbol;Acc:MGI:2685263]	3	-6.20125	0.00304332	0.165612	0.193852	0.0296857
ENSMUSG00000024810	Il33	interleukin 33 [Source:MGI Symbol;Acc:MGI:1924375]	19	3.03599	0.00305755	0.165808	8.71575	26.4648
ENSMUSG00000061576	Dpp6	dipeptidylpeptidase 6 [Source:MGI Symbol;Acc:MGI:94921]	5	-3.34394	0.00312675	0.168975	3.01973	0.898826
ENSMUSG00000043448	Gjc2	gap junction protein, gamma 2 [Source:MGI Symbol;Acc:MGI:2153060]	11	-5.37415	0.00314592	0.169424	0.718211	0.121971
ENSMUSG00000049649	Gpr3	G-protein coupled receptor 3 [Source:MGI Symbol;Acc:MGI:101908]	4	-2.63025	0.00320433	0.171745	2.88464	1.09021
ENSMUSG00000022096	Hr	lysine demethylase and nuclear receptor corepressor [Source:MGI Symbol;Acc:MGI:96223]	14	-1.96486	0.00321101	0.171745	5.74307	2.92111
ENSMUSG00000025092	Hspa12a	heat shock protein 12A [Source:MGI Symbol;Acc:MGI:1920692]	19	-2.86004	0.00322536	0.171924	6.69707	2.33541
ENSMUSG00000004902	Slc25a18	solute carrier family 25 (mitochondrial carrier), member 18 [Source:MGI Symbol;Acc:MGI:1919053]	6	-2.57103	0.00325706	0.173023	2.91777	1.12023
ENSMUSG00000059857	Ntng1	netrin G1 [Source:MGI Symbol;Acc:MGI:1934028]	3	-2.96178	0.00329561	0.174032	2.69932	0.907278
ENSMUSG00000020620	Abca8b	ATP-binding cassette, sub-family A (ABC1), member 8b [Source:MGI Symbol;Acc:MGI:1351668]	11	-3.40865	0.00329833	0.174032	1.91601	0.556366
ENSMUSG00000031965	Tbx20	T-box 20 [Source:MGI Symbol;Acc:MGI:1888496]	9	4.50756	0.00331323	0.174229	0.105155	0.480537
ENSMUSG00000070371	Prss36	protease, serine 36 [Source:MGI Symbol;Acc:MGI:1924863]	7	3.01465	0.00337839	0.176312	0.298237	0.909511
ENSMUSG00000033849	B3galt2	UDP-Gal:betaGlcNAc beta 1,3-galactosyltransferase, polypeptide 2 [Source:MGI Symbol;Acc:MGI:1349461]	1	-6.22876	0.00342059	0.176312	1.99668	0.315894
ENSMUSG00000103119	Gm37583	predicted gene, 37583 [Source:MGI Symbol;Acc:MGI:5610811]	4	-3.24415	0.00342309	0.176312	11.6335	3.56385
ENSMUSG00000048540	Nhlh2	nescient helix loop helix 2 [Source:MGI Symbol;Acc:MGI:97324]	3	-6.48501	0.00342413	0.176312	1.61847	0.242342
ENSMUSG00000045532	C1ql1	complement component 1, q subcomponent-like 1 [Source:MGI Symbol;Acc:MGI:1344400]	11	-2.77213	0.00342708	0.176312	11.95	4.28639
ENSMUSG00000039058	Ak5	adenylate kinase 5 [Source:MGI Symbol;Acc:MGI:2677491]	3	-5.85789	0.00343129	0.176312	0.496333	0.0749474
ENSMUSG00000026587	Astn1	astrotactin 1 [Source:MGI Symbol;Acc:MGI:1098567]	1	-3.43638	0.00343187	0.176312	2.41599	0.697834
ENSMUSG00000047735	Samd9l	sterile alpha motif domain containing 9-like [Source:MGI Symbol;Acc:MGI:1343184]	6	2.98101	0.00346178	0.177266	0.830214	2.46948
ENSMUSG00000027570	Col9a3	collagen, type IX, alpha 3 [Source:MGI Symbol;Acc:MGI:894686]	2	2.5588	0.00352439	0.179088	4.61419	11.8246
ENSMUSG00000033955	Tnks1bp1	tankyrase 1 binding protein 1 [Source:MGI Symbol;Acc:MGI:2446193]	2	1.67727	0.00353661	0.179088	15.1381	25.3924
ENSMUSG00000034224	Slc38a8	solute carrier family 38, member 8 [Source:MGI Symbol;Acc:MGI:2685433]	8	4.39766	0.00354657	0.179088	0.207668	0.929892
ENSMUSG00000032184	Lysmd2	LysM, putative peptidoglycan-binding, domain containing 2 [Source:MGI Symbol;Acc:MGI:1917332]	9	-2.82105	0.00356264	0.179088	4.17684	1.47702
ENSMUSG00000058064	Gm10036	predicted gene 10036 [Source:MGI Symbol;Acc:MGI:3642334]	18	2.48848	0.00356358	0.179088	6.5436	16.2187
ENSMUSG00000113698	Gm47987	predicted gene, 47987 [Source:MGI Symbol;Acc:MGI:6097278]	12	-6.73902	0.00357738	0.179088	0.365715	0.0433407
ENSMUSG00000040265	Dnm3	dynamin 3 [Source:MGI Symbol;Acc:MGI:1341299]	1	-1.91839	0.00357764	0.179088	5.68511	2.96143
ENSMUSG00000026483	Niban1	niban apoptosis regulator 1 [Source:MGI Symbol;Acc:MGI:2137237]	1	1.9686	0.00363176	0.181217	7.05096	13.8877
ENSMUSG00000071847	Apcdd1	adenomatosis polyposis coli down-regulated 1 [Source:MGI Symbol;Acc:MGI:3513977]	18	2.24371	0.00365554	0.181822	0.852148	1.91343
ENSMUSG00000091931	Gon7	GON7 subunit of KEOPS complex [Source:MGI Symbol;Acc:MGI:4845848]	12	-3.35045	0.00368649	0.182371	2.50341	0.751731
ENSMUSG00000033880	Lgals3bp	lectin, galactoside-binding, soluble, 3 binding protein [Source:MGI Symbol;Acc:MGI:99554]	11	2.23075	0.00370057	0.182371	7.87382	17.5723
ENSMUSG00000042671	Rgs8	regulator of G-protein signaling 8 [Source:MGI Symbol;Acc:MGI:108408]	1	-1.92917	0.00370161	0.182371	4.52003	2.34123
ENSMUSG00000021583	Erap1	endoplasmic reticulum aminopeptidase 1 [Source:MGI Symbol;Acc:MGI:1933403]	13	1.81388	0.00373146	0.183264	2.77485	5.02569
ENSMUSG00000032135	Mcam	melanoma cell adhesion molecule [Source:MGI Symbol;Acc:MGI:1933966]	9	2.54253	0.00375355	0.183519	1.179	3.00507
ENSMUSG00000026421	Csrp1	cysteine and glycine-rich protein 1 [Source:MGI Symbol;Acc:MGI:88549]	1	-1.92328	0.00376015	0.183519	17.2735	8.95143
ENSMUSG00000068323	Slc4a5	solute carrier family 4, sodium bicarbonate cotransporter, member 5 [Source:MGI Symbol;Acc:MGI:2443220]	6	2.344	0.00377995	0.18391	7.70398	18.0683
ENSMUSG00000059361	Nrsn2	neurensin 2 [Source:MGI Symbol;Acc:MGI:2684969]	2	-5.28494	0.0037948	0.18406	3.62728	0.666758
ENSMUSG00000046618	Olfml2a	olfactomedin-like 2A [Source:MGI Symbol;Acc:MGI:2444741]	2	1.91149	0.00383013	0.185198	25.9027	49.5164
ENSMUSG00000028532	Cachd1	cache domain containing 1 [Source:MGI Symbol;Acc:MGI:2444177]	4	1.73252	0.00385958	0.186046	3.33057	5.77002
ENSMUSG00000046192	Iqub	IQ motif and ubiquitin domain containing [Source:MGI Symbol;Acc:MGI:3041159]	6	-4.97555	0.00389452	0.187153	0.631614	0.123585
ENSMUSG00000028268	Gbp3	guanylate binding protein 3 [Source:MGI Symbol;Acc:MGI:1926263]	3	2.57742	0.00394118	0.187758	2.68221	6.9055
ENSMUSG00000019850	Tnfaip3	tumor necrosis factor, alpha-induced protein 3 [Source:MGI Symbol;Acc:MGI:1196377]	10	1.65109	0.00394544	0.187758	33.4328	55.2063
ENSMUSG00000105504	Gbp5	guanylate binding protein 5 [Source:MGI Symbol;Acc:MGI:2429943]	3	2.98606	0.00395088	0.187758	0.576198	1.71912
ENSMUSG00000019796	Lrp11	low density lipoprotein receptor-related protein 11 [Source:MGI Symbol;Acc:MGI:2442989]	10	-3.09842	0.00396371	0.187758	6.83339	2.19047
ENSMUSG00000056144	Trim34a	tripartite motif-containing 34A [Source:MGI Symbol;Acc:MGI:2137359]	7	3.62321	0.00396723	0.187758	0.226664	0.843292
ENSMUSG00000092867	Mir3058	microRNA 3058 [Source:MGI Symbol;Acc:MGI:4834226]	10	4.74985	0.00399147	0.188014	7.80053	37.9238
ENSMUSG00000091405	H4c14	H4 clustered histone 14 [Source:MGI Symbol;Acc:MGI:2140113]	3	-2.27797	0.00399671	0.188014	4.47318	1.96076
ENSMUSG00000028222	Calb1	calbindin 1 [Source:MGI Symbol;Acc:MGI:88248]	4	-4.7934	0.00402924	0.188602	1.90021	0.388447
ENSMUSG00000082229	Nap1l2	nucleosome assembly protein 1-like 2 [Source:MGI Symbol;Acc:MGI:106654]	X	-3.00431	0.00403842	0.188602	3.91447	1.28822
ENSMUSG00000007570	Fance	Fanconi anemia, complementation group E [Source:MGI Symbol;Acc:MGI:1920025]	17	-2.16863	0.00404543	0.188602	7.14919	3.2813
ENSMUSG00000029095	Ablim2	actin-binding LIM protein 2 [Source:MGI Symbol;Acc:MGI:2385758]	5	-2.87842	0.00409053	0.189475	1.70183	0.584946
ENSMUSG00000027525	Phactr3	phosphatase and actin regulator 3 [Source:MGI Symbol;Acc:MGI:1921439]	2	-2.97701	0.00409882	0.189475	2.24276	0.748686
ENSMUSG00000052117	D630039A03Rik	RIKEN cDNA D630039A03 gene [Source:MGI Symbol;Acc:MGI:2442889]	4	3.87031	0.00410585	0.189475	0.290899	1.1473
ENSMUSG00000059003	Grin2a	glutamate receptor, ionotropic, NMDA2A (epsilon 1) [Source:MGI Symbol;Acc:MGI:95820]	16	-4.0476	0.00412099	0.189475	0.524238	0.127633
ENSMUSG00000050321	Neto1	neuropilin (NRP) and tolloid (TLL)-like 1 [Source:MGI Symbol;Acc:MGI:2180216]	18	-6.26572	0.00412483	0.189475	0.835567	0.129201
ENSMUSG00000020420	Zfp607a	zinc finger protein 607A [Source:MGI Symbol;Acc:MGI:3584526]	7	2.7504	0.0041488	0.189731	0.334972	0.930601
ENSMUSG00000024593	Megf10	multiple EGF-like-domains 10 [Source:MGI Symbol;Acc:MGI:2685177]	18	-2.52345	0.00415469	0.189731	1.3236	0.521497
ENSMUSG00000027580	Helz2	helicase with zinc finger 2, transcriptional coactivator [Source:MGI Symbol;Acc:MGI:2385169]	2	2.30314	0.00420796	0.189972	1.56979	3.61905
ENSMUSG00000056258	Kcnq3	potassium voltage-gated channel, subfamily Q, member 3 [Source:MGI Symbol;Acc:MGI:1336181]	15	-6.36536	0.0042109	0.189972	0.367435	0.0554372
ENSMUSG00000042854	Trp53rkb	transformation related protein 53 regulating kinase B [Source:MGI Symbol;Acc:MGI:1914050]	2	-2.45071	0.00421289	0.189972	1.12873	0.457735
ENSMUSG00000067279	Ppp1r3c	protein phosphatase 1, regulatory subunit 3C [Source:MGI Symbol;Acc:MGI:1858229]	19	-2.65056	0.00421425	0.189972	1.80542	0.669964
ENSMUSG00000029826	Zc3hav1	zinc finger CCCH type, antiviral 1 [Source:MGI Symbol;Acc:MGI:1926031]	6	2.01796	0.00423457	0.189972	5.30013	10.6892
ENSMUSG00000021091	Serpina3n	serine (or cysteine) peptidase inhibitor, clade A, member 3N [Source:MGI Symbol;Acc:MGI:105045]	12	2.80657	0.00423815	0.189972	26.6375	74.7475
ENSMUSG00000012428	Steap4	STEAP family member 4 [Source:MGI Symbol;Acc:MGI:1923560]	5	9.35733	0.00426648	0.189972	2.12447	19.9069
ENSMUSG00000068245	Phf11d	PHD finger protein 11D [Source:MGI Symbol;Acc:MGI:1277133]	14	2.6715	0.00429016	0.189972	0.45297	1.20708
ENSMUSG00000103427	Gm37534	predicted gene, 37534 [Source:MGI Symbol;Acc:MGI:5610762]	1	-3.10975	0.00429537	0.189972	1.90754	0.607202
ENSMUSG00000020684	Rasl10b	RAS-like, family 10, member B [Source:MGI Symbol;Acc:MGI:2685575]	11	-2.30687	0.00430649	0.189972	6.43116	2.78852
ENSMUSG00000015484	Fam163a	family with sequence similarity 163, member A [Source:MGI Symbol;Acc:MGI:3618859]	1	-3.42912	0.00432278	0.189972	1.11486	0.314884
ENSMUSG00000086175	Gm15802	predicted gene 15802 [Source:MGI Symbol;Acc:MGI:3801799]	16	-3.88806	0.00433654	0.189972	2.17582	0.554912
ENSMUSG00000037405	Icam1	intercellular adhesion molecule 1 [Source:MGI Symbol;Acc:MGI:96392]	9	1.9768	0.00434847	0.189972	6.7044	13.2428
ENSMUSG00000027070	Lrp2	low density lipoprotein receptor-related protein 2 [Source:MGI Symbol;Acc:MGI:95794]	2	1.86033	0.00436476	0.189972	2.40011	4.46564
ENSMUSG00000000617	Grm6	glutamate receptor, metabotropic 6 [Source:MGI Symbol;Acc:MGI:1351343]	11	-3.08824	0.00436798	0.189972	7.25604	2.34165
ENSMUSG00000039809	Gabbr2	gamma-aminobutyric acid (GABA) B receptor, 2 [Source:MGI Symbol;Acc:MGI:2386030]	4	-3.0797	0.00437841	0.189972	4.73196	1.52997
ENSMUSG00000030109	Slc6a12	solute carrier family 6 (neurotransmitter transporter, betaine/GABA), member 12 [Source:MGI Symbol;Acc:MGI:95628]	6	3.82275	0.0043826	0.189972	0.628958	2.4313
ENSMUSG00000026395	Ptprc	protein tyrosine phosphatase, receptor type, C [Source:MGI Symbol;Acc:MGI:97810]	1	2.91217	0.00438441	0.189972	0.0995735	0.292841
ENSMUSG00000026315	Serpinb8	serine (or cysteine) peptidase inhibitor, clade B, member 8 [Source:MGI Symbol;Acc:MGI:894657]	1	3.88178	0.00439108	0.189972	0.105514	0.415695
ENSMUSG00000046743	Fat4	FAT atypical cadherin 4 [Source:MGI Symbol;Acc:MGI:3045256]	3	2.06223	0.00445279	0.192109	20.8765	43.0546
ENSMUSG00000037541	Shank2	SH3 and multiple ankyrin repeat domains 2 [Source:MGI Symbol;Acc:MGI:2671987]	7	-2.38159	0.00447336	0.192211	4.31311	1.80692
ENSMUSG00000025738	Fbxl16	F-box and leucine-rich repeat protein 16 [Source:MGI Symbol;Acc:MGI:2448488]	17	-2.9124	0.00448227	0.192211	16.4408	5.63113
ENSMUSG00000057378	Ryr3	ryanodine receptor 3 [Source:MGI Symbol;Acc:MGI:99684]	2	-3.20369	0.00449205	0.192211	1.17135	0.363413
ENSMUSG00000037348	Paqr7	progestin and adipoQ receptor family member VII [Source:MGI Symbol;Acc:MGI:1919154]	4	2.33179	0.00451255	0.19256	3.23995	7.55668
ENSMUSG00000016349	Eef1a2	eukaryotic translation elongation factor 1 alpha 2 [Source:MGI Symbol;Acc:MGI:1096317]	2	-4.05862	0.00453861	0.193144	41.9301	10.3071
ENSMUSG00000028005	Gucy1b1	guanylate cyclase 1, soluble, beta 1 [Source:MGI Symbol;Acc:MGI:1860604]	3	-3.34936	0.0045648	0.193325	5.04736	1.49446
ENSMUSG00000022523	Fgf12	fibroblast growth factor 12 [Source:MGI Symbol;Acc:MGI:109183]	16	-2.65728	0.00458564	0.193325	2.72828	1.0198
ENSMUSG00000080316	Spaca6	sperm acrosome associated 6 [Source:MGI Symbol;Acc:MGI:1922452]	17	1.68566	0.00460037	0.193325	11.1454	18.7845
ENSMUSG00000004698	Hdac9	histone deacetylase 9 [Source:MGI Symbol;Acc:MGI:1931221]	12	-1.94207	0.0046032	0.193325	3.66653	1.88617
ENSMUSG00000018604	Tbx3	T-box 3 [Source:MGI Symbol;Acc:MGI:98495]	5	-4.94154	0.00460901	0.193325	1.12746	0.222831
ENSMUSG00000045871	Slitrk6	SLIT and NTRK-like family, member 6 [Source:MGI Symbol;Acc:MGI:2443198]	14	-7.42625	0.00461713	0.193325	0.758208	0.0939526
ENSMUSG00000030307	Slc6a11	solute carrier family 6 (neurotransmitter transporter, GABA), member 11 [Source:MGI Symbol;Acc:MGI:95630]	6	-5.22612	0.00465818	0.194523	7.88753	1.5003
ENSMUSG00000003617	Cp	ceruloplasmin [Source:MGI Symbol;Acc:MGI:88476]	3	1.75476	0.00470453	0.195934	48.9832	85.9514
ENSMUSG00000051439	Cd14	CD14 antigen [Source:MGI Symbol;Acc:MGI:88318]	18	3.36875	0.00474465	0.196562	2.08798	7.07356
ENSMUSG00000100801	Gm15459	predicted gene 15459 [Source:MGI Symbol;Acc:MGI:3705702]	5	-12.7572	0.00474864	0.196562	52.3207	4.09681
ENSMUSG00000046879	Irgm1	immunity-related GTPase family M member 1 [Source:MGI Symbol;Acc:MGI:107567]	11	1.79399	0.00475736	0.196562	8.8354	15.8484
ENSMUSG00000046093	Hpcal4	hippocalcin-like 4 [Source:MGI Symbol;Acc:MGI:2157521]	4	-3.09036	0.00479657	0.197659	3.53415	1.13456
ENSMUSG00000087192	Lexis1	lipid responsive LXR-induced inhibitor of cholesterol synthesis 1 [Source:MGI Symbol;Acc:MGI:1921191]	4	-4.07895	0.00486062	0.199772	1.17571	0.279441
ENSMUSG00000039372	Marchf4	membrane associated ring-CH-type finger 4 [Source:MGI Symbol;Acc:MGI:2683550]	1	-4.00638	0.00489689	0.200295	1.32545	0.322176
ENSMUSG00000030411	Nova2	NOVA alternative splicing regulator 2 [Source:MGI Symbol;Acc:MGI:104296]	7	-2.35254	0.00489902	0.200295	2.01317	0.852887
ENSMUSG00000021453	Gadd45g	growth arrest and DNA-damage-inducible 45 gamma [Source:MGI Symbol;Acc:MGI:1346325]	13	1.96477	0.00492197	0.200709	123.191	242.091
ENSMUSG00000109139	Gm44798	predicted gene 44798 [Source:MGI Symbol;Acc:MGI:5753374]	8	-5.39475	0.00494907	0.201288	1.0632	0.187535
ENSMUSG00000031217	Efnb1	ephrin B1 [Source:MGI Symbol;Acc:MGI:102708]	X	1.83601	0.00498123	0.201352	17.8003	32.6756
ENSMUSG00000066113	Adamtsl1	ADAMTS-like 1 [Source:MGI Symbol;Acc:MGI:1924989]	4	1.84812	0.00498624	0.201352	1.28512	2.37626
ENSMUSG00000020077	Srgn	serglycin [Source:MGI Symbol;Acc:MGI:97756]	10	4.12265	0.00498933	0.201352	0.682606	2.83968
ENSMUSG00000074151	Nlrc5	NLR family, CARD domain containing 5 [Source:MGI Symbol;Acc:MGI:3612191]	8	2.22753	0.00502095	0.201563	0.938098	2.09434
ENSMUSG00000029121	Crmp1	collapsin response mediator protein 1 [Source:MGI Symbol;Acc:MGI:107793]	5	-3.38027	0.00503477	0.201563	4.26573	1.25513
ENSMUSG00000041696	Rasl12	RAS-like, family 12 [Source:MGI Symbol;Acc:MGI:1918034]	9	1.9225	0.00504499	0.201563	2.71677	5.22189
ENSMUSG00000054889	Dsp	desmoplakin [Source:MGI Symbol;Acc:MGI:109611]	13	-7.24305	0.00504618	0.201563	2.04705	0.282745
ENSMUSG00000022906	Parp9	poly (ADP-ribose) polymerase family, member 9 [Source:MGI Symbol;Acc:MGI:1933117]	16	2.3406	0.00508618	0.202398	1.48541	3.46807
ENSMUSG00000032359	Ctsh	cathepsin H [Source:MGI Symbol;Acc:MGI:107285]	9	2.18835	0.00509299	0.202398	1.6008	3.51164
ENSMUSG00000032198	Dock6	dedicator of cytokinesis 6 [Source:MGI Symbol;Acc:MGI:1914789]	9	1.78275	0.00515922	0.204509	3.92558	7.00584
ENSMUSG00000055373	Fut9	fucosyltransferase 9 [Source:MGI Symbol;Acc:MGI:1330859]	4	-3.51381	0.00519905	0.205566	0.261623	0.0723436
ENSMUSG00000040420	Cdh18	cadherin 18 [Source:MGI Symbol;Acc:MGI:1344366]	15	-2.45294	0.00523543	0.206482	1.95251	0.79514
ENSMUSG00000021186	Fbln5	fibulin 5 [Source:MGI Symbol;Acc:MGI:1346091]	12	2.64416	0.00527151	0.207382	0.496607	1.31535
ENSMUSG00000039304	Tnfsf10	tumor necrosis factor (ligand) superfamily, member 10 [Source:MGI Symbol;Acc:MGI:107414]	3	3.96582	0.00530166	0.207628	0.223163	0.884922
ENSMUSG00000078794	Dact3	dishevelled-binding antagonist of beta-catenin 3 [Source:MGI Symbol;Acc:MGI:3654828]	7	-2.07613	0.00533527	0.207628	6.5129	3.12333
ENSMUSG00000073867	AA474408	expressed sequence AA474408 [Source:MGI Symbol;Acc:MGI:3034216]	7	-4.13926	0.00533728	0.207628	0.554399	0.126165
ENSMUSG00000021763	Cspg4b	chondroitin sulfate proteoglycan 4B [Source:MGI Symbol;Acc:MGI:3040697]	13	1.83167	0.00534333	0.207628	3.43977	6.30304
ENSMUSG00000030402	Ppm1n	protein phosphatase, Mg2+/Mn2+ dependent, 1N (putative) [Source:MGI Symbol;Acc:MGI:2142330]	7	-2.26693	0.00534847	0.207628	12.0483	5.28864
ENSMUSG00000048603	Gm9828	predicted gene 9828 [Source:MGI Symbol;Acc:MGI:3642913]	13	-6.31259	0.0053708	0.207628	0.561403	0.0757996
ENSMUSG00000020467	Efemp1	epidermal growth factor-containing fibulin-like extracellular matrix protein 1 [Source:MGI Symbol;Acc:MGI:1339998]	11	2.09048	0.00538117	0.207628	17.8212	37.2716
ENSMUSG00000066392	Nrxn3	neurexin III [Source:MGI Symbol;Acc:MGI:1096389]	12	-3.11156	0.00538412	0.207628	8.52605	2.73607
ENSMUSG00000102747	Gm37602	predicted gene, 37602 [Source:MGI Symbol;Acc:MGI:5610830]	1	-3.66046	0.00540679	0.207988	0.571404	0.150314
ENSMUSG00000027832	Ptx3	pentraxin related gene [Source:MGI Symbol;Acc:MGI:104641]	3	4.56107	0.00547688	0.210167	22.2261	101.38
ENSMUSG00000024940	Ltbp3	latent transforming growth factor beta binding protein 3 [Source:MGI Symbol;Acc:MGI:1101355]	19	1.67128	0.00551786	0.211221	23.157	38.7045
ENSMUSG00000004043	Stat5a	signal transducer and activator of transcription 5A [Source:MGI Symbol;Acc:MGI:103036]	11	-1.8826	0.00554753	0.211837	4.17401	2.22207
ENSMUSG00000037843	Vstm2l	V-set and transmembrane domain containing 2-like [Source:MGI Symbol;Acc:MGI:2685537]	2	-3.56434	0.0055984	0.213258	7.60693	2.1049
ENSMUSG00000087684	1200007C13Rik	RIKEN cDNA 1200007C13 gene [Source:MGI Symbol;Acc:MGI:1921369]	2	2.55142	0.00564102	0.214359	2.10977	5.39982
ENSMUSG00000055013	Agap1	ArfGAP with GTPase domain, ankyrin repeat and PH domain 1 [Source:MGI Symbol;Acc:MGI:2653690]	1	-1.72389	0.00567208	0.215016	13.2549	7.68774
ENSMUSG00000040035	Disp2	dispatched RND tramsporter family member 2 [Source:MGI Symbol;Acc:MGI:2388733]	2	-3.64016	0.00571384	0.216075	4.23838	1.15926
ENSMUSG00000018411	Mapt	microtubule-associated protein tau [Source:MGI Symbol;Acc:MGI:97180]	11	-2.86786	0.00579714	0.218527	5.23556	1.81932
ENSMUSG00000044461	Shisa2	shisa family member 2 [Source:MGI Symbol;Acc:MGI:2444716]	14	2.06416	0.00580668	0.218527	3.2083	6.64092
ENSMUSG00000056900	Usp13	ubiquitin specific peptidase 13 (isopeptidase T-3) [Source:MGI Symbol;Acc:MGI:1919857]	3	-2.01611	0.00583707	0.219143	1.43191	0.707267
ENSMUSG00000029055	Plch2	phospholipase C, eta 2 [Source:MGI Symbol;Acc:MGI:2443078]	4	-2.21819	0.00588826	0.220407	23.2294	10.4668
ENSMUSG00000036782	Klhl13	kelch-like 13 [Source:MGI Symbol;Acc:MGI:1914705]	X	-2.72066	0.00589898	0.220407	1.02388	0.376182
ENSMUSG00000052305	Hbb-bs	hemoglobin, beta adult s chain [Source:MGI Symbol;Acc:MGI:5474852]	7	2.24465	0.00595254	0.221601	77.0673	173.018
ENSMUSG00000022894	Adamts5	a disintegrin-like and metallopeptidase (reprolysin type) with thrombospondin type 1 motif, 5 (aggrecanase-2) [Source:MGI Symbol;Acc:MGI:1346321]	16	1.64313	0.0059593	0.221601	3.60665	5.92557
ENSMUSG00000009772	Nuak2	NUAK family, SNF1-like kinase, 2 [Source:MGI Symbol;Acc:MGI:1921387]	1	1.85674	0.00600202	0.222573	3.12447	5.81198
ENSMUSG00000104271	Gm37891	predicted gene, 37891 [Source:MGI Symbol;Acc:MGI:5611119]	2	-2.72018	0.00601393	0.222573	4.74037	1.72671
ENSMUSG00000044667	Plppr4	phospholipid phosphatase related 4 [Source:MGI Symbol;Acc:MGI:106530]	3	-4.11389	0.00608932	0.224597	1.87042	0.447929
ENSMUSG00000000263	Glra1	glycine receptor, alpha 1 subunit [Source:MGI Symbol;Acc:MGI:95747]	11	-3.85128	0.00610983	0.224597	3.09192	0.791409
ENSMUSG00000085743	8430419K02Rik	RIKEN cDNA 8430419K02 gene [Source:MGI Symbol;Acc:MGI:1921768]	11	-2.72137	0.00611177	0.224597	2.20264	0.811106
ENSMUSG00000050663	Trhde	TRH-degrading enzyme [Source:MGI Symbol;Acc:MGI:2384311]	10	-5.33407	0.00613371	0.224874	0.603751	0.11136
ENSMUSG00000031748	Gnao1	guanine nucleotide binding protein, alpha O [Source:MGI Symbol;Acc:MGI:95775]	8	-1.96322	0.00615821	0.225243	11.0081	5.60343
ENSMUSG00000055407	Map6	microtubule-associated protein 6 [Source:MGI Symbol;Acc:MGI:1201690]	7	-1.6367	0.00622948	0.225672	6.23411	3.80385
ENSMUSG00000025478	Dpysl4	dihydropyrimidinase-like 4 [Source:MGI Symbol;Acc:MGI:1349764]	7	-1.99076	0.00623395	0.225672	5.65671	2.83514
ENSMUSG00000103976	Gm37677	predicted gene, 37677 [Source:MGI Symbol;Acc:MGI:5610905]	1	-2.29069	0.00624259	0.225672	1.85519	0.808103
ENSMUSG00000024079	Eif2ak2	eukaryotic translation initiation factor 2-alpha kinase 2 [Source:MGI Symbol;Acc:MGI:1353449]	17	1.95109	0.00624734	0.225672	3.28766	6.41411
ENSMUSG00000034730	Adgrb1	adhesion G protein-coupled receptor B1 [Source:MGI Symbol;Acc:MGI:1933736]	15	-2.54409	0.00624821	0.225672	5.59561	2.19344
ENSMUSG00000032735	Ablim3	actin binding LIM protein family, member 3 [Source:MGI Symbol;Acc:MGI:2442582]	18	-3.06235	0.00625661	0.225672	1.58682	0.513218
ENSMUSG00000039914	Coq10a	coenzyme Q10A [Source:MGI Symbol;Acc:MGI:2684847]	10	-2.16531	0.00628682	0.225953	4.5774	2.1194
ENSMUSG00000109852	Gm45360	predicted gene 45360 [Source:MGI Symbol;Acc:MGI:5791196]	8	-3.12859	0.00631283	0.225953	1.82941	0.58555
ENSMUSG00000029861	Fam131b	family with sequence similarity 131, member B [Source:MGI Symbol;Acc:MGI:1923406]	6	-2.46493	0.00631406	0.225953	1.74563	0.705435
ENSMUSG00000015568	Lpl	lipoprotein lipase [Source:MGI Symbol;Acc:MGI:96820]	8	1.73297	0.00632228	0.225953	2.59407	4.49875
ENSMUSG00000025867	Cplx2	complexin 2 [Source:MGI Symbol;Acc:MGI:104726]	13	-2.34139	0.00635885	0.226496	10.1729	4.33717
ENSMUSG00000002341	Ncan	neurocan [Source:MGI Symbol;Acc:MGI:104694]	8	-3.89894	0.0063729	0.226496	0.446181	0.114343
ENSMUSG00000028785	Hpca	hippocalcin [Source:MGI Symbol;Acc:MGI:1336200]	4	-3.60599	0.00640339	0.226496	4.16067	1.1404
ENSMUSG00000031565	Fgfr1	fibroblast growth factor receptor 1 [Source:MGI Symbol;Acc:MGI:95522]	8	1.73387	0.00640357	0.226496	32.6947	56.6829
ENSMUSG00000024268	Celf4	CUGBP, Elav-like family member 4 [Source:MGI Symbol;Acc:MGI:1932407]	18	-3.10034	0.00641301	0.226496	8.00145	2.57529
ENSMUSG00000026235	Epha4	Eph receptor A4 [Source:MGI Symbol;Acc:MGI:98277]	1	-2.07943	0.00644848	0.226496	2.09768	1.00354
ENSMUSG00000023805	Synj2	synaptojanin 2 [Source:MGI Symbol;Acc:MGI:1201671]	17	-2.72316	0.00648317	0.226496	1.59601	0.581068
ENSMUSG00000059713	Rcan3	regulator of calcineurin 3 [Source:MGI Symbol;Acc:MGI:1858220]	4	-1.7777	0.00649039	0.226496	6.79316	3.81344
ENSMUSG00000079355	Ackr4	atypical chemokine receptor 4 [Source:MGI Symbol;Acc:MGI:2181676]	9	4.40594	0.0064925	0.226496	0.098183	0.437877
ENSMUSG00000029838	Ptn	pleiotrophin [Source:MGI Symbol;Acc:MGI:97804]	6	1.60693	0.00650784	0.226496	23.1889	37.2764
ENSMUSG00000028445	Enho	energy homeostasis associated [Source:MGI Symbol;Acc:MGI:1916888]	4	-2.58627	0.00651114	0.226496	3.37663	1.28302
ENSMUSG00000042116	Vwa1	von Willebrand factor A domain containing 1 [Source:MGI Symbol;Acc:MGI:2179729]	4	-3.4966	0.0065278	0.226496	0.700182	0.194212
ENSMUSG00000099843	Gm7160	predicted gene 7160 [Source:MGI Symbol;Acc:MGI:3646078]	1	3.05091	0.00652848	0.226496	0.683854	2.12985
ENSMUSG00000006586	Runx1t1	RUNX1 translocation partner 1 [Source:MGI Symbol;Acc:MGI:104793]	4	-3.45584	0.0065405	0.226496	2.3539	0.675406
ENSMUSG00000042388	Dlgap3	DLG associated protein 3 [Source:MGI Symbol;Acc:MGI:3039563]	4	-2.84424	0.00658149	0.227194	5.13117	1.79355
ENSMUSG00000031595	Pdgfrl	platelet-derived growth factor receptor-like [Source:MGI Symbol;Acc:MGI:1916047]	8	-4.15739	0.00658976	0.227194	1.12451	0.270065
ENSMUSG00000035557	Krt17	keratin 17 [Source:MGI Symbol;Acc:MGI:96691]	11	-5.17172	0.00661634	0.227608	2.98407	0.551407
ENSMUSG00000110676	Gm45897	predicted gene 45897 [Source:MGI Symbol;Acc:MGI:5805012]	9	-6.04615	0.00664608	0.228129	0.536112	0.0727551
ENSMUSG00000026064	Ptp4a1	protein tyrosine phosphatase 4a1 [Source:MGI Symbol;Acc:MGI:1277096]	1	2.31545	0.00667248	0.228533	0.722351	1.67475
ENSMUSG00000002325	Irf9	interferon regulatory factor 9 [Source:MGI Symbol;Acc:MGI:107587]	14	1.7455	0.00672271	0.229441	5.01994	8.77651
ENSMUSG00000053141	Ptprt	protein tyrosine phosphatase, receptor type, T [Source:MGI Symbol;Acc:MGI:1321152]	2	-3.49834	0.00672838	0.229441	1.64133	0.465726
ENSMUSG00000052921	Arhgef15	Rho guanine nucleotide exchange factor (GEF) 15 [Source:MGI Symbol;Acc:MGI:3045246]	11	-5.59846	0.00683126	0.231774	0.273076	0.0444149
ENSMUSG00000034739	Mfrp	membrane frizzled-related protein [Source:MGI Symbol;Acc:MGI:2385957]	9	3.14627	0.00684496	0.231774	2.6913	8.47926
ENSMUSG00000020656	Grhl1	grainyhead like transcription factor 1 [Source:MGI Symbol;Acc:MGI:2182540]	12	-2.14908	0.00685475	0.231774	2.47949	1.1537
ENSMUSG00000030683	Sez6l2	seizure related 6 homolog like 2 [Source:MGI Symbol;Acc:MGI:2385295]	7	-2.67772	0.00685618	0.231774	5.77715	2.1476
ENSMUSG00000103924	Gm37895	predicted gene, 37895 [Source:MGI Symbol;Acc:MGI:5611123]	1	-5.42232	0.00705366	0.236283	0.65911	0.116708
ENSMUSG00000039629	Strip2	striatin interacting protein 2 [Source:MGI Symbol;Acc:MGI:2444363]	6	-3.30366	0.0070595	0.236283	3.02278	0.90979
ENSMUSG00000033007	Asic4	acid-sensing (proton-gated) ion channel family member 4 [Source:MGI Symbol;Acc:MGI:2652846]	1	-3.36674	0.00707062	0.236283	5.53033	1.62572
ENSMUSG00000019230	Lhx9	LIM homeobox protein 9 [Source:MGI Symbol;Acc:MGI:1316721]	1	-7.97221	0.00708368	0.236283	0.487213	0.0583297
ENSMUSG00000052819	Best2	bestrophin 2 [Source:MGI Symbol;Acc:MGI:2387588]	8	2.42173	0.00709116	0.236283	2.42026	5.87264
ENSMUSG00000062209	Erbb4	erb-b2 receptor tyrosine kinase 4 [Source:MGI Symbol;Acc:MGI:104771]	1	1.81552	0.0070937	0.236283	1.42338	2.58456
ENSMUSG00000034777	Vax2	ventral anterior homeobox 2 [Source:MGI Symbol;Acc:MGI:1346018]	6	-2.53033	0.00709657	0.236283	16.9905	6.69957
ENSMUSG00000050830	Vwc2	von Willebrand factor C domain containing 2 [Source:MGI Symbol;Acc:MGI:2442987]	11	-3.19694	0.00711059	0.236283	0.677591	0.211258
ENSMUSG00000041439	Mfsd6	major facilitator superfamily domain containing 6 [Source:MGI Symbol;Acc:MGI:1922925]	1	-1.6699	0.00712781	0.236353	3.7013	2.21782
ENSMUSG00000039774	Galnt12	polypeptide N-acetylgalactosaminyltransferase 12 [Source:MGI Symbol;Acc:MGI:2444664]	4	2.35275	0.00721446	0.2378	1.06626	2.52603
ENSMUSG00000074657	Kif5a	kinesin family member 5A [Source:MGI Symbol;Acc:MGI:109564]	10	-2.64852	0.00721688	0.2378	13.3282	5.02669
ENSMUSG00000049858	Suox	sulfite oxidase [Source:MGI Symbol;Acc:MGI:2446117]	10	1.84353	0.0072339	0.2378	3.07029	5.66577
ENSMUSG00000039533	Mmd2	monocyte to macrophage differentiation-associated 2 [Source:MGI Symbol;Acc:MGI:1922354]	5	-2.81066	0.00723841	0.2378	2.9502	1.04073
ENSMUSG00000023267	Gabrr2	gamma-aminobutyric acid (GABA) C receptor, subunit rho 2 [Source:MGI Symbol;Acc:MGI:95626]	4	-2.97035	0.00724757	0.2378	6.49024	2.16907
ENSMUSG00000027238	Frmd5	FERM domain containing 5 [Source:MGI Symbol;Acc:MGI:2442557]	2	-2.67104	0.0072691	0.238006	4.59475	1.7138
ENSMUSG00000020524	Gria1	glutamate receptor, ionotropic, AMPA1 (alpha 1) [Source:MGI Symbol;Acc:MGI:95808]	11	-2.30975	0.00730756	0.2383	3.3803	1.45668
ENSMUSG00000115148	Gm49125	predicted gene, 49125 [Source:MGI Symbol;Acc:MGI:6118530]	14	-2.43216	0.00730859	0.2383	3.64687	1.48971
ENSMUSG00000023947	Nfkbie	nuclear factor of kappa light polypeptide gene enhancer in B cells inhibitor, epsilon [Source:MGI Symbol;Acc:MGI:1194908]	17	2.08097	0.0073341	0.238439	8.74153	18.2079
ENSMUSG00000044951	Mylk4	myosin light chain kinase family, member 4 [Source:MGI Symbol;Acc:MGI:3643758]	13	2.98656	0.00736033	0.238439	0.200762	0.597638
ENSMUSG00000029287	Tgfbr3	transforming growth factor, beta receptor III [Source:MGI Symbol;Acc:MGI:104637]	5	1.6318	0.00737143	0.238439	8.06072	13.1584
ENSMUSG00000026991	Pkp4	plakophilin 4 [Source:MGI Symbol;Acc:MGI:109281]	2	1.63332	0.00737393	0.238439	23.0625	37.6761
ENSMUSG00000028351	Brinp1	bone morphogenic protein/retinoic acid inducible neural specific 1 [Source:MGI Symbol;Acc:MGI:1928478]	4	-3.07082	0.0074631	0.240344	1.20989	0.387359
ENSMUSG00000027834	Serpini1	serine (or cysteine) peptidase inhibitor, clade I, member 1 [Source:MGI Symbol;Acc:MGI:1194506]	3	-3.61894	0.00746363	0.240344	1.77898	0.485815
ENSMUSG00000045493	Bhlhe23	basic helix-loop-helix family, member e23 [Source:MGI Symbol;Acc:MGI:2153710]	2	-4.04848	0.00750603	0.241212	2.63684	0.64071
ENSMUSG00000022876	Samsn1	SAM domain, SH3 domain and nuclear localization signals, 1 [Source:MGI Symbol;Acc:MGI:1914992]	16	-2.98461	0.00756202	0.242223	2.00689	0.664259
ENSMUSG00000036972	Zic4	zinc finger protein of the cerebellum 4 [Source:MGI Symbol;Acc:MGI:107201]	9	2.95162	0.0075685	0.242223	0.231611	0.689367
ENSMUSG00000055413	H2-Q5	histocompatibility 2, Q region locus 5 [Source:MGI Symbol;Acc:MGI:95934]	17	3.41003	0.00763674	0.243368	0.387958	1.34147
ENSMUSG00000029608	Rph3a	rabphilin 3A [Source:MGI Symbol;Acc:MGI:102788]	5	-2.42368	0.0076458	0.243368	14.2962	5.88903
ENSMUSG00000059149	Mfsd4a	major facilitator superfamily domain containing 4A [Source:MGI Symbol;Acc:MGI:2442786]	1	-3.24039	0.00765103	0.243368	1.07499	0.329819
ENSMUSG00000030022	Adamts9	a disintegrin-like and metallopeptidase (reprolysin type) with thrombospondin type 1 motif, 9 [Source:MGI Symbol;Acc:MGI:1916320]	6	3.91442	0.00768147	0.24384	0.420834	1.6495
ENSMUSG00000027350	Chgb	chromogranin B [Source:MGI Symbol;Acc:MGI:88395]	2	-3.0551	0.00773629	0.245033	53.4466	17.4749
ENSMUSG00000043003	Rasef	RAS and EF hand domain containing [Source:MGI Symbol;Acc:MGI:2448565]	4	3.43587	0.00776492	0.245033	0.942488	3.24994
ENSMUSG00000010067	Rassf1	Ras association (RalGDS/AF-6) domain family member 1 [Source:MGI Symbol;Acc:MGI:1928386]	9	1.71772	0.00778569	0.245033	3.43191	5.89432
ENSMUSG00000044117	Bmerb1	bMERB domain containing 1 [Source:MGI Symbol;Acc:MGI:1914504]	16	-2.94022	0.0077946	0.245033	6.01826	2.03222
ENSMUSG00000006154	Eps8l1	EPS8-like 1 [Source:MGI Symbol;Acc:MGI:1914675]	7	-2.96451	0.00780878	0.245033	1.59088	0.533882
ENSMUSG00000069919	Hba-a1	hemoglobin alpha, adult chain 1 [Source:MGI Symbol;Acc:MGI:96015]	11	2.33597	0.00782014	0.245033	36.8422	86.1162
ENSMUSG00000025221	Kcnip2	Kv channel-interacting protein 2 [Source:MGI Symbol;Acc:MGI:2135916]	19	-3.45676	0.00782888	0.245033	1.18094	0.339072
ENSMUSG00000040296	Ddx58	DEAD/H box helicase 58 [Source:MGI Symbol;Acc:MGI:2442858]	4	2.19365	0.00786801	0.245375	1.58516	3.47832
ENSMUSG00000026109	Tmeff2	transmembrane protein with EGF-like and two follistatin-like domains 2 [Source:MGI Symbol;Acc:MGI:1861735]	1	-4.66032	0.00787122	0.245375	0.282023	0.0563178
ENSMUSG00000053825	Ppfia2	protein tyrosine phosphatase, receptor type, f polypeptide (PTPRF), interacting protein (liprin), alpha 2 [Source:MGI Symbol;Acc:MGI:2443834]	10	-2.32942	0.00793764	0.246022	5.72827	2.45541
ENSMUSG00000050199	Lgr4	leucine-rich repeat-containing G protein-coupled receptor 4 [Source:MGI Symbol;Acc:MGI:1891468]	2	1.72882	0.00796545	0.246022	15.5104	26.8221
ENSMUSG00000021708	Rasgrf2	RAS protein-specific guanine nucleotide-releasing factor 2 [Source:MGI Symbol;Acc:MGI:109137]	13	-1.98393	0.00798024	0.246022	13.3839	6.74059
ENSMUSG00000030268	Bcat1	branched chain aminotransferase 1, cytosolic [Source:MGI Symbol;Acc:MGI:104861]	6	-2.53558	0.00798287	0.246022	7.94081	3.12604
ENSMUSG00000036019	Tmtc2	transmembrane and tetratricopeptide repeat containing 2 [Source:MGI Symbol;Acc:MGI:1914057]	10	-2.29441	0.00798981	0.246022	2.89129	1.25518
ENSMUSG00000039714	Cplx3	complexin 3 [Source:MGI Symbol;Acc:MGI:2384571]	9	-3.0568	0.00799102	0.246022	18.3109	5.9751
ENSMUSG00000105264	Gm42716	predicted gene 42716 [Source:MGI Symbol;Acc:MGI:5662853]	5	-2.56572	0.00800225	0.246022	5.0014	1.9361
ENSMUSG00000033768	Nrxn2	neurexin II [Source:MGI Symbol;Acc:MGI:1096362]	19	-3.48529	0.00802155	0.246131	5.91346	1.69348
ENSMUSG00000037217	Syn1	synapsin I [Source:MGI Symbol;Acc:MGI:98460]	X	-3.03074	0.00804007	0.2462	11.2738	3.70591
ENSMUSG00000020183	Cpm	carboxypeptidase M [Source:MGI Symbol;Acc:MGI:1917824]	10	-2.36348	0.00805837	0.2462	2.79212	1.17365
ENSMUSG00000040724	Kcna2	potassium voltage-gated channel, shaker-related subfamily, member 2 [Source:MGI Symbol;Acc:MGI:96659]	3	-3.2499	0.00807111	0.2462	2.66088	0.815222
ENSMUSG00000028255	Clca1	chloride channel accessory 1 [Source:MGI Symbol;Acc:MGI:1346342]	3	-4.10926	0.00809986	0.246596	0.646564	0.151535
ENSMUSG00000025582	Nptx1	neuronal pentraxin 1 [Source:MGI Symbol;Acc:MGI:107811]	11	-2.57658	0.00811956	0.246714	6.43467	2.48795
ENSMUSG00000026712	Mrc1	mannose receptor, C type 1 [Source:MGI Symbol;Acc:MGI:97142]	2	3.0238	0.0081524	0.247231	0.339495	1.03725
ENSMUSG00000003228	Grk5	G protein-coupled receptor kinase 5 [Source:MGI Symbol;Acc:MGI:109161]	19	1.80776	0.00823965	0.249393	2.33306	4.21453
ENSMUSG00000034310	Tmem132d	transmembrane protein 132D [Source:MGI Symbol;Acc:MGI:3044963]	5	-2.89452	0.00826762	0.249756	2.33023	0.797342
ENSMUSG00000049580	Tsku	tsukushi, small leucine rich proteoglycan [Source:MGI Symbol;Acc:MGI:2443855]	7	2.00961	0.00829557	0.249757	2.81934	5.66141
ENSMUSG00000021301	Hecw1	HECT, C2 and WW domain containing E3 ubiquitin protein ligase 1 [Source:MGI Symbol;Acc:MGI:2444115]	13	-3.12837	0.00830438	0.249757	1.2931	0.4106
ENSMUSG00000054072	Iigp1	interferon inducible GTPase 1 [Source:MGI Symbol;Acc:MGI:1926259]	18	3.91301	0.00831564	0.249757	0.0843006	0.332999
ENSMUSG00000041180	Hectd2	HECT domain E3 ubiquitin protein ligase 2 [Source:MGI Symbol;Acc:MGI:2442663]	19	-2.66444	0.0083322	0.249774	1.20912	0.448639
ENSMUSG00000051855	Mest	mesoderm specific transcript [Source:MGI Symbol;Acc:MGI:96968]	6	1.83898	0.00837852	0.250165	15.9779	29.3737
ENSMUSG00000021750	Fam107a	family with sequence similarity 107, member A [Source:MGI Symbol;Acc:MGI:3041256]	14	2.22174	0.00838894	0.250165	6.7615	15.0357
ENSMUSG00000042804	Gpr153	G protein-coupled receptor 153 [Source:MGI Symbol;Acc:MGI:1916157]	4	-1.81901	0.00839329	0.250165	10.0439	5.51717
ENSMUSG00000039057	Myo16	myosin XVI [Source:MGI Symbol;Acc:MGI:2685951]	8	-1.8564	0.0085209	0.253485	1.76544	0.950218
ENSMUSG00000074340	Ovgp1	oviductal glycoprotein 1 [Source:MGI Symbol;Acc:MGI:106661]	3	-2.50757	0.00855667	0.254065	1.15991	0.454207
ENSMUSG00000024176	Sox8	SRY (sex determining region Y)-box 8 [Source:MGI Symbol;Acc:MGI:98370]	17	-5.20297	0.00857743	0.254198	3.06321	0.584542
ENSMUSG00000005968	Tuft1	tuftelin 1 [Source:MGI Symbol;Acc:MGI:109572]	3	1.69972	0.0086766	0.255881	10.9031	18.5296
ENSMUSG00000043419	Rnf227	ring finger protein 227 [Source:MGI Symbol;Acc:MGI:1915359]	11	-2.77978	0.00868193	0.255881	3.32468	1.1876
ENSMUSG00000030403	Vasp	vasodilator-stimulated phosphoprotein [Source:MGI Symbol;Acc:MGI:109268]	7	1.67704	0.00868337	0.255881	14.2527	23.8768
ENSMUSG00000035640	Cbarp	calcium channel, voltage-dependent, beta subunit associated regulatory protein [Source:MGI Symbol;Acc:MGI:1354170]	10	-1.72002	0.00871122	0.256218	9.95567	5.78854
ENSMUSG00000057346	Apol9a	apolipoprotein L 9a [Source:MGI Symbol;Acc:MGI:3606001]	15	3.40695	0.00875505	0.257023	0.235882	0.801087
ENSMUSG00000000792	Slc5a5	solute carrier family 5 (sodium iodide symporter), member 5 [Source:MGI Symbol;Acc:MGI:2149330]	8	2.51243	0.00879808	0.25751	1.36617	3.43412
ENSMUSG00000058046	4933430I17Rik	RIKEN cDNA 4933430I17 gene [Source:MGI Symbol;Acc:MGI:3045314]	4	-3.56006	0.00880459	0.25751	1.28338	0.351435
ENSMUSG00000020027	Socs2	suppressor of cytokine signaling 2 [Source:MGI Symbol;Acc:MGI:1201787]	10	-2.04152	0.00882126	0.257515	1.13612	0.553279
ENSMUSG00000037771	Slc32a1	solute carrier family 32 (GABA vesicular transporter), member 1 [Source:MGI Symbol;Acc:MGI:1194488]	2	-4.4869	0.00884592	0.257753	8.33943	1.84355
ENSMUSG00000046182	Gsg1l	GSG1-like [Source:MGI Symbol;Acc:MGI:2685483]	7	-3.32505	0.00888121	0.257953	1.55969	0.466163
ENSMUSG00000013155	Enkd1	enkurin domain containing 1 [Source:MGI Symbol;Acc:MGI:2142593]	8	-2.08033	0.00888581	0.257953	2.51998	1.20618
ENSMUSG00000063954	H2ac19	H2A clustered histone 19 [Source:MGI Symbol;Acc:MGI:2448283]	3	3.37249	0.0089323	0.258821	1.77531	6.07128
ENSMUSG00000034799	Unc13a	unc-13 homolog A [Source:MGI Symbol;Acc:MGI:3051532]	8	-2.47182	0.0089686	0.258838	6.02942	2.43558
ENSMUSG00000061578	Ksr2	kinase suppressor of ras 2 [Source:MGI Symbol;Acc:MGI:3610315]	5	-1.86818	0.00898	0.258838	1.58987	0.851456
ENSMUSG00000048483	Zdhhc22	zinc finger, DHHC-type containing 22 [Source:MGI Symbol;Acc:MGI:2685108]	12	-4.03482	0.00898259	0.258838	2.78099	0.677603
ENSMUSG00000083274	Zcchc9-ps	zinc finger, CCHC domain containing 9, pseudogene [Source:MGI Symbol;Acc:MGI:3651106]	2	-3.54569	0.00902749	0.259404	2.51078	0.693807
ENSMUSG00000022469	Rapgef3	Rap guanine nucleotide exchange factor (GEF) 3 [Source:MGI Symbol;Acc:MGI:2441741]	15	1.76486	0.00906376	0.259404	7.24552	12.7872
ENSMUSG00000051335	Gfod1	glucose-fructose oxidoreductase domain containing 1 [Source:MGI Symbol;Acc:MGI:2145304]	13	-2.13717	0.00908022	0.259404	3.79679	1.77149
ENSMUSG00000002930	Ppp1r17	protein phosphatase 1, regulatory subunit 17 [Source:MGI Symbol;Acc:MGI:1333876]	6	-4.28556	0.00909415	0.259404	0.814732	0.176085
ENSMUSG00000035107	Dcbld2	discoidin, CUB and LCCL domain containing 2 [Source:MGI Symbol;Acc:MGI:1920629]	16	1.61849	0.00911053	0.259404	6.00439	9.7136
ENSMUSG00000029651	Mtus2	microtubule associated tumor suppressor candidate 2 [Source:MGI Symbol;Acc:MGI:1915388]	5	-2.0582	0.00912594	0.259404	3.79215	1.83981
ENSMUSG00000044254	Pcsk9	proprotein convertase subtilisin/kexin type 9 [Source:MGI Symbol;Acc:MGI:2140260]	4	4.12407	0.00913052	0.259404	0.413226	1.71721
ENSMUSG00000027239	Mdk	midkine [Source:MGI Symbol;Acc:MGI:96949]	2	1.9124	0.00914761	0.259404	5.95654	11.4284
ENSMUSG00000020135	Apc2	APC regulator of WNT signaling pathway 2 [Source:MGI Symbol;Acc:MGI:1346052]	10	-2.12995	0.00915208	0.259404	4.01216	1.88152
ENSMUSG00000112388	AI463170	expressed sequence AI463170 [Source:MGI Symbol;Acc:MGI:2144839]	12	4.97462	0.00916833	0.259404	0.430917	2.18196
ENSMUSG00000020122	Egfr	epidermal growth factor receptor [Source:MGI Symbol;Acc:MGI:95294]	11	1.69998	0.00923612	0.260849	4.79071	8.13819
ENSMUSG00000031543	Ank1	ankyrin 1, erythroid [Source:MGI Symbol;Acc:MGI:88024]	8	-2.89578	0.00928138	0.261391	2.37414	0.817062
ENSMUSG00000045954	Cavin2	caveolae associated 2 [Source:MGI Symbol;Acc:MGI:99513]	1	1.93149	0.00928988	0.261391	11.161	21.5694
ENSMUSG00000034902	Pip5k1c	phosphatidylinositol-4-phosphate 5-kinase, type 1 gamma [Source:MGI Symbol;Acc:MGI:1298224]	10	-1.78424	0.00930551	0.261391	12.7682	7.15041
ENSMUSG00000018920	Cxcl16	chemokine (C-X-C motif) ligand 16 [Source:MGI Symbol;Acc:MGI:1932682]	11	2.41618	0.00937275	0.262467	1.53934	3.73272
ENSMUSG00000030281	Il17rc	interleukin 17 receptor C [Source:MGI Symbol;Acc:MGI:2159336]	6	1.97098	0.00937741	0.262467	3.0479	6.01853
ENSMUSG00000027254	Map1a	microtubule-associated protein 1 A [Source:MGI Symbol;Acc:MGI:1306776]	2	-1.796	0.00940864	0.26287	10.5558	5.87551
ENSMUSG00000042182	Bend6	BEN domain containing 6 [Source:MGI Symbol;Acc:MGI:2444572]	1	-2.67268	0.00948957	0.264382	3.90705	1.44933
ENSMUSG00000050751	Pgbd5	piggyBac transposable element derived 5 [Source:MGI Symbol;Acc:MGI:2429955]	8	-3.11708	0.00949662	0.264382	5.71171	1.81964
ENSMUSG00000029524	Sirt4	sirtuin 4 [Source:MGI Symbol;Acc:MGI:1922637]	5	-2.05723	0.00962264	0.267414	6.29102	3.05012
ENSMUSG00000023439	Gnb3	guanine nucleotide binding protein (G protein), beta 3 [Source:MGI Symbol;Acc:MGI:95785]	6	-2.24568	0.00964917	0.267674	28.5646	12.6995
ENSMUSG00000039728	Slc6a5	solute carrier family 6 (neurotransmitter transporter, glycine), member 5 [Source:MGI Symbol;Acc:MGI:105090]	7	-3.43578	0.00968876	0.267902	0.788	0.225348
ENSMUSG00000054728	Phactr1	phosphatase and actin regulator 1 [Source:MGI Symbol;Acc:MGI:2659021]	13	-1.95491	0.00969168	0.267902	7.12435	3.64164
ENSMUSG00000045776	Lrtm1	leucine-rich repeats and transmembrane domains 1 [Source:MGI Symbol;Acc:MGI:2442106]	14	-3.38076	0.00971768	0.268043	6.98458	2.05963
ENSMUSG00000033722	BC034090	cDNA sequence BC034090 [Source:MGI Symbol;Acc:MGI:2672904]	1	-1.63449	0.00973111	0.268043	8.87439	5.4364
ENSMUSG00000029053	Prkcz	protein kinase C, zeta [Source:MGI Symbol;Acc:MGI:97602]	4	-1.98558	0.00976258	0.268086	6.69329	3.36593
ENSMUSG00000035513	Ntng2	netrin G2 [Source:MGI Symbol;Acc:MGI:2159341]	2	-1.79476	0.0097739	0.268086	15.9463	8.87911
ENSMUSG00000006585	Cdt1	chromatin licensing and DNA replication factor 1 [Source:MGI Symbol;Acc:MGI:1914427]	8	2.19744	0.00978417	0.268086	1.80001	3.94634
ENSMUSG00000032101	Ddx25	DEAD box helicase 25 [Source:MGI Symbol;Acc:MGI:1353582]	9	-3.76644	0.0098405	0.269004	1.54191	0.404302
ENSMUSG00000099974	Bcl2a1d	B cell leukemia/lymphoma 2 related protein A1d [Source:MGI Symbol;Acc:MGI:1278325]	9	6.52936	0.00985211	0.269004	0.224135	1.59686
ENSMUSG00000107881	Gm44250	predicted gene, 44250 [Source:MGI Symbol;Acc:MGI:5690642]	6	2.03084	0.00999596	0.272412	1.42467	2.892
ENSMUSG00000050965	Prkca	protein kinase C, alpha [Source:MGI Symbol;Acc:MGI:97595]	11	-2.00589	0.0100118	0.272412	17.5012	8.71964
ENSMUSG00000026639	Lamb3	laminin, beta 3 [Source:MGI Symbol;Acc:MGI:99915]	1	3.52866	0.0100385	0.272507	0.125023	0.445671
ENSMUSG00000021994	Wnt5a	wingless-type MMTV integration site family, member 5A [Source:MGI Symbol;Acc:MGI:98958]	14	2.00567	0.0100502	0.272507	1.81176	3.63927
ENSMUSG00000008540	Mgst1	microsomal glutathione S-transferase 1 [Source:MGI Symbol;Acc:MGI:1913850]	6	1.80752	0.0101274	0.274124	7.20086	12.9909
ENSMUSG00000022765	Snap29	synaptosomal-associated protein 29 [Source:MGI Symbol;Acc:MGI:1914724]	16	1.93135	0.0101904	0.275353	3.07757	5.95999
ENSMUSG00000028661	Epha8	Eph receptor A8 [Source:MGI Symbol;Acc:MGI:109378]	4	-4.21615	0.010216	0.275567	4.02798	0.947162
ENSMUSG00000020070	Rufy2	RUN and FYVE domain-containing 2 [Source:MGI Symbol;Acc:MGI:1917682]	10	-1.73284	0.0102948	0.277215	4.33897	2.50239
ENSMUSG00000035697	Arhgap45	Rho GTPase activating protein 45 [Source:MGI Symbol;Acc:MGI:1917969]	10	4.14173	0.0103502	0.278226	0.182183	0.771898
ENSMUSG00000070683	Lactbl1	lactamase, beta-like 1 [Source:MGI Symbol;Acc:MGI:2448566]	4	-3.30615	0.0105159	0.282195	22.1827	6.69559
ENSMUSG00000051146	Camk2n2	calcium/calmodulin-dependent protein kinase II inhibitor 2 [Source:MGI Symbol;Acc:MGI:1920297]	16	-3.58174	0.0105539	0.282583	5.62939	1.55109
ENSMUSG00000029712	Actl6b	actin-like 6B [Source:MGI Symbol;Acc:MGI:1933548]	5	-4.50477	0.0105666	0.282583	1.14031	0.244182
ENSMUSG00000033152	Podxl2	podocalyxin-like 2 [Source:MGI Symbol;Acc:MGI:2442488]	6	1.73494	0.010592	0.28278	13.1166	22.7667
ENSMUSG00000038067	Csf3	colony stimulating factor 3 (granulocyte) [Source:MGI Symbol;Acc:MGI:1339751]	11	3.45321	0.0106182	0.282994	8.4106	29.0577
ENSMUSG00000021340	Gpld1	glycosylphosphatidylinositol specific phospholipase D1 [Source:MGI Symbol;Acc:MGI:106604]	13	-2.62143	0.0106816	0.283875	2.07289	0.781376
ENSMUSG00000044749	Abca6	ATP-binding cassette, sub-family A (ABC1), member 6 [Source:MGI Symbol;Acc:MGI:1923434]	11	-2.45002	0.0106876	0.283875	0.729379	0.293433
ENSMUSG00000023087	Noct	nocturnin [Source:MGI Symbol;Acc:MGI:109382]	3	-2.05941	0.0107284	0.284141	24.8181	12.0481
ENSMUSG00000030350	Prmt8	protein arginine N-methyltransferase 8 [Source:MGI Symbol;Acc:MGI:3043083]	6	-3.81835	0.0107455	0.284141	1.89467	0.482221
ENSMUSG00000024042	Sik1	salt inducible kinase 1 [Source:MGI Symbol;Acc:MGI:104754]	17	-1.62177	0.0107522	0.284141	29.4089	18.1364
ENSMUSG00000097048	1600020E01Rik	RIKEN cDNA 1600020E01 gene [Source:MGI Symbol;Acc:MGI:1919262]	6	-1.8771	0.0107915	0.2847	6.24872	3.31847
ENSMUSG00000063286	Gvin-ps7	GTPase, very large interferon inducible, pseudogene 7 [Source:MGI Symbol;Acc:MGI:3644223]	7	3.61859	0.010841	0.285523	0.0919105	0.340211
ENSMUSG00000032356	Rasgrf1	RAS protein-specific guanine nucleotide-releasing factor 1 [Source:MGI Symbol;Acc:MGI:99694]	9	-1.64075	0.0109248	0.287106	4.55198	2.77302
ENSMUSG00000039059	Hrh3	histamine receptor H3 [Source:MGI Symbol;Acc:MGI:2139279]	2	-3.25489	0.0109379	0.287106	1.969	0.59847
ENSMUSG00000028546	Elavl4	ELAV like RNA binding protein 4 [Source:MGI Symbol;Acc:MGI:107427]	4	-4.08561	0.0110185	0.288625	0.675932	0.158636
ENSMUSG00000025352	Gdf11	growth differentiation factor 11 [Source:MGI Symbol;Acc:MGI:1338027]	10	1.75225	0.0110501	0.288625	7.63354	13.3805
ENSMUSG00000020464	Pnpt1	polyribonucleotide nucleotidyltransferase 1 [Source:MGI Symbol;Acc:MGI:1918951]	11	1.64131	0.0110512	0.288625	5.53886	9.10282
ENSMUSG00000034402	Kcnh5	potassium voltage-gated channel, subfamily H (eag-related), member 5 [Source:MGI Symbol;Acc:MGI:3584508]	12	-2.87033	0.0110797	0.288876	5.16554	1.78939
ENSMUSG00000026527	Rgs7	regulator of G protein signaling 7 [Source:MGI Symbol;Acc:MGI:1346089]	1	-2.31479	0.0110978	0.288876	2.92389	1.26015
ENSMUSG00000015342	Xk	X-linked Kx blood group [Source:MGI Symbol;Acc:MGI:103569]	X	2.85171	0.0111339	0.289334	0.380217	1.08447
ENSMUSG00000107728	Gm38910	predicted gene, 38910 [Source:MGI Symbol;Acc:MGI:5621795]	6	4.16584	0.011167	0.28971	0.16588	0.696981
ENSMUSG00000056752	Dnah9	dynein, axonemal, heavy chain 9 [Source:MGI Symbol;Acc:MGI:1289279]	11	-1.91543	0.0112128	0.290417	2.35763	1.22908
ENSMUSG00000033910	Gucy1a1	guanylate cyclase 1, soluble, alpha 1 [Source:MGI Symbol;Acc:MGI:1926562]	3	-3.40738	0.0112655	0.2913	4.84626	1.41534
ENSMUSG00000056073	Grik2	glutamate receptor, ionotropic, kainate 2 (beta 2) [Source:MGI Symbol;Acc:MGI:95815]	10	-3.7042	0.0113037	0.291741	0.844929	0.225805
ENSMUSG00000033965	Slc16a2	solute carrier family 16 (monocarboxylic acid transporters), member 2 [Source:MGI Symbol;Acc:MGI:1203732]	X	2.25447	0.0113368	0.291741	2.6946	6.07957
ENSMUSG00000053693	Mast1	microtubule associated serine/threonine kinase 1 [Source:MGI Symbol;Acc:MGI:1861901]	8	-2.27814	0.0113386	0.291741	7.38133	3.2321
ENSMUSG00000034891	Sncb	synuclein, beta [Source:MGI Symbol;Acc:MGI:1889011]	13	-2.74381	0.0113822	0.292162	58.6837	21.3663
ENSMUSG00000039485	Tspyl4	TSPY-like 4 [Source:MGI Symbol;Acc:MGI:106393]	10	-2.056	0.0114047	0.292162	18.4798	8.97604
ENSMUSG00000003410	Elavl3	ELAV like RNA binding protein 3 [Source:MGI Symbol;Acc:MGI:109157]	9	-3.32084	0.0114394	0.292162	3.33004	0.995748
ENSMUSG00000026519	Tmem63a	transmembrane protein 63a [Source:MGI Symbol;Acc:MGI:2384789]	1	2.27478	0.0114688	0.292162	0.976865	2.2307
ENSMUSG00000100334	C230024C17Rik	RIKEN cDNA C230024C17 gene [Source:MGI Symbol;Acc:MGI:5439413]	1	-5.93971	0.0114872	0.292162	0.603793	0.0935478
ENSMUSG00000007653	Gabrb2	gamma-aminobutyric acid (GABA) A receptor, subunit beta 2 [Source:MGI Symbol;Acc:MGI:95620]	11	-3.20165	0.0114999	0.292162	0.986625	0.303514
ENSMUSG00000054423	Cadps	Ca2+-dependent secretion activator [Source:MGI Symbol;Acc:MGI:1350922]	14	-3.22167	0.0115061	0.292162	7.52657	2.33309
ENSMUSG00000049288	Lix1l	Lix1-like [Source:MGI Symbol;Acc:MGI:3036267]	3	1.63616	0.0115144	0.292162	5.93562	9.71922
ENSMUSG00000042734	Ttc9	tetratricopeptide repeat domain 9 [Source:MGI Symbol;Acc:MGI:1916730]	12	-5.11465	0.0115235	0.292162	2.46944	0.475243
ENSMUSG00000022580	Rhpn1	rhophilin, Rho GTPase binding protein 1 [Source:MGI Symbol;Acc:MGI:1098783]	15	-2.01246	0.0115421	0.292162	5.12662	2.53623
ENSMUSG00000038026	Kcnj9	potassium inwardly-rectifying channel, subfamily J, member 9 [Source:MGI Symbol;Acc:MGI:108007]	1	-3.42429	0.011579	0.292623	5.32448	1.54702
ENSMUSG00000066258	Trim12a	tripartite motif-containing 12A [Source:MGI Symbol;Acc:MGI:1923931]	7	2.07627	0.0116392	0.293164	1.05913	2.20676
ENSMUSG00000101122	Gm17971	predicted gene, 17971 [Source:MGI Symbol;Acc:MGI:5010156]	1	3.10453	0.0116423	0.293164	2.58894	8.11514
ENSMUSG00000033386	Frrs1	ferric-chelate reductase 1 [Source:MGI Symbol;Acc:MGI:108076]	3	2.43255	0.0116567	0.293164	0.455724	1.10863
ENSMUSG00000045994	B3gat1	beta-1,3-glucuronyltransferase 1 (glucuronosyltransferase P) [Source:MGI Symbol;Acc:MGI:1924148]	9	-2.05674	0.0116977	0.293722	3.38895	1.6388
ENSMUSG00000024339	Tap2	transporter 2, ATP-binding cassette, sub-family B (MDR/TAP) [Source:MGI Symbol;Acc:MGI:98484]	17	1.68858	0.0117345	0.294172	3.81298	6.42925
ENSMUSG00000017740	Slc12a5	solute carrier family 12, member 5 [Source:MGI Symbol;Acc:MGI:1862037]	2	-2.4369	0.0117994	0.294905	38.9545	15.9782
ENSMUSG00000057596	Trim30d	tripartite motif-containing 30D [Source:MGI Symbol;Acc:MGI:3035181]	7	2.61558	0.0118145	0.294905	0.273468	0.717678
ENSMUSG00000026904	Slc4a10	solute carrier family 4, sodium bicarbonate cotransporter-like, member 10 [Source:MGI Symbol;Acc:MGI:2150150]	2	-3.72604	0.0118204	0.294905	6.7568	1.80649
ENSMUSG00000030206	Gsg1	germ cell associated 1 [Source:MGI Symbol;Acc:MGI:1194499]	6	-4.36934	0.0118451	0.295039	3.60898	0.803512
ENSMUSG00000008855	Hdac5	histone deacetylase 5 [Source:MGI Symbol;Acc:MGI:1333784]	11	-1.71066	0.0118635	0.295039	15.5999	9.11471
ENSMUSG00000025978	Rftn2	raftlin family member 2 [Source:MGI Symbol;Acc:MGI:1921263]	1	-4.46797	0.0119355	0.296357	0.472603	0.106142
ENSMUSG00000048978	Nrsn1	neurensin 1 [Source:MGI Symbol;Acc:MGI:894662]	13	-3.06476	0.0120018	0.297359	3.82993	1.23478
ENSMUSG00000044519	Zfp488	zinc finger protein 488 [Source:MGI Symbol;Acc:MGI:2686052]	14	-6.33956	0.0120139	0.297359	0.756588	0.112011
ENSMUSG00000036790	Slitrk2	SLIT and NTRK-like family, member 2 [Source:MGI Symbol;Acc:MGI:2679449]	X	-2.90129	0.0120479	0.297419	2.20363	0.753246
ENSMUSG00000113409	Gm8288	predicted gene 8288 [Source:MGI Symbol;Acc:MGI:3645459]	13	3.93138	0.0120544	0.297419	0.555302	2.25424
ENSMUSG00000025355	Mmp19	matrix metallopeptidase 19 [Source:MGI Symbol;Acc:MGI:1927899]	10	2.69661	0.0121168	0.298486	0.806792	2.1668
ENSMUSG00000018865	Sult4a1	sulfotransferase family 4A, member 1 [Source:MGI Symbol;Acc:MGI:1888971]	15	-3.63491	0.0121443	0.298692	3.76023	1.02068
ENSMUSG00000046768	Rhoj	ras homolog family member J [Source:MGI Symbol;Acc:MGI:1931551]	12	2.27103	0.0122151	0.299961	4.53038	10.2953
ENSMUSG00000036949	Slc39a12	solute carrier family 39 (zinc transporter), member 12 [Source:MGI Symbol;Acc:MGI:2139274]	2	1.82131	0.0122441	0.300201	4.43812	8.08997
ENSMUSG00000032368	Zic1	zinc finger protein of the cerebellum 1 [Source:MGI Symbol;Acc:MGI:106683]	9	2.4165	0.0122712	0.300395	1.68315	4.08075
ENSMUSG00000115207	Gm49132	predicted gene, 49132 [Source:MGI Symbol;Acc:MGI:6118542]	14	-3.20212	0.0123639	0.30175	2.11124	0.656162
ENSMUSG00000040276	Pacsin1	protein kinase C and casein kinase substrate in neurons 1 [Source:MGI Symbol;Acc:MGI:1345181]	17	-2.27425	0.0123716	0.30175	24.6089	10.8121
ENSMUSG00000098040	Gm20757	predicted gene, 20757 [Source:MGI Symbol;Acc:MGI:5434113]	10	3.25689	0.0123871	0.30175	0.469633	1.55161
ENSMUSG00000033720	Sfxn5	sideroflexin 5 [Source:MGI Symbol;Acc:MGI:2137681]	6	-1.99126	0.0124177	0.30175	3.46365	1.73477
ENSMUSG00000005045	Chd5	chromodomain helicase DNA binding protein 5 [Source:MGI Symbol;Acc:MGI:3036258]	4	-1.71842	0.0124407	0.30175	7.59404	4.41638
ENSMUSG00000064210	Ano6	anoctamin 6 [Source:MGI Symbol;Acc:MGI:2145890]	15	1.66202	0.0124425	0.30175	3.12039	5.1807
ENSMUSG00000037904	Ankrd9	ankyrin repeat domain 9 [Source:MGI Symbol;Acc:MGI:1921501]	12	1.98579	0.0124953	0.302167	2.26371	4.50441
ENSMUSG00000038276	Asic3	acid-sensing (proton-gated) ion channel 3 [Source:MGI Symbol;Acc:MGI:2159339]	5	-3.55896	0.0124984	0.302167	3.44792	0.951869
ENSMUSG00000020723	Cacng4	calcium channel, voltage-dependent, gamma subunit 4 [Source:MGI Symbol;Acc:MGI:1859167]	11	-2.07402	0.0125912	0.30394	8.33922	4.01544
ENSMUSG00000027220	Syt13	synaptotagmin XIII [Source:MGI Symbol;Acc:MGI:1933945]	2	-4.38085	0.0126329	0.304477	4.81048	1.08755
ENSMUSG00000039191	Rbpj	recombination signal binding protein for immunoglobulin kappa J region [Source:MGI Symbol;Acc:MGI:96522]	5	1.6258	0.0126657	0.304797	2.47939	4.03143
ENSMUSG00000019194	Scn1b	sodium channel, voltage-gated, type I, beta [Source:MGI Symbol;Acc:MGI:98247]	7	-2.70267	0.0127679	0.306621	3.6208	1.32024
ENSMUSG00000060240	Cend1	cell cycle exit and neuronal differentiation 1 [Source:MGI Symbol;Acc:MGI:1929898]	7	-4.02719	0.0127808	0.306621	6.72627	1.65418
ENSMUSG00000069874	Irgm2	immunity-related GTPase family M member 2 [Source:MGI Symbol;Acc:MGI:1926262]	11	2.39718	0.0128358	0.307157	1.851	4.4253
ENSMUSG00000030110	Ret	ret proto-oncogene [Source:MGI Symbol;Acc:MGI:97902]	6	-3.63934	0.0128587	0.307157	2.63648	0.71857
ENSMUSG00000026971	Itgb6	integrin beta 6 [Source:MGI Symbol;Acc:MGI:96615]	2	4.40326	0.0128735	0.307157	0.0445371	0.196699
ENSMUSG00000000197	Nalcn	sodium leak channel, non-selective [Source:MGI Symbol;Acc:MGI:2444306]	14	-3.29557	0.0128997	0.307157	1.29898	0.390872
ENSMUSG00000045838	Ccdc9b	coiled-coil domain containing 9B [Source:MGI Symbol;Acc:MGI:2685199]	2	1.79014	0.0129168	0.307157	3.1806	5.69106
ENSMUSG00000092083	Kcnb2	potassium voltage gated channel, Shab-related subfamily, member 2 [Source:MGI Symbol;Acc:MGI:99632]	1	-1.98733	0.012934	0.307157	0.869856	0.435388
ENSMUSG00000027313	Chac1	ChaC, cation transport regulator 1 [Source:MGI Symbol;Acc:MGI:1916315]	2	6.55122	0.0129408	0.307157	0.708716	4.68126
ENSMUSG00000038665	Dgki	diacylglycerol kinase, iota [Source:MGI Symbol;Acc:MGI:2443430]	6	-2.93079	0.0130014	0.308127	3.11221	1.05573
ENSMUSG00000038473	Nos1ap	nitric oxide synthase 1 (neuronal) adaptor protein [Source:MGI Symbol;Acc:MGI:1917979]	1	1.7424	0.0130392	0.308358	3.76344	6.56629
ENSMUSG00000055172	C1ra	complement component 1, r subcomponent A [Source:MGI Symbol;Acc:MGI:1355313]	6	2.20307	0.0130671	0.308358	1.59547	3.53792
ENSMUSG00000030310	Slc6a1	solute carrier family 6 (neurotransmitter transporter, GABA), member 1 [Source:MGI Symbol;Acc:MGI:95627]	6	-3.95319	0.0130704	0.308358	9.55435	2.41203
ENSMUSG00000016200	Syt14	synaptotagmin XIV [Source:MGI Symbol;Acc:MGI:2444490]	1	-1.63264	0.0131517	0.309361	4.09119	2.50383
ENSMUSG00000043279	Trim56	tripartite motif-containing 56 [Source:MGI Symbol;Acc:MGI:2685298]	5	1.84946	0.0131525	0.309361	6.73714	12.4534
ENSMUSG00000040139	9430038I01Rik	RIKEN cDNA 9430038I01 gene [Source:MGI Symbol;Acc:MGI:1924502]	7	2.66468	0.0132477	0.310963	0.254234	0.682239
ENSMUSG00000029309	Sparcl1	SPARC-like 1 [Source:MGI Symbol;Acc:MGI:108110]	5	-2.79349	0.0132604	0.310963	22.5185	8.04527
ENSMUSG00000025207	Sema4g	sema domain, immunoglobulin domain (Ig), transmembrane domain (TM) and short cytoplasmic domain, (semaphorin) 4G [Source:MGI Symbol;Acc:MGI:1347047]	19	-3.13456	0.0133014	0.31107	1.90994	0.604559
ENSMUSG00000017756	Slc12a7	solute carrier family 12, member 7 [Source:MGI Symbol;Acc:MGI:1342283]	13	1.64103	0.0133048	0.31107	1.76024	2.89206
ENSMUSG00000024164	C3	complement component 3 [Source:MGI Symbol;Acc:MGI:88227]	17	3.95607	0.0133321	0.311243	0.910997	3.61447
ENSMUSG00000056116	H2-T22	histocompatibility 2, T region locus 22 [Source:MGI Symbol;Acc:MGI:95956]	17	2.54942	0.0134416	0.312975	0.441459	1.12636
ENSMUSG00000104378	Gm37510	predicted gene, 37510 [Source:MGI Symbol;Acc:MGI:5610738]	1	-3.69063	0.0134508	0.312975	0.458561	0.125755
ENSMUSG00000045589	Frrs1l	ferric-chelate reductase 1 like [Source:MGI Symbol;Acc:MGI:2442704]	4	-3.69173	0.0134665	0.312975	2.57659	0.691701
ENSMUSG00000004187	Kifc2	kinesin family member C2 [Source:MGI Symbol;Acc:MGI:109187]	15	-1.81808	0.0135155	0.313648	6.64483	3.65868
ENSMUSG00000025283	Sat1	spermidine/spermine N1-acetyl transferase 1 [Source:MGI Symbol;Acc:MGI:98233]	X	1.58063	0.0136034	0.315194	24.6016	38.8856
ENSMUSG00000030401	Rtn2	reticulon 2 (Z-band associated protein) [Source:MGI Symbol;Acc:MGI:107612]	7	-2.33677	0.0136225	0.315194	3.49959	1.49352
ENSMUSG00000064293	Cntn4	contactin 4 [Source:MGI Symbol;Acc:MGI:1095737]	6	-2.56659	0.0136449	0.315246	3.2879	1.27542
ENSMUSG00000022762	Ncam2	neural cell adhesion molecule 2 [Source:MGI Symbol;Acc:MGI:97282]	16	-5.28572	0.0137368	0.316685	1.58134	0.296091
ENSMUSG00000069072	Slc7a14	solute carrier family 7 (cationic amino acid transporter, y+ system), member 14 [Source:MGI Symbol;Acc:MGI:3040688]	3	-3.07982	0.0137477	0.316685	1.53706	0.494099
ENSMUSG00000053550	Shisa7	shisa family member 7 [Source:MGI Symbol;Acc:MGI:3605641]	7	-2.54233	0.0137847	0.317068	1.03004	0.402336
ENSMUSG00000031328	Flna	filamin, alpha [Source:MGI Symbol;Acc:MGI:95556]	X	1.55331	0.0138596	0.317952	41.7411	64.8346
ENSMUSG00000073530	Pappa2	pappalysin 2 [Source:MGI Symbol;Acc:MGI:3051647]	1	-2.38808	0.0138638	0.317952	0.609414	0.25193
ENSMUSG00000109529	Gm44801	predicted gene 44801 [Source:MGI Symbol;Acc:MGI:5753377]	8	-4.6927	0.0139249	0.318883	1.42285	0.289963
ENSMUSG00000006800	Sulf2	sulfatase 2 [Source:MGI Symbol;Acc:MGI:1919293]	2	-2.48612	0.014006	0.320273	3.69049	1.47658
ENSMUSG00000022935	Grik1	glutamate receptor, ionotropic, kainate 1 [Source:MGI Symbol;Acc:MGI:95814]	16	-2.57636	0.0140848	0.32154	3.93323	1.5198
ENSMUSG00000030559	Rab38	RAB38, member RAS oncogene family [Source:MGI Symbol;Acc:MGI:1919683]	7	2.29178	0.0141381	0.32154	1.89946	4.38463
ENSMUSG00000037434	Slc30a1	solute carrier family 30 (zinc transporter), member 1 [Source:MGI Symbol;Acc:MGI:1345281]	1	-1.65075	0.0141442	0.32154	10.5084	6.36178
ENSMUSG00000041757	Plekha6	pleckstrin homology domain containing, family A member 6 [Source:MGI Symbol;Acc:MGI:2388662]	1	-1.98176	0.0141604	0.32154	7.76158	3.91336
ENSMUSG00000012819	Cdh23	cadherin 23 (otocadherin) [Source:MGI Symbol;Acc:MGI:1890219]	10	-2.63484	0.0141644	0.32154	0.159669	0.060097
ENSMUSG00000007950	Abhd8	abhydrolase domain containing 8 [Source:MGI Symbol;Acc:MGI:1918946]	8	-1.57542	0.0142103	0.321622	12.4614	7.91784
ENSMUSG00000050334	C130071C03Rik	RIKEN cDNA C130071C03 gene [Source:MGI Symbol;Acc:MGI:2443574]	13	-2.6707	0.0142246	0.321622	1.68833	0.624557
ENSMUSG00000032177	Pde4a	phosphodiesterase 4A, cAMP specific [Source:MGI Symbol;Acc:MGI:99558]	9	-2.64761	0.0142604	0.321622	1.47834	0.552922
ENSMUSG00000110246	C130073E24Rik	RIKEN cDNA C130073E24 gene [Source:MGI Symbol;Acc:MGI:2442759]	8	-2.39333	0.0142772	0.321622	0.587103	0.244171
ENSMUSG00000033419	Snap91	synaptosomal-associated protein 91 [Source:MGI Symbol;Acc:MGI:109132]	9	-1.96779	0.014287	0.321622	10.3781	5.26858
ENSMUSG00000028927	Padi2	peptidyl arginine deiminase, type II [Source:MGI Symbol;Acc:MGI:1338892]	4	-2.11119	0.0142983	0.321622	3.2741	1.54284
ENSMUSG00000009035	Tmem184b	transmembrane protein 184b [Source:MGI Symbol;Acc:MGI:2445179]	15	1.49598	0.0143121	0.321622	12.7494	19.076
ENSMUSG00000027577	Chrna4	cholinergic receptor, nicotinic, alpha polypeptide 4 [Source:MGI Symbol;Acc:MGI:87888]	2	-2.51388	0.0143682	0.322418	1.53746	0.609682
ENSMUSG00000053091	Lins1	lines homolog 1 [Source:MGI Symbol;Acc:MGI:1919885]	7	1.96359	0.0143965	0.322589	0.678488	1.33394
ENSMUSG00000056174	Col8a2	collagen, type VIII, alpha 2 [Source:MGI Symbol;Acc:MGI:88464]	4	2.08416	0.0144513	0.322928	2.11413	4.41503
ENSMUSG00000110424	1700012D14Rik	RIKEN cDNA 1700012D14 gene [Source:MGI Symbol;Acc:MGI:1922729]	7	-2.36492	0.014453	0.322928	1.16394	0.489375
ENSMUSG00000032131	Abcg4	ATP binding cassette subfamily G member 4 [Source:MGI Symbol;Acc:MGI:1890594]	9	-1.86984	0.0146099	0.325193	6.66396	3.55798
ENSMUSG00000004791	Pgf	placental growth factor [Source:MGI Symbol;Acc:MGI:105095]	12	2.07719	0.0146232	0.325193	1.44304	3.00218
ENSMUSG00000028626	Col9a2	collagen, type IX, alpha 2 [Source:MGI Symbol;Acc:MGI:88466]	4	1.9356	0.0146533	0.325193	6.22807	12.0751
ENSMUSG00000044636	Csrnp2	cysteine-serine-rich nuclear protein 2 [Source:MGI Symbol;Acc:MGI:2386852]	15	-1.7379	0.014705	0.325193	4.18536	2.39994
ENSMUSG00000025468	Caly	calcyon neuron-specific vesicular protein [Source:MGI Symbol;Acc:MGI:1915816]	7	-3.5548	0.0147051	0.325193	5.40105	1.50828
ENSMUSG00000007891	Ctsd	cathepsin D [Source:MGI Symbol;Acc:MGI:88562]	7	1.48136	0.0147282	0.325193	30.8682	45.7329
ENSMUSG00000050677	Ccdc96	coiled-coil domain containing 96 [Source:MGI Symbol;Acc:MGI:1913967]	5	-2.51816	0.0147351	0.325193	1.39969	0.548376
ENSMUSG00000024778	Fas	Fas (TNF receptor superfamily member 6) [Source:MGI Symbol;Acc:MGI:95484]	19	1.72451	0.014771	0.325193	10.8107	18.6132
ENSMUSG00000038323	1700066M21Rik	RIKEN cDNA 1700066M21 gene [Source:MGI Symbol;Acc:MGI:1920717]	1	-2.82683	0.0147922	0.325193	1.5505	0.548068
ENSMUSG00000116809	A630036G19Rik	RIKEN cDNA A630036G19 gene [Source:MGI Symbol;Acc:MGI:2442979]	16	-3.28338	0.0148014	0.325193	0.66655	0.203205
ENSMUSG00000000078	Klf6	Kruppel-like factor 6 [Source:MGI Symbol;Acc:MGI:1346318]	13	2.01721	0.0148038	0.325193	63.3472	127.784
ENSMUSG00000066687	Zbtb16	zinc finger and BTB domain containing 16 [Source:MGI Symbol;Acc:MGI:103222]	9	2.02507	0.0148454	0.325193	1.65564	3.36651
ENSMUSG00000026163	Sphkap	SPHK1 interactor, AKAP domain containing [Source:MGI Symbol;Acc:MGI:1924879]	1	-3.36087	0.0148729	0.325193	10.3992	3.08935
ENSMUSG00000110161	Gm45494	predicted gene 45494 [Source:MGI Symbol;Acc:MGI:5791330]	9	3.25291	0.0148777	0.325193	1.593	5.16795
ENSMUSG00000020282	Rhbdf1	rhomboid 5 homolog 1 [Source:MGI Symbol;Acc:MGI:104328]	11	1.58398	0.014892	0.325193	5.22687	8.28207
ENSMUSG00000119584	Rn18s	18S ribosomal RNA [Source:NCBI gene (formerly Entrezgene);Acc:19791]	17	1.60057	0.0149008	0.325193	39.4705	63.2179
ENSMUSG00000048078	Tenm4	teneurin transmembrane protein 4 [Source:MGI Symbol;Acc:MGI:2447063]	7	1.66302	0.0149083	0.325193	6.24259	10.385
ENSMUSG00000071369	Map3k5	mitogen-activated protein kinase kinase kinase 5 [Source:MGI Symbol;Acc:MGI:1346876]	10	1.51527	0.0149786	0.32627	9.10596	13.7963
ENSMUSG00000005338	Cadm3	cell adhesion molecule 3 [Source:MGI Symbol;Acc:MGI:2137858]	1	-3.12251	0.015048	0.326853	10.327	3.30012
ENSMUSG00000028463	Car9	carbonic anhydrase 9 [Source:MGI Symbol;Acc:MGI:2447188]	4	2.07651	0.0150528	0.326853	2.20322	4.59042
ENSMUSG00000038354	Ankrd35	ankyrin repeat domain 35 [Source:MGI Symbol;Acc:MGI:2442590]	3	-2.30777	0.0150681	0.326853	0.843724	0.363177
ENSMUSG00000028459	Cd72	CD72 antigen [Source:MGI Symbol;Acc:MGI:88345]	4	3.37345	0.0151573	0.328036	0.243132	0.837586
ENSMUSG00000021067	Sav1	salvador family WW domain containing 1 [Source:MGI Symbol;Acc:MGI:1927144]	12	1.61973	0.0151771	0.328036	8.00571	12.9681
ENSMUSG00000114210	A330084C13Rik	RIKEN cDNA A330084C13 gene [Source:MGI Symbol;Acc:MGI:2685802]	18	4.16286	0.015231	0.328036	0.0913631	0.381697
ENSMUSG00000078202	Nrarp	Notch-regulated ankyrin repeat protein [Source:MGI Symbol;Acc:MGI:1914372]	2	-3.20313	0.0152723	0.328036	1.06602	0.318005
ENSMUSG00000068373	D430041D05Rik	RIKEN cDNA D430041D05 gene [Source:MGI Symbol;Acc:MGI:2181743]	2	-3.94708	0.0153031	0.328036	0.414324	0.102847
ENSMUSG00000060961	Slc4a4	solute carrier family 4 (anion exchanger), member 4 [Source:MGI Symbol;Acc:MGI:1927555]	5	1.71745	0.0153152	0.328036	7.5876	13.0318
ENSMUSG00000022415	Syngr1	synaptogyrin 1 [Source:MGI Symbol;Acc:MGI:1328323]	15	-1.93384	0.0153237	0.328036	12.7855	6.60177
ENSMUSG00000022105	Rb1	RB transcriptional corepressor 1 [Source:MGI Symbol;Acc:MGI:97874]	14	-1.68208	0.0153305	0.328036	6.99562	4.14838
ENSMUSG00000021594	Srd5a1	steroid 5 alpha-reductase 1 [Source:MGI Symbol;Acc:MGI:98400]	13	-2.97965	0.0153324	0.328036	0.950335	0.311936
ENSMUSG00000091191	Gm17334	predicted gene, 17334 [Source:MGI Symbol;Acc:MGI:4936968]	11	5.25848	0.0153514	0.328036	0.363922	1.94543
ENSMUSG00000025318	Jph3	junctophilin 3 [Source:MGI Symbol;Acc:MGI:1891497]	8	-3.4078	0.0153537	0.328036	2.03827	0.590467
ENSMUSG00000037605	Adgrl3	adhesion G protein-coupled receptor L3 [Source:MGI Symbol;Acc:MGI:2441950]	5	-2.1544	0.0154403	0.328959	2.21059	1.02339
ENSMUSG00000022623	Shank3	SH3 and multiple ankyrin repeat domains 3 [Source:MGI Symbol;Acc:MGI:1930016]	15	-2.35586	0.015472	0.328959	1.50882	0.639343
ENSMUSG00000045733	Sprn	shadow of prion protein [Source:MGI Symbol;Acc:MGI:3582583]	7	-4.44311	0.015474	0.328959	1.07737	0.234286
ENSMUSG00000036528	Ppfibp2	PTPRF interacting protein, binding protein 2 (liprin beta 2) [Source:MGI Symbol;Acc:MGI:894649]	7	1.73142	0.0154812	0.328959	1.37747	2.38863
ENSMUSG00000047085	Lrrc4b	leucine rich repeat containing 4B [Source:MGI Symbol;Acc:MGI:3027390]	7	-3.69436	0.0155495	0.32959	5.56274	1.49037
ENSMUSG00000035283	Adrb1	adrenergic receptor, beta 1 [Source:MGI Symbol;Acc:MGI:87937]	19	-2.34412	0.0155531	0.32959	4.37174	1.85588
ENSMUSG00000042978	Sbk1	SH3-binding kinase 1 [Source:MGI Symbol;Acc:MGI:2135937]	7	-2.12432	0.0156698	0.330583	10.8878	5.12146
ENSMUSG00000039395	Mreg	melanoregulin [Source:MGI Symbol;Acc:MGI:2151839]	1	-2.30585	0.0156917	0.330583	10.9305	4.71818
ENSMUSG00000040631	Dok4	docking protein 4 [Source:MGI Symbol;Acc:MGI:2148865]	8	1.70483	0.0157127	0.330583	3.15045	5.37877
ENSMUSG00000100210	H3c7	H3 clustered histone 7 [Source:MGI Symbol;Acc:MGI:2448329]	13	-3.40069	0.0157279	0.330583	2.08746	0.60777
ENSMUSG00000040687	Madd	MAP-kinase activating death domain [Source:MGI Symbol;Acc:MGI:2444672]	2	-2.02152	0.0157282	0.330583	27.4288	13.5629
ENSMUSG00000023885	Thbs2	thrombospondin 2 [Source:MGI Symbol;Acc:MGI:98738]	17	2.19272	0.015733	0.330583	0.421783	0.925825
ENSMUSG00000021318	Gli3	GLI-Kruppel family member GLI3 [Source:MGI Symbol;Acc:MGI:95729]	13	1.64746	0.0157481	0.330583	3.5161	5.79566
ENSMUSG00000107115	Gm43052	predicted gene 43052 [Source:MGI Symbol;Acc:MGI:5663189]	5	-2.79997	0.0158207	0.331661	1.20881	0.434006
ENSMUSG00000073158	9030624G23Rik	RIKEN cDNA 9030624G23 gene [Source:MGI Symbol;Acc:MGI:1914058]	12	-2.32811	0.0158897	0.332423	3.30274	1.43133
ENSMUSG00000034780	B3galt1	UDP-Gal:betaGlcNAc beta 1,3-galactosyltransferase, polypeptide 1 [Source:MGI Symbol;Acc:MGI:1349403]	2	-2.67229	0.0159157	0.332423	1.64653	0.607812
ENSMUSG00000068566	Myadm	myeloid-associated differentiation marker [Source:MGI Symbol;Acc:MGI:1355332]	7	1.971	0.0159248	0.332423	1.27667	2.51307
ENSMUSG00000072847	A530017D24Rik	RIKEN cDNA A530017D24 gene [Source:MGI Symbol;Acc:MGI:2144320]	11	-2.04081	0.0159422	0.332423	2.80975	1.36845
ENSMUSG00000036867	Smad6	SMAD family member 6 [Source:MGI Symbol;Acc:MGI:1336883]	9	2.8615	0.015973	0.332621	2.38091	6.82592
ENSMUSG00000024008	Cpne5	copine V [Source:MGI Symbol;Acc:MGI:2385908]	17	-3.65779	0.0160463	0.333368	0.43139	0.11635
ENSMUSG00000026825	Dnm1	dynamin 1 [Source:MGI Symbol;Acc:MGI:107384]	2	-2.06858	0.0160515	0.333368	42.9125	20.7356
ENSMUSG00000073557	Ppp1r12b	protein phosphatase 1, regulatory subunit 12B [Source:MGI Symbol;Acc:MGI:1916417]	1	-1.54105	0.0160974	0.333655	5.74329	3.72721
ENSMUSG00000010751	Tnfrsf22	tumor necrosis factor receptor superfamily, member 22 [Source:MGI Symbol;Acc:MGI:1930270]	7	2.52411	0.016108	0.333655	0.847322	2.14279
ENSMUSG00000026787	Gad2	glutamic acid decarboxylase 2 [Source:MGI Symbol;Acc:MGI:95634]	2	-5.6365	0.0161861	0.334828	3.33445	0.585698
ENSMUSG00000024109	Nrxn1	neurexin I [Source:MGI Symbol;Acc:MGI:1096391]	17	-2.40294	0.0163004	0.33655	1.46305	0.606722
ENSMUSG00000056708	Ier5	immediate early response 5 [Source:MGI Symbol;Acc:MGI:1337072]	1	-1.95863	0.0163125	0.33655	56.9222	29.0568
ENSMUSG00000103624	Gm3081	predicted gene 3081 [Source:MGI Symbol;Acc:MGI:3781258]	9	-2.6741	0.0163694	0.337279	0.991739	0.373072
ENSMUSG00000114503	Gm20242	predicted gene, 20242 [Source:MGI Symbol;Acc:MGI:5012427]	14	-3.18006	0.0164062	0.337592	1.47057	0.454674
ENSMUSG00000041120	Nbl1	NBL1, DAN family BMP antagonist [Source:MGI Symbol;Acc:MGI:104591]	4	1.49373	0.0165212	0.338781	44.0672	65.8165
ENSMUSG00000109719	Gm45266	predicted gene 45266 [Source:MGI Symbol;Acc:MGI:5791102]	8	2.19488	0.0165251	0.338781	2.50964	5.52056
ENSMUSG00000022365	Derl1	Der1-like domain family, member 1 [Source:MGI Symbol;Acc:MGI:1915069]	15	1.54664	0.0165291	0.338781	8.82328	13.6345
ENSMUSG00000013921	Clip3	CAP-GLY domain containing linker protein 3 [Source:MGI Symbol;Acc:MGI:1923936]	7	-1.48633	0.016573	0.339236	39.7739	26.7551
ENSMUSG00000047415	Gpr68	G protein-coupled receptor 68 [Source:MGI Symbol;Acc:MGI:2441763]	12	3.03346	0.016625	0.339855	0.126305	0.388435
ENSMUSG00000042258	Isl1	ISL1 transcription factor, LIM/homeodomain [Source:MGI Symbol;Acc:MGI:101791]	13	-3.1583	0.0166479	0.339878	3.97766	1.25024
ENSMUSG00000040478	Prdm13	PR domain containing 13 [Source:MGI Symbol;Acc:MGI:2448528]	4	-3.16129	0.0167133	0.340418	2.12037	0.661278
ENSMUSG00000000632	Sez6	seizure related gene 6 [Source:MGI Symbol;Acc:MGI:104745]	11	-2.92969	0.0167422	0.340418	5.55226	1.88861
ENSMUSG00000056592	Zfp658	zinc finger protein 658 [Source:MGI Symbol;Acc:MGI:2652821]	7	-2.35626	0.0167558	0.340418	1.69795	0.71857
ENSMUSG00000062937	Mtap	methylthioadenosine phosphorylase [Source:MGI Symbol;Acc:MGI:1914152]	4	1.81147	0.0167615	0.340418	8.25247	14.9464
ENSMUSG00000072572	Slc39a2	solute carrier family 39 (zinc transporter), member 2 [Source:MGI Symbol;Acc:MGI:2684326]	14	-3.5843	0.0168099	0.340957	0.623219	0.176864
ENSMUSG00000041544	Disp3	dispatched RND transporter family member 3 [Source:MGI Symbol;Acc:MGI:2444403]	4	-2.88049	0.0169105	0.342554	1.59172	0.545266
ENSMUSG00000035024	Ncapd3	non-SMC condensin II complex, subunit D3 [Source:MGI Symbol;Acc:MGI:2142989]	9	-1.51274	0.0169396	0.342698	6.55482	4.33604
ENSMUSG00000008999	Bmp7	bone morphogenetic protein 7 [Source:MGI Symbol;Acc:MGI:103302]	2	1.70351	0.0169849	0.34317	16.2199	27.639
ENSMUSG00000030237	Slco1a4	solute carrier organic anion transporter family, member 1a4 [Source:MGI Symbol;Acc:MGI:1351896]	6	-3.14337	0.017024	0.34348	0.380414	0.117588
ENSMUSG00000067780	Pi15	peptidase inhibitor 15 [Source:MGI Symbol;Acc:MGI:1934659]	1	2.85241	0.0170442	0.34348	0.187723	0.534668
ENSMUSG00000022773	Ypel1	yippee like 1 [Source:MGI Symbol;Acc:MGI:1913303]	16	3.0347	0.0171003	0.344166	0.157017	0.485242
ENSMUSG00000002831	Plin4	perilipin 4 [Source:MGI Symbol;Acc:MGI:1929709]	17	2.52159	0.0171257	0.344233	1.09244	2.76388
ENSMUSG00000068615	Gjd2	gap junction protein, delta 2 [Source:MGI Symbol;Acc:MGI:1334209]	2	-2.43179	0.0171731	0.344342	6.55451	2.67786
ENSMUSG00000102461	Gm37166	predicted gene, 37166 [Source:MGI Symbol;Acc:MGI:5610394]	9	-4.1664	0.0171752	0.344342	1.41235	0.344967
ENSMUSG00000022766	Serpind1	serine (or cysteine) peptidase inhibitor, clade D, member 1 [Source:MGI Symbol;Acc:MGI:96051]	16	2.13802	0.0172057	0.344512	3.38517	7.22872
ENSMUSG00000034265	Zdhhc14	zinc finger, DHHC domain containing 14 [Source:MGI Symbol;Acc:MGI:2653229]	17	1.63915	0.0172469	0.344894	7.06639	11.5645
ENSMUSG00000057914	Cacnb2	calcium channel, voltage-dependent, beta 2 subunit [Source:MGI Symbol;Acc:MGI:894644]	2	-1.86655	0.0173422	0.346356	8.48541	4.54237
ENSMUSG00000022416	Cacna1i	calcium channel, voltage-dependent, alpha 1I subunit [Source:MGI Symbol;Acc:MGI:2178051]	15	-1.68455	0.0173879	0.346776	2.96185	1.75536
ENSMUSG00000029513	Prkab1	protein kinase, AMP-activated, beta 1 non-catalytic subunit [Source:MGI Symbol;Acc:MGI:1336167]	5	-1.70628	0.0174076	0.346776	22.1334	12.9594
ENSMUSG00000037437	Adam32	a disintegrin and metallopeptidase domain 32 [Source:MGI Symbol;Acc:MGI:2653822]	8	-2.77973	0.0174567	0.347162	1.32064	0.463952
ENSMUSG00000034187	Nsf	N-ethylmaleimide sensitive fusion protein [Source:MGI Symbol;Acc:MGI:104560]	11	-2.04363	0.0174715	0.347162	22.0424	10.7794
ENSMUSG00000047143	Dmrta2	doublesex and mab-3 related transcription factor like family A2 [Source:MGI Symbol;Acc:MGI:2653629]	4	1.91224	0.0175634	0.348545	8.6478	16.5484
ENSMUSG00000027831	Veph1	ventricular zone expressed PH domain-containing 1 [Source:MGI Symbol;Acc:MGI:1920039]	3	1.967	0.0176221	0.348642	0.538502	1.06561
ENSMUSG00000021239	Vsx2	visual system homeobox 2 [Source:MGI Symbol;Acc:MGI:88401]	12	-1.86147	0.0176568	0.348642	16.6575	8.94882
ENSMUSG00002076237			6	-4.30223	0.0176697	0.348642	7.91338	1.77254
ENSMUSG00000039519	Cyp7b1	cytochrome P450, family 7, subfamily b, polypeptide 1 [Source:MGI Symbol;Acc:MGI:104978]	3	2.97476	0.0176715	0.348642	0.584714	1.74378
ENSMUSG00000030095	Tmem43	transmembrane protein 43 [Source:MGI Symbol;Acc:MGI:1921372]	6	1.8393	0.0176799	0.348642	5.4533	10.0171
ENSMUSG00000020052	Ascl1	achaete-scute family bHLH transcription factor 1 [Source:MGI Symbol;Acc:MGI:96919]	10	2.87937	0.0177044	0.348681	1.08428	3.13006
ENSMUSG00000053199	Arhgap20	Rho GTPase activating protein 20 [Source:MGI Symbol;Acc:MGI:2445175]	9	-2.59233	0.0177265	0.348681	0.713927	0.271962
ENSMUSG00000000093	Tbx2	T-box 2 [Source:MGI Symbol;Acc:MGI:98494]	11	-1.90256	0.0178089	0.349561	7.48561	3.92927
ENSMUSG00000056185	Snx32	sorting nexin 32 [Source:MGI Symbol;Acc:MGI:2444704]	19	-1.84726	0.017816	0.349561	3.86678	2.09218
ENSMUSG00000039716	Dock3	dedicator of cyto-kinesis 3 [Source:MGI Symbol;Acc:MGI:2429763]	9	-2.6499	0.0178449	0.349689	2.27641	0.855909
ENSMUSG00000057143	Trim12c	tripartite motif-containing 12C [Source:MGI Symbol;Acc:MGI:4821183]	7	1.98128	0.0178866	0.350067	1.47151	2.93005
ENSMUSG00000030443	Zfp583	zinc finger protein 583 [Source:MGI Symbol;Acc:MGI:2682297]	7	-4.24804	0.0180733	0.353135	0.801131	0.178759
ENSMUSG00000004630	Pcp2	Purkinje cell protein 2 (L7) [Source:MGI Symbol;Acc:MGI:97508]	8	-3.43428	0.0181077	0.353135	8.56593	2.47025
ENSMUSG00000006575	Rundc3a	RUN domain containing 3A [Source:MGI Symbol;Acc:MGI:1858752]	11	-2.14685	0.0181136	0.353135	15.2641	7.09364
ENSMUSG00000022462	Slc38a2	solute carrier family 38, member 2 [Source:MGI Symbol;Acc:MGI:1915010]	15	1.88659	0.0181645	0.353135	26.3751	49.7621
ENSMUSG00000047180	Neurl3	neuralized E3 ubiquitin protein ligase 3 [Source:MGI Symbol;Acc:MGI:2429944]	1	3.33637	0.0181824	0.353135	0.444933	1.49765
ENSMUSG00000003279	Dlgap1	DLG associated protein 1 [Source:MGI Symbol;Acc:MGI:1346065]	17	-2.42853	0.0182322	0.353135	1.62049	0.665133
ENSMUSG00000018899	Irf1	interferon regulatory factor 1 [Source:MGI Symbol;Acc:MGI:96590]	11	3.64026	0.0182424	0.353135	17.2538	62.8229
ENSMUSG00000036564	Ndrg4	N-myc downstream regulated gene 4 [Source:MGI Symbol;Acc:MGI:2384590]	8	-2.60171	0.0182878	0.353135	9.08866	3.48302
ENSMUSG00000058897	Col25a1	collagen, type XXV, alpha 1 [Source:MGI Symbol;Acc:MGI:1924268]	3	-3.12812	0.0182884	0.353135	0.450831	0.141812
ENSMUSG00000047842	Diras2	DIRAS family, GTP-binding RAS-like 2 [Source:MGI Symbol;Acc:MGI:1915453]	13	-3.49348	0.0183119	0.353135	14.1108	4.02943
ENSMUSG00000049076	Acap2	ArfGAP with coiled-coil, ankyrin repeat and PH domains 2 [Source:MGI Symbol;Acc:MGI:1925868]	16	1.46159	0.0183238	0.353135	8.76127	12.8037
ENSMUSG00000070476	Fam217b	family with sequence similarity 217, member B [Source:MGI Symbol;Acc:MGI:1918782]	2	-2.35981	0.0183251	0.353135	1.41977	0.600794
ENSMUSG00000023367	Tmem176a	transmembrane protein 176A [Source:MGI Symbol;Acc:MGI:1913308]	6	1.58077	0.0183373	0.353135	4.54452	7.17914
ENSMUSG00000090223	Pcp4	Purkinje cell protein 4 [Source:MGI Symbol;Acc:MGI:97509]	16	2.69428	0.0184161	0.354215	0.60902	1.66625
ENSMUSG00000031089	Slc6a14	solute carrier family 6 (neurotransmitter transporter), member 14 [Source:MGI Symbol;Acc:MGI:1890216]	X	6.09851	0.0184569	0.354563	0.219134	1.3465
ENSMUSG00000017943	Gdap1l1	ganglioside-induced differentiation-associated protein 1-like 1 [Source:MGI Symbol;Acc:MGI:2385163]	2	-2.36435	0.0185324	0.355165	5.17837	2.18081
ENSMUSG00000055491	Pprc1	peroxisome proliferative activated receptor, gamma, coactivator-related 1 [Source:MGI Symbol;Acc:MGI:2385096]	19	1.56221	0.0185403	0.355165	9.68837	15.1328
ENSMUSG00000019082	Slc25a22	solute carrier family 25 (mitochondrial carrier, glutamate), member 22 [Source:MGI Symbol;Acc:MGI:1915517]	7	-2.05079	0.0185565	0.355165	6.77428	3.29627
ENSMUSG00000048015	Neurod4	neurogenic differentiation 4 [Source:MGI Symbol;Acc:MGI:108055]	10	-4.45	0.0186043	0.355644	10.6198	2.3748
ENSMUSG00000031351	Zfp185	zinc finger protein 185 [Source:MGI Symbol;Acc:MGI:108095]	X	1.56659	0.0186759	0.356231	11.4377	17.9187
ENSMUSG00000048277	Syngr2	synaptogyrin 2 [Source:MGI Symbol;Acc:MGI:1328324]	11	1.77192	0.0186806	0.356231	6.25372	11.0788
ENSMUSG00000097354	2310001H17Rik	RIKEN cDNA 2310001H17 gene [Source:MGI Symbol;Acc:MGI:1923682]	6	3.642	0.0187768	0.357453	0.263566	0.96818
ENSMUSG00000046876	Atxn1	ataxin 1 [Source:MGI Symbol;Acc:MGI:104783]	13	-1.86693	0.0187904	0.357453	9.22599	4.93852
ENSMUSG00000074802	Gas2l3	growth arrest-specific 2 like 3 [Source:MGI Symbol;Acc:MGI:1918780]	10	2.86733	0.0188424	0.358005	2.68629	7.69716
ENSMUSG00000025272	Tro	trophinin [Source:MGI Symbol;Acc:MGI:1928994]	X	-2.05153	0.018889	0.358455	3.11617	1.51241
ENSMUSG00000020340	Cyfip2	cytoplasmic FMR1 interacting protein 2 [Source:MGI Symbol;Acc:MGI:1924134]	11	-1.69417	0.0189374	0.35859	24.9716	14.733
ENSMUSG00000033306	Lpp	LIM domain containing preferred translocation partner in lipoma [Source:MGI Symbol;Acc:MGI:2441849]	16	1.49937	0.0189718	0.35859	2.44489	3.66395
ENSMUSG00000050910	Cdr2l	cerebellar degeneration-related protein 2-like [Source:MGI Symbol;Acc:MGI:2684867]	11	-1.65985	0.0189829	0.35859	14.165	8.53308
ENSMUSG00000045246	Kcng4	potassium voltage-gated channel, subfamily G, member 4 [Source:MGI Symbol;Acc:MGI:1913983]	8	-2.59949	0.018988	0.35859	1.76596	0.6718
ENSMUSG00000021337	Scgn	secretagogin, EF-hand calcium binding protein [Source:MGI Symbol;Acc:MGI:2384873]	13	-2.74406	0.0190815	0.359488	5.36265	1.93691
ENSMUSG00000026275	Ppp1r7	protein phosphatase 1, regulatory subunit 7 [Source:MGI Symbol;Acc:MGI:1913635]	1	-1.67219	0.019099	0.359488	4.55463	2.72
ENSMUSG00000037552	Plekhg2	pleckstrin homology domain containing, family G (with RhoGef domain) member 2 [Source:MGI Symbol;Acc:MGI:2141874]	7	1.52879	0.0191045	0.359488	7.21185	11.0287
ENSMUSG00000070880	Gad1	glutamate decarboxylase 1 [Source:MGI Symbol;Acc:MGI:95632]	2	-4.86852	0.0191284	0.359503	6.88512	1.40978
ENSMUSG00000032589	Bsn	bassoon [Source:MGI Symbol;Acc:MGI:1277955]	9	-2.47379	0.0191649	0.359606	8.64013	3.48978
ENSMUSG00000046204	Pnma2	paraneoplastic antigen MA2 [Source:MGI Symbol;Acc:MGI:2444129]	14	-4.75193	0.0191799	0.359606	0.265661	0.0504433
ENSMUSG00000041073	Nacad	NAC alpha domain containing [Source:MGI Symbol;Acc:MGI:3603030]	11	-2.34806	0.0192611	0.360184	5.76313	2.44393
ENSMUSG00000021203	Otub2	OTU domain, ubiquitin aldehyde binding 2 [Source:MGI Symbol;Acc:MGI:1915399]	12	-2.42464	0.0192656	0.360184	2.10849	0.864131
ENSMUSG00000052544	St6galnac3	ST6 (alpha-N-acetyl-neuraminyl-2,3-beta-galactosyl-1,3)-N-acetylgalactosaminide alpha-2,6-sialyltransferase 3 [Source:MGI Symbol;Acc:MGI:1341828]	3	2.23771	0.019298	0.360184	0.230288	0.519372
ENSMUSG00000032244	Fem1b	fem 1 homolog b [Source:MGI Symbol;Acc:MGI:1335087]	9	-1.69258	0.019303	0.360184	23.8799	14.0995
ENSMUSG00000101365	Gm19325	predicted gene, 19325 [Source:MGI Symbol;Acc:MGI:5011510]	9	-2.74482	0.0193441	0.360343	0.646111	0.234836
ENSMUSG00000028970	Abcb1b	ATP-binding cassette, sub-family B (MDR/TAP), member 1B [Source:MGI Symbol;Acc:MGI:97568]	5	1.74466	0.0193576	0.360343	2.02781	3.54217
ENSMUSG00000049100	Pcdh10	protocadherin 10 [Source:MGI Symbol;Acc:MGI:1338042]	3	-2.19292	0.019419	0.361055	1.51378	0.688237
ENSMUSG00000022305	Lrp12	low density lipoprotein-related protein 12 [Source:MGI Symbol;Acc:MGI:2443132]	15	1.64047	0.0194507	0.361214	12.9872	21.3025
ENSMUSG00000042759	Apobr	apolipoprotein B receptor [Source:MGI Symbol;Acc:MGI:2176230]	7	2.84568	0.0194987	0.361676	0.343348	0.979311
ENSMUSG00000029419	Ajm1	apical junction component 1 [Source:MGI Symbol;Acc:MGI:2685842]	2	-2.29317	0.0195916	0.362734	2.15149	0.934133
ENSMUSG00000039419	Cntnap2	contactin associated protein-like 2 [Source:MGI Symbol;Acc:MGI:1914047]	6	-1.72211	0.0196022	0.362734	3.01626	1.74991
ENSMUSG00000032691	Nlrp3	NLR family, pyrin domain containing 3 [Source:MGI Symbol;Acc:MGI:2653833]	11	3.7614	0.0196523	0.363231	0.184131	0.711114
ENSMUSG00000033855	Ston1	stonin 1 [Source:MGI Symbol;Acc:MGI:1924307]	17	2.16801	0.0197023	0.363283	1.85742	4.02807
ENSMUSG00000054074	Skida1	SKI/DACH domain containing 1 [Source:MGI Symbol;Acc:MGI:1919918]	2	-1.9732	0.0197077	0.363283	4.95872	2.50294
ENSMUSG00000003746	Man1a	mannosidase 1, alpha [Source:MGI Symbol;Acc:MGI:104677]	10	1.794	0.0197249	0.363283	0.863763	1.54998
ENSMUSG00000036053	Fmnl2	formin-like 2 [Source:MGI Symbol;Acc:MGI:1918659]	2	1.65488	0.0197691	0.363314	14.0675	23.2743
ENSMUSG00000032000	Birc3	baculoviral IAP repeat-containing 3 [Source:MGI Symbol;Acc:MGI:1197007]	9	1.73425	0.0198283	0.363314	6.01563	10.4379
ENSMUSG00000037747	Phyhipl	phytanoyl-CoA hydroxylase interacting protein-like [Source:MGI Symbol;Acc:MGI:1918161]	10	-2.87965	0.0198527	0.363314	3.53177	1.22169
ENSMUSG00000066058	Cldn19	claudin 19 [Source:MGI Symbol;Acc:MGI:3033992]	4	2.16686	0.0198639	0.363314	1.1158	2.43281
ENSMUSG00000079067	Hmgn2-ps1	high mobility group nucleosomal binding domain 2, pseudogene 1 [Source:MGI Symbol;Acc:MGI:3783162]	5	-2.99881	0.0198813	0.363314	7.7638	2.56534
ENSMUSG00000053519	Kcnip1	Kv channel-interacting protein 1 [Source:MGI Symbol;Acc:MGI:1917607]	11	-2.28097	0.0198816	0.363314	1.08799	0.47435
ENSMUSG00000031491	Chrna6	cholinergic receptor, nicotinic, alpha polypeptide 6 [Source:MGI Symbol;Acc:MGI:106213]	8	-3.62766	0.0198894	0.363314	3.48291	0.947219
ENSMUSG00000030513	Pcsk6	proprotein convertase subtilisin/kexin type 6 [Source:MGI Symbol;Acc:MGI:102897]	7	-2.63508	0.019944	0.363886	1.85845	0.695874
ENSMUSG00000031490	Eif4ebp1	eukaryotic translation initiation factor 4E binding protein 1 [Source:MGI Symbol;Acc:MGI:103267]	8	2.76428	0.0200282	0.364833	2.39049	6.59013
ENSMUSG00000119132	U4	U4 spliceosomal RNA [Source:RFAM;Acc:RF00015]	5	-2.81943	0.0200427	0.364833	19.613	6.86569
ENSMUSG00000029581	Fscn1	fascin actin-bundling protein 1 [Source:MGI Symbol;Acc:MGI:1352745]	5	-2.38206	0.0201434	0.365266	8.09835	3.38444
ENSMUSG00000030302	Atp2b2	ATPase, Ca++ transporting, plasma membrane 2 [Source:MGI Symbol;Acc:MGI:105368]	6	-2.19463	0.0201445	0.365266	5.79572	2.63682
ENSMUSG00000025576	Rbfox3	RNA binding protein, fox-1 homolog (C. elegans) 3 [Source:MGI Symbol;Acc:MGI:106368]	11	-2.80582	0.0201723	0.365266	1.05105	0.369786
ENSMUSG00000072875	Gpr27	G protein-coupled receptor 27 [Source:MGI Symbol;Acc:MGI:1202299]	6	2.08094	0.0201776	0.365266	1.34309	2.78811
ENSMUSG00000048027	Rgmb	repulsive guidance molecule family member B [Source:MGI Symbol;Acc:MGI:1916049]	17	1.65322	0.0201834	0.365266	3.79634	6.28194
ENSMUSG00000063919	Srrm4	serine/arginine repetitive matrix 4 [Source:MGI Symbol;Acc:MGI:1916205]	5	-2.13144	0.020267	0.366355	6.50354	3.04485
ENSMUSG00000022512	Cldn1	claudin 1 [Source:MGI Symbol;Acc:MGI:1276109]	16	3.14027	0.0203302	0.367071	1.64011	5.15897
ENSMUSG00000097462	9530026P05Rik	RIKEN cDNA 9530026P05 gene [Source:MGI Symbol;Acc:MGI:1924659]	6	2.7026	0.0203734	0.367427	0.244122	0.667597
ENSMUSG00000058975	Kcnc1	potassium voltage gated channel, Shaw-related subfamily, member 1 [Source:MGI Symbol;Acc:MGI:96667]	7	-2.70607	0.0204151	0.367754	4.72548	1.74241
ENSMUSG00000025900	Rp1	retinitis pigmentosa 1 (human) [Source:MGI Symbol;Acc:MGI:1341105]	1	-2.09835	0.0204462	0.367891	74.5413	35.5192
ENSMUSG00000020260	Pofut2	protein O-fucosyltransferase 2 [Source:MGI Symbol;Acc:MGI:1916863]	10	1.49834	0.0205706	0.368676	3.09954	4.64468
ENSMUSG00000069793	Slfn9	schlafen 9 [Source:MGI Symbol;Acc:MGI:2445121]	11	2.02198	0.0205871	0.368676	0.68861	1.39187
ENSMUSG00000040412	Elapor1	endosome-lysosome associated apoptosis and autophagy regulator 1 [Source:MGI Symbol;Acc:MGI:1923930]	3	-3.74143	0.0206151	0.368676	0.645885	0.168808
ENSMUSG00000044528	Tram1l1	translocation associated membrane protein 1-like 1 [Source:MGI Symbol;Acc:MGI:2443503]	3	-2.24057	0.020651	0.368676	1.2309	0.550352
ENSMUSG00000057982	Zfp809	zinc finger protein 809 [Source:MGI Symbol;Acc:MGI:2143362]	9	1.93251	0.0206545	0.368676	1.80757	3.51112
ENSMUSG00000106547	B230303O12Rik	RIKEN cDNA B230303O12 gene [Source:MGI Symbol;Acc:MGI:2442644]	5	-2.18972	0.0206547	0.368676	1.97112	0.888474
ENSMUSG00000090061	Nwd2	NACHT and WD repeat domain containing 2 [Source:MGI Symbol;Acc:MGI:1920464]	5	-5.42321	0.0206551	0.368676	0.67921	0.122121
ENSMUSG00000032890	Rims3	regulating synaptic membrane exocytosis 3 [Source:MGI Symbol;Acc:MGI:2443331]	4	-2.83527	0.0207721	0.370342	2.7132	0.951693
ENSMUSG00000006731	B4galnt1	beta-1,4-N-acetyl-galactosaminyl transferase 1 [Source:MGI Symbol;Acc:MGI:1342057]	10	-2.15905	0.0208351	0.370453	1.48076	0.683409
ENSMUSG00000061911	Myt1l	myelin transcription factor 1-like [Source:MGI Symbol;Acc:MGI:1100511]	12	-3.76402	0.0208572	0.370453	2.15033	0.568434
ENSMUSG00000032586	Traip	TRAF-interacting protein [Source:MGI Symbol;Acc:MGI:1096377]	9	-3.29239	0.0208649	0.370453	0.857772	0.255458
ENSMUSG00000048696	Mex3d	mex3 RNA binding family member D [Source:MGI Symbol;Acc:MGI:2681847]	10	1.56539	0.0208733	0.370453	4.7954	7.51981
ENSMUSG00000079235	Ccdc13	coiled-coil domain containing 13 [Source:MGI Symbol;Acc:MGI:1920144]	9	3.04269	0.0209461	0.371324	0.150141	0.459488
ENSMUSG00000071753	Cdr1os	cerebellar degeneration related antigen 1, opposite strand [Source:MGI Symbol;Acc:MGI:5637821]	X	-2.25523	0.02101	0.372034	5.65803	2.50697
ENSMUSG00000041153	Osgin2	oxidative stress induced growth inhibitor family member 2 [Source:MGI Symbol;Acc:MGI:2384798]	4	1.74977	0.0211625	0.37431	3.66664	6.41524
ENSMUSG00000060798	Intu	inturned planar cell polarity protein [Source:MGI Symbol;Acc:MGI:2443752]	3	-1.64591	0.0212341	0.374971	2.04716	1.24192
ENSMUSG00000019256	Ahr	aryl-hydrocarbon receptor [Source:MGI Symbol;Acc:MGI:105043]	12	-2.20244	0.0213649	0.374971	15.0104	6.80755
ENSMUSG00000043019	Edem3	ER degradation enhancer, mannosidase alpha-like 3 [Source:MGI Symbol;Acc:MGI:1914217]	1	1.5238	0.0213661	0.374971	10.6546	16.2394
ENSMUSG00000044629	Cnrip1	cannabinoid receptor interacting protein 1 [Source:MGI Symbol;Acc:MGI:1917505]	11	-1.65125	0.0213728	0.374971	4.98562	3.02023
ENSMUSG00000049556	Lingo1	leucine rich repeat and Ig domain containing 1 [Source:MGI Symbol;Acc:MGI:1915522]	9	-2.64257	0.0213984	0.374971	3.04973	1.1448
ENSMUSG00000046593	Tmem215	transmembrane protein 215 [Source:MGI Symbol;Acc:MGI:2444167]	4	-3.28167	0.02143	0.374971	1.88582	0.56508
ENSMUSG00000092060	Bend4	BEN domain containing 4 [Source:MGI Symbol;Acc:MGI:3648414]	5	-2.18316	0.0214487	0.374971	1.36697	0.621828
ENSMUSG00000019838	Slc16a10	solute carrier family 16 (monocarboxylic acid transporters), member 10 [Source:MGI Symbol;Acc:MGI:1919722]	10	2.49581	0.0214742	0.374971	0.260066	0.653586
ENSMUSG00000045009	Prrt3	proline-rich transmembrane protein 3 [Source:MGI Symbol;Acc:MGI:2444810]	6	-5.74072	0.0215064	0.374971	0.927697	0.154867
ENSMUSG00000101429	BC055402	cDNA sequence BC055402 [Source:MGI Symbol;Acc:MGI:3039597]	1	-5.64658	0.0215165	0.374971	1.00155	0.167962
ENSMUSG00000061928	Dsg1b	desmoglein 1 beta [Source:MGI Symbol;Acc:MGI:2664357]	18	4.01337	0.0215366	0.374971	0.19383	0.785615
ENSMUSG00000023341	Mx2	MX dynamin-like GTPase 2 [Source:MGI Symbol;Acc:MGI:97244]	16	2.50505	0.0215401	0.374971	1.59628	4.01757
ENSMUSG00000025790	Slco3a1	solute carrier organic anion transporter family, member 3a1 [Source:MGI Symbol;Acc:MGI:1351867]	7	1.77818	0.0216139	0.374971	1.07459	1.9149
ENSMUSG00000055567	Unc80	unc-80, NALCN activator [Source:MGI Symbol;Acc:MGI:2652882]	1	-2.22632	0.0216216	0.374971	14.7512	6.62238
ENSMUSG00000029598	Plbd2	phospholipase B domain containing 2 [Source:MGI Symbol;Acc:MGI:1919022]	5	1.48023	0.0216632	0.374971	5.54588	8.20766
ENSMUSG00000043398	Gpr135	G protein-coupled receptor 135 [Source:MGI Symbol;Acc:MGI:2676315]	12	-2.95587	0.0216883	0.374971	1.30648	0.443675
ENSMUSG00000031450	Grk1	G protein-coupled receptor kinase 1 [Source:MGI Symbol;Acc:MGI:1345146]	8	-1.97238	0.0217199	0.374971	83.3742	42.2653
ENSMUSG00000042567	Nek10	NIMA (never in mitosis gene a)- related kinase 10 [Source:MGI Symbol;Acc:MGI:2685128]	14	-3.63134	0.021783	0.374971	0.218061	0.0589684
ENSMUSG00000051747	Ttn	titin [Source:MGI Symbol;Acc:MGI:98864]	2	-2.88182	0.0217852	0.374971	0.22234	0.0769651
ENSMUSG00000028289	Epha7	Eph receptor A7 [Source:MGI Symbol;Acc:MGI:95276]	4	-2.64007	0.0218132	0.374971	1.29039	0.484176
ENSMUSG00000035566	Pcdh17	protocadherin 17 [Source:MGI Symbol;Acc:MGI:2684924]	14	-2.57939	0.0218233	0.374971	1.05544	0.405292
ENSMUSG00000118280	Gm41804	predicted gene, 41804 [Source:MGI Symbol;Acc:MGI:5624689]	19	-3.14963	0.0218274	0.374971	5.0104	1.53354
ENSMUSG00000118029		TEC	19	-4.38113	0.0218389	0.374971	0.649284	0.132642
ENSMUSG00000031637	Lrp2bp	Lrp2 binding protein [Source:MGI Symbol;Acc:MGI:1914870]	8	-3.2304	0.0218868	0.374971	0.646724	0.19373
ENSMUSG00000008932	Slc1a7	solute carrier family 1 (glutamate transporter), member 7 [Source:MGI Symbol;Acc:MGI:2444087]	4	-1.89796	0.0218964	0.374971	9.42508	4.95251
ENSMUSG00000095315	Gm10130	predicted gene 10130 [Source:MGI Symbol;Acc:MGI:3642547]	2	-3.01257	0.0219142	0.374971	1.47468	0.47906
ENSMUSG00000084989	Crocc2	ciliary rootlet coiled-coil, rootletin family member 2 [Source:MGI Symbol;Acc:MGI:3045962]	1	2.7586	0.0219309	0.374971	0.342733	0.954694
ENSMUSG00000037306	Man1c1	mannosidase, alpha, class 1C, member 1 [Source:MGI Symbol;Acc:MGI:2446214]	4	1.79459	0.0219455	0.374971	18.8564	33.8472
ENSMUSG00000021313	Ryr2	ryanodine receptor 2, cardiac [Source:MGI Symbol;Acc:MGI:99685]	13	-2.10945	0.0219682	0.374971	2.85575	1.35251
ENSMUSG00000020297	Nsg2	neuron specific gene family member 2 [Source:MGI Symbol;Acc:MGI:1202070]	11	-2.09659	0.0219838	0.374971	5.60302	2.65952
ENSMUSG00000027962	Vcam1	vascular cell adhesion molecule 1 [Source:MGI Symbol;Acc:MGI:98926]	3	5.03089	0.0219845	0.374971	2.51623	12.6624
ENSMUSG00000059742	Kcnh7	potassium voltage-gated channel, subfamily H (eag-related), member 7 [Source:MGI Symbol;Acc:MGI:2159566]	2	-4.14948	0.021994	0.374971	0.554337	0.131786
ENSMUSG00000052504	Epha3	Eph receptor A3 [Source:MGI Symbol;Acc:MGI:99612]	16	-2.5934	0.0219968	0.374971	0.47606	0.182419
ENSMUSG00000028294	Cfap206	cilia and flagella associated protein 206 [Source:MGI Symbol;Acc:MGI:1916579]	4	-2.8134	0.0220297	0.374971	1.53869	0.530258
ENSMUSG00000041329	Atp1b2	ATPase, Na+/K+ transporting, beta 2 polypeptide [Source:MGI Symbol;Acc:MGI:88109]	11	-1.96731	0.0220402	0.374971	102.331	52.0026
ENSMUSG00000021991	Cacna2d3	calcium channel, voltage-dependent, alpha2/delta subunit 3 [Source:MGI Symbol;Acc:MGI:1338890]	14	-2.66197	0.0220845	0.375076	1.9119	0.71312
ENSMUSG00000022212	Cpne6	copine VI [Source:MGI Symbol;Acc:MGI:1334445]	14	-5.21766	0.0220971	0.375076	1.33701	0.248948
ENSMUSG00000033854	Kcnk10	potassium channel, subfamily K, member 10 [Source:MGI Symbol;Acc:MGI:1919508]	12	-3.0402	0.0221327	0.375076	1.60451	0.523274
ENSMUSG00000031980	Agt	angiotensinogen (serpin peptidase inhibitor, clade A, member 8) [Source:MGI Symbol;Acc:MGI:87963]	8	-4.22961	0.0221424	0.375076	1.41958	0.317351
ENSMUSG00000029178	Klf3	Kruppel-like factor 3 (basic) [Source:MGI Symbol;Acc:MGI:1342773]	5	1.77789	0.0221954	0.375566	2.00127	3.55253
ENSMUSG00000018196	Glrx2	glutaredoxin 2 (thioltransferase) [Source:MGI Symbol;Acc:MGI:1916617]	1	-1.7128	0.0222778	0.376527	1.77527	1.03667
ENSMUSG00000000957	Mmp14	matrix metallopeptidase 14 (membrane-inserted) [Source:MGI Symbol;Acc:MGI:101900]	14	1.68325	0.0223147	0.376527	2.00747	3.38478
ENSMUSG00000021661	Ankra2	ankyrin repeat, family A (RFXANK-like), 2 [Source:MGI Symbol;Acc:MGI:1915808]	13	-1.84711	0.0223245	0.376527	2.56143	1.3838
ENSMUSG00000031925	Maml2	mastermind like transcriptional coactivator 2 [Source:MGI Symbol;Acc:MGI:2389460]	9	1.57477	0.0224225	0.377772	8.41859	13.2478
ENSMUSG00000033316	Galnt9	polypeptide N-acetylgalactosaminyltransferase 9 [Source:MGI Symbol;Acc:MGI:2677965]	5	-4.40631	0.0224793	0.378321	0.885929	0.190134
ENSMUSG00000055430	Nap1l5	nucleosome assembly protein 1-like 5 [Source:MGI Symbol;Acc:MGI:1923555]	6	-2.46199	0.0225287	0.378743	27.4776	11.1366
ENSMUSG00000024308	Tapbp	TAP binding protein [Source:MGI Symbol;Acc:MGI:1201689]	17	1.50679	0.0226865	0.379961	31.7306	47.806
ENSMUSG00000047747	Rnf150	ring finger protein 150 [Source:MGI Symbol;Acc:MGI:2443860]	8	-2.04372	0.0227145	0.379961	3.45994	1.69029
ENSMUSG00000050064	Zfp697	zinc finger protein 697 [Source:MGI Symbol;Acc:MGI:2139736]	3	1.90181	0.0227641	0.379961	4.01391	7.63966
ENSMUSG00000068205	Macrod2	mono-ADP ribosylhydrolase 2 [Source:MGI Symbol;Acc:MGI:1920149]	2	-1.78385	0.0227674	0.379961	2.31559	1.29644
ENSMUSG00000057716	Tmem178b	transmembrane protein 178B [Source:MGI Symbol;Acc:MGI:3647581]	6	-3.14759	0.0227876	0.379961	1.97267	0.623399
ENSMUSG00000034320	Slc26a2	solute carrier family 26 (sulfate transporter), member 2 [Source:MGI Symbol;Acc:MGI:892977]	18	-1.85351	0.0228098	0.379961	5.96687	3.21497
ENSMUSG00000039860	Srrm3	serine/arginine repetitive matrix 3 [Source:MGI Symbol;Acc:MGI:1920309]	5	-1.92379	0.022832	0.379961	9.5861	4.97737
ENSMUSG00000018427	Ypel2	yippee like 2 [Source:MGI Symbol;Acc:MGI:1925114]	11	-1.45373	0.0228328	0.379961	36.6902	25.2341
ENSMUSG00000040213	Kyat3	kynurenine aminotransferase 3 [Source:MGI Symbol;Acc:MGI:2677849]	3	-2.38444	0.0228589	0.379961	0.327889	0.13857
ENSMUSG00000040006	Ginm1	glycoprotein integral membrane 1 [Source:MGI Symbol;Acc:MGI:2384905]	10	1.61958	0.022865	0.379961	6.85513	11.0933
ENSMUSG00000020080	Hkdc1	hexokinase domain containing 1 [Source:MGI Symbol;Acc:MGI:2384910]	10	-3.1271	0.0228687	0.379961	1.64353	0.518863
ENSMUSG00000027457	Snph	syntaphilin [Source:MGI Symbol;Acc:MGI:2139270]	2	-2.36691	0.0229316	0.380294	3.22256	1.35495
ENSMUSG00000038633	Degs1	delta(4)-desaturase, sphingolipid 1 [Source:MGI Symbol;Acc:MGI:1097711]	1	1.52598	0.0229374	0.380294	11.7297	17.8778
ENSMUSG00000041649	Klf8	Kruppel-like factor 8 [Source:MGI Symbol;Acc:MGI:2442430]	X	3.12453	0.0229964	0.380867	0.130455	0.411528
ENSMUSG00000029334	Prkg2	protein kinase, cGMP-dependent, type II [Source:MGI Symbol;Acc:MGI:108173]	5	-5.98383	0.0230522	0.381387	0.479054	0.0745922
ENSMUSG00000051242	Pcdhb9	protocadherin beta 9 [Source:MGI Symbol;Acc:MGI:2136744]	18	-3.64753	0.0232122	0.383308	1.22043	0.327386
ENSMUSG00000034612	Chst11	carbohydrate sulfotransferase 11 [Source:MGI Symbol;Acc:MGI:1927166]	10	1.86854	0.0232174	0.383308	4.65846	8.69367
ENSMUSG00000032549	Rab6b	RAB6B, member RAS oncogene family [Source:MGI Symbol;Acc:MGI:107283]	9	-1.7672	0.0232906	0.384009	13.8266	7.81561
ENSMUSG00000087221	BC037032	cDNA Sequence BC037032 [Source:MGI Symbol;Acc:MGI:3040924]	15	-2.22288	0.023309	0.384009	0.865507	0.385622
ENSMUSG00000027215	Cd82	CD82 antigen [Source:MGI Symbol;Acc:MGI:104651]	2	1.61083	0.0233949	0.38497	12.5208	20.1474
ENSMUSG00000006219	Fblim1	filamin binding LIM protein 1 [Source:MGI Symbol;Acc:MGI:1921452]	4	2.37805	0.0234167	0.38497	0.394299	0.950049
ENSMUSG00000031521	Aga	aspartylglucosaminidase [Source:MGI Symbol;Acc:MGI:104873]	8	1.92383	0.0235159	0.385615	3.64345	7.00224
ENSMUSG00000030134	Rasgef1a	RasGEF domain family, member 1A [Source:MGI Symbol;Acc:MGI:1917977]	6	-2.90392	0.0235293	0.385615	1.97137	0.670775
ENSMUSG00000033715	Akr1c14	aldo-keto reductase family 1, member C14 [Source:MGI Symbol;Acc:MGI:2145458]	13	3.82125	0.02353	0.385615	0.146372	0.562368
ENSMUSG00000029054	Gabrd	gamma-aminobutyric acid (GABA) A receptor, subunit delta [Source:MGI Symbol;Acc:MGI:95622]	4	-4.96606	0.0235752	0.385699	0.935458	0.177475
ENSMUSG00000023034	Nr4a1	nuclear receptor subfamily 4, group A, member 1 [Source:MGI Symbol;Acc:MGI:1352454]	15	-1.66883	0.0236383	0.385699	75.6396	45.3291
ENSMUSG00000021464	Ror2	receptor tyrosine kinase-like orphan receptor 2 [Source:MGI Symbol;Acc:MGI:1347521]	13	2.41269	0.0236415	0.385699	0.327355	0.791503
ENSMUSG00000044724	Gpr152	G protein-coupled receptor 152 [Source:MGI Symbol;Acc:MGI:2685519]	19	-2.11917	0.023644	0.385699	8.51131	4.002
ENSMUSG00000048482	Bdnf	brain derived neurotrophic factor [Source:MGI Symbol;Acc:MGI:88145]	2	1.9467	0.0236699	0.385699	4.99759	9.72627
ENSMUSG00000020541	Tom1l1	target of myb1-like 1 (chicken) [Source:MGI Symbol;Acc:MGI:1919193]	11	1.93514	0.0236833	0.385699	3.85758	7.46096
ENSMUSG00000052133	Sema5b	sema domain, seven thrombospondin repeats (type 1 and type 1-like), transmembrane domain (TM) and short cytoplasmic domain, (semaphorin) 5B [Source:MGI Symbol;Acc:MGI:107555]	16	1.87933	0.0238189	0.387504	5.01666	9.43386
ENSMUSG00000112023	Lilr4b	leukocyte immunoglobulin-like receptor, subfamily B, member 4B [Source:MGI Symbol;Acc:MGI:102702]	10	2.31761	0.0238678	0.387895	0.282706	0.653738
ENSMUSG00000116033	Gm49442	predicted gene, 49442 [Source:MGI Symbol;Acc:MGI:6155088]	15	-3.09201	0.0239456	0.388755	1.15565	0.374579
ENSMUSG00000025515	Muc2	mucin 2 [Source:MGI Symbol;Acc:MGI:1339364]	7	-2.11473	0.0240312	0.389449	1.03889	0.492876
ENSMUSG00000096971	4930556M19Rik	RIKEN cDNA 4930556M19 gene [Source:MGI Symbol;Acc:MGI:1922509]	15	2.02541	0.0240382	0.389449	0.670794	1.36057
ENSMUSG00000004360	9330159F19Rik	RIKEN cDNA 9330159F19 gene [Source:MGI Symbol;Acc:MGI:3036239]	10	-3.67453	0.0240649	0.38945	1.16357	0.311097
ENSMUSG00000032020	Ubash3b	ubiquitin associated and SH3 domain containing, B [Source:MGI Symbol;Acc:MGI:1920078]	9	-1.73244	0.0240882	0.38945	2.15495	1.23846
ENSMUSG00000031142	Cacna1f	calcium channel, voltage-dependent, alpha 1F subunit [Source:MGI Symbol;Acc:MGI:1859639]	X	-1.91118	0.0241872	0.39056	15.7101	8.21518
ENSMUSG00000040606	Kazn	kazrin, periplakin interacting protein [Source:MGI Symbol;Acc:MGI:1918779]	4	1.5468	0.0242068	0.39056	3.54982	5.49674
ENSMUSG00000029361	Nos1	nitric oxide synthase 1, neuronal [Source:MGI Symbol;Acc:MGI:97360]	5	-2.99632	0.0243068	0.391769	0.44969	0.147025
ENSMUSG00000038393	Txnip	thioredoxin interacting protein [Source:MGI Symbol;Acc:MGI:1889549]	3	2.45548	0.0244246	0.392896	2.61282	6.44105
ENSMUSG00000023224	Serping1	serine (or cysteine) peptidase inhibitor, clade G, member 1 [Source:MGI Symbol;Acc:MGI:894696]	2	1.6042	0.024427	0.392896	18.5978	29.8204
ENSMUSG00000057969	Sema3b	sema domain, immunoglobulin domain (Ig), short basic domain, secreted, (semaphorin) 3B [Source:MGI Symbol;Acc:MGI:107561]	9	1.6006	0.0245733	0.394729	7.05703	11.2998
ENSMUSG00000023972	Ptk7	PTK7 protein tyrosine kinase 7 [Source:MGI Symbol;Acc:MGI:1918711]	17	1.665	0.0246108	0.394729	3.26445	5.44278
ENSMUSG00000023892	Zfp51	zinc finger protein 51 [Source:MGI Symbol;Acc:MGI:99198]	17	1.96134	0.0246169	0.394729	1.41647	2.77868
ENSMUSG00000031428	Zcchc18	zinc finger, CCHC domain containing 18 [Source:MGI Symbol;Acc:MGI:1914245]	X	-1.81791	0.0247104	0.39552	5.16322	2.83234
ENSMUSG00000101061	Platr1	pluripotency associated transcript 1 [Source:MGI Symbol;Acc:MGI:5580349]	1	-3.2418	0.024721	0.39552	0.349921	0.109437
ENSMUSG00000095304	Plac9a	placenta specific 9a [Source:MGI Symbol;Acc:MGI:2663998]	14	-4.28127	0.0247422	0.39552	1.96105	0.451577
ENSMUSG00000036885	Arhgef26	Rho guanine nucleotide exchange factor (GEF) 26 [Source:MGI Symbol;Acc:MGI:1918053]	3	-1.96095	0.0247877	0.395843	6.49022	3.30462
ENSMUSG00000110405	Gm45534	predicted gene 45534 [Source:MGI Symbol;Acc:MGI:5791370]	8	-2.6237	0.0248139	0.395856	1.26158	0.483399
ENSMUSG00000050370	Ch25h	cholesterol 25-hydroxylase [Source:MGI Symbol;Acc:MGI:1333869]	19	3.37002	0.0248602	0.396116	4.92898	16.6209
ENSMUSG00000031539	Ap3m2	adaptor-related protein complex 3, mu 2 subunit [Source:MGI Symbol;Acc:MGI:1929214]	8	-1.93636	0.0248809	0.396116	6.68333	3.45014
ENSMUSG00000021036	Sptlc2	serine palmitoyltransferase, long chain base subunit 2 [Source:MGI Symbol;Acc:MGI:108074]	12	1.48082	0.025001	0.397622	4.0278	5.9621
ENSMUSG00000037754	Ppp1r16b	protein phosphatase 1, regulatory subunit 16B [Source:MGI Symbol;Acc:MGI:2151841]	2	-2.29959	0.0250521	0.39803	1.42797	0.617039
ENSMUSG00000020601	Trib2	tribbles pseudokinase 2 [Source:MGI Symbol;Acc:MGI:2145021]	12	-1.86649	0.0250959	0.39831	16.3648	8.75446
ENSMUSG00000038777	Sema6c	sema domain, transmembrane domain (TM), and cytoplasmic domain, (semaphorin) 6C [Source:MGI Symbol;Acc:MGI:1338032]	3	-2.08353	0.0251207	0.39831	2.21915	1.06232
ENSMUSG00000026156	B3gat2	beta-1,3-glucuronyltransferase 2 (glucuronosyltransferase S) [Source:MGI Symbol;Acc:MGI:2389490]	1	-3.78056	0.025241	0.399811	0.597785	0.155499
ENSMUSG00000032041	Tirap	toll-interleukin 1 receptor (TIR) domain-containing adaptor protein [Source:MGI Symbol;Acc:MGI:2152213]	9	-1.70309	0.0252759	0.399958	2.34914	1.37738
ENSMUSG00000027419	Pcsk2	proprotein convertase subtilisin/kexin type 2 [Source:MGI Symbol;Acc:MGI:97512]	2	-2.19641	0.0254005	0.401405	0.893669	0.401729
ENSMUSG00000033569	Adgrb3	adhesion G protein-coupled receptor B3 [Source:MGI Symbol;Acc:MGI:2441837]	1	-2.88285	0.0254397	0.401405	1.81652	0.627561
ENSMUSG00000041923	Nol4	nucleolar protein 4 [Source:MGI Symbol;Acc:MGI:2441684]	18	-2.00064	0.0254658	0.401405	2.30271	1.14617
ENSMUSG00000044349	Snhg11	small nucleolar RNA host gene 11 [Source:MGI Symbol;Acc:MGI:2441845]	2	-2.68965	0.0254701	0.401405	11.9411	4.43498
ENSMUSG00000056856	Jakmip3	janus kinase and microtubule interacting protein 3 [Source:MGI Symbol;Acc:MGI:1921254]	7	-2.50067	0.0255437	0.402159	1.15688	0.458529
ENSMUSG00000030905	Crym	crystallin, mu [Source:MGI Symbol;Acc:MGI:102675]	7	-3.94337	0.0255704	0.402174	3.27804	0.819641
ENSMUSG00000027353	Mcm8	minichromosome maintenance 8 homologous recombination repair factor [Source:MGI Symbol;Acc:MGI:1913884]	2	-1.82285	0.0256331	0.402512	1.92981	1.05535
ENSMUSG00000118138	Gm50322	predicted gene, 50322 [Source:MGI Symbol;Acc:MGI:6303183]	19	-3.80191	0.0256434	0.402512	0.249996	0.0670707
ENSMUSG00000097207	6030443J06Rik	RIKEN cDNA 6030443J06 gene [Source:MGI Symbol;Acc:MGI:2444595]	5	-2.04845	0.025749	0.403631	0.678297	0.327468
ENSMUSG00000042613	Pbxip1	pre B cell leukemia transcription factor interacting protein 1 [Source:MGI Symbol;Acc:MGI:2441670]	3	1.51058	0.0257664	0.403631	15.3157	23.139
ENSMUSG00000073542	Cep76	centrosomal protein 76 [Source:MGI Symbol;Acc:MGI:1923401]	18	-1.78691	0.0258007	0.403648	2.74498	1.53015
ENSMUSG00000032186	Tmod2	tropomodulin 2 [Source:MGI Symbol;Acc:MGI:1355335]	9	-2.46244	0.0258192	0.403648	2.92318	1.18294
ENSMUSG00000024935	Slc1a1	solute carrier family 1 (neuronal/epithelial high affinity glutamate transporter, system Xag), member 1 [Source:MGI Symbol;Acc:MGI:105083]	19	-3.03621	0.0258562	0.403823	1.63108	0.532073
ENSMUSG00000034040	Galnt17	polypeptide N-acetylgalactosaminyltransferase 17 [Source:MGI Symbol;Acc:MGI:2137594]	5	-3.1485	0.0259183	0.404387	2.01323	0.635485
ENSMUSG00000004031	Brinp2	bone morphogenic protein/retinoic acid inducible neural-specific 2 [Source:MGI Symbol;Acc:MGI:2443333]	1	-2.60666	0.0260735	0.40451	0.859965	0.325855
ENSMUSG00000073940	Hbb-bt	hemoglobin, beta adult t chain [Source:MGI Symbol;Acc:MGI:5474850]	7	2.53194	0.0260795	0.40451	5.9303	15.0575
ENSMUSG00000082503	Gm12229	predicted gene 12229 [Source:MGI Symbol;Acc:MGI:3649743]	11	4.58998	0.0261231	0.40451	0.919844	4.38143
ENSMUSG00000038807	Rap1gap2	RAP1 GTPase activating protein 2 [Source:MGI Symbol;Acc:MGI:3028623]	11	-2.27606	0.0261283	0.40451	2.39982	1.04824
ENSMUSG00000027398	Il1b	interleukin 1 beta [Source:MGI Symbol;Acc:MGI:96543]	2	2.15737	0.0261312	0.40451	1.01178	2.20276
ENSMUSG00000020097	Sgpl1	sphingosine phosphate lyase 1 [Source:MGI Symbol;Acc:MGI:1261415]	10	1.56361	0.0261417	0.40451	6.67559	10.4323
ENSMUSG00000032420	Nt5e	5' nucleotidase, ecto [Source:MGI Symbol;Acc:MGI:99782]	9	-2.01819	0.0261482	0.40451	6.16453	3.0487
ENSMUSG00000117780	Gm3734	predicted gene 3734 [Source:MGI Symbol;Acc:MGI:3781909]	18	-2.24324	0.0261763	0.40451	1.50994	0.670898
ENSMUSG00000050822	Slc29a4	solute carrier family 29 (nucleoside transporters), member 4 [Source:MGI Symbol;Acc:MGI:2385330]	5	-2.88346	0.0261837	0.40451	6.70735	2.3133
ENSMUSG00000085819	Ube4bos1	ubiquitination factor E4B, opposite strand 1 [Source:MGI Symbol;Acc:MGI:1925072]	4	-2.20814	0.0262253	0.40451	1.71311	0.771087
ENSMUSG00000029816	Gpnmb	glycoprotein (transmembrane) nmb [Source:MGI Symbol;Acc:MGI:1934765]	6	2.23667	0.0262468	0.40451	5.17344	11.5746
ENSMUSG00000021198	Unc79	unc-79 homolog [Source:MGI Symbol;Acc:MGI:2684729]	12	-2.71563	0.0262593	0.40451	1.83201	0.671748
ENSMUSG00000106739	Gm43499	predicted gene 43499 [Source:MGI Symbol;Acc:MGI:5663636]	5	-3.04677	0.0262675	0.40451	1.48876	0.479461
ENSMUSG00000003134	Tbc1d8	TBC1 domain family, member 8 [Source:MGI Symbol;Acc:MGI:1927225]	1	-1.84501	0.0262888	0.40451	12.4748	6.75666
ENSMUSG00000111118	Gm6545	predicted gene 6545 [Source:MGI Symbol;Acc:MGI:3643874]	19	3.25023	0.026342	0.404577	0.612321	1.9909
ENSMUSG00000044708	Kcnj10	potassium inwardly-rectifying channel, subfamily J, member 10 [Source:MGI Symbol;Acc:MGI:1194504]	1	-2.64661	0.0263449	0.404577	2.42578	0.910783
ENSMUSG00000035686	Thrsp	thyroid hormone responsive [Source:MGI Symbol;Acc:MGI:109126]	7	-1.96961	0.0264249	0.405317	3.21406	1.6435
ENSMUSG00000052748	Swt1	SWT1 RNA endoribonuclease homolog (S. cerevisiae) [Source:MGI Symbol;Acc:MGI:1914125]	1	1.5716	0.0264562	0.405317	1.36275	2.13945
ENSMUSG00000034098	Fstl5	follistatin-like 5 [Source:MGI Symbol;Acc:MGI:2442179]	3	-2.96332	0.0264709	0.405317	1.68786	0.564963
ENSMUSG00000103560	Gm38070	predicted gene, 38070 [Source:MGI Symbol;Acc:MGI:5611298]	1	3.52978	0.0265135	0.405454	0.121215	0.43002
ENSMUSG00000020436	Gabrg2	gamma-aminobutyric acid (GABA) A receptor, subunit gamma 2 [Source:MGI Symbol;Acc:MGI:95623]	11	-5.12481	0.0265361	0.405454	2.27573	0.437856
ENSMUSG00000062661	Ncs1	neuronal calcium sensor 1 [Source:MGI Symbol;Acc:MGI:109166]	2	-1.78292	0.0265578	0.405454	6.20827	3.47482
ENSMUSG00000027589	Pcmtd2	protein-L-isoaspartate (D-aspartate) O-methyltransferase domain containing 2 [Source:MGI Symbol;Acc:MGI:1923927]	2	-1.824	0.0266036	0.405756	26.6326	14.5902
ENSMUSG00000053046	Brsk2	BR serine/threonine kinase 2 [Source:MGI Symbol;Acc:MGI:1923020]	7	-2.13942	0.0266298	0.40576	10.9065	5.09151
ENSMUSG00000023945	Slc5a7	solute carrier family 5 (choline transporter), member 7 [Source:MGI Symbol;Acc:MGI:1927126]	17	-6.54777	0.0267191	0.406456	0.427895	0.0600964
ENSMUSG00000109032	Gm7972	predicted gene 7972 [Source:MGI Symbol;Acc:MGI:3647337]	9	-2.15627	0.0267471	0.406456	1.87179	0.859292
ENSMUSG00000071516	H2ac13	H2A clustered histone 13 [Source:MGI Symbol;Acc:MGI:2448457]	13	-2.63383	0.0267535	0.406456	4.99101	1.91948
ENSMUSG00000041625	Ggact	gamma-glutamylamine cyclotransferase [Source:MGI Symbol;Acc:MGI:2385008]	14	1.70474	0.0268216	0.406793	2.01054	3.42432
ENSMUSG00000041828	Abca8a	ATP-binding cassette, sub-family A (ABC1), member 8a [Source:MGI Symbol;Acc:MGI:2386846]	11	-2.04972	0.0268278	0.406793	9.43285	4.59602
ENSMUSG00000048834	Vstm2a	V-set and transmembrane domain containing 2A [Source:MGI Symbol;Acc:MGI:2384826]	11	-3.35757	0.0268836	0.407244	2.35333	0.696288
ENSMUSG00000057286	St6galnac2	ST6 (alpha-N-acetyl-neuraminyl-2,3-beta-galactosyl-1,3)-N-acetylgalactosaminide alpha-2,6-sialyltransferase 2 [Source:MGI Symbol;Acc:MGI:107553]	11	-2.12126	0.0269653	0.407931	2.27862	1.07155
ENSMUSG00000042155	Klhl23	kelch-like 23 [Source:MGI Symbol;Acc:MGI:2683536]	2	-2.25965	0.0270287	0.407931	8.49045	3.74761
ENSMUSG00000087231	E230016M11Rik	RIKEN cDNA E230016M11 gene [Source:MGI Symbol;Acc:MGI:2443524]	6	-1.73723	0.0270298	0.407931	7.86902	4.51739
ENSMUSG00000031146	Plp2	proteolipid protein 2 [Source:MGI Symbol;Acc:MGI:1298382]	X	1.80608	0.0270335	0.407931	12.0464	21.7351
ENSMUSG00000033510	Otud7a	OTU domain containing 7A [Source:MGI Symbol;Acc:MGI:2158505]	7	-2.74976	0.0270646	0.407935	2.77722	1.00283
ENSMUSG00000074364	Ehd2	EH-domain containing 2 [Source:MGI Symbol;Acc:MGI:2154274]	7	1.59003	0.0270859	0.407935	11.4095	18.143
ENSMUSG00000034384	Barhl2	BarH like homeobox 2 [Source:MGI Symbol;Acc:MGI:1859314]	5	-4.74119	0.0271498	0.408467	3.6736	0.76171
ENSMUSG00000047330	Kcne4	potassium voltage-gated channel, Isk-related subfamily, gene 4 [Source:MGI Symbol;Acc:MGI:1891125]	1	2.845	0.0271736	0.408467	1.93458	5.52067
ENSMUSG00000025083	Afap1l2	actin filament associated protein 1-like 2 [Source:MGI Symbol;Acc:MGI:2147658]	19	2.85679	0.0273265	0.410371	1.73882	4.975
ENSMUSG00000074346	Kcnd3os	potassium voltage-gated channel, Shal-related family, member 3, opposite strand [Source:MGI Symbol;Acc:MGI:1925885]	3	-3.43293	0.0275036	0.412421	1.2921	0.359871
ENSMUSG00000069917	Hba-a2	hemoglobin alpha, adult chain 2 [Source:MGI Symbol;Acc:MGI:96016]	11	2.73952	0.0275158	0.412421	9.88253	27.1142
ENSMUSG00000055214	Pld5	phospholipase D family, member 5 [Source:MGI Symbol;Acc:MGI:2442056]	1	2.77963	0.0276006	0.413295	0.199893	0.562479
ENSMUSG00000063260	Syt10	synaptotagmin X [Source:MGI Symbol;Acc:MGI:1859546]	15	-2.97882	0.0276849	0.41416	1.05177	0.339983
ENSMUSG00000049191	Rtl5	retrotransposon Gag like 5 [Source:MGI Symbol;Acc:MGI:3045324]	X	-1.71573	0.0277252	0.414366	2.47143	1.43339
ENSMUSG00000073968	Trim68	tripartite motif-containing 68 [Source:MGI Symbol;Acc:MGI:2142077]	7	2.18187	0.0277593	0.414478	0.652526	1.43684
ENSMUSG00000020176	Grb10	growth factor receptor bound protein 10 [Source:MGI Symbol;Acc:MGI:103232]	11	-2.13955	0.0277954	0.414621	3.49179	1.62771
ENSMUSG00000002076	Hsf2bp	heat shock transcription factor 2 binding protein [Source:MGI Symbol;Acc:MGI:1921627]	17	-3.9028	0.0279421	0.416412	0.474047	0.118402
ENSMUSG00000066510	Ankdd1a	ankyrin repeat and death domain containing 1A [Source:MGI Symbol;Acc:MGI:2686319]	9	-2.87482	0.027979	0.416518	0.448067	0.15152
ENSMUSG00000074991	Gabrr3	gamma-aminobutyric acid (GABA) receptor, rho 3 [Source:MGI Symbol;Acc:MGI:3588203]	16	-3.82396	0.0280078	0.416518	0.904689	0.228947
ENSMUSG00000026922	Agpat2	1-acylglycerol-3-phosphate O-acyltransferase 2 (lysophosphatidic acid acyltransferase, beta) [Source:MGI Symbol;Acc:MGI:1914762]	2	2.19064	0.028048	0.416518	2.97373	6.50213
ENSMUSG00000010505	Myt1	myelin transcription factor 1 [Source:MGI Symbol;Acc:MGI:1100535]	2	-2.14409	0.0280771	0.416518	7.22305	3.36359
ENSMUSG00000021719	Rgs7bp	regulator of G-protein signalling 7 binding protein [Source:MGI Symbol;Acc:MGI:106334]	13	-2.62491	0.0281119	0.416518	2.45231	0.928108
ENSMUSG00000037224	Zfyve28	zinc finger, FYVE domain containing 28 [Source:MGI Symbol;Acc:MGI:2684992]	5	-2.41161	0.0281218	0.416518	27.1012	11.2298
ENSMUSG00000021396	Nxnl2	nucleoredoxin-like 2 [Source:MGI Symbol;Acc:MGI:1922374]	13	-1.82395	0.0281359	0.416518	8.30799	4.54237
ENSMUSG00000036249	Rbm43	RNA binding motif protein 43 [Source:MGI Symbol;Acc:MGI:1918934]	2	2.16809	0.0282339	0.417053	0.646885	1.40054
ENSMUSG00000027524	Edn3	endothelin 3 [Source:MGI Symbol;Acc:MGI:95285]	2	4.20627	0.0282477	0.417053	0.209195	0.89815
ENSMUSG00000022129	Dct	dopachrome tautomerase [Source:MGI Symbol;Acc:MGI:102563]	14	2.59217	0.0282521	0.417053	10.5291	27.2985
ENSMUSG00000024897	Apba1	amyloid beta (A4) precursor protein binding, family A, member 1 [Source:MGI Symbol;Acc:MGI:1860297]	19	-1.49286	0.0283217	0.417684	8.82809	5.90942
ENSMUSG00000078307	AI593442	expressed sequence AI593442 [Source:MGI Symbol;Acc:MGI:2143099]	9	-3.72769	0.0283517	0.417733	1.98752	0.526033
ENSMUSG00000112847	Gm47573	predicted gene, 47573 [Source:MGI Symbol;Acc:MGI:6096604]	10	-2.69831	0.0284471	0.418677	0.707204	0.252213
ENSMUSG00000002274	Metrn	meteorin, glial cell differentiation regulator [Source:MGI Symbol;Acc:MGI:1917333]	17	-2.55381	0.0284938	0.418677	1.45667	0.572885
ENSMUSG00000035849	Krt222	keratin 222 [Source:MGI Symbol;Acc:MGI:2442728]	11	-3.41761	0.0284962	0.418677	0.910579	0.26289
ENSMUSG00000027130	Slc12a6	solute carrier family 12, member 6 [Source:MGI Symbol;Acc:MGI:2135960]	2	-1.55668	0.0285867	0.419259	3.79164	2.43323
ENSMUSG00000043388	Tmem130	transmembrane protein 130 [Source:MGI Symbol;Acc:MGI:3607706]	5	-3.53713	0.0285895	0.419259	6.14328	1.72166
ENSMUSG00002076173			16	1.71149	0.0286177	0.419279	5275.38	9029.06
ENSMUSG00000038264	Sema7a	sema domain, immunoglobulin domain (Ig), and GPI membrane anchor, (semaphorin) 7A [Source:MGI Symbol;Acc:MGI:1306826]	9	-1.72094	0.0286558	0.419443	6.62795	3.83672
ENSMUSG00000027514	Zbp1	Z-DNA binding protein 1 [Source:MGI Symbol;Acc:MGI:1927449]	2	3.94548	0.028803	0.420648	0.160262	0.632963
ENSMUSG00000040340	Tex45	testis expressed 45 [Source:MGI Symbol;Acc:MGI:1923656]	8	2.32319	0.0288471	0.420648	0.655212	1.54645
ENSMUSG00000073590	3222401L13Rik	RIKEN cDNA 3222401L13 gene [Source:MGI Symbol;Acc:MGI:2444186]	18	-1.79022	0.0288572	0.420648	1.69281	0.94391
ENSMUSG00000059974	Ntm	neurotrimin [Source:MGI Symbol;Acc:MGI:2446259]	9	-2.08812	0.0288762	0.420648	8.53018	4.08006
ENSMUSG00000050953	Gja1	gap junction protein, alpha 1 [Source:MGI Symbol;Acc:MGI:95713]	10	1.84739	0.0289375	0.420648	35.6073	65.7751
ENSMUSG00000016386	Mpped2	metallophosphoesterase domain containing 2 [Source:MGI Symbol;Acc:MGI:1924265]	2	-2.31221	0.0289554	0.420648	2.53913	1.08363
ENSMUSG00000062300	Nectin2	nectin cell adhesion molecule 2 [Source:MGI Symbol;Acc:MGI:97822]	7	1.55045	0.0289603	0.420648	8.48203	13.1552
ENSMUSG00000015340	Cybb	cytochrome b-245, beta polypeptide [Source:MGI Symbol;Acc:MGI:88574]	X	3.01214	0.0289762	0.420648	0.213305	0.654408
ENSMUSG00000024754	Cemip2	cell migration inducing hyaluronidase 2 [Source:MGI Symbol;Acc:MGI:1890373]	19	1.49803	0.0289805	0.420648	6.67212	9.99473
ENSMUSG00000022723	Crybg3	beta-gamma crystallin domain containing 3 [Source:MGI Symbol;Acc:MGI:2676311]	16	1.56594	0.0290691	0.421344	19.7103	30.8646
ENSMUSG00000030554	Synm	synemin, intermediate filament protein [Source:MGI Symbol;Acc:MGI:2661187]	7	1.56822	0.0290824	0.421344	20.5135	32.1643
ENSMUSG00000017817	Jph2	junctophilin 2 [Source:MGI Symbol;Acc:MGI:1891496]	2	1.76009	0.0292264	0.421919	6.26068	11.0262
ENSMUSG00002075524			9	1.92824	0.0292265	0.421919	78.8389	152.17
ENSMUSG00000040009	Gnaz	guanine nucleotide binding protein, alpha z subunit [Source:MGI Symbol;Acc:MGI:95780]	10	-1.66836	0.0292407	0.421919	19.5693	11.7191
ENSMUSG00000031530	Dusp4	dual specificity phosphatase 4 [Source:MGI Symbol;Acc:MGI:2442191]	8	-2.47889	0.0292457	0.421919	35.7501	14.4056
ENSMUSG00000022076	Klhl1	kelch-like 1 [Source:MGI Symbol;Acc:MGI:2136335]	14	-5.91533	0.029296	0.421919	0.30717	0.0473976
ENSMUSG00000049265	Kcnk3	potassium channel, subfamily K, member 3 [Source:MGI Symbol;Acc:MGI:1100509]	5	-2.19151	0.0293103	0.421919	3.14687	1.42585
ENSMUSG00000030098	Grip2	glutamate receptor interacting protein 2 [Source:MGI Symbol;Acc:MGI:2681173]	6	-3.79273	0.0293112	0.421919	0.633881	0.163818
ENSMUSG00000022594	Lynx1	Ly6/neurotoxin 1 [Source:MGI Symbol;Acc:MGI:1345180]	15	-2.45536	0.029416	0.422992	4.84143	1.96267
ENSMUSG00000022371	Col14a1	collagen, type XIV, alpha 1 [Source:MGI Symbol;Acc:MGI:1341272]	15	2.99463	0.0294429	0.422992	0.0675524	0.207488
ENSMUSG00000049119	Fam110b	family with sequence similarity 110, member B [Source:MGI Symbol;Acc:MGI:1916593]	4	1.85155	0.029467	0.422992	1.98646	3.68108
ENSMUSG00000025746	Il6	interleukin 6 [Source:MGI Symbol;Acc:MGI:96559]	5	1.87984	0.0295575	0.423546	1.85391	3.50699
ENSMUSG00000022150	Dab2	disabled 2, mitogen-responsive phosphoprotein [Source:MGI Symbol;Acc:MGI:109175]	15	1.94981	0.0295598	0.423546	0.520146	1.02124
ENSMUSG00000102742	Pcdhga11	protocadherin gamma subfamily A, 11 [Source:MGI Symbol;Acc:MGI:1935228]	18	-1.63482	0.0297276	0.42383	4.36064	2.66856
ENSMUSG00000042078	Svop	SV2 related protein [Source:MGI Symbol;Acc:MGI:1915916]	5	-2.3655	0.0297332	0.42383	4.08554	1.71656
ENSMUSG00000036002	Fam214b	family with sequence similarity 214, member B [Source:MGI Symbol;Acc:MGI:2441854]	4	1.76961	0.0297738	0.42383	6.47803	11.4526
ENSMUSG00000048988	Elfn1	leucine rich repeat and fibronectin type III, extracellular 1 [Source:MGI Symbol;Acc:MGI:2442479]	5	-1.41841	0.0297829	0.42383	18.8315	13.2705
ENSMUSG00000052062	Pard3b	par-3 family cell polarity regulator beta [Source:MGI Symbol;Acc:MGI:1919301]	1	1.52335	0.0297916	0.42383	5.242	7.98709
ENSMUSG00000031302	Nlgn3	neuroligin 3 [Source:MGI Symbol;Acc:MGI:2444609]	X	-2.60888	0.0298281	0.42383	0.705032	0.267088
ENSMUSG00000041771	Slc24a4	solute carrier family 24 (sodium/potassium/calcium exchanger), member 4 [Source:MGI Symbol;Acc:MGI:2447362]	12	-1.72391	0.0298371	0.42383	10.6764	6.1807
ENSMUSG00000048485	Zbtb8b	zinc finger and BTB domain containing 8b [Source:MGI Symbol;Acc:MGI:2387181]	4	2.21811	0.0298871	0.42383	8.81945	19.5643
ENSMUSG00000052572	Dlg2	discs large MAGUK scaffold protein 2 [Source:MGI Symbol;Acc:MGI:1344351]	7	-1.98268	0.029913	0.42383	3.71252	1.87056
ENSMUSG00000029373	Pf4	platelet factor 4 [Source:MGI Symbol;Acc:MGI:1888711]	5	3.96233	0.0299188	0.42383	1.21869	4.89636
ENSMUSG00000097558	Gm26902	predicted gene, 26902 [Source:MGI Symbol;Acc:MGI:5477396]	19	4.16393	0.0299482	0.42383	0.300872	1.2568
ENSMUSG00000024896	Minpp1	multiple inositol polyphosphate histidine phosphatase 1 [Source:MGI Symbol;Acc:MGI:1336159]	19	1.69149	0.0299593	0.42383	3.67132	6.21695
ENSMUSG00000113404	Gm48622	predicted gene, 48622 [Source:MGI Symbol;Acc:MGI:6098218]	13	-3.04001	0.0299606	0.42383	0.407077	0.126167
ENSMUSG00000106208	Gm4734	predicted gene 4734 [Source:MGI Symbol;Acc:MGI:3782914]	9	2.06592	0.0299619	0.42383	3.09634	6.43318
ENSMUSG00000072653	Zfp783	zinc finger protein 783 [Source:MGI Symbol;Acc:MGI:3040704]	6	-2.06211	0.0299867	0.42383	1.02103	0.492374
ENSMUSG00000055296	Tmem245	transmembrane protein 245 [Source:MGI Symbol;Acc:MGI:2445107]	4	1.66266	0.0300263	0.424006	7.24748	12.0509
ENSMUSG00000024421	Lama3	laminin, alpha 3 [Source:MGI Symbol;Acc:MGI:99909]	18	2.08684	0.0301627	0.425173	15.0991	31.5119
ENSMUSG00000032246	Calml4	calmodulin-like 4 [Source:MGI Symbol;Acc:MGI:1922850]	9	3.04156	0.0301674	0.425173	0.283802	0.867773
ENSMUSG00000034177	Rnf43	ring finger protein 43 [Source:MGI Symbol;Acc:MGI:2442609]	11	1.80284	0.0301906	0.425173	1.84639	3.33713
ENSMUSG00000049001	Ndnf	neuron-derived neurotrophic factor [Source:MGI Symbol;Acc:MGI:1915419]	6	-3.44115	0.0302327	0.425382	4.47952	1.29738
ENSMUSG00000052551	Adarb2	adenosine deaminase, RNA-specific, B2 [Source:MGI Symbol;Acc:MGI:2151118]	13	-2.83028	0.0303703	0.426933	0.673207	0.235809
ENSMUSG00000016624	Phf21b	PHD finger protein 21B [Source:MGI Symbol;Acc:MGI:2443812]	15	-1.75498	0.0305242	0.427201	6.67251	3.79044
ENSMUSG00000061524	Zic2	zinc finger protein of the cerebellum 2 [Source:MGI Symbol;Acc:MGI:106679]	14	1.96412	0.0305346	0.427201	2.92747	5.77515
ENSMUSG00000022658	Tagln3	transgelin 3 [Source:MGI Symbol;Acc:MGI:1926784]	16	-3.46115	0.0305475	0.427201	9.45928	2.70131
ENSMUSG00000010803	Gabra1	gamma-aminobutyric acid (GABA) A receptor, subunit alpha 1 [Source:MGI Symbol;Acc:MGI:95613]	11	-4.3757	0.0305661	0.427201	3.7086	0.842882
ENSMUSG00000040616	Tmem51	transmembrane protein 51 [Source:MGI Symbol;Acc:MGI:2384874]	4	1.98742	0.0305776	0.427201	7.48929	14.8985
ENSMUSG00000014592	Camta1	calmodulin binding transcription activator 1 [Source:MGI Symbol;Acc:MGI:2140230]	4	-1.82416	0.0305993	0.427201	5.99891	3.28541
ENSMUSG00000022013	Dnajc15	DnaJ heat shock protein family (Hsp40) member C15 [Source:MGI Symbol;Acc:MGI:1913398]	14	-1.92032	0.0306	0.427201	1.50014	0.775129
ENSMUSG00000059674	Cdh24	cadherin-like 24 [Source:MGI Symbol;Acc:MGI:1928330]	14	-2.42983	0.0306674	0.427201	1.98589	0.816363
ENSMUSG00000024462	Gabbr1	gamma-aminobutyric acid (GABA) B receptor, 1 [Source:MGI Symbol;Acc:MGI:1860139]	17	-1.51388	0.0306875	0.427201	11.3798	7.51122
ENSMUSG00000007646	Rad51c	RAD51 paralog C [Source:MGI Symbol;Acc:MGI:2150020]	11	-3.01578	0.0307223	0.427201	0.698096	0.223866
ENSMUSG00000001901	Kcnh6	potassium voltage-gated channel, subfamily H (eag-related), member 6 [Source:MGI Symbol;Acc:MGI:2684139]	11	-2.52218	0.0307413	0.427201	4.22254	1.66153
ENSMUSG00000089371	Mir1938	microRNA 1938 [Source:MGI Symbol;Acc:MGI:3836976]	12	2.41884	0.0307437	0.427201	49.9106	121.29
ENSMUSG00000078486	Perm1	PPARGC1 and ESRR induced regulator, muscle 1 [Source:MGI Symbol;Acc:MGI:1921433]	4	-4.12815	0.0307982	0.427201	0.864993	0.203158
ENSMUSG00000034105	Meak7	MTOR associated protein , eak-7 homolog [Source:MGI Symbol;Acc:MGI:1921597]	8	-1.678	0.0308213	0.427201	6.67891	3.98357
ENSMUSG00000032259	Drd2	dopamine receptor D2 [Source:MGI Symbol;Acc:MGI:94924]	9	-3.47326	0.0308226	0.427201	2.2861	0.645044
ENSMUSG00000036466	Megf11	multiple EGF-like-domains 11 [Source:MGI Symbol;Acc:MGI:1920951]	9	1.57548	0.0308504	0.427201	1.92347	3.02979
ENSMUSG00000007837	Prrg2	proline-rich Gla (G-carboxyglutamic acid) polypeptide 2 [Source:MGI Symbol;Acc:MGI:1929596]	7	1.94609	0.0308815	0.427201	1.14699	2.23881
ENSMUSG00000035864	Syt1	synaptotagmin I [Source:MGI Symbol;Acc:MGI:99667]	10	-2.52555	0.0309165	0.427201	36.3937	14.4045
ENSMUSG00000022619	Mapk8ip2	mitogen-activated protein kinase 8 interacting protein 2 [Source:MGI Symbol;Acc:MGI:1926555]	15	-2.08545	0.0309317	0.427201	6.1136	2.92237
ENSMUSG00000059173	Pde1a	phosphodiesterase 1A, calmodulin-dependent [Source:MGI Symbol;Acc:MGI:1201792]	2	2.08076	0.0309364	0.427201	1.28651	2.68525
ENSMUSG00000053310	Nrgn	neurogranin [Source:MGI Symbol;Acc:MGI:1927184]	9	2.00335	0.0309824	0.427458	1.51755	3.04977
ENSMUSG00000041842	Fhdc1	FH2 domain containing 1 [Source:MGI Symbol;Acc:MGI:2684972]	3	2.8022	0.0311096	0.428564	0.968295	2.72471
ENSMUSG00000015143	Actn1	actinin, alpha 1 [Source:MGI Symbol;Acc:MGI:2137706]	12	1.60832	0.0311174	0.428564	24.6472	39.6367
ENSMUSG00000037001	Zfp39	zinc finger protein 39 [Source:MGI Symbol;Acc:MGI:99183]	11	-2.72874	0.0311468	0.428591	1.59785	0.578921
ENSMUSG00000056812	St8sia3	ST8 alpha-N-acetyl-neuraminide alpha-2,8-sialyltransferase 3 [Source:MGI Symbol;Acc:MGI:106019]	18	-3.46169	0.0312128	0.429017	0.661353	0.187637
ENSMUSG00000028354	Fmn2	formin 2 [Source:MGI Symbol;Acc:MGI:1859252]	1	-2.1721	0.0312327	0.429017	3.31332	1.52084
ENSMUSG00000028435	Aqp3	aquaporin 3 [Source:MGI Symbol;Acc:MGI:1333777]	4	-6.58899	0.0313305	0.42969	2.48511	0.373112
ENSMUSG00000070407	Hs3st3b1	heparan sulfate (glucosamine) 3-O-sulfotransferase 3B1 [Source:MGI Symbol;Acc:MGI:1333853]	11	-1.95134	0.0313367	0.42969	10.5338	5.38666
ENSMUSG00000028082	Sh3d19	SH3 domain protein D19 [Source:MGI Symbol;Acc:MGI:1350923]	3	1.6616	0.0313953	0.429697	0.920976	1.53054
ENSMUSG00000024403	Atp6v1g2	ATPase, H+ transporting, lysosomal V1 subunit G2 [Source:MGI Symbol;Acc:MGI:1913487]	17	-2.56724	0.0314169	0.429697	6.03345	2.33765
ENSMUSG00000042429	Adora1	adenosine A1 receptor [Source:MGI Symbol;Acc:MGI:99401]	1	1.84005	0.0314197	0.429697	1.92003	3.5424
ENSMUSG00000046613	Vwa5b2	von Willebrand factor A domain containing 5B2 [Source:MGI Symbol;Acc:MGI:2681859]	16	-2.91945	0.0314647	0.42984	0.450583	0.149329
ENSMUSG00000063142	Kcnma1	potassium large conductance calcium-activated channel, subfamily M, alpha member 1 [Source:MGI Symbol;Acc:MGI:99923]	14	-2.81075	0.0314852	0.42984	5.08783	1.80724
ENSMUSG00000000326	Comt	catechol-O-methyltransferase [Source:MGI Symbol;Acc:MGI:88470]	16	1.4629	0.0316056	0.431105	10.1904	14.9109
ENSMUSG00000033416	Gucd1	guanylyl cyclase domain containing 1 [Source:MGI Symbol;Acc:MGI:1916028]	10	-1.68622	0.031808	0.432855	4.59703	2.72301
ENSMUSG00000020284	Cfap410	cilia and flagella associated protein 410 [Source:MGI Symbol;Acc:MGI:1915134]	10	-1.59995	0.031838	0.432855	3.10548	1.93975
ENSMUSG00000030536	Iqgap1	IQ motif containing GTPase activating protein 1 [Source:MGI Symbol;Acc:MGI:1352757]	7	1.62011	0.0318966	0.432855	8.69735	14.0871
ENSMUSG00000020886	Dlg4	discs large MAGUK scaffold protein 4 [Source:MGI Symbol;Acc:MGI:1277959]	11	-1.84895	0.0319029	0.432855	21.461	11.6035
ENSMUSG00000021696	Elovl7	ELOVL family member 7, elongation of long chain fatty acids (yeast) [Source:MGI Symbol;Acc:MGI:1921809]	13	2.6352	0.0319432	0.432855	0.387827	1.02458
ENSMUSG00000033342	Plppr5	phospholipid phosphatase related 5 [Source:MGI Symbol;Acc:MGI:1923019]	3	-3.31182	0.0319485	0.432855	1.24008	0.369773
ENSMUSG00000016356	Col20a1	collagen, type XX, alpha 1 [Source:MGI Symbol;Acc:MGI:1920618]	2	-2.15217	0.0319551	0.432855	4.18812	1.94087
ENSMUSG00000067438	Hmx1	H6 homeobox 1 [Source:MGI Symbol;Acc:MGI:107178]	5	1.69674	0.0319935	0.432855	16.7335	28.4174
ENSMUSG00000024737	Slc15a3	solute carrier family 15, member 3 [Source:MGI Symbol;Acc:MGI:1929691]	19	3.08562	0.0320273	0.432855	0.165292	0.506577
ENSMUSG00000026321	Tnfrsf11a	tumor necrosis factor receptor superfamily, member 11a, NFKB activator [Source:MGI Symbol;Acc:MGI:1314891]	1	1.99886	0.0320337	0.432855	0.504719	1.01043
ENSMUSG00000024347	Psd2	pleckstrin and Sec7 domain containing 2 [Source:MGI Symbol;Acc:MGI:1921252]	18	-3.66628	0.0320387	0.432855	1.42021	0.380588
ENSMUSG00000046179	E2f8	E2F transcription factor 8 [Source:MGI Symbol;Acc:MGI:1922038]	7	-3.07111	0.0321314	0.433732	0.799355	0.260371
ENSMUSG00000086841	2410006H16Rik	RIKEN cDNA 2410006H16 gene [Source:MGI Symbol;Acc:MGI:1916471]	11	1.61106	0.0322529	0.434997	29.4697	47.4944
ENSMUSG00000047963	Stbd1	starch binding domain 1 [Source:MGI Symbol;Acc:MGI:1261768]	5	2.11226	0.0323483	0.435718	0.885463	1.88621
ENSMUSG00000000594	Gm2a	GM2 ganglioside activator protein [Source:MGI Symbol;Acc:MGI:95762]	11	1.58989	0.0323635	0.435718	9.10013	14.471
ENSMUSG00000033871	Ppargc1b	peroxisome proliferative activated receptor, gamma, coactivator 1 beta [Source:MGI Symbol;Acc:MGI:2444934]	18	-1.78284	0.032403	0.435718	13.2259	7.41042
ENSMUSG00000045795	Whamm	WAS protein homolog associated with actin, golgi membranes and microtubules [Source:MGI Symbol;Acc:MGI:2142282]	7	1.5776	0.0324566	0.435718	4.17185	6.59519
ENSMUSG00002076206			6	-2.47214	0.0324593	0.435718	31.0639	12.629
ENSMUSG00000033615	Cplx1	complexin 1 [Source:MGI Symbol;Acc:MGI:104727]	5	-3.10736	0.0324738	0.435718	7.27379	2.32292
ENSMUSG00000008734	Gprc5b	G protein-coupled receptor, family C, group 5, member B [Source:MGI Symbol;Acc:MGI:1927596]	7	1.70867	0.0325474	0.436331	62.8909	107.456
ENSMUSG00000103313	Gm38357	predicted gene, 38357 [Source:MGI Symbol;Acc:MGI:5611585]	3	-1.62367	0.0326207	0.436465	12.2171	7.53559
ENSMUSG00000031174	Rpgr	retinitis pigmentosa GTPase regulator [Source:MGI Symbol;Acc:MGI:1344037]	X	-1.59199	0.0326329	0.436465	4.55943	2.85918
ENSMUSG00000001918	Slc1a5	solute carrier family 1 (neutral amino acid transporter), member 5 [Source:MGI Symbol;Acc:MGI:105305]	7	1.79712	0.0326624	0.436465	1.37851	2.49031
ENSMUSG00000001663	Gstt1	glutathione S-transferase, theta 1 [Source:MGI Symbol;Acc:MGI:107379]	10	1.9122	0.0326692	0.436465	2.8467	5.47095
ENSMUSG00000065353	Snora73b	small nucleolar RNA, H/ACA box 73b [Source:MGI Symbol;Acc:MGI:4360049]	4	-2.53684	0.0327246	0.436831	13.0641	4.98624
ENSMUSG00000032036	Kirrel3	kirre like nephrin family adhesion molecule 3 [Source:MGI Symbol;Acc:MGI:1914953]	9	-2.1988	0.0327685	0.437043	1.53837	0.695057
ENSMUSG00000029204	Rhoh	ras homolog family member H [Source:MGI Symbol;Acc:MGI:1921984]	5	2.51279	0.0328843	0.438214	0.333153	0.840146
ENSMUSG00000029455	Aldh2	aldehyde dehydrogenase 2, mitochondrial [Source:MGI Symbol;Acc:MGI:99600]	5	1.43536	0.0329305	0.438241	7.17451	10.3005
ENSMUSG00000064350	mt-Ty	mitochondrially encoded tRNA tyrosine [Source:MGI Symbol;Acc:MGI:102470]	MT	1.82804	0.0329541	0.438241	145.366	266.786
ENSMUSG00000024856	Cdk2ap2	CDK2-associated protein 2 [Source:MGI Symbol;Acc:MGI:1098779]	19	-1.73096	0.0329705	0.438241	10.7038	6.16981
ENSMUSG00000109536	9330162G02Rik	RIKEN cDNA 9330162G02 gene [Source:MGI Symbol;Acc:MGI:2442217]	7	-2.69839	0.033043	0.438767	0.252418	0.0919996
ENSMUSG00000060301	2610008E11Rik	RIKEN cDNA 2610008E11 gene [Source:MGI Symbol;Acc:MGI:1919378]	10	-1.63401	0.033074	0.438767	3.54865	2.1649
ENSMUSG00000070000	Fcho1	FCH domain only 1 [Source:MGI Symbol;Acc:MGI:1921265]	8	-2.0363	0.0331223	0.438767	2.48371	1.21506
ENSMUSG00000116305	Lncppara	long noncoding RNA near Ppara [Source:MGI Symbol;Acc:MGI:5568843]	15	2.13192	0.0331225	0.438767	4.27953	9.14356
ENSMUSG00000038174	Fam126b	family with sequence similarity 126, member B [Source:MGI Symbol;Acc:MGI:1098784]	1	-1.82453	0.0332195	0.43968	3.33392	1.8223
ENSMUSG00000025892	Gria4	glutamate receptor, ionotropic, AMPA4 (alpha 4) [Source:MGI Symbol;Acc:MGI:95811]	9	-2.61741	0.0333478	0.440387	3.49188	1.32654
ENSMUSG00000047013	Fbxo41	F-box protein 41 [Source:MGI Symbol;Acc:MGI:1261912]	6	-2.68641	0.0333636	0.440387	1.24607	0.457535
ENSMUSG00000046709	Mapk10	mitogen-activated protein kinase 10 [Source:MGI Symbol;Acc:MGI:1346863]	5	-1.70642	0.0334153	0.440387	2.79438	1.63342
ENSMUSG00000108423	Gm44856	predicted gene 44856 [Source:MGI Symbol;Acc:MGI:5753432]	7	-2.46004	0.0334754	0.440387	10.0301	3.97438
ENSMUSG00000085228	Gm14376	predicted gene 14376 [Source:MGI Symbol;Acc:MGI:3651797]	7	2.68561	0.0334757	0.440387	2.51838	6.86497
ENSMUSG00000041141	Pnmal1	PNMA-like 1 [Source:MGI Symbol;Acc:MGI:1918941]	7	-3.21283	0.0335192	0.440387	1.62462	0.496309
ENSMUSG00000025422	Agap2	ArfGAP with GTPase domain, ankyrin repeat and PH domain 2 [Source:MGI Symbol;Acc:MGI:3580016]	10	-2.44266	0.0335278	0.440387	5.53685	2.25946
ENSMUSG00000005994	Tyrp1	tyrosinase-related protein 1 [Source:MGI Symbol;Acc:MGI:98881]	4	2.16336	0.0336006	0.440387	5.86901	12.6966
ENSMUSG00000023186	Vwa5a	von Willebrand factor A domain containing 5A [Source:MGI Symbol;Acc:MGI:1915026]	9	1.7371	0.0336205	0.440387	12.2924	21.3444
ENSMUSG00000064215	Ifi27	interferon, alpha-inducible protein 27 [Source:MGI Symbol;Acc:MGI:1277180]	12	1.91152	0.0336291	0.440387	10.2454	19.5909
ENSMUSG00000034701	Neurod1	neurogenic differentiation 1 [Source:MGI Symbol;Acc:MGI:1339708]	2	-2.02781	0.0336312	0.440387	43.8159	21.5904
ENSMUSG00000097440	Gm6277	predicted gene 6277 [Source:MGI Symbol;Acc:MGI:3779583]	18	-2.37249	0.0336535	0.440387	0.833884	0.355938
ENSMUSG00000028599	Tnfrsf1b	tumor necrosis factor receptor superfamily, member 1b [Source:MGI Symbol;Acc:MGI:1314883]	4	2.71216	0.0336581	0.440387	1.80643	4.90439
ENSMUSG00000018849	Wwc1	WW, C2 and coiled-coil domain containing 1 [Source:MGI Symbol;Acc:MGI:2388637]	11	1.79024	0.0336699	0.440387	1.56155	2.80731
ENSMUSG00000028280	Gabrr1	gamma-aminobutyric acid (GABA) C receptor, subunit rho 1 [Source:MGI Symbol;Acc:MGI:95625]	4	-3.69855	0.0336959	0.440387	6.57032	1.75859
ENSMUSG00000059040	Eno1b	enolase 1B, retrotransposed [Source:MGI Symbol;Acc:MGI:3648653]	18	-2.69653	0.0337595	0.440849	14.0001	5.19379
ENSMUSG00000028121	Bcar3	breast cancer anti-estrogen resistance 3 [Source:MGI Symbol;Acc:MGI:1352501]	3	1.46687	0.0337878	0.44085	10.3013	15.1133
ENSMUSG00000041729	Coro2b	coronin, actin binding protein, 2B [Source:MGI Symbol;Acc:MGI:2444283]	9	-1.41465	0.0338544	0.441351	21.8394	15.4387
ENSMUSG00000039683	Sdk1	sidekick cell adhesion molecule 1 [Source:MGI Symbol;Acc:MGI:2444413]	5	1.50377	0.0338855	0.441388	5.58803	8.40465
ENSMUSG00000025348	Itga7	integrin alpha 7 [Source:MGI Symbol;Acc:MGI:102700]	10	1.9471	0.0339447	0.44179	4.39372	8.55102
ENSMUSG00000016524	Il19	interleukin 19 [Source:MGI Symbol;Acc:MGI:1890472]	1	4.881	0.0339878	0.441842	1.18582	5.79651
ENSMUSG00000053175	Bcl3	B cell leukemia/lymphoma 3 [Source:MGI Symbol;Acc:MGI:88140]	7	-1.88088	0.0340469	0.441842	4.22783	2.24533
ENSMUSG00000038390	Gpr162	G protein-coupled receptor 162 [Source:MGI Symbol;Acc:MGI:1315214]	6	-2.20566	0.0340838	0.441842	3.35045	1.50657
ENSMUSG00000031026	Trim66	tripartite motif-containing 66 [Source:MGI Symbol;Acc:MGI:2152406]	7	-3.10721	0.0341199	0.441842	0.605895	0.191543
ENSMUSG00000053226	Dand5	DAN domain family member 5, BMP antagonist [Source:MGI Symbol;Acc:MGI:1344365]	8	-2.12799	0.0341515	0.441842	3.23281	1.52079
ENSMUSG00000033998	Kcnk1	potassium channel, subfamily K, member 1 [Source:MGI Symbol;Acc:MGI:109322]	8	1.45155	0.034179	0.441842	25.2819	36.6812
ENSMUSG00000047976	Kcna1	potassium voltage-gated channel, shaker-related subfamily, member 1 [Source:MGI Symbol;Acc:MGI:96654]	6	-3.79335	0.0341842	0.441842	1.25353	0.322496
ENSMUSG00000032232	Cgnl1	cingulin-like 1 [Source:MGI Symbol;Acc:MGI:1915428]	9	1.7697	0.0341848	0.441842	24.935	44.1333
ENSMUSG00000027966	Col11a1	collagen, type XI, alpha 1 [Source:MGI Symbol;Acc:MGI:88446]	3	1.96745	0.0342033	0.441842	1.01351	1.99817
ENSMUSG00000063430	Wscd2	WSC domain containing 2 [Source:MGI Symbol;Acc:MGI:2445030]	5	-1.75636	0.0342945	0.442209	0.8597	0.488913
ENSMUSG00000038486	Sv2a	synaptic vesicle glycoprotein 2 a [Source:MGI Symbol;Acc:MGI:1927139]	3	-1.49889	0.0343077	0.442209	20.0483	13.3728
ENSMUSG00000109429	Gm45223	predicted gene 45223 [Source:MGI Symbol;Acc:MGI:5753799]	7	1.78183	0.0343873	0.442209	1.51682	2.71109
ENSMUSG00000021098	4930447C04Rik	RIKEN cDNA 4930447C04 gene [Source:MGI Symbol;Acc:MGI:1923051]	12	-1.84819	0.034393	0.442209	2.85244	1.53824
ENSMUSG00000016487	Ppfibp1	PTPRF interacting protein, binding protein 1 (liprin beta 1) [Source:MGI Symbol;Acc:MGI:1914783]	6	1.59544	0.0343971	0.442209	9.50823	15.1682
ENSMUSG00000024472	Dcp2	decapping mRNA 2 [Source:MGI Symbol;Acc:MGI:1917890]	18	1.4476	0.034411	0.442209	6.23736	9.02296
ENSMUSG00000025189	Cnnm1	cyclin M1 [Source:MGI Symbol;Acc:MGI:1891366]	19	-1.73592	0.0344299	0.442209	3.11612	1.79253
ENSMUSG00000011148	Adssl1	adenylosuccinate synthetase like 1 [Source:MGI Symbol;Acc:MGI:87947]	12	-1.93719	0.0345065	0.442828	5.65303	2.90814
ENSMUSG00000102697	Pcdhac2	protocadherin alpha subfamily C, 2 [Source:MGI Symbol;Acc:MGI:1891443]	18	-1.98925	0.034561	0.443165	1.51703	0.758142
ENSMUSG00000064246	Chil1	chitinase-like 1 [Source:MGI Symbol;Acc:MGI:1340899]	1	2.03049	0.0346327	0.44372	3.32592	6.75555
ENSMUSG00000019188	H13	histocompatibility 13 [Source:MGI Symbol;Acc:MGI:95886]	2	1.45972	0.0347135	0.444078	8.47353	12.3691
ENSMUSG00000038642	Ctss	cathepsin S [Source:MGI Symbol;Acc:MGI:107341]	3	2.14363	0.0347176	0.444078	3.66844	7.91226
ENSMUSG00000032300	1700017B05Rik	RIKEN cDNA 1700017B05 gene [Source:MGI Symbol;Acc:MGI:1921461]	9	1.81007	0.0348074	0.444198	2.58515	4.66923
ENSMUSG00000044177	Wfikkn2	WAP, follistatin/kazal, immunoglobulin, kunitz and netrin domain containing 2 [Source:MGI Symbol;Acc:MGI:2669209]	11	2.09148	0.0348107	0.444198	0.962287	2.01582
ENSMUSG00000035964	Tmem59l	transmembrane protein 59-like [Source:MGI Symbol;Acc:MGI:1915187]	8	-2.29985	0.0348267	0.444198	8.89932	3.83981
ENSMUSG00000074743	Thbd	thrombomodulin [Source:MGI Symbol;Acc:MGI:98736]	2	2.24708	0.0348408	0.444198	1.59446	3.57913
ENSMUSG00000023345	Poc1a	POC1 centriolar protein A [Source:MGI Symbol;Acc:MGI:1917485]	9	-2.43799	0.0348939	0.444513	0.744892	0.303238
ENSMUSG00000043460	Elfn2	leucine rich repeat and fibronectin type III, extracellular 2 [Source:MGI Symbol;Acc:MGI:3608416]	15	-2.55262	0.0349802	0.44525	3.5992	1.40447
ENSMUSG00000090071	Cdk5r2	cyclin-dependent kinase 5, regulatory subunit 2 (p39) [Source:MGI Symbol;Acc:MGI:1330828]	1	-1.83618	0.0350603	0.445376	20.3827	11.0843
ENSMUSG00000045179	Sox3	SRY (sex determining region Y)-box 3 [Source:MGI Symbol;Acc:MGI:98365]	X	2.44042	0.0351031	0.445376	0.557839	1.3762
ENSMUSG00000050666	Vstm4	V-set and transmembrane domain containing 4 [Source:MGI Symbol;Acc:MGI:2444633]	14	2.06457	0.0351152	0.445376	2.08855	4.32926
ENSMUSG00000022687	Boc	biregional cell adhesion molecule-related/down-regulated by oncogenes (Cdon) binding protein [Source:MGI Symbol;Acc:MGI:2151153]	16	1.98222	0.0351158	0.445376	2.10238	4.18245
ENSMUSG00000021194	Chga	chromogranin A [Source:MGI Symbol;Acc:MGI:88394]	12	-2.68506	0.0351327	0.445376	25.5686	9.50542
ENSMUSG00000057182	Scn3a	sodium channel, voltage-gated, type III, alpha [Source:MGI Symbol;Acc:MGI:98249]	2	-2.87764	0.0352469	0.44646	0.669292	0.229516
ENSMUSG00000033981	Gria2	glutamate receptor, ionotropic, AMPA2 (alpha 2) [Source:MGI Symbol;Acc:MGI:95809]	3	-2.76031	0.0353428	0.447313	3.27526	1.18397
ENSMUSG00000052911	Lamb2	laminin, beta 2 [Source:MGI Symbol;Acc:MGI:99916]	9	1.60092	0.0353829	0.447457	22.8658	36.6088
ENSMUSG00000002897	Il17ra	interleukin 17 receptor A [Source:MGI Symbol;Acc:MGI:107399]	6	1.65657	0.0354721	0.448223	1.33498	2.20592
ENSMUSG00000037126	Psd	pleckstrin and Sec7 domain containing [Source:MGI Symbol;Acc:MGI:1920978]	19	-1.8498	0.0355969	0.449436	11.7674	6.35645
ENSMUSG00000024851	Pitpnm1	phosphatidylinositol transfer protein, membrane-associated 1 [Source:MGI Symbol;Acc:MGI:1197524]	19	-1.74485	0.0356613	0.44961	42.5367	24.3721
ENSMUSG00000033032	Afap1l1	actin filament associated protein 1-like 1 [Source:MGI Symbol;Acc:MGI:2147199]	18	-2.69154	0.0356683	0.44961	0.934283	0.346194
ENSMUSG00000015533	Itga2	integrin alpha 2 [Source:MGI Symbol;Acc:MGI:96600]	13	2.91453	0.0357129	0.449626	0.15546	0.457069
ENSMUSG00000020932	Gfap	glial fibrillary acidic protein [Source:MGI Symbol;Acc:MGI:95697]	11	-1.70441	0.035738	0.449626	31.4422	18.4403
ENSMUSG00000052331	Ankrd44	ankyrin repeat domain 44 [Source:MGI Symbol;Acc:MGI:3045243]	1	1.48368	0.0357952	0.449626	3.56279	5.2863
ENSMUSG00000072769	Gm10419	predicted gene 10419 [Source:MGI Symbol;Acc:MGI:3642823]	5	-2.1732	0.0358094	0.449626	0.96805	0.443043
ENSMUSG00000052430	Bmpr1b	bone morphogenetic protein receptor, type 1B [Source:MGI Symbol;Acc:MGI:107191]	3	-2.37281	0.0358135	0.449626	1.42508	0.596107
ENSMUSG00000023911	Flywch2	FLYWCH family member 2 [Source:MGI Symbol;Acc:MGI:1924167]	17	-2.30695	0.0358814	0.450116	3.04463	1.30846
ENSMUSG00000097265	Gm26803	predicted gene, 26803 [Source:MGI Symbol;Acc:MGI:5477297]	13	-4.01956	0.035939	0.450184	2.0059	0.481241
ENSMUSG00000010755	Cars	cysteinyl-tRNA synthetase [Source:MGI Symbol;Acc:MGI:1351477]	7	1.48664	0.0359444	0.450184	4.88185	7.25022
ENSMUSG00000042129	Rassf4	Ras association (RalGDS/AF-6) domain family member 4 [Source:MGI Symbol;Acc:MGI:2386853]	6	-2.10426	0.0360161	0.450655	1.35734	0.646637
ENSMUSG00000061878	Sphk1	sphingosine kinase 1 [Source:MGI Symbol;Acc:MGI:1316649]	11	-1.95179	0.0360626	0.450655	6.34917	3.24567
ENSMUSG00000033554	Dph5	diphthamide biosynthesis 5 [Source:MGI Symbol;Acc:MGI:1916990]	3	1.74202	0.0360685	0.450655	1.12331	1.95562
ENSMUSG00000001418	Glmp	glycosylated lysosomal membrane protein [Source:MGI Symbol;Acc:MGI:1913318]	3	1.63494	0.036176	0.451636	1.87626	3.07122
ENSMUSG00000035696	Rnf38	ring finger protein 38 [Source:MGI Symbol;Acc:MGI:1920719]	4	1.43008	0.03635	0.453264	5.37296	7.68657
ENSMUSG00000020638	Cmpk2	cytidine monophosphate (UMP-CMP) kinase 2, mitochondrial [Source:MGI Symbol;Acc:MGI:99830]	12	2.50406	0.0363644	0.453264	0.567052	1.42158
ENSMUSG00000028207	Asph	aspartate-beta-hydroxylase [Source:MGI Symbol;Acc:MGI:1914186]	4	1.47963	0.0365092	0.454705	9.80649	14.5116
ENSMUSG00000028524	Sgip1	SH3-domain GRB2-like (endophilin) interacting protein 1 [Source:MGI Symbol;Acc:MGI:1920344]	4	-2.04208	0.0365405	0.454732	14.4493	7.0708
ENSMUSG00000027257	Pacsin3	protein kinase C and casein kinase substrate in neurons 3 [Source:MGI Symbol;Acc:MGI:1891410]	2	1.53399	0.0365938	0.454879	3.89245	5.9708
ENSMUSG00000085882	2610507I01Rik	RIKEN cDNA 2610507I01 gene [Source:MGI Symbol;Acc:MGI:1919453]	11	-3.81293	0.0366105	0.454879	1.24679	0.302357
ENSMUSG00000050272	Dscam	DS cell adhesion molecule [Source:MGI Symbol;Acc:MGI:1196281]	16	-2.72139	0.036675	0.455113	2.65915	0.971838
ENSMUSG00000002031	Ift46	intraflagellar transport 46 [Source:MGI Symbol;Acc:MGI:1923818]	9	-1.64117	0.0366876	0.455113	2.7112	1.65608
ENSMUSG00000033356	Pus7l	pseudouridylate synthase 7-like [Source:MGI Symbol;Acc:MGI:1926145]	15	2.98502	0.0367298	0.455177	0.342267	1.03227
ENSMUSG00000027273	Snap25	synaptosomal-associated protein 25 [Source:MGI Symbol;Acc:MGI:98331]	2	-2.31049	0.0367667	0.455177	29.6354	12.819
ENSMUSG00000070304	Scn2b	sodium channel, voltage-gated, type II, beta [Source:MGI Symbol;Acc:MGI:106921]	9	-2.53333	0.0367802	0.455177	2.60611	1.01952
ENSMUSG00000035835	Plppr3	phospholipid phosphatase related 3 [Source:MGI Symbol;Acc:MGI:2388640]	10	-2.38773	0.0368572	0.455625	1.11802	0.462016
ENSMUSG00000028465	Tln1	talin 1 [Source:MGI Symbol;Acc:MGI:1099832]	4	1.451	0.0369196	0.455625	24.532	35.5972
ENSMUSG00000083307	AA414768	expressed sequence AA414768 [Source:MGI Symbol;Acc:MGI:3035137]	X	-2.15115	0.0369271	0.455625	4.0749	1.89903
ENSMUSG00000050711	Scg2	secretogranin II [Source:MGI Symbol;Acc:MGI:103033]	1	-2.89835	0.0369331	0.455625	32.3523	11.1441
ENSMUSG00000038916	Soga3	SOGA family member 3 [Source:MGI Symbol;Acc:MGI:1914662]	10	-2.44138	0.0369669	0.455682	5.32277	2.17087
ENSMUSG00000002032	Tmem25	transmembrane protein 25 [Source:MGI Symbol;Acc:MGI:1918937]	9	-2.64521	0.0370723	0.456621	1.3606	0.506646
ENSMUSG00000110993	Gm47963	predicted gene, 47963 [Source:MGI Symbol;Acc:MGI:6097241]	9	-2.23953	0.037202	0.457504	1.21891	0.544014
ENSMUSG00000073647	Gm10557	predicted gene 10557 [Source:MGI Symbol;Acc:MGI:3708638]	18	-1.58304	0.0372026	0.457504	47.9517	30.2667
ENSMUSG00000020810	Cygb	cytoglobin [Source:MGI Symbol;Acc:MGI:2149481]	11	-2.31958	0.0372774	0.457793	9.57123	4.10894
ENSMUSG00000022973	Synj1	synaptojanin 1 [Source:MGI Symbol;Acc:MGI:1354961]	16	-1.66543	0.0372848	0.457793	16.0389	9.62592
ENSMUSG00000032092	Mpzl2	myelin protein zero-like 2 [Source:MGI Symbol;Acc:MGI:1289160]	9	2.9619	0.0373458	0.457986	0.478839	1.41925
ENSMUSG00000023830	Igf2r	insulin-like growth factor 2 receptor [Source:MGI Symbol;Acc:MGI:96435]	17	1.53826	0.0373765	0.457986	17.6653	27.1679
ENSMUSG00000105302	Gm19817	predicted gene, 19817 [Source:MGI Symbol;Acc:MGI:5012002]	3	3.12924	0.0373884	0.457986	0.250095	0.792467
ENSMUSG00000040270	Bach2	BTB and CNC homology, basic leucine zipper transcription factor 2 [Source:MGI Symbol;Acc:MGI:894679]	4	1.55913	0.0375568	0.459689	4.73139	7.37015
ENSMUSG00000023017	Asic1	acid-sensing (proton-gated) ion channel 1 [Source:MGI Symbol;Acc:MGI:1194915]	15	-3.5205	0.0375973	0.45976	0.825199	0.228204
ENSMUSG00000026072	Il1r1	interleukin 1 receptor, type I [Source:MGI Symbol;Acc:MGI:96545]	1	2.32983	0.0376215	0.45976	1.91158	4.44905
ENSMUSG00000064329	Scn1a	sodium channel, voltage-gated, type I, alpha [Source:MGI Symbol;Acc:MGI:98246]	2	-2.87322	0.0377091	0.46047	1.6722	0.578615
ENSMUSG00000035456	Prdm8	PR domain containing 8 [Source:MGI Symbol;Acc:MGI:1924880]	5	-2.37389	0.0377872	0.460754	10.1282	4.25723
ENSMUSG00000087590	Epb41l4aos	erythrocyte membrane protein band 4.1 like 4a, opposite strand [Source:MGI Symbol;Acc:MGI:1916999]	18	2.0441	0.0377914	0.460754	4.58897	9.36875
ENSMUSG00000091264	Smim13	small integral membrane protein 13 [Source:MGI Symbol;Acc:MGI:2652854]	13	-1.60716	0.0378803	0.461478	8.78832	5.45604
ENSMUSG00000028270	Gbp2	guanylate binding protein 2 [Source:MGI Symbol;Acc:MGI:102772]	3	2.7	0.0380425	0.462726	19.586	52.8695
ENSMUSG00000054793	Cadm4	cell adhesion molecule 4 [Source:MGI Symbol;Acc:MGI:2449088]	7	-1.9665	0.0381109	0.462726	7.78296	3.94133
ENSMUSG00000038146	Notch3	notch 3 [Source:MGI Symbol;Acc:MGI:99460]	17	2.00863	0.0381415	0.462726	0.582085	1.17417
ENSMUSG00000103377	Gm37180	predicted gene, 37180 [Source:MGI Symbol;Acc:MGI:5610408]	1	3.04899	0.0381863	0.462726	0.310557	0.968671
ENSMUSG00000036109	Mbnl3	muscleblind like splicing factor 3 [Source:MGI Symbol;Acc:MGI:2444912]	X	3.73825	0.0381894	0.462726	0.0544659	0.205427
ENSMUSG00000072676	Tmem254a	transmembrane protein 254a [Source:MGI Symbol;Acc:MGI:1196450]	14	1.79771	0.038197	0.462726	3.11647	5.61124
ENSMUSG00000116165	Pdxp	pyridoxal (pyridoxine, vitamin B6) phosphatase [Source:MGI Symbol;Acc:MGI:1919282]	15	-2.28612	0.0381997	0.462726	3.28255	1.42035
ENSMUSG00000024451	Arap3	ArfGAP with RhoGAP domain, ankyrin repeat and PH domain 3 [Source:MGI Symbol;Acc:MGI:2147274]	18	3.87163	0.0382198	0.462726	0.0704201	0.281519
ENSMUSG00000051586	Mical3	microtubule associated monooxygenase, calponin and LIM domain containing 3 [Source:MGI Symbol;Acc:MGI:2442733]	6	1.48424	0.0383482	0.463197	8.78511	13.0389
ENSMUSG00000051224	Tceanc	transcription elongation factor A (SII) N-terminal and central domain containing [Source:MGI Symbol;Acc:MGI:2685236]	X	-2.23865	0.0383682	0.463197	1.20638	0.530392
ENSMUSG00000061186	Sfmbt2	Scm-like with four mbt domains 2 [Source:MGI Symbol;Acc:MGI:2447794]	2	-2.77769	0.0383814	0.463197	0.183858	0.0636438
ENSMUSG00000109321	A330076H08Rik	RIKEN cDNA A330076H08 gene [Source:MGI Symbol;Acc:MGI:2443193]	7	-2.10526	0.0383904	0.463197	1.90753	0.897419
ENSMUSG00000027695	Pld1	phospholipase D1 [Source:MGI Symbol;Acc:MGI:109585]	3	1.66299	0.038407	0.463197	2.21869	3.6934
ENSMUSG00000039236	Isg20	interferon-stimulated protein [Source:MGI Symbol;Acc:MGI:1928895]	7	2.33419	0.0384473	0.463325	0.621161	1.44611
ENSMUSG00000068732	Tmem167b	transmembrane protein 167B [Source:MGI Symbol;Acc:MGI:1914745]	3	1.46094	0.0385772	0.464116	7.67254	11.199
ENSMUSG00000036879	Phkb	phosphorylase kinase beta [Source:MGI Symbol;Acc:MGI:97578]	8	1.63936	0.038589	0.464116	5.11101	8.3831
ENSMUSG00000059791	Nrm	nurim (nuclear envelope membrane protein) [Source:MGI Symbol;Acc:MGI:2146855]	17	-1.9036	0.0386284	0.464116	6.61867	3.47027
ENSMUSG00000028645	Slc2a1	solute carrier family 2 (facilitated glucose transporter), member 1 [Source:MGI Symbol;Acc:MGI:95755]	4	1.54645	0.0386334	0.464116	250.19	386.904
ENSMUSG00000042751	Nmnat2	nicotinamide nucleotide adenylyltransferase 2 [Source:MGI Symbol;Acc:MGI:2444155]	1	-1.72064	0.0386615	0.464116	2.88259	1.67546
ENSMUSG00000022321	Cdh10	cadherin 10 [Source:MGI Symbol;Acc:MGI:107436]	15	-3.44835	0.0387156	0.464331	0.184515	0.0504879
ENSMUSG00000003352	Cacnb3	calcium channel, voltage-dependent, beta 3 subunit [Source:MGI Symbol;Acc:MGI:103307]	15	-1.61437	0.0387389	0.464331	3.27558	2.02062
ENSMUSG00000032181	Scg3	secretogranin III [Source:MGI Symbol;Acc:MGI:103032]	9	-2.66258	0.0388497	0.464896	18.0674	6.76842
ENSMUSG00000105167	Snord43	small nucleolar RNA, C/D box 43 [Source:MGI Symbol;Acc:MGI:3819534]	15	2.37958	0.0388722	0.464896	8.697	20.9006
ENSMUSG00000102465	Gm38198	predicted gene, 38198 [Source:MGI Symbol;Acc:MGI:5611426]	1	-5.71049	0.0388753	0.464896	0.835494	0.138305
ENSMUSG00000039357	Fut11	fucosyltransferase 11 [Source:MGI Symbol;Acc:MGI:1920318]	14	1.58523	0.0390141	0.464993	2.69079	4.26517
ENSMUSG00000107997	Gm44243	predicted gene, 44243 [Source:MGI Symbol;Acc:MGI:5690635]	6	-2.75109	0.0390165	0.464993	1.67376	0.573753
ENSMUSG00000032766	Gng11	guanine nucleotide binding protein (G protein), gamma 11 [Source:MGI Symbol;Acc:MGI:1913316]	6	1.82311	0.0390216	0.464993	6.03775	10.9949
ENSMUSG00000026204	Ptprn	protein tyrosine phosphatase, receptor type, N [Source:MGI Symbol;Acc:MGI:102765]	1	-2.23942	0.0390254	0.464993	9.22677	4.11099
ENSMUSG00000031791	Tmem38a	transmembrane protein 38A [Source:MGI Symbol;Acc:MGI:1921416]	8	-1.65153	0.0390546	0.464993	9.21226	5.58889
ENSMUSG00000051703	Tmem198	transmembrane protein 198 [Source:MGI Symbol;Acc:MGI:2443133]	1	-2.59893	0.0390782	0.464993	2.48108	0.947177
ENSMUSG00000030729	Pgm2l1	phosphoglucomutase 2-like 1 [Source:MGI Symbol;Acc:MGI:1918224]	7	-1.77436	0.0390918	0.464993	4.51509	2.5401
ENSMUSG00000034958	Atcay	ataxia, cerebellar, Cayman type [Source:MGI Symbol;Acc:MGI:2448730]	10	-3.20906	0.0392496	0.466515	4.47268	1.38371
ENSMUSG00000038020	Rapgefl1	Rap guanine nucleotide exchange factor (GEF)-like 1 [Source:MGI Symbol;Acc:MGI:3611446]	11	-1.88999	0.0393068	0.46669	1.22485	0.651279
ENSMUSG00000038077	Kcna6	potassium voltage-gated channel, shaker-related, subfamily, member 6 [Source:MGI Symbol;Acc:MGI:96663]	6	-2.46886	0.0393241	0.46669	1.89916	0.762945
ENSMUSG00000054580	Pla2r1	phospholipase A2 receptor 1 [Source:MGI Symbol;Acc:MGI:102468]	2	-1.87506	0.039387	0.46688	13.5598	7.22563
ENSMUSG00000041460	Cacna2d4	calcium channel, voltage-dependent, alpha 2/delta subunit 4 [Source:MGI Symbol;Acc:MGI:2442632]	6	-1.92039	0.0394508	0.46688	28.1249	14.6408
ENSMUSG00000025809	Itgb1	integrin beta 1 (fibronectin receptor beta) [Source:MGI Symbol;Acc:MGI:96610]	8	1.64507	0.0394541	0.46688	54.9505	90.3848
ENSMUSG00000096929	A330023F24Rik	RIKEN cDNA A330023F24 gene [Source:MGI Symbol;Acc:MGI:2443958]	1	-1.68795	0.0394711	0.46688	4.66904	2.76196
ENSMUSG00000034765	Dusp5	dual specificity phosphatase 5 [Source:MGI Symbol;Acc:MGI:2685183]	19	-1.8838	0.0395081	0.46688	229.173	121.648
ENSMUSG00000056288	Gm11961	predicted gene 11961 [Source:MGI Symbol;Acc:MGI:3652303]	11	-2.07243	0.0395209	0.46688	6.04702	2.88873
ENSMUSG00000085998	AW822252	expressed sequence AW822252 [Source:MGI Symbol;Acc:MGI:2148030]	X	-2.76148	0.0395882	0.46688	0.510483	0.1841
ENSMUSG00000030838	Ush1c	USH1 protein network component harmonin [Source:MGI Symbol;Acc:MGI:1919338]	7	-3.1153	0.0395939	0.46688	0.563071	0.178145
ENSMUSG00000025551	Fgf14	fibroblast growth factor 14 [Source:MGI Symbol;Acc:MGI:109189]	14	-3.15072	0.0396174	0.46688	1.14379	0.354145
ENSMUSG00000071757	Zhx2	zinc fingers and homeoboxes 2 [Source:MGI Symbol;Acc:MGI:2683087]	15	1.57651	0.0396391	0.46688	11.3855	17.9562
ENSMUSG00000099696	2900052N01Rik	RIKEN cDNA 2900052N01 gene [Source:MGI Symbol;Acc:MGI:1920290]	9	2.04515	0.0397356	0.467664	2.2934	4.70341
ENSMUSG00000036585	Fgf1	fibroblast growth factor 1 [Source:MGI Symbol;Acc:MGI:95515]	18	1.47701	0.039847	0.468328	5.14215	7.60047
ENSMUSG00000037653	Kctd8	potassium channel tetramerisation domain containing 8 [Source:MGI Symbol;Acc:MGI:2443804]	5	-2.61282	0.039852	0.468328	2.14174	0.807843
ENSMUSG00000102971	A730062M13Rik	RIKEN cDNA A730062M13 gene [Source:MGI Symbol;Acc:MGI:3029302]	9	-3.47142	0.039951	0.468545	0.744885	0.200033
ENSMUSG00000074916	Chst14	carbohydrate sulfotransferase 14 [Source:MGI Symbol;Acc:MGI:1919386]	2	2.40973	0.0399695	0.468545	1.13699	2.76504
ENSMUSG00000071537	Klrg2	killer cell lectin-like receptor subfamily G, member 2 [Source:MGI Symbol;Acc:MGI:1921503]	6	2.41829	0.0399816	0.468545	0.499446	1.20905
ENSMUSG00000041046	Ramp3	receptor (calcitonin) activity modifying protein 3 [Source:MGI Symbol;Acc:MGI:1860292]	11	-2.19245	0.0400134	0.468545	2.78305	1.25159
ENSMUSG00000057229	Dmac2	distal membrane arm assembly complex 2 [Source:MGI Symbol;Acc:MGI:1913599]	7	-1.62514	0.0400301	0.468545	4.27605	2.63502
ENSMUSG00000044365	Cxxc4	CXXC finger 4 [Source:MGI Symbol;Acc:MGI:2442112]	3	-1.77763	0.0400504	0.468545	2.93031	1.64573
ENSMUSG00000070695	Cntnap5a	contactin associated protein-like 5A [Source:MGI Symbol;Acc:MGI:3643623]	1	-4.10729	0.0401985	0.469702	0.490774	0.116689
ENSMUSG00000040722	Scamp5	secretory carrier membrane protein 5 [Source:MGI Symbol;Acc:MGI:1928948]	9	-1.53537	0.0402095	0.469702	19.0376	12.3933
ENSMUSG00000028804	Csmd2	CUB and Sushi multiple domains 2 [Source:MGI Symbol;Acc:MGI:2386401]	4	-2.4989	0.0403327	0.47079	0.833534	0.330979
ENSMUSG00000031596	Slc7a2	solute carrier family 7 (cationic amino acid transporter, y+ system), member 2 [Source:MGI Symbol;Acc:MGI:99828]	8	2.27763	0.0403686	0.470856	39.5636	90.1152
ENSMUSG00000043843	Tmem145	transmembrane protein 145 [Source:MGI Symbol;Acc:MGI:3607779]	7	-1.93626	0.040525	0.472328	8.16084	4.20122
ENSMUSG00000024424	Ttc39c	tetratricopeptide repeat domain 39C [Source:MGI Symbol;Acc:MGI:1919997]	18	-1.69283	0.0406567	0.47351	8.87877	5.24268
ENSMUSG00000020689	Itgb3	integrin beta 3 [Source:MGI Symbol;Acc:MGI:96612]	11	2.67358	0.0408061	0.474896	0.122071	0.332582
ENSMUSG00000054409	Tmem74	transmembrane protein 74 [Source:MGI Symbol;Acc:MGI:2443417]	15	3.98988	0.0409184	0.475847	0.215729	0.861902
ENSMUSG00000020105	Lrig3	leucine-rich repeats and immunoglobulin-like domains 3 [Source:MGI Symbol;Acc:MGI:2443955]	10	1.80063	0.0409718	0.475923	2.72473	4.90935
ENSMUSG00000102151	Gm37472	predicted gene, 37472 [Source:MGI Symbol;Acc:MGI:5610700]	14	-2.14364	0.0410191	0.475923	0.618106	0.285367
ENSMUSG00000001103	Sebox	SEBOX homeobox [Source:MGI Symbol;Acc:MGI:108012]	11	-3.26252	0.0410315	0.475923	6.18976	1.86691
ENSMUSG00000046324	Ermp1	endoplasmic reticulum metallopeptidase 1 [Source:MGI Symbol;Acc:MGI:106250]	19	1.59753	0.0410467	0.475923	2.89951	4.63354
ENSMUSG00000045518	Onecut3	one cut domain, family member 3 [Source:MGI Symbol;Acc:MGI:1891409]	10	-6.21882	0.041204	0.477392	0.542487	0.081164
ENSMUSG00000037138	Aff3	AF4/FMR2 family, member 3 [Source:MGI Symbol;Acc:MGI:106927]	1	-2.05439	0.0412809	0.477763	2.94701	1.42998
ENSMUSG00000076609	Igkc	immunoglobulin kappa constant [Source:MGI Symbol;Acc:MGI:96495]	6	2.18225	0.0412972	0.477763	11.7882	25.742
ENSMUSG00000024338	Psmb8	proteasome (prosome, macropain) subunit, beta type 8 (large multifunctional peptidase 7) [Source:MGI Symbol;Acc:MGI:1346527]	17	1.98638	0.0414431	0.478573	0.964462	1.91694
ENSMUSG00000030772	Dkk3	dickkopf WNT signaling pathway inhibitor 3 [Source:MGI Symbol;Acc:MGI:1354952]	7	1.5555	0.041472	0.478573	546.232	849.665
ENSMUSG00000024502	Jakmip2	janus kinase and microtubule interacting protein 2 [Source:MGI Symbol;Acc:MGI:1923467]	18	-2.50086	0.0414851	0.478573	0.786236	0.310437
ENSMUSG00000040520	Manea	mannosidase, endo-alpha [Source:MGI Symbol;Acc:MGI:2444484]	4	1.62234	0.0414899	0.478573	1.70864	2.77318
ENSMUSG00000021384	Susd3	sushi domain containing 3 [Source:MGI Symbol;Acc:MGI:1913579]	13	-2.0517	0.0416029	0.478641	15.5784	7.57519
ENSMUSG00000064373	Selenop	selenoprotein P [Source:MGI Symbol;Acc:MGI:894288]	15	1.56956	0.0416218	0.478641	17.5909	27.6185
ENSMUSG00000116665	E130310I04Rik	RIKEN cDNA E130310I04 gene [Source:MGI Symbol;Acc:MGI:3046461]	16	-2.31979	0.0416392	0.478641	3.77666	1.61699
ENSMUSG00000103466	Gm37247	predicted gene, 37247 [Source:MGI Symbol;Acc:MGI:5610475]	9	-2.49164	0.0416771	0.478641	2.99	1.15415
ENSMUSG00000051627	H1f4	H1.4 linker histone, cluster member [Source:MGI Symbol;Acc:MGI:1931527]	13	-1.45653	0.0417228	0.478641	76.8226	52.7439
ENSMUSG00000028753	Vwa5b1	von Willebrand factor A domain containing 5B1 [Source:MGI Symbol;Acc:MGI:1922968]	4	-3.28103	0.0417326	0.478641	0.214932	0.06164
ENSMUSG00000051537	Gm5124	predicted pseudogene 5124 [Source:MGI Symbol;Acc:MGI:3643622]	X	-3.31789	0.041742	0.478641	2.09546	0.622628
ENSMUSG00000032180	Tmed1	transmembrane p24 trafficking protein 1 [Source:MGI Symbol;Acc:MGI:106201]	9	1.87798	0.0417459	0.478641	4.13062	7.77742
ENSMUSG00000014905	Dnajb9	DnaJ heat shock protein family (Hsp40) member B9 [Source:MGI Symbol;Acc:MGI:1351618]	12	1.65282	0.0417923	0.478641	15.3833	25.4207
ENSMUSG00000026944	Abca2	ATP-binding cassette, sub-family A (ABC1), member 2 [Source:MGI Symbol;Acc:MGI:99606]	2	1.45742	0.0418021	0.478641	24.9119	36.3109
ENSMUSG00000040560	Wdr7	WD repeat domain 7 [Source:MGI Symbol;Acc:MGI:1860197]	18	-1.51339	0.0418627	0.478964	6.27672	4.14424
ENSMUSG00000019779	Frk	fyn-related kinase [Source:MGI Symbol;Acc:MGI:103265]	10	2.0065	0.0418917	0.478964	0.597275	1.20201
ENSMUSG00000021268	Meg3	maternally expressed 3 [Source:MGI Symbol;Acc:MGI:1202886]	12	-2.17549	0.0419801	0.479386	12.025	5.52483
ENSMUSG00000017677	Wsb1	WD repeat and SOCS box-containing 1 [Source:MGI Symbol;Acc:MGI:1926139]	11	1.52904	0.04199	0.479386	27.1523	41.5187
ENSMUSG00000042677	Zc3h12a	zinc finger CCCH type containing 12A [Source:MGI Symbol;Acc:MGI:2385891]	4	1.54073	0.0420239	0.479422	4.25596	6.55638
ENSMUSG00000004651	Tyr	tyrosinase [Source:MGI Symbol;Acc:MGI:98880]	7	2.6076	0.0421262	0.479839	0.463086	1.21321
ENSMUSG00000036030	Prtg	protogenin [Source:MGI Symbol;Acc:MGI:2444710]	9	1.56469	0.0422332	0.479839	2.50861	3.92089
ENSMUSG00000004347	Pde1c	phosphodiesterase 1C [Source:MGI Symbol;Acc:MGI:108413]	6	1.46502	0.0422711	0.479839	3.01822	4.42104
ENSMUSG00000015970	Chdh	choline dehydrogenase [Source:MGI Symbol;Acc:MGI:1860776]	14	2.00442	0.0422761	0.479839	1.92792	3.87105
ENSMUSG00000040452	Cdh12	cadherin 12 [Source:MGI Symbol;Acc:MGI:109503]	15	-4.74697	0.0422799	0.479839	0.950527	0.195087
ENSMUSG00000042473	Tbc1d8b	TBC1 domain family, member 8B [Source:MGI Symbol;Acc:MGI:1918101]	X	1.85549	0.0422984	0.479839	1.64	3.04368
ENSMUSG00000024764	Naa40	N(alpha)-acetyltransferase 40, NatD catalytic subunit [Source:MGI Symbol;Acc:MGI:1918249]	19	-1.50768	0.0423099	0.479839	2.44403	1.62345
ENSMUSG00000025432	Avil	advillin [Source:MGI Symbol;Acc:MGI:1333798]	10	2.94409	0.042343	0.479839	0.439228	1.30744
ENSMUSG00000044350	Lacc1	laccase domain containing 1 [Source:MGI Symbol;Acc:MGI:2445077]	14	1.89293	0.0423574	0.479839	8.81781	16.7007
ENSMUSG00000042750	Bex2	brain expressed X-linked 2 [Source:MGI Symbol;Acc:MGI:1338017]	X	-2.03199	0.0423677	0.479839	31.2155	15.3171
ENSMUSG00000047721	Bola2	bolA-like 2 (E. coli) [Source:MGI Symbol;Acc:MGI:1913412]	7	1.78466	0.0424028	0.479889	0.935342	1.67297
ENSMUSG00000027993	Trim2	tripartite motif-containing 2 [Source:MGI Symbol;Acc:MGI:1933163]	3	-1.41853	0.042502	0.480433	6.31431	4.45059
ENSMUSG00000056215	Lrguk	leucine-rich repeats and guanylate kinase domain containing [Source:MGI Symbol;Acc:MGI:1921604]	6	-2.37482	0.0425123	0.480433	0.803404	0.334537
ENSMUSG00000040605	Bace2	beta-site APP-cleaving enzyme 2 [Source:MGI Symbol;Acc:MGI:1860440]	16	2.28958	0.0426326	0.481443	0.740673	1.70028
ENSMUSG00000054381	Zfp747	zinc finger protein 747 [Source:MGI Symbol;Acc:MGI:2443581]	7	2.26934	0.042691	0.481754	1.41282	3.20272
ENSMUSG00000010476	Ebf3	early B cell factor 3 [Source:MGI Symbol;Acc:MGI:894289]	7	-2.73891	0.0429462	0.483982	1.74842	0.635613
ENSMUSG00000048960	Prex2	phosphatidylinositol-3,4,5-trisphosphate-dependent Rac exchange factor 2 [Source:MGI Symbol;Acc:MGI:1923385]	1	-2.0587	0.0429504	0.483982	2.20756	1.07046
ENSMUSG00000019917	Septin10	septin 10 [Source:MGI Symbol;Acc:MGI:1918110]	10	1.57553	0.0431286	0.485396	4.55442	7.18164
ENSMUSG00000042350	Arel1	apoptosis resistant E3 ubiquitin protein ligase 1 [Source:MGI Symbol;Acc:MGI:1915747]	12	1.41961	0.0431481	0.485396	5.71263	8.11578
ENSMUSG00000024331	Dsc2	desmocollin 2 [Source:MGI Symbol;Acc:MGI:103221]	18	1.92658	0.0431691	0.485396	2.05636	3.95541
ENSMUSG00000042275	Pelo	pelota mRNA surveillance and ribosome rescue factor [Source:MGI Symbol;Acc:MGI:2145154]	13	1.99226	0.0432254	0.485679	1.53142	3.05952
ENSMUSG00000024842	Cabp4	calcium binding protein 4 [Source:MGI Symbol;Acc:MGI:1920910]	19	-1.85871	0.0433259	0.486458	16.7831	9.01503
ENSMUSG00000096847	Tmem151b	transmembrane protein 151B [Source:MGI Symbol;Acc:MGI:2685169]	17	-2.6677	0.0434182	0.487026	1.04218	0.38415
ENSMUSG00000061601	Pclo	piccolo (presynaptic cytomatrix protein) [Source:MGI Symbol;Acc:MGI:1349390]	5	-1.67817	0.0434388	0.487026	15.417	9.18543
ENSMUSG00000054013	Tmem179	transmembrane protein 179 [Source:MGI Symbol;Acc:MGI:2144891]	12	-2.51117	0.0435537	0.487741	2.10576	0.829203
ENSMUSG00000005514	Por	P450 (cytochrome) oxidoreductase [Source:MGI Symbol;Acc:MGI:97744]	5	1.70472	0.043565	0.487741	22.4517	38.2603
ENSMUSG00000011256	Adam19	a disintegrin and metallopeptidase domain 19 (meltrin beta) [Source:MGI Symbol;Acc:MGI:105377]	11	-3.21514	0.0436926	0.488818	0.305923	0.0967045
ENSMUSG00000031144	Syp	synaptophysin [Source:MGI Symbol;Acc:MGI:98467]	X	-2.04243	0.0437956	0.489621	35.0781	17.1652
ENSMUSG00000005087	Cd44	CD44 antigen [Source:MGI Symbol;Acc:MGI:88338]	2	1.71959	0.0438389	0.489754	51.7277	88.9419
ENSMUSG00000032936	Camkv	CaM kinase-like vesicle-associated [Source:MGI Symbol;Acc:MGI:2384296]	9	-3.0305	0.0439542	0.490578	7.42551	2.4423
ENSMUSG00000061306	Slc38a10	solute carrier family 38, member 10 [Source:MGI Symbol;Acc:MGI:1919305]	11	1.49684	0.0440163	0.490578	22.1713	33.1925
ENSMUSG00000095123	Gm21781	predicted gene, 21781 [Source:MGI Symbol;Acc:MGI:5433945]	10	-1.59601	0.0440261	0.490578	4.45335	2.78524
ENSMUSG00000104713	Gbp6	guanylate binding protein 6 [Source:MGI Symbol;Acc:MGI:2140937]	5	2.56621	0.0441268	0.490578	0.279507	0.726042
ENSMUSG00000056870	Gulp1	GULP, engulfment adaptor PTB domain containing 1 [Source:MGI Symbol;Acc:MGI:1920407]	1	1.64688	0.0441323	0.490578	4.93409	8.13115
ENSMUSG00000020102	Slc16a7	solute carrier family 16 (monocarboxylic acid transporters), member 7 [Source:MGI Symbol;Acc:MGI:1330284]	10	-3.08361	0.044184	0.490578	0.335896	0.106756
ENSMUSG00000059864	Olfr1393	olfactory receptor 1393 [Source:MGI Symbol;Acc:MGI:3031227]	11	-3.06874	0.0441975	0.490578	0.886789	0.278716
ENSMUSG00000023169	Slc38a1	solute carrier family 38, member 1 [Source:MGI Symbol;Acc:MGI:2145895]	15	-1.42984	0.0442248	0.490578	8.83871	6.18005
ENSMUSG00000037730	Mynn	myoneurin [Source:MGI Symbol;Acc:MGI:1931415]	3	-1.45652	0.0442435	0.490578	3.88632	2.6644
ENSMUSG00000040554	Aipl1	aryl hydrocarbon receptor-interacting protein-like 1 [Source:MGI Symbol;Acc:MGI:2148800]	11	-1.9049	0.0442724	0.490578	58.7214	30.8111
ENSMUSG00000102523	Gm37783	predicted gene, 37783 [Source:MGI Symbol;Acc:MGI:5611011]	1	-2.42748	0.0442853	0.490578	3.99941	1.63978
ENSMUSG00000040140	Tdrd6	tudor domain containing 6 [Source:MGI Symbol;Acc:MGI:2679727]	17	-2.5281	0.0443181	0.490578	0.451749	0.179091
ENSMUSG00000055707	Klhl26	kelch-like 26 [Source:MGI Symbol;Acc:MGI:2443079]	8	-1.44851	0.0443211	0.490578	12.5842	8.68592
ENSMUSG00000054640	Slc8a1	solute carrier family 8 (sodium/calcium exchanger), member 1 [Source:MGI Symbol;Acc:MGI:107956]	17	-1.92469	0.0445513	0.492126	2.84343	1.475
ENSMUSG00000043903	Zfp469	zinc finger protein 469 [Source:MGI Symbol;Acc:MGI:2684868]	8	1.85104	0.0445763	0.492126	0.448444	0.828349
ENSMUSG00000058441	Panx2	pannexin 2 [Source:MGI Symbol;Acc:MGI:1890615]	15	-2.52487	0.0445935	0.492126	3.43255	1.34955
ENSMUSG00000087400	Gm15270	predicted gene 15270 [Source:MGI Symbol;Acc:MGI:3705149]	10	1.85484	0.0446497	0.492126	4.18216	7.74286
ENSMUSG00000029810	Tmem176b	transmembrane protein 176B [Source:MGI Symbol;Acc:MGI:1916348]	6	1.47947	0.0446653	0.492126	22.7941	33.7313
ENSMUSG00000036834	Plch1	phospholipase C, eta 1 [Source:MGI Symbol;Acc:MGI:2683547]	3	-1.46761	0.0446736	0.492126	5.75109	3.92025
ENSMUSG00000104145	D130019J16Rik	RIKEN cDNA D130019J16 gene [Source:MGI Symbol;Acc:MGI:2443523]	1	-2.93675	0.0446964	0.492126	2.48908	0.828946
ENSMUSG00000002265	Peg3	paternally expressed 3 [Source:MGI Symbol;Acc:MGI:104748]	7	-1.54488	0.0447129	0.492126	16.2888	10.5412
ENSMUSG00000030823	9130019O22Rik	RIKEN cDNA 9130019O22 gene [Source:MGI Symbol;Acc:MGI:1926171]	7	2.03162	0.0447983	0.49214	1.22175	2.47783
ENSMUSG00000029120	Ppp2r2c	protein phosphatase 2, regulatory subunit B, gamma [Source:MGI Symbol;Acc:MGI:2442660]	5	-2.67251	0.0448116	0.49214	3.26213	1.21222
ENSMUSG00000017376	Nlk	nemo like kinase [Source:MGI Symbol;Acc:MGI:1201387]	11	-1.62418	0.0448284	0.49214	17.1901	10.5736
ENSMUSG00000021360	Gcnt2	glucosaminyl (N-acetyl) transferase 2, I-branching enzyme [Source:MGI Symbol;Acc:MGI:1100870]	13	1.60038	0.0449088	0.49214	5.41186	8.66265
ENSMUSG00000017493	Igfbp4	insulin-like growth factor binding protein 4 [Source:MGI Symbol;Acc:MGI:96439]	11	1.88523	0.044912	0.49214	8.4855	16.0035
ENSMUSG00000025658	Cnksr2	connector enhancer of kinase suppressor of Ras 2 [Source:MGI Symbol;Acc:MGI:2661175]	X	-1.6059	0.044949	0.49214	2.4198	1.50626
ENSMUSG00000086421	Gm14091	predicted gene 14091 [Source:MGI Symbol;Acc:MGI:3650488]	2	-2.51189	0.0449696	0.49214	6.82322	2.70175
ENSMUSG00000036155	Mgat5	mannoside acetylglucosaminyltransferase 5 [Source:MGI Symbol;Acc:MGI:894701]	1	-1.40902	0.0449957	0.49214	8.49805	6.03433
ENSMUSG00000028876	Epha10	Eph receptor A10 [Source:MGI Symbol;Acc:MGI:3586824]	4	-2.5418	0.0450089	0.49214	1.05896	0.412391
ENSMUSG00000002266	Zim1	zinc finger, imprinted 1 [Source:MGI Symbol;Acc:MGI:1341879]	7	-2.56258	0.0450294	0.49214	0.380165	0.146605
ENSMUSG00000030966	Trim21	tripartite motif-containing 21 [Source:MGI Symbol;Acc:MGI:106657]	7	2.35407	0.0451567	0.492738	1.06069	2.49932
ENSMUSG00000053192	Mllt11	myeloid/lymphoid or mixed-lineage leukemia; translocated to, 11 [Source:MGI Symbol;Acc:MGI:1929671]	3	-1.58596	0.0451571	0.492738	7.33319	4.61534
ENSMUSG00000047821	Trim16	tripartite motif-containing 16 [Source:MGI Symbol;Acc:MGI:2137356]	11	2.62736	0.0451787	0.492738	0.861398	2.2651
ENSMUSG00000026674	Ddr2	discoidin domain receptor family, member 2 [Source:MGI Symbol;Acc:MGI:1345277]	1	1.5892	0.0452224	0.492871	14.1609	22.4979
ENSMUSG00000079173	Zan	zonadhesin [Source:MGI Symbol;Acc:MGI:106656]	5	-1.91247	0.0452798	0.493152	0.365856	0.190409
ENSMUSG00000037022	Mmaa	methylmalonic aciduria (cobalamin deficiency) type A [Source:MGI Symbol;Acc:MGI:1923805]	8	1.93752	0.0453161	0.493203	0.948266	1.84363
ENSMUSG00000030768	Disp1	dispatched RND transporter family member 1 [Source:MGI Symbol;Acc:MGI:1916147]	1	1.60615	0.0455475	0.495377	3.09286	4.96442
ENSMUSG00000029576	Radil	Ras association and DIL domains [Source:MGI Symbol;Acc:MGI:2443088]	5	-1.8496	0.0456415	0.496054	2.62263	1.40995
ENSMUSG00000039278	Pcsk1n	proprotein convertase subtilisin/kexin type 1 inhibitor [Source:MGI Symbol;Acc:MGI:1353431]	X	-2.04227	0.0457799	0.497212	20.7618	10.1479
ENSMUSG00000078949	R3hdml	R3H domain containing-like [Source:MGI Symbol;Acc:MGI:3650937]	2	1.86479	0.0458456	0.497279	163.71	305.313
ENSMUSG00000001034	Mapk7	mitogen-activated protein kinase 7 [Source:MGI Symbol;Acc:MGI:1346347]	11	1.62809	0.0458647	0.497279	2.33379	3.79804
ENSMUSG00000095930	Nim1k	NIM1 serine/threonine protein kinase [Source:MGI Symbol;Acc:MGI:2442399]	13	-1.76892	0.0458816	0.497279	3.91708	2.20887
ENSMUSG00000034324	Tmem132c	transmembrane protein 132C [Source:MGI Symbol;Acc:MGI:2443061]	5	2.18393	0.0459228	0.49738	1.07857	2.35757
ENSMUSG00000038296	Galnt18	polypeptide N-acetylgalactosaminyltransferase 18 [Source:MGI Symbol;Acc:MGI:2446239]	7	1.47386	0.0459743	0.497593	15.2679	22.5034
ENSMUSG00000031344	Gabrq	gamma-aminobutyric acid (GABA) A receptor, subunit theta [Source:MGI Symbol;Acc:MGI:1888498]	X	4.92287	0.0460525	0.49781	0.0992004	0.496676
ENSMUSG00000024621	Csf1r	colony stimulating factor 1 receptor [Source:MGI Symbol;Acc:MGI:1339758]	18	1.84592	0.0460581	0.49781	0.947437	1.75877
ENSMUSG00000038437	Mllt6	myeloid/lymphoid or mixed-lineage leukemia; translocated to, 6 [Source:MGI Symbol;Acc:MGI:1935145]	11	-1.48352	0.0461476	0.498267	39.9888	26.9526
ENSMUSG00000017830	Dhx58	DEXH (Asp-Glu-X-His) box polypeptide 58 [Source:MGI Symbol;Acc:MGI:1931560]	11	2.36862	0.0461642	0.498267	0.537255	1.27102
ENSMUSG00000050592	Fam78a	family with sequence similarity 78, member A [Source:MGI Symbol;Acc:MGI:2443569]	2	-2.43766	0.0462306	0.498639	0.969563	0.391653
ENSMUSG00000001627	Ifrd1	interferon-related developmental regulator 1 [Source:MGI Symbol;Acc:MGI:1316717]	12	1.60242	0.0462664	0.498642	46.6836	74.811
ENSMUSG00000108614	2610306O10Rik	RIKEN cDNA 2610306O10 gene [Source:MGI Symbol;Acc:MGI:1917710]	7	2.80329	0.0463296	0.498642	4.23722	11.9477
ENSMUSG00000000282	Mnt	max binding protein [Source:MGI Symbol;Acc:MGI:109150]	11	-1.46266	0.0463811	0.498642	14.0592	9.62212
ENSMUSG00000035653	Lrfn5	leucine rich repeat and fibronectin type III domain containing 5 [Source:MGI Symbol;Acc:MGI:2144814]	12	-3.42798	0.0463838	0.498642	0.611087	0.174823
ENSMUSG00000032557	Uba5	ubiquitin-like modifier activating enzyme 5 [Source:MGI Symbol;Acc:MGI:1913913]	9	1.44922	0.0463905	0.498642	3.03385	4.39684
ENSMUSG00000052516	Robo2	roundabout guidance receptor 2 [Source:MGI Symbol;Acc:MGI:1890110]	16	-1.40488	0.0464249	0.498668	3.08105	2.19303
ENSMUSG00000022123	Scel	sciellin [Source:MGI Symbol;Acc:MGI:1891228]	14	1.62347	0.0465656	0.499836	30.5411	49.5924
ENSMUSG00000018486	Wnt9b	wingless-type MMTV integration site family, member 9B [Source:MGI Symbol;Acc:MGI:1197020]	11	-3.78904	0.0466459	0.500253	1.14605	0.30001
ENSMUSG00000052949	Rnf157	ring finger protein 157 [Source:MGI Symbol;Acc:MGI:2442484]	11	-1.74135	0.0466775	0.500253	9.74185	5.58941
ENSMUSG00000020538	Srebf1	sterol regulatory element binding transcription factor 1 [Source:MGI Symbol;Acc:MGI:107606]	11	1.84698	0.0467788	0.500253	38.7542	71.5875
ENSMUSG00000058392	Rrp1b	ribosomal RNA processing 1B [Source:MGI Symbol;Acc:MGI:1919712]	17	-1.73079	0.046793	0.500253	9.10304	5.25041
ENSMUSG00000043298	Smco3	single-pass membrane protein with coiled-coil domains 3 [Source:MGI Symbol;Acc:MGI:2443451]	6	2.52356	0.0468898	0.500253	1.14657	2.89413
ENSMUSG00000022099	Dmtn	dematin actin binding protein [Source:MGI Symbol;Acc:MGI:99670]	14	-1.80871	0.0468946	0.500253	1.629	0.899471
ENSMUSG00000024887	Asah2	N-acylsphingosine amidohydrolase 2 [Source:MGI Symbol;Acc:MGI:1859310]	19	1.7425	0.046913	0.500253	0.484881	0.845082
ENSMUSG00000040435	Ppp1r15a	protein phosphatase 1, regulatory subunit 15A [Source:MGI Symbol;Acc:MGI:1927072]	7	1.91377	0.0469696	0.500253	85.9234	164.449
ENSMUSG00000035258	Abi3bp	ABI family member 3 binding protein [Source:MGI Symbol;Acc:MGI:2444583]	16	1.5972	0.0469716	0.500253	23.7443	37.9262
ENSMUSG00000112323	Gm32828	predicted gene, 32828 [Source:MGI Symbol;Acc:MGI:5591987]	12	-3.95709	0.0469718	0.500253	0.802254	0.190257
ENSMUSG00000071181	3830408C21Rik	RIKEN cDNA 3830408C21 gene [Source:MGI Symbol;Acc:MGI:1917940]	13	-2.18516	0.0470031	0.500253	0.86206	0.388642
ENSMUSG00000097415	AU020206	expressed sequence AU020206 [Source:MGI Symbol;Acc:MGI:2142134]	7	2.00358	0.0470169	0.500253	0.548503	1.10884
ENSMUSG00000014353	Tmem87b	transmembrane protein 87B [Source:MGI Symbol;Acc:MGI:1919727]	2	1.43755	0.047034	0.500253	5.1287	7.36973
ENSMUSG00000007888	Crlf1	cytokine receptor-like factor 1 [Source:MGI Symbol;Acc:MGI:1340030]	8	-3.16346	0.0470529	0.500253	0.992693	0.305226
ENSMUSG00000103657	Gm37204	predicted gene, 37204 [Source:MGI Symbol;Acc:MGI:5610432]	9	-1.98582	0.0471181	0.500438	1.116	0.565924
ENSMUSG00000005640	Insrr	insulin receptor-related receptor [Source:MGI Symbol;Acc:MGI:1346037]	3	3.16511	0.0471344	0.500438	0.601621	1.9144
ENSMUSG00000034912	Mdga2	MAM domain containing glycosylphosphatidylinositol anchor 2 [Source:MGI Symbol;Acc:MGI:2444706]	12	-2.68716	0.0472442	0.501236	1.53399	0.568385
ENSMUSG00000021591	Glrx	glutaredoxin [Source:MGI Symbol;Acc:MGI:2135625]	13	2.77674	0.0473148	0.501236	0.662145	1.83564
ENSMUSG00000022055	Nefl	neurofilament, light polypeptide [Source:MGI Symbol;Acc:MGI:97313]	14	-2.66155	0.0473346	0.501236	26.6224	9.9899
ENSMUSG00000008658	Rbfox1	RNA binding protein, fox-1 homolog (C. elegans) 1 [Source:MGI Symbol;Acc:MGI:1926224]	16	-1.94294	0.0473545	0.501236	2.29945	1.17459
ENSMUSG00000104118	Gm37298	predicted gene, 37298 [Source:MGI Symbol;Acc:MGI:5610526]	1	-2.58431	0.0473699	0.501236	1.31335	0.498848
ENSMUSG00000056413	Adap1	ArfGAP with dual PH domains 1 [Source:MGI Symbol;Acc:MGI:2442201]	5	-2.57193	0.0474791	0.50205	1.04811	0.397971
ENSMUSG00000031210	Gpr165	G protein-coupled receptor 165 [Source:MGI Symbol;Acc:MGI:1923456]	X	2.15381	0.0475968	0.502955	0.596012	1.2951
ENSMUSG00000029822	Osbpl3	oxysterol binding protein-like 3 [Source:MGI Symbol;Acc:MGI:1918970]	6	1.50613	0.0477176	0.50389	2.0954	3.15498
ENSMUSG00000092274	Neat1	nuclear paraspeckle assembly transcript 1 (non-protein coding) [Source:MGI Symbol;Acc:MGI:1914211]	19	1.44948	0.0477795	0.503915	22.5993	32.7592
ENSMUSG00000037169	Mycn	v-myc avian myelocytomatosis viral related oncogene, neuroblastoma derived [Source:MGI Symbol;Acc:MGI:97357]	12	2.04849	0.0477845	0.503915	2.4447	5.02122
ENSMUSG00000026407	Cacna1s	calcium channel, voltage-dependent, L type, alpha 1S subunit [Source:MGI Symbol;Acc:MGI:88294]	1	-3.93868	0.0478263	0.504016	1.44392	0.362715
ENSMUSG00000054150	Syne3	spectrin repeat containing, nuclear envelope family member 3 [Source:MGI Symbol;Acc:MGI:2442408]	12	-1.62936	0.0478726	0.504163	20.4576	12.5492
ENSMUSG00000119520	U4	U4 spliceosomal RNA [Source:RFAM;Acc:RF00015]	5	-2.18513	0.0479549	0.50451	36.831	16.8008
ENSMUSG00000040447	Spns2	spinster homolog 2 [Source:MGI Symbol;Acc:MGI:2384936]	11	-2.24843	0.0479815	0.50451	1.11271	0.490473
ENSMUSG00000032908	Sgpp2	sphingosine-1-phosphate phosphatase 2 [Source:MGI Symbol;Acc:MGI:3589109]	1	-2.62663	0.0480203	0.50451	1.29482	0.485333
ENSMUSG00000028655	Mfsd2a	major facilitator superfamily domain containing 2A [Source:MGI Symbol;Acc:MGI:1923824]	4	2.27726	0.0480347	0.50451	4.1722	9.5158
ENSMUSG00000031574	Star	steroidogenic acute regulatory protein [Source:MGI Symbol;Acc:MGI:102760]	8	-2.2961	0.0482257	0.50613	1.02754	0.439834
ENSMUSG00000091476	Catspere2	cation channel sperm associated auxiliary subunit epsilon 2 [Source:MGI Symbol;Acc:MGI:5589632]	1	-1.9156	0.048303	0.50613	2.4702	1.28555
ENSMUSG00000100252	Mir124-2hg	Mir124-2 host gene (non-protein coding) [Source:MGI Symbol;Acc:MGI:1917691]	3	-2.02626	0.0483216	0.50613	31.7838	15.6784
ENSMUSG00000075284	Wipf1	WAS/WASL interacting protein family, member 1 [Source:MGI Symbol;Acc:MGI:2178801]	2	2.28018	0.0483704	0.50613	0.180383	0.418756
ENSMUSG00000034574	Daam1	dishevelled associated activator of morphogenesis 1 [Source:MGI Symbol;Acc:MGI:1914596]	12	1.42466	0.0483717	0.50613	28.8667	41.1238
ENSMUSG00000036896	C1qc	complement component 1, q subcomponent, C chain [Source:MGI Symbol;Acc:MGI:88225]	4	2.59625	0.0483834	0.50613	0.944827	2.47801
ENSMUSG00000059146	Ntrk3	neurotrophic tyrosine kinase, receptor, type 3 [Source:MGI Symbol;Acc:MGI:97385]	7	-2.57775	0.0485444	0.50737	0.639092	0.2464
ENSMUSG00000026342	Slc35f5	solute carrier family 35, member F5 [Source:MGI Symbol;Acc:MGI:1921400]	1	1.59453	0.048567	0.50737	9.25466	14.7414
ENSMUSG00000018012	Rac3	Rac family small GTPase 3 [Source:MGI Symbol;Acc:MGI:2180784]	11	-1.92455	0.0487457	0.508608	6.18961	3.1856
ENSMUSG00000026893	Gca	grancalcin [Source:MGI Symbol;Acc:MGI:1918521]	2	-2.37189	0.0487506	0.508608	1.94943	0.814908
ENSMUSG00000101840	Gm28294	predicted gene 28294 [Source:MGI Symbol;Acc:MGI:5579000]	1	-3.31864	0.0487971	0.508737	5.16193	1.48448
ENSMUSG00000104078	Gm37023	predicted gene, 37023 [Source:MGI Symbol;Acc:MGI:5610251]	9	-2.61128	0.0488281	0.508737	1.54627	0.578191
ENSMUSG00000112411	Gm19337	predicted gene, 19337 [Source:MGI Symbol;Acc:MGI:5011522]	10	1.96217	0.0489665	0.509791	1.07744	2.12625
ENSMUSG00000024261	Syt4	synaptotagmin IV [Source:MGI Symbol;Acc:MGI:101759]	18	-3.62204	0.0489946	0.509791	6.93846	1.9054
ENSMUSG00000060924	Csmd1	CUB and Sushi multiple domains 1 [Source:MGI Symbol;Acc:MGI:2137383]	8	-3.10992	0.0490433	0.509959	0.495876	0.158536
ENSMUSG00000118038	Gm9895	predicted gene 9895 [Source:MGI Symbol;Acc:MGI:3642802]	19	-3.15145	0.0490795	0.509996	2.09248	0.618226
ENSMUSG00000025921	Rdh10	retinol dehydrogenase 10 (all-trans) [Source:MGI Symbol;Acc:MGI:1924238]	1	1.53933	0.0491277	0.510158	11.618	17.8678
ENSMUSG00000112067	Gm48015	predicted gene, 48015 [Source:MGI Symbol;Acc:MGI:6097323]	12	1.95091	0.0492659	0.511013	1.6293	3.19665
ENSMUSG00000079499	6530402F18Rik	RIKEN cDNA 6530402F18 gene [Source:MGI Symbol;Acc:MGI:1923470]	2	-1.75178	0.0492756	0.511013	5.19855	2.95886
ENSMUSG00000036275	9530068E07Rik	RIKEN cDNA 9530068E07 gene [Source:MGI Symbol;Acc:MGI:2654705]	11	1.44617	0.0493953	0.511915	25.0475	36.2269
ENSMUSG00000047767	Atg16l2	autophagy related 16-like 2 (S. cerevisiae) [Source:MGI Symbol;Acc:MGI:1920933]	7	1.50767	0.0495044	0.512705	1.50308	2.26811
ENSMUSG00000020894	Vamp2	vesicle-associated membrane protein 2 [Source:MGI Symbol;Acc:MGI:1313277]	11	-1.52512	0.0496846	0.51423	50.7362	33.2556
ENSMUSG00000004113	Cacna1b	calcium channel, voltage-dependent, N type, alpha 1B subunit [Source:MGI Symbol;Acc:MGI:88296]	2	-1.8533	0.0497936	0.515018	1.72935	0.929564
ENSMUSG00000040613	Apobec1	apolipoprotein B mRNA editing enzyme, catalytic polypeptide 1 [Source:MGI Symbol;Acc:MGI:103298]	6	3.51985	0.0498661	0.515427	0.211938	0.771362
ENSMUSG00000045991	Onecut2	one cut domain, family member 2 [Source:MGI Symbol;Acc:MGI:1891408]	18	-3.29066	0.0500684	0.517175	0.201715	0.0597593
ENSMUSG00000039997	Ifi203	interferon activated gene 203 [Source:MGI Symbol;Acc:MGI:96428]	1	3.98491	0.0501151	0.517315	0.539899	2.14923
ENSMUSG00000044674	Fzd1	frizzled class receptor 1 [Source:MGI Symbol;Acc:MGI:1196625]	5	2.01437	0.0501875	0.517596	4.28209	8.63779
ENSMUSG00000112945	Gm32151	predicted gene, 32151 [Source:MGI Symbol;Acc:MGI:5591310]	12	2.29563	0.0502086	0.517596	1.1588	2.71006
ENSMUSG00000043207	Zmpste24	zinc metallopeptidase, STE24 [Source:MGI Symbol;Acc:MGI:1890508]	4	1.49025	0.0502809	0.518	2.57586	3.83825
ENSMUSG00000027309	4930402H24Rik	RIKEN cDNA 4930402H24 gene [Source:MGI Symbol;Acc:MGI:1923029]	2	-1.46381	0.0503811	0.518507	4.72306	3.22549
ENSMUSG00000104132	Gm36952	predicted gene, 36952 [Source:MGI Symbol;Acc:MGI:5610180]	1	-2.56109	0.0504005	0.518507	0.977954	0.374597
ENSMUSG00000054000	Tusc1	tumor suppressor candidate 1 [Source:MGI Symbol;Acc:MGI:2684283]	4	1.81554	0.0504328	0.518507	3.30973	6.03014
ENSMUSG00000070044	Fam149a	family with sequence similarity 149, member A [Source:MGI Symbol;Acc:MGI:2387177]	8	-1.55007	0.0504703	0.518507	6.17626	3.97859
ENSMUSG00000103614	Gm37949	predicted gene, 37949 [Source:MGI Symbol;Acc:MGI:5611177]	1	-2.66826	0.0505101	0.518507	1.19029	0.428454
ENSMUSG00000022791	Tnk2	tyrosine kinase, non-receptor, 2 [Source:MGI Symbol;Acc:MGI:1858308]	16	-1.43931	0.0505294	0.518507	14.2972	9.93021
ENSMUSG00000028039	Efna3	ephrin A3 [Source:MGI Symbol;Acc:MGI:106644]	3	-2.95651	0.0505996	0.518886	0.481102	0.155788
ENSMUSG00000063234	Gpr84	G protein-coupled receptor 84 [Source:MGI Symbol;Acc:MGI:1934129]	15	-3.34252	0.0507213	0.51948	1.03689	0.292944
ENSMUSG00000037411	Serpine1	serine (or cysteine) peptidase inhibitor, clade E, member 1 [Source:MGI Symbol;Acc:MGI:97608]	5	2.59041	0.050724	0.51948	62.2047	161.136
ENSMUSG00000084826	AI847159	expressed sequence AI847159 [Source:MGI Symbol;Acc:MGI:3528181]	2	-2.04014	0.0507637	0.519481	11.7171	5.71703
ENSMUSG00000061751	Kalrn	kalirin, RhoGEF kinase [Source:MGI Symbol;Acc:MGI:2685385]	16	-1.99852	0.0508573	0.519481	1.03351	0.515872
ENSMUSG00000025656	Arhgef9	CDC42 guanine nucleotide exchange factor (GEF) 9 [Source:MGI Symbol;Acc:MGI:2442233]	X	-1.37286	0.0508779	0.519481	7.90907	5.76151
ENSMUSG00000017561	Crlf3	cytokine receptor-like factor 3 [Source:MGI Symbol;Acc:MGI:1860086]	11	-1.774	0.0508821	0.519481	8.76562	4.93078
ENSMUSG00000021221	Dpf3	D4, zinc and double PHD fingers, family 3 [Source:MGI Symbol;Acc:MGI:1917377]	12	-1.57548	0.050905	0.519481	26.3614	16.7239
ENSMUSG00000022270	Retreg1	reticulophagy regulator 1 [Source:MGI Symbol;Acc:MGI:1913520]	15	1.49802	0.0509243	0.519481	9.39526	14.0697
ENSMUSG00000017734	Dbndd2	dysbindin (dystrobrevin binding protein 1) domain containing 2 [Source:MGI Symbol;Acc:MGI:106562]	2	-2.19832	0.0509569	0.519481	1.31753	0.590362
ENSMUSG00000070498	Tmem132b	transmembrane protein 132B [Source:MGI Symbol;Acc:MGI:3609245]	5	1.59716	0.0510101	0.51959	3.434	5.48972
ENSMUSG00000019762	Iyd	iodotyrosine deiodinase [Source:MGI Symbol;Acc:MGI:1917587]	10	1.96862	0.0510341	0.51959	3.38804	6.67284
ENSMUSG00000102715	Gm6209	predicted gene 6209 [Source:MGI Symbol;Acc:MGI:3643374]	3	2.62226	0.0510776	0.519694	0.764742	2.01811
ENSMUSG00000024270	Slc39a6	solute carrier family 39 (metal ion transporter), member 6 [Source:MGI Symbol;Acc:MGI:2147279]	18	1.8956	0.0511202	0.519788	15.4487	29.27
ENSMUSG00000010051	Hyal1	hyaluronoglucosaminidase 1 [Source:MGI Symbol;Acc:MGI:96298]	9	1.84913	0.051179	0.520048	1.97913	3.64945
ENSMUSG00000019861	Gopc	golgi associated PDZ and coiled-coil motif containing [Source:MGI Symbol;Acc:MGI:2149946]	10	1.43259	0.0512235	0.520161	2.28366	3.26835
ENSMUSG00000028173	Wls	wntless WNT ligand secretion mediator [Source:MGI Symbol;Acc:MGI:1915401]	3	1.62149	0.0513103	0.520447	14.5955	23.666
ENSMUSG00000026820	Ptges2	prostaglandin E synthase 2 [Source:MGI Symbol;Acc:MGI:1917592]	2	-1.55239	0.0513437	0.520447	3.71237	2.38893
ENSMUSG00000019889	Ptprk	protein tyrosine phosphatase, receptor type, K [Source:MGI Symbol;Acc:MGI:103310]	10	1.39525	0.0514019	0.520447	6.60096	9.21071
ENSMUSG00000052056	Zfp217	zinc finger protein 217 [Source:MGI Symbol;Acc:MGI:2685408]	2	1.56256	0.0514084	0.520447	3.93037	6.13513
ENSMUSG00000035356	Nfkbiz	nuclear factor of kappa light polypeptide gene enhancer in B cells inhibitor, zeta [Source:MGI Symbol;Acc:MGI:1931595]	16	2.56497	0.0514183	0.520447	30.7973	79.0055
ENSMUSG00000033502	Cdc14a	CDC14 cell division cycle 14A [Source:MGI Symbol;Acc:MGI:2442676]	3	-1.77361	0.0515059	0.520997	2.25025	1.26566
ENSMUSG00000033857	Engase	endo-beta-N-acetylglucosaminidase [Source:MGI Symbol;Acc:MGI:2443788]	11	-2.02505	0.0515877	0.521486	1.47684	0.726455
ENSMUSG00000029056	Pank4	pantothenate kinase 4 [Source:MGI Symbol;Acc:MGI:2387466]	4	-1.43967	0.0516542	0.521821	13.8414	9.60487
ENSMUSG00000036745	Ttll7	tubulin tyrosine ligase-like family, member 7 [Source:MGI Symbol;Acc:MGI:1918142]	3	-1.75065	0.0517327	0.521946	3.04377	1.7342
ENSMUSG00000023336	Wfdc1	WAP four-disulfide core domain 1 [Source:MGI Symbol;Acc:MGI:1915116]	8	2.21846	0.0517334	0.521946	5.75082	12.78
ENSMUSG00000066595	Flvcr1	feline leukemia virus subgroup C cellular receptor 1 [Source:MGI Symbol;Acc:MGI:2444881]	1	1.41996	0.0518017	0.522131	5.48214	7.77856
ENSMUSG00000019971	Cep290	centrosomal protein 290 [Source:MGI Symbol;Acc:MGI:2384917]	10	-1.51315	0.0518289	0.522131	13.8545	9.15244
ENSMUSG00000020014	Cfap54	cilia and flagella associated protein 54 [Source:MGI Symbol;Acc:MGI:1922208]	10	-2.57103	0.051852	0.522131	0.912614	0.353417
ENSMUSG00000027270	Lamp5	lysosomal-associated membrane protein family, member 5 [Source:MGI Symbol;Acc:MGI:1923411]	2	-5.08838	0.0518893	0.52217	2.92713	0.564405
ENSMUSG00000002319	Ipo4	importin 4 [Source:MGI Symbol;Acc:MGI:1923001]	14	1.53775	0.0520483	0.523432	2.65798	4.0912
ENSMUSG00000031492	Chrnb3	cholinergic receptor, nicotinic, beta polypeptide 3 [Source:MGI Symbol;Acc:MGI:106212]	8	-2.64848	0.0520857	0.523471	1.84661	0.690327
ENSMUSG00000026764	Kif5c	kinesin family member 5C [Source:MGI Symbol;Acc:MGI:1098269]	2	-1.37921	0.0521417	0.523697	24.1619	17.5161
ENSMUSG00000029108	Pcdh7	protocadherin 7 [Source:MGI Symbol;Acc:MGI:1860487]	5	1.46965	0.0523293	0.524885	15.6202	22.9549
ENSMUSG00000034059	Ypel4	yippee like 4 [Source:MGI Symbol;Acc:MGI:3605071]	2	-1.54276	0.0523526	0.524885	6.04136	3.9104
ENSMUSG00000090546	Cdr1	cerebellar degeneration related antigen 1 [Source:MGI Symbol;Acc:MGI:88359]	X	-2.51949	0.05238	0.524885	1.95028	0.765573
ENSMUSG00000004864	Mapk13	mitogen-activated protein kinase 13 [Source:MGI Symbol;Acc:MGI:1346864]	17	4.32724	0.0523944	0.524885	0.204121	0.908361
ENSMUSG00000111375	Btbd8	BTB (POZ) domain containing 8 [Source:MGI Symbol;Acc:MGI:3646208]	5	-1.59105	0.0524295	0.5249	4.8688	3.05494
ENSMUSG00000012017	Scarf2	scavenger receptor class F, member 2 [Source:MGI Symbol;Acc:MGI:1858430]	16	1.6931	0.0525141	0.52541	25.2715	42.7971
ENSMUSG00000095115	Itpripl2	inositol 1,4,5-triphosphate receptor interacting protein-like 2 [Source:MGI Symbol;Acc:MGI:2442416]	7	1.7179	0.0525877	0.525545	1.73181	2.96916
ENSMUSG00000039735	Fnbp1l	formin binding protein 1-like [Source:MGI Symbol;Acc:MGI:1925642]	3	1.50217	0.0525949	0.525545	2.9463	4.42448
ENSMUSG00000069516	Lyz2	lysozyme 2 [Source:MGI Symbol;Acc:MGI:96897]	10	2.08759	0.0527149	0.52627	3.558	7.46963
ENSMUSG00000037143	Cfap61	cilia and flagella associated protein 61 [Source:MGI Symbol;Acc:MGI:1926024]	2	-2.02642	0.0527349	0.52627	1.01866	0.50049
ENSMUSG00000026797	Stxbp1	syntaxin binding protein 1 [Source:MGI Symbol;Acc:MGI:107363]	2	-1.74459	0.0528261	0.526845	61.9399	35.4948
ENSMUSG00000036992	Nxt1	NTF2-related export protein 1 [Source:MGI Symbol;Acc:MGI:1929619]	2	1.84404	0.0529531	0.527522	3.49925	6.42326
ENSMUSG00000047246	H2bc6	H2B clustered histone 6 [Source:MGI Symbol;Acc:MGI:2448380]	13	-1.87227	0.052986	0.527522	2.88412	1.53168
ENSMUSG00000062760	Shisal1	shisa like 1 [Source:MGI Symbol;Acc:MGI:1919551]	15	-1.52004	0.0530266	0.527522	4.9017	3.2286
ENSMUSG00000038518	Jarid2	jumonji, AT rich interactive domain 2 [Source:MGI Symbol;Acc:MGI:104813]	13	-1.43526	0.0530291	0.527522	10.0043	6.97232
ENSMUSG00000051043	Gprc5c	G protein-coupled receptor, family C, group 5, member C [Source:MGI Symbol;Acc:MGI:1917605]	11	1.68908	0.0531636	0.528231	6.16103	10.4121
ENSMUSG00000021364	Elovl2	elongation of very long chain fatty acids (FEN1/Elo2, SUR4/Elo3, yeast)-like 2 [Source:MGI Symbol;Acc:MGI:1858960]	13	-1.977	0.0531725	0.528231	4.43053	2.23084
ENSMUSG00000025235	Bbs4	Bardet-Biedl syndrome 4 (human) [Source:MGI Symbol;Acc:MGI:2143311]	9	-1.55045	0.0532019	0.528231	8.22081	5.29566
ENSMUSG00000062296	Trank1	tetratricopeptide repeat and ankyrin repeat containing 1 [Source:MGI Symbol;Acc:MGI:1341834]	9	-2.22487	0.0533088	0.528627	4.64976	2.08744
ENSMUSG00000015599	Ttbk1	tau tubulin kinase 1 [Source:MGI Symbol;Acc:MGI:2147036]	17	-2.81307	0.0533094	0.528627	1.64765	0.583301
ENSMUSG00000091661	Gm17021	predicted gene 17021 [Source:MGI Symbol;Acc:MGI:4937848]	9	-2.38546	0.0534412	0.529597	3.13888	1.30364
ENSMUSG00000079111	Kdelr2	KDEL (Lys-Asp-Glu-Leu) endoplasmic reticulum protein retention receptor 2 [Source:MGI Symbol;Acc:MGI:1914163]	5	1.55204	0.0534778	0.529623	13.3556	20.7103
ENSMUSG00000040543	Pitpnm3	PITPNM family member 3 [Source:MGI Symbol;Acc:MGI:2685726]	11	-1.8958	0.0536077	0.530574	21.8859	11.5403
ENSMUSG00000020143	Dock2	dedicator of cyto-kinesis 2 [Source:MGI Symbol;Acc:MGI:2149010]	11	2.29119	0.0536595	0.53075	0.157272	0.364223
ENSMUSG00000045658	Pid1	phosphotyrosine interaction domain containing 1 [Source:MGI Symbol;Acc:MGI:2138391]	1	-2.66303	0.0537292	0.531103	0.654202	0.241775
ENSMUSG00000051396	Gm45902	predicted gene 45902 [Source:MGI Symbol;Acc:MGI:5805017]	2	-1.68167	0.0538527	0.531987	3.11334	1.85354
ENSMUSG00000033597	Caskin1	CASK interacting protein 1 [Source:MGI Symbol;Acc:MGI:2442952]	17	-1.5591	0.0538885	0.532004	6.33277	4.05872
ENSMUSG00000034450	Gulo	gulonolactone (L-) oxidase [Source:MGI Symbol;Acc:MGI:1353434]	14	-2.14547	0.0539576	0.532174	2.24686	1.05092
ENSMUSG00000022676	Snai2	snail family zinc finger 2 [Source:MGI Symbol;Acc:MGI:1096393]	16	2.67853	0.0539739	0.532174	0.393375	1.06724
ENSMUSG00000021958	Pinx1	PIN2/TERF1 interacting, telomerase inhibitor 1 [Source:MGI Symbol;Acc:MGI:1919650]	14	1.66248	0.0540798	0.532883	2.77372	4.60888
ENSMUSG00000018589	Glra2	glycine receptor, alpha 2 subunit [Source:MGI Symbol;Acc:MGI:95748]	X	-4.1423	0.0541971	0.533542	0.805937	0.185055
ENSMUSG00000041515	Irf8	interferon regulatory factor 8 [Source:MGI Symbol;Acc:MGI:96395]	8	-1.77264	0.054215	0.533542	2.2683	1.27502
ENSMUSG00000034810	Scn7a	sodium channel, voltage-gated, type VII, alpha [Source:MGI Symbol;Acc:MGI:102965]	2	-3.23053	0.0542897	0.53394	0.792391	0.240769
ENSMUSG00000041920	Slc16a6	solute carrier family 16 (monocarboxylic acid transporters), member 6 [Source:MGI Symbol;Acc:MGI:2144585]	11	-1.83141	0.0543739	0.534432	12.0426	6.56779
ENSMUSG00000038637	Lrrc56	leucine rich repeat containing 56 [Source:MGI Symbol;Acc:MGI:1917802]	7	-1.98296	0.0544849	0.535185	1.18485	0.600679
ENSMUSG00000021285	Ppp1r13b	protein phosphatase 1, regulatory subunit 13B [Source:MGI Symbol;Acc:MGI:1336199]	12	-1.37027	0.0547184	0.536899	20.5552	15.0035
ENSMUSG00000029406	Pitpnm2	phosphatidylinositol transfer protein, membrane-associated 2 [Source:MGI Symbol;Acc:MGI:1336192]	5	-1.50609	0.0547469	0.536899	5.35706	3.55374
ENSMUSG00000028469	Npr2	natriuretic peptide receptor 2 [Source:MGI Symbol;Acc:MGI:97372]	4	1.42288	0.0547668	0.536899	7.87558	11.2151
ENSMUSG00000033308	Dpyd	dihydropyrimidine dehydrogenase [Source:MGI Symbol;Acc:MGI:2139667]	3	2.52373	0.0548103	0.536899	0.121319	0.30379
ENSMUSG00000033488	Cryzl2	crystallin zeta like 2 [Source:MGI Symbol;Acc:MGI:2448516]	1	1.90674	0.0548312	0.536899	1.84339	3.51784
ENSMUSG00000004952	Rasa4	RAS p21 protein activator 4 [Source:MGI Symbol;Acc:MGI:1858600]	5	1.40456	0.0548816	0.537056	3.45305	4.85183
ENSMUSG00000036510	Cdh8	cadherin 8 [Source:MGI Symbol;Acc:MGI:107434]	8	-3.05851	0.0549669	0.537158	1.04421	0.336275
ENSMUSG00000097743	Gm16973	predicted gene, 16973 [Source:MGI Symbol;Acc:MGI:4439897]	14	-1.89473	0.054991	0.537158	2.06509	1.07471
ENSMUSG00000058709	Egln2	egl-9 family hypoxia-inducible factor 2 [Source:MGI Symbol;Acc:MGI:1932287]	7	1.44457	0.0549952	0.537158	7.31265	10.5784
ENSMUSG00000038893	Fam117a	family with sequence similarity 117, member A [Source:MGI Symbol;Acc:MGI:2144564]	11	1.50724	0.0551203	0.538017	3.39313	5.12165
ENSMUSG00000041301	Cftr	cystic fibrosis transmembrane conductance regulator [Source:MGI Symbol;Acc:MGI:88388]	6	2.46377	0.0551521	0.538017	0.151641	0.373973
ENSMUSG00000001507	Itga3	integrin alpha 3 [Source:MGI Symbol;Acc:MGI:96602]	11	1.46671	0.055201	0.538158	21.9863	32.2476
ENSMUSG00000058427	Cxcl2	chemokine (C-X-C motif) ligand 2 [Source:MGI Symbol;Acc:MGI:1340094]	5	2.60182	0.0552368	0.538171	10.1694	26.4588
ENSMUSG00000103722	2700078F05Rik	RIKEN cDNA 2700078F05 gene [Source:MGI Symbol;Acc:MGI:1919876]	1	-1.97563	0.0552867	0.538322	1.28895	0.650068
ENSMUSG00000052957	Gas1	growth arrest specific 1 [Source:MGI Symbol;Acc:MGI:95655]	13	2.07773	0.0554008	0.539097	6.6702	13.8805
ENSMUSG00000021087	Rtn1	reticulon 1 [Source:MGI Symbol;Acc:MGI:1933947]	12	-1.5058	0.0555582	0.539989	14.069	9.33596
ENSMUSG00000027800	Tm4sf1	transmembrane 4 superfamily member 1 [Source:MGI Symbol;Acc:MGI:104678]	3	2.01455	0.0555617	0.539989	52.1867	105.124
ENSMUSG00000037190	Cyb561d2	cytochrome b-561 domain containing 2 [Source:MGI Symbol;Acc:MGI:1929280]	9	2.36677	0.0556005	0.54003	0.825093	1.9646
ENSMUSG00000084788	Gm11342	predicted gene 11342 [Source:MGI Symbol;Acc:MGI:3652098]	13	-2.1964	0.0556477	0.540153	4.74875	2.14617
ENSMUSG00000030283	St8sia1	ST8 alpha-N-acetyl-neuraminide alpha-2,8-sialyltransferase 1 [Source:MGI Symbol;Acc:MGI:106011]	6	-1.64846	0.0557162	0.540482	6.78003	4.10775
ENSMUSG00000001366	Fbxo9	f-box protein 9 [Source:MGI Symbol;Acc:MGI:1918788]	9	-1.43928	0.0558341	0.540968	17.0968	11.8697
ENSMUSG00000022313	Utp23	UTP23 small subunit processome component [Source:MGI Symbol;Acc:MGI:1925831]	15	2.01543	0.0559286	0.540968	0.883764	1.77325
ENSMUSG00000075297	H60b	histocompatibility 60b [Source:MGI Symbol;Acc:MGI:3649078]	10	2.61343	0.0559309	0.540968	0.647418	1.73565
ENSMUSG00000107412	Gm20383	predicted gene, 20383 [Source:MGI Symbol;Acc:MGI:5012568]	6	3.36793	0.0559384	0.540968	0.391654	1.36145
ENSMUSG00000036181	H1f2	H1.2 linker histone, cluster member [Source:MGI Symbol;Acc:MGI:1931526]	13	-1.41493	0.0559395	0.540968	173.39	122.552
ENSMUSG00000027500	Stmn2	stathmin-like 2 [Source:MGI Symbol;Acc:MGI:98241]	3	-2.94752	0.0560732	0.541925	1.46053	0.48907
ENSMUSG00000022136	Dnajc3	DnaJ heat shock protein family (Hsp40) member C3 [Source:MGI Symbol;Acc:MGI:107373]	14	1.43945	0.0561139	0.541983	17.6734	25.4404
ENSMUSG00000106665	Gm43389	predicted gene 43389 [Source:MGI Symbol;Acc:MGI:5663526]	5	-2.86149	0.0561809	0.542097	0.801896	0.277517
ENSMUSG00000097729	2310015A10Rik	RIKEN cDNA 2310015A10 gene [Source:MGI Symbol;Acc:MGI:1916798]	12	-1.6751	0.0562045	0.542097	3.9848	2.37965
ENSMUSG00000070730	Rmdn3	regulator of microtubule dynamics 3 [Source:MGI Symbol;Acc:MGI:1915059]	2	-1.50799	0.0562325	0.542097	14.9533	9.90282
ENSMUSG00000014778	Fhod1	formin homology 2 domain containing 1 [Source:MGI Symbol;Acc:MGI:2679008]	8	1.56291	0.0562645	0.542097	4.17016	6.53229
ENSMUSG00000026211	Obsl1	obscurin-like 1 [Source:MGI Symbol;Acc:MGI:2138628]	1	1.54293	0.0563307	0.5424	1.18557	1.83433
ENSMUSG00000044768	Macir	macrophage immunometabolism regulator [Source:MGI Symbol;Acc:MGI:1277184]	1	-1.83276	0.0564297	0.543018	1.9582	1.06743
ENSMUSG00000041670	Rims1	regulating synaptic membrane exocytosis 1 [Source:MGI Symbol;Acc:MGI:2152971]	1	-2.35562	0.0565669	0.543799	3.89123	1.6465
ENSMUSG00000022565	Plec	plectin [Source:MGI Symbol;Acc:MGI:1277961]	15	1.58294	0.0565917	0.543799	155.267	245.777
ENSMUSG00000020142	Slc1a4	solute carrier family 1 (glutamate/neutral amino acid transporter), member 4 [Source:MGI Symbol;Acc:MGI:2135601]	11	1.75243	0.0566486	0.543799	6.26715	10.9904
ENSMUSG00000089742	Gm15898	predicted gene 15898 [Source:MGI Symbol;Acc:MGI:3802167]	8	-2.50209	0.0566763	0.543799	2.3369	0.91192
ENSMUSG00000046442	Ppm1e	protein phosphatase 1E (PP2C domain containing) [Source:MGI Symbol;Acc:MGI:2444096]	11	-2.20206	0.0566983	0.543799	6.48945	2.94034
ENSMUSG00000032531	Amotl2	angiomotin-like 2 [Source:MGI Symbol;Acc:MGI:1929286]	9	1.75001	0.0567198	0.543799	28.1475	49.2656
ENSMUSG00000102498	Gm19445	predicted gene, 19445 [Source:MGI Symbol;Acc:MGI:5011630]	3	-1.91893	0.0567886	0.544125	7.43051	3.85493
ENSMUSG00000030223	Ptpro	protein tyrosine phosphatase, receptor type, O [Source:MGI Symbol;Acc:MGI:1097152]	6	-2.38561	0.0569796	0.544867	1.25518	0.51968
ENSMUSG00000036620	Mgat4b	mannoside acetylglucosaminyltransferase 4, isoenzyme B [Source:MGI Symbol;Acc:MGI:2143974]	11	1.55892	0.0569838	0.544867	7.90591	12.3258
ENSMUSG00000025584	Pde8a	phosphodiesterase 8A [Source:MGI Symbol;Acc:MGI:1277116]	7	-2.00176	0.0570561	0.544867	11.1123	5.54212
ENSMUSG00000017167	Cntnap1	contactin associated protein-like 1 [Source:MGI Symbol;Acc:MGI:1858201]	11	-1.73807	0.0571055	0.544867	3.66974	2.10675
ENSMUSG00000054976	Nyap2	neuronal tyrosine-phophorylated phosphoinositide 3-kinase adaptor 2 [Source:MGI Symbol;Acc:MGI:2443135]	1	-2.78461	0.05721	0.544867	1.90004	0.678851
ENSMUSG00000045314	Sowahb	sosondowah ankyrin repeat domain family member B [Source:MGI Symbol;Acc:MGI:1925338]	5	-3.14109	0.0572169	0.544867	0.657184	0.201029
ENSMUSG00000025366	Esyt1	extended synaptotagmin-like protein 1 [Source:MGI Symbol;Acc:MGI:1344426]	10	1.45286	0.0572211	0.544867	7.1312	10.3684
ENSMUSG00000025278	Flnb	filamin, beta [Source:MGI Symbol;Acc:MGI:2446089]	14	1.48844	0.0572438	0.544867	38.6482	57.5213
ENSMUSG00000028517	Plpp3	phospholipid phosphatase 3 [Source:MGI Symbol;Acc:MGI:1915166]	4	1.82472	0.057245	0.544867	9.54053	17.4029
ENSMUSG00000084493	Gm22106	predicted gene, 22106 [Source:MGI Symbol;Acc:MGI:5451883]	15	-2.01326	0.057311	0.544867	22.6335	11.1251
ENSMUSG00000046157	Tmem229b	transmembrane protein 229B [Source:MGI Symbol;Acc:MGI:2444389]	12	-1.7535	0.0573137	0.544867	5.21495	2.9646
ENSMUSG00000030519	Apba2	amyloid beta (A4) precursor protein-binding, family A, member 2 [Source:MGI Symbol;Acc:MGI:1261791]	7	-2.57252	0.057322	0.544867	5.07524	1.96416
ENSMUSG00000032374	Plod2	procollagen lysine, 2-oxoglutarate 5-dioxygenase 2 [Source:MGI Symbol;Acc:MGI:1347007]	9	1.488	0.0573277	0.544867	15.2323	22.6611
ENSMUSG00000063428	Ddo	D-aspartate oxidase [Source:MGI Symbol;Acc:MGI:1925528]	10	2.12823	0.0573544	0.544867	0.535193	1.14363
ENSMUSG00000029613	Eif2ak1	eukaryotic translation initiation factor 2 alpha kinase 1 [Source:MGI Symbol;Acc:MGI:1353448]	5	1.44168	0.0574611	0.545127	4.03869	5.82124
ENSMUSG00000040258	Nxph4	neurexophilin 4 [Source:MGI Symbol;Acc:MGI:1336197]	10	1.73612	0.0574621	0.545127	19.5221	33.9048
ENSMUSG00000024395	Lims2	LIM and senescent cell antigen like domains 2 [Source:MGI Symbol;Acc:MGI:2385067]	18	2.09503	0.0575074	0.545127	0.342762	0.723146
ENSMUSG00000035900	Gramd4	GRAM domain containing 4 [Source:MGI Symbol;Acc:MGI:2676308]	15	1.55188	0.0575214	0.545127	5.27289	8.19288
ENSMUSG00000020805	Slc13a5	solute carrier family 13 (sodium-dependent citrate transporter), member 5 [Source:MGI Symbol;Acc:MGI:3037150]	11	-2.80005	0.0575622	0.545183	0.942974	0.329097
ENSMUSG00000031706	Rfx1	regulatory factor X, 1 (influences HLA class II expression) [Source:MGI Symbol;Acc:MGI:105982]	8	-1.46765	0.0576745	0.545915	6.18379	4.2171
ENSMUSG00000104548	Gm43857	predicted gene 43857 [Source:MGI Symbol;Acc:MGI:5663994]	3	-2.32525	0.0577704	0.546492	0.833862	0.349103
ENSMUSG00000100039	Gm28959	predicted gene 28959 [Source:MGI Symbol;Acc:MGI:5579665]	9	-2.44419	0.0578799	0.54662	13.2569	5.38358
ENSMUSG00000035493	Tgfbi	transforming growth factor, beta induced [Source:MGI Symbol;Acc:MGI:99959]	13	2.44174	0.057882	0.54662	9.38743	22.9167
ENSMUSG00000040855	Reps2	RALBP1 associated Eps domain containing protein 2 [Source:MGI Symbol;Acc:MGI:2663511]	X	-1.91744	0.0579184	0.54662	1.80016	0.934188
ENSMUSG00000041578	Crx	cone-rod homeobox [Source:MGI Symbol;Acc:MGI:1194883]	7	-1.77411	0.0579513	0.54662	102.961	58.02
ENSMUSG00000110972	5830462O15Rik	RIKEN cDNA 5830462O15 gene [Source:MGI Symbol;Acc:MGI:1923360]	9	-2.96259	0.057959	0.54662	1.5898	0.522382
ENSMUSG00000039706	Ldb2	LIM domain binding 2 [Source:MGI Symbol;Acc:MGI:894670]	5	-1.6506	0.058089	0.54688	2.68616	1.63318
ENSMUSG00000019872	Smpdl3a	sphingomyelin phosphodiesterase, acid-like 3A [Source:MGI Symbol;Acc:MGI:1931437]	10	1.97393	0.0580903	0.54688	1.40103	2.77911
ENSMUSG00000023572	Ccndbp1	cyclin D-type binding-protein 1 [Source:MGI Symbol;Acc:MGI:109595]	2	-1.44786	0.0580915	0.54688	9.95403	6.8726
ENSMUSG00000053617	Sh3pxd2a	SH3 and PX domains 2A [Source:MGI Symbol;Acc:MGI:1298393]	19	1.56282	0.0581521	0.547121	2.95517	4.62069
ENSMUSG00000032265	Tent5a	terminal nucleotidyltransferase 5A [Source:MGI Symbol;Acc:MGI:2670964]	9	2.25828	0.0582464	0.547597	5.40175	12.1925
ENSMUSG00000006235	Epor	erythropoietin receptor [Source:MGI Symbol;Acc:MGI:95408]	9	2.57097	0.0582892	0.547597	0.405941	1.05896
ENSMUSG00000100967	Gm29666	predicted gene 29666 [Source:MGI Symbol;Acc:MGI:5580372]	15	-2.73822	0.058308	0.547597	0.371885	0.132667
ENSMUSG00000112307	Gm48751	predicted gene, 48751 [Source:MGI Symbol;Acc:MGI:6098427]	10	2.07135	0.0584805	0.548082	1.43506	2.98306
ENSMUSG00000014867	Surf4	surfeit gene 4 [Source:MGI Symbol;Acc:MGI:98445]	2	1.44396	0.0584847	0.548082	25.7491	37.1789
ENSMUSG00000041020	Map7d2	MAP7 domain containing 2 [Source:MGI Symbol;Acc:MGI:1917474]	X	-2.18482	0.0584871	0.548082	4.22612	1.92484
ENSMUSG00000037196	Pacrg	PARK2 co-regulated [Source:MGI Symbol;Acc:MGI:1916560]	17	-1.99006	0.0585089	0.548082	3.65743	1.81478
ENSMUSG00000097929	Tunar	Tcl1 upstream neural differentiation associated RNA [Source:MGI Symbol;Acc:MGI:1917202]	12	-3.57673	0.0585757	0.548082	0.722148	0.198801
ENSMUSG00000042644	Itpr3	inositol 1,4,5-triphosphate receptor 3 [Source:MGI Symbol;Acc:MGI:96624]	17	1.51278	0.058626	0.548082	9.58154	14.4951
ENSMUSG00000024873	Cnih2	cornichon family AMPA receptor auxiliary protein 2 [Source:MGI Symbol;Acc:MGI:1277225]	19	-2.48243	0.0586372	0.548082	3.58853	1.41502
ENSMUSG00000027351	Spred1	sprouty protein with EVH-1 domain 1, related sequence [Source:MGI Symbol;Acc:MGI:2150016]	2	-1.50039	0.0586403	0.548082	19.7017	13.1226
ENSMUSG00000037110	Ralgapa2	Ral GTPase activating protein, alpha subunit 2 (catalytic) [Source:MGI Symbol;Acc:MGI:3036245]	2	-1.54676	0.0588455	0.549671	3.0084	1.94231
ENSMUSG00000030315	Vgll4	vestigial like family member 4 [Source:MGI Symbol;Acc:MGI:2652840]	6	1.52602	0.058987	0.550016	6.35942	9.70626
ENSMUSG00000030101	Sumf1	sulfatase modifying factor 1 [Source:MGI Symbol;Acc:MGI:1889844]	6	1.50325	0.0590143	0.550016	7.36207	11.0722
ENSMUSG00000060510	Zfp266	zinc finger protein 266 [Source:MGI Symbol;Acc:MGI:1924769]	9	1.41088	0.0590683	0.550016	4.64005	6.55022
ENSMUSG00000086662	BC046251	cDNA sequence BC046251 [Source:MGI Symbol;Acc:MGI:3039598]	7	-3.03689	0.0590781	0.550016	0.750572	0.241395
ENSMUSG00000100826	Snhg14	small nucleolar RNA host gene 14 [Source:MGI Symbol;Acc:MGI:1289201]	7	-1.89057	0.0590823	0.550016	1.51999	0.802403
ENSMUSG00000108720	Gm44672	predicted gene 44672 [Source:MGI Symbol;Acc:MGI:5753248]	7	-2.8366	0.0591655	0.550016	1.00644	0.356522
ENSMUSG00000020592	Sdc1	syndecan 1 [Source:MGI Symbol;Acc:MGI:1349162]	12	1.7672	0.0592791	0.550016	8.26923	14.6162
ENSMUSG00000022178	Ajuba	ajuba LIM protein [Source:MGI Symbol;Acc:MGI:1341886]	14	1.715	0.0592847	0.550016	4.99957	8.5821
ENSMUSG00000109498	Gm45222	predicted gene 45222 [Source:MGI Symbol;Acc:MGI:5753798]	7	1.63044	0.0593089	0.550016	1.59214	2.59783
ENSMUSG00000034903	Cobll1	Cobl-like 1 [Source:MGI Symbol;Acc:MGI:2442894]	2	1.82631	0.0593128	0.550016	1.06982	1.95563
ENSMUSG00000034460	Six4	sine oculis-related homeobox 4 [Source:MGI Symbol;Acc:MGI:106034]	12	2.21336	0.0593692	0.550016	0.147726	0.330006
ENSMUSG00000020657	Dnajc27	DnaJ heat shock protein family (Hsp40) member C27 [Source:MGI Symbol;Acc:MGI:2443036]	12	-1.43602	0.0594043	0.550016	7.49095	5.21845
ENSMUSG00000038668	Lpar1	lysophosphatidic acid receptor 1 [Source:MGI Symbol;Acc:MGI:108429]	4	2.6841	0.0594171	0.550016	0.189317	0.507261
ENSMUSG00000024914	Drap1	Dr1 associated protein 1 (negative cofactor 2 alpha) [Source:MGI Symbol;Acc:MGI:1913806]	19	1.42885	0.0594196	0.550016	18.9863	27.1254
ENSMUSG00000045319	Proser2	proline and serine rich 2 [Source:MGI Symbol;Acc:MGI:2442238]	2	1.50288	0.0594497	0.550016	3.17756	4.7772
ENSMUSG00000034023	Fancd2	Fanconi anemia, complementation group D2 [Source:MGI Symbol;Acc:MGI:2448480]	6	2.33825	0.0595317	0.550016	0.187515	0.443679
ENSMUSG00000031879	Ciao2b	cytosolic iron-sulfur assembly component 2B [Source:MGI Symbol;Acc:MGI:1915773]	8	1.83072	0.0595455	0.550016	3.37238	6.19414
ENSMUSG00000035776	Cd99l2	CD99 antigen-like 2 [Source:MGI Symbol;Acc:MGI:2177151]	X	1.44485	0.0595805	0.550016	10.4748	15.1405
ENSMUSG00000070644	Etnk2	ethanolamine kinase 2 [Source:MGI Symbol;Acc:MGI:2443760]	1	-2.56822	0.0595938	0.550016	0.511013	0.194058
ENSMUSG00000018900	Slc22a5	solute carrier family 22 (organic cation transporter), member 5 [Source:MGI Symbol;Acc:MGI:1329012]	11	1.48395	0.0596148	0.550016	7.93722	11.7787
ENSMUSG00000009394	Syn2	synapsin II [Source:MGI Symbol;Acc:MGI:103020]	6	-1.5622	0.0596931	0.550016	1.48913	0.952513
ENSMUSG00000032401	Lctl	lactase-like [Source:MGI Symbol;Acc:MGI:2183549]	9	1.69739	0.0597092	0.550016	12.2827	20.8473
ENSMUSG00000030399	Ckm	creatine kinase, muscle [Source:MGI Symbol;Acc:MGI:88413]	7	-2.87948	0.059742	0.550016	0.669016	0.223651
ENSMUSG00000029126	Nsg1	neuron specific gene family member 1 [Source:MGI Symbol;Acc:MGI:109149]	5	-1.94273	0.0597888	0.550016	2.20859	1.12723
ENSMUSG00000023039	Krt7	keratin 7 [Source:MGI Symbol;Acc:MGI:96704]	15	4.02966	0.059794	0.550016	0.20051	0.814338
ENSMUSG00000027895	Kcnc4	potassium voltage gated channel, Shaw-related subfamily, member 4 [Source:MGI Symbol;Acc:MGI:96670]	3	-2.07253	0.0598022	0.550016	1.33803	0.639668
ENSMUSG00000023473	Celsr3	cadherin, EGF LAG seven-pass G-type receptor 3 [Source:MGI Symbol;Acc:MGI:1858236]	9	-2.00994	0.0598447	0.550016	5.91564	2.93949
ENSMUSG00000064339	mt-Rnr2	mitochondrially encoded 16S rRNA [Source:MGI Symbol;Acc:MGI:102492]	MT	1.58161	0.0599296	0.550016	32415.7	51269.1
ENSMUSG00000025816	Sec61a2	Sec61, alpha subunit 2 (S. cerevisiae) [Source:MGI Symbol;Acc:MGI:1931071]	2	-1.54569	0.0599632	0.550016	4.03876	2.60221
ENSMUSG00000034487	Poglut3	protein O-glucosyltransferase 3 [Source:MGI Symbol;Acc:MGI:1923765]	9	2.04402	0.0599639	0.550016	1.56854	3.21274
ENSMUSG00000038628	Polr3k	polymerase (RNA) III (DNA directed) polypeptide K [Source:MGI Symbol;Acc:MGI:1914255]	2	-1.62839	0.0599904	0.550016	7.74104	4.73616
ENSMUSG00000087700	Gm15283	predicted gene 15283 [Source:MGI Symbol;Acc:MGI:3705161]	12	-3.85193	0.0600094	0.550016	0.748241	0.180499
ENSMUSG00000056459	Zbtb25	zinc finger and BTB domain containing 25 [Source:MGI Symbol;Acc:MGI:99197]	12	-1.64023	0.060124	0.550708	5.14918	3.13007
ENSMUSG00000054537	Tmprss11e	transmembrane protease, serine 11e [Source:MGI Symbol;Acc:MGI:3513175]	5	2.70596	0.0602421	0.550708	0.505476	1.36806
ENSMUSG00000034212	Ankmy1	ankyrin repeat and MYND domain containing 1 [Source:MGI Symbol;Acc:MGI:3045261]	1	-2.31123	0.0603324	0.550708	0.428669	0.17886
ENSMUSG00000022010	Tsc22d1	TSC22 domain family, member 1 [Source:MGI Symbol;Acc:MGI:109127]	14	1.48725	0.060381	0.550708	49.2547	73.2574
ENSMUSG00000100017	2410022M11Rik	RIKEN cDNA 2410022M11 gene [Source:MGI Symbol;Acc:MGI:1917005]	14	-2.67476	0.0604724	0.550708	1.23314	0.450944
ENSMUSG00000030409	Dmpk	dystrophia myotonica-protein kinase [Source:MGI Symbol;Acc:MGI:94906]	7	1.45864	0.06048	0.550708	11.469	16.7275
ENSMUSG00000037601	Nme1	NME/NM23 nucleoside diphosphate kinase 1 [Source:MGI Symbol;Acc:MGI:97355]	11	-1.87443	0.0605039	0.550708	2.25095	1.1889
ENSMUSG00000032062	2310030G06Rik	RIKEN cDNA 2310030G06 gene [Source:MGI Symbol;Acc:MGI:1914202]	9	1.91693	0.0605094	0.550708	5.34015	10.2423
ENSMUSG00000022325	Pop1	processing of precursor 1, ribonuclease P/MRP family, (S. cerevisiae) [Source:MGI Symbol;Acc:MGI:1914974]	15	2.1366	0.0605346	0.550708	0.80933	1.72022
ENSMUSG00000103255	Pcdhac1	protocadherin alpha subfamily C, 1 [Source:MGI Symbol;Acc:MGI:1891442]	18	-3.48883	0.0605417	0.550708	0.361754	0.0988992
ENSMUSG00000026721	Rabgap1l	RAB GTPase activating protein 1-like [Source:MGI Symbol;Acc:MGI:1352507]	1	-1.39039	0.0605694	0.550708	2.74151	1.97098
ENSMUSG00000021108	Prkch	protein kinase C, eta [Source:MGI Symbol;Acc:MGI:97600]	12	-1.76946	0.0605865	0.550708	1.49321	0.843741
ENSMUSG00000028784	Spocd1	SPOC domain containing 1 [Source:MGI Symbol;Acc:MGI:3652045]	4	2.24329	0.0606063	0.550708	1.95759	4.40093
ENSMUSG00000098682	Otx2os1	orthodenticle homeobox 2 opposite strand 1 [Source:MGI Symbol;Acc:MGI:3583292]	14	-1.93032	0.0606418	0.550708	5.67506	2.92328
ENSMUSG00000049285	Mblac1	metallo-beta-lactamase domain containing 1 [Source:MGI Symbol;Acc:MGI:2679717]	5	2.42557	0.0606431	0.550708	0.741701	1.81439
ENSMUSG00000047562	Mmp10	matrix metallopeptidase 10 [Source:MGI Symbol;Acc:MGI:97007]	9	5.35977	0.0606936	0.550708	1.26981	6.81216
ENSMUSG00000031824	6430548M08Rik	RIKEN cDNA 6430548M08 gene [Source:MGI Symbol;Acc:MGI:2443793]	8	-1.59146	0.0606985	0.550708	24.1383	15.1599
ENSMUSG00000036192	Rorb	RAR-related orphan receptor beta [Source:MGI Symbol;Acc:MGI:1343464]	19	-1.88015	0.0607366	0.550708	12.8101	6.80927
ENSMUSG00000061130	Ppm1b	protein phosphatase 1B, magnesium dependent, beta isoform [Source:MGI Symbol;Acc:MGI:101841]	17	-1.41584	0.0607681	0.550708	23.2642	16.4257
ENSMUSG00000014075	Dynlt2b	dynein light chain Tctex-type 2B [Source:MGI Symbol;Acc:MGI:1913311]	16	-2.08081	0.0607902	0.550708	2.48577	1.1805
ENSMUSG00000028644	Ermap	erythroblast membrane-associated protein [Source:MGI Symbol;Acc:MGI:1349816]	4	-2.68048	0.0608884	0.551278	0.369038	0.139444
ENSMUSG00000018995	Nars2	asparaginyl-tRNA synthetase 2 (mitochondrial)(putative) [Source:MGI Symbol;Acc:MGI:2142075]	7	1.80435	0.0610342	0.551574	0.588568	1.07001
ENSMUSG00000041577	Prelp	proline arginine-rich end leucine-rich repeat [Source:MGI Symbol;Acc:MGI:2151110]	1	1.50791	0.0610595	0.551574	14.0276	21.1682
ENSMUSG00000038235	F11r	F11 receptor [Source:MGI Symbol;Acc:MGI:1321398]	1	1.5778	0.0610836	0.551574	5.68158	8.98155
ENSMUSG00000064372	mt-Tp	mitochondrially encoded tRNA proline [Source:MGI Symbol;Acc:MGI:102478]	MT	1.8226	0.0611567	0.551574	66.9436	122.317
ENSMUSG00000019579	Mydgf	myeloid derived growth factor [Source:MGI Symbol;Acc:MGI:2156020]	17	1.54625	0.061191	0.551574	6.57148	10.1606
ENSMUSG00000025190	Got1	glutamic-oxaloacetic transaminase 1, soluble [Source:MGI Symbol;Acc:MGI:95791]	19	-1.68524	0.0612439	0.551574	21.4764	12.7228
ENSMUSG00000070780	Rbm47	RNA binding motif protein 47 [Source:MGI Symbol;Acc:MGI:2384294]	5	2.26287	0.0612486	0.551574	0.626176	1.4158
ENSMUSG00000042333	Tnfrsf14	tumor necrosis factor receptor superfamily, member 14 (herpesvirus entry mediator) [Source:MGI Symbol;Acc:MGI:2675303]	4	2.1954	0.061272	0.551574	1.01431	2.22929
ENSMUSG00000113140	Gm48624	predicted gene, 48624 [Source:MGI Symbol;Acc:MGI:6098222]	13	-2.47651	0.0612727	0.551574	1.28342	0.506839
ENSMUSG00000022237	Ankrd33b	ankyrin repeat domain 33B [Source:MGI Symbol;Acc:MGI:1917904]	15	-1.78894	0.0612905	0.551574	29.9583	16.7414
ENSMUSG00000048120	Entpd1	ectonucleoside triphosphate diphosphohydrolase 1 [Source:MGI Symbol;Acc:MGI:102805]	19	1.8932	0.0613357	0.551574	0.782969	1.47446
ENSMUSG00000003657	Calb2	calbindin 2 [Source:MGI Symbol;Acc:MGI:101914]	8	-2.68789	0.0613448	0.551574	21.3855	7.93131
ENSMUSG00000109844	Gm31816	predicted gene, 31816 [Source:MGI Symbol;Acc:MGI:5590975]	9	1.92101	0.0614363	0.552078	1.36649	2.63328
ENSMUSG00000096351	Samd11	sterile alpha motif domain containing 11 [Source:MGI Symbol;Acc:MGI:2446220]	4	-1.80407	0.0614863	0.55221	48.8808	27.0806
ENSMUSG00000025789	St8sia2	ST8 alpha-N-acetyl-neuraminide alpha-2,8-sialyltransferase 2 [Source:MGI Symbol;Acc:MGI:106020]	7	1.77659	0.0615248	0.552238	3.57311	6.35861
ENSMUSG00000075318	Scn2a	sodium channel, voltage-gated, type II, alpha [Source:MGI Symbol;Acc:MGI:98248]	2	-1.87845	0.0616351	0.552804	1.46882	0.778478
ENSMUSG00000071658	Gng3	guanine nucleotide binding protein (G protein), gamma 3 [Source:MGI Symbol;Acc:MGI:102704]	19	-3.40099	0.0616586	0.552804	6.33355	1.83952
ENSMUSG00000009376	Met	met proto-oncogene [Source:MGI Symbol;Acc:MGI:96969]	6	2.06181	0.0617363	0.553183	1.13738	2.34138
ENSMUSG00000060519	Tor3a	torsin family 3, member A [Source:MGI Symbol;Acc:MGI:1353652]	1	1.62876	0.061875	0.554064	4.93321	8.03236
ENSMUSG00000038481	Cdk19	cyclin-dependent kinase 19 [Source:MGI Symbol;Acc:MGI:1925584]	10	-1.50464	0.0619199	0.554064	10.9788	7.28932
ENSMUSG00000110622	Iqcn	IQ motif containing N [Source:MGI Symbol;Acc:MGI:3708784]	8	4.19868	0.0619411	0.554064	10.9927	46.1669
ENSMUSG00000042797	Aqp11	aquaporin 11 [Source:MGI Symbol;Acc:MGI:1913583]	7	-2.08068	0.0619846	0.554136	0.280846	0.13588
ENSMUSG00000090035	Galnt4	polypeptide N-acetylgalactosaminyltransferase 4 [Source:MGI Symbol;Acc:MGI:894692]	10	-1.5023	0.0620424	0.554335	4.12093	2.74186
ENSMUSG00000074513	Arfip1	ADP-ribosylation factor interacting protein 1 [Source:MGI Symbol;Acc:MGI:1277120]	3	2.02152	0.0621411	0.554611	0.92876	1.89137
ENSMUSG00000040675	Mthfd1l	methylenetetrahydrofolate dehydrogenase (NADP+ dependent) 1-like [Source:MGI Symbol;Acc:MGI:1924836]	10	1.42727	0.0621738	0.554611	9.56833	13.658
ENSMUSG00000020706	Ftsj3	FtsJ RNA methyltransferase homolog 3 (E. coli) [Source:MGI Symbol;Acc:MGI:1860295]	11	1.40597	0.0622741	0.554611	8.35271	11.7465
ENSMUSG00000027878	Notch2	notch 2 [Source:MGI Symbol;Acc:MGI:97364]	3	1.49528	0.0622823	0.554611	25.0273	37.426
ENSMUSG00000112039	Gm5136	predicted gene 5136 [Source:MGI Symbol;Acc:MGI:3647286]	10	-3.39201	0.0622831	0.554611	1.57118	0.444918
ENSMUSG00000072214	Septin5	septin 5 [Source:MGI Symbol;Acc:MGI:1195461]	16	-1.90442	0.0623579	0.554611	0.929686	0.490583
ENSMUSG00000054135	A430110L20Rik	RIKEN cDNA A430110L20 gene [Source:MGI Symbol;Acc:MGI:3036249]	1	-2.58409	0.0623596	0.554611	0.6118	0.226908
ENSMUSG00000067220	Cnga1	cyclic nucleotide gated channel alpha 1 [Source:MGI Symbol;Acc:MGI:88436]	5	-1.78029	0.0623649	0.554611	38.5662	21.6557
ENSMUSG00000054034	Tceal5	transcription elongation factor A (SII)-like 5 [Source:MGI Symbol;Acc:MGI:3036236]	X	-2.07826	0.0624065	0.554611	4.77269	2.28298
ENSMUSG00000018800	Abca5	ATP-binding cassette, sub-family A (ABC1), member 5 [Source:MGI Symbol;Acc:MGI:2386607]	11	1.4816	0.0624284	0.554611	9.82436	14.5564
ENSMUSG00000090582	Gm17024	predicted gene 17024 [Source:MGI Symbol;Acc:MGI:4937851]	12	1.76225	0.0625407	0.555029	29.9164	52.7934
ENSMUSG00000047658	Gal3st3	galactose-3-O-sulfotransferase 3 [Source:MGI Symbol;Acc:MGI:3617843]	19	-1.95354	0.0625608	0.555029	4.15218	2.10691
ENSMUSG00000024293	Esco1	establishment of sister chromatid cohesion N-acetyltransferase 1 [Source:MGI Symbol;Acc:MGI:1925055]	18	-1.55018	0.0625821	0.555029	7.52904	4.85079
ENSMUSG00000034855	Cxcl10	chemokine (C-X-C motif) ligand 10 [Source:MGI Symbol;Acc:MGI:1352450]	5	3.13908	0.0626746	0.555535	6.16866	19.3814
ENSMUSG00000086782	E130102H24Rik	RIKEN cDNA E130102H24 gene [Source:MGI Symbol;Acc:MGI:1925116]	4	-1.76104	0.0627147	0.555574	5.67325	3.23392
ENSMUSG00000063145	Bbs5	Bardet-Biedl syndrome 5 (human) [Source:MGI Symbol;Acc:MGI:1919819]	2	-1.95808	0.0627816	0.555839	9.40921	4.78424
ENSMUSG00000019820	Utrn	utrophin [Source:MGI Symbol;Acc:MGI:104631]	10	1.406	0.0628157	0.555839	22.4746	31.5996
ENSMUSG00000076433	Cep295nl	CEP295 N-terminal like [Source:MGI Symbol;Acc:MGI:1929713]	11	1.89336	0.0628962	0.556105	2.09572	3.98502
ENSMUSG00000031227	Magee1	MAGE family member E1 [Source:MGI Symbol;Acc:MGI:2148149]	X	-1.45789	0.062917	0.556105	8.77922	6.02532
ENSMUSG00000082377	Gm14415	predicted gene 14415 [Source:MGI Symbol;Acc:MGI:3652252]	2	-5.092	0.0630883	0.557304	0.938688	0.187954
ENSMUSG00000027748	Trpc4	transient receptor potential cation channel, subfamily C, member 4 [Source:MGI Symbol;Acc:MGI:109525]	3	-3.22479	0.0632424	0.558315	0.320418	0.0957472
ENSMUSG00000019302	Atp6v0a1	ATPase, H+ transporting, lysosomal V0 subunit A1 [Source:MGI Symbol;Acc:MGI:103286]	11	-1.46088	0.0632742	0.558315	25.0584	17.147
ENSMUSG00000020890	Gucy2e	guanylate cyclase 2e [Source:MGI Symbol;Acc:MGI:105123]	11	-1.74992	0.06334	0.558579	24.0526	13.7403
ENSMUSG00000071226	Cecr2	CECR2, histone acetyl-lysine reader [Source:MGI Symbol;Acc:MGI:1923799]	6	-1.4575	0.0635391	0.559647	3.99262	2.73843
ENSMUSG00000034796	Cpne7	copine VII [Source:MGI Symbol;Acc:MGI:2142747]	8	-2.15344	0.0635758	0.559647	1.25228	0.577552
ENSMUSG00000073016	Uprt	uracil phosphoribosyltransferase [Source:MGI Symbol;Acc:MGI:2685620]	X	1.7102	0.0635819	0.559647	2.64583	4.53115
ENSMUSG00000063810	Alms1	ALMS1, centrosome and basal body associated [Source:MGI Symbol;Acc:MGI:1934606]	6	-1.45434	0.0636189	0.559647	4.09849	2.81669
ENSMUSG00000038122	Tbc1d32	TBC1 domain family, member 32 [Source:MGI Symbol;Acc:MGI:2442827]	10	-1.43242	0.0636403	0.559647	3.78836	2.64253
ENSMUSG00000032297	Celf6	CUGBP, Elav-like family member 6 [Source:MGI Symbol;Acc:MGI:1923433]	9	-2.35828	0.0636781	0.559665	1.29749	0.546948
ENSMUSG00000022126	Acod1	aconitate decarboxylase 1 [Source:MGI Symbol;Acc:MGI:103206]	14	2.44488	0.0638775	0.560782	0.325261	0.804006
ENSMUSG00000079339	Ifit1bl1	interferon induced protein with tetratricpeptide repeats 1B like 1 [Source:MGI Symbol;Acc:MGI:3650685]	19	4.61181	0.0638969	0.560782	1.28734	5.94771
ENSMUSG00000020315	Sptbn1	spectrin beta, non-erythrocytic 1 [Source:MGI Symbol;Acc:MGI:98388]	11	1.43924	0.0639141	0.560782	82.5316	118.784
ENSMUSG00000004561	Mettl17	methyltransferase like 17 [Source:MGI Symbol;Acc:MGI:1098577]	14	-1.7666	0.0639674	0.560782	2.03157	1.14202
ENSMUSG00000007908	Hmgcll1	3-hydroxymethyl-3-methylglutaryl-Coenzyme A lyase-like 1 [Source:MGI Symbol;Acc:MGI:2446108]	9	-2.55367	0.0639858	0.560782	0.734705	0.28864
ENSMUSG00000022971	Ifnar2	interferon (alpha and beta) receptor 2 [Source:MGI Symbol;Acc:MGI:1098243]	16	1.6705	0.0640207	0.560782	1.85447	3.09254
ENSMUSG00000034336	Ina	internexin neuronal intermediate filament protein, alpha [Source:MGI Symbol;Acc:MGI:96568]	19	-2.88819	0.0640945	0.561114	6.62185	2.28068
ENSMUSG00000015222	Map2	microtubule-associated protein 2 [Source:MGI Symbol;Acc:MGI:97175]	1	-1.41564	0.0641615	0.561385	21.3341	15.0684
ENSMUSG00000031297	Slc7a3	solute carrier family 7 (cationic amino acid transporter, y+ system), member 3 [Source:MGI Symbol;Acc:MGI:1100521]	X	2.31805	0.0641974	0.561385	0.233118	0.548839
ENSMUSG00000097974	Gm10605	predicted gene 10605 [Source:MGI Symbol;Acc:MGI:3642596]	7	-2.75493	0.064418	0.562676	0.89751	0.320161
ENSMUSG00000003469	Phyhip	phytanoyl-CoA hydroxylase interacting protein [Source:MGI Symbol;Acc:MGI:1860417]	14	-2.09095	0.0644187	0.562676	2.47158	1.17313
ENSMUSG00000031137	Fgf13	fibroblast growth factor 13 [Source:MGI Symbol;Acc:MGI:109178]	X	-1.69808	0.0644531	0.562676	3.03991	1.77967
ENSMUSG00000028453	Fancg	Fanconi anemia, complementation group G [Source:MGI Symbol;Acc:MGI:1926471]	4	-1.78815	0.0646092	0.563725	1.34458	0.7573
ENSMUSG00000042210	Abhd14a	abhydrolase domain containing 14A [Source:MGI Symbol;Acc:MGI:1915894]	9	-1.74656	0.064742	0.564007	11.7894	6.73011
[truncated: 13,827 more rows]

## Sheet: Statistically Significant
gene_id	SYMBOL	DESCRIPTION	SEQNAME	Fold_Change	PValue	FDR	WT_6H_Avg_FPKM	E1_6H_Avg_FPKM
[truncated: 115 more rows]

## Sheet: Biologically Significant
gene_id	SYMBOL	DESCRIPTION	SEQNAME	Fold_Change	PValue	FDR	WT_6H_Avg_FPKM	E1_6H_Avg_FPKM
[truncated: 73 more rows]
