# Supplementary material for: The Immediate Early Response of Lens Epithelial Cells to Lens Injury
Source: Cells. 2022 Nov 1;11(21):3456. doi: 10.3390/cells11213456 (PMC9654717; doi:10.3390/cells11213456)
Supplement: Supplementary file 1 [file cells-11-03456-s001.zip › Supplemental Table S6.xlsx]

## Sheet: Data Description
	Analysis Overview
	This spreadsheet is part of a study investingating the transcriptomic consequences of the conditional deletion of either Egr1 or FosB on the lens epithelial cell injury response. It sumarizes the results of a pairwise contrast between FosB null mouse lens epithelial cells (FB_0H) and wildtype LEC (WT_0H) profiled at zero hours after mechanical injury. Positive fold changes indicate increased expr…
	Worksheet Specification
	Worksheet	Description
	Data Description	Describes each worksheet, provides analysis overview and define column headers for data sheets
	Raw_Counts	Counts associated with all Ensembl 104 GTF features for all samples included in this contrast
	All Present Genes	All genes measured in this experiment
	Statistically Significant	All gene differentially expressed with an absolute fold change > 2 and an FDR less than 0.05
	Biologically Significant	All genes meeting criteria for biologically significant differential expression
	Biological Significance Criteria used to identify statistically and biologically significant genes Jiang J, Shihan MH, Wang Y, Duncan MK. Invest Ophthalmol Vis Sci. 2018;59(12):4986-4997. Manthey AL, Terrell AM, Lachke SA, Polson SW, Duncan MK. Genom Data. 2014;2:369-374.
	Criterion			Implementation
	Statistical significance			filter( abs(logFC) > 1 and FDR < 0.05)
	"a change in mRNA level greater than 2 FPKM"			abs(average(FPKM-Condition1) - average(FPKM-Condition2) ) > 2
	"expression level in either condition is 2 FPKM or greater"			abs(average(FPKM-Condition1)) > 2 OR abs(average(FPKM-Condition1) > 2
	FosB Null LEC vs Wildtype LEC 0 hours post injury
	criteria	Total	Up	Down
	Statistically Significant	43	27	16
	Biologically Significant	25	15	10
	Column Header Specification: Raw_Counts
	1 (A)	gene_id		the ensembl id of this feature
	2 (B)	SYMBOL		The symbol of the gene associated with this feature
	3 (C)	DESCRIPTION		The long-form, descriptive name of this gene from Ensembl v104
	4 (D)	SEQNAME		The name of the squence (Chromosome or contig) where this gene is located
	5 (E)	eu_length		The exon-union length of this genomic feature
	6 (F)	eu_gc		The fractional GC content of this feature
	7 (F) through 12 (K)	Sample Labels (WT_0H_1 through FB_0H_3)		Count observed for this feature in the indicated sample
	Column Header Specification: All Present Genes, Statistically Significant, Biologically Significant
	Column number (Workbook Letter)	Header		Description
	1 (A)	gene_id		the ensembl id of this feature
	2 (B)	SYMBOL		The symbol of the gene associated with this feature
	3 (C)	DESCRIPTION		The long-form, descriptive name of this gene from Ensembl v104
	4 (D)	SEQNAME		The name of the squence (Chromosome or contig) where this gene is located
	5 (E)	Fold_Change		The fold change of this gene between FB_0H and WT_0H in Lens Epithelium
	6 (F)	p_value		P_Value calculated by edgeR (FB_0H vs WT_0H)
	7 (G)	FDR		Adjusted p value reported by edgeR (FB_0H vs WT_0H)
	8 (H)	WT_0H_Avg_FPKM		Abundance of this gene (Average FPKM) observed in WT_0H
	9 (I)	FB_0H_Avg_FPKM		Abundance of this gene (Average FPKM) observed in FB_0H
	Red points indicate genes with zero counts in one group

## Sheet: Raw_Counts
gene_id	SYMBOL	DESCRIPTION	SEQNAME	eu_length	eu_gc	WT_0H_1	WT_0H_2	WT_0H_3	FB_0H_1	FB_0H_2	FB_0H_3
ENSMUSG00002074905			10	69	0.681159	0	0	0	0	0	0
ENSMUSG00002076002			17	110	0.545455	0	0	0	0	0	0
ENSMUSG00002075266			12	75	0.413333	0	0	0	0	0	0
ENSMUSG00002076008			11	145	0.62069	0	0	0	0	0	0
ENSMUSG00002074908			2	110	0.627273	0	0	0	0	1	0
ENSMUSG00002074899			GL456372.1	121	0.479339	0	0	0	0	0	0
ENSMUSG00002074901			1	141	0.432624	0	0	0	0	0	0
ENSMUSG00002075999			3	100	0.47	0	0	0	0	0	0
ENSMUSG00002074903			14	76	0.486842	0	0	1	0	1	0
ENSMUSG00002074904			2	140	0.6	1	0	0	3	0	0
ENSMUSG00002075282			X	93	0.44086	0	0	2	0	0	1
ENSMUSG00002074910			1	102	0.5	0	0	0	0	0	0
ENSMUSG00002076364			X	71	0.338028	0	0	0	0	0	0
ENSMUSG00002074921			16	96	0.416667	0	0	0	0	0	0
ENSMUSG00002074922			7	460	0.46087	0	0	0	0	0	0
ENSMUSG00000095475			JH584299.1	1446	0.482711	0	0	0	0	0	0
ENSMUSG00002074928			X	205	0.614634	0	0	0	0	0	0
ENSMUSG00002075293			3	110	0.518182	0	0	0	0	0	0
ENSMUSG00002076006			7	76	0.447368	2	0	3	0	1	0
ENSMUSG00002074931			2	131	0.51145	0	0	0	0	0	0
ENSMUSG00002074919			Y	110	0.609091	0	0	0	0	0	0
ENSMUSG00002074920			2	96	0.614583	0	0	0	0	0	0
ENSMUSG00002074917			4	72	0.597222	0	0	0	0	0	0
ENSMUSG00002074935			2	136	0.507353	8	3	5	4	0	1
ENSMUSG00002076029			17	76	0.5	0	0	0	0	0	0
ENSMUSG00002074924			6	102	0.343137	0	0	0	0	0	0
ENSMUSG00002074934			2	93	0.505376	0	0	0	0	0	0
ENSMUSG00002075290			13	150	0.6	0	0	0	0	0	0
ENSMUSG00002074940			19	104	0.413462	0	0	0	0	0	0
ENSMUSG00002074941			11	56	0.875	1	0	0	0	0	1
ENSMUSG00002074942			5	142	0.65493	0	0	0	0	0	0
ENSMUSG00002074943			2	124	0.435484	2	3	0	0	2	0
ENSMUSG00002076037			7	79	0.43038	0	0	0	0	0	0
ENSMUSG00002076038			18	119	0.546218	0	0	0	0	0	0
ENSMUSG00002074946			15	74	0.540541	0	0	0	0	0	0
ENSMUSG00002074947			7	120	0.55	0	0	0	0	0	0
ENSMUSG00002074948			14	110	0.627273	0	0	0	0	0	0
ENSMUSG00002075313			16	110	0.618182	0	0	0	0	0	0
ENSMUSG00002076043			1	442	0.255656	0	0	0	0	0	0
ENSMUSG00000047383		novel transcript	1	878	0.383827	0	0	0	0	0	0
ENSMUSG00002076032			8	101	0.49505	0	0	0	0	0	0
ENSMUSG00002074953			14	93	0.344086	0	0	0	0	0	0
ENSMUSG00002075318			18	70	0.357143	0	0	0	0	0	0
ENSMUSG00002075319			3	110	0.572727	0	1	0	0	0	0
ENSMUSG00002076009			16	129	0.418605	0	0	0	0	0	0
ENSMUSG00000094172			JH584299.1	1446	0.472337	0	0	0	0	0	0
ENSMUSG00002075686			8	94	0.478723	0	0	0	0	0	0
ENSMUSG00002075323			2	101	0.386139	0	0	0	0	0	0
ENSMUSG00002076417			14	107	0.420561	0	0	0	0	0	0
ENSMUSG00002074961			6	137	0.59854	0	0	0	0	0	0
ENSMUSG00002074962			2	188	0.351064	7	0	10	0	0	0
ENSMUSG00002074923			7	108	0.453704	0	0	0	0	0	0
ENSMUSG00002076057			1	138	0.797101	0	0	0	0	0	0
ENSMUSG00002074912			1	96	0.416667	0	0	0	0	0	0
ENSMUSG00002076059			7	121	0.495868	0	0	0	0	0	0
ENSMUSG00002074927			7	92	0.423913	0	0	0	0	0	0
ENSMUSG00002076061			7	76	0.302632	0	0	0	0	0	0
ENSMUSG00002074969			19	56	0.732143	0	3	5	0	0	8
ENSMUSG00002074970			GL456385.1	101	0.50495	0	0	0	0	0	0
ENSMUSG00002074971			8	95	0.421053	0	0	0	0	0	0
ENSMUSG00002074932			12	97	0.536082	0	0	0	0	0	0
ENSMUSG00002074933			5	78	0.576923	0	0	0	0	0	0
ENSMUSG00002074974			Y	110	0.618182	0	0	0	0	0	0
ENSMUSG00002074975			19	82	0.560976	0	0	0	0	0	0
ENSMUSG00000106759		vomeronasal 2, receptor, pseudogene 28	5	744	0.409946	0	0	0	0	0	0
ENSMUSG00002074937			8	107	0.682243	0	0	0	0	0	0
ENSMUSG00002074938			9	77	0.584416	0	0	0	0	0	0
ENSMUSG00002074979			6	110	0.581818	0	0	0	0	2	0
ENSMUSG00002076073			1	89	0.449438	0	0	0	0	0	0
ENSMUSG00002074981			10	97	0.546392	0	0	0	0	0	0
ENSMUSG00002076075			2	127	0.385827	0	0	0	0	0	0
ENSMUSG00002074983			4	101	0.376238	0	0	0	0	0	0
ENSMUSG00002076077			5	46	0.5	0	0	0	0	0	0
ENSMUSG00002076078			19	66	0.318182	0	0	0	0	0	0
ENSMUSG00002074986			6	99	0.474747	0	0	0	0	0	0
ENSMUSG00002074987			10	77	0.350649	0	0	0	0	0	0
ENSMUSG00002076081			11	78	0.461538	0	0	0	0	0	0
ENSMUSG00002075353			16	121	0.487603	0	0	0	0	0	0
ENSMUSG00002074990			1	110	0.554545	0	0	0	0	1	0
ENSMUSG00002076084			17	193	0.440415	10	0	0	3	1	0
ENSMUSG00002076085			13	67	0.402985	0	0	0	0	0	0
ENSMUSG00002074993			17	84	0.52381	0	0	0	0	0	0
ENSMUSG00002074994			15	86	0.581395	0	0	0	0	0	0
ENSMUSG00002076088			X	85	0.388235	0	0	0	0	0	0
ENSMUSG00002074956			2	187	0.411765	0	0	0	0	0	0
ENSMUSG00002076090			16	151	0.463576	0	0	0	0	0	0
ENSMUSG00002076091			12	78	0.666667	0	0	0	0	0	0
ENSMUSG00002074999			4	125	0.592	0	0	0	0	0	0
ENSMUSG00002075000			12	79	0.56962	0	0	0	0	0	0
ENSMUSG00002075001			11	71	0.859155	0	0	0	0	0	0
ENSMUSG00002075366			13	94	0.574468	0	0	0	0	0	0
ENSMUSG00002074963			7	110	0.563636	0	0	0	0	0	0
ENSMUSG00002075004			1	126	0.571429	0	0	0	0	0	0
ENSMUSG00002076098			8	190	0.442105	0	0	0	0	0	0
ENSMUSG00002075006			7	121	0.495868	0	0	0	0	0	0
ENSMUSG00002076060			7	110	0.6	0	0	0	0	0	0
ENSMUSG00002075008			18	118	0.372881	0	0	1	0	0	0
ENSMUSG00002075009			3	76	0.434211	0	0	0	0	0	0
ENSMUSG00002075010			12	110	0.618182	0	0	0	0	0	0
ENSMUSG00002075011			15	126	0.555556	0	0	0	0	0	0
ENSMUSG00002075012			3	100	0.45	0	0	0	0	0	0
ENSMUSG00002076106			4	126	0.579365	0	0	0	0	0	0
ENSMUSG00002076107			1	70	0.557143	0	0	0	0	0	0
ENSMUSG00002076108			4	96	0.5625	0	0	0	0	0	0
ENSMUSG00002075016			18	63	0.761905	0	0	0	0	0	0
ENSMUSG00002075017			10	155	0.406452	0	0	0	1	0	0
ENSMUSG00002075018			13	119	0.420168	0	0	0	0	0	0
ENSMUSG00002075019			10	104	0.519231	0	0	0	0	0	0
ENSMUSG00002075020			7	101	0.49505	0	0	0	0	0	0
ENSMUSG00002075021			3	121	0.495868	0	0	0	0	0	0
ENSMUSG00002075022			X	56	0.446429	0	0	0	0	0	0
ENSMUSG00002075023			3	110	0.618182	0	0	0	0	0	0
ENSMUSG00002075024			2	78	0.551282	0	0	0	0	0	0
ENSMUSG00002075025			1	110	0.563636	0	0	0	0	0	0
ENSMUSG00002075026			11	77	0.558442	0	0	0	0	0	0
ENSMUSG00002075027			3	74	0.5	0	0	0	0	0	0
ENSMUSG00002075028			2	233	0.55794	0	0	0	0	0	0
ENSMUSG00002076122			6	77	0.506494	0	0	0	0	0	0
ENSMUSG00002075030			17	86	0.383721	5	1	5	0	4	0
ENSMUSG00002075031			2	103	0.359223	0	0	0	0	0	0
ENSMUSG00002076004			17	90	0.244444	0	0	3	0	1	0
ENSMUSG00002075033			2	126	0.579365	0	0	0	0	0	0
ENSMUSG00002075034			2	126	0.595238	0	0	0	0	0	0
ENSMUSG00002075035			7	208	0.331731	0	0	0	0	0	0
ENSMUSG00002075400			GL456239.1	98	0.44898	0	0	0	0	0	0
ENSMUSG00002076130			13	108	0.296296	0	0	0	0	0	0
ENSMUSG00002075038			7	107	0.682243	0	0	0	0	0	0
ENSMUSG00002075403			13	129	0.643411	0	0	0	0	0	0
ENSMUSG00002076133			X	69	0.434783	0	0	0	0	0	0
ENSMUSG00000119162			16	133	0.481203	0	0	0	1	0	0
ENSMUSG00000118636		EF-hand calcium binding domain 10 (EFCAB10) pseudogene	5	239	0.414226	0	0	0	0	0	0
ENSMUSG00002076136			2	91	0.296703	0	0	0	0	0	0
ENSMUSG00002076137			14	110	0.563636	0	0	0	0	0	0
ENSMUSG00002075045			13	138	0.637681	0	0	0	0	0	0
ENSMUSG00002075046			10	83	0.590361	0	0	0	0	0	0
ENSMUSG00002075047			3	129	0.612403	0	0	0	0	0	0
ENSMUSG00002075048			5	114	0.350877	0	0	0	0	0	0
ENSMUSG00002075049			16	110	0.572727	0	0	0	0	0	0
ENSMUSG00002075050			9	121	0.495868	0	0	0	0	0	0
ENSMUSG00002074930			5	361	0.584488	0	0	0	0	0	0
ENSMUSG00002075052			8	101	0.50495	0	1	2	0	2	0
ENSMUSG00000118648		cytochrome P450, family 2, subfamily b like pseudgene	7	60	0.516667	0	0	0	0	0	0
ENSMUSG00002075054			19	125	0.424	0	0	0	2	0	0
ENSMUSG00002075055			2	104	0.317308	0	0	0	0	0	0
ENSMUSG00002075420			14	85	0.317647	0	0	0	0	0	0
ENSMUSG00002075057			X	83	0.518072	0	0	0	0	0	0
ENSMUSG00002075058			12	123	0.463415	0	0	0	0	0	0
ENSMUSG00002075059			3	128	0.5	0	0	0	0	0	0
ENSMUSG00002075060			15	86	0.546512	0	0	0	0	0	0
ENSMUSG00002076154			17	126	0.579365	0	0	0	2	0	0
ENSMUSG00002075062			4	149	0.52349	0	0	4	0	0	0
ENSMUSG00002075063			17	110	0.554545	0	0	0	0	0	0
ENSMUSG00002076157			7	110	0.572727	0	0	0	0	0	0
ENSMUSG00002076158			7	119	0.336134	2	0	0	0	0	0
ENSMUSG00002075066			5	85	0.4	0	0	0	0	0	0
ENSMUSG00002076160			3	94	0.62766	5	0	0	2	0	0
ENSMUSG00002075068			8	98	0.612245	0	0	0	0	0	0
ENSMUSG00002075069			4	110	0.572727	0	0	0	0	0	0
ENSMUSG00000118666		Zinc finger protein 932 (Zfp932) pseudogene	13	1567	0.374601	0	0	0	0	0	0
ENSMUSG00002076164			5	109	0.302752	0	0	0	0	0	0
ENSMUSG00002074951			1	127	0.480315	0	0	0	0	0	0
ENSMUSG00002074952			12	101	0.386139	0	0	0	0	0	0
ENSMUSG00000118670		mucin 19	15	22800	0.594167	3	0	0	0	0	0
ENSMUSG00002075075			11	123	0.536585	16	7	14	1	4	10
ENSMUSG00002075076			1	106	0.528302	0	0	0	0	0	0
ENSMUSG00002075077			1	57	0.701754	0	0	0	0	0	0
ENSMUSG00002076171			4	126	0.571429	0	0	0	0	0	0
ENSMUSG00002075079			15	140	0.492857	0	0	0	0	0	0
ENSMUSG00002076173			16	57	0.736842	3428	4551	6020	3429	3551	2794
ENSMUSG00002075081			9	123	0.341463	0	0	0	0	0	0
ENSMUSG00002076903			8	86	0.348837	0	0	2	0	0	0
ENSMUSG00002075083			2	96	0.59375	0	0	0	0	0	0
ENSMUSG00002075084			4	106	0.462264	0	0	0	0	0	0
ENSMUSG00002075085			2	111	0.36036	3	0	0	5	0	0
ENSMUSG00002076179			1	72	0.361111	0	0	0	0	0	0
ENSMUSG00002075451			4	121	0.495868	0	0	0	0	0	0
ENSMUSG00002075452			17	94	0.287234	0	0	0	0	0	0
ENSMUSG00002075089			12	103	0.475728	0	0	6	0	4	0
ENSMUSG00002076183			6	104	0.298077	0	0	0	1	1	0
ENSMUSG00002076184			6	126	0.603175	1	0	1	0	2	0
ENSMUSG00002075092			16	121	0.495868	0	0	0	0	0	0
ENSMUSG00002074972			13	91	0.472527	0	0	0	0	0	0
ENSMUSG00002075094			X	81	0.407407	2	11	0	0	0	0
ENSMUSG00002075095			1	62	0.645161	0	0	0	0	0	0
ENSMUSG00002076189			1	164	0.347561	0	1	0	0	0	0
ENSMUSG00002076190			12	91	0.604396	0	0	0	0	0	0
ENSMUSG00002074977			18	106	0.103774	0	0	0	0	0	0
ENSMUSG00002074978			3	114	0.570175	0	0	0	0	0	0
ENSMUSG00002076193			11	127	0.559055	0	0	0	0	0	0
ENSMUSG00002075101			18	82	0.621951	0	0	0	0	0	0
ENSMUSG00002075102			6	354	0.485876	2	5	0	0	5	0
ENSMUSG00002075103			2	82	0.487805	8	0	0	1	0	0
ENSMUSG00002075104			13	127	0.637795	0	0	0	0	0	0
ENSMUSG00002075105			18	91	0.505495	0	0	0	0	0	0
ENSMUSG00002076199			2	122	0.672131	0	0	0	0	0	0
ENSMUSG00000118719			8	132	0.477273	0	0	0	0	0	0
ENSMUSG00002075108			8	102	0.5	0	0	0	0	0	0
ENSMUSG00002075109			2	143	0.636364	0	0	0	0	0	0
ENSMUSG00002076566			7	90	0.588889	0	0	0	0	0	0
ENSMUSG00002075111			7	90	0.433333	0	0	0	0	0	0
ENSMUSG00002075112			X	109	0.568807	0	0	0	0	0	0
ENSMUSG00002075113			13	138	0.666667	0	0	0	0	0	0
ENSMUSG00000118728			9	72	0.416667	0	0	0	0	0	0
ENSMUSG00002075115			2	125	0.576	0	0	0	0	0	0
ENSMUSG00002076209			4	121	0.495868	0	0	0	0	0	0
ENSMUSG00002076089			16	66	0.409091	0	0	0	0	0	0
ENSMUSG00002075118			12	78	0.525641	0	0	0	0	0	0
ENSMUSG00002075119			1	134	0.477612	0	0	0	0	0	0
ENSMUSG00002076213			12	112	0.455357	0	0	0	0	0	0
ENSMUSG00002076214			13	91	0.274725	0	0	0	0	0	0
ENSMUSG00002075122			10	109	0.623853	0	0	0	0	0	0
ENSMUSG00002075123			16	71	0.521127	0	0	0	0	0	0
ENSMUSG00002076096			X	110	0.381818	0	0	0	0	0	0
ENSMUSG00002075125			19	119	0.336134	2	0	0	0	0	0
ENSMUSG00002076219			5	122	0.442623	0	0	0	0	0	0
ENSMUSG00002075127			7	110	0.545455	0	0	0	0	0	0
ENSMUSG00002075128			8	122	0.590164	0	0	0	0	0	0
ENSMUSG00002075129			12	114	0.561404	0	0	0	0	0	0
ENSMUSG00002075130			X	123	0.471545	0	0	0	0	0	0
ENSMUSG00002075131			9	120	0.408333	0	0	0	0	0	0
ENSMUSG00002075132			8	140	0.485714	4	4	18	0	4	0
ENSMUSG00002075133			7	110	0.627273	0	0	0	0	0	0
ENSMUSG00002075134			7	96	0.53125	0	0	0	0	0	0
ENSMUSG00002076956			2	127	0.401575	0	0	0	0	0	0
ENSMUSG00002075136			18	111	0.45045	0	0	0	0	0	0
ENSMUSG00002076230			7	101	0.49505	0	0	0	0	0	0
ENSMUSG00002075138			10	94	0.521277	0	0	0	0	0	0
ENSMUSG00002076232			2	86	0.453488	0	0	0	0	0	0
ENSMUSG00002075140			2	108	0.388889	0	0	0	0	0	0
ENSMUSG00002075141			2	82	0.439024	3	0	0	0	0	0
ENSMUSG00002075506			8	79	0.43038	0	0	0	0	0	0
ENSMUSG00002075143			2	121	0.371901	0	0	0	0	0	0
ENSMUSG00002075144			16	70	0.6	0	0	0	0	0	0
ENSMUSG00002075145			10	109	0.477064	0	0	0	0	0	0
ENSMUSG00002076239			4	125	0.584	0	2	0	0	0	0
ENSMUSG00002076240			17	102	0.5	0	0	0	0	0	0
ENSMUSG00002075148			14	107	0.672897	0	0	0	0	0	0
ENSMUSG00000118778			17	88	0.443182	0	0	0	0	0	0
ENSMUSG00002075150			12	77	0.558442	0	0	0	0	0	0
ENSMUSG00002075151			9	184	0.61413	4	0	0	0	6	0
ENSMUSG00002075152			8	63	0.301587	0	0	0	0	0	0
ENSMUSG00002076125			2	125	0.592	0	0	0	0	0	0
ENSMUSG00002076247			10	99	0.393939	0	0	0	0	0	0
ENSMUSG00002075155			3	119	0.420168	0	0	0	0	0	0
ENSMUSG00000110493		olfactory receptor 841, pseudogene 1	9	848	0.376179	0	0	0	0	0	0
ENSMUSG00002075157			7	78	0.397436	0	0	0	0	0	0
ENSMUSG00002075158			14	126	0.587302	0	0	0	0	0	0
ENSMUSG00002075159			2	127	0.393701	0	0	0	0	0	0
ENSMUSG00002076253			1	83	0.373494	0	0	0	0	0	0
ENSMUSG00002075889			13	80	0.5	0	0	0	0	0	0
ENSMUSG00002075162			2	114	0.333333	0	0	0	0	0	0
ENSMUSG00002076256			X	124	0.403226	0	0	0	0	0	0
ENSMUSG00002075164			3	272	0.547794	0	0	0	0	0	0
ENSMUSG00002075165			1	98	0.479592	0	0	0	0	0	0
ENSMUSG00000118018		novel transcript	18	3704	0.37527	3	0	0	1	1	0
ENSMUSG00002076260			7	98	0.438776	1	2	0	0	0	0
ENSMUSG00002075168			6	62	0.419355	0	0	0	0	0	0
ENSMUSG00002075169			15	109	0.623853	0	0	0	0	0	0
ENSMUSG00002076263			2	126	0.579365	0	0	0	0	0	0
ENSMUSG00002075171			10	76	0.407895	0	0	0	0	0	0
ENSMUSG00002076144			2	121	0.421488	0	0	0	0	0	0
ENSMUSG00002075173			3	214	0.593458	0	0	0	0	0	0
ENSMUSG00002076267			X	86	0.395349	0	0	0	0	0	0
ENSMUSG00002076268			14	86	0.476744	0	0	0	0	0	0
ENSMUSG00002075176			10	126	0.571429	1	0	0	0	1	0
ENSMUSG00002075177			2	90	0.388889	0	0	0	0	0	0
ENSMUSG00002075178			2	127	0.393701	0	0	0	0	0	0
ENSMUSG00002076272			5	144	0.506944	0	0	0	0	0	0
ENSMUSG00002075180			3	141	0.64539	4	7	4	6	2	9
ENSMUSG00002076274			7	88	0.579545	0	3	1	6	0	0
ENSMUSG00002075182			13	107	0.570093	0	3	0	0	0	0
ENSMUSG00000111781		olfactory receptor 939, pseudogene 1	9	766	0.369452	0	0	0	0	0	0
ENSMUSG00002075184			13	110	0.554545	0	0	0	0	0	0
ENSMUSG00002075185			13	125	0.56	0	0	0	0	0	0
ENSMUSG00002075550			1	110	0.572727	0	0	0	0	0	0
ENSMUSG00002076280			1	89	0.325843	2	0	0	0	0	2
ENSMUSG00002075188			4	57	0.736842	1	0	0	0	0	0
ENSMUSG00002076282			X	126	0.579365	0	0	0	0	0	0
ENSMUSG00002075190			2	122	0.368852	0	0	0	0	0	0
ENSMUSG00002075191			8	175	0.445714	0	0	0	0	0	0
ENSMUSG00002075192			17	174	0.431034	0	0	0	0	0	0
ENSMUSG00002075072			8	125	0.536	0	0	0	0	0	0
ENSMUSG00002075073			17	121	0.495868	0	0	0	0	0	0
ENSMUSG00002075559			7	70	0.5	2	5	0	0	0	0
ENSMUSG00002075196			6	83	0.493976	0	0	0	0	0	0
ENSMUSG00002075197			9	123	0.373984	0	0	0	0	0	0
ENSMUSG00000116563		novel protein	2	180	0.455556	0	0	0	0	0	0
ENSMUSG00002075199			16	117	0.376068	0	0	0	0	0	0
ENSMUSG00002075564			5	79	0.468354	0	0	0	0	0	0
ENSMUSG00002075201			2	121	0.413223	0	0	0	0	0	0
ENSMUSG00002075202			10	111	0.423423	0	0	0	0	0	0
ENSMUSG00002076296			2	126	0.404762	0	0	0	0	0	0
ENSMUSG00002075204			3	110	0.627273	0	0	0	0	0	0
ENSMUSG00002076298			3	121	0.479339	2	0	0	0	0	0
ENSMUSG00002076299			13	138	0.666667	0	6	0	0	0	0
ENSMUSG00002075207			17	92	0.576087	0	0	0	0	0	0
ENSMUSG00002075208			2	458	0.399563	0	0	0	0	0	0
ENSMUSG00002076302			6	184	0.472826	4	3	0	0	0	4
ENSMUSG00002075574			14	114	0.263158	0	0	0	0	0	0
ENSMUSG00002075211			7	110	0.563636	0	0	1	0	1	0
ENSMUSG00002075212			6	207	0.318841	0	0	0	0	0	0
ENSMUSG00002075213			1	121	0.495868	0	0	0	0	0	0
ENSMUSG00002075214			7	70	0.571429	0	0	0	0	0	0
ENSMUSG00002075215			9	125	0.56	3	0	0	0	0	0
ENSMUSG00002075216			4	76	0.671053	0	0	0	0	0	0
ENSMUSG00002075217			7	95	0.421053	0	0	0	0	0	0
ENSMUSG00002075218			13	97	0.309278	0	0	0	0	0	0
ENSMUSG00002076312			X	88	0.375	0	0	0	0	0	0
ENSMUSG00002076313			11	81	0.555556	0	0	1	0	0	0
ENSMUSG00002075585			6	132	0.325758	0	0	0	0	0	0
ENSMUSG00002075222			4	77	0.636364	0	0	0	0	0	0
ENSMUSG00000119431			2	133	0.488722	0	0	0	0	0	0
ENSMUSG00002075224			6	91	0.56044	0	0	0	0	0	0
ENSMUSG00002075225			1	110	0.590909	0	0	0	0	0	0
ENSMUSG00002076319			15	107	0.672897	0	0	0	3	0	0
ENSMUSG00002075227			11	78	0.512821	0	2	0	0	0	0
ENSMUSG00002076321			3	110	0.618182	0	0	0	0	0	0
ENSMUSG00002075229			5	122	0.221311	0	0	0	0	0	0
ENSMUSG00000118903			15	132	0.424242	0	0	0	0	0	0
ENSMUSG00002075231			4	133	0.842105	3	9	11	5	8	3
ENSMUSG00002075232			16	126	0.579365	0	0	0	0	0	0
ENSMUSG00002075233			4	109	0.559633	0	0	0	0	0	0
ENSMUSG00002075234			5	110	0.627273	0	0	0	0	0	0
ENSMUSG00002076328			1	110	0.618182	0	0	0	0	0	0
ENSMUSG00002075236			10	129	0.325581	0	0	0	0	0	0
ENSMUSG00002075601			13	125	0.592	0	0	0	0	0	0
ENSMUSG00002075117			3	109	0.605505	0	0	0	0	0	0
ENSMUSG00002075238			6	129	0.511628	0	0	0	0	0	0
ENSMUSG00002075240			2	104	0.317308	0	0	0	0	0	0
ENSMUSG00002075241			17	102	0.5	0	0	0	0	0	0
ENSMUSG00002076335			12	67	0.447761	0	0	0	0	0	0
ENSMUSG00002075243			9	73	0.424658	0	0	0	0	0	0
ENSMUSG00002075244			11	54	0.62963	0	0	0	0	0	0
ENSMUSG00002075245			14	89	0.213483	0	0	0	0	0	0
ENSMUSG00002076339			1	80	0.475	0	0	0	0	0	0
ENSMUSG00002075247			15	199	0.502513	0	0	0	0	0	4
ENSMUSG00002075248			18	70	0.271429	0	0	0	0	1	0
ENSMUSG00000094722			JH584298.1	1446	0.464039	0	0	0	0	0	0
ENSMUSG00002075250			19	159	0.471698	1	0	3	1	0	4
ENSMUSG00002076344			2	96	0.5625	0	0	0	0	0	0
ENSMUSG00000094728			GL456221.1	372	0.502688	0	0	0	0	0	0
ENSMUSG00002076346			1	82	0.52439	0	0	0	0	0	0
ENSMUSG00002075254			3	110	0.627273	0	0	0	0	0	0
ENSMUSG00002075619			4	64	0.34375	0	0	0	0	0	0
ENSMUSG00002075620			11	63	0.539683	0	0	0	0	0	0
ENSMUSG00002075257			4	110	0.754545	0	0	0	0	0	0
ENSMUSG00002075258			7	210	0.438095	0	0	0	0	0	0
ENSMUSG00002076352			17	199	0.698492	9	3	7	21	6	4
ENSMUSG00000094741			GL456354.1	1224	0.482843	0	0	0	0	0	0
ENSMUSG00002076354			10	119	0.504202	0	0	0	0	0	0
ENSMUSG00002075262			8	80	0.575	0	0	0	0	0	0
ENSMUSG00002075263			16	68	0.544118	0	0	0	0	0	0
ENSMUSG00002075264			9	119	0.361345	0	0	0	0	0	0
ENSMUSG00000095450			GL456221.1	372	0.502688	0	0	0	0	0	0
ENSMUSG00002075630			X	101	0.49505	0	0	0	0	0	0
ENSMUSG00002075267			12	64	0.375	0	0	0	0	0	0
ENSMUSG00002075268			6	92	0.445652	0	0	0	0	0	0
ENSMUSG00002075269			6	111	0.468468	0	0	0	0	0	3
ENSMUSG00002076727			7	107	0.579439	0	0	0	0	0	0
ENSMUSG00002076485			4	121	0.495868	0	0	0	0	0	0
ENSMUSG00002075272			2	118	0.372881	0	0	0	0	0	0
ENSMUSG00002076366			1	62	0.645161	0	0	0	0	0	0
ENSMUSG00002076367			13	138	0.666667	0	0	0	0	0	0
ENSMUSG00002075275			6	180	0.322222	0	0	0	0	0	0
ENSMUSG00002076369			13	142	0.507042	0	0	0	0	0	0
ENSMUSG00002076370			7	217	0.382488	0	0	0	0	0	0
ENSMUSG00002076734			6	70	0.328571	0	0	2	0	0	0
ENSMUSG00002075279			12	98	0.489796	0	0	0	0	0	0
ENSMUSG00002075644			6	110	0.618182	0	0	0	0	0	0
ENSMUSG00002076738			9	92	0.445652	0	0	0	0	0	0
ENSMUSG00002075646			X	78	0.538462	0	0	0	0	0	0
ENSMUSG00002076376			9	101	0.247525	0	0	0	0	0	0
ENSMUSG00002075284			X	69	0.565217	0	0	0	0	0	0
ENSMUSG00002076742			11	77	0.545455	0	0	0	0	0	0
ENSMUSG00002075286			6	101	0.49505	0	0	0	0	0	0
ENSMUSG00002076744			14	136	0.382353	0	0	0	0	0	0
ENSMUSG00002076381			3	65	0.615385	0	0	0	0	0	0
ENSMUSG00002075289			1	107	0.672897	0	0	0	0	0	0
ENSMUSG00002076018			12	117	0.393162	0	0	0	0	0	0
ENSMUSG00002075655			9	101	0.564356	0	0	0	0	0	0
ENSMUSG00002075292			4	129	0.317829	0	0	0	0	0	0
ENSMUSG00000095505			JH584296.1	837	0.46595	0	0	0	0	0	0
ENSMUSG00002075294			8	121	0.479339	1	0	0	0	0	0
ENSMUSG00002076388			2	123	0.333333	0	0	0	0	0	0
ENSMUSG00002075296			X	127	0.472441	0	0	0	0	0	0
ENSMUSG00002075297			17	59	0.79661	0	0	0	0	0	0
ENSMUSG00002076391			18	104	0.567308	0	0	0	0	0	0
ENSMUSG00000119010			14	132	0.484848	0	0	0	0	0	0
ENSMUSG00002075300			8	145	0.193103	0	0	0	0	0	0
ENSMUSG00002075301			11	144	0.284722	0	0	0	0	0	0
ENSMUSG00002075666			6	125	0.584	0	0	0	0	0	3
ENSMUSG00002075303			16	65	0.307692	0	0	0	0	0	0
ENSMUSG00002075304			11	177	0.384181	0	0	0	0	0	0
ENSMUSG00002075305			8	58	0.327586	0	0	0	0	0	0
ENSMUSG00002075306			12	120	0.358333	0	0	0	0	0	0
ENSMUSG00002076764			5	78	0.564103	0	0	0	0	0	0
ENSMUSG00002075308			16	111	0.279279	0	0	0	0	0	0
ENSMUSG00002076402			4	129	0.395349	0	0	0	0	0	0
ENSMUSG00002076403			5	69	0.449275	0	0	0	0	0	0
ENSMUSG00002076404			2	123	0.390244	5	0	0	0	0	0
ENSMUSG00002075312			3	138	0.557971	0	0	0	0	0	0
ENSMUSG00002075677			13	76	0.671053	0	0	0	0	0	0
ENSMUSG00002076407			13	100	0.47	0	0	0	0	0	0
ENSMUSG00000118852			8	132	0.507576	0	0	0	0	0	0
ENSMUSG00002075316			6	96	0.270833	0	0	0	0	0	0
ENSMUSG00002075317			1	110	0.572727	0	0	0	0	0	0
ENSMUSG00002076046			19	261	0.35249	0	0	0	0	0	0
ENSMUSG00002075683			18	50	0.92	0	0	0	0	0	0
ENSMUSG00002076413			X	128	0.375	0	0	0	0	0	0
ENSMUSG00002075321			7	110	0.609091	0	0	0	0	0	0
ENSMUSG00002076414			1	78	0.525641	0	0	0	0	0	0
ENSMUSG00002076780			1	121	0.495868	0	0	0	0	0	0
ENSMUSG00002075688			18	110	0.590909	0	0	0	0	0	0
ENSMUSG00002076418			6	110	0.618182	0	0	0	0	0	0
ENSMUSG00002076419			7	80	0.5875	0	0	0	0	0	0
ENSMUSG00002075691			8	77	0.545455	0	0	0	0	0	0
ENSMUSG00002076421			17	88	0.534091	13	10	8	3	19	10
ENSMUSG00002076058			8	125	0.576	0	0	0	0	0	0
ENSMUSG00002075330			6	171	0.479532	0	0	0	0	0	0
ENSMUSG00000119589			13	133	0.398496	0	2	0	0	6	1
ENSMUSG00002075332			19	407	0.447174	0	0	0	0	0	0
ENSMUSG00002076426			5	93	0.462366	0	0	0	0	0	0
ENSMUSG00002075334			11	126	0.587302	0	0	0	0	0	0
ENSMUSG00002076428			6	110	0.563636	0	0	0	0	0	0
ENSMUSG00002075336			13	114	0.377193	1	1	0	0	2	0
ENSMUSG00002075337			2	101	0.49505	0	0	0	0	0	0
ENSMUSG00002075338			19	78	0.576923	5	8	1	7	12	0
ENSMUSG00002075339			7	66	0.575758	0	0	0	0	0	0
ENSMUSG00002075340			13	108	0.268519	0	0	0	0	0	0
ENSMUSG00002075341			11	73	0.260274	0	0	0	0	0	0
ENSMUSG00002075342			6	102	0.5	0	0	0	0	0	0
ENSMUSG00002075343			13	83	0.325301	0	0	0	0	0	0
ENSMUSG00002075344			6	214	0.406542	0	0	0	0	0	0
ENSMUSG00002075345			15	232	0.37069	0	0	0	0	0	0
ENSMUSG00002075346			3	109	0.33945	4	7	0	0	0	0
ENSMUSG00002075347			7	126	0.571429	0	0	0	0	0	0
ENSMUSG00002075348			3	107	0.672897	0	0	0	0	0	0
ENSMUSG00002075349			15	102	0.5	0	0	0	0	0	0
ENSMUSG00002075350			13	116	0.534483	0	0	0	0	0	0
ENSMUSG00002075715			10	73	0.315068	0	0	0	0	0	0
ENSMUSG00002075352			7	94	0.595745	0	0	0	0	0	0
ENSMUSG00002075717			15	126	0.571429	0	0	0	0	0	0
ENSMUSG00002075354			4	90	0.5	0	0	0	0	0	0
ENSMUSG00002075355			1	122	0.5	0	0	0	0	0	0
ENSMUSG00002076449			5	78	0.589744	0	0	0	0	0	0
ENSMUSG00002076450			11	108	0.509259	0	0	0	0	0	0
ENSMUSG00002076451			12	70	0.7	0	0	0	0	0	0
ENSMUSG00000094915			GL456212.1	366	0.418033	0	0	0	0	0	0
ENSMUSG00002075360			4	74	0.364865	3	2	0	0	5	0
ENSMUSG00002075361			8	153	0.581699	0	0	0	0	0	0
ENSMUSG00000119100			6	132	0.469697	0	0	0	0	0	0
ENSMUSG00002076456			4	96	0.46875	0	3	4	0	5	0
ENSMUSG00002075364			6	101	0.49505	0	0	0	0	0	0
ENSMUSG00002075365			4	121	0.38843	0	0	0	0	0	0
ENSMUSG00002076823			10	237	0.518987	0	0	0	0	0	0
ENSMUSG00002075367			15	92	0.336957	0	0	0	0	0	0
ENSMUSG00002075368			1	88	0.625	0	0	0	0	0	0
ENSMUSG00000119112			2	132	0.484848	0	0	0	0	0	0
ENSMUSG00002075370			14	105	0.552381	0	0	0	0	0	0
ENSMUSG00002075371			2	68	0.279412	0	0	0	0	0	0
ENSMUSG00002075372			19	126	0.563492	0	0	0	0	0	0
ENSMUSG00002075373			8	111	0.558559	0	0	0	0	0	0
ENSMUSG00002075374			10	72	0.458333	0	0	0	0	0	0
ENSMUSG00002075375			10	162	0.462963	0	0	0	0	0	0
ENSMUSG00002075376			15	60	0.666667	0	0	0	0	0	0
ENSMUSG00002075377			1	75	0.466667	0	0	0	0	0	0
ENSMUSG00002075378			1	96	0.59375	0	0	0	0	0	0
ENSMUSG00002076472			2	103	0.621359	0	0	0	0	0	0
ENSMUSG00002076473			2	96	0.322917	0	0	0	0	0	0
ENSMUSG00002075381			19	132	0.333333	0	0	0	0	0	0
ENSMUSG00002075382			16	110	0.636364	0	0	0	0	0	0
ENSMUSG00002075383			11	97	0.536082	0	0	0	0	0	0
ENSMUSG00002075384			7	96	0.59375	0	0	0	0	0	0
ENSMUSG00002075385			13	196	0.418367	0	0	0	0	0	0
ENSMUSG00002076479			18	74	0.810811	0	0	0	0	0	0
ENSMUSG00002076480			4	60	0.55	0	0	0	0	0	0
ENSMUSG00002075388			11	96	0.65625	0	0	0	0	0	0
ENSMUSG00002076482			15	101	0.49505	0	0	0	0	0	0
ENSMUSG00002075390			X	92	0.532609	0	0	0	0	0	0
ENSMUSG00002076484			19	104	0.403846	0	0	0	0	0	0
ENSMUSG00002075513			9	67	0.432836	0	0	0	0	0	0
ENSMUSG00002075757			X	100	0.59	0	0	0	0	0	0
ENSMUSG00002076487			11	109	0.550459	0	0	0	0	0	0
ENSMUSG00002075395			13	108	0.564815	0	0	0	0	0	0
ENSMUSG00002076489			2	89	0.426966	0	0	6	3	0	0
ENSMUSG00002075397			6	96	0.65625	0	0	0	0	0	0
ENSMUSG00002076491			9	69	0.565217	0	0	0	0	0	12
ENSMUSG00002075399			X	115	0.391304	0	0	0	0	1	0
ENSMUSG00002075764			4	60	0.716667	0	0	0	0	0	0
ENSMUSG00002076494			14	161	0.391304	0	0	0	0	0	0
ENSMUSG00002075766			5	98	0.418367	0	0	0	0	0	0
ENSMUSG00002076860			7	129	0.465116	7	9	1	2	4	0
ENSMUSG00002076861			12	121	0.561983	0	0	0	0	0	0
ENSMUSG00002075769			7	101	0.50495	0	0	0	0	0	0
ENSMUSG00000119163			13	133	0.390977	2	0	0	0	4	0
ENSMUSG00002076500			2	137	0.576642	0	0	0	0	0	0
ENSMUSG00000119166			8	92	0.380435	0	0	0	0	0	0
ENSMUSG00002076502			7	110	0.545455	0	0	0	0	0	0
ENSMUSG00002075410			4	84	0.5	0	0	0	0	0	0
ENSMUSG00000119172			6	129	0.503876	0	0	0	0	0	0
ENSMUSG00002075412			X	119	0.478992	0	0	0	0	0	0
ENSMUSG00002075413			15	57	0.649123	0	0	0	0	0	0
ENSMUSG00002075414			5	150	0.573333	0	0	0	0	0	0
ENSMUSG00002075415			3	127	0.307087	0	0	0	0	0	0
ENSMUSG00002076509			16	95	0.421053	0	0	0	0	0	0
ENSMUSG00002076510			2	120	0.425	0	0	0	0	0	0
ENSMUSG00002076511			5	87	0.402299	0	0	0	0	0	0
ENSMUSG00002076512			3	101	0.49505	0	0	0	0	0	0
ENSMUSG00002076877			6	74	0.648649	1	0	1	3	0	0
ENSMUSG00002075421			9	128	0.546875	1	1	0	0	0	0
ENSMUSG00002076515			13	138	0.666667	0	0	0	0	0	0
ENSMUSG00002075423			7	61	0.295082	0	0	0	0	0	0
ENSMUSG00002075424			16	98	0.561224	0	0	0	0	0	0
ENSMUSG00002075425			8	137	0.510949	0	0	0	0	0	0
ENSMUSG00002076519			7	110	0.590909	0	0	0	0	0	0
ENSMUSG00002076520			13	101	0.49505	0	0	0	0	0	0
ENSMUSG00002076521			5	110	0.609091	0	0	0	0	0	0
ENSMUSG00002076522			4	103	0.533981	0	0	0	0	0	0
ENSMUSG00002075430			18	185	0.513514	0	0	0	0	0	0
ENSMUSG00002075431			2	370	0.391892	0	0	0	0	0	0
ENSMUSG00002075796			17	82	0.878049	0	0	0	0	0	0
ENSMUSG00002075433			14	118	0.525424	0	0	0	0	0	0
ENSMUSG00002075797			17	113	0.628319	0	0	0	0	0	0
ENSMUSG00002075435			18	121	0.495868	0	0	0	0	0	0
ENSMUSG00002075315			13	103	0.572816	0	0	0	0	0	0
ENSMUSG00002076530			13	171	0.444444	10	6	2	4	4	1
ENSMUSG00002076166			X	110	0.572727	0	0	0	0	0	0
ENSMUSG00002075439			2	65	0.446154	0	0	0	0	0	0
ENSMUSG00002075440			15	116	0.517241	0	0	0	0	0	0
ENSMUSG00002076534			4	77	0.519481	0	0	4	0	2	0
ENSMUSG00002076535			15	169	0.260355	0	0	0	0	0	0
ENSMUSG00000095092			GL456210.1	366	0.483607	0	0	0	0	0	0
ENSMUSG00002075444			13	141	0.680851	0	0	0	0	0	0
ENSMUSG00002075445			X	128	0.46875	0	0	0	0	0	0
ENSMUSG00000119221			X	114	0.403509	0	0	0	0	0	0
ENSMUSG00002076540			2	118	0.313559	0	0	0	0	0	0
ENSMUSG00002075448			6	187	0.588235	0	0	0	0	0	0
ENSMUSG00002075449			Y	110	0.618182	0	0	0	0	0	0
ENSMUSG00002076543			2	294	0.455782	0	0	0	0	0	0
ENSMUSG00000095779		novel pseudogene	4	1897	0.524512	0	0	0	0	0	0
ENSMUSG00002075816			19	70	0.6	0	0	0	0	0	0
ENSMUSG00002075453			11	216	0.527778	0	0	0	0	0	0
ENSMUSG00002075454			4	107	0.551402	0	0	0	0	0	0
ENSMUSG00002075455			17	110	0.618182	0	0	0	0	0	0
ENSMUSG00002075456			4	83	0.493976	0	0	0	0	0	0
ENSMUSG00002075821			12	135	0.474074	3	0	0	0	0	6
ENSMUSG00002075458			1	94	0.478723	0	0	0	0	0	0
ENSMUSG00002075459			8	97	0.402062	0	0	0	0	0	0
ENSMUSG00002075460			12	70	0.514286	0	0	0	0	0	0
ENSMUSG00002075825			X	68	0.514706	0	0	0	0	0	0
ENSMUSG00002075462			3	92	0.532609	0	0	0	0	0	0
ENSMUSG00002075099			13	119	0.546218	2	0	0	0	0	0
ENSMUSG00002075464			9	84	0.488095	0	0	0	0	0	0
ENSMUSG00002075465			15	62	0.66129	0	0	0	0	0	0
ENSMUSG00002076923			15	95	0.915789	0	0	0	0	0	0
ENSMUSG00002076560			2	124	0.290323	0	0	0	0	0	0
ENSMUSG00002075468			3	110	0.618182	0	0	0	0	0	0
ENSMUSG00002076562			12	109	0.577982	0	0	0	0	0	0
ENSMUSG00002076927			9	67	0.402985	0	0	0	0	0	0
ENSMUSG00002076564			5	76	0.644737	0	0	0	0	0	0
ENSMUSG00002075472			2	150	0.293333	0	0	0	0	0	0
ENSMUSG00002075473			16	110	0.581818	0	0	0	0	0	0
ENSMUSG00002076930			11	104	0.538462	0	0	0	0	1	0
ENSMUSG00002075475			5	138	0.565217	0	0	0	0	0	0
ENSMUSG00002075840			3	108	0.453704	0	0	0	0	0	0
ENSMUSG00002075477			4	110	0.627273	0	0	0	0	0	0
ENSMUSG00002075478			19	99	0.424242	0	0	0	0	0	0
ENSMUSG00002075479			4	72	0.486111	0	15	4	12	3	0
ENSMUSG00002075844			15	129	0.534884	0	0	0	0	0	0
ENSMUSG00002076574			12	63	0.31746	2	6	3	0	9	0
ENSMUSG00002075482			19	64	0.5625	0	0	0	0	0	0
ENSMUSG00002076576			17	61	0.491803	0	0	0	0	0	0
ENSMUSG00002075484			12	76	0.486842	0	0	0	0	0	0
ENSMUSG00002075485			4	77	0.571429	0	0	0	0	0	0
ENSMUSG00002075486			17	110	0.318182	0	1	1	0	0	0
ENSMUSG00002076580			2	92	0.358696	0	0	0	0	0	0
ENSMUSG00002075488			5	67	0.402985	4	0	1	0	0	0
ENSMUSG00002075489			4	110	0.418182	0	0	0	0	0	0
ENSMUSG00000110849		olfactory receptor 1545, pseudogene 1	9	375	0.410667	0	0	0	0	0	0
ENSMUSG00002075491			15	70	0.357143	0	0	0	0	0	0
ENSMUSG00002076585			2	126	0.404762	0	0	0	0	0	0
ENSMUSG00002075493			X	106	0.650943	0	0	0	0	0	0
ENSMUSG00002076951			5	77	0.532468	0	0	0	0	0	0
ENSMUSG00002076588			18	101	0.49505	0	0	0	0	0	0
ENSMUSG00002076589			1	101	0.50495	0	0	0	0	0	0
ENSMUSG00002075497			16	102	0.558824	0	0	0	0	0	0
ENSMUSG00002076591			3	110	0.581818	0	0	0	0	0	0
ENSMUSG00000115423		novel protein	2	944	0.474576	0	0	0	0	0	0
ENSMUSG00002075500			11	90	0.566667	0	0	0	0	0	0
ENSMUSG00002075501			1	56	0.714286	0	1	1	119	0	5
ENSMUSG00002075502			3	111	0.405405	0	0	0	0	0	0
ENSMUSG00002076596			12	136	0.485294	0	0	0	0	0	0
ENSMUSG00002076597			1	109	0.577982	0	0	0	0	0	0
ENSMUSG00002076598			7	123	0.390244	0	0	0	0	0	0
ENSMUSG00002075870			12	96	0.395833	0	0	0	0	0	4
ENSMUSG00002076964			11	136	0.536765	0	0	0	0	0	0
ENSMUSG00002075508			4	133	0.511278	0	0	0	0	0	0
ENSMUSG00002076602			5	93	0.354839	0	0	0	0	0	0
ENSMUSG00000111302		olfactory receptor 1236, pseudogene 1	2	509	0.365422	0	0	0	0	0	0
ENSMUSG00002075511			5	179	0.625698	0	0	0	0	0	0
ENSMUSG00002076605			13	121	0.495868	0	0	0	0	0	0
ENSMUSG00000118960			3	130	0.484615	0	0	0	0	0	0
ENSMUSG00002075514			4	88	0.431818	0	0	0	0	0	0
ENSMUSG00002075515			6	95	0.463158	0	0	0	0	0	0
ENSMUSG00002075516			11	93	0.591398	0	0	0	0	0	0
ENSMUSG00002076610			12	110	0.563636	0	0	0	0	0	0
ENSMUSG00002075518			2	96	0.583333	0	0	0	0	0	0
ENSMUSG00002075519			4	120	0.416667	0	0	0	0	0	0
ENSMUSG00002075520			4	91	0.681319	0	0	0	0	0	0
ENSMUSG00002076614			9	91	0.461538	0	0	0	0	0	0
ENSMUSG00002075522			11	84	0.321429	0	0	0	0	0	0
ENSMUSG00002075523			8	82	0.439024	0	0	0	0	0	0
ENSMUSG00002075524			9	57	0.736842	66	92	82	113	47	283
ENSMUSG00002076617			2	121	0.38843	0	0	0	0	0	0
ENSMUSG00002075526			16	113	0.460177	0	0	0	0	0	0
ENSMUSG00002075527			1	101	0.485149	0	0	0	0	0	0
ENSMUSG00002075528			2	67	0.716418	0	0	0	0	0	0
ENSMUSG00002076622			5	110	0.3	0	0	0	0	0	0
ENSMUSG00002075894			12	119	0.151261	0	0	0	0	0	0
ENSMUSG00002075531			1	121	0.512397	0	0	0	0	0	0
ENSMUSG00002075532			16	88	0.306818	0	0	0	0	0	2
ENSMUSG00002075533			6	73	0.671233	0	0	0	0	0	0
ENSMUSG00002075898			11	117	0.247863	0	0	0	0	0	0
ENSMUSG00002075535			7	125	0.56	0	0	0	0	0	0
ENSMUSG00002075536			7	91	0.505495	0	0	0	0	0	0
ENSMUSG00002075537			4	85	0.858824	0	0	0	0	0	0
ENSMUSG00002075538			14	117	0.273504	0	0	0	0	0	0
ENSMUSG00000118029		TEC	19	2090	0.57177	0	1	1	6	4	0
ENSMUSG00002075904			13	142	0.661972	0	0	0	0	2	0
ENSMUSG00002075541			2	127	0.377953	0	0	0	0	0	0
ENSMUSG00002076635			3	121	0.495868	0	0	0	0	0	0
ENSMUSG00002075907			8	90	0.833333	0	0	0	0	0	0
ENSMUSG00002075544			7	66	0.333333	0	0	0	0	1	0
ENSMUSG00002075545			1	77	0.532468	0	6	0	0	0	0
ENSMUSG00002075546			12	104	0.557692	0	0	0	0	0	0
ENSMUSG00002075547			4	64	0.609375	0	0	0	0	0	0
ENSMUSG00002076641			X	85	0.376471	0	0	0	0	0	0
ENSMUSG00002076642			7	121	0.479339	0	0	0	0	0	0
ENSMUSG00002075914			12	78	0.666667	0	0	0	0	0	0
ENSMUSG00002075551			13	57	0.719298	0	0	1	0	0	0
ENSMUSG00002075552			1	105	0.485714	0	0	0	0	0	0
ENSMUSG00002075553			4	110	0.372727	0	0	0	0	1	0
ENSMUSG00002075554			8	131	0.465649	0	0	0	0	0	0
ENSMUSG00002075555			8	80	0.5125	0	0	0	0	0	0
ENSMUSG00002075556			2	84	0.345238	0	0	0	0	0	0
ENSMUSG00002075436			15	77	0.493506	0	0	0	0	0	0
ENSMUSG00002076651			12	207	0.347826	0	0	0	0	0	0
ENSMUSG00000119928			12	132	0.5	0	0	0	0	0	0
ENSMUSG00002075560			X	86	0.395349	0	0	0	0	0	0
ENSMUSG00000119930			5	123	0.487805	0	0	0	0	0	0
ENSMUSG00002075562			9	127	0.385827	0	0	0	0	0	0
ENSMUSG00002075927			6	112	0.589286	0	0	0	0	0	0
ENSMUSG00002075928			6	114	0.333333	0	0	0	0	0	0
ENSMUSG00002075565			4	102	0.5	0	0	0	0	0	0
ENSMUSG00002075566			9	82	0.47561	0	0	0	0	0	0
ENSMUSG00002075931			11	216	0.527778	0	0	0	0	0	0
ENSMUSG00002076661			1	84	0.47619	0	0	0	0	0	0
ENSMUSG00000119398			17	88	0.443182	0	0	0	0	0	0
ENSMUSG00002076663			17	126	0.571429	0	0	0	0	0	0
ENSMUSG00002075571			16	110	0.618182	0	0	0	0	0	0
ENSMUSG00002076665			15	173	0.624277	0	0	0	0	0	0
ENSMUSG00002075573			12	86	0.546512	0	0	0	0	0	0
ENSMUSG00002076666			11	138	0.586957	0	0	0	0	0	0
ENSMUSG00002075575			18	110	0.554545	0	0	1	0	0	0
ENSMUSG00002075576			11	101	0.445545	0	0	0	0	0	0
ENSMUSG00002076669			1	154	0.5	0	0	0	0	0	0
ENSMUSG00002075942			8	91	0.307692	0	0	0	0	0	0
ENSMUSG00002075579			11	66	0.30303	0	0	0	0	0	0
ENSMUSG00002075580			6	143	0.447552	0	0	0	0	0	0
ENSMUSG00002075581			3	106	0.396226	0	0	0	0	0	0
ENSMUSG00000119417			19	50	0.42	0	0	0	0	0	0
ENSMUSG00002075583			1	143	0.517483	0	0	0	0	0	0
ENSMUSG00002075584			8	130	0.446154	0	0	0	0	0	0
ENSMUSG00002075949			X	137	0.430657	0	0	0	0	0	0
ENSMUSG00002076679			15	116	0.189655	0	0	0	0	0	0
ENSMUSG00002075951			5	83	0.457831	0	0	0	0	0	0
ENSMUSG00000119432			9	72	0.402778	0	0	0	0	0	0
ENSMUSG00002076682			9	59	0.627119	0	0	0	0	0	0
ENSMUSG00002075590			15	69	0.463768	0	0	0	0	0	0
ENSMUSG00002075591			12	142	0.415493	0	0	0	0	0	0
ENSMUSG00002075592			8	60	0.666667	0	0	0	0	0	0
ENSMUSG00002076686			2	126	0.380952	0	0	0	0	0	0
ENSMUSG00002075958			8	127	0.464567	0	0	0	0	0	0
ENSMUSG00002076808			3	120	0.491667	0	0	0	0	0	0
ENSMUSG00002075596			12	110	0.572727	0	0	0	0	0	0
ENSMUSG00002075597			13	138	0.666667	0	0	0	0	0	0
ENSMUSG00002075598			10	203	0.448276	0	0	0	0	0	0
ENSMUSG00002075599			17	100	0.51	0	0	0	0	0	0
ENSMUSG00002076692			8	110	0.618182	0	0	0	0	0	0
ENSMUSG00002074870			7	96	0.510417	0	0	0	0	0	0
ENSMUSG00002075602			19	87	0.862069	0	0	1	0	0	0
ENSMUSG00002075603			17	117	0.641026	2	0	0	0	0	0
ENSMUSG00002076697			3	138	0.637681	0	0	0	0	0	0
ENSMUSG00002075605			13	129	0.457364	0	0	0	0	0	0
ENSMUSG00002075606			X	64	0.421875	0	0	0	0	0	0
ENSMUSG00002075607			14	256	0.386719	0	0	0	0	0	0
ENSMUSG00002075608			6	95	0.442105	0	0	0	0	0	0
ENSMUSG00002076702			5	74	0.567568	0	0	0	0	0	0
ENSMUSG00002075610			11	71	0.422535	0	0	0	0	0	0
ENSMUSG00002075611			1	93	0.483871	0	0	0	0	0	0
ENSMUSG00002076705			8	109	0.633028	0	0	0	0	0	0
ENSMUSG00000119468			13	132	0.469697	0	0	0	0	0	0
ENSMUSG00000079190			GL456211.1	1473	0.492193	0	0	0	0	0	0
ENSMUSG00000079192			GL456210.1	255	0.466667	0	0	0	0	0	0
ENSMUSG00000118106		TEC	19	2276	0.52065	0	0	0	0	0	0
ENSMUSG00002075617			14	112	0.178571	0	0	0	0	0	0
ENSMUSG00002075618			13	66	0.333333	0	0	0	0	0	0
ENSMUSG00002075983			12	70	0.7	0	0	0	0	0	0
ENSMUSG00002075984			19	121	0.495868	0	2	0	0	0	0
ENSMUSG00002075621			12	87	0.551724	0	0	0	0	0	0
ENSMUSG00002075622			9	107	0.672897	0	0	0	0	0	0
ENSMUSG00002075623			19	109	0.577982	0	0	0	0	0	0
ENSMUSG00000119486			2	132	0.44697	0	0	0	0	0	0
ENSMUSG00002075625			6	70	0.7	0	0	0	0	0	0
ENSMUSG00002075626			7	107	0.663551	0	0	0	0	0	0
ENSMUSG00002075627			17	116	0.275862	0	0	0	0	0	0
ENSMUSG00002075628			1	85	0.2	0	0	0	0	0	0
ENSMUSG00002075993			13	107	0.672897	0	0	0	0	0	0
ENSMUSG00002075994			19	107	0.654206	0	0	0	0	0	0
ENSMUSG00002075631			2	126	0.380952	0	0	0	0	0	0
ENSMUSG00002075996			7	84	0.488095	0	0	0	0	0	0
ENSMUSG00002076726			13	109	0.59633	0	0	0	0	0	0
ENSMUSG00002076483			5	101	0.50495	0	0	0	0	0	0
ENSMUSG00002075756			9	97	0.453608	0	0	0	0	0	0
ENSMUSG00002076729			X	86	0.395349	0	0	0	0	0	0
ENSMUSG00002076730			17	223	0.632287	0	4	0	0	0	0
ENSMUSG00002076731			2	79	0.506329	3	0	3	4	4	0
ENSMUSG00002075639			X	97	0.639175	0	0	0	0	0	0
ENSMUSG00000118969			6	132	0.469697	0	0	0	0	0	0
ENSMUSG00002075641			7	110	0.590909	0	0	0	0	0	0
ENSMUSG00002075763			13	101	0.49505	0	0	0	0	0	0
ENSMUSG00002076128			15	95	0.242105	0	0	0	0	0	0
ENSMUSG00002076372			15	52	0.596154	0	0	0	0	0	0
ENSMUSG00000095672			GL456211.1	366	0.486339	0	0	0	0	0	0
ENSMUSG00002076010			X	93	0.537634	0	0	0	0	0	0
ENSMUSG00002075647			2	96	0.53125	1	0	0	0	0	0
ENSMUSG00002076012			6	90	0.388889	0	0	0	0	0	0
ENSMUSG00002076377			7	109	0.651376	0	0	0	0	0	0
ENSMUSG00002075650			1	112	0.151786	0	0	0	0	0	0
ENSMUSG00002076743			2	125	0.576	0	0	0	0	0	0
ENSMUSG00002075652			17	121	0.495868	0	0	0	0	0	0
ENSMUSG00002075653			6	121	0.479339	0	0	0	0	0	0
ENSMUSG00002076382			16	73	0.547945	8	0	6	0	6	0
ENSMUSG00002076383			9	86	0.604651	0	0	0	0	0	0
ENSMUSG00000119532			X	143	0.482517	0	0	0	0	0	0
ENSMUSG00002076021			6	233	0.313305	0	0	0	0	0	0
ENSMUSG00000113373		novel protein	5	138	0.478261	0	0	0	0	0	0
ENSMUSG00002076752			1	112	0.598214	0	0	0	0	0	0
ENSMUSG00002075660			12	70	0.657143	0	0	0	0	0	0
ENSMUSG00002075661			4	65	0.876923	0	0	0	0	0	0
ENSMUSG00002075662			6	177	0.40678	1	2	0	0	1	1
ENSMUSG00002076027			X	110	0.454545	0	0	0	0	0	0
ENSMUSG00002075664			5	160	0.6875	0	0	0	0	0	0
ENSMUSG00002075665			6	146	0.486301	0	0	0	0	0	0
ENSMUSG00002075787			18	113	0.60177	0	0	0	0	0	0
ENSMUSG00002075667			9	84	0.416667	0	0	0	0	0	0
ENSMUSG00002075668			2	121	0.421488	0	0	0	0	0	0
ENSMUSG00002076762			10	122	0.52459	0	0	0	0	0	0
ENSMUSG00002075670			16	108	0.657407	0	0	0	0	0	0
ENSMUSG00002076399			2	260	0.334615	0	0	0	0	0	0
ENSMUSG00002075672			16	124	0.516129	8	0	0	0	3	0
ENSMUSG00002076765			2	94	0.255319	0	0	0	0	0	0
ENSMUSG00002076767			X	80	0.55	0	0	0	0	0	0
ENSMUSG00002075675			13	138	0.666667	0	0	0	7	0	0
ENSMUSG00002075676			12	80	0.575	0	0	0	0	0	0
ENSMUSG00002076041			X	106	0.650943	0	0	0	0	0	0
ENSMUSG00002076406			19	106	0.424528	0	0	0	0	2	0
ENSMUSG00002075679			6	93	0.903226	1	2	6	0	5	0
ENSMUSG00002075680			11	109	0.633028	0	0	0	0	0	0
ENSMUSG00002076409			14	113	0.39823	0	0	0	0	0	0
ENSMUSG00002076410			12	65	0.338462	0	0	0	0	0	0
ENSMUSG00002076411			6	102	0.5	0	0	0	0	0	0
ENSMUSG00002075684			10	83	0.39759	0	0	0	0	0	0
ENSMUSG00002075685			11	147	0.353741	0	0	0	0	0	0
ENSMUSG00002076778			2	129	0.426357	0	0	0	0	0	0
ENSMUSG00000119577			8	144	0.527778	0	0	0	4	5	0
ENSMUSG00002076416			2	83	0.313253	0	0	0	0	0	0
ENSMUSG00002076295			10	83	0.662651	0	5	0	0	1	0
ENSMUSG00002075690			12	61	0.540984	0	0	0	0	0	0
ENSMUSG00000096236			JH584297.1	1221	0.481572	0	0	0	0	0	0
ENSMUSG00002075692			4	66	0.333333	0	0	0	0	0	0
ENSMUSG00002075329			15	124	0.403226	0	0	0	0	0	0
ENSMUSG00002075694			8	110	0.581818	0	0	0	0	0	0
ENSMUSG00002076423			X	121	0.61157	0	0	0	0	0	0
ENSMUSG00002075696			4	120	0.566667	0	0	0	0	0	0
ENSMUSG00002076790			9	104	0.596154	0	0	0	0	0	0
ENSMUSG00002076791			1	78	0.576923	0	0	0	0	0	0
ENSMUSG00000095570			GL456354.1	1443	0.471933	0	0	0	0	0	0
ENSMUSG00002075700			X	121	0.495868	0	0	0	0	0	0
ENSMUSG00002076065			5	70	0.314286	0	0	0	0	0	0
ENSMUSG00002076795			8	199	0.341709	0	0	0	0	0	0
ENSMUSG00002075703			8	101	0.49505	0	0	0	0	0	0
ENSMUSG00002075704			14	107	0.242991	0	0	0	0	0	0
ENSMUSG00002076798			19	116	0.413793	0	0	0	0	0	0
ENSMUSG00002076070			9	110	0.627273	0	0	0	0	0	0
ENSMUSG00002076800			2	110	0.618182	0	0	0	0	0	0
ENSMUSG00002075708			14	80	0.575	0	0	0	0	0	0
ENSMUSG00002075709			5	135	0.659259	0	0	0	0	0	0
ENSMUSG00002075710			2	77	0.454545	8	17	4	2	6	7
ENSMUSG00002075711			13	138	0.666667	0	0	0	0	0	0
ENSMUSG00002075712			5	101	0.50495	0	0	0	0	0	0
ENSMUSG00002075713			8	114	0.640351	0	0	1	0	0	0
ENSMUSG00002075714			13	124	0.564516	0	0	0	0	0	0
ENSMUSG00002076079			19	109	0.458716	0	0	0	0	0	0
ENSMUSG00002075837			Y	99	0.333333	0	0	0	0	0	0
ENSMUSG00002076445			13	141	0.673759	2	4	0	0	0	0
ENSMUSG00002076811			4	125	0.464	0	0	0	0	0	0
ENSMUSG00002075719			10	85	0.505882	0	0	0	0	0	0
ENSMUSG00002076813			1	100	0.49	0	0	0	0	0	0
ENSMUSG00002075721			X	107	0.663551	0	0	0	0	0	0
ENSMUSG00000117102		Novel transcript	17	3039	0.455742	0	0	0	0	0	0
ENSMUSG00002075723			4	90	0.4	0	0	0	0	0	0
ENSMUSG00002075724			1	121	0.495868	0	0	0	0	0	0
ENSMUSG00002075725			7	110	0.572727	0	0	0	0	0	0
ENSMUSG00002075847			1	121	0.495868	0	0	0	0	0	0
ENSMUSG00000119643			7	90	0.633333	0	0	0	0	0	0
ENSMUSG00002075728			3	91	0.307692	0	0	0	0	0	0
ENSMUSG00002075729			GL456385.1	100	0.5	0	0	0	0	0	0
ENSMUSG00002076094			4	101	0.514851	0	0	0	0	0	0
ENSMUSG00002075731			10	76	0.447368	0	0	0	0	0	0
ENSMUSG00002076825			13	108	0.546296	0	0	0	0	0	0
ENSMUSG00002075733			17	145	0.689655	0	0	0	0	0	0
ENSMUSG00002075855			7	224	0.357143	0	0	0	0	0	0
ENSMUSG00002076828			2	96	0.59375	0	0	0	0	0	0
ENSMUSG00002076464			17	323	0.674923	7	3	5	18	1	7
ENSMUSG00002075737			5	110	0.618182	0	0	3	2	3	0
ENSMUSG00002075738			2	124	0.33871	0	0	0	0	0	0
ENSMUSG00002076832			4	89	0.876404	0	0	0	0	0	0
ENSMUSG00002075740			6	110	0.554545	0	0	0	0	0	0
ENSMUSG00002075741			6	112	0.339286	2	3	0	0	2	2
ENSMUSG00002076835			2	120	0.416667	0	0	0	0	0	0
ENSMUSG00002075743			6	110	0.554545	0	0	0	0	0	0
ENSMUSG00002075744			X	86	0.406977	0	0	0	0	0	0
ENSMUSG00002075866			12	66	0.333333	0	0	0	0	2	0
ENSMUSG00002075746			13	255	0.517647	0	0	0	0	0	0
ENSMUSG00002075747			4	96	0.479167	0	0	0	0	0	0
ENSMUSG00002075748			2	102	0.5	0	0	0	0	0	0
ENSMUSG00002076477			1	116	0.465517	0	0	0	0	0	0
ENSMUSG00002076843			16	70	0.6	0	0	0	0	0	0
ENSMUSG00002075751			3	112	0.696429	0	0	0	0	0	0
ENSMUSG00002076845			14	66	0.318182	0	0	0	0	0	0
ENSMUSG00002075753			15	107	0.691589	0	0	0	0	0	0
ENSMUSG00002076847			11	88	0.363636	0	0	0	0	0	0
ENSMUSG00002076969			4	77	0.467532	0	0	0	0	0	0
ENSMUSG00002075877			13	84	0.47619	0	0	0	0	0	0
ENSMUSG00002076121			7	71	0.690141	0	2	0	0	0	0
ENSMUSG00002075758			X	122	0.606557	0	0	0	0	0	0
ENSMUSG00002075759			14	121	0.495868	0	0	0	0	0	0
ENSMUSG00002075760			11	105	0.695238	0	0	0	0	0	0
ENSMUSG00002075761			6	139	0.532374	18	1	4	5	4	3
ENSMUSG00002076855			2	53	0.679245	0	0	1	0	3	0
ENSMUSG00002076248			11	77	0.545455	0	0	0	0	0	0
ENSMUSG00002076978			18	90	0.433333	3	0	0	0	0	0
ENSMUSG00002075765			9	118	0.525424	7	0	0	0	0	0
ENSMUSG00002076980			2	127	0.393701	0	0	0	0	0	0
ENSMUSG00000118632		component of Sp100-rs (Csprs) pseudogene	1	355	0.433803	0	0	0	0	0	0
ENSMUSG00000119513			8	92	0.347826	0	0	0	0	0	0
ENSMUSG00002075890			11	138	0.652174	2	11	0	6	3	8
ENSMUSG00002075770			4	591	0.563452	0	0	0	0	0	0
ENSMUSG00002075771			8	68	0.426471	0	0	0	0	0	0
ENSMUSG00000119713			9	132	0.454545	0	0	0	0	0	0
ENSMUSG00002075773			15	138	0.557971	0	0	0	0	0	0
ENSMUSG00002075774			18	110	0.563636	0	0	0	0	0	0
ENSMUSG00002075775			6	110	0.627273	0	0	0	0	0	0
ENSMUSG00002076869			2	120	0.4	0	0	0	0	0	0
ENSMUSG00002075777			18	71	0.549296	0	0	0	0	0	0
ENSMUSG00002076871			15	114	0.508772	0	0	0	0	0	0
ENSMUSG00002075779			9	129	0.403101	0	4	0	0	0	0
ENSMUSG00000118646			10	383	0.584856	0	0	0	0	0	0
ENSMUSG00002075781			6	125	0.576	0	0	0	0	0	0
ENSMUSG00002076875			10	126	0.507937	0	0	0	0	0	0
ENSMUSG00002076876			4	126	0.579365	0	0	0	0	0	0
ENSMUSG00002076148			11	126	0.396825	0	0	0	0	0	0
ENSMUSG00002075785			8	121	0.495868	0	0	0	0	0	0
ENSMUSG00002076879			9	67	0.432836	0	0	0	0	0	0
ENSMUSG00002075908			9	126	0.555556	6	0	0	0	0	3
ENSMUSG00002076152			11	70	0.614286	0	0	0	0	0	0
ENSMUSG00000118656		olfactory receptor, family 13, subfamily H, member 1 (OR13H1) pseudogene	X	87	0.413793	0	0	0	0	0	0
ENSMUSG00002075790			10	101	0.465347	0	0	0	0	0	0
ENSMUSG00000118658		SNW domain containing 1 (Snw1) pseudogene	12	166	0.403614	0	0	0	0	0	0
ENSMUSG00002075792			7	110	0.563636	0	0	0	0	0	0
ENSMUSG00002076886			3	86	0.27907	0	0	0	0	0	0
ENSMUSG00002075794			19	110	0.536364	0	0	0	0	0	0
ENSMUSG00000095742			JH584295.1	243	0.703704	1	13	10	16	22	9
ENSMUSG00002076524			16	110	0.627273	0	0	0	0	0	0
ENSMUSG00000110033		olfactory receptor 1527, pseudogene 1	7	939	0.450479	0	0	0	0	0	0
ENSMUSG00002076162			13	138	0.666667	0	1	0	0	0	0
ENSMUSG00002075799			5	99	0.474747	0	0	0	0	0	0
ENSMUSG00002076892			10	101	0.49505	0	0	0	0	0	0
ENSMUSG00002076894			5	137	0.532847	0	0	0	0	0	0
ENSMUSG00000095076			JH584298.1	1215	0.469136	0	0	0	0	0	0
ENSMUSG00002075803			2	92	0.434783	0	0	0	0	0	0
ENSMUSG00002076168			10	110	0.581818	0	0	0	0	0	0
ENSMUSG00002075805			6	110	0.6	0	0	0	0	0	0
ENSMUSG00002076899			X	96	0.510417	0	0	0	0	0	0
ENSMUSG00002075807			10	110	0.609091	0	0	0	0	0	0
ENSMUSG00002075808			9	141	0.680851	0	5	4	0	0	0
ENSMUSG00002076537			18	166	0.355422	0	0	0	0	0	0
ENSMUSG00002076901			X	102	0.5	0	0	0	0	0	0
ENSMUSG00002076904			2	126	0.587302	0	0	0	0	0	0
ENSMUSG00002075812			2	100	0.44	0	0	0	0	0	0
ENSMUSG00002075813			19	124	0.16129	0	0	0	0	0	0
ENSMUSG00002075814			13	108	0.564815	0	0	0	0	0	0
ENSMUSG00002076907			13	138	0.666667	0	0	0	0	0	0
ENSMUSG00002076544			1	101	0.49505	0	0	0	0	0	0
ENSMUSG00002075817			4	125	0.592	0	0	0	0	0	0
ENSMUSG00002075818			X	134	0.365672	0	0	0	0	0	0
ENSMUSG00002075819			1	100	0.51	0	0	0	0	0	0
ENSMUSG00002075820			3	74	0.567568	0	0	0	0	0	0
ENSMUSG00002076185			3	101	0.49505	0	0	0	0	0	0
ENSMUSG00002075822			6	78	0.512821	4	0	0	0	0	0
ENSMUSG00002076916			10	133	0.646617	0	0	0	0	0	0
ENSMUSG00002076917			2	100	0.38	0	0	0	0	0	0
ENSMUSG00000118703			6	132	0.469697	0	0	0	0	0	0
ENSMUSG00002076919			10	94	0.595745	0	0	0	0	0	0
ENSMUSG00002075463			2	87	0.482759	16	38	21	12	19	5
ENSMUSG00002075828			8	109	0.559633	0	0	0	0	0	0
ENSMUSG00002076922			5	97	0.628866	0	0	0	0	0	0
ENSMUSG00000119612			12	132	0.507576	0	0	0	0	0	0
ENSMUSG00002075831			X	104	0.375	0	0	0	0	0	0
ENSMUSG00002076925			15	101	0.49505	0	0	0	0	0	0
ENSMUSG00002075833			4	138	0.485507	0	0	0	0	0	0
ENSMUSG00002076926			7	110	0.572727	0	0	0	0	0	0
ENSMUSG00002075835			15	71	0.535211	0	0	0	0	0	0
ENSMUSG00002075836			3	108	0.509259	0	0	0	0	0	0
ENSMUSG00002076443			16	125	0.592	9	0	0	0	0	0
ENSMUSG00000107399		olfactory receptor 1544, pseudogene 1	10	944	0.416314	0	0	0	0	0	0
ENSMUSG00002075839			1	132	0.363636	0	0	0	0	0	0
ENSMUSG00002076568			2	91	0.384615	0	0	0	0	0	0
ENSMUSG00002075841			5	105	0.514286	0	0	0	0	0	0
ENSMUSG00002075842			1	121	0.413223	0	0	0	0	0	0
ENSMUSG00002076936			14	119	0.294118	0	0	0	0	0	0
ENSMUSG00000094474			JH584299.1	1446	0.464039	0	0	0	0	0	0
ENSMUSG00002075845			X	107	0.654206	0	0	0	0	0	0
ENSMUSG00002075846			15	98	0.428571	0	0	0	0	0	0
ENSMUSG00002075968			6	126	0.555556	0	0	0	0	0	0
ENSMUSG00002075848			6	97	0.525773	15	0	1	1	8	0
ENSMUSG00002075849			5	92	0.521739	0	0	0	0	0	0
ENSMUSG00002075850			Y	110	0.618182	0	0	0	0	0	0
ENSMUSG00002075851			19	89	0.831461	0	0	1	1	0	0
ENSMUSG00002076945			17	272	0.584559	5	0	0	0	2	0
ENSMUSG00002076946			10	68	0.338235	0	0	0	0	0	0
ENSMUSG00002075854			16	110	0.290909	0	0	0	0	0	0
ENSMUSG00002075976			7	80	0.475	0	0	0	0	4	0
ENSMUSG00002075856			3	121	0.495868	0	0	0	0	0	0
ENSMUSG00002075857			8	202	0.529703	0	0	0	0	0	0
ENSMUSG00002076222			18	94	0.265957	0	0	0	0	0	0
ENSMUSG00000118748			11	132	0.515152	0	0	0	0	0	0
ENSMUSG00002075860			7	69	0.478261	0	0	0	0	0	0
ENSMUSG00002075861			11	67	0.641791	0	0	0	0	0	0
ENSMUSG00002075862			7	110	0.627273	0	0	0	0	0	0
ENSMUSG00002076712			6	147	0.578231	0	0	0	0	0	0
ENSMUSG00000096100			GL456211.1	372	0.497312	0	0	0	0	0	0
ENSMUSG00002075865			2	125	0.576	2	0	2	0	0	0
ENSMUSG00002074892			12	97	0.639175	0	0	0	0	0	0
ENSMUSG00002075867			2	76	0.434211	0	0	0	0	0	0
ENSMUSG00002074894			11	126	0.555556	0	0	0	0	0	0
ENSMUSG00002076962			1	84	0.488095	0	0	0	0	0	0
ENSMUSG00000115801		novel transcript	14	93147	0.408183	1	1	0	0	2	1
ENSMUSG00000118364		TEC	19	1757	0.480364	0	0	0	0	0	0
ENSMUSG00002075872			3	84	0.380952	0	0	0	0	0	3
ENSMUSG00002076966			X	127	0.409449	0	0	0	0	0	0
ENSMUSG00002076238			15	80	0.575	0	0	0	0	0	0
ENSMUSG00002076968			11	112	0.589286	0	0	0	0	0	0
ENSMUSG00002076361			9	97	0.412371	0	0	0	0	0	0
ENSMUSG00000118957			X	114	0.429825	0	0	0	0	0	0
ENSMUSG00002075878			2	124	0.290323	0	0	0	0	0	0
ENSMUSG00002076972			X	86	0.383721	0	0	0	0	0	0
ENSMUSG00002075880			10	67	0.402985	0	0	0	0	0	0
ENSMUSG00002075881			4	126	0.571429	0	0	0	0	0	0
ENSMUSG00002075882			12	76	0.657895	0	0	0	0	0	0
ENSMUSG00002076976			15	91	0.494505	0	0	0	0	0	0
ENSMUSG00002076005			5	68	0.764706	0	0	0	0	0	0
ENSMUSG00002076127			2	122	0.295082	0	0	0	0	0	0
ENSMUSG00002075886			6	147	0.312925	0	0	0	0	0	0
ENSMUSG00002076857			1	100	0.27	0	0	0	0	0	0
ENSMUSG00002075888			2	189	0.677249	0	0	0	0	0	0
ENSMUSG00002076859			15	101	0.49505	4	4	0	0	0	0
ENSMUSG00002076375			16	163	0.429448	0	0	0	0	0	0
ENSMUSG00002075891			19	77	0.506494	0	0	0	0	0	0
ENSMUSG00002076985			7	121	0.479339	0	0	0	0	0	0
ENSMUSG00002075893			18	121	0.495868	0	0	0	0	0	0
ENSMUSG00002076986			15	127	0.354331	0	0	0	0	0	0
ENSMUSG00002075895			16	89	0.865169	0	0	0	0	0	0
ENSMUSG00002075896			3	103	0.883495	0	0	0	0	0	0
ENSMUSG00002075897			7	102	0.558824	0	0	0	0	0	0
ENSMUSG00002076626			19	86	0.290698	0	0	0	0	0	0
ENSMUSG00002075899			19	82	0.695122	0	0	0	0	0	0
ENSMUSG00002075900			18	121	0.404959	0	0	0	0	0	0
ENSMUSG00002075901			7	110	0.627273	0	0	0	0	0	0
ENSMUSG00002075902			10	125	0.608	0	0	0	0	0	0
ENSMUSG00000111339		post-GPI attachment to proteins 2	7	606	0.542904	0	0	0	0	0	0
ENSMUSG00000118820			6	132	0.469697	0	0	0	0	0	0
ENSMUSG00002075905			12	137	0.49635	0	0	0	0	0	0
ENSMUSG00002075906			8	86	0.918605	0	0	0	0	0	0
ENSMUSG00000119358			2	136	0.441176	0	0	0	0	0	0
ENSMUSG00000119011			11	144	0.506944	4	4	0	2	1	1
ENSMUSG00002076273			14	105	0.761905	0	0	0	0	0	0
ENSMUSG00002075910			6	194	0.556701	0	0	0	0	0	0
ENSMUSG00002076639			4	110	0.627273	0	0	0	0	0	0
ENSMUSG00002076397			6	120	0.391667	1	0	0	0	1	3
ENSMUSG00002075913			4	83	0.518072	0	0	0	0	0	0
ENSMUSG00002076278			X	92	0.380435	0	0	0	0	0	0
ENSMUSG00002075915			12	109	0.568807	0	0	0	0	0	0
ENSMUSG00002075916			5	81	0.37037	0	0	0	0	0	0
ENSMUSG00002075917			4	91	0.472527	0	0	0	0	0	0
ENSMUSG00002076646			11	75	0.453333	0	0	0	0	0	0
ENSMUSG00002076283			17	98	0.244898	0	0	0	0	0	0
ENSMUSG00002075920			4	127	0.535433	0	0	0	0	0	0
ENSMUSG00002075193			10	107	0.663551	0	0	0	0	0	0
ENSMUSG00002075922			1	129	0.488372	0	0	0	0	0	0
ENSMUSG00002075557			12	162	0.524691	0	0	0	0	0	0
ENSMUSG00002076652			6	177	0.542373	0	0	0	0	0	0
ENSMUSG00002076289			14	96	0.229167	0	0	0	0	0	0
ENSMUSG00002075926			8	55	0.472727	0	0	0	0	0	0
ENSMUSG00002076655			13	109	0.495413	0	0	0	0	0	0
ENSMUSG00002076292			18	134	0.529851	0	0	0	0	0	0
ENSMUSG00002075929			2	78	0.525641	0	0	0	0	0	0
ENSMUSG00002076294			9	126	0.579365	0	0	0	0	0	0
ENSMUSG00002076658			5	80	0.75	0	0	0	0	0	0
ENSMUSG00002075932			9	108	0.0925926	0	0	0	0	0	0
ENSMUSG00002075933			14	95	0.442105	0	0	0	0	0	0
ENSMUSG00000119763			X	114	0.429825	0	0	0	0	0	0
ENSMUSG00002075935			5	121	0.198347	0	0	0	0	0	0
ENSMUSG00002075936			14	79	0.379747	0	0	0	0	0	0
ENSMUSG00002076301			5	74	0.22973	0	0	0	0	0	0
ENSMUSG00000119588			6	132	0.469697	0	0	0	0	0	0
ENSMUSG00002075939			15	101	0.485149	0	0	0	0	0	0
ENSMUSG00002075940			9	84	0.5	0	0	0	0	0	0
ENSMUSG00001118671			8	92	0.380435	0	0	0	0	0	0
ENSMUSG00002076306			5	95	0.315789	0	0	0	0	0	0
ENSMUSG00002074848			18	96	0.416667	0	0	0	0	0	0
ENSMUSG00002076308			9	107	0.327103	0	0	0	0	0	0
ENSMUSG00002074850			5	117	0.649573	0	0	0	0	0	0
ENSMUSG00002074851			1	53	0.679245	0	0	0	0	0	0
ENSMUSG00002074852			2	167	0.371257	0	0	0	0	0	0
ENSMUSG00002075948			10	263	0.311787	8	2	7	0	4	0
ENSMUSG00002076677			13	114	0.473684	0	0	0	0	0	0
ENSMUSG00002075950			1	77	0.363636	0	0	0	0	0	0
ENSMUSG00002076557			3	106	0.556604	0	0	0	0	0	0
ENSMUSG00002075952			4	96	0.489583	0	0	0	0	0	0
ENSMUSG00002075953			11	69	0.550725	0	0	0	0	0	0
ENSMUSG00002075954			4	95	0.389474	0	0	0	0	0	0
ENSMUSG00002074860			7	121	0.495868	0	0	0	0	0	0
ENSMUSG00002075956			8	75	0.44	0	0	0	0	0	0
ENSMUSG00000118901			12	132	0.484848	0	0	0	0	0	0
ENSMUSG00002074861			5	126	0.626984	0	0	0	0	0	0
ENSMUSG00002076807			2	83	0.373494	0	1	0	0	0	0
ENSMUSG00002075960			2	127	0.433071	0	0	0	0	0	0
ENSMUSG00002074866			7	105	0.542857	0	0	0	0	0	0
ENSMUSG00002076326			11	115	0.6	0	0	0	0	0	0
ENSMUSG00002075963			6	143	0.552448	0	0	0	1	0	0
ENSMUSG00002074868			2	102	0.5	0	0	2	0	1	0
ENSMUSG00002076329			13	144	0.659722	0	0	1	0	0	0
ENSMUSG00000096756			JH584297.1	1446	0.466113	0	0	0	0	0	0
ENSMUSG00002075967			1	110	0.327273	0	0	0	0	0	0
ENSMUSG00002076453			15	60	0.633333	0	0	0	0	0	0
ENSMUSG00002074874			2	67	0.313433	0	0	0	0	0	0
ENSMUSG00002075970			17	81	0.530864	0	0	0	0	0	0
ENSMUSG00002075971			18	84	0.547619	0	0	0	0	0	0
ENSMUSG00002076336			5	111	0.585586	1	0	0	0	0	0
ENSMUSG00002075973			11	80	0.55	0	0	0	0	0	0
ENSMUSG00002074879			11	115	0.313043	0	0	1	0	0	0
ENSMUSG00000119464			8	92	0.380435	0	0	0	0	0	0
ENSMUSG00002076097			2	121	0.471074	0	0	0	0	0	0
ENSMUSG00002075977			X	94	0.542553	0	0	0	0	0	0
ENSMUSG00002075978			15	129	0.534884	0	0	0	0	0	0
ENSMUSG00002075979			7	110	0.609091	0	0	0	0	0	0
ENSMUSG00002075980			1	141	0.64539	0	0	0	0	0	0
ENSMUSG00002075981			16	126	0.603175	0	0	0	0	0	0
ENSMUSG00002075982			8	101	0.267327	0	0	0	0	0	0
ENSMUSG00002076711			17	96	0.677083	2	0	0	0	0	0
ENSMUSG00002076105			1	125	0.576	0	0	0	0	0	0
ENSMUSG00002076470			16	133	0.503759	0	0	0	0	0	0
ENSMUSG00002075986			X	128	0.671875	0	0	0	0	0	0
ENSMUSG00000090395			12	278	0.503597	0	0	0	0	0	0
ENSMUSG00002074893			7	110	0.572727	0	0	0	0	0	0
ENSMUSG00002076110			3	66	0.363636	0	0	0	0	0	0
ENSMUSG00002075990			2	143	0.594406	0	0	0	0	0	0
ENSMUSG00002075991			19	132	0.333333	0	0	0	0	0	0
ENSMUSG00002075992			1	110	0.554545	0	0	0	0	0	0
ENSMUSG00002076357			8	110	0.627273	0	0	0	0	0	0
ENSMUSG00002074898			6	230	0.430435	0	0	0	0	0	0
ENSMUSG00002076359			18	128	0.421875	0	0	0	0	0	0
ENSMUSG00002076724			2	120	0.425	0	0	0	0	1	0
ENSMUSG00002076118			6	97	0.391753	0	0	0	0	0	0
ENSMUSG00000119857			14	132	0.424242	0	0	0	0	0	0
ENSMUSG00002076120			X	110	0.6	0	0	0	0	0	0
ENSMUSG00002076849			2	121	0.396694	0	0	0	0	0	0
ENSMUSG00002076001			12	112	0.294643	0	0	0	0	0	0
ENSMUSG00002076123			3	128	0.453125	0	0	0	0	0	0
ENSMUSG00002076003			9	153	0.163399	0	0	0	0	0	0
ENSMUSG00000095666			JH584296.1	1446	0.465422	0	0	0	0	0	0
ENSMUSG00002076126			13	70	0.442857	0	0	0	0	0	0
ENSMUSG00002076490			10	72	0.333333	0	0	0	0	0	0
ENSMUSG00002076492			15	54	0.666667	0	0	0	0	0	0
ENSMUSG00002076250			12	139	0.460432	0	0	0	0	0	0
ENSMUSG00002076251			15	60	0.633333	0	0	0	0	0	0
ENSMUSG00000119329			X	143	0.475524	0	0	0	0	0	0
ENSMUSG00000119872			3	132	0.492424	0	0	0	0	0	0
ENSMUSG00002076740			9	79	0.493671	0	0	0	0	0	0
ENSMUSG00002076659			X	106	0.669811	0	0	0	0	0	0
ENSMUSG00002076014			2	79	0.468354	0	0	0	0	0	0
ENSMUSG00002076621			3	100	0.28	0	3	0	0	0	0
ENSMUSG00002076016			9	90	0.366667	0	0	0	0	0	0
ENSMUSG00002076017			6	110	0.554545	0	4	0	0	0	0
ENSMUSG00000119525			2	136	0.455882	0	0	0	0	0	0
ENSMUSG00002076140			2	114	0.421053	0	0	0	0	0	0
ENSMUSG00000095500			GL456221.1	291	0.450172	0	0	0	0	0	0
ENSMUSG00002076385			16	84	0.5	0	0	0	0	0	0
ENSMUSG00002076386			3	92	0.413043	0	0	0	0	0	0
ENSMUSG00002076023			6	101	0.49505	0	0	0	0	0	0
ENSMUSG00002076024			11	118	0.491525	5	0	1	3	0	0
ENSMUSG00002076389			17	74	0.554054	7	0	0	0	3	1
ENSMUSG00002076390			7	121	0.495868	0	0	0	0	0	0
ENSMUSG00002076755			6	110	0.509091	0	0	0	0	0	0
ENSMUSG00002076028			8	112	0.142857	0	0	0	0	0	0
ENSMUSG00002076150			7	96	0.4375	0	0	0	0	0	0
ENSMUSG00000118653		ubiquitin-conjugating enzyme E2S (Ube2s) retrogene	9	988	0.574899	2	7	16	25	10	9
ENSMUSG00000118528		novel protein	10	129	0.612403	0	0	0	0	0	0
ENSMUSG00002076517			4	115	0.626087	0	0	0	0	0	0
ENSMUSG00000118657		keratin associated protein 10 like (KRTAP10) pseudogene	4	118	0.59322	0	0	0	0	0	0
ENSMUSG00002076034			17	67	0.656716	0	0	0	0	0	0
ENSMUSG00002076763			19	122	0.557377	0	0	0	0	0	0
ENSMUSG00000118660		novel pseudogene, ortholog of ZNF660	9	990	0.457576	0	0	0	0	0	0
ENSMUSG00000118661		mucin 6, gastric [Source:NCBI gene (formerly Entrezgene);Acc:353328]	7	15593	0.529661	0	0	3	0	0	1
ENSMUSG00002076523			7	121	0.479339	0	0	0	0	0	0
ENSMUSG00002076281			2	170	0.441176	0	0	0	0	0	0
ENSMUSG00002076040			5	132	0.469697	0	0	0	0	0	0
ENSMUSG00002076405			13	249	0.48996	0	0	0	0	0	0
ENSMUSG00002076890			GL456381.1	99	0.505051	0	0	0	0	0	0
ENSMUSG00002076649			15	126	0.309524	0	0	5	0	0	0
ENSMUSG00002076408			15	60	0.616667	0	0	0	0	0	0
ENSMUSG00000119569			X	114	0.403509	0	0	0	0	0	0
ENSMUSG00000094383			JH584299.1	1482	0.469636	0	0	0	0	0	0
ENSMUSG00002076896			11	193	0.544041	0	0	0	0	0	0
ENSMUSG00002076776			6	378	0.5	0	0	0	0	0	0
ENSMUSG00002076049			8	133	0.43609	0	0	0	0	0	0
ENSMUSG00000119932			X	114	0.403509	0	0	0	0	0	0
ENSMUSG00002076172			2	123	0.333333	0	0	0	0	0	0
ENSMUSG00002076900			6	83	0.493976	0	0	0	0	0	0
ENSMUSG00002076093			4	110	0.627273	0	0	0	0	0	0
ENSMUSG00002076054			X	71	0.394366	0	3	0	1	0	0
ENSMUSG00002076297			2	122	0.532787	0	0	0	0	0	0
ENSMUSG00000096244		vomeronasal 1 receptor Vmn1r187 [Source:NCBI gene (formerly Entrezgene);Acc:100039499]	GL456219.1	903	0.433001	0	0	0	0	0	0
ENSMUSG00002076785			2	125	0.576	0	0	0	0	0	0
ENSMUSG00000118555		novel zinc finger pseudogene	7	1816	0.35793	0	3	0	0	1	0
ENSMUSG00002076422			2	124	0.33871	0	0	0	0	0	0
ENSMUSG00002076545			10	193	0.466321	0	0	0	0	0	0
ENSMUSG00002076425			19	109	0.587156	0	0	0	0	0	0
ENSMUSG00002076062			2	95	0.305263	0	0	0	0	0	0
ENSMUSG00002076427			11	173	0.618497	0	0	0	0	0	0
ENSMUSG00002076064			2	95	0.347368	0	0	0	0	0	0
ENSMUSG00002076429			5	96	0.489583	0	0	0	0	0	0
ENSMUSG00000094874			GL456221.1	366	0.483607	0	0	0	0	0	0
ENSMUSG00002076067			8	110	0.609091	0	0	0	0	1	0
ENSMUSG00002076432			8	121	0.479339	0	0	2	0	2	0
ENSMUSG00002076433			14	103	0.417476	0	0	0	0	0	0
ENSMUSG00002076434			16	72	0.569444	0	0	0	0	0	0
ENSMUSG00002076071			9	84	0.261905	0	0	0	0	0	0
ENSMUSG00002076556			11	236	0.504237	0	0	0	0	0	0
ENSMUSG00002076437			2	125	0.584	0	2	1	0	0	0
ENSMUSG00002076074			2	201	0.422886	0	0	0	0	0	0
ENSMUSG00000094887			JH584299.1	2515	0.415507	0	0	0	0	0	0
ENSMUSG00002076197			18	156	0.570513	0	0	0	0	0	0
ENSMUSG00002076441			4	101	0.514851	0	0	0	0	0	0
ENSMUSG00002076806			15	60	0.65	0	0	0	0	0	0
ENSMUSG00000119619			2	136	0.441176	0	0	0	0	0	0
ENSMUSG00002076241			3	110	0.618182	0	0	0	0	0	0
ENSMUSG00002076929			X	169	0.502959	0	0	0	0	0	0
ENSMUSG00002076446			10	93	0.344086	0	0	0	0	0	0
ENSMUSG00002076932			2	68	0.808824	0	0	0	0	0	0
ENSMUSG00000119090			9	132	0.507576	0	0	0	0	0	0
ENSMUSG00000119635			12	132	0.454545	0	0	0	0	0	0
ENSMUSG00002076086			6	186	0.333333	7	2	0	0	3	0
ENSMUSG00000118588		serine (or cysteine) peptidase inhibitor, clade A, member 3G (Serpina3g) pseudogene	12	1170	0.498291	0	0	0	0	0	0
ENSMUSG00002076816			17	135	0.540741	0	0	0	0	0	0
ENSMUSG00002076938			9	115	0.53913	0	0	0	0	0	0
ENSMUSG00002076939			1	176	0.539773	0	0	0	0	0	0
ENSMUSG00000119274			16	132	0.431818	0	0	0	0	0	0
ENSMUSG00002076092			12	85	0.529412	0	0	0	0	0	0
ENSMUSG00002076982			10	108	0.490741	0	0	0	0	0	0
ENSMUSG00002076458			9	76	0.473684	0	0	0	0	0	0
ENSMUSG00002076459			12	115	0.391304	0	0	0	0	0	0
ENSMUSG00000118597		solute carrier organic anion transporter family, member 1b2 (Slco1b2) pseudogene	6	476	0.357143	0	0	0	0	0	0
ENSMUSG00002076218			1	216	0.509259	0	0	0	0	0	0
ENSMUSG00002076947			13	109	0.59633	0	0	0	0	0	0
ENSMUSG00002076099			2	104	0.394231	0	0	0	0	0	0
ENSMUSG00000118600		novel protein	2	99	0.444444	0	0	0	0	0	0
ENSMUSG00002076101			15	111	0.558559	0	0	0	0	0	0
ENSMUSG00002076466			5	74	0.554054	0	0	0	0	0	0
ENSMUSG00002076103			X	91	0.406593	0	0	0	0	0	0
ENSMUSG00000118753			2	132	0.477273	0	0	0	0	0	0
ENSMUSG00002076590			9	104	0.509615	0	0	0	0	0	0
ENSMUSG00002074888			12	72	0.541667	0	0	0	0	0	0
ENSMUSG00002076471			9	130	0.523077	0	0	0	0	0	0
ENSMUSG00002076593			19	79	0.544304	0	0	0	0	0	0
ENSMUSG00002076958			12	65	0.446154	0	0	0	0	0	0
ENSMUSG00000094514			GL456211.1	366	0.415301	0	0	0	0	0	0
ENSMUSG00002076475			1	80	0.575	0	0	0	0	0	0
ENSMUSG00002076112			5	127	0.496063	0	0	0	0	0	0
ENSMUSG00000119487			6	132	0.469697	0	0	0	0	0	0
ENSMUSG00002076114			X	111	0.135135	0	0	0	0	0	0
ENSMUSG00000119133			11	134	0.514925	0	0	0	0	0	0
ENSMUSG00002076116			2	102	0.372549	0	0	0	0	0	0
ENSMUSG00002076481			10	132	0.462121	0	0	0	0	0	0
ENSMUSG00000119855			8	92	0.369565	0	0	0	0	0	0
ENSMUSG00002076846			9	110	0.627273	0	0	0	0	0	0
ENSMUSG00002076887			2	121	0.413223	0	0	0	0	0	0
ENSMUSG00002076606			10	126	0.436508	0	0	0	0	0	0
ENSMUSG00002076243			10	95	0.547368	3	9	3	6	0	3
ENSMUSG00002076244			14	137	0.518248	0	0	0	0	0	0
ENSMUSG00002076124			8	84	0.5	0	0	0	0	0	0
ENSMUSG00002075153			4	82	0.573171	0	0	6	0	2	0
ENSMUSG00000118786			6	132	0.515152	0	0	0	0	0	0
ENSMUSG00002076975			14	124	0.475806	0	0	0	0	0	0
ENSMUSG00002076613			6	105	0.47619	0	0	0	0	0	0
ENSMUSG00002076856			11	104	0.788462	0	0	0	0	0	0
ENSMUSG00000095250			GL456211.1	366	0.480874	0	0	0	0	0	0
ENSMUSG00002076777			6	89	0.831461	0	0	0	0	0	0
ENSMUSG00000119391			3	131	0.465649	0	0	0	0	0	0
ENSMUSG00002076577			2	127	0.393701	0	0	0	0	0	0
ENSMUSG00002076578			4	68	0.602941	0	9	0	8	0	0
ENSMUSG00002076863			10	115	0.452174	0	0	0	0	0	0
ENSMUSG00002076984			11	101	0.465347	0	0	0	0	0	0
ENSMUSG00002076177			3	121	0.495868	0	0	0	0	0	0
ENSMUSG00002076138			13	89	0.550562	0	0	0	0	0	0
ENSMUSG00002076139			8	122	0.52459	0	2	0	0	0	0
ENSMUSG00002076625			8	108	0.407407	0	0	0	0	0	3
ENSMUSG00000118642			17	714	0.684874	0	2	0	0	0	0
ENSMUSG00002076142			9	111	0.630631	0	0	0	0	0	0
ENSMUSG00002076143			X	66	0.545455	0	0	0	0	0	0
ENSMUSG00002076508			15	182	0.565934	0	0	0	0	0	0
ENSMUSG00002076145			11	89	0.314607	0	0	0	0	0	0
ENSMUSG00000094337			GL456354.1	1446	0.462656	0	0	0	0	0	0
ENSMUSG00000118649		defensin beta 119 (Defb119) pseudogene	2	126	0.47619	0	0	0	0	0	0
ENSMUSG00000119733			5	132	0.545455	0	1	0	2	3	0
ENSMUSG00000095041			JH584304.1	4238	0.52336	1302	2107	1331	1039	1274	693
ENSMUSG00000119901			12	132	0.454545	0	0	0	0	0	0
ENSMUSG00000119548			7	132	0.469697	0	0	0	0	0	0
ENSMUSG00002076516			5	117	0.273504	0	0	0	0	0	0
ENSMUSG00002076638			10	96	0.739583	0	0	0	0	0	0
ENSMUSG00000118654		tudor domain containing 10 (TDRD10) pseudogene	3	87	0.517241	0	0	0	0	0	0
ENSMUSG00000095728			JH584298.1	1218	0.484401	0	0	0	0	0	0
ENSMUSG00002076156			8	101	0.49505	0	0	0	0	0	0
ENSMUSG00000119196			14	132	0.477273	0	0	0	0	0	0
ENSMUSG00002076643			13	107	0.672897	0	0	0	0	0	0
ENSMUSG00002076644			18	110	0.627273	0	0	0	0	0	0
ENSMUSG00000117546		TEC	17	2455	0.472505	4	15	4	10	10	3
ENSMUSG00002076889			11	80	0.575	0	0	0	0	0	0
ENSMUSG00002076526			15	60	0.566667	0	0	0	0	0	0
ENSMUSG00000108639		olfactory receptor 1400, pseudogene 1	12	908	0.387665	0	0	0	0	0	0
ENSMUSG00000118905			5	71	0.492958	8	0	0	0	0	0
ENSMUSG00002076165			3	102	0.5	0	0	0	0	0	0
ENSMUSG00002075921			9	128	0.585938	0	0	0	0	0	0
ENSMUSG00000094836			JH584299.1	1080	0.438889	0	0	0	0	0	0
ENSMUSG00002076572			8	88	0.363636	0	0	0	0	0	0
ENSMUSG00002076169			6	141	0.64539	4	8	14	13	24	22
ENSMUSG00000074720			GL456354.1	486	0.436214	0	0	0	0	0	0
ENSMUSG00002074872			8	89	0.370787	0	0	0	0	0	0
ENSMUSG00000117357		translocase of outer mitochondrial membrane 20 (Tomm20) pseudogene	18	1790	0.42514	0	0	0	0	0	0
ENSMUSG00000119573			12	132	0.454545	0	0	0	0	0	0
ENSMUSG00002076739			2	107	0.654206	0	0	0	0	0	0
ENSMUSG00001074846		IQ motif containing F3 [Source:NCBI gene (formerly Entrezgene);Acc:68265]	9	1149	0.497824	0	0	0	0	0	0
ENSMUSG00000094855			JH584299.1	1446	0.473029	0	0	0	0	0	0
ENSMUSG00002076217			12	68	0.544118	0	0	0	0	0	0
ENSMUSG00000119226			2	132	0.424242	0	0	0	0	0	0
ENSMUSG00002076300			11	121	0.487603	0	0	0	0	0	0
ENSMUSG00002076664			11	84	0.488095	0	0	0	0	0	0
ENSMUSG00000119052			16	133	0.496241	0	0	0	0	0	0
ENSMUSG00002076546			X	83	0.421687	0	0	0	0	1	3
ENSMUSG00002076911			10	76	0.592105	0	0	6	0	0	0
ENSMUSG00000118697			10	132	0.484848	0	0	0	0	0	0
ENSMUSG00002076913			16	110	0.618182	0	0	0	0	0	0
ENSMUSG00002076186			6	361	0.559557	0	0	0	0	0	0
ENSMUSG00002076187			11	85	0.282353	0	0	0	0	0	0
ENSMUSG00000118700			15	132	0.454545	0	0	0	0	0	0
ENSMUSG00000119779			8	132	0.431818	0	0	0	0	0	0
ENSMUSG00002076311			13	170	0.441176	0	4	0	0	1	0
ENSMUSG00002075827			13	98	0.591837	0	0	0	0	0	0
ENSMUSG00002076192			7	110	0.627273	0	0	0	0	0	0
ENSMUSG00000118943			9	132	0.431818	0	0	0	0	0	0
ENSMUSG00000119783			9	144	0.493056	0	0	0	0	0	0
ENSMUSG00000118714			2	132	0.439394	0	0	0	0	0	0
ENSMUSG00002076196			13	138	0.666667	0	0	0	0	3	0
ENSMUSG00002076318			6	256	0.492188	4	3	2	0	2	0
ENSMUSG00000119256			3	132	0.462121	0	0	0	0	0	0
ENSMUSG00002076684			X	98	0.408163	0	0	0	0	0	0
ENSMUSG00002076805			4	127	0.480315	0	2	0	0	0	0
ENSMUSG00000118410		zinc finger protein 75a (ZNF75A) pseudogene	16	786	0.428753	20	11	19	0	36	0
ENSMUSG00000119140			3	105	0.485714	0	0	0	0	0	0
ENSMUSG00002076324			7	80	0.4875	0	0	0	0	0	0
ENSMUSG00002076607			X	121	0.495868	0	0	0	0	0	0
ENSMUSG00002076690			12	71	0.492958	0	0	0	0	0	0
ENSMUSG00002076206			6	187	0.620321	4	0	0	1	9	0
ENSMUSG00002076571			13	101	0.247525	0	0	0	0	0	0
ENSMUSG00000118624		discs, large homolog 5 (Drosophila) (Dlg5) pseudogene	14	300	0.476667	0	0	0	0	0	0
ENSMUSG00002076937			3	127	0.511811	0	0	0	0	0	0
ENSMUSG00002076331			16	121	0.479339	0	0	0	0	0	0
ENSMUSG00000094303			JH584297.1	1218	0.469622	0	0	0	0	0	0
ENSMUSG00000119215			2	136	0.448529	0	0	0	0	0	0
ENSMUSG00002076695			12	83	0.650602	0	0	1	0	0	0
ENSMUSG00002076940			8	57	0.684211	0	0	0	0	0	0
ENSMUSG00002076215			7	98	0.438776	0	0	0	0	0	0
ENSMUSG00002076944			2	127	0.393701	0	0	0	0	0	0
ENSMUSG00002076337			2	127	0.409449	0	0	0	0	0	0
ENSMUSG00002076824			13	126	0.571429	0	0	0	0	0	0
ENSMUSG00002076704			13	109	0.59633	0	0	0	0	0	0
ENSMUSG00002076220			19	109	0.321101	0	0	0	0	0	0
ENSMUSG00002076583			2	123	0.504065	0	0	0	0	0	0
ENSMUSG00002076586			12	98	0.265306	0	0	0	0	0	0
ENSMUSG00000118925			13	133	0.43609	0	0	0	0	0	0
ENSMUSG00002076224			15	105	0.361905	0	0	0	0	0	0
ENSMUSG00002076467			10	67	0.38806	0	0	0	0	0	0
ENSMUSG00002074887			14	121	0.495868	0	0	0	0	0	0
ENSMUSG00002076469			2	64	0.546875	0	0	0	0	0	0
ENSMUSG00000079222			GL456221.1	1205	0.453112	0	0	0	0	0	0
ENSMUSG00002076714			9	105	0.561905	0	0	0	0	0	0
ENSMUSG00002076715			10	129	0.387597	0	0	0	0	0	0
ENSMUSG00002076716			12	70	0.571429	0	0	0	0	0	0
ENSMUSG00000119485			9	72	0.430556	0	0	0	0	0	0
ENSMUSG00002076637			6	125	0.704	0	0	0	0	0	0
ENSMUSG00002076476			17	126	0.587302	0	0	0	0	0	0
ENSMUSG00000118946			7	132	0.44697	0	0	0	0	0	0
ENSMUSG00002076236			1	102	0.5	0	0	0	0	0	0
ENSMUSG00002076237			6	466	0.55794	2	5	2	8	0	3
ENSMUSG00002076965			10	204	0.382353	0	0	0	0	0	0
ENSMUSG00000118659		novel transcript	3	737	0.443691	0	0	0	0	0	0
ENSMUSG00002076561			8	58	0.37931	0	0	0	0	0	0
ENSMUSG00002074859			5	89	0.41573	0	0	0	0	0	0
ENSMUSG00002076645			16	60	0.533333	0	0	0	0	0	0
ENSMUSG00002076970			3	138	0.173913	0	0	0	0	0	0
ENSMUSG00000119029			16	132	0.5	0	0	0	0	0	0
ENSMUSG00002076245			14	168	0.589286	0	0	0	0	0	0
ENSMUSG00002076488			15	109	0.623853	0	0	0	0	0	0
ENSMUSG00000118625		polycystic kidney disease 2 (Pkd2) pseudogene	5	475	0.364211	0	6	1	1	6	5
ENSMUSG00000115115		novel protein	4	78	0.564103	0	0	0	0	0	0
ENSMUSG00000119150			11	132	0.477273	0	0	0	0	0	0
ENSMUSG00000118627		IMP3, U3 small nucleolar ribonucleoprotein, homolog (yeast) (Imp3) pseudogene	5	544	0.617647	0	0	0	0	0	0
ENSMUSG00000119270			5	123	0.479675	0	0	0	0	0	0
ENSMUSG00002076817			16	106	0.349057	0	0	0	0	0	0
ENSMUSG00002076266			9	121	0.495868	0	0	0	0	0	0
ENSMUSG00000095763			JH584299.1	1446	0.464039	0	0	0	0	0	0
ENSMUSG00002076699			2	125	0.688	0	0	0	0	0	0
ENSMUSG00002076620			8	104	0.615385	0	0	0	0	0	0
ENSMUSG00002076942			2	121	0.429752	0	0	0	0	0	0
ENSMUSG00001118660			6	129	0.488372	0	0	0	0	0	0
ENSMUSG00002076987			12	110	0.572727	0	0	0	0	0	0
ENSMUSG00002076624			5	106	0.613208	0	0	0	0	0	0
ENSMUSG00000095019			JH584303.1	1083	0.430286	0	0	0	0	0	0
ENSMUSG00002076990			11	135	0.666667	0	0	0	0	0	0
ENSMUSG00000094791			JH584299.1	837	0.467145	0	0	0	0	0	0
ENSMUSG00000091585			JH584299.1	1500	0.468667	0	0	0	0	0	0
ENSMUSG00000118999			12	132	0.484848	0	0	0	0	0	0
ENSMUSG00002076683			8	109	0.669725	20	2	3	10	14	2
ENSMUSG00000118396		IQ motif containing F3 [Source:NCBI gene (formerly Entrezgene);Acc:68265]	9	2668	0.504498	0	0	0	0	0	0
ENSMUSG00000119355			11	134	0.507463	0	0	0	0	0	0
ENSMUSG00000119544			19	93	0.419355	0	0	0	0	0	0
ENSMUSG00000094799			GL456210.1	366	0.486339	0	0	0	0	0	0
ENSMUSG00000118650		zinc finger protein 445 (Zfp44) pseudogene	X	417	0.484412	0	0	0	0	0	0
ENSMUSG00002076878			9	88	0.761364	0	0	0	0	0	0
ENSMUSG00002074853			1	140	0.485714	0	1	0	2	0	0
ENSMUSG00002076759			8	84	0.5	0	0	0	0	0	0
ENSMUSG00000096680			JH584296.1	1443	0.47124	0	0	0	0	0	0
ENSMUSG00002076761			13	110	0.618182	0	0	0	0	0	0
ENSMUSG00000090765			12	294	0.455782	0	0	0	0	0	0
ENSMUSG00000095523			JH584299.1	1446	0.464039	0	0	0	0	0	0
ENSMUSG00000119804			14	105	0.457143	0	0	0	0	0	0
ENSMUSG00000119737			13	133	0.43609	0	0	9	0	0	0
ENSMUSG00002074858			13	113	0.39823	0	0	0	0	0	0
ENSMUSG00002076672			5	126	0.579365	0	0	0	0	0	0
ENSMUSG00002076647			2	126	0.587302	0	2	0	0	0	0
ENSMUSG00002076310			13	110	0.427273	0	0	0	0	0	0
ENSMUSG00002076810			1	121	0.495868	0	0	0	0	0	0
ENSMUSG00002076286			12	160	0.55	0	0	0	0	0	0
ENSMUSG00002076772			11	99	0.454545	0	0	0	0	0	0
ENSMUSG00000117965		novel protein	10	204	0.490196	0	0	0	0	0	0
ENSMUSG00002076814			8	143	0.524476	0	0	0	9	1	0
ENSMUSG00000119093			2	132	0.431818	0	0	0	0	0	0
ENSMUSG00000119806			2	136	0.441176	0	0	0	0	0	0
ENSMUSG00002076830			11	146	0.30137	0	0	0	0	0	0
ENSMUSG00002076548			6	110	0.409091	0	0	0	0	0	0
ENSMUSG00002076307			7	70	0.6	0	0	0	0	0	0
ENSMUSG00002076953			9	95	0.473684	0	0	0	0	0	0
ENSMUSG00002076457			9	107	0.420561	0	0	0	0	0	0
ENSMUSG00000119858			5	132	0.409091	0	0	0	0	0	0
ENSMUSG00002076338			15	60	0.566667	0	0	0	0	0	0
ENSMUSG00002076541			10	89	0.382022	0	0	0	0	0	0
ENSMUSG00002076906			18	111	0.153153	3	0	0	0	6	0
ENSMUSG00002076341			6	97	0.494845	0	0	0	0	0	0
ENSMUSG00002075693			16	102	0.460784	0	0	0	0	0	0
ENSMUSG00002076667			2	127	0.401575	0	0	0	0	0	0
ENSMUSG00002076789			3	110	0.627273	0	0	0	0	0	0
ENSMUSG00002076924			7	154	0.357143	0	0	0	0	2	0
ENSMUSG00000119491			9	72	0.402778	0	0	0	0	0	0
ENSMUSG00000119291			9	132	0.454545	0	0	0	0	0	0
ENSMUSG00000117901		novel transcript, antisense to Macrod1	19	953	0.529906	42	17	53	121	36	66
ENSMUSG00002076309			16	78	0.5	0	0	0	0	0	0
ENSMUSG00002076941			5	83	0.385542	0	0	0	0	0	0
ENSMUSG00002076796			7	96	0.34375	0	0	0	0	0	0
ENSMUSG00002076676			13	110	0.627273	0	0	0	0	0	0
ENSMUSG00000119128			3	85	0.423529	0	0	0	0	0	0
ENSMUSG00002076839			6	204	0.568627	0	0	0	0	0	0
ENSMUSG00002076920			Y	60	0.533333	0	0	0	0	0	0
ENSMUSG00002076191			12	205	0.55122	0	0	0	0	0	0
ENSMUSG00002076317			2	77	0.272727	0	0	0	0	0	0
ENSMUSG00002076246			7	96	0.53125	0	0	0	0	0	0
ENSMUSG00000119268			13	132	0.44697	0	0	0	0	0	0
ENSMUSG00000119846			2	132	0.44697	0	0	0	0	0	0
ENSMUSG00000119192			3	130	0.507692	0	0	0	0	0	0
ENSMUSG00000105705		anaphase-promoting complex subunit 5 pseudogene	5	1107	0.506775	0	0	0	0	0	0
ENSMUSG00000119662			11	144	0.506944	0	0	0	0	0	0
ENSMUSG00000119666			9	72	0.416667	0	0	0	0	0	0
ENSMUSG00000118777			3	131	0.442748	0	0	0	0	0	0
ENSMUSG00000119445			3	130	0.5	0	0	0	0	0	0
ENSMUSG00002076691			10	80	0.4375	0	0	0	0	0	0
ENSMUSG00002076852			19	152	0.592105	0	0	0	0	0	0
ENSMUSG00002076973			15	175	0.445714	0	0	0	0	0	0
ENSMUSG00002076854			6	80	0.4125	0	0	0	0	0	0
ENSMUSG00002076465			11	96	0.510417	0	0	0	0	0	0
ENSMUSG00002076870			15	157	0.477707	0	0	0	0	0	0
ENSMUSG00000095787			GL456211.1	372	0.502688	0	0	0	0	0	0
ENSMUSG00000079808			GL456212.1	1910	0.496859	0	0	0	0	0	0
ENSMUSG00002076751			5	99	0.505051	0	0	0	0	0	0
ENSMUSG00000119179			6	132	0.431818	0	0	0	0	0	0
ENSMUSG00002076753			2	123	0.333333	0	0	0	0	0	0
ENSMUSG00002076943			16	74	0.527027	0	0	0	0	0	0
ENSMUSG00002076581			3	67	0.38806	0	0	0	0	0	0
ENSMUSG00000117238		novel transcript	7	7600	0.405395	0	0	0	0	0	0
ENSMUSG00002076745			15	129	0.604651	0	0	0	0	0	0
ENSMUSG00002076463			11	111	0.576577	3	4	3	1	3	8
ENSMUSG00002076343			10	110	0.609091	0	0	0	0	0	0
ENSMUSG00002076721			7	195	0.584615	0	0	0	0	0	0
ENSMUSG00000096808			GL456221.1	1500	0.382667	1	0	0	0	0	0
ENSMUSG00002076398			1	124	0.572581	0	0	0	0	0	0
ENSMUSG00002076802			11	80	0.5375	1	0	0	1	0	0
ENSMUSG00002074884			12	60	0.666667	0	0	0	0	0	0
ENSMUSG00000079800			GL456210.1	1271	0.461054	0	0	0	0	0	0
ENSMUSG00002076912			12	115	0.286957	0	0	0	0	0	0
ENSMUSG00000119005			14	132	0.416667	0	0	0	0	0	0
ENSMUSG00002076674			17	145	0.57931	0	0	0	0	0	0
ENSMUSG00002076797			6	151	0.437086	0	0	0	0	0	0
ENSMUSG00000118652		novel transcript	13	358	0.513966	0	0	0	0	0	0
ENSMUSG00002076718			7	121	0.479339	0	0	0	0	0	0
ENSMUSG00002076650			11	216	0.527778	0	0	0	0	0	0
ENSMUSG00002076935			13	70	0.442857	0	0	0	0	6	0
ENSMUSG00002076934			2	110	0.572727	0	0	0	0	0	0
ENSMUSG00002076909			8	69	0.492754	0	0	0	0	0	0
ENSMUSG00000119114			6	56	0.5	0	0	0	0	0	0
ENSMUSG00002076949			10	95	0.505263	0	0	0	0	0	0
ENSMUSG00002074883			19	115	0.4	0	0	0	0	0	0
ENSMUSG00000118744			5	71	0.492958	0	0	0	0	1	0
ENSMUSG00000096728			GL456354.1	1446	0.482019	0	0	0	0	0	0
ENSMUSG00002074875			10	214	0.462617	0	0	0	0	0	0
ENSMUSG00000119144			4	83	0.481928	5	0	1	0	5	0
ENSMUSG00002076609			10	137	0.452555	0	0	0	0	0	0
ENSMUSG00002076529			6	109	0.642202	0	0	0	0	0	0
ENSMUSG00000119884			8	132	0.5	0	0	0	0	0	0
ENSMUSG00002076867			13	83	0.361446	0	0	0	0	0	0
ENSMUSG00000118641		Zinc finger protein 974 (Zfp974) pseudogene	7	57	0.403509	0	0	0	0	0	0
ENSMUSG00000118513		renalase, FAD-dependent amine oxidase (Rnls) pseudogene	19	350	0.491429	0	0	0	0	0	0
ENSMUSG00002076793			10	101	0.49505	0	0	0	0	0	0
ENSMUSG00002076478			14	91	0.373626	0	0	0	0	0	0
ENSMUSG00000119191			10	132	0.530303	0	0	0	0	0	0
ENSMUSG00002076948			12	100	0.59	0	3	0	1	0	0
ENSMUSG00002076905			5	83	0.421687	0	0	0	0	0	0
ENSMUSG00002076431			15	129	0.573643	0	0	0	0	0	0
ENSMUSG00000119649			4	83	0.481928	11	3	0	5	4	0
ENSMUSG00002074878			17	109	0.633028	0	0	0	0	0	0
ENSMUSG00000094054			GL456211.1	891	0.484848	0	0	0	0	0	0
ENSMUSG00002076880			8	91	0.417582	0	0	0	0	0	0
ENSMUSG00002076866			3	117	0.512821	0	0	0	0	0	0
ENSMUSG00002076518			6	128	0.648438	0	0	0	0	0	0
ENSMUSG00002076794			2	102	0.5	0	0	0	0	0	0
ENSMUSG00002076831			6	59	0.694915	0	0	0	0	0	0
ENSMUSG00000118647		calmodulin-like 6 (CALML6) pseudogene	4	224	0.517857	0	0	0	0	0	0
ENSMUSG00002076673			2	77	0.532468	0	0	0	0	0	0
ENSMUSG00002076584			17	125	0.592	0	0	0	0	0	0
ENSMUSG00000119610			15	132	0.469697	0	0	0	0	0	0
ENSMUSG00002076812			X	102	0.5	0	0	0	0	0	0
ENSMUSG00000115798		novel protein	15	213	0.549296	0	0	0	0	0	0
ENSMUSG00000118645			6	480	0.49375	0	0	0	0	0	0
ENSMUSG00000119068			16	132	0.477273	0	0	0	0	0	0
ENSMUSG00000119087			6	132	0.477273	0	0	0	0	0	0
ENSMUSG00000119001			15	132	0.515152	0	0	0	0	0	0
ENSMUSG00002076851			X	95	0.505263	4	0	0	0	1	0
ENSMUSG00000118644		sperm antigen with calponin homology and coiled-coil domains 1 (Specc1) pseudogene	11	133	0.518797	5	2	0	0	6	0
ENSMUSG00000079794			GL456210.1	255	0.470588	0	0	0	0	0	0
ENSMUSG00002076595			13	110	0.409091	0	0	0	0	0	0
ENSMUSG00002076872			4	76	0.671053	0	0	0	0	0	0
ENSMUSG00000119065			11	132	0.424242	0	0	0	0	0	0
ENSMUSG00002076967			3	138	0.637681	0	0	0	0	0	0
ENSMUSG00000109644	0610005C13Rik	RIKEN cDNA 0610005C13 gene [Source:MGI Symbol;Acc:MGI:1918911]	7	3583	0.538934	2	1	2	0	0	0
ENSMUSG00000108652	0610006L08Rik	RIKEN cDNA 0610006L08 gene [Source:MGI Symbol;Acc:MGI:1923503]	7	2128	0.443609	4	2	0	1	2	0
ENSMUSG00000007777	0610009B22Rik	RIKEN cDNA 0610009B22 gene [Source:MGI Symbol;Acc:MGI:1913300]	11	998	0.460922	53	54	39	25	48	18
ENSMUSG00000086714	0610009E02Rik	RIKEN cDNA 0610009E02 gene [Source:MGI Symbol;Acc:MGI:3698435]	2	1803	0.501387	15	21	3	9	22	6
ENSMUSG00000043644	0610009L18Rik	RIKEN cDNA 0610009L18 gene [Source:MGI Symbol;Acc:MGI:1914088]	11	619	0.602585	53	23	27	28	24	22
ENSMUSG00000042208	0610010F05Rik	RIKEN cDNA 0610010F05 gene [Source:MGI Symbol;Acc:MGI:1918925]	11	5226	0.410065	80	121	99	93	110	60
ENSMUSG00000020831	0610010K14Rik	RIKEN cDNA 0610010K14 gene [Source:MGI Symbol;Acc:MGI:1915609]	11	1896	0.55538	10	3	0	0	1	0
ENSMUSG00000089755	0610012D04Rik	RIKEN cDNA 0610012D04 gene [Source:MGI Symbol;Acc:MGI:1918926]	17	531	0.478343	0	0	0	0	0	0
ENSMUSG00000107002	0610012G03Rik	RIKEN cDNA 0610012G03 gene [Source:MGI Symbol;Acc:MGI:1913301]	16	1445	0.545329	214	136	155	212	166	118
ENSMUSG00000046683	0610025J13Rik	RIKEN cDNA 0610025J13 gene [Source:MGI Symbol;Acc:MGI:1915618]	4	1121	0.508475	0	0	0	0	0	0
ENSMUSG00000058706	0610030E20Rik	RIKEN cDNA 0610030E20 gene [Source:MGI Symbol;Acc:MGI:1915614]	6	5832	0.48011	187	162	145	138	180	62
ENSMUSG00000099146	0610031O16Rik	RIKEN cDNA 0610031O16 gene [Source:MGI Symbol;Acc:MGI:1915619]	3	2482	0.463739	0	0	0	0	0	0
ENSMUSG00000108236	0610033M10Rik	RIKEN cDNA 0610033M10 gene [Source:MGI Symbol;Acc:MGI:1921343]	6	1102	0.490926	0	0	0	0	0	0
ENSMUSG00000097882	0610038B21Rik	RIKEN cDNA 0610038B21 gene [Source:MGI Symbol;Acc:MGI:1917595]	8	3071	0.552589	0	1	7	0	1	0
ENSMUSG00000058812	0610039K10Rik	RIKEN cDNA 0610039K10 gene [Source:MGI Symbol;Acc:MGI:1915636]	2	952	0.584034	1	3	2	0	1	0
ENSMUSG00000089889	0610040B10Rik	RIKEN cDNA 0610040B10 gene [Source:MGI Symbol;Acc:MGI:1914922]	5	2098	0.461392	8	11	11	10	7	2
ENSMUSG00000087341	0610040F04Rik	RIKEN cDNA 0610040F04 gene [Source:MGI Symbol;Acc:MGI:1922644]	6	2150	0.47814	0	2	2	4	0	12
ENSMUSG00000060512	0610040J01Rik	RIKEN cDNA 0610040J01 gene [Source:MGI Symbol;Acc:MGI:1923511]	5	2403	0.54432	0	0	7	12	4	16
ENSMUSG00000087361	0610043K17Rik	RIKEN cDNA 0610043K17 gene [Source:MGI Symbol;Acc:MGI:1915650]	4	770	0.431169	6	3	9	14	3	0
ENSMUSG00000114511	0710001A04Rik	RIKEN cDNA 0710001A04 gene [Source:MGI Symbol;Acc:MGI:1915652]	18	1345	0.437918	0	0	0	0	0	0
ENSMUSG00000097863	1010001B22Rik	RIKEN cDNA 1010001B22 gene [Source:MGI Symbol;Acc:MGI:1922653]	5	589	0.55348	9	0	8	12	12	10
ENSMUSG00000115547	1100001I12Rik	RIKEN cDNA 1100001I12 gene [Source:MGI Symbol;Acc:MGI:1922655]	15	672	0.403274	0	0	0	0	0	0
ENSMUSG00000090066	1110002E22Rik	RIKEN cDNA 1110002E22 gene [Source:MGI Symbol;Acc:MGI:1915066]	3	9998	0.4999	5	13	1	13	8	0
ENSMUSG00000097134	1110002J07Rik	RIKEN cDNA 1110002J07 gene [Source:MGI Symbol;Acc:MGI:1915738]	10	2513	0.475925	0	0	0	0	0	0
ENSMUSG00000071456	1110002L01Rik	RIKEN cDNA 1110002L01 gene [Source:MGI Symbol;Acc:MGI:1915821]	12	4131	0.468168	134	140	123	130	103	91
ENSMUSG00000102531	1110002O04Rik	RIKEN cDNA 1110002O04 gene [Source:MGI Symbol;Acc:MGI:1915733]	1	566	0.512367	0	3	1	0	0	0
ENSMUSG00000106291	1110003F10Rik	RIKEN cDNA 1110003F10 gene [Source:MGI Symbol;Acc:MGI:1915726]	5	767	0.418514	7	11	1	1	1	0
ENSMUSG00000030663	1110004F10Rik	RIKEN cDNA 1110004F10 gene [Source:MGI Symbol;Acc:MGI:1929274]	7	2490	0.473092	1105	1052	1042	1234	978	965
ENSMUSG00000107121	1110006O24Rik	RIKEN cDNA 1110006O24 gene [Source:MGI Symbol;Acc:MGI:1913373]	5	768	0.59375	1	3	0	10	5	0
ENSMUSG00000046119	1110008E08Rik	RIKEN cDNA 1110008E08 gene [Source:MGI Symbol;Acc:MGI:1915750]	16	723	0.521438	0	0	0	0	0	0
ENSMUSG00000039195	1110008P14Rik	RIKEN cDNA 1110008P14 gene [Source:MGI Symbol;Acc:MGI:1920987]	2	2694	0.577209	68	77	70	87	123	119
ENSMUSG00000116164	1110013H19Rik	RIKEN cDNA 1110013H19 gene [Source:MGI Symbol;Acc:MGI:1915772]	15	671	0.502235	0	2	1	0	0	2
ENSMUSG00000098659	1110015O18Rik	RIKEN cDNA 1110015O18 gene [Source:MGI Symbol;Acc:MGI:1915766]	3	2035	0.335135	0	0	0	0	0	0
ENSMUSG00000028441	1110017D15Rik	RIKEN cDNA 1110017D15 gene [Source:MGI Symbol;Acc:MGI:1920971]	4	1421	0.546094	4	1	0	3	1	0
ENSMUSG00000085151	1110018N20Rik	RIKEN cDNA 1110018N20 gene [Source:MGI Symbol;Acc:MGI:1915753]	2	1579	0.51425	5	3	3	5	2	16
ENSMUSG00000112289	1110019B22Rik	RIKEN cDNA 1110019B22 gene [Source:MGI Symbol;Acc:MGI:1915779]	10	1000	0.525	0	0	0	0	0	0
ENSMUSG00000097616	1110019D14Rik	RIKEN cDNA 1110019D14 gene [Source:MGI Symbol;Acc:MGI:1923561]	6	1734	0.393887	25	25	27	34	19	2
ENSMUSG00000097047	1110020A21Rik	RIKEN cDNA 1110020A21 gene [Source:MGI Symbol;Acc:MGI:1915781]	17	1272	0.478774	7	7	13	9	2	1
ENSMUSG00000068073	1110025L11Rik	RIKEN cDNA 1110025L11 gene [Source:MGI Symbol;Acc:MGI:1915887]	16	591	0.467005	0	0	0	0	0	0
ENSMUSG00000103520	1110025M09Rik	RIKEN cDNA 1110025M09 gene [Source:MGI Symbol;Acc:MGI:1915885]	15	855	0.419883	10	4	13	11	8	5
ENSMUSG00000085972	1110028F11Rik	RIKEN cDNA 1110028F11 gene [Source:MGI Symbol;Acc:MGI:1915940]	11	976	0.484631	3	12	1	9	9	3
ENSMUSG00000099139	1110028F18Rik	RIKEN cDNA 1110028F18 gene [Source:MGI Symbol;Acc:MGI:1915942]	8	1341	0.489933	0	0	0	0	0	0
ENSMUSG00000037971	1110032A03Rik	RIKEN cDNA 1110032A03 gene [Source:MGI Symbol;Acc:MGI:1915971]	9	5293	0.47799	102	166	207	178	120	114
ENSMUSG00000046999	1110032F04Rik	RIKEN cDNA 1110032F04 gene [Source:MGI Symbol;Acc:MGI:1915975]	3	2578	0.529868	0	0	0	0	0	0
ENSMUSG00000099098	1110035H17Rik	RIKEN cDNA 1110035H17 gene [Source:MGI Symbol;Acc:MGI:1915936]	7	1241	0.591459	2	0	2	3	2	0
ENSMUSG00000092203	1110038B12Rik	RIKEN cDNA 1110038B12 gene [Source:MGI Symbol;Acc:MGI:1916013]	17	1811	0.503589	55	45	59	51	26	46
ENSMUSG00000063236	1110038F14Rik	RIKEN cDNA 1110038F14 gene [Source:MGI Symbol;Acc:MGI:2152337]	15	1916	0.530793	155	202	200	203	142	144
ENSMUSG00000085457	1110046J04Rik	RIKEN cDNA 1110046J04 gene [Source:MGI Symbol;Acc:MGI:1916058]	13	3487	0.454259	22	20	34	18	26	14
ENSMUSG00000040591	1110051M20Rik	RIKEN cDNA 1110051M20 gene [Source:MGI Symbol;Acc:MGI:1915079]	2	5202	0.517686	315	351	306	310	282	295
ENSMUSG00000068067	1110057P08Rik	RIKEN cDNA 1110057P08 gene [Source:MGI Symbol;Acc:MGI:1916094]	16	465	0.408602	0	0	0	0	0	0
ENSMUSG00000035171	1110059E24Rik	RIKEN cDNA 1110059E24 gene [Source:MGI Symbol;Acc:MGI:1913456]	19	3067	0.43267	50	56	83	81	85	63
ENSMUSG00000032551	1110059G10Rik	RIKEN cDNA 1110059G10 gene [Source:MGI Symbol;Acc:MGI:1913452]	9	5594	0.415445	59	36	42	74	50	52
ENSMUSG00000105036	1110060G06Rik	RIKEN cDNA 1110060G06 gene [Source:MGI Symbol;Acc:MGI:1916064]	5	499	0.380762	0	0	0	0	0	0
ENSMUSG00000078570	1110065P20Rik	RIKEN cDNA 1110065P20 gene [Source:MGI Symbol;Acc:MGI:1916170]	4	2069	0.611406	72	139	117	127	78	88
ENSMUSG00000111857	1190001M18Rik	RIKEN cDNA 1190001M18 gene [Source:MGI Symbol;Acc:MGI:1916174]	11	1270	0.444094	0	0	0	2	0	0
ENSMUSG00000043687	1190005I06Rik	RIKEN cDNA 1190005I06 gene [Source:MGI Symbol;Acc:MGI:1916168]	8	1083	0.648199	6	6	1	0	3	0
ENSMUSG00000063320	1190007I07Rik	RIKEN cDNA 1190007I07 gene [Source:MGI Symbol;Acc:MGI:3698433]	10	1197	0.519632	23	27	34	28	33	25
ENSMUSG00000110013	1190028D05Rik	RIKEN cDNA 1190028D05 gene [Source:MGI Symbol;Acc:MGI:3036227]	8	763	0.40367	0	0	0	0	0	0
ENSMUSG00000087684	1200007C13Rik	RIKEN cDNA 1200007C13 gene [Source:MGI Symbol;Acc:MGI:1921369]	2	2455	0.562118	0	4	7	27	10	9
ENSMUSG00000097290	1300002E11Rik	RIKEN cDNA 1300002E11 gene [Source:MGI Symbol;Acc:MGI:1919001]	16	4213	0.43342	191	186	102	157	175	62
ENSMUSG00000112545	1300014J16Rik	RIKEN cDNA 1300014J16 gene [Source:MGI Symbol;Acc:MGI:1921410]	12	1337	0.513089	5	0	2	9	5	3
ENSMUSG00000033688	1300017J02Rik	RIKEN cDNA 1300017J02 gene [Source:MGI Symbol;Acc:MGI:1919025]	9	4508	0.502884	11	34	11	5	16	16
ENSMUSG00000096221	1500002C15Rik	RIKEN cDNA 1500002C15 gene [Source:MGI Symbol;Acc:MGI:1916196]	4	2183	0.51443	19	12	9	20	9	2
ENSMUSG00000097595	1500002F19Rik	RIKEN cDNA 1500002F19 gene [Source:MGI Symbol;Acc:MGI:1923933]	7	1239	0.51816	3	12	11	9	2	7
ENSMUSG00000098912	1500004A13Rik	RIKEN cDNA 1500004A13 gene [Source:MGI Symbol;Acc:MGI:2442808]	3	13854	0.476036	192	161	69	112	121	86
ENSMUSG00000104888	1500005C15Rik	RIKEN cDNA 1500005C15 gene [Source:MGI Symbol;Acc:MGI:1919269]	3	2394	0.458647	0	0	0	7	4	0
ENSMUSG00000068099	1500009C09Rik	RIKEN cDNA 1500009C09 gene [Source:MGI Symbol;Acc:MGI:1923755]	15	1904	0.550945	9	23	27	31	19	24
ENSMUSG00000087651	1500009L16Rik	RIKEN cDNA 1500009L16 gene [Source:MGI Symbol;Acc:MGI:1917034]	10	3465	0.464646	25	21	7	28	14	5
ENSMUSG00000072694	1500011B03Rik	RIKEN cDNA 1500011B03 gene [Source:MGI Symbol;Acc:MGI:1913486]	5	2693	0.502785	220	271	265	272	277	285
ENSMUSG00000097247	1500012K07Rik	RIKEN cDNA 1500012K07 gene [Source:MGI Symbol;Acc:MGI:1916204]	7	2630	0.437643	2	0	0	0	6	6
ENSMUSG00000098702	1500015A07Rik	RIKEN cDNA 1500015A07 gene [Source:MGI Symbol;Acc:MGI:1916232]	18	2296	0.47169	44	27	21	8	11	13
ENSMUSG00000094732	1500015L24Rik	RIKEN cDNA 1500015L24 gene [Source:MGI Symbol;Acc:MGI:1916244]	19	2743	0.423259	19	26	13	28	27	20
ENSMUSG00000097383	1500026H17Rik	RIKEN cDNA 1500026H17 gene [Source:MGI Symbol;Acc:MGI:1916252]	10	3027	0.428807	5	2	7	17	3	1
ENSMUSG00000117718	1500032F14Rik	RIKEN cDNA 1500032F14 gene [Source:MGI Symbol;Acc:MGI:1925555]	19	460	0.541304	0	2	0	0	0	0
ENSMUSG00000059631	1500035N22Rik	RIKEN cDNA 1500035N22 gene [Source:MGI Symbol;Acc:MGI:1917508]	5	865	0.477457	0	0	0	0	0	0
ENSMUSG00000043747	1520401A03Rik	RIKEN cDNA 1520401A03 gene [Source:MGI Symbol;Acc:MGI:2443785]	17	4111	0.542934	0	0	1	1	0	0
ENSMUSG00000117232	1600002D24Rik	RIKEN cDNA 1600002D24 gene [Source:MGI Symbol;Acc:MGI:1917026]	16	2822	0.506733	2	0	3	2	0	0
ENSMUSG00000101585	1600010M07Rik	RIKEN cDNA 1600010M07 gene [Source:MGI Symbol;Acc:MGI:1917031]	7	1729	0.463274	0	0	0	0	0	0
ENSMUSG00000050088	1600012H06Rik	RIKEN cDNA 1600012H06 gene [Source:MGI Symbol;Acc:MGI:1915162]	17	3294	0.440498	125	141	157	155	160	100
ENSMUSG00000047661	1600012P17Rik	RIKEN cDNA 1600012P17 gene [Source:MGI Symbol;Acc:MGI:1919275]	1	2592	0.430556	0	0	0	0	0	0
ENSMUSG00000054676	1600014C10Rik	RIKEN cDNA 1600014C10 gene [Source:MGI Symbol;Acc:MGI:1919494]	7	3948	0.509878	26	29	20	24	24	49
ENSMUSG00000094690	1600014C23Rik	RIKEN cDNA 1600014C23 gene [Source:MGI Symbol;Acc:MGI:1919490]	17	518	0.523166	2	0	3	0	1	4
ENSMUSG00000102505	1600017P15Rik	RIKEN cDNA 1600017P15 gene [Source:MGI Symbol;Acc:MGI:1920499]	3	890	0.568539	0	0	0	2	0	0
ENSMUSG00000099429	1600019K03Rik	RIKEN cDNA 1600019K03 gene [Source:MGI Symbol;Acc:MGI:1917018]	16	477	0.469602	0	0	0	0	0	0
ENSMUSG00000097048	1600020E01Rik	RIKEN cDNA 1600020E01 gene [Source:MGI Symbol;Acc:MGI:1919262]	6	4328	0.503466	82	131	116	114	126	78
ENSMUSG00000117315	1600022D10Rik	RIKEN cDNA 1600022D10 gene [Source:MGI Symbol;Acc:MGI:1920502]	17	1562	0.419974	0	0	0	0	0	0
ENSMUSG00000104986	1600023N17Rik	RIKEN cDNA 1600023N17 gene [Source:MGI Symbol;Acc:MGI:1917038]	5	1007	0.496524	0	0	0	1	0	0
ENSMUSG00000085114	1600025M17Rik	RIKEN cDNA 1600025M17 gene [Source:MGI Symbol;Acc:MGI:1919280]	X	1071	0.438842	0	0	0	0	0	0
ENSMUSG00000110340	1600027J07Rik	RIKEN cDNA 1600027J07 gene [Source:MGI Symbol;Acc:MGI:1917044]	8	489	0.453988	0	0	0	0	0	3
ENSMUSG00000057818	1600029O15Rik	RIKEN cDNA 1600029O15 gene [Source:MGI Symbol;Acc:MGI:3045362]	9	1809	0.464898	0	0	0	0	0	0
ENSMUSG00000047150	1700001C19Rik	RIKEN cDNA 1700001C19 gene [Source:MGI Symbol;Acc:MGI:1922712]	17	1896	0.518987	0	0	0	0	0	0
ENSMUSG00000099419	1700001D01Rik	RIKEN cDNA 1700001D01 gene [Source:MGI Symbol;Acc:MGI:1916529]	8	565	0.472566	3	0	0	0	1	2
ENSMUSG00000095384	1700001F09Rik	RIKEN cDNA 1700001F09 gene [Source:MGI Symbol;Acc:MGI:1919076]	14	884	0.397059	0	0	0	0	0	0
ENSMUSG00000087170	1700001G01Rik	RIKEN cDNA 1700001G01 gene [Source:MGI Symbol;Acc:MGI:1922683]	18	2249	0.425078	0	0	0	0	0	0
ENSMUSG00000085984	1700001G11Rik	RIKEN cDNA 1700001G11 gene [Source:MGI Symbol;Acc:MGI:1916553]	14	1080	0.533333	0	2	0	0	2	0
ENSMUSG00000103746	1700001G17Rik	RIKEN cDNA 1700001G17 gene [Source:MGI Symbol;Acc:MGI:1914753]	1	889	0.575928	0	0	0	0	0	2
ENSMUSG00000095040	1700001J03Rik	RIKEN cDNA 1700001J03 gene [Source:MGI Symbol;Acc:MGI:1916532]	5	868	0.493088	0	7	1	0	20	1
ENSMUSG00000086135	1700001J04Rik	RIKEN cDNA 1700001J04 gene [Source:MGI Symbol;Acc:MGI:1919075]	11	929	0.533907	0	0	0	0	0	0
ENSMUSG00000101963	1700001J11Rik	RIKEN cDNA 1700001J11 gene [Source:MGI Symbol;Acc:MGI:1919474]	9	2664	0.464715	5	0	0	4	0	1
ENSMUSG00000056508	1700001K19Rik	RIKEN cDNA 1700001K19 gene [Source:MGI Symbol;Acc:MGI:1913573]	12	955	0.566492	0	1	2	0	0	0
ENSMUSG00000118314	1700001K23Rik	RIKEN cDNA 1700001K23 gene [Source:MGI Symbol;Acc:MGI:1916569]	19	1535	0.490554	0	0	2	0	0	0
ENSMUSG00000075511	1700001L05Rik	RIKEN cDNA 1700001L05 gene [Source:MGI Symbol;Acc:MGI:1916541]	15	6112	0.466787	34	32	34	51	25	14
ENSMUSG00000021534	1700001L19Rik	RIKEN cDNA 1700001L19 gene [Source:MGI Symbol;Acc:MGI:1916565]	13	1826	0.464951	0	0	0	0	0	0
ENSMUSG00000106210	1700001N15Rik	RIKEN cDNA 1700001N15 gene [Source:MGI Symbol;Acc:MGI:1923629]	3	482	0.408714	0	0	0	0	0	0
ENSMUSG00000044320	1700001O22Rik	RIKEN cDNA 1700001O22 gene [Source:MGI Symbol;Acc:MGI:1923631]	2	2788	0.592181	12	2	0	3	1	5
ENSMUSG00000018543	1700001P01Rik	RIKEN cDNA 1700001P01 gene [Source:MGI Symbol;Acc:MGI:1919465]	11	624	0.508013	7	0	0	0	0	0
ENSMUSG00000099391	1700003C15Rik	RIKEN cDNA 1700003C15 gene [Source:MGI Symbol;Acc:MGI:1916595]	5	1871	0.407803	0	0	0	0	0	0
ENSMUSG00000085944	1700003D09Rik	RIKEN cDNA 1700003D09 gene [Source:MGI Symbol;Acc:MGI:1916588]	11	1389	0.536357	0	0	0	0	0	2
ENSMUSG00000030030	1700003E16Rik	RIKEN cDNA 1700003E16 gene [Source:MGI Symbol;Acc:MGI:1919087]	6	2221	0.606033	13	6	1	10	5	3
ENSMUSG00000095110	1700003E24Rik	RIKEN cDNA 1700003E24 gene [Source:MGI Symbol;Acc:MGI:1916607]	X	577	0.450607	0	0	0	0	0	0
ENSMUSG00000038523	1700003F12Rik	RIKEN cDNA 1700003F12 gene [Source:MGI Symbol;Acc:MGI:1922730]	2	976	0.643443	2	0	0	2	7	0
ENSMUSG00000087621	1700003G18Rik	RIKEN cDNA 1700003G18 gene [Source:MGI Symbol;Acc:MGI:1916600]	7	1799	0.411895	0	0	0	0	0	0
ENSMUSG00000039174	1700003H04Rik	RIKEN cDNA 1700003H04 gene [Source:MGI Symbol;Acc:MGI:1923637]	3	1591	0.412319	0	0	0	0	0	0
ENSMUSG00000107526	1700003I16Rik	RIKEN cDNA 1700003I16 gene [Source:MGI Symbol;Acc:MGI:1923949]	6	1058	0.454631	0	0	0	0	0	0
ENSMUSG00000100372	1700003I22Rik	RIKEN cDNA 1700003I22 gene [Source:MGI Symbol;Acc:MGI:1916606]	1	482	0.470954	0	0	0	0	0	0
ENSMUSG00000101565	1700003L19Rik	RIKEN cDNA 1700003L19 gene [Source:MGI Symbol;Acc:MGI:1922743]	16	1269	0.437352	0	0	0	0	0	0
ENSMUSG00000085389	1700003M07Rik	RIKEN cDNA 1700003M07 gene [Source:MGI Symbol;Acc:MGI:1919475]	4	873	0.533792	1	8	7	0	4	6
ENSMUSG00000102463	1700003N22Rik	RIKEN cDNA 1700003N22 gene [Source:MGI Symbol;Acc:MGI:1919464]	3	808	0.601485	0	0	0	0	0	0
ENSMUSG00000118311	1700003O11Rik	RIKEN cDNA 1700003O11 gene [Source:MGI Symbol;Acc:MGI:1922882]	18	582	0.503436	0	0	0	0	1	0
ENSMUSG00000100727	1700003P14Rik	RIKEN cDNA 1700003P14 gene [Source:MGI Symbol;Acc:MGI:1916594]	13	1146	0.391798	0	0	0	0	0	0
ENSMUSG00000027973	1700006A11Rik	RIKEN cDNA 1700006A11 gene [Source:MGI Symbol;Acc:MGI:1919074]	3	2161	0.412309	0	0	0	0	0	0
ENSMUSG00000100274	1700006F04Rik	RIKEN cDNA 1700006F04 gene [Source:MGI Symbol;Acc:MGI:1922682]	14	441	0.433107	0	1	0	0	0	0
ENSMUSG00000102000	1700006H21Rik	RIKEN cDNA 1700006H21 gene [Source:MGI Symbol;Acc:MGI:1919507]	13	627	0.508772	0	0	0	0	0	0
ENSMUSG00000034764	1700006J14Rik	RIKEN cDNA 1700006J14 gene [Source:MGI Symbol;Acc:MGI:2447818]	10	2885	0.464471	0	0	2	0	0	0
ENSMUSG00000102738	1700006P03Rik	RIKEN cDNA 1700006P03 gene [Source:MGI Symbol;Acc:MGI:1925628]	1	409	0.435208	0	0	0	0	0	0
ENSMUSG00000101234	1700007E05Rik	RIKEN cDNA 1700007E05 gene [Source:MGI Symbol;Acc:MGI:2149745]	16	2628	0.436073	0	1	0	0	0	0
ENSMUSG00000100666	1700007F19Rik	RIKEN cDNA 1700007F19 gene [Source:MGI Symbol;Acc:MGI:1915100]	3	1642	0.4257	0	11	1	2	8	0
ENSMUSG00000116556	1700007H22Rik	RIKEN cDNA 1700007H22 gene [Source:MGI Symbol;Acc:MGI:1922734]	16	537	0.43203	0	0	0	0	0	0
ENSMUSG00000086330	1700007J10Rik	RIKEN cDNA 1700007J10 gene [Source:MGI Symbol;Acc:MGI:1916570]	11	1298	0.493837	0	2	1	13	7	2
ENSMUSG00000026831	1700007K13Rik	RIKEN cDNA 1700007K13 gene [Source:MGI Symbol;Acc:MGI:1916577]	2	965	0.525389	0	0	0	5	0	0
ENSMUSG00000097318	1700007L15Rik	RIKEN cDNA 1700007L15 gene [Source:MGI Symbol;Acc:MGI:1916581]	16	738	0.520325	13	2	11	26	12	1
ENSMUSG00000086613	1700007M16Rik	RIKEN cDNA 1700007M16 gene [Source:MGI Symbol;Acc:MGI:1919487]	2	435	0.448276	0	0	0	0	0	0
ENSMUSG00000089730	1700007P06Rik	RIKEN cDNA 1700007P06 gene [Source:MGI Symbol;Acc:MGI:1916558]	1	823	0.504253	0	0	0	0	0	0
ENSMUSG00000103452	1700008A23Rik	RIKEN cDNA 1700008A23 gene [Source:MGI Symbol;Acc:MGI:1922713]	9	691	0.510854	0	0	2	4	0	0
ENSMUSG00000104872	1700008B11Rik	RIKEN cDNA 1700008B11 gene [Source:MGI Symbol;Acc:MGI:1913571]	5	634	0.55205	0	6	20	5	2	0
ENSMUSG00000111986	1700008C04Rik	RIKEN cDNA 1700008C04 gene [Source:MGI Symbol;Acc:MGI:1922744]	12	797	0.461731	0	0	0	0	0	0
ENSMUSG00000106860	1700008H02Rik	RIKEN cDNA 1700008H02 gene [Source:MGI Symbol;Acc:MGI:1913575]	5	1684	0.388361	0	0	0	0	0	0
ENSMUSG00000101225	1700008J07Rik	RIKEN cDNA 1700008J07 gene [Source:MGI Symbol;Acc:MGI:1916610]	7	2432	0.512336	56	65	50	61	59	84
ENSMUSG00000101012	1700008K24Rik	RIKEN cDNA 1700008K24 gene [Source:MGI Symbol;Acc:MGI:1916561]	17	950	0.504211	0	0	0	0	0	0
ENSMUSG00000109657	1700008N11Rik	RIKEN cDNA 1700008N11 gene [Source:MGI Symbol;Acc:MGI:1922692]	8	636	0.424528	0	0	0	0	0	0
ENSMUSG00000008028	1700008O03Rik	RIKEN cDNA 1700008O03 gene [Source:MGI Symbol;Acc:MGI:1916599]	7	3675	0.518367	3	14	1	3	5	1
ENSMUSG00000069118	1700008P02Rik	RIKEN cDNA 1700008P02 gene [Source:MGI Symbol;Acc:MGI:1916597]	3	783	0.440613	0	0	0	0	0	0
ENSMUSG00000101404	1700009C05Rik	RIKEN cDNA 1700009C05 gene [Source:MGI Symbol;Acc:MGI:1921470]	6	788	0.442893	0	0	0	0	0	0
ENSMUSG00000096573	1700009J07Rik	RIKEN cDNA 1700009J07 gene [Source:MGI Symbol;Acc:MGI:1914938]	10	1368	0.51462	0	0	0	0	0	0
ENSMUSG00000028287	1700009N14Rik	RIKEN cDNA 1700009N14 gene [Source:MGI Symbol;Acc:MGI:1922721]	4	1258	0.5	0	0	0	0	0	0
ENSMUSG00000057047	1700010B08Rik	RIKEN cDNA 1700010B08 gene [Source:MGI Symbol;Acc:MGI:1922735]	2	899	0.509455	0	0	0	0	0	0
ENSMUSG00000099958	1700010B13Rik	RIKEN cDNA 1700010B13 gene [Source:MGI Symbol;Acc:MGI:1922741]	15	2102	0.499524	0	0	0	0	0	0
ENSMUSG00000071721	1700010D01Rik	RIKEN cDNA 1700010D01 gene [Source:MGI Symbol;Acc:MGI:1923636]	X	507	0.451677	0	0	0	0	0	0
ENSMUSG00000115752	1700010G06Rik	RIKEN cDNA 1700010G06 gene [Source:MGI Symbol;Acc:MGI:1921467]	15	683	0.484627	0	5	0	0	0	0
ENSMUSG00000067101	1700010H22Rik	RIKEN cDNA 1700010H22 gene [Source:MGI Symbol;Acc:MGI:1922750]	5	1355	0.41107	2	0	0	3	0	0
ENSMUSG00000100010	1700010I02Rik	RIKEN cDNA 1700010I02 gene [Source:MGI Symbol;Acc:MGI:1922726]	3	577	0.400347	0	0	0	0	0	0
ENSMUSG00000023873	1700010I14Rik	RIKEN cDNA 1700010I14 gene [Source:MGI Symbol;Acc:MGI:1914181]	17	2292	0.484729	0	5	10	13	4	1
ENSMUSG00000100314	1700010J16Rik	RIKEN cDNA 1700010J16 gene [Source:MGI Symbol;Acc:MGI:1916605]	10	928	0.414871	0	0	0	0	0	0
ENSMUSG00000092599	1700010K23Rik	RIKEN cDNA 1700010K23 gene [Source:MGI Symbol;Acc:MGI:1922751]	16	376	0.396277	2	0	1	0	0	0
ENSMUSG00000085102	1700010K24Rik	RIKEN cDNA 1700010K24 gene [Source:MGI Symbol;Acc:MGI:1922690]	3	226	0.473451	4	0	0	0	1	0
ENSMUSG00000030636	1700010L04Rik	RIKEN cDNA 1700010L04 gene [Source:MGI Symbol;Acc:MGI:1916583]	7	1577	0.447685	0	0	0	0	0	0
ENSMUSG00000101855	1700010N08Rik	RIKEN cDNA 1700010N08 gene [Source:MGI Symbol;Acc:MGI:1916590]	7	1414	0.448373	0	0	0	0	0	0
ENSMUSG00000102099	1700011B04Rik	RIKEN cDNA 1700011B04 gene [Source:MGI Symbol;Acc:MGI:1922894]	13	4166	0.417907	0	0	0	0	0	0
ENSMUSG00000108800	1700011C11Rik	RIKEN cDNA 1700011C11 gene [Source:MGI Symbol;Acc:MGI:1922701]	7	365	0.449315	0	0	0	0	0	0
ENSMUSG00000108791	1700011D18Rik	RIKEN cDNA 1700011D18 gene [Source:MGI Symbol;Acc:MGI:1922714]	7	277	0.509025	0	0	0	0	0	0
ENSMUSG00000109759	1700011L03Rik	RIKEN cDNA 1700011L03 gene [Source:MGI Symbol;Acc:MGI:1916535]	8	608	0.529605	0	0	0	0	0	0
ENSMUSG00000031682	1700011L22Rik	RIKEN cDNA 1700011L22 gene [Source:MGI Symbol;Acc:MGI:1914937]	8	1026	0.515595	0	0	0	0	0	0
ENSMUSG00000079476	1700011M02Rik	RIKEN cDNA 1700011M02 gene [Source:MGI Symbol;Acc:MGI:1922693]	X	420	0.533333	0	0	0	0	0	0
ENSMUSG00000029766	1700012A03Rik	RIKEN cDNA 1700012A03 gene [Source:MGI Symbol;Acc:MGI:1923632]	6	1008	0.509921	0	0	0	0	0	0
ENSMUSG00000020617	1700012B07Rik	RIKEN cDNA 1700012B07 gene [Source:MGI Symbol;Acc:MGI:1916574]	11	2177	0.502526	0	0	0	0	0	0
ENSMUSG00000031927	1700012B09Rik	RIKEN cDNA 1700012B09 gene [Source:MGI Symbol;Acc:MGI:1916575]	9	819	0.484737	2	0	0	0	0	0
ENSMUSG00000086482	1700012C08Rik	RIKEN cDNA 1700012C08 gene [Source:MGI Symbol;Acc:MGI:1923635]	4	363	0.495868	0	0	0	0	0	0
ENSMUSG00000085470	1700012C14Rik	RIKEN cDNA 1700012C14 gene [Source:MGI Symbol;Acc:MGI:1916587]	6	622	0.501608	0	0	0	0	0	0
ENSMUSG00000110424	1700012D14Rik	RIKEN cDNA 1700012D14 gene [Source:MGI Symbol;Acc:MGI:1922729]	7	4153	0.431977	37	26	11	13	23	11
ENSMUSG00000105023	1700012D16Rik	RIKEN cDNA 1700012D16 gene [Source:MGI Symbol;Acc:MGI:1922739]	3	577	0.490468	0	11	1	2	4	0
ENSMUSG00000101275	1700012E03Rik	RIKEN cDNA 1700012E03 gene [Source:MGI Symbol;Acc:MGI:1923817]	1	1377	0.49528	0	0	0	0	0	0
ENSMUSG00000102069	1700012I11Rik	RIKEN cDNA 1700012I11 gene [Source:MGI Symbol;Acc:MGI:1916584]	15	1039	0.460058	0	0	0	0	0	0
ENSMUSG00000107394	1700012J15Rik	RIKEN cDNA 1700012J15 gene [Source:MGI Symbol;Acc:MGI:1922737]	6	471	0.503185	0	0	0	0	0	0
ENSMUSG00000103545	1700012J22Rik	RIKEN cDNA 1700012J22 gene [Source:MGI Symbol;Acc:MGI:1922746]	13	830	0.480723	0	0	0	0	0	0
ENSMUSG00000028589	1700012P22Rik	RIKEN cDNA 1700012P22 gene [Source:MGI Symbol;Acc:MGI:1916614]	4	974	0.4846	0	0	0	0	0	0
ENSMUSG00000106899	1700013A02Rik	RIKEN cDNA 1700013A02 gene [Source:MGI Symbol;Acc:MGI:1916616]	5	645	0.429457	0	0	0	0	0	0
ENSMUSG00000079346	1700013D24Rik	RIKEN cDNA 1700013D24 gene [Source:MGI Symbol;Acc:MGI:1924171]	6	513	0.465887	0	0	0	0	0	0
ENSMUSG00000027886	1700013F07Rik	RIKEN cDNA 1700013F07 gene [Source:MGI Symbol;Acc:MGI:1922754]	3	1452	0.473829	0	4	0	0	0	6
ENSMUSG00000041399	1700013G24Rik	RIKEN cDNA 1700013G24 gene [Source:MGI Symbol;Acc:MGI:1916630]	4	1048	0.563931	0	1	0	0	0	0
ENSMUSG00000054727	1700013H16Rik	RIKEN cDNA 1700013H16 gene [Source:MGI Symbol;Acc:MGI:1922764]	X	1224	0.420752	0	0	0	0	0	0
ENSMUSG00000106586	1700013M08Rik	RIKEN cDNA 1700013M08 gene [Source:MGI Symbol;Acc:MGI:1922755]	5	1481	0.456448	0	0	0	0	0	0
ENSMUSG00000085801	1700013N06Rik	RIKEN cDNA 1700013N06 gene [Source:MGI Symbol;Acc:MGI:1922884]	12	663	0.46908	0	0	0	0	0	0
ENSMUSG00000118578	1700014B07Rik	RIKEN cDNA 1700014B07 gene [Source:MGI Symbol;Acc:MGI:1919498]	2	818	0.718826	5	1	4	2	0	0
ENSMUSG00000051054	1700014D04Rik	RIKEN cDNA 1700014D04 gene [Source:MGI Symbol;Acc:MGI:1921474]	13	3281	0.497409	0	10	0	0	1	1
ENSMUSG00000105903	1700014F14Rik	RIKEN cDNA 1700014F14 gene [Source:MGI Symbol;Acc:MGI:1924172]	5	197	0.426396	0	0	0	0	0	0
ENSMUSG00000110056	1700014L14Rik	RIKEN cDNA 1700014L14 gene [Source:MGI Symbol;Acc:MGI:1924173]	8	481	0.376299	0	0	0	0	0	0
ENSMUSG00000113696	1700015C15Rik	RIKEN cDNA 1700015C15 gene [Source:MGI Symbol;Acc:MGI:1922782]	13	374	0.44385	9	0	0	0	0	2
ENSMUSG00000104908	1700015C17Rik	RIKEN cDNA 1700015C17 gene [Source:MGI Symbol;Acc:MGI:1924178]	3	239	0.485356	0	2	0	5	11	0
ENSMUSG00000094445	1700015G11Rik	RIKEN cDNA 1700015G11 gene [Source:MGI Symbol;Acc:MGI:1922779]	7	397	0.463476	0	0	0	0	0	0
ENSMUSG00000115761	1700015H07Rik	RIKEN cDNA 1700015H07 gene [Source:MGI Symbol;Acc:MGI:1922777]	15	560	0.398214	0	0	0	0	0	0
ENSMUSG00000110335	1700015I17Rik	RIKEN cDNA 1700015I17 gene [Source:MGI Symbol;Acc:MGI:1922784]	8	2099	0.474988	0	0	0	0	0	0
ENSMUSG00000097671	1700015O11Rik	RIKEN cDNA 1700015O11 gene [Source:MGI Symbol;Acc:MGI:1919105]	6	678	0.510324	0	0	0	0	0	0
ENSMUSG00000102737	1700016A09Rik	RIKEN cDNA 1700016A09 gene [Source:MGI Symbol;Acc:MGI:1921477]	8	835	0.677844	27	0	0	0	15	0
ENSMUSG00000104538	1700016B01Rik	RIKEN cDNA 1700016B01 gene [Source:MGI Symbol;Acc:MGI:1922890]	5	270	0.555556	0	0	0	0	0	0
ENSMUSG00000108979	1700016B15Rik	RIKEN cDNA 1700016B15 gene [Source:MGI Symbol;Acc:MGI:1916677]	7	733	0.555252	1	2	1	6	4	0
ENSMUSG00000015962	1700016C15Rik	RIKEN cDNA 1700016C15 gene [Source:MGI Symbol;Acc:MGI:1916678]	1	768	0.458333	0	0	1	0	0	0
ENSMUSG00000031509	1700016D06Rik	RIKEN cDNA 1700016D06 gene [Source:MGI Symbol;Acc:MGI:1923663]	8	1612	0.453474	0	0	0	3	0	2
ENSMUSG00000103481	1700016D08Rik	RIKEN cDNA 1700016D08 gene [Source:MGI Symbol;Acc:MGI:1925627]	16	368	0.595109	0	1	0	1	1	0
ENSMUSG00000104955	1700016F12Rik	RIKEN cDNA 1700016F12 gene [Source:MGI Symbol;Acc:MGI:1916674]	5	655	0.433588	0	0	0	0	0	0
ENSMUSG00000100625	1700016G22Rik	RIKEN cDNA 1700016G22 gene [Source:MGI Symbol;Acc:MGI:1919117]	13	740	0.462162	0	0	0	0	0	0
ENSMUSG00000114673	1700016H03Rik	RIKEN cDNA 1700016H03 gene [Source:MGI Symbol;Acc:MGI:1922903]	19	437	0.508009	0	0	0	0	0	0
ENSMUSG00000029320	1700016H13Rik	RIKEN cDNA 1700016H13 gene [Source:MGI Symbol;Acc:MGI:1921468]	5	1751	0.49743	2	2	0	0	6	0
ENSMUSG00000111103	1700016J18Rik	RIKEN cDNA 1700016J18 gene [Source:MGI Symbol;Acc:MGI:1922811]	10	249	0.481928	5	9	1	0	1	3
ENSMUSG00000114563	1700016K05Rik	RIKEN cDNA 1700016K05 gene [Source:MGI Symbol;Acc:MGI:1922794]	17	386	0.42487	0	0	0	0	0	0
ENSMUSG00000053783	1700016K19Rik	RIKEN cDNA 1700016K19 gene [Source:MGI Symbol;Acc:MGI:1921480]	11	921	0.571118	0	0	0	0	0	0
ENSMUSG00000101483	1700016L21Rik	RIKEN cDNA 1700016L21 gene [Source:MGI Symbol;Acc:MGI:1919458]	1	968	0.427686	0	0	0	0	0	0
ENSMUSG00000085609	1700016P03Rik	RIKEN cDNA 1700016P03 gene [Source:MGI Symbol;Acc:MGI:1922792]	11	863	0.464658	3	2	0	3	5	0
ENSMUSG00000101894	1700016P04Rik	RIKEN cDNA 1700016P04 gene [Source:MGI Symbol;Acc:MGI:1916663]	6	429	0.41958	0	0	0	0	0	0
ENSMUSG00000032300	1700017B05Rik	RIKEN cDNA 1700017B05 gene [Source:MGI Symbol;Acc:MGI:1921461]	9	5235	0.572875	203	227	212	185	220	157
ENSMUSG00000037884	1700017G19Rik	RIKEN cDNA 1700017G19 gene [Source:MGI Symbol;Acc:MGI:1919477]	3	2904	0.455923	0	0	0	0	0	0
ENSMUSG00000098727	1700017I07Rik	RIKEN cDNA 1700017I07 gene [Source:MGI Symbol;Acc:MGI:1922756]	9	462	0.495671	0	3	0	0	0	0
ENSMUSG00000086348	1700017J07Rik	RIKEN cDNA 1700017J07 gene [Source:MGI Symbol;Acc:MGI:1922758]	2	473	0.501057	0	0	0	0	0	0
ENSMUSG00000107232	1700017L05Rik	RIKEN cDNA 1700017L05 gene [Source:MGI Symbol;Acc:MGI:1916620]	5	558	0.523297	0	0	0	0	0	0
ENSMUSG00000105651	1700017M07Rik	RIKEN cDNA 1700017M07 gene [Source:MGI Symbol;Acc:MGI:1923648]	3	940	0.489362	0	0	0	0	0	0
ENSMUSG00000056912	1700017N19Rik	RIKEN cDNA 1700017N19 gene [Source:MGI Symbol;Acc:MGI:1913855]	10	2353	0.399915	0	0	2	0	0	0
ENSMUSG00000038408	1700018A04Rik	RIKEN cDNA 1700018A04 gene [Source:MGI Symbol;Acc:MGI:1916631]	13	4216	0.533207	0	0	0	0	0	0
ENSMUSG00000103616	1700018A14Rik	RIKEN cDNA 1700018A14 gene [Source:MGI Symbol;Acc:MGI:1916641]	18	711	0.601969	0	0	0	3	0	0
ENSMUSG00000107368	1700018A23Rik	RIKEN cDNA 1700018A23 gene [Source:MGI Symbol;Acc:MGI:1919481]	6	398	0.525126	7	3	0	1	1	2
ENSMUSG00000031809	1700018B08Rik	RIKEN cDNA 1700018B08 gene [Source:MGI Symbol;Acc:MGI:1923655]	8	1294	0.572643	0	0	0	2	0	0
ENSMUSG00000037910	1700018B24Rik	RIKEN cDNA 1700018B24 gene [Source:MGI Symbol;Acc:MGI:1913582]	3	593	0.487352	0	0	0	0	0	0
ENSMUSG00000029620	1700018F24Rik	RIKEN cDNA 1700018F24 gene [Source:MGI Symbol;Acc:MGI:1916646]	5	1122	0.475045	0	0	0	0	0	0
ENSMUSG00000109745	1700018G05Rik	RIKEN cDNA 1700018G05 gene [Source:MGI Symbol;Acc:MGI:1916638]	X	386	0.554404	0	0	0	0	0	0
ENSMUSG00000100075	1700018L02Rik	RIKEN cDNA 1700018L02 gene [Source:MGI Symbol;Acc:MGI:1914579]	19	2485	0.51992	3	4	1	13	20	8
ENSMUSG00000046145	1700018M17Rik	RIKEN cDNA 1700018M17 gene [Source:MGI Symbol;Acc:MGI:1919495]	4	456	0.756579	0	4	0	0	0	0
ENSMUSG00000110709	1700018P08Rik	RIKEN cDNA 1700018P08 gene [Source:MGI Symbol;Acc:MGI:1920580]	8	1239	0.447942	0	0	0	0	0	0
ENSMUSG00000060715	1700019A02Rik	RIKEN cDNA 1700019A02 gene [Source:MGI Symbol;Acc:MGI:1916647]	1	777	0.397683	2	6	1	0	3	4
ENSMUSG00000109102	1700019A23Rik	RIKEN cDNA 1700019A23 gene [Source:MGI Symbol;Acc:MGI:1915470]	7	196	0.545918	0	0	0	0	0	0
ENSMUSG00000113770	1700019C18Rik	RIKEN cDNA 1700019C18 gene [Source:MGI Symbol;Acc:MGI:1922793]	13	2633	0.472465	0	0	0	0	0	0
ENSMUSG00000043629	1700019D03Rik	RIKEN cDNA 1700019D03 gene [Source:MGI Symbol;Acc:MGI:1914330]	1	4330	0.425404	5	18	9	12	0	5
ENSMUSG00000086202	1700019E08Rik	RIKEN cDNA 1700019E08 gene [Source:MGI Symbol;Acc:MGI:1916655]	2	830	0.431325	0	0	0	0	0	0
ENSMUSG00000107027	1700019F05Rik	RIKEN cDNA 1700019F05 gene [Source:MGI Symbol;Acc:MGI:1916652]	5	533	0.467167	0	0	0	0	0	0
ENSMUSG00000085416	1700019G24Rik	RIKEN cDNA 1700019G24 gene [Source:MGI Symbol;Acc:MGI:1919499]	6	503	0.45328	0	0	0	0	0	0
ENSMUSG00000111489	1700019J19Rik	RIKEN cDNA 1700019J19 gene [Source:MGI Symbol;Acc:MGI:1923662]	9	5324	0.461119	1	0	0	0	1	3
ENSMUSG00000111639	1700019L13Rik	RIKEN cDNA 1700019L13 gene [Source:MGI Symbol;Acc:MGI:1919476]	9	4947	0.554073	0	1	0	2	0	0
ENSMUSG00000059695	1700019M22Rik	RIKEN cDNA 1700019M22 gene [Source:MGI Symbol;Acc:MGI:1916673]	12	354	0.446328	0	0	0	0	0	0
ENSMUSG00000026931	1700019N19Rik	RIKEN cDNA 1700019N19 gene [Source:MGI Symbol;Acc:MGI:1914757]	19	1257	0.5179	2	0	0	0	0	0
ENSMUSG00000099808	1700019P21Rik	RIKEN cDNA 1700019P21 gene [Source:MGI Symbol;Acc:MGI:1922796]	1	411	0.459854	0	0	0	0	0	0
ENSMUSG00000027409	1700020A23Rik	RIKEN cDNA 1700020A23 gene [Source:MGI Symbol;Acc:MGI:1922906]	2	739	0.568336	0	0	0	0	0	0
ENSMUSG00000113628	1700020D12Rik	RIKEN cDNA 1700020D12 gene [Source:MGI Symbol;Acc:MGI:1916687]	12	426	0.478873	0	0	0	0	0	0
ENSMUSG00000110052	1700020G03Rik	RIKEN cDNA 1700020G03 gene [Source:MGI Symbol;Acc:MGI:1921485]	8	889	0.618673	0	0	3	0	0	0
ENSMUSG00000101801	1700020G17Rik	RIKEN cDNA 1700020G17 gene [Source:MGI Symbol;Acc:MGI:1922880]	10	1476	0.466802	0	0	0	0	0	0
ENSMUSG00000013928	1700020L13Rik	RIKEN cDNA 1700020L13 gene [Source:MGI Symbol;Acc:MGI:1922879]	7	2432	0.538651	7	4	3	8	2	0
ENSMUSG00000035085	1700020L24Rik	RIKEN cDNA 1700020L24 gene [Source:MGI Symbol;Acc:MGI:1913580]	11	1050	0.6	0	0	0	0	6	0
ENSMUSG00000100146	1700020M21Rik	RIKEN cDNA 1700020M21 gene [Source:MGI Symbol;Acc:MGI:1923652]	9	644	0.462733	0	0	0	0	0	0
ENSMUSG00000050844	1700020N01Rik	RIKEN cDNA 1700020N01 gene [Source:MGI Symbol;Acc:MGI:1914942]	10	1136	0.46743	5	3	2	1	1	17
ENSMUSG00000059690	1700020N15Rik	RIKEN cDNA 1700020N15 gene [Source:MGI Symbol;Acc:MGI:1922759]	X	525	0.43619	0	0	0	0	0	0
ENSMUSG00000100253	1700020N18Rik	RIKEN cDNA 1700020N18 gene [Source:MGI Symbol;Acc:MGI:1914336]	1	547	0.557587	0	0	0	0	0	0
ENSMUSG00000037535	1700021A07Rik	RIKEN cDNA 1700021A07 gene [Source:MGI Symbol;Acc:MGI:1924174]	10	721	0.493759	0	0	0	0	0	0
ENSMUSG00000105426	1700021F02Rik	RIKEN cDNA 1700021F02 gene [Source:MGI Symbol;Acc:MGI:1922769]	5	350	0.477143	0	0	0	0	0	0
ENSMUSG00000027518	1700021F07Rik	RIKEN cDNA 1700021F07 gene [Source:MGI Symbol;Acc:MGI:1919471]	2	646	0.547988	0	0	0	0	0	0
ENSMUSG00000107053	1700021F13Rik	RIKEN cDNA 1700021F13 gene [Source:MGI Symbol;Acc:MGI:1924176]	5	549	0.468124	0	0	0	0	0	0
ENSMUSG00000112387	1700021G15Rik	RIKEN cDNA 1700021G15 gene [Source:MGI Symbol;Acc:MGI:1920506]	10	528	0.443182	0	0	0	0	0	0
ENSMUSG00000086890	1700021J08Rik	RIKEN cDNA 1700021J08 gene [Source:MGI Symbol;Acc:MGI:1919485]	4	575	0.575652	0	0	0	0	0	0
ENSMUSG00000086955	1700021L23Rik	RIKEN cDNA 1700021L23 gene [Source:MGI Symbol;Acc:MGI:1923660]	4	726	0.506887	0	0	0	0	0	0
ENSMUSG00000087343	1700021N21Rik	RIKEN cDNA 1700021N21 gene [Source:MGI Symbol;Acc:MGI:1916659]	4	904	0.522124	5	2	0	3	0	0
ENSMUSG00000096796	1700021P04Rik	RIKEN cDNA 1700021P04 gene [Source:MGI Symbol;Acc:MGI:1922771]	19	659	0.497724	0	0	0	0	0	0
ENSMUSG00000038165	1700022A21Rik	RIKEN cDNA 1700022A21 gene [Source:MGI Symbol;Acc:MGI:1919502]	5	1448	0.535221	0	0	0	0	0	0
ENSMUSG00000099751	1700022A22Rik	RIKEN cDNA 1700022A22 gene [Source:MGI Symbol;Acc:MGI:1922807]	15	1507	0.436629	0	0	0	0	0	0
ENSMUSG00000099983	1700022E09Rik	RIKEN cDNA 1700022E09 gene [Source:MGI Symbol;Acc:MGI:1922886]	16	666	0.403904	0	0	0	0	0	5
ENSMUSG00000112581	1700022H01Rik	RIKEN cDNA 1700022H01 gene [Source:MGI Symbol;Acc:MGI:1922789]	10	387	0.542636	0	0	0	0	0	0
ENSMUSG00000099360	1700022H16Rik	RIKEN cDNA 1700022H16 gene [Source:MGI Symbol;Acc:MGI:1916670]	12	476	0.468487	0	0	0	0	0	0
ENSMUSG00000028451	1700022I11Rik	RIKEN cDNA 1700022I11 gene [Source:MGI Symbol;Acc:MGI:1914567]	4	4542	0.484808	1	5	8	4	8	1
ENSMUSG00000097523	1700022N22Rik	RIKEN cDNA 1700022N22 gene [Source:MGI Symbol;Acc:MGI:1916681]	17	1632	0.536152	0	3	5	5	10	4
ENSMUSG00000117050	1700023B13Rik	RIKEN cDNA 1700023B13 gene [Source:MGI Symbol;Acc:MGI:1920529]	17	1046	0.594646	0	0	0	0	0	0
ENSMUSG00000087393	1700023C21Rik	RIKEN cDNA 1700023C21 gene [Source:MGI Symbol;Acc:MGI:1920507]	11	389	0.44473	0	0	0	0	0	0
ENSMUSG00000100000	1700023F02Rik	RIKEN cDNA 1700023F02 gene [Source:MGI Symbol;Acc:MGI:1916683]	10	767	0.440678	7	0	2	0	0	0
ENSMUSG00000103503	1700023G09Rik	RIKEN cDNA 1700023G09 gene [Source:MGI Symbol;Acc:MGI:1920531]	1	1460	0.410959	0	0	0	0	0	0
ENSMUSG00000089827	1700023H06Rik	RIKEN cDNA 1700023H06 gene [Source:MGI Symbol;Acc:MGI:1916692]	13	1044	0.429119	1	0	0	0	4	0
ENSMUSG00000052334	1700024B05Rik	RIKEN cDNA 1700024B05 gene [Source:MGI Symbol;Acc:MGI:1922768]	14	1576	0.410533	0	0	0	0	0	0
ENSMUSG00000099994	1700024B18Rik	RIKEN cDNA 1700024B18 gene [Source:MGI Symbol;Acc:MGI:1916643]	14	423	0.434988	0	0	0	0	0	0
ENSMUSG00000072473	1700024G13Rik	RIKEN cDNA 1700024G13 gene [Source:MGI Symbol;Acc:MGI:1914335]	14	850	0.501176	0	0	0	0	0	0
ENSMUSG00000113825	1700024I08Rik	RIKEN cDNA 1700024I08 gene [Source:MGI Symbol;Acc:MGI:1922772]	13	984	0.438008	0	0	0	0	0	0
ENSMUSG00000069890	1700024J04Rik	RIKEN cDNA 1700024J04 gene [Source:MGI Symbol;Acc:MGI:1919098]	11	1821	0.449204	0	0	0	0	0	0
ENSMUSG00000106947	1700025A08Rik	RIKEN cDNA 1700025A08 gene [Source:MGI Symbol;Acc:MGI:1916650]	5	609	0.625616	0	0	0	0	0	0
ENSMUSG00000101113	1700025B11Rik	RIKEN cDNA 1700025B11 gene [Source:MGI Symbol;Acc:MGI:1923659]	15	553	0.455696	0	0	0	0	0	0
ENSMUSG00000078935	1700025C18Rik	RIKEN cDNA 1700025C18 gene [Source:MGI Symbol;Acc:MGI:1919461]	2	702	0.539886	0	0	0	0	0	0
ENSMUSG00000086760	1700025D23Rik	RIKEN cDNA 1700025D23 gene [Source:MGI Symbol;Acc:MGI:1916667]	11	846	0.481087	4	0	0	0	0	0
ENSMUSG00000100558	1700025F24Rik	RIKEN cDNA 1700025F24 gene [Source:MGI Symbol;Acc:MGI:1914331]	10	894	0.473154	0	0	0	0	0	0
ENSMUSG00000032666	1700025G04Rik	RIKEN cDNA 1700025G04 gene [Source:MGI Symbol;Acc:MGI:1916649]	1	11788	0.453936	852	1081	909	1010	959	938
ENSMUSG00000101888	1700025H01Rik	RIKEN cDNA 1700025H01 gene [Source:MGI Symbol;Acc:MGI:1922781]	16	547	0.548446	0	0	0	0	0	0
ENSMUSG00000108409	1700025J12Rik	RIKEN cDNA 1700025J12 gene [Source:MGI Symbol;Acc:MGI:1916657]	7	630	0.503175	0	0	0	0	0	0
ENSMUSG00000112482	1700025K04Rik	RIKEN cDNA 1700025K04 gene [Source:MGI Symbol;Acc:MGI:1913584]	10	1174	0.402896	0	0	0	0	0	0
ENSMUSG00000099747	1700025K24Rik	RIKEN cDNA 1700025K24 gene [Source:MGI Symbol;Acc:MGI:1916668]	17	740	0.439189	0	0	0	0	0	0
ENSMUSG00000109962	1700025L06Rik	RIKEN cDNA 1700025L06 gene [Source:MGI Symbol;Acc:MGI:1914183]	7	2169	0.537114	0	0	0	0	0	1
ENSMUSG00000100175	1700025M24Rik	RIKEN cDNA 1700025M24 gene [Source:MGI Symbol;Acc:MGI:1919526]	5	772	0.487047	0	0	0	0	0	0
ENSMUSG00000090200	1700025N21Rik	RIKEN cDNA 1700025N21 gene [Source:MGI Symbol;Acc:MGI:1916665]	10	686	0.504373	0	0	0	0	1	0
ENSMUSG00000100121	1700025N23Rik	RIKEN cDNA 1700025N23 gene [Source:MGI Symbol;Acc:MGI:1917236]	6	915	0.500546	0	0	0	0	0	0
ENSMUSG00000028244	1700025O08Rik	RIKEN cDNA 1700025O08 gene [Source:MGI Symbol;Acc:MGI:1917234]	4	456	0.394737	0	0	0	0	0	0
ENSMUSG00000086379	1700026D11Rik	RIKEN cDNA 1700026D11 gene [Source:MGI Symbol;Acc:MGI:1917621]	2	2929	0.499829	0	0	0	0	0	0
ENSMUSG00000101854	1700026F02Rik	RIKEN cDNA 1700026F02 gene [Source:MGI Symbol;Acc:MGI:1916669]	8	1679	0.472901	2	1	0	0	6	0
ENSMUSG00000073976	1700026J12Rik	RIKEN cDNA 1700026J12 gene [Source:MGI Symbol;Acc:MGI:1920505]	16	1155	0.404329	0	0	0	0	0	0
ENSMUSG00000097716	1700026J14Rik	RIKEN cDNA 1700026J14 gene [Source:MGI Symbol;Acc:MGI:1916682]	6	794	0.518892	1	3	7	0	0	6
ENSMUSG00000114681	1700026N04Rik	RIKEN cDNA 1700026N04 gene [Source:MGI Symbol;Acc:MGI:1919521]	13	643	0.589425	4	4	2	8	1	0
ENSMUSG00000084864	1700027A07Rik	RIKEN cDNA 1700027A07 gene [Source:MGI Symbol;Acc:MGI:1917246]	15	458	0.5	0	0	0	0	0	0
ENSMUSG00000101968	1700027A15Rik	RIKEN cDNA 1700027A15 gene [Source:MGI Symbol;Acc:MGI:1916699]	1	1396	0.482808	0	1	0	0	0	1
ENSMUSG00000107737	1700027F06Rik	RIKEN cDNA 1700027F06 gene [Source:MGI Symbol;Acc:MGI:1919518]	6	243	0.506173	0	0	0	0	0	0
ENSMUSG00000100911	1700027F09Rik	RIKEN cDNA 1700027F09 gene [Source:MGI Symbol;Acc:MGI:1917249]	5	767	0.436767	0	0	0	0	0	0
ENSMUSG00000100799	1700027H10Rik	RIKEN cDNA 1700027H10 gene [Source:MGI Symbol;Acc:MGI:1919524]	3	584	0.421233	0	0	0	0	0	0
ENSMUSG00000098304	1700027I24Rik	RIKEN cDNA 1700027I24 gene [Source:MGI Symbol;Acc:MGI:1922817]	9	696	0.395115	1	0	0	0	0	0
ENSMUSG00000111422	1700027J07Rik	RIKEN cDNA 1700027J07 gene [Source:MGI Symbol;Acc:MGI:1916693]	10	2782	0.489216	0	0	0	0	0	0
ENSMUSG00000099417	1700028B04Rik	RIKEN cDNA 1700028B04 gene [Source:MGI Symbol;Acc:MGI:1917251]	7	971	0.54171	0	0	0	0	0	0
ENSMUSG00000101683	1700028D13Rik	RIKEN cDNA 1700028D13 gene [Source:MGI Symbol;Acc:MGI:1922819]	5	718	0.523677	0	0	0	0	0	0
ENSMUSG00000097321	1700028E10Rik	RIKEN cDNA 1700028E10 gene [Source:MGI Symbol;Acc:MGI:1916713]	5	6927	0.4507	49	47	51	28	50	29
ENSMUSG00000056821	1700028I16Rik	RIKEN cDNA 1700028I16 gene [Source:MGI Symbol;Acc:MGI:1917253]	10	1056	0.534091	0	0	0	0	0	0
ENSMUSG00000038782	1700028J19Rik	RIKEN cDNA 1700028J19 gene [Source:MGI Symbol;Acc:MGI:1917254]	7	2471	0.503035	0	4	0	7	3	3
ENSMUSG00000089798	1700028K03Rik	RIKEN cDNA 1700028K03 gene [Source:MGI Symbol;Acc:MGI:1923671]	5	7963	0.402612	3	4	8	0	14	0
ENSMUSG00000101334	1700028M03Rik	RIKEN cDNA 1700028M03 gene [Source:MGI Symbol;Acc:MGI:1916710]	3	476	0.468487	0	0	0	0	0	0
ENSMUSG00000078635	1700028N14Rik	RIKEN cDNA 1700028N14 gene [Source:MGI Symbol;Acc:MGI:1920530]	11	747	0.570281	1	21	16	1	8	6
ENSMUSG00000033053	1700028P14Rik	RIKEN cDNA 1700028P14 gene [Source:MGI Symbol;Acc:MGI:1914733]	19	875	0.460571	0	0	0	0	0	0
ENSMUSG00000086823	1700028P15Rik	RIKEN cDNA 1700028P15 gene [Source:MGI Symbol;Acc:MGI:1922905]	2	3553	0.449761	0	0	0	0	0	0
ENSMUSG00000100759	1700029B22Rik	RIKEN cDNA 1700029B22 gene [Source:MGI Symbol;Acc:MGI:1916745]	7	699	0.484979	0	0	0	0	0	0
ENSMUSG00000102834	1700029B24Rik	RIKEN cDNA 1700029B24 gene [Source:MGI Symbol;Acc:MGI:1919533]	3	497	0.444668	0	0	0	0	0	0
ENSMUSG00000100557	1700029E06Rik	RIKEN cDNA 1700029E06 gene [Source:MGI Symbol;Acc:MGI:1919500]	5	757	0.418758	0	0	0	0	0	0
ENSMUSG00000052075	1700029F12Rik	RIKEN cDNA 1700029F12 gene [Source:MGI Symbol;Acc:MGI:1913729]	13	1140	0.504386	2	0	0	0	0	0
ENSMUSG00000031452	1700029H14Rik	RIKEN cDNA 1700029H14 gene [Source:MGI Symbol;Acc:MGI:1913751]	8	1421	0.546094	11	0	0	0	2	0
ENSMUSG00000044916	1700029I15Rik	RIKEN cDNA 1700029I15 gene [Source:MGI Symbol;Acc:MGI:1916742]	2	1348	0.549703	7	1	9	4	21	0
ENSMUSG00000099968	1700029J03Rik	RIKEN cDNA 1700029J03 gene [Source:MGI Symbol;Acc:MGI:1919514]	16	1527	0.499673	0	0	0	0	0	0
ENSMUSG00000071103	1700029J07Rik	RIKEN cDNA 1700029J07 gene [Source:MGI Symbol;Acc:MGI:1916729]	8	3006	0.452096	81	114	107	76	89	34
ENSMUSG00000101189	1700029M03Rik	RIKEN cDNA 1700029M03 gene [Source:MGI Symbol;Acc:MGI:1916726]	1	685	0.414599	0	0	0	0	0	0
ENSMUSG00000086788	1700029M20Rik	RIKEN cDNA 1700029M20 gene [Source:MGI Symbol;Acc:MGI:1913597]	4	3024	0.503307	0	0	0	0	0	0
ENSMUSG00000098144	1700029N11Rik	RIKEN cDNA 1700029N11 gene [Source:MGI Symbol;Acc:MGI:1916741]	13	1248	0.463942	0	0	0	0	0	0
ENSMUSG00000085333	1700030A11Rik	RIKEN cDNA 1700030A11 gene [Source:MGI Symbol;Acc:MGI:1921429]	17	888	0.488739	0	0	0	0	0	0
ENSMUSG00000099759	1700030C10Rik	RIKEN cDNA 1700030C10 gene [Source:MGI Symbol;Acc:MGI:1916763]	12	1735	0.536599	25	102	40	16	11	18
ENSMUSG00000091071	1700030C10Rik	RIKEN cDNA 1700030C10 gene [Source:MGI Symbol;Acc:MGI:1916763]	12	1471	0.586676	25	21	9	9	17	1
ENSMUSG00000086459	1700030C12Rik	RIKEN cDNA 1700030C12 gene [Source:MGI Symbol;Acc:MGI:1919496]	11	1169	0.457656	0	3	0	0	0	2
ENSMUSG00000087148	1700030C14Rik	RIKEN cDNA 1700030C14 gene [Source:MGI Symbol;Acc:MGI:1922912]	2	756	0.531746	0	0	0	0	0	0
ENSMUSG00000112619	1700030E10Rik	RIKEN cDNA 1700030E10 gene [Source:MGI Symbol;Acc:MGI:1916765]	10	721	0.474341	0	0	0	0	0	0
ENSMUSG00000099869	1700030F04Rik	RIKEN cDNA 1700030F04 gene [Source:MGI Symbol;Acc:MGI:1919513]	6	802	0.478803	0	0	0	0	0	0
ENSMUSG00000103387	1700030I03Rik	RIKEN cDNA 1700030I03 gene [Source:MGI Symbol;Acc:MGI:1916753]	12	942	0.485138	15	0	7	0	0	3
ENSMUSG00000031847	1700030J22Rik	RIKEN cDNA 1700030J22 gene [Source:MGI Symbol;Acc:MGI:1916778]	8	2996	0.517023	31	14	14	42	34	46
ENSMUSG00000052794	1700030K09Rik	RIKEN cDNA 1700030K09 gene [Source:MGI Symbol;Acc:MGI:1919504]	8	2970	0.515488	50	50	85	79	97	65
ENSMUSG00000099508	1700030L20Rik	RIKEN cDNA 1700030L20 gene [Source:MGI Symbol;Acc:MGI:1917305]	3	985	0.434518	0	0	0	0	0	0
ENSMUSG00000113179	1700030L22Rik	RIKEN cDNA 1700030L22 gene [Source:MGI Symbol;Acc:MGI:1922826]	12	865	0.43237	0	0	0	0	0	0
ENSMUSG00000097424	1700030M09Rik	RIKEN cDNA 1700030M09 gene [Source:MGI Symbol;Acc:MGI:1919509]	8	1102	0.539927	0	0	0	0	0	0
ENSMUSG00000100969	1700030N03Rik	RIKEN cDNA 1700030N03 gene [Source:MGI Symbol;Acc:MGI:1917261]	19	5310	0.458569	0	0	0	0	0	0
ENSMUSG00000106800	1700030N18Rik	RIKEN cDNA 1700030N18 gene [Source:MGI Symbol;Acc:MGI:1917266]	5	966	0.494824	0	0	0	0	0	0
ENSMUSG00000100198	1700030O20Rik	RIKEN cDNA 1700030O20 gene [Source:MGI Symbol;Acc:MGI:1919536]	10	594	0.491582	4	0	0	0	0	0
ENSMUSG00000092239	1700031A10Rik	RIKEN cDNA 1700031A10 gene [Source:MGI Symbol;Acc:MGI:1920536]	17	656	0.492378	0	0	0	0	0	0
ENSMUSG00000032894	1700031F05Rik	RIKEN cDNA 1700031F05 gene [Source:MGI Symbol;Acc:MGI:1920550]	X	1444	0.488227	0	0	0	0	0	0
ENSMUSG00000047046	1700031F10Rik	RIKEN cDNA 1700031F10 gene [Source:MGI Symbol;Acc:MGI:1920567]	6	639	0.549296	1	0	0	0	0	0
ENSMUSG00000099863	1700031L13Rik	RIKEN cDNA 1700031L13 gene [Source:MGI Symbol;Acc:MGI:1914577]	5	960	0.361458	0	0	0	0	0	0
ENSMUSG00000099353	1700031M16Rik	RIKEN cDNA 1700031M16 gene [Source:MGI Symbol;Acc:MGI:1920552]	15	1666	0.455582	0	0	0	0	0	0
ENSMUSG00000100315	1700031P21Rik	RIKEN cDNA 1700031P21 gene [Source:MGI Symbol;Acc:MGI:1920528]	12	568	0.443662	0	0	0	0	0	0
ENSMUSG00000097302	1700034B16Rik	RIKEN cDNA 1700034B16 gene [Source:MGI Symbol;Acc:MGI:1920532]	18	722	0.51108	0	0	0	0	0	0
ENSMUSG00000024532	1700034E13Rik	RIKEN cDNA 1700034E13 gene [Source:MGI Symbol;Acc:MGI:1925664]	18	490	0.446939	0	0	0	0	0	0
ENSMUSG00000097962	1700034G24Rik	RIKEN cDNA 1700034G24 gene [Source:MGI Symbol;Acc:MGI:1914575]	5	1081	0.53284	0	0	0	0	0	0
ENSMUSG00000055833	1700034H15Rik	RIKEN cDNA 1700034H15 gene [Source:MGI Symbol;Acc:MGI:1921515]	1	6099	0.496475	10	16	29	11	26	9
ENSMUSG00000074619	1700034I23Rik	RIKEN cDNA 1700034I23 gene [Source:MGI Symbol;Acc:MGI:1920547]	3	2348	0.441227	0	0	0	0	0	0
ENSMUSG00000103287	1700034J04Rik	RIKEN cDNA 1700034J04 gene [Source:MGI Symbol;Acc:MGI:1920554]	12	750	0.492	0	0	0	0	0	0
ENSMUSG00000040163	1700034J05Rik	RIKEN cDNA 1700034J05 gene [Source:MGI Symbol;Acc:MGI:1920594]	6	3007	0.440306	6	0	0	0	0	0
ENSMUSG00000100294	1700034K08Rik	RIKEN cDNA 1700034K08 gene [Source:MGI Symbol;Acc:MGI:1925599]	9	824	0.436893	0	0	0	0	0	0
ENSMUSG00000097893	1700034P13Rik	RIKEN cDNA 1700034P13 gene [Source:MGI Symbol;Acc:MGI:1920581]	1	3101	0.501774	1	6	1	0	0	0
ENSMUSG00000095956	1700036A12Rik	RIKEN cDNA 1700036A12 gene [Source:MGI Symbol;Acc:MGI:1920548]	9	1828	0.502735	3	1	1	3	0	0
ENSMUSG00000099995	1700036G14Rik	RIKEN cDNA 1700036G14 gene [Source:MGI Symbol;Acc:MGI:1920533]	3	542	0.472325	0	0	0	0	0	0
ENSMUSG00000086185	1700036O09Rik	RIKEN cDNA 1700036O09 gene [Source:MGI Symbol;Acc:MGI:1920512]	X	349	0.346705	0	0	0	0	0	0
ENSMUSG00000085542	1700037C06Rik	RIKEN cDNA 1700037C06 gene [Source:MGI Symbol;Acc:MGI:1921513]	4	874	0.516018	0	0	0	0	0	0
ENSMUSG00000005983	1700037C18Rik	RIKEN cDNA 1700037C18 gene [Source:MGI Symbol;Acc:MGI:1920511]	16	3227	0.537031	2	13	8	6	8	8
ENSMUSG00000114125	1700037F03Rik	RIKEN cDNA 1700037F03 gene [Source:MGI Symbol;Acc:MGI:1914566]	13	365	0.463014	3	11	7	5	2	2
ENSMUSG00000027327	1700037H04Rik	RIKEN cDNA 1700037H04 gene [Source:MGI Symbol;Acc:MGI:1914576]	2	2286	0.552931	118	231	170	156	163	142
ENSMUSG00000092369	1700039E22Rik	RIKEN cDNA 1700039E22 gene [Source:MGI Symbol;Acc:MGI:1920572]	19	770	0.574026	0	0	0	0	0	0
ENSMUSG00000102536	1700039I01Rik	RIKEN cDNA 1700039I01 gene [Source:MGI Symbol;Acc:MGI:1920596]	1	479	0.592902	0	0	0	0	0	0
ENSMUSG00000097933	1700039M10Rik	RIKEN cDNA 1700039M10 gene [Source:MGI Symbol;Acc:MGI:1914768]	14	532	0.37594	0	0	0	0	0	0
ENSMUSG00000104086	1700039M15Rik	RIKEN cDNA 1700039M15 gene [Source:MGI Symbol;Acc:MGI:1921516]	9	1120	0.457143	0	0	0	0	0	0
ENSMUSG00000097515	1700040D17Rik	RIKEN cDNA 1700040D17 gene [Source:MGI Symbol;Acc:MGI:1923852]	3	998	0.435872	0	0	4	2	5	0
ENSMUSG00000113997	1700040E09Rik	RIKEN cDNA 1700040E09 gene [Source:MGI Symbol;Acc:MGI:1924240]	12	606	0.410891	0	0	0	0	0	0
ENSMUSG00000100667	1700040F15Rik	RIKEN cDNA 1700040F15 gene [Source:MGI Symbol;Acc:MGI:1920579]	Y	931	0.351235	0	0	0	0	0	0
ENSMUSG00000101568	1700040F17Rik	RIKEN cDNA 1700040F17 gene [Source:MGI Symbol;Acc:MGI:1920584]	15	817	0.423501	0	0	0	0	0	0
ENSMUSG00000103840	1700040K01Rik	RIKEN cDNA 1700040K01 gene [Source:MGI Symbol;Acc:MGI:1920517]	1	438	0.452055	0	0	0	0	0	0
ENSMUSG00000107406	1700040L08Rik	RIKEN cDNA 1700040L08 gene [Source:MGI Symbol;Acc:MGI:1920544]	6	541	0.441774	0	0	0	0	0	0
ENSMUSG00000116260	1700041B01Rik	RIKEN cDNA 1700041B01 gene [Source:MGI Symbol;Acc:MGI:1925873]	15	503	0.580517	0	0	0	0	0	0
ENSMUSG00000100282	1700041C23Rik	RIKEN cDNA 1700041C23 gene [Source:MGI Symbol;Acc:MGI:1914569]	9	395	0.379747	0	0	0	0	0	0
ENSMUSG00000054822	1700041G16Rik	RIKEN cDNA 1700041G16 gene [Source:MGI Symbol;Acc:MGI:1920549]	8	1824	0.501096	0	0	1	0	8	0
ENSMUSG00000104845	1700041I07Rik	RIKEN cDNA 1700041I07 gene [Source:MGI Symbol;Acc:MGI:1920523]	5	435	0.505747	0	0	0	0	0	0
ENSMUSG00000087010	1700041M05Rik	RIKEN cDNA 1700041M05 gene [Source:MGI Symbol;Acc:MGI:1920510]	4	306	0.493464	0	0	0	1	0	0
ENSMUSG00000100857	1700041M19Rik	RIKEN cDNA 1700041M19 gene [Source:MGI Symbol;Acc:MGI:1923851]	16	2947	0.425178	0	0	0	0	0	0
ENSMUSG00000105991	1700042D02Rik	RIKEN cDNA 1700042D02 gene [Source:MGI Symbol;Acc:MGI:1920587]	9	389	0.44473	0	0	0	0	0	0
ENSMUSG00000078593	1700042G07Rik	RIKEN cDNA 1700042G07 gene [Source:MGI Symbol;Acc:MGI:1914573]	4	385	0.574026	0	0	0	0	0	0
ENSMUSG00000087044	1700042G15Rik	RIKEN cDNA 1700042G15 gene [Source:MGI Symbol;Acc:MGI:1920599]	4	664	0.533133	0	0	0	0	0	0
ENSMUSG00000112878	1700042O05Rik	RIKEN cDNA 1700042O05 gene [Source:MGI Symbol;Acc:MGI:1920540]	10	584	0.40411	0	0	0	0	0	0
ENSMUSG00000086391	1700042O10Rik	RIKEN cDNA 1700042O10 gene [Source:MGI Symbol;Acc:MGI:1920571]	11	1075	0.466977	0	0	0	0	0	0
ENSMUSG00000099911	1700044C05Rik	RIKEN cDNA 1700044C05 gene [Source:MGI Symbol;Acc:MGI:1920556]	14	898	0.453229	0	0	0	0	0	0
ENSMUSG00000100297	1700044K03Rik	RIKEN cDNA 1700044K03 gene [Source:MGI Symbol;Acc:MGI:1914571]	18	377	0.408488	0	0	0	0	0	0
ENSMUSG00000078492	1700045H11Rik	RIKEN cDNA 1700045H11 gene [Source:MGI Symbol;Acc:MGI:1920598]	4	593	0.485666	0	0	0	0	0	0
ENSMUSG00000104526	1700045I11Rik	RIKEN cDNA 1700045I11 gene [Source:MGI Symbol;Acc:MGI:1920600]	4	493	0.602434	0	0	0	0	0	0
ENSMUSG00000085561	1700046C09Rik	RIKEN cDNA 1700046C09 gene [Source:MGI Symbol;Acc:MGI:1920557]	11	543	0.410681	0	0	0	0	0	0
ENSMUSG00000085437	1700047A11Rik	RIKEN cDNA 1700047A11 gene [Source:MGI Symbol;Acc:MGI:1923854]	8	821	0.439708	0	0	0	0	0	0
ENSMUSG00000115294	1700047E10Rik	RIKEN cDNA 1700047E10 gene [Source:MGI Symbol;Acc:MGI:1921578]	14	568	0.498239	0	0	0	0	0	0
ENSMUSG00000085549	1700047F07Rik	RIKEN cDNA 1700047F07 gene [Source:MGI Symbol;Acc:MGI:1920570]	4	1050	0.50381	0	1	0	0	0	0
ENSMUSG00000099349	1700047G03Rik	RIKEN cDNA 1700047G03 gene [Source:MGI Symbol;Acc:MGI:1920589]	15	1493	0.486269	0	0	0	0	0	0
ENSMUSG00000110717	1700047G07Rik	RIKEN cDNA 1700047G07 gene [Source:MGI Symbol;Acc:MGI:1920573]	8	902	0.44235	0	0	0	0	0	0
ENSMUSG00000087347	1700047K16Rik	RIKEN cDNA 1700047K16 gene [Source:MGI Symbol;Acc:MGI:1920585]	11	886	0.513544	0	0	8	0	0	0
ENSMUSG00000101762	1700047L14Rik	RIKEN cDNA 1700047L14 gene [Source:MGI Symbol;Acc:MGI:1920545]	5	511	0.418787	0	0	0	0	0	0
ENSMUSG00000100147	1700047M11Rik	RIKEN cDNA 1700047M11 gene [Source:MGI Symbol;Acc:MGI:1914580]	1	2846	0.455727	0	0	1	0	0	0
ENSMUSG00000102356	1700047N06Rik	RIKEN cDNA 1700047N06 gene [Source:MGI Symbol;Acc:MGI:1923853]	1	920	0.388043	0	0	0	0	0	0
ENSMUSG00000109594	1700047O18Rik	RIKEN cDNA 1700047O18 gene [Source:MGI Symbol;Acc:MGI:1920668]	7	743	0.429341	0	0	0	0	0	0
ENSMUSG00000105274	1700048F04Rik	RIKEN cDNA 1700048F04 gene [Source:MGI Symbol;Acc:MGI:1920646]	5	1064	0.460526	0	0	0	0	0	0
ENSMUSG00000085637	1700048M11Rik	RIKEN cDNA 1700048M11 gene [Source:MGI Symbol;Acc:MGI:1920636]	16	485	0.478351	5	0	0	0	0	0
ENSMUSG00000118016	1700048O14Rik	RIKEN cDNA 1700048O14 gene [Source:MGI Symbol;Acc:MGI:1920683]	19	521	0.424184	0	0	0	0	0	0
ENSMUSG00000043773	1700048O20Rik	RIKEN cDNA 1700048O20 gene [Source:MGI Symbol;Acc:MGI:1920637]	9	2099	0.45879	2	1	13	9	1	0
ENSMUSG00000112333	1700048P04Rik	RIKEN cDNA 1700048P04 gene [Source:MGI Symbol;Acc:MGI:1920605]	10	369	0.485095	0	0	0	0	0	0
ENSMUSG00000085077	1700049E15Rik	RIKEN cDNA 1700049E15 gene [Source:MGI Symbol;Acc:MGI:1920644]	6	1047	0.484241	0	0	0	0	0	0
ENSMUSG00000079271	1700049E17Rik1	RIKEN cDNA 1700049E17 gene, gene 1 [Source:MGI Symbol;Acc:MGI:1920665]	14	1761	0.375355	0	0	0	0	0	0
ENSMUSG00000090440	1700049E17Rik2	tandem duplication of RIKEN cDNA 1700049E17 gene, gene 2 [Source:MGI Symbol;Acc:MGI:3796510]	14	1757	0.376209	0	0	0	0	0	0
ENSMUSG00000101553	1700049E22Rik	RIKEN cDNA 1700049E22 gene [Source:MGI Symbol;Acc:MGI:1920645]	6	507	0.532544	0	0	0	0	0	0
ENSMUSG00000043859	1700049L16Rik	RIKEN cDNA 1700049L16 gene [Source:MGI Symbol;Acc:MGI:1920633]	10	543	0.500921	0	0	0	0	0	0
ENSMUSG00000086951	1700051A21Rik	RIKEN cDNA 1700051A21 gene [Source:MGI Symbol;Acc:MGI:1920616]	11	1800	0.536111	0	0	0	0	0	0
ENSMUSG00000108263	1700051K13Rik	RIKEN cDNA 1700051K13 gene [Source:MGI Symbol;Acc:MGI:1920602]	6	696	0.41092	0	0	0	0	0	0
ENSMUSG00000103341	1700051O22Rik	RIKEN cDNA 1700051O22 Gene [Source:MGI Symbol;Acc:MGI:3704315]	8	638	0.556426	0	0	0	0	0	0
ENSMUSG00000105297	1700052H01Rik	RIKEN cDNA 1700052H01 gene [Source:MGI Symbol;Acc:MGI:1920712]	3	1025	0.470244	0	0	0	0	0	0
ENSMUSG00000101912	1700052I22Rik	RIKEN cDNA 1700052I22 gene [Source:MGI Symbol;Acc:MGI:1914590]	12	379	0.46438	0	0	0	0	0	0
ENSMUSG00000099681	1700052K11Rik	RIKEN cDNA 1700052K11 gene [Source:MGI Symbol;Acc:MGI:1920681]	11	3708	0.488943	42	41	41	38	36	33
ENSMUSG00000099988	1700054A03Rik	RIKEN cDNA 1700054A03 gene [Source:MGI Symbol;Acc:MGI:1925707]	19	4290	0.47296	0	2	2	3	3	8
ENSMUSG00000097001	1700054K02Rik	RIKEN cDNA 1700054K02 gene [Source:MGI Symbol;Acc:MGI:1925600]	1	376	0.470745	0	0	0	0	0	0
ENSMUSG00000100219	1700054K19Rik	RIKEN cDNA 1700054K19 gene [Source:MGI Symbol;Acc:MGI:1914586]	6	452	0.45354	0	0	0	0	0	0
ENSMUSG00000085889	1700054M17Rik	RIKEN cDNA 1700054M17 gene [Source:MGI Symbol;Acc:MGI:1920608]	2	445	0.478652	0	0	0	0	0	0
ENSMUSG00000111753	1700054O05Rik	RIKEN cDNA 1700054O05 gene [Source:MGI Symbol;Acc:MGI:1920606]	10	555	0.502703	0	0	0	0	0	0
ENSMUSG00000104183	1700054O19Rik	RIKEN cDNA 1700054O19 gene [Source:MGI Symbol;Acc:MGI:1921522]	14	868	0.47235	7	3	5	1	1	8
ENSMUSG00000093616	1700055C04Rik	RIKEN cDNA 1700055C04 gene [Source:MGI Symbol;Acc:MGI:1920647]	9	355	0.549296	0	0	0	0	0	0
ENSMUSG00000070997	1700055D18Rik	RIKEN cDNA 1700055D18 gene [Source:MGI Symbol;Acc:MGI:1920655]	4	3720	0.49328	15	16	15	18	29	28
ENSMUSG00000044854	1700056E22Rik	RIKEN cDNA 1700056E22 gene [Source:MGI Symbol;Acc:MGI:1920613]	1	1272	0.628931	1	0	0	0	0	0
ENSMUSG00000084792	1700056N10Rik	RIKEN cDNA 1700056N10 gene [Source:MGI Symbol;Acc:MGI:1920642]	16	1043	0.471716	12	5	12	5	28	14
ENSMUSG00000074139	1700057G04Rik	RIKEN cDNA 1700057G04 gene [Source:MGI Symbol;Acc:MGI:1925709]	9	1974	0.448835	0	0	0	0	0	0
ENSMUSG00000084757	1700057H15Rik	RIKEN cDNA 1700057H15 gene [Source:MGI Symbol;Acc:MGI:1925710]	4	1252	0.515974	0	0	0	0	0	0
ENSMUSG00000086007	1700057H21Rik	RIKEN cDNA 1700057H21 gene [Source:MGI Symbol;Acc:MGI:1920625]	2	697	0.464849	0	0	0	0	0	0
ENSMUSG00000089636	1700058P15Rik	RIKEN cDNA 1700058P15 gene [Source:MGI Symbol;Acc:MGI:1920627]	7	413	0.479419	0	0	0	0	0	0
ENSMUSG00000086887	1700060C16Rik	RIKEN cDNA 1700060C16 gene [Source:MGI Symbol;Acc:MGI:1920675]	6	645	0.496124	0	0	0	0	0	0
ENSMUSG00000078957	1700060C20Rik	RIKEN cDNA 1700060C20 gene [Source:MGI Symbol;Acc:MGI:1920649]	2	605	0.52562	0	0	0	0	0	0
ENSMUSG00000084970	1700060J05Rik	RIKEN cDNA 1700060J05 gene [Source:MGI Symbol;Acc:MGI:1920641]	4	1060	0.471698	0	0	0	0	0	0
ENSMUSG00000099407	1700060O08Rik	RIKEN cDNA 1700060O08 gene [Source:MGI Symbol;Acc:MGI:1914585]	12	281	0.469751	0	0	0	0	6	0
ENSMUSG00000117966	1700061A03Rik	RIKEN cDNA 1700061A03 gene [Source:MGI Symbol;Acc:MGI:1920664]	19	455	0.536264	0	0	0	0	0	0
ENSMUSG00000102060	1700061E17Rik	RIKEN cDNA 1700061E17 gene [Source:MGI Symbol;Acc:MGI:3642196]	9	1067	0.499531	0	0	0	0	0	0
ENSMUSG00000085759	1700061E18Rik	RIKEN cDNA 1700061E18 gene [Source:MGI Symbol;Acc:MGI:1924241]	13	588	0.460884	0	0	0	0	0	0
ENSMUSG00000085580	1700061F12Rik	RIKEN cDNA 1700061F12 gene [Source:MGI Symbol;Acc:MGI:1920688]	2	876	0.438356	0	0	0	0	0	0
ENSMUSG00000084948	1700061H18Rik	RIKEN cDNA 1700061H18 gene [Source:MGI Symbol;Acc:MGI:1920711]	18	1081	0.398705	0	0	0	0	0	0
ENSMUSG00000028009	1700061I17Rik	RIKEN cDNA 1700061I17 gene [Source:MGI Symbol;Acc:MGI:1920612]	3	1962	0.448522	0	0	0	0	0	0
ENSMUSG00000086366	1700061J23Rik	RIKEN cDNA 1700061J23 gene [Source:MGI Symbol;Acc:MGI:1924243]	11	537	0.469274	0	0	0	0	0	0
ENSMUSG00000110464	1700061N14Rik	RIKEN cDNA 1700061N14 gene [Source:MGI Symbol;Acc:MGI:1920682]	8	463	0.479482	0	0	0	0	0	0
ENSMUSG00000114390	1700062C10Rik	RIKEN cDNA 1700062C10 gene [Source:MGI Symbol;Acc:MGI:1920690]	14	1659	0.414105	0	0	0	0	0	0
ENSMUSG00000100062	1700063A18Rik	RIKEN cDNA 1700063A18 gene [Source:MGI Symbol;Acc:MGI:1920704]	1	356	0.426966	0	0	0	0	0	0
ENSMUSG00000100837	1700063D05Rik	RIKEN cDNA 1700063D05 gene [Source:MGI Symbol;Acc:MGI:1925750]	9	1529	0.489209	0	0	0	0	0	0
ENSMUSG00000040657	1700063H04Rik	RIKEN cDNA 1700063H04 gene [Source:MGI Symbol;Acc:MGI:1921519]	6	817	0.501836	0	0	0	0	0	0
ENSMUSG00000099266	1700063H06Rik	RIKEN cDNA 1700063H06 gene [Source:MGI Symbol;Acc:MGI:1920614]	9	445	0.388764	0	0	0	0	0	0
ENSMUSG00000103463	1700063I16Rik	RIKEN cDNA 1700063I16 gene [Source:MGI Symbol;Acc:MGI:1925877]	1	611	0.481178	0	0	0	0	0	0
ENSMUSG00000117080	1700063J08Rik	RIKEN cDNA 1700063J08 gene [Source:MGI Symbol;Acc:MGI:1920700]	17	554	0.554152	0	0	3	2	6	13
ENSMUSG00000102036	1700063K16Rik	RIKEN cDNA 1700063K16 gene [Source:MGI Symbol;Acc:MGI:1923860]	16	1203	0.413965	0	0	0	0	0	0
ENSMUSG00000101978	1700063O14Rik	RIKEN cDNA 1700063O14 gene [Source:MGI Symbol;Acc:MGI:1920702]	5	492	0.457317	0	0	0	0	0	0
ENSMUSG00000082766	1700064H15Rik	RIKEN cDNA 1700064H15 gene [Source:MGI Symbol;Acc:MGI:1920674]	3	394	0.456853	0	0	0	0	0	0
ENSMUSG00000100681	1700064J06Rik	RIKEN cDNA 1700064J06 gene [Source:MGI Symbol;Acc:MGI:1920650]	10	386	0.476684	0	0	0	0	0	0
ENSMUSG00000100211	1700064M15Rik	RIKEN cDNA 1700064M15 gene [Source:MGI Symbol;Acc:MGI:1920707]	12	645	0.505426	0	0	1	0	0	0
ENSMUSG00000096655	1700065D16Rik	RIKEN cDNA 1700065D16 gene [Source:MGI Symbol;Acc:MGI:1920660]	9	2905	0.521859	3	2	0	0	0	3
ENSMUSG00000099435	1700065I16Rik	RIKEN cDNA 1700065I16 gene [Source:MGI Symbol;Acc:MGI:1925712]	15	997	0.560682	0	0	0	0	0	0
ENSMUSG00000107341	1700065J11Rik	RIKEN cDNA 1700065J11 gene [Source:MGI Symbol;Acc:MGI:1920659]	6	424	0.471698	0	0	0	0	0	0
ENSMUSG00000100872	1700065J18Rik	RIKEN cDNA 1700065J18 gene [Source:MGI Symbol;Acc:MGI:1920705]	1	393	0.483461	0	0	0	0	0	0
ENSMUSG00000107408	1700065L07Rik	RIKEN cDNA 1700065L07 gene [Source:MGI Symbol;Acc:MGI:1920658]	6	614	0.47557	0	0	0	0	0	0
ENSMUSG00000100134	1700065O20Rik	RIKEN cDNA 1700065O20 gene [Source:MGI Symbol;Acc:MGI:1923859]	18	710	0.412676	0	0	0	0	0	0
ENSMUSG00000101634	1700066B17Rik	RIKEN cDNA 1700066B17 gene [Source:MGI Symbol;Acc:MGI:1920676]	1	1068	0.465356	0	0	0	0	0	0
ENSMUSG00000073598	1700066B19Rik	RIKEN cDNA 1700066B19 gene [Source:MGI Symbol;Acc:MGI:1920699]	18	2837	0.542122	6	0	0	0	0	0
ENSMUSG00000101810	1700066C05Rik	RIKEN cDNA 1700066C05 gene [Source:MGI Symbol;Acc:MGI:1925904]	16	407	0.493857	0	0	0	0	0	0
ENSMUSG00000097717	1700066J03Rik	RIKEN cDNA 1700066J03 gene [Source:MGI Symbol;Acc:MGI:1914589]	13	850	0.502353	0	0	0	0	1	1
ENSMUSG00000038323	1700066M21Rik	RIKEN cDNA 1700066M21 gene [Source:MGI Symbol;Acc:MGI:1920717]	1	3235	0.411747	38	47	28	42	39	33
ENSMUSG00000099605	1700066N21Rik	RIKEN cDNA 1700066N21 gene [Source:MGI Symbol;Acc:MGI:1920721]	5	783	0.404853	0	0	0	0	0	0
ENSMUSG00000085800	1700066O22Rik	RIKEN cDNA 1700066O22 gene [Source:MGI Symbol;Acc:MGI:1920651]	18	2146	0.437558	0	0	0	0	0	0
ENSMUSG00000099378	1700067G17Rik	RIKEN cDNA 1700067G17 gene [Source:MGI Symbol;Acc:MGI:1920725]	1	603	0.475954	0	0	0	0	0	0
ENSMUSG00000046408	1700067K01Rik	RIKEN cDNA 1700067K01 gene [Source:MGI Symbol;Acc:MGI:1920703]	8	1957	0.586101	0	0	0	1	0	0
ENSMUSG00000021545	1700067P10Rik	RIKEN cDNA 1700067P10 gene [Source:MGI Symbol;Acc:MGI:1915474]	17	1437	0.506611	0	0	0	1	3	0
ENSMUSG00000053081	1700069B07Rik	RIKEN cDNA 1700069B07 gene [Source:MGI Symbol;Acc:MGI:1923863]	7	939	0.619808	0	0	3	0	0	0
ENSMUSG00000042184	1700069L16Rik	RIKEN cDNA 1700069L16 gene [Source:MGI Symbol;Acc:MGI:1920726]	5	1520	0.521711	0	0	0	0	0	0
ENSMUSG00000107637	1700069P05Rik	RIKEN cDNA 1700069P05 gene [Source:MGI Symbol;Acc:MGI:1920781]	6	785	0.50828	0	0	0	0	0	0
ENSMUSG00000086376	1700071G01Rik	RIKEN cDNA 1700071G01 gene [Source:MGI Symbol;Acc:MGI:1920735]	5	367	0.452316	0	0	0	0	0	0
ENSMUSG00000080980	1700071K01Rik	RIKEN cDNA 1700071K01 gene [Source:MGI Symbol;Acc:MGI:3588264]	11	819	0.545788	1	0	0	0	1	5
ENSMUSG00000090307	1700071M16Rik	RIKEN cDNA 1700071M16 gene [Source:MGI Symbol;Acc:MGI:1920754]	17	2883	0.42768	0	0	0	3	0	0
ENSMUSG00000100487	1700072B07Rik	RIKEN cDNA 1700072B07 gene [Source:MGI Symbol;Acc:MGI:1920779]	9	445	0.525843	0	0	2	0	0	0
ENSMUSG00000101702	1700072G22Rik	RIKEN cDNA 1700072G22 gene [Source:MGI Symbol;Acc:MGI:1920746]	1	548	0.432482	0	0	0	0	0	0
ENSMUSG00000107744	1700072O05Rik	RIKEN cDNA 1700072O05 gene [Source:MGI Symbol;Acc:MGI:1920755]	6	321	0.489097	0	0	0	0	0	0
ENSMUSG00000087204	1700073E17Rik	RIKEN cDNA 1700073E17 gene [Source:MGI Symbol;Acc:MGI:1920734]	6	1265	0.469565	0	0	0	0	0	0
ENSMUSG00000102231	1700074A21Rik	RIKEN cDNA 1700074A21 gene [Source:MGI Symbol;Acc:MGI:1920732]	1	346	0.393064	0	0	0	0	0	0
ENSMUSG00000099872	1700074H08Rik	RIKEN cDNA 1700074H08 gene [Source:MGI Symbol;Acc:MGI:1920730]	13	555	0.425225	0	0	0	0	0	0
ENSMUSG00000029883	1700074P13Rik	RIKEN cDNA 1700074P13 gene [Source:MGI Symbol;Acc:MGI:1920731]	6	1844	0.395336	0	0	0	0	0	0
ENSMUSG00000117741	1700080C20Rik	RIKEN cDNA 1700080C20 gene [Source:MGI Symbol;Acc:MGI:1925882]	17	186	0.462366	0	0	0	0	0	0
ENSMUSG00000084859	1700080N15Rik	RIKEN cDNA 1700080N15 gene [Source:MGI Symbol;Acc:MGI:1920739]	2	1465	0.430717	1	1	2	0	0	1
ENSMUSG00000105673	1700081B01Rik	RIKEN cDNA 1700081B01 gene [Source:MGI Symbol;Acc:MGI:1920750]	5	769	0.508453	0	0	0	0	0	0
ENSMUSG00000100573	1700081H04Rik	RIKEN cDNA 1700081H04 gene [Source:MGI Symbol;Acc:MGI:1920727]	5	1128	0.492021	0	0	0	0	0	0
ENSMUSG00000113209	1700081N11Rik	RIKEN cDNA 1700081N11 gene [Source:MGI Symbol;Acc:MGI:1920778]	12	688	0.545058	1	2	3	0	1	14
ENSMUSG00000023737	1700082M22Rik	RIKEN cDNA 1700082M22 gene [Source:MGI Symbol;Acc:MGI:1920784]	8	2210	0.403167	2	0	2	0	0	1
ENSMUSG00000100668	1700083H02Rik	RIKEN cDNA 1700083H02 gene [Source:MGI Symbol;Acc:MGI:1914598]	12	637	0.409733	0	0	0	0	0	0
ENSMUSG00000086016	1700084C06Rik	RIKEN cDNA 1700084C06 gene [Source:MGI Symbol;Acc:MGI:1923868]	9	750	0.537333	5	14	6	14	8	15
ENSMUSG00000114333	1700084D21Rik	RIKEN cDNA 1700084D21 gene [Source:MGI Symbol;Acc:MGI:1923970]	13	444	0.484234	0	0	0	0	0	0
ENSMUSG00000100747	1700084E18Rik	RIKEN cDNA 1700084E18 gene [Source:MGI Symbol;Acc:MGI:1914600]	2	1429	0.621414	9	2	5	7	4	0
ENSMUSG00000099639	1700084F23Rik	RIKEN cDNA 1700084F23 gene [Source:MGI Symbol;Acc:MGI:1921530]	13	2105	0.463183	0	0	0	0	0	0
ENSMUSG00000058101	1700084J12Rik	RIKEN cDNA 1700084J12 gene [Source:MGI Symbol;Acc:MGI:1920736]	15	1992	0.4749	0	0	0	0	1	0
ENSMUSG00000057805	1700084M14Rik	RIKEN cDNA 1700084M14 gene [Source:MGI Symbol;Acc:MGI:1920737]	X	559	0.429338	0	0	0	0	0	0
ENSMUSG00000100890	1700085C21Rik	RIKEN cDNA 1700085C21 gene [Source:MGI Symbol;Acc:MGI:1921533]	12	1082	0.48244	0	0	0	0	0	0
ENSMUSG00000115693	1700085D07Rik	RIKEN cDNA 1700085D07 gene [Source:MGI Symbol;Acc:MGI:1920741]	15	318	0.465409	0	0	0	0	0	0
ENSMUSG00000020548	1700086D15Rik	RIKEN cDNA 1700086D15 gene [Source:MGI Symbol;Acc:MGI:1921532]	11	1093	0.504117	16	15	5	11	18	3
ENSMUSG00000071265	1700086L19Rik	RIKEN cDNA 1700086L19 gene [Source:MGI Symbol;Acc:MGI:1921534]	12	1075	0.47814	5	1	0	0	0	0
ENSMUSG00000097080	1700086O06Rik	RIKEN cDNA 1700086O06 gene [Source:MGI Symbol;Acc:MGI:1920766]	18	2027	0.523434	11	12	16	4	28	18
ENSMUSG00000085085	1700086P04Rik	RIKEN cDNA 1700086P04 gene [Source:MGI Symbol;Acc:MGI:1914599]	4	1009	0.46779	1	0	0	0	12	3
ENSMUSG00000115099	1700087I21Rik	RIKEN cDNA 1700087I21 gene [Source:MGI Symbol;Acc:MGI:1923869]	14	4145	0.454282	62	29	32	115	72	50
ENSMUSG00000115723	1700087M22Rik	RIKEN cDNA 1700087M22 gene [Source:MGI Symbol;Acc:MGI:1925717]	14	208	0.418269	0	0	0	0	0	0
ENSMUSG00000033029	1700088E04Rik	RIKEN cDNA 1700088E04 gene [Source:MGI Symbol;Acc:MGI:1920774]	15	5292	0.550454	22	54	37	45	21	51
ENSMUSG00000090462	1700091H14Rik	RIKEN cDNA 1700091H14 gene [Source:MGI Symbol;Acc:MGI:1920803]	14	1391	0.435658	0	0	0	0	0	0
ENSMUSG00000086781	1700092C02Rik	RIKEN cDNA 1700092C02 gene [Source:MGI Symbol;Acc:MGI:1914607]	8	359	0.431755	0	0	0	0	0	0
ENSMUSG00000092499	1700092C10Rik	RIKEN cDNA 1700092C10 gene [Source:MGI Symbol;Acc:MGI:1920804]	14	585	0.505983	0	0	0	0	0	0
ENSMUSG00000085353	1700092C17Rik	RIKEN cDNA 1700092C17 gene [Source:MGI Symbol;Acc:MGI:1921545]	2	424	0.471698	0	0	0	0	0	0
ENSMUSG00000111487	1700092E16Rik	RIKEN cDNA 1700092E16 gene [Source:MGI Symbol;Acc:MGI:1921541]	10	753	0.480744	0	0	0	0	0	0
ENSMUSG00000084811	1700092E19Rik	RIKEN cDNA 1700092E19 gene [Source:MGI Symbol;Acc:MGI:1920826]	13	2006	0.454138	0	0	0	0	0	0
ENSMUSG00000078600	1700092K14Rik	RIKEN cDNA 1700092K14 gene [Source:MGI Symbol;Acc:MGI:1920786]	11	395	0.506329	0	0	0	0	5	0
[truncated: 53,417 more rows]

## Sheet: All Present Genes
gene_id	SYMBOL	DESCRIPTION	SEQNAME	Fold_Change	PValue	FDR	WT_0H_Avg_FPKM	FB_0H_Avg_FPKM
ENSMUSG00000068396	Rpl34-ps1	ribosomal protein L34, pseudogene 1 [Source:MGI Symbol;Acc:MGI:3704270]	6	180.132	4.67637e-121	6.80692e-117	1.15071	213.799
ENSMUSG00000101939	Gm28438	predicted gene 28438 [Source:MGI Symbol;Acc:MGI:5579144]	1	-104.085	1.87545e-51	1.36495e-47	80.9519	0.731696
ENSMUSG00000064360	mt-Nd3	mitochondrially encoded NADH dehydrogenase 3 [Source:MGI Symbol;Acc:MGI:102499]	MT	314.526	5.80162e-49	2.81495e-45	0.174654	67.4021
ENSMUSG00000059751	Rps3a3	ribosomal protein S3A3 [Source:MGI Symbol;Acc:MGI:3643406]	13	40.4132	9.69688e-49	3.52869e-45	1.17998	48.4137
ENSMUSG00000107092	Gm7993	predicted gene 7993 [Source:MGI Symbol;Acc:MGI:3647399]	5	368.725	1.78126e-44	5.18559e-41	0.0461669	19.926
ENSMUSG00000004668	Abca13	ATP-binding cassette, sub-family A (ABC1), member 13 [Source:MGI Symbol;Acc:MGI:2388707]	11	12.468	2.72423e-20	6.60899e-17	0.0974146	1.22013
ENSMUSG00000026480	Ncf2	neutrophil cytosolic factor 2 [Source:MGI Symbol;Acc:MGI:97284]	1	3.63404	1.76788e-17	3.67617e-14	1.90433	6.92066
ENSMUSG00000062006	Rpl34	ribosomal protein L34 [Source:MGI Symbol;Acc:MGI:1915686]	3	-2.30426	1.22063e-11	2.22094e-08	75.9417	32.9461
ENSMUSG00000085882	2610507I01Rik	RIKEN cDNA 2610507I01 gene [Source:MGI Symbol;Acc:MGI:1919453]	11	-231.597	1.01763e-09	1.64585e-06	2.01843	0
ENSMUSG00000000248	Clec2g	C-type lectin domain family 2, member g [Source:MGI Symbol;Acc:MGI:1918059]	6	184.907	2.81731e-09	4.10088e-06	0	0.769966
ENSMUSG00000062611	Rps3a2	ribosomal protein S3A2 [Source:MGI Symbol;Acc:MGI:3642853]	14	18.7233	4.65022e-09	6.15351e-06	0.42579	8.35077
ENSMUSG00000036466	Megf11	multiple EGF-like-domains 11 [Source:MGI Symbol;Acc:MGI:1920951]	9	-4.63046	5.56785e-09	6.7538e-06	1.70145	0.365404
ENSMUSG00000082100	Glns-ps1	glutamine synthetase pseudogene 1 [Source:MGI Symbol;Acc:MGI:95740]	11	75.983	6.74556e-09	7.55295e-06	0.0284963	2.93793
ENSMUSG00000028393	Alad	aminolevulinate, delta-, dehydratase [Source:MGI Symbol;Acc:MGI:96853]	4	2.00976	8.61336e-09	8.95544e-06	78.1233	157.032
ENSMUSG00000081519	Gm13331	predicted gene 13331 [Source:MGI Symbol;Acc:MGI:3649454]	2	145.069	1.09532e-07	0.00010629	0	3.82261
ENSMUSG00000066842	Hmcn1	hemicentin 1 [Source:MGI Symbol;Acc:MGI:2685047]	1	2.13489	2.22514e-07	0.000202432	1.3506	2.88198
ENSMUSG00000092624	Gm3654	predicted gene 3654 [Source:MGI Symbol;Acc:MGI:3781830]	7	-122.435	2.40696e-07	0.000206092	1.34128	0
ENSMUSG00000083240	Gm13453	predicted gene 13453 [Source:MGI Symbol;Acc:MGI:3651618]	2	18.4689	4.91655e-07	0.000397585	0.429742	8.64011
ENSMUSG00000020912	Krt12	keratin 12 [Source:MGI Symbol;Acc:MGI:96687]	11	-9.89093	7.5194e-07	0.000576065	3.76556	0.370484
ENSMUSG00000015222	Map2	microtubule-associated protein 2 [Source:MGI Symbol;Acc:MGI:97175]	1	-1.80294	2.28275e-06	0.00166138	14.3906	7.97937
ENSMUSG00000052632	Asap2	ArfGAP with SH3 domain, ankyrin repeat and PH domain 2 [Source:MGI Symbol;Acc:MGI:2685438]	12	-1.77059	3.4675e-06	0.00240347	22.6703	12.8066
ENSMUSG00000062209	Erbb4	erb-b2 receptor tyrosine kinase 4 [Source:MGI Symbol;Acc:MGI:104771]	1	2.09579	9.78674e-06	0.00647526	2.34331	4.9127
ENSMUSG00000066060	Gm12866	predicted gene 12866 [Source:MGI Symbol;Acc:MGI:3649462]	4	-15.9539	1.22154e-05	0.00773075	1.66684	0.100514
ENSMUSG00000091952	Gm17709	predicted gene, 17709 [Source:MGI Symbol;Acc:MGI:4937343]	8	19.6513	1.49945e-05	0.00887363	0.0582984	1.33558
ENSMUSG00000045679	Pqlc3	PQ loop repeat containing [Source:MGI Symbol;Acc:MGI:2444067]	12	3.23193	1.52405e-05	0.00887363	0.656669	2.12854
ENSMUSG00000051335	Gfod1	glucose-fructose oxidoreductase domain containing 1 [Source:MGI Symbol;Acc:MGI:2145304]	13	-2.30962	1.89619e-05	0.0102908	2.71644	1.17653
ENSMUSG00000005802	Slc30a4	solute carrier family 30 (zinc transporter), member 4 [Source:MGI Symbol;Acc:MGI:1345282]	2	-1.62675	1.93992e-05	0.0102908	13.5123	8.30938
ENSMUSG00000006395	Hyi	hydroxypyruvate isomerase (putative) [Source:MGI Symbol;Acc:MGI:1915430]	4	-2.29588	1.97955e-05	0.0102908	11.2283	4.88413
ENSMUSG00000005148	Klf5	Kruppel-like factor 5 [Source:MGI Symbol;Acc:MGI:1338056]	14	-3.57259	2.54276e-05	0.0127629	1.80576	0.505082
ENSMUSG00000085787	Gm13092	predicted gene 13092 [Source:MGI Symbol;Acc:MGI:3649661]	4	4.51947	3.1304e-05	0.0147536	9.99704	45.2265
ENSMUSG00000093846	Gm4425	predicted gene 4425 [Source:MGI Symbol;Acc:MGI:3809660]	12	14.5193	3.14208e-05	0.0147536	0.0324251	0.531909
ENSMUSG00000100789	Gm29508	predicted gene 29508 [Source:MGI Symbol;Acc:MGI:5580214]	12	8.19595	3.85446e-05	0.017533	0.353054	3.00863
ENSMUSG00000003411	Rab3b	RAB3B, member RAS oncogene family [Source:MGI Symbol;Acc:MGI:1917158]	4	-1.86337	4.1119e-05	0.0181372	12.5825	6.75714
ENSMUSG00000027335	Adra1d	adrenergic receptor, alpha 1d [Source:MGI Symbol;Acc:MGI:106673]	2	-4.54229	4.43294e-05	0.0189782	2.55901	0.558681
ENSMUSG00000041696	Rasl12	RAS-like, family 12 [Source:MGI Symbol;Acc:MGI:1918034]	9	-2.28251	5.05334e-05	0.0210161	6.53489	2.86279
ENSMUSG00000020400	Tnip1	TNFAIP3 interacting protein 1 [Source:MGI Symbol;Acc:MGI:1926194]	11	-1.59488	5.45067e-05	0.0214152	16.9622	10.6372
ENSMUSG00000051262	Nat8f3	N-acetyltransferase 8 (GCN5-related) family member 3 [Source:MGI Symbol;Acc:MGI:2136449]	6	14.0428	5.50539e-05	0.0214152	0.0305532	0.471444
ENSMUSG00000035673	Sbno2	strawberry notch 2 [Source:MGI Symbol;Acc:MGI:2448490]	10	-2.11122	5.59066e-05	0.0214152	7.97615	3.77964
ENSMUSG00000033705	Stard9	START domain containing 9 [Source:MGI Symbol;Acc:MGI:3045258]	2	3.36234	6.08209e-05	0.0227002	0.186351	0.62815
ENSMUSG00000022799	Arhgap31	Rho GTPase activating protein 31 [Source:MGI Symbol;Acc:MGI:1333857]	16	-1.60315	7.36734e-05	0.0268098	15.3504	9.57732
ENSMUSG00000026305	Lrrfip1	leucine rich repeat (in FLII) interacting protein 1 [Source:MGI Symbol;Acc:MGI:1342770]	1	-1.56843	7.9434e-05	0.0279638	13.506	8.61528
ENSMUSG00000030170	Wnt5b	wingless-type MMTV integration site family, member 5B [Source:MGI Symbol;Acc:MGI:98959]	6	1.61435	8.0687e-05	0.0279638	19.3616	31.2609
ENSMUSG00000043424	Eif3j2	eukaryotic translation initiation factor 3, subunit J2 [Source:MGI Symbol;Acc:MGI:3704486]	18	5.41465	8.4654e-05	0.0286564	0.365929	2.01289
ENSMUSG00000004655	Aqp1	aquaporin 1 [Source:MGI Symbol;Acc:MGI:103201]	6	1.77687	8.87461e-05	0.0293588	62.1426	110.427
ENSMUSG00000006386	Tek	TEK receptor tyrosine kinase [Source:MGI Symbol;Acc:MGI:98664]	4	10.3526	9.64079e-05	0.0307693	0.0268084	0.30004
ENSMUSG00000028172	Tacr3	tachykinin receptor 3 [Source:MGI Symbol;Acc:MGI:892968]	3	6.18209	9.72373e-05	0.0307693	0.193451	1.21119
ENSMUSG00000035873	Pawr	PRKC, apoptosis, WT1, regulator [Source:MGI Symbol;Acc:MGI:2149961]	10	-1.92152	9.94941e-05	0.0308135	16.5177	8.58797
ENSMUSG00000078651	Aoc2	amine oxidase, copper containing 2 (retina-specific) [Source:MGI Symbol;Acc:MGI:2668431]	11	-6.00501	0.000112948	0.0335667	2.00805	0.331281
ENSMUSG00000032357	Tinag	tubulointerstitial nephritis antigen [Source:MGI Symbol;Acc:MGI:1349477]	9	-3.39211	0.000112996	0.0335667	4.58039	1.33704
ENSMUSG00000090877	Hspa1b	heat shock protein 1B [Source:MGI Symbol;Acc:MGI:99517]	17	-1.80803	0.000115643	0.0335819	11.7547	6.49991
ENSMUSG00000030287	Itpr2	inositol 1,4,5-triphosphate receptor 2 [Source:MGI Symbol;Acc:MGI:99418]	6	1.67479	0.000117661	0.0335819	1.70329	2.85308
ENSMUSG00000097891	Gm3650	predicted gene 3650 [Source:MGI Symbol;Acc:MGI:3781826]	18	11.9342	0.000120708	0.0337891	0.124014	1.67343
ENSMUSG00000017639	Rab11fip4	RAB11 family interacting protein 4 (class II) [Source:MGI Symbol;Acc:MGI:2442920]	11	1.59083	0.000124279	0.0341321	5.65511	8.99417
ENSMUSG00000019478	Rab4a	RAB4A, member RAS oncogene family [Source:MGI Symbol;Acc:MGI:105069]	8	-3.00965	0.000129039	0.0345169	5.97383	1.97679
ENSMUSG00000043496	Tril	TLR4 interactor with leucine-rich repeats [Source:MGI Symbol;Acc:MGI:1914123]	6	2.23689	0.000130423	0.0345169	4.79129	10.7227
ENSMUSG00000096010	H4f16	H4 histone 16 [Source:MGI Symbol;Acc:MGI:2448443]	6	2.54842	0.000157456	0.0409272	1.66441	4.25155
ENSMUSG00000068874	Selenbp1	selenium binding protein 1 [Source:MGI Symbol;Acc:MGI:96825]	3	1.74933	0.000185123	0.0472745	7.63719	13.3626
ENSMUSG00000097715	Gpr137b-ps	G protein-coupled receptor 137B, pseudogene [Source:MGI Symbol;Acc:MGI:3710533]	13	-1.81331	0.000221079	0.0554832	8.23457	4.5466
ENSMUSG00000019947	Arid5b	AT rich interactive domain 5B (MRF1-like) [Source:MGI Symbol;Acc:MGI:2175912]	10	-1.59677	0.000243269	0.0600172	19.6314	12.2936
ENSMUSG00000109784	Gm45493	predicted gene 45493 [Source:MGI Symbol;Acc:MGI:5791329]	8	-8.60883	0.000249499	0.0605283	0.665095	0.0757176
ENSMUSG00000032334	Loxl1	lysyl oxidase-like 1 [Source:MGI Symbol;Acc:MGI:106096]	9	1.54305	0.000266286	0.0635421	35.723	55.1172
ENSMUSG00000056999	Ide	insulin degrading enzyme [Source:MGI Symbol;Acc:MGI:96412]	19	1.56055	0.000276004	0.0647987	10.6609	16.6426
ENSMUSG00000024660	Incenp	inner centromere protein [Source:MGI Symbol;Acc:MGI:1313288]	19	1.92754	0.000349403	0.0807287	2.29106	4.41756
ENSMUSG00000023905	Tnfrsf12a	tumor necrosis factor receptor superfamily, member 12a [Source:MGI Symbol;Acc:MGI:1351484]	17	-2.03041	0.000402392	0.091519	17.7074	8.72272
ENSMUSG00000028793	Rnf19b	ring finger protein 19B [Source:MGI Symbol;Acc:MGI:1922484]	4	-1.59776	0.000410665	0.0919637	22.9495	14.3729
ENSMUSG00000039384	Dusp10	dual specificity phosphatase 10 [Source:MGI Symbol;Acc:MGI:1927070]	1	-2.94881	0.000420384	0.0927139	4.49876	1.52669
ENSMUSG00000052957	Gas1	growth arrest specific 1 [Source:MGI Symbol;Acc:MGI:95655]	13	1.66759	0.000436185	0.0947628	9.74875	16.2554
ENSMUSG00000063430	Wscd2	WSC domain containing 2 [Source:MGI Symbol;Acc:MGI:2445030]	5	2.55594	0.000452977	0.0963171	0.206995	0.53021
ENSMUSG00000025582	Nptx1	neuronal pentraxin 1 [Source:MGI Symbol;Acc:MGI:107811]	11	-3.95081	0.000456573	0.0963171	1.05451	0.262993
ENSMUSG00000021215	Net1	neuroepithelial cell transforming gene 1 [Source:MGI Symbol;Acc:MGI:1927138]	13	-1.72451	0.000484168	0.100679	10.0447	5.82201
ENSMUSG00000032035	Ets1	E26 avian leukemia oncogene 1, 5' domain [Source:MGI Symbol;Acc:MGI:95455]	9	-2.78334	0.000568103	0.116469	1.70003	0.611022
ENSMUSG00000106057	Gm43560	predicted gene 43560 [Source:MGI Symbol;Acc:MGI:5663697]	3	-7.17434	0.000579586	0.117173	1.91674	0.261198
ENSMUSG00000042254	Cilp	cartilage intermediate layer protein, nucleotide pyrophosphohydrolase [Source:MGI Symbol;Acc:MGI:2444507]	9	-1.61985	0.000636094	0.126708	20.7534	12.8142
ENSMUSG00000023034	Nr4a1	nuclear receptor subfamily 4, group A, member 1 [Source:MGI Symbol;Acc:MGI:1352454]	15	2.35288	0.000646078	0.126708	9.2531	21.7798
ENSMUSG00000020183	Cpm	carboxypeptidase M [Source:MGI Symbol;Acc:MGI:1917824]	10	-2.81694	0.000652863	0.126708	2.09296	0.740875
ENSMUSG00000034278	Dnajc17	DnaJ heat shock protein family (Hsp40) member C17 [Source:MGI Symbol;Acc:MGI:1916658]	2	-2.12673	0.000684094	0.131022	10.7373	5.04536
ENSMUSG00000061039	Olfr920	olfactory receptor 920 [Source:MGI Symbol;Acc:MGI:3030754]	9	-3.62917	0.000700798	0.131364	0.914191	0.249229
ENSMUSG00000024663	Rab3il1	RAB3A interacting protein (rabin3)-like 1 [Source:MGI Symbol;Acc:MGI:1922010]	19	1.77761	0.00070393	0.131364	3.55954	6.33236
ENSMUSG00000022793	B4galt4	UDP-Gal:betaGlcNAc beta 1,4-galactosyltransferase, polypeptide 4 [Source:MGI Symbol;Acc:MGI:1928387]	16	2.11985	0.000716125	0.131948	1.80212	3.8244
ENSMUSG00000032359	Ctsh	cathepsin H [Source:MGI Symbol;Acc:MGI:107285]	9	2.19811	0.000755637	0.137488	2.15761	4.74087
ENSMUSG00000041669	Prima1	proline rich membrane anchor 1 [Source:MGI Symbol;Acc:MGI:1926097]	12	2.00698	0.000784768	0.138697	6.06946	12.1979
ENSMUSG00000019689	Fmc1	formation of mitochondrial complex V assembly factor 1 [Source:MGI Symbol;Acc:MGI:1913367]	6	3.82632	0.000800881	0.138697	1.54648	5.97656
ENSMUSG00000107707	Gm44286	predicted gene, 44286 [Source:MGI Symbol;Acc:MGI:5690678]	6	-8.19944	0.000803772	0.138697	2.22124	0.26636
ENSMUSG00000025969	Nrp2	neuropilin 2 [Source:MGI Symbol;Acc:MGI:1100492]	1	2.01233	0.000808732	0.138697	0.971033	1.95268
ENSMUSG00000031762	Mt2	metallothionein 2 [Source:MGI Symbol;Acc:MGI:97172]	8	-1.86024	0.000809924	0.138697	52.2726	28.1339
ENSMUSG00000022895	Ets2	E26 avian leukemia oncogene 2, 3' domain [Source:MGI Symbol;Acc:MGI:95456]	16	-1.59132	0.000823373	0.139361	6.57348	4.1295
ENSMUSG00000020023	Tmcc3	transmembrane and coiled coil domains 3 [Source:MGI Symbol;Acc:MGI:2442900]	10	-1.57914	0.000844028	0.141215	14.067	8.91082
ENSMUSG00000047446	Arl4a	ADP-ribosylation factor-like 4A [Source:MGI Symbol;Acc:MGI:99437]	12	-1.43536	0.000866078	0.143257	10.2525	7.14485
ENSMUSG00000049313	Sorl1	sortilin-related receptor, LDLR class A repeats-containing [Source:MGI Symbol;Acc:MGI:1202296]	9	1.62499	0.000880492	0.144005	7.82848	12.7219
ENSMUSG00000038319	Kcnh2	potassium voltage-gated channel, subfamily H (eag-related), member 2 [Source:MGI Symbol;Acc:MGI:1341722]	5	1.52507	0.000898502	0.144198	10.9054	16.6336
ENSMUSG00000046618	Olfml2a	olfactomedin-like 2A [Source:MGI Symbol;Acc:MGI:2444741]	2	1.52199	0.000912163	0.144198	45.7313	69.5981
ENSMUSG00000048355	Arxes1	adipocyte-related X-chromosome expressed sequence 1 [Source:MGI Symbol;Acc:MGI:1923469]	X	7.42607	0.000919575	0.144198	0.160124	1.2352
ENSMUSG00000048612	Myof	myoferlin [Source:MGI Symbol;Acc:MGI:1919192]	19	-1.50974	0.000921297	0.144198	7.21861	4.78259
ENSMUSG00000048280	Zfp738	zinc finger protein 738 [Source:MGI Symbol;Acc:MGI:3040706]	13	-1.83873	0.000964661	0.149379	1.19403	0.648782
ENSMUSG00000069206	Zfp874a	zinc finger protein 874a [Source:MGI Symbol;Acc:MGI:3040703]	13	-3.29329	0.00102845	0.156823	0.750458	0.225669
ENSMUSG00000000305	Cdh4	cadherin 4 [Source:MGI Symbol;Acc:MGI:99218]	2	1.55414	0.00103428	0.156823	9.71498	15.0986
ENSMUSG00000053414	Hunk	hormonally upregulated Neu-associated kinase [Source:MGI Symbol;Acc:MGI:1347352]	16	1.50886	0.00107215	0.160889	8.38802	12.6533
ENSMUSG00000060733	Ipmk	inositol polyphosphate multikinase [Source:MGI Symbol;Acc:MGI:1916968]	10	-1.63023	0.0010998	0.163354	5.93993	3.64626
ENSMUSG00000034471	Caskin2	CASK-interacting protein 2 [Source:MGI Symbol;Acc:MGI:2157062]	11	1.67738	0.00111733	0.164282	6.71181	11.2538
ENSMUSG00000027227	Sord	sorbitol dehydrogenase [Source:MGI Symbol;Acc:MGI:98266]	2	1.59101	0.00114533	0.166714	16.0269	25.5011
ENSMUSG00000029484	Anxa3	annexin A3 [Source:MGI Symbol;Acc:MGI:1201378]	5	-1.61776	0.00118548	0.169472	9.79414	6.0592
ENSMUSG00000025189	Cnnm1	cyclin M1 [Source:MGI Symbol;Acc:MGI:1891366]	19	-2.2163	0.00119749	0.169472	2.08803	0.941762
ENSMUSG00000009394	Syn2	synapsin II [Source:MGI Symbol;Acc:MGI:103020]	6	-2.63007	0.00119921	0.169472	0.918084	0.348397
ENSMUSG00000063382	Bcl9l	B cell CLL/lymphoma 9-like [Source:MGI Symbol;Acc:MGI:1933114]	9	1.55425	0.00124058	0.173217	9.10586	14.1519
ENSMUSG00000033722	BC034090	cDNA sequence BC034090 [Source:MGI Symbol;Acc:MGI:2672904]	1	1.48105	0.00124951	0.173217	6.83113	10.1149
ENSMUSG00000056069	Otulinl	OTU deubiquitinase with linear linkage specificity like [Source:MGI Symbol;Acc:MGI:2687281]	15	1.83488	0.00132854	0.182436	4.93995	9.07616
ENSMUSG00000027999	Pla2g12a	phospholipase A2, group XIIA [Source:MGI Symbol;Acc:MGI:1913600]	3	1.51205	0.00138872	0.188918	7.86973	11.9021
ENSMUSG00000108689	Gm45354	predicted gene 45354 [Source:MGI Symbol;Acc:MGI:5791190]	3	-5.91956	0.00142752	0.190937	0.61388	0.0988622
ENSMUSG00000036040	Adamtsl2	ADAMTS-like 2 [Source:MGI Symbol;Acc:MGI:1925044]	2	4.13016	0.0014298	0.190937	0.250928	1.03946
ENSMUSG00000036585	Fgf1	fibroblast growth factor 1 [Source:MGI Symbol;Acc:MGI:95515]	18	1.45472	0.00145023	0.191102	9.99529	14.537
ENSMUSG00000045636	Mtus1	mitochondrial tumor suppressor 1 [Source:MGI Symbol;Acc:MGI:2142572]	8	1.77863	0.00145729	0.191102	5.87004	10.4391
ENSMUSG00000052833	Sae1	SUMO1 activating enzyme subunit 1 [Source:MGI Symbol;Acc:MGI:1929264]	7	1.44233	0.00150313	0.195353	19.9489	28.7812
ENSMUSG00000008999	Bmp7	bone morphogenetic protein 7 [Source:MGI Symbol;Acc:MGI:103302]	2	1.42817	0.00154015	0.198394	26.8291	38.3115
ENSMUSG00000051678	Pcdhb6	protocadherin beta 6 [Source:MGI Symbol;Acc:MGI:2136740]	18	3.98853	0.00155507	0.198557	0.209899	0.844039
ENSMUSG00000054196	Cthrc1	collagen triple helix repeat containing 1 [Source:MGI Symbol;Acc:MGI:1915838]	15	1.82059	0.00157772	0.199698	6.33289	11.5475
ENSMUSG00000044518	Foxe3	forkhead box E3 [Source:MGI Symbol;Acc:MGI:1353569]	4	1.43765	0.00161153	0.202219	204.912	294.611
ENSMUSG00000063887	Nlgn1	neuroligin 1 [Source:MGI Symbol;Acc:MGI:2179435]	3	1.88443	0.00167002	0.207767	0.919631	1.73317
ENSMUSG00000007812	Zfp655	zinc finger protein 655 [Source:MGI Symbol;Acc:MGI:1919861]	5	-1.4855	0.0016893	0.208385	12.3703	8.33113
ENSMUSG00000032332	Col12a1	collagen, type XII, alpha 1 [Source:MGI Symbol;Acc:MGI:88448]	9	-2.15809	0.00178581	0.21844	1.67634	0.775962
ENSMUSG00000027015	Cybrd1	cytochrome b reductase 1 [Source:MGI Symbol;Acc:MGI:2654575]	2	1.45028	0.00180605	0.219074	20.9819	30.4305
ENSMUSG00000033114	Slc35d2	solute carrier family 35, member D2 [Source:MGI Symbol;Acc:MGI:1917734]	13	-6.10789	0.00186422	0.224007	0.370652	0.0561709
ENSMUSG00000059326	Csf2ra	colony stimulating factor 2 receptor, alpha, low-affinity (granulocyte-macrophage) [Source:MGI Symbol;Acc:MGI:1339754]	19	-1.58676	0.0018775	0.224007	11.0603	6.96952
ENSMUSG00000039208	Metrnl	meteorin, glial cell differentiation regulator-like [Source:MGI Symbol;Acc:MGI:2384806]	11	1.71112	0.00194026	0.229613	12.1818	20.8615
ENSMUSG00000074171	Gm6658	predicted gene 6658 [Source:MGI Symbol;Acc:MGI:3645470]	8	6.22456	0.00195989	0.230066	0.199698	1.27462
ENSMUSG00000020658	Efr3b	EFR3 homolog B [Source:MGI Symbol;Acc:MGI:2444851]	12	1.39822	0.00210265	0.244436	5.61046	7.84391
ENSMUSG00000107994	D830050J10Rik	RIKEN cDNA D830050J10 gene [Source:MGI Symbol;Acc:MGI:2444203]	6	4.42037	0.00211589	0.244436	0.590632	2.63732
ENSMUSG00000040857	Erf	Ets2 repressor factor [Source:MGI Symbol;Acc:MGI:109637]	7	-1.46485	0.00231219	0.26343	12.2705	8.37428
ENSMUSG00000029135	Fosl2	fos-like antigen 2 [Source:MGI Symbol;Acc:MGI:102858]	5	-1.51863	0.00231651	0.26343	22.5763	14.87
ENSMUSG00000031530	Dusp4	dual specificity phosphatase 4 [Source:MGI Symbol;Acc:MGI:2442191]	8	-2.11356	0.0023428	0.264355	6.012	2.84527
ENSMUSG00000024803	Ankrd1	ankyrin repeat domain 1 (cardiac muscle) [Source:MGI Symbol;Acc:MGI:1097717]	19	-3.16899	0.00245674	0.275079	1.58242	0.498864
ENSMUSG00000038422	Hdhd3	haloacid dehalogenase-like hydrolase domain containing 3 [Source:MGI Symbol;Acc:MGI:1919998]	4	2.13219	0.00261452	0.290512	3.17474	6.78173
ENSMUSG00000062300	Nectin2	nectin cell adhesion molecule 2 [Source:MGI Symbol;Acc:MGI:97822]	7	1.49885	0.00264912	0.291009	9.13846	13.6984
ENSMUSG00000009378	Slc16a12	solute carrier family 16 (monocarboxylic acid transporters), member 12 [Source:MGI Symbol;Acc:MGI:2147716]	19	1.46173	0.0026876	0.291009	10.3581	15.1408
ENSMUSG00000027408	Cpxm1	carboxypeptidase X 1 (M14 family) [Source:MGI Symbol;Acc:MGI:1934569]	2	1.53795	0.00272035	0.291009	14.2548	21.9216
ENSMUSG00000020018	Snrpf	small nuclear ribonucleoprotein polypeptide F [Source:MGI Symbol;Acc:MGI:1917128]	10	-1.50022	0.00274307	0.291009	43.8578	29.2462
ENSMUSG00000027800	Tm4sf1	transmembrane 4 superfamily member 1 [Source:MGI Symbol;Acc:MGI:104678]	3	-1.50997	0.00275096	0.291009	8.29575	5.49018
ENSMUSG00000045287	Rtn4rl1	reticulon 4 receptor-like 1 [Source:MGI Symbol;Acc:MGI:2661375]	11	1.55743	0.00276257	0.291009	8.97762	13.9731
ENSMUSG00000074283	Zfp109	zinc finger protein 109 [Source:MGI Symbol;Acc:MGI:1929099]	7	-3.35381	0.00277636	0.291009	1.21016	0.356167
ENSMUSG00000083657	Gm12245	predicted gene 12245 [Source:MGI Symbol;Acc:MGI:3649494]	11	6.63499	0.00277894	0.291009	0.97902	6.62777
ENSMUSG00000030203	Dusp16	dual specificity phosphatase 16 [Source:MGI Symbol;Acc:MGI:1917936]	6	-1.56828	0.00293891	0.303462	9.61272	6.12655
ENSMUSG00000029838	Ptn	pleiotrophin [Source:MGI Symbol;Acc:MGI:97804]	6	1.5212	0.00296437	0.303462	35.7805	54.421
ENSMUSG00000037447	Arid5a	AT rich interactive domain 5A (MRF1-like) [Source:MGI Symbol;Acc:MGI:2443039]	1	-1.78403	0.00298104	0.303462	1.85817	1.0409
ENSMUSG00000037211	Spry1	sprouty RTK signaling antagonist 1 [Source:MGI Symbol;Acc:MGI:1345139]	3	-1.58898	0.00298125	0.303462	11.0285	6.93395
ENSMUSG00000021536	Adcy2	adenylate cyclase 2 [Source:MGI Symbol;Acc:MGI:99676]	13	-2.1577	0.00300654	0.303911	1.86385	0.862328
ENSMUSG00000025504	Eps8l2	EPS8-like 2 [Source:MGI Symbol;Acc:MGI:2138828]	7	-1.41326	0.00309856	0.311053	11.172	7.90532
ENSMUSG00000038170	Pde4dip	phosphodiesterase 4D interacting protein (myomegalin) [Source:MGI Symbol;Acc:MGI:1891434]	3	1.40281	0.00312705	0.311763	4.2395	5.94668
ENSMUSG00000028567	Txndc12	thioredoxin domain containing 12 (endoplasmic reticulum) [Source:MGI Symbol;Acc:MGI:1913323]	4	1.38522	0.00316378	0.313279	24.8419	34.4191
ENSMUSG00000006651	Aplp1	amyloid beta (A4) precursor-like protein 1 [Source:MGI Symbol;Acc:MGI:88046]	7	-1.51828	0.00321743	0.315235	21.9174	14.4287
ENSMUSG00000118667	Ahnak2	AHNAK nucleoprotein 2 [Source:NCBI gene (formerly Entrezgene);Acc:100041194]	12	-3.58032	0.00323864	0.315235	1.21644	0.339121
ENSMUSG00000072774	Zfp951	zinc finger protein 951 [Source:MGI Symbol;Acc:MGI:2441896]	5	-2.38213	0.0032485	0.315235	2	0.840604
ENSMUSG00000022146	Osmr	oncostatin M receptor [Source:MGI Symbol;Acc:MGI:1330819]	15	-1.64963	0.00329352	0.316005	2.45771	1.49048
ENSMUSG00000019194	Scn1b	sodium channel, voltage-gated, type I, beta [Source:MGI Symbol;Acc:MGI:98247]	7	-4.21593	0.00329986	0.316005	1.23987	0.285363
ENSMUSG00000099759	1700030C10Rik	RIKEN cDNA 1700030C10 gene [Source:MGI Symbol;Acc:MGI:1916763]	12	-3.55891	0.00335344	0.318338	2.98272	0.834158
ENSMUSG00000028633	Ctps	cytidine 5'-triphosphate synthase [Source:MGI Symbol;Acc:MGI:1858304]	4	-1.50815	0.00336796	0.318338	14.2848	9.47325
ENSMUSG00000031584	Gsr	glutathione reductase [Source:MGI Symbol;Acc:MGI:95804]	8	-1.54502	0.00359556	0.335603	10.1339	6.5599
ENSMUSG00000020542	Myocd	myocardin [Source:MGI Symbol;Acc:MGI:2137495]	11	-4.61208	0.00359673	0.335603	0.214509	0.0451821
ENSMUSG00000022894	Adamts5	a disintegrin-like and metallopeptidase (reprolysin type) with thrombospondin type 1 motif, 5 (aggrecanase-2) [Source:MGI Symbol;Acc:MGI:1346321]	16	1.41421	0.00363485	0.337	5.48628	7.75716
ENSMUSG00000117525	Gm50034	predicted gene, 50034 [Source:MGI Symbol;Acc:MGI:6275338]	17	4.90637	0.00369412	0.33874	0.484533	2.4311
ENSMUSG00000040280	Ndufa4l2	Ndufa4, mitochondrial complex associated like 2 [Source:MGI Symbol;Acc:MGI:3039567]	10	1.74343	0.00370375	0.33874	11.9654	20.8779
ENSMUSG00000006345	Ggt1	gamma-glutamyltransferase 1 [Source:MGI Symbol;Acc:MGI:95706]	10	1.67157	0.00373318	0.33874	3.98116	6.65779
ENSMUSG00000089371	Mir1938	microRNA 1938 [Source:MGI Symbol;Acc:MGI:3836976]	12	5.16047	0.00374672	0.33874	2.78093	15.0221
ENSMUSG00000021366	Hivep1	human immunodeficiency virus type I enhancer binding protein 1 [Source:MGI Symbol;Acc:MGI:96100]	13	-1.35915	0.00385734	0.346589	19.1718	14.1054
ENSMUSG00000089762	Ier5l	immediate early response 5-like [Source:MGI Symbol;Acc:MGI:1919750]	2	3.557	0.0039141	0.349531	0.24483	0.883238
ENSMUSG00000070802	Pnmal2	PNMA-like 2 [Source:MGI Symbol;Acc:MGI:3645856]	7	1.46511	0.00394895	0.350493	25.9693	38.0478
ENSMUSG00000035783	Acta2	actin, alpha 2, smooth muscle, aorta [Source:MGI Symbol;Acc:MGI:87909]	19	-1.44601	0.00405996	0.358162	121.085	83.737
ENSMUSG00000068699	Flnc	filamin C, gamma [Source:MGI Symbol;Acc:MGI:95557]	6	-2.86829	0.00414003	0.363026	16.7789	5.84976
ENSMUSG00000049892	Rasd1	RAS, dexamethasone-induced 1 [Source:MGI Symbol;Acc:MGI:1270848]	11	3.15443	0.00417456	0.363416	0.922326	2.92147
ENSMUSG00000006344	Ggt5	gamma-glutamyltransferase 5 [Source:MGI Symbol;Acc:MGI:1346063]	10	3.44779	0.00419441	0.363416	0.14193	0.496134
ENSMUSG00000028068	Iqgap3	IQ motif containing GTPase activating protein 3 [Source:MGI Symbol;Acc:MGI:3028642]	3	2.05159	0.0042483	0.36426	0.396792	0.816055
ENSMUSG00000036061	Smug1	single-strand selective monofunctional uracil DNA glycosylase [Source:MGI Symbol;Acc:MGI:1918976]	15	-2.28988	0.00425421	0.36426	1.34851	0.585461
ENSMUSG00000047844	Bex4	brain expressed X-linked 4 [Source:MGI Symbol;Acc:MGI:3606746]	X	-1.62721	0.00430852	0.366753	25.6214	15.7288
ENSMUSG00000029641	Rasl11a	RAS-like, family 11, member A [Source:MGI Symbol;Acc:MGI:1916145]	5	4.61575	0.00436423	0.369336	0.260524	1.24357
ENSMUSG00000055003	Lrtm2	leucine-rich repeats and transmembrane domains 2 [Source:MGI Symbol;Acc:MGI:2141485]	6	1.38818	0.00444828	0.374273	14.9038	20.688
ENSMUSG00000022523	Fgf12	fibroblast growth factor 12 [Source:MGI Symbol;Acc:MGI:109183]	16	-3.21318	0.0045671	0.382061	5.76761	1.79341
ENSMUSG00000062822	4833420G17Rik	RIKEN cDNA 4833420G17 gene [Source:MGI Symbol;Acc:MGI:1914642]	13	-1.82982	0.0046455	0.386399	4.41488	2.41359
ENSMUSG00000081476	Itpa-ps1	inosine triphosphatase (nucleoside triphosphate pyrophosphatase) pseudogene 1 [Source:MGI Symbol;Acc:MGI:3613363]	2	-5.68329	0.00472513	0.387345	2.58115	0.444656
ENSMUSG00000108365	Gm44951	predicted gene 44951 [Source:MGI Symbol;Acc:MGI:5753527]	7	-3.97728	0.00473096	0.387345	0.777078	0.191342
ENSMUSG00000026235	Epha4	Eph receptor A4 [Source:MGI Symbol;Acc:MGI:98277]	1	1.98775	0.0047367	0.387345	0.581037	1.15579
ENSMUSG00000032802	Srxn1	sulfiredoxin 1 homolog (S. cerevisiae) [Source:MGI Symbol;Acc:MGI:104971]	2	-1.85688	0.00478057	0.387383	15.6944	8.45633
ENSMUSG00000032773	Chrm1	cholinergic receptor, muscarinic 1, CNS [Source:MGI Symbol;Acc:MGI:88396]	19	1.49309	0.00482095	0.387383	4.1435	6.18478
ENSMUSG00000022235	Cmbl	carboxymethylenebutenolidase-like (Pseudomonas) [Source:MGI Symbol;Acc:MGI:1916824]	15	2.10671	0.00483716	0.387383	3.27345	6.90155
ENSMUSG00000028967	Errfi1	ERBB receptor feedback inhibitor 1 [Source:MGI Symbol;Acc:MGI:1921405]	4	-1.45408	0.00486017	0.387383	16.8882	11.6165
ENSMUSG00000006542	Prkag3	protein kinase, AMP-activated, gamma 3 non-catalytic subunit [Source:MGI Symbol;Acc:MGI:1891343]	1	-4.72026	0.00487023	0.387383	0.585926	0.121295
ENSMUSG00000015568	Lpl	lipoprotein lipase [Source:MGI Symbol;Acc:MGI:96820]	8	1.38785	0.00496133	0.390335	3.73244	5.17902
ENSMUSG00000042828	Trim72	tripartite motif-containing 72 [Source:MGI Symbol;Acc:MGI:3612190]	7	-4.51537	0.00501794	0.390335	1.04835	0.22636
ENSMUSG00000107082	Gm36378	predicted gene, 36378 [Source:MGI Symbol;Acc:MGI:5595537]	5	-8.90534	0.00502128	0.390335	7.86928	0.868823
ENSMUSG00000087598	Zfp111	zinc finger protein 111 [Source:MGI Symbol;Acc:MGI:1929114]	7	-1.8666	0.00502601	0.390335	1.74783	0.936932
ENSMUSG00000023953	Polh	polymerase (DNA directed), eta (RAD 30 related) [Source:MGI Symbol;Acc:MGI:1891457]	17	2.12166	0.00504142	0.390335	0.775969	1.64873
ENSMUSG00000028063	Lmna	lamin A [Source:MGI Symbol;Acc:MGI:96794]	3	-1.35153	0.00512903	0.395017	26.8177	19.8462
ENSMUSG00000038473	Nos1ap	nitric oxide synthase 1 (neuronal) adaptor protein [Source:MGI Symbol;Acc:MGI:1917979]	1	1.43315	0.00524843	0.402085	5.23808	7.50529
ENSMUSG00000053007	Creb5	cAMP responsive element binding protein 5 [Source:MGI Symbol;Acc:MGI:2443973]	6	-2.49682	0.00528372	0.402669	1.60235	0.64185
ENSMUSG00000009207	Lnpk	lunapark, ER junction formation factor [Source:MGI Symbol;Acc:MGI:1918115]	2	-1.4794	0.00538633	0.405283	10.6683	7.21287
ENSMUSG00000010064	Slc38a3	solute carrier family 38, member 3 [Source:MGI Symbol;Acc:MGI:1923507]	9	1.38263	0.00541263	0.405283	12.2363	16.9116
ENSMUSG00000102349	Gm37376	predicted gene, 37376 [Source:MGI Symbol;Acc:MGI:5610604]	19	-2.22577	0.00541486	0.405283	32.4004	14.5709
ENSMUSG00000090290	Tarbp1	TAR RNA binding protein 1 [Source:MGI Symbol;Acc:MGI:4936930]	8	1.74259	0.00542938	0.405283	1.54608	2.69497
ENSMUSG00000067430	Zfp763	zinc finger protein 763 [Source:MGI Symbol;Acc:MGI:1920701]	17	-1.62688	0.0054911	0.40739	6.13406	3.76434
ENSMUSG00000043639	Rbm20	RNA binding motif protein 20 [Source:MGI Symbol;Acc:MGI:1920963]	19	1.37155	0.00551358	0.40739	7.19387	9.86977
ENSMUSG00000070327	Rnf213	ring finger protein 213 [Source:MGI Symbol;Acc:MGI:1289196]	11	1.62701	0.00564077	0.413874	4.35665	7.08925
ENSMUSG00000000794	Kcnn3	potassium intermediate/small conductance calcium-activated channel, subfamily N, member 3 [Source:MGI Symbol;Acc:MGI:2153183]	3	2.5734	0.00566433	0.413874	0.187491	0.483177
ENSMUSG00000066838	Zfp772	zinc finger protein 772 [Source:MGI Symbol;Acc:MGI:2385265]	7	-2.26086	0.00568664	0.413874	3.5898	1.58746
ENSMUSG00000034224	Slc38a8	solute carrier family 38, member 8 [Source:MGI Symbol;Acc:MGI:2685433]	8	4.87558	0.00582558	0.420006	0.218979	1.07681
ENSMUSG00000029090	Adgra3	adhesion G protein-coupled receptor A3 [Source:MGI Symbol;Acc:MGI:1917943]	5	1.35566	0.0058286	0.420006	9.23529	12.5169
ENSMUSG00000021799	Opn4	opsin 4 (melanopsin) [Source:MGI Symbol;Acc:MGI:1353425]	14	2.41546	0.00590917	0.423713	0.968926	2.33966
ENSMUSG00000107402	4732416N19Rik	RIKEN cDNA 4732416N19 gene [Source:MGI Symbol;Acc:MGI:2444634]	6	-5.43657	0.00601125	0.42892	0.572371	0.102945
ENSMUSG00000097309	Gm17249	predicted gene, 17249 [Source:MGI Symbol;Acc:MGI:4936883]	10	-5.1257	0.00616766	0.437934	0.442369	0.0842706
ENSMUSG00000039518	Cdsn	corneodesmosin [Source:MGI Symbol;Acc:MGI:3505689]	17	-2.57358	0.00629836	0.445044	2.67771	1.03887
ENSMUSG00000022763	Aifm3	apoptosis-inducing factor, mitochondrion-associated 3 [Source:MGI Symbol;Acc:MGI:1919418]	16	1.8358	0.00634187	0.445217	1.32933	2.44168
ENSMUSG00000041540	Sox5	SRY (sex determining region Y)-box 5 [Source:MGI Symbol;Acc:MGI:98367]	6	-1.6658	0.006362	0.445217	1.19448	0.717232
ENSMUSG00000115222	Gm49747	predicted gene, 49747 [Source:MGI Symbol;Acc:MGI:6215240]	14	-4.24119	0.00640274	0.445526	0.85657	0.19912
ENSMUSG00000040177	2310057M21Rik	RIKEN cDNA 2310057M21 gene [Source:MGI Symbol;Acc:MGI:1915527]	7	-1.66408	0.00642763	0.445526	1.33781	0.804428
ENSMUSG00000026596	Abl2	v-abl Abelson murine leukemia viral oncogene 2 (arg, Abelson-related gene) [Source:MGI Symbol;Acc:MGI:87860]	1	-1.3853	0.00655444	0.452163	7.84774	5.66564
ENSMUSG00000038943	Prc1	protein regulator of cytokinesis 1 [Source:MGI Symbol;Acc:MGI:1858961]	7	2.09265	0.00681041	0.464523	0.493296	1.03518
ENSMUSG00000090053	Pakap	paralemmin A kinase anchor protein [Source:MGI Symbol;Acc:MGI:5141924]	4	-1.48967	0.00681251	0.464523	12.8927	8.6606
ENSMUSG00000080893	Ndufa12-ps	NADH:ubiquinone oxidoreductase subunit A12, pseudogene [Source:MGI Symbol;Acc:MGI:3801934]	5	4.15402	0.0068914	0.464523	1.32156	5.58172
ENSMUSG00000097979	Gm4691	predicted gene 4691 [Source:MGI Symbol;Acc:MGI:3782871]	6	4.40858	0.00691917	0.464523	0.269445	1.23038
ENSMUSG00000020514	Mrpl22	mitochondrial ribosomal protein L22 [Source:MGI Symbol;Acc:MGI:1333794]	11	-2.01263	0.00694527	0.464523	8.34877	4.14425
ENSMUSG00000109975	Gm19196	predicted gene, 19196 [Source:MGI Symbol;Acc:MGI:5011381]	12	-2.17251	0.0069557	0.464523	13.6536	6.27408
ENSMUSG00000097571	Jpx	Jpx transcript, Xist activator (non-protein coding) [Source:MGI Symbol;Acc:MGI:2180008]	X	-2.72359	0.006957	0.464523	0.656878	0.240908
ENSMUSG00000105703	Gm43305	predicted gene 43305 [Source:MGI Symbol;Acc:MGI:5663442]	14	6.50663	0.00709008	0.468075	0.0741968	0.498764
ENSMUSG00000106432	Gm43259	predicted gene 43259 [Source:MGI Symbol;Acc:MGI:5663396]	3	-3.06395	0.00710182	0.468075	0.911745	0.295505
ENSMUSG00000060275	Nrg2	neuregulin 2 [Source:MGI Symbol;Acc:MGI:1098246]	18	1.43515	0.00710667	0.468075	10.4842	15.0444
ENSMUSG00000022656	Nectin3	nectin cell adhesion molecule 3 [Source:MGI Symbol;Acc:MGI:1930171]	16	1.35856	0.00721307	0.471883	21.0357	28.5782
ENSMUSG00000066026	Dhrs3	dehydrogenase/reductase (SDR family) member 3 [Source:MGI Symbol;Acc:MGI:1315215]	4	1.75036	0.00722931	0.471883	8.14525	14.2534
ENSMUSG00000029864	Gstk1	glutathione S-transferase kappa 1 [Source:MGI Symbol;Acc:MGI:1923513]	6	2.15413	0.00740983	0.479414	3.97099	8.55195
ENSMUSG00000054408	Spcs3	signal peptidase complex subunit 3 homolog (S. cerevisiae) [Source:MGI Symbol;Acc:MGI:1923937]	8	-1.54118	0.00741056	0.479414	13.5575	8.80183
ENSMUSG00000025409	Mbd6	methyl-CpG binding domain protein 6 [Source:MGI Symbol;Acc:MGI:106378]	10	1.39592	0.00749229	0.482556	9.27825	12.9472
ENSMUSG00000073197	5730507C01Rik	RIKEN cDNA 5730507C01 gene [Source:MGI Symbol;Acc:MGI:1917882]	12	-3.5365	0.00770381	0.493994	1.18913	0.334641
ENSMUSG00000059273	Zc3h4	zinc finger CCCH-type containing 4 [Source:MGI Symbol;Acc:MGI:2682314]	7	1.33841	0.00778139	0.49669	8.94496	11.9713
ENSMUSG00000104641	Gm43290	predicted gene 43290 [Source:MGI Symbol;Acc:MGI:5663427]	5	-4.00219	0.0078141	0.49669	1.43676	0.354427
ENSMUSG00000042797	Aqp11	aquaporin 11 [Source:MGI Symbol;Acc:MGI:1913583]	7	2.19701	0.00813232	0.513732	0.295397	0.650697
ENSMUSG00000036959	Bcorl1	BCL6 co-repressor-like 1 [Source:MGI Symbol;Acc:MGI:2443910]	X	1.51142	0.0081528	0.513732	3.27292	4.95
ENSMUSG00000034612	Chst11	carbohydrate sulfotransferase 11 [Source:MGI Symbol;Acc:MGI:1927166]	10	1.76785	0.00819884	0.514406	3.98302	7.04042
ENSMUSG00000109679	Gm45342	predicted gene 45342 [Source:MGI Symbol;Acc:MGI:5791178]	8	-3.66935	0.00830619	0.518905	1.05763	0.28095
ENSMUSG00000029695	Aass	aminoadipate-semialdehyde synthase [Source:MGI Symbol;Acc:MGI:1353573]	6	1.51391	0.0084573	0.522998	5.52945	8.3662
ENSMUSG00000024188	Luc7l	Luc7-like [Source:MGI Symbol;Acc:MGI:1914228]	17	-1.40303	0.00846331	0.522998	12.2516	8.7344
ENSMUSG00000111470	Gm31822	predicted gene, 31822 [Source:MGI Symbol;Acc:MGI:5590981]	10	-3.68297	0.0084795	0.522998	0.698199	0.184968
ENSMUSG00000000628	Hk2	hexokinase 2 [Source:MGI Symbol;Acc:MGI:1315197]	6	-1.33402	0.00855384	0.523574	35.2994	26.4618
ENSMUSG00000001700	Gramd3	GRAM domain containing 3 [Source:MGI Symbol;Acc:MGI:1914815]	18	-1.43936	0.00856078	0.523574	5.68948	3.95406
ENSMUSG00000001034	Mapk7	mitogen-activated protein kinase 7 [Source:MGI Symbol;Acc:MGI:1346347]	11	-1.63683	0.00861909	0.524935	5.49067	3.35816
ENSMUSG00000033256	Shf	Src homology 2 domain containing F [Source:MGI Symbol;Acc:MGI:3613669]	2	1.8729	0.00878222	0.532585	2.44399	4.583
ENSMUSG00000052406	Rexo4	REX4, 3'-5' exonuclease [Source:MGI Symbol;Acc:MGI:2684957]	2	-1.53099	0.0088367	0.532585	5.93703	3.87526
ENSMUSG00000051504	Siglech	sialic acid binding Ig-like lectin H [Source:MGI Symbol;Acc:MGI:2443256]	7	4.5076	0.00885446	0.532585	0.0944878	0.434095
ENSMUSG00000030604	Zfp626	zinc finger protein 626 [Source:MGI Symbol;Acc:MGI:1918413]	7	-2.17701	0.00909876	0.542984	1.63593	0.750608
ENSMUSG00000047281	Sfn	stratifin [Source:MGI Symbol;Acc:MGI:1891831]	4	-2.09387	0.00910196	0.542984	7.25388	3.46627
ENSMUSG00000027427	Polr3f	polymerase (RNA) III (DNA directed) polypeptide F [Source:MGI Symbol;Acc:MGI:1924086]	2	-1.44805	0.00916475	0.544499	3.85829	2.66513
ENSMUSG00000020573	Pik3cg	phosphatidylinositol-4,5-bisphosphate 3-kinase catalytic subunit gamma [Source:MGI Symbol;Acc:MGI:1353576]	12	1.77256	0.00933748	0.550997	1.32687	2.35334
ENSMUSG00000027737	Slc7a11	solute carrier family 7 (cationic amino acid transporter, y+ system), member 11 [Source:MGI Symbol;Acc:MGI:1347355]	3	1.43619	0.00939843	0.550997	16.2672	23.3636
ENSMUSG00000036594	H2-Aa	histocompatibility 2, class II antigen A, alpha [Source:MGI Symbol;Acc:MGI:95895]	17	4.0329	0.00948181	0.550997	0.393991	1.59439
ENSMUSG00000037260	Hgsnat	heparan-alpha-glucosaminide N-acetyltransferase [Source:MGI Symbol;Acc:MGI:1196297]	8	1.58899	0.00951355	0.550997	6.00931	9.55405
ENSMUSG00000006362	Cbfa2t3	CBFA2/RUNX1 translocation partner 3 [Source:MGI Symbol;Acc:MGI:1338013]	8	-1.85944	0.00958442	0.550997	1.32686	0.713365
ENSMUSG00000003752	Itpkc	inositol 1,4,5-trisphosphate 3-kinase C [Source:MGI Symbol;Acc:MGI:2442554]	7	-1.66439	0.00960592	0.550997	3.38543	2.03679
ENSMUSG00000039452	Snx22	sorting nexin 22 [Source:MGI Symbol;Acc:MGI:2685966]	9	2.27504	0.00962522	0.550997	1.07999	2.46191
ENSMUSG00000036661	Dennd3	DENN/MADD domain containing 3 [Source:MGI Symbol;Acc:MGI:2146009]	15	-1.79376	0.00963244	0.550997	3.47125	1.93747
ENSMUSG00000060260	Pwwp2b	PWWP domain containing 2B [Source:MGI Symbol;Acc:MGI:2142008]	7	1.94045	0.00964604	0.550997	0.931999	1.81157
ENSMUSG00000023186	Vwa5a	von Willebrand factor A domain containing 5A [Source:MGI Symbol;Acc:MGI:1915026]	9	-1.34872	0.00965268	0.550997	19.2983	14.3106
ENSMUSG00000074646	6430550D23Rik	RIKEN cDNA 6430550D23 gene [Source:MGI Symbol;Acc:MGI:2443361]	2	-3.48455	0.00978746	0.555574	0.3218	0.0910487
ENSMUSG00000074916	Chst14	carbohydrate sulfotransferase 14 [Source:MGI Symbol;Acc:MGI:1919386]	2	2.01502	0.00980918	0.555574	2.02226	4.08617
ENSMUSG00000036461	Elf1	E74-like factor 1 [Source:MGI Symbol;Acc:MGI:107180]	14	-1.44847	0.0098699	0.556846	5.46968	3.77778
ENSMUSG00000022766	Serpind1	serine (or cysteine) peptidase inhibitor, clade D, member 1 [Source:MGI Symbol;Acc:MGI:96051]	16	-1.63879	0.00996347	0.556895	9.68112	5.90373
ENSMUSG00000031939	Taf1d	TATA-box binding protein associated factor, RNA polymerase I, D [Source:MGI Symbol;Acc:MGI:1922566]	9	-1.4792	0.010017	0.556895	4.92365	3.32612
ENSMUSG00000020623	Map2k6	mitogen-activated protein kinase kinase 6 [Source:MGI Symbol;Acc:MGI:1346870]	11	1.67856	0.0101434	0.556895	3.05191	5.12016
ENSMUSG00000097648	9330185C12Rik	RIKEN cDNA 9330185C12 gene [Source:MGI Symbol;Acc:MGI:1924761]	1	3.57385	0.0101736	0.556895	0.882183	3.17167
ENSMUSG00000035697	Arhgap45	Rho GTPase activating protein 45 [Source:MGI Symbol;Acc:MGI:1917969]	10	4.52323	0.0101813	0.556895	0.0641495	0.29785
ENSMUSG00000031224	Magee2	MAGE family member E2 [Source:MGI Symbol;Acc:MGI:2148316]	X	4.52386	0.0101921	0.556895	0.124033	0.575998
ENSMUSG00000046186	Cd109	CD109 antigen [Source:MGI Symbol;Acc:MGI:2445221]	9	-3.68302	0.0101924	0.556895	0.403265	0.108627
ENSMUSG00000029831	Npvf	neuropeptide VF precursor [Source:MGI Symbol;Acc:MGI:1926488]	6	2.95633	0.0102549	0.556895	2.50477	7.41179
ENSMUSG00000032649	Colgalt2	collagen beta(1-O)galactosyltransferase 2 [Source:MGI Symbol;Acc:MGI:2138232]	1	1.3827	0.0102607	0.556895	12.1049	16.729
ENSMUSG00000026463	Atp2b4	ATPase, Ca++ transporting, plasma membrane 4 [Source:MGI Symbol;Acc:MGI:88111]	1	1.56337	0.0102699	0.556895	2.27236	3.55099
ENSMUSG00000107947	Gm44438	predicted gene, 44438 [Source:MGI Symbol;Acc:MGI:5690830]	6	-3.32401	0.0103102	0.556895	2.47477	0.744435
ENSMUSG00000073888	Ccl27a	chemokine (C-C motif) ligand 27A [Source:MGI Symbol;Acc:MGI:1343459]	4	-2.46862	0.0103299	0.556895	2.58395	1.04467
ENSMUSG00000113346	Eprn	ephemeron, early developmental lncRNA [Source:MGI Symbol;Acc:MGI:3583897]	13	4.64765	0.0104975	0.562199	0.267347	1.27274
ENSMUSG00000023947	Nfkbie	nuclear factor of kappa light polypeptide gene enhancer in B cells inhibitor, epsilon [Source:MGI Symbol;Acc:MGI:1194908]	17	-1.58322	0.0105186	0.562199	12.1205	7.66289
ENSMUSG00000024236	Svil	supervillin [Source:MGI Symbol;Acc:MGI:2147319]	18	1.4856	0.0105441	0.562199	3.17961	4.72336
ENSMUSG00000024293	Esco1	establishment of sister chromatid cohesion N-acetyltransferase 1 [Source:MGI Symbol;Acc:MGI:1925055]	18	-1.4903	0.01062	0.563742	6.72788	4.51257
ENSMUSG00000055799	Tcf7l1	transcription factor 7 like 1 (T cell specific, HMG box) [Source:MGI Symbol;Acc:MGI:1202876]	6	1.30575	0.0107077	0.563742	17.9419	23.4329
ENSMUSG00000050334	C130071C03Rik	RIKEN cDNA C130071C03 gene [Source:MGI Symbol;Acc:MGI:2443574]	13	-3.38699	0.0107542	0.563742	0.328017	0.0944056
ENSMUSG00000039058	Ak5	adenylate kinase 5 [Source:MGI Symbol;Acc:MGI:2677491]	3	4.04491	0.0107586	0.563742	0.129943	0.536094
ENSMUSG00000074358	Ccdc61	coiled-coil domain containing 61 [Source:MGI Symbol;Acc:MGI:2685005]	7	-2.14677	0.0107917	0.563742	2.60522	1.20571
ENSMUSG00000037697	Ddhd1	DDHD domain containing 1 [Source:MGI Symbol;Acc:MGI:2150302]	14	-1.44951	0.0108054	0.563742	2.8422	1.96078
ENSMUSG00000062488	Ifit3b	interferon-induced protein with tetratricopeptide repeats 3B [Source:MGI Symbol;Acc:MGI:3698419]	19	2.48256	0.0108922	0.566238	0.804448	2.0052
ENSMUSG00000045319	Proser2	proline and serine rich 2 [Source:MGI Symbol;Acc:MGI:2442238]	2	1.44969	0.0110589	0.572484	4.60835	6.68092
ENSMUSG00000039693	Msantd3	Myb/SANT-like DNA-binding domain containing 3 [Source:MGI Symbol;Acc:MGI:1913915]	4	-1.57046	0.0111176	0.572484	9.36105	5.95154
ENSMUSG00000068580	Zfyve19	zinc finger, FYVE domain containing 19 [Source:MGI Symbol;Acc:MGI:1919258]	2	1.7288	0.0111303	0.572484	2.59029	4.47723
ENSMUSG00000024287	Thoc1	THO complex 1 [Source:MGI Symbol;Acc:MGI:1919668]	18	-1.57782	0.0112538	0.575186	3.6641	2.32349
ENSMUSG00000029869	Ephb6	Eph receptor B6 [Source:MGI Symbol;Acc:MGI:1096338]	6	1.60981	0.0112619	0.575186	4.06291	6.54438
ENSMUSG00000050222	Il17d	interleukin 17D [Source:MGI Symbol;Acc:MGI:2446510]	14	2.93356	0.0114623	0.583374	0.757601	2.2431
ENSMUSG00000041779	Tram2	translocating chain-associating membrane protein 2 [Source:MGI Symbol;Acc:MGI:1924817]	1	-1.54713	0.0116603	0.589558	3.98308	2.57389
ENSMUSG00000029276	Glmn	glomulin, FKBP associated protein [Source:MGI Symbol;Acc:MGI:2141180]	5	-1.72242	0.0116648	0.589558	6.87115	3.98765
ENSMUSG00000041936	Agrn	agrin [Source:MGI Symbol;Acc:MGI:87961]	4	1.38507	0.0117274	0.590673	6.6653	9.23079
ENSMUSG00000029822	Osbpl3	oxysterol binding protein-like 3 [Source:MGI Symbol;Acc:MGI:1918970]	6	-1.68247	0.0118251	0.5915	4.79548	2.85221
ENSMUSG00000067276	Capn6	calpain 6 [Source:MGI Symbol;Acc:MGI:1100850]	X	2.86279	0.0118251	0.5915	0.401077	1.15015
ENSMUSG00000024843	Chka	choline kinase alpha [Source:MGI Symbol;Acc:MGI:107760]	19	-1.44297	0.0119282	0.594611	9.09039	6.30191
ENSMUSG00000039233	Tbce	tubulin-specific chaperone E [Source:MGI Symbol;Acc:MGI:1917680]	13	-1.60936	0.0120049	0.596395	4.61713	2.86881
ENSMUSG00000055093	Rps27a-ps3	ribosomal protein S27A, pseudogene 3 [Source:MGI Symbol;Acc:MGI:3645406]	6	1.90743	0.0120466	0.596428	10.0246	19.1507
ENSMUSG00000000753	Serpinf1	serine (or cysteine) peptidase inhibitor, clade F, member 1 [Source:MGI Symbol;Acc:MGI:108080]	11	-10.5829	0.0121514	0.599578	5.82251	0.545587
ENSMUSG00000020385	Clk4	CDC like kinase 4 [Source:MGI Symbol;Acc:MGI:1098551]	11	-1.42901	0.0122777	0.603764	7.52929	5.27193
ENSMUSG00000042042	Csgalnact2	chondroitin sulfate N-acetylgalactosaminyltransferase 2 [Source:MGI Symbol;Acc:MGI:1926002]	6	1.7083	0.0123352	0.60455	1.23757	2.11512
ENSMUSG00000102950	Gm37018	predicted gene, 37018 [Source:MGI Symbol;Acc:MGI:5610246]	1	-4.12403	0.0124637	0.60674	0.498265	0.119737
ENSMUSG00000020773	Trim47	tripartite motif-containing 47 [Source:MGI Symbol;Acc:MGI:1917374]	11	-1.55514	0.0124664	0.60674	11.9444	7.68995
ENSMUSG00000019762	Iyd	iodotyrosine deiodinase [Source:MGI Symbol;Acc:MGI:1917587]	10	1.94271	0.0125049	0.60674	4.9905	9.69575
ENSMUSG00000028571	Cyp2j13	cytochrome P450, family 2, subfamily j, polypeptide 13 [Source:MGI Symbol;Acc:MGI:2385197]	4	-2.14285	0.0126661	0.612412	1.72881	0.807601
ENSMUSG00000021281	Tnfaip2	tumor necrosis factor, alpha-induced protein 2 [Source:MGI Symbol;Acc:MGI:104960]	12	-4.46711	0.012706	0.612412	0.689949	0.15368
ENSMUSG00000026674	Ddr2	discoidin domain receptor family, member 2 [Source:MGI Symbol;Acc:MGI:1345277]	1	1.29308	0.0129816	0.623632	15.6566	20.2454
ENSMUSG00000114193	Gm48139	predicted gene, 48139 [Source:MGI Symbol;Acc:MGI:6097504]	13	-3.39071	0.0130844	0.626501	0.795462	0.233394
ENSMUSG00000026547	Tagln2	transgelin 2 [Source:MGI Symbol;Acc:MGI:1312985]	1	-1.54139	0.013165	0.628294	9.40683	6.10793
ENSMUSG00000045930	Clec14a	C-type lectin domain family 14, member a [Source:MGI Symbol;Acc:MGI:1914114]	12	3.22592	0.013272	0.630299	0.369093	1.19378
ENSMUSG00000087157	Sox5os2	SRY (sex determining region Y)-box 5, opposite strand 2 [Source:MGI Symbol;Acc:MGI:3783127]	6	-2.57656	0.0133771	0.630299	8.38882	3.23377
ENSMUSG00000087445	Gm14286	predicted gene 14286 [Source:MGI Symbol;Acc:MGI:3650190]	2	-4.68024	0.0134648	0.630299	6.68775	1.41663
ENSMUSG00000030554	Synm	synemin, intermediate filament protein [Source:MGI Symbol;Acc:MGI:2661187]	7	-1.39308	0.0134727	0.630299	49.9656	35.8697
ENSMUSG00000029810	Tmem176b	transmembrane protein 176B [Source:MGI Symbol;Acc:MGI:1916348]	6	1.38359	0.0134885	0.630299	32.9949	45.6413
ENSMUSG00000035933	Cog5	component of oligomeric golgi complex 5 [Source:MGI Symbol;Acc:MGI:2145130]	12	1.37898	0.0134977	0.630299	5.08899	7.01648
ENSMUSG00000113750	Gm5628	predicted gene 5628 [Source:MGI Symbol;Acc:MGI:3779506]	13	2.71459	0.0135101	0.630299	1.33196	3.64618
ENSMUSG00000026103	Gls	glutaminase [Source:MGI Symbol;Acc:MGI:95752]	1	-1.3203	0.0135847	0.631756	11.7434	8.89432
ENSMUSG00000027381	Bcl2l11	BCL2-like 11 (apoptosis facilitator) [Source:MGI Symbol;Acc:MGI:1197519]	2	-1.41797	0.0136701	0.631809	5.66243	3.99473
ENSMUSG00000044864	Ankrd50	ankyrin repeat domain 50 [Source:MGI Symbol;Acc:MGI:2139777]	3	-1.32506	0.0136727	0.631809	8.62905	6.51396
ENSMUSG00000019851	Perp	PERP, TP53 apoptosis effector [Source:MGI Symbol;Acc:MGI:1929938]	10	-1.31434	0.0138628	0.638565	46.452	35.3307
ENSMUSG00000038508	Gdf15	growth differentiation factor 15 [Source:MGI Symbol;Acc:MGI:1346047]	8	3.00074	0.0139681	0.641388	1.44959	4.3578
ENSMUSG00000022469	Rapgef3	Rap guanine nucleotide exchange factor (GEF) 3 [Source:MGI Symbol;Acc:MGI:2441741]	15	1.42889	0.0140574	0.643456	5.18362	7.40498
ENSMUSG00000044548	Dact1	dishevelled-binding antagonist of beta-catenin 1 [Source:MGI Symbol;Acc:MGI:1891740]	12	-1.59592	0.0141291	0.644711	5.59598	3.50097
ENSMUSG00000035021	Baz1a	bromodomain adjacent to zinc finger domain 1A [Source:MGI Symbol;Acc:MGI:1309478]	12	-1.8441	0.014256	0.648468	1.87513	1.01813
ENSMUSG00000026866	Kynu	kynureninase [Source:MGI Symbol;Acc:MGI:1918039]	2	1.90056	0.0143241	0.6487	0.818788	1.55621
ENSMUSG00000046709	Mapk10	mitogen-activated protein kinase 10 [Source:MGI Symbol;Acc:MGI:1346863]	5	-1.39751	0.0143502	0.6487	3.40829	2.43716
ENSMUSG00000035283	Adrb1	adrenergic receptor, beta 1 [Source:MGI Symbol;Acc:MGI:87937]	19	2.85982	0.0144465	0.651032	0.343804	0.98722
ENSMUSG00000060572	Mfap2	microfibrillar-associated protein 2 [Source:MGI Symbol;Acc:MGI:99559]	4	1.51799	0.0145206	0.652349	13.3358	20.2396
ENSMUSG00000040957	Cables1	CDK5 and Abl enzyme substrate 1 [Source:MGI Symbol;Acc:MGI:1927065]	18	-1.62478	0.0146402	0.653496	9.72879	5.98903
ENSMUSG00000022401	Xpnpep3	X-prolyl aminopeptidase 3, mitochondrial [Source:MGI Symbol;Acc:MGI:2445217]	15	-1.71885	0.0146464	0.653496	1.61604	0.940861
ENSMUSG00000108358	Gm44509	predicted gene 44509 [Source:MGI Symbol;Acc:MGI:5753085]	7	3.13888	0.0147448	0.653496	0.671323	2.12082
ENSMUSG00000022416	Cacna1i	calcium channel, voltage-dependent, alpha 1I subunit [Source:MGI Symbol;Acc:MGI:2178051]	15	1.70264	0.0148585	0.653496	0.906576	1.54223
ENSMUSG00000110161	Gm45494	predicted gene 45494 [Source:MGI Symbol;Acc:MGI:5791330]	9	-3.87692	0.0148747	0.653496	4.75519	1.19755
ENSMUSG00000081824	Ndufs5-ps	NADH:ubiquinone oxidoreductase core subunit S5, pseudogene [Source:MGI Symbol;Acc:MGI:3612445]	16	-5.307	0.0149331	0.653496	11.9343	2.21783
ENSMUSG00000029603	Dtx1	deltex 1, E3 ubiquitin ligase [Source:MGI Symbol;Acc:MGI:1352744]	5	1.34739	0.0149399	0.653496	7.66931	10.3327
ENSMUSG00000024900	Cpt1a	carnitine palmitoyltransferase 1a, liver [Source:MGI Symbol;Acc:MGI:1098296]	19	1.46784	0.0149474	0.653496	7.59529	11.1468
ENSMUSG00000031216	Stard8	START domain containing 8 [Source:MGI Symbol;Acc:MGI:2448556]	X	2.37214	0.0149501	0.653496	0.507854	1.20458
ENSMUSG00000061411	Nol4l	nucleolar protein 4-like [Source:MGI Symbol;Acc:MGI:1918765]	2	1.39375	0.0150992	0.658036	3.09057	4.3104
ENSMUSG00000050377	Il31ra	interleukin 31 receptor A [Source:MGI Symbol;Acc:MGI:2180511]	13	3.17791	0.0151622	0.658809	0.150968	0.481528
ENSMUSG00000023972	Ptk7	PTK7 protein tyrosine kinase 7 [Source:MGI Symbol;Acc:MGI:1918711]	17	1.43369	0.0152461	0.660484	4.39456	6.30043
ENSMUSG00000024431	Nr3c1	nuclear receptor subfamily 3, group C, member 1 [Source:MGI Symbol;Acc:MGI:95824]	18	-1.32795	0.0153394	0.662551	9.34684	7.03991
ENSMUSG00000017929	B4galt5	UDP-Gal:betaGlcNAc beta 1,4-galactosyltransferase, polypeptide 5 [Source:MGI Symbol;Acc:MGI:1927169]	2	-1.70453	0.0155985	0.664888	3.6287	2.12964
ENSMUSG00000060301	2610008E11Rik	RIKEN cDNA 2610008E11 gene [Source:MGI Symbol;Acc:MGI:1919378]	10	-1.6439	0.0156102	0.664888	4.29095	2.61109
ENSMUSG00000021306	Gpr137b	G protein-coupled receptor 137B [Source:MGI Symbol;Acc:MGI:1891463]	13	1.31143	0.0156153	0.664888	13.8595	18.1812
ENSMUSG00000057069	Ero1b	endoplasmic reticulum oxidoreductase 1 beta [Source:MGI Symbol;Acc:MGI:1914725]	13	-2.29606	0.0156891	0.664888	0.647977	0.281484
ENSMUSG00000041771	Slc24a4	solute carrier family 24 (sodium/potassium/calcium exchanger), member 4 [Source:MGI Symbol;Acc:MGI:2447362]	12	-1.4382	0.0157408	0.664888	7.94328	5.52591
ENSMUSG00000108238	Gm43984	predicted gene, 43984 [Source:MGI Symbol;Acc:MGI:5690376]	6	-2.23737	0.0157509	0.664888	2.84052	1.27002
ENSMUSG00000051043	Gprc5c	G protein-coupled receptor, family C, group 5, member C [Source:MGI Symbol;Acc:MGI:1917605]	11	1.3062	0.0157849	0.664888	10.2767	13.4246
ENSMUSG00000051486	Pcdhb11	protocadherin beta 11 [Source:MGI Symbol;Acc:MGI:2136746]	18	1.97177	0.01581	0.664888	0.70323	1.38952
ENSMUSG00000023087	Noct	nocturnin [Source:MGI Symbol;Acc:MGI:109382]	3	-1.66892	0.0158294	0.664888	4.0696	2.43857
ENSMUSG00000020701	Tmem132e	transmembrane protein 132E [Source:MGI Symbol;Acc:MGI:2685490]	11	2.32957	0.0158502	0.664888	0.478439	1.11711
ENSMUSG00000022723	Crybg3	beta-gamma crystallin domain containing 3 [Source:MGI Symbol;Acc:MGI:2676311]	16	1.35477	0.016027	0.668974	20.3994	27.6367
ENSMUSG00000096967	Gm26621	predicted gene, 26621 [Source:MGI Symbol;Acc:MGI:5477115]	15	-3.61953	0.0160613	0.668974	0.703252	0.192325
ENSMUSG00000104586	4921539H07Rik	RIKEN cDNA 4921539H07 gene [Source:MGI Symbol;Acc:MGI:1925506]	3	-3.21567	0.0160855	0.668974	0.435495	0.133408
ENSMUSG00000057219	Armc7	armadillo repeat containing 7 [Source:MGI Symbol;Acc:MGI:2679719]	11	-1.99207	0.0161995	0.671794	2.09346	1.04902
ENSMUSG00000018899	Irf1	interferon regulatory factor 1 [Source:MGI Symbol;Acc:MGI:96590]	11	1.83352	0.0162913	0.673682	6.38977	11.716
ENSMUSG00000020937	Plcd3	phospholipase C, delta 3 [Source:MGI Symbol;Acc:MGI:107451]	11	-1.33289	0.0164009	0.676292	17.7969	13.3519
ENSMUSG00000039232	Stx11	syntaxin 11 [Source:MGI Symbol;Acc:MGI:1921982]	10	-1.59888	0.016472	0.677305	5.2779	3.3054
ENSMUSG00000027803	Wwtr1	WW domain containing transcription regulator 1 [Source:MGI Symbol;Acc:MGI:1917649]	3	-1.30353	0.0165403	0.677964	13.0965	10.0449
ENSMUSG00000068270	Shroom4	shroom family member 4 [Source:MGI Symbol;Acc:MGI:2685570]	X	2.32184	0.0165811	0.677964	0.209367	0.487332
ENSMUSG00000021112	Mpp5	membrane protein, palmitoylated 5 (MAGUK p55 subfamily member 5) [Source:MGI Symbol;Acc:MGI:1927339]	12	-1.31193	0.0168566	0.68667	9.92845	7.56638
ENSMUSG00000034472	Rasd2	RASD family, member 2 [Source:MGI Symbol;Acc:MGI:1922391]	8	-3.11288	0.0168884	0.68667	0.643777	0.205447
ENSMUSG00000046668	Cxxc5	CXXC finger 5 [Source:MGI Symbol;Acc:MGI:1914643]	18	1.30079	0.0169514	0.687311	19.634	25.5375
ENSMUSG00000026701	Prdx6	peroxiredoxin 6 [Source:MGI Symbol;Acc:MGI:894320]	1	1.33498	0.0170617	0.689861	32.6976	43.6483
ENSMUSG00000116582	Gm36169	predicted gene, 36169 [Source:MGI Symbol;Acc:MGI:5595328]	16	3.42035	0.0173508	0.695477	0.552667	1.90179
ENSMUSG00000041633	Kctd12b	potassium channel tetramerisation domain containing 12b [Source:MGI Symbol;Acc:MGI:2444667]	X	2.89257	0.0173664	0.695477	0.283432	0.821204
ENSMUSG00000049532	Sall2	spalt like transcription factor 2 [Source:MGI Symbol;Acc:MGI:1354373]	14	1.38921	0.0173901	0.695477	4.7733	6.63425
ENSMUSG00000021759	Plpp1	phospholipid phosphatase 1 [Source:MGI Symbol;Acc:MGI:108412]	13	1.40686	0.0173917	0.695477	13.0349	18.3472
ENSMUSG00000001918	Slc1a5	solute carrier family 1 (neutral amino acid transporter), member 5 [Source:MGI Symbol;Acc:MGI:105305]	7	-2.10051	0.0174509	0.695934	1.37843	0.654708
ENSMUSG00000053310	Nrgn	neurogranin [Source:MGI Symbol;Acc:MGI:1927184]	9	2.39427	0.0175257	0.697006	1.09657	2.64216
ENSMUSG00000052085	Dock8	dedicator of cytokinesis 8 [Source:MGI Symbol;Acc:MGI:1921396]	19	3.33733	0.0178071	0.703453	0.066358	0.222766
ENSMUSG00000117113	Gm49883	predicted gene, 49883 [Source:MGI Symbol;Acc:MGI:6270565]	17	-1.95894	0.0178294	0.703453	1.71986	0.876291
ENSMUSG00000020806	Rhbdf2	rhomboid 5 homolog 2 [Source:MGI Symbol;Acc:MGI:2442473]	11	-1.38934	0.0178328	0.703453	10.8671	7.82298
ENSMUSG00000073158	9030624G23Rik	RIKEN cDNA 9030624G23 gene [Source:MGI Symbol;Acc:MGI:1914058]	12	-2.85997	0.0179135	0.703521	3.48085	1.2157
ENSMUSG00000020303	Stc2	stanniocalcin 2 [Source:MGI Symbol;Acc:MGI:1316731]	11	2.37481	0.0179312	0.703521	0.335591	0.79779
ENSMUSG00000062960	Kdr	kinase insert domain protein receptor [Source:MGI Symbol;Acc:MGI:96683]	5	2.07525	0.018054	0.705732	0.525943	1.09028
ENSMUSG00000035237	Lcat	lecithin cholesterol acyltransferase [Source:MGI Symbol;Acc:MGI:96755]	8	3.25573	0.0180845	0.705732	0.305994	1.01584
ENSMUSG00000008318	Relt	RELT tumor necrosis factor receptor [Source:MGI Symbol;Acc:MGI:2443373]	7	-1.98784	0.0182039	0.706287	1.93649	0.97287
ENSMUSG00000032121	Tmem218	transmembrane protein 218 [Source:MGI Symbol;Acc:MGI:1913529]	9	-1.4224	0.0182278	0.706287	14.7515	10.3682
ENSMUSG00000050953	Gja1	gap junction protein, alpha 1 [Source:MGI Symbol;Acc:MGI:95713]	10	1.38999	0.0182443	0.706287	31.1594	43.3104
ENSMUSG00000028970	Abcb1b	ATP-binding cassette, sub-family B (MDR/TAP), member 1B [Source:MGI Symbol;Acc:MGI:97568]	5	1.54873	0.0183809	0.707944	2.52269	3.91134
ENSMUSG00000025348	Itga7	integrin alpha 7 [Source:MGI Symbol;Acc:MGI:102700]	10	-2.44647	0.0185091	0.707944	1.59255	0.64977
ENSMUSG00000019139	Isyna1	myo-inositol 1-phosphate synthase A1 [Source:MGI Symbol;Acc:MGI:1919030]	8	1.41781	0.0185249	0.707944	9.72032	13.7885
ENSMUSG00000102428	Pcdhga12	protocadherin gamma subfamily A, 12 [Source:MGI Symbol;Acc:MGI:1935229]	18	-2.0182	0.018591	0.707944	1.67447	0.829847
ENSMUSG00000075254	Heg1	heart development protein with EGF-like domains 1 [Source:MGI Symbol;Acc:MGI:1924696]	16	1.39108	0.0186072	0.707944	7.32635	10.1903
ENSMUSG00000113964	Gm48667	predicted gene, 48667 [Source:MGI Symbol;Acc:MGI:6098285]	12	6.07966	0.0186366	0.707944	2.7504	17.0782
ENSMUSG00000038594	Cep85l	centrosomal protein 85-like [Source:MGI Symbol;Acc:MGI:3642684]	10	-1.6487	0.0187118	0.707944	4.65488	2.82462
ENSMUSG00000023830	Igf2r	insulin-like growth factor 2 receptor [Source:MGI Symbol;Acc:MGI:96435]	17	-1.30484	0.0187203	0.707944	20.6995	15.8661
ENSMUSG00000039763	Dnajc28	DnaJ heat shock protein family (Hsp40) member C28 [Source:MGI Symbol;Acc:MGI:2181053]	16	-2.20234	0.0187248	0.707944	1.23403	0.55829
ENSMUSG00000020364	Zfp354a	zinc finger protein 354A [Source:MGI Symbol;Acc:MGI:103172]	11	-2.53307	0.0188345	0.710245	0.823073	0.321605
ENSMUSG00000001506	Col1a1	collagen, type I, alpha 1 [Source:MGI Symbol;Acc:MGI:88467]	11	-2.50337	0.0188877	0.710412	0.903492	0.358981
ENSMUSG00000045414	Dipk2a	divergent protein kinase domain 2A [Source:MGI Symbol;Acc:MGI:1916111]	9	1.36868	0.0189791	0.710673	10.9674	15.01
ENSMUSG00000005640	Insrr	insulin receptor-related receptor [Source:MGI Symbol;Acc:MGI:1346037]	3	3.26794	0.0189923	0.710673	0.485496	1.58853
ENSMUSG00000047945	Marcksl1	MARCKS-like 1 [Source:MGI Symbol;Acc:MGI:97143]	4	1.4414	0.0193212	0.717267	19.8754	28.6441
ENSMUSG00000098702	1500015A07Rik	RIKEN cDNA 1500015A07 gene [Source:MGI Symbol;Acc:MGI:1916232]	18	-2.76918	0.0193547	0.717267	1.2627	0.454445
ENSMUSG00000034825	Nrip3	nuclear receptor interacting protein 3 [Source:MGI Symbol;Acc:MGI:1925843]	7	2.84399	0.0194559	0.717267	0.308382	0.882124
ENSMUSG00000028655	Mfsd2a	major facilitator superfamily domain containing 2A [Source:MGI Symbol;Acc:MGI:1923824]	4	1.47816	0.0194681	0.717267	9.26065	13.691
ENSMUSG00000071793	2610005L07Rik	RIKEN cDNA 2610005L07 gene [Source:MGI Symbol;Acc:MGI:1914283]	8	-1.71303	0.0194808	0.717267	2.74583	1.60418
ENSMUSG00000045538	Ddx28	DEAD box helicase 28 [Source:MGI Symbol;Acc:MGI:1919236]	8	-1.87355	0.0194852	0.717267	3.57148	1.90465
ENSMUSG00000069808	Tlcd3a	TLC domain containing 3A [Source:MGI Symbol;Acc:MGI:2151840]	11	2.48534	0.0195134	0.717267	0.18546	0.463743
ENSMUSG00000003680	Taf6l	TATA-box binding protein associated factor 6 like [Source:MGI Symbol;Acc:MGI:2444957]	19	1.97728	0.019744	0.717555	0.820898	1.62501
ENSMUSG00000033715	Akr1c14	aldo-keto reductase family 1, member C14 [Source:MGI Symbol;Acc:MGI:2145458]	13	4.26191	0.0197599	0.717555	0.17765	0.763958
ENSMUSG00000024404	Riok3	RIO kinase 3 [Source:MGI Symbol;Acc:MGI:1914128]	18	-1.29393	0.0197674	0.717555	9.323	7.20506
ENSMUSG00000116858	Gm49797	predicted gene, 49797 [Source:MGI Symbol;Acc:MGI:6215329]	17	-2.6859	0.0198004	0.717555	1.09472	0.404994
ENSMUSG00000035284	Vps13c	vacuolar protein sorting 13C [Source:MGI Symbol;Acc:MGI:2444207]	9	1.27095	0.0198949	0.717555	4.79243	6.09133
ENSMUSG00000024190	Dusp1	dual specificity phosphatase 1 [Source:MGI Symbol;Acc:MGI:105120]	17	2.40798	0.0199758	0.717555	18.7318	45.1089
ENSMUSG00000032245	Cln6	ceroid-lipofuscinosis, neuronal 6 [Source:MGI Symbol;Acc:MGI:2159324]	9	1.58473	0.0200315	0.717555	3.78397	6.00089
ENSMUSG00000003032	Klf4	Kruppel-like factor 4 (gut) [Source:MGI Symbol;Acc:MGI:1342287]	4	-1.374	0.0200353	0.717555	25.9867	18.9218
ENSMUSG00000109438	Gm45073	predicted gene 45073 [Source:MGI Symbol;Acc:MGI:5753649]	8	-3.12459	0.0200874	0.717555	1.09153	0.349007
ENSMUSG00000050530	Fam171a1	family with sequence similarity 171, member A1 [Source:MGI Symbol;Acc:MGI:2442917]	2	1.30679	0.0201381	0.717555	10.2465	13.3895
ENSMUSG00000052837	Junb	jun B proto-oncogene [Source:MGI Symbol;Acc:MGI:96647]	8	2.5898	0.020145	0.717555	16.9528	43.9101
ENSMUSG00000024777	Ppp2r5b	protein phosphatase 2, regulatory subunit B', beta [Source:MGI Symbol;Acc:MGI:2388480]	19	-1.28774	0.0201878	0.717555	23.0522	17.8965
ENSMUSG00000059866	Tnip2	TNFAIP3 interacting protein 2 [Source:MGI Symbol;Acc:MGI:2386643]	5	-1.59897	0.0202459	0.717555	7.15971	4.47494
ENSMUSG00000028645	Slc2a1	solute carrier family 2 (facilitated glucose transporter), member 1 [Source:MGI Symbol;Acc:MGI:95755]	4	1.33277	0.0202465	0.717555	176.103	234.701
ENSMUSG00000040841	Six5	sine oculis-related homeobox 5 [Source:MGI Symbol;Acc:MGI:106220]	7	1.48552	0.0203107	0.717555	7.155	10.6306
ENSMUSG00000021458	Aopep	aminopeptidase O [Source:MGI Symbol;Acc:MGI:1919311]	13	-1.75826	0.0203568	0.717555	3.086	1.75572
ENSMUSG00000025453	Nnt	nicotinamide nucleotide transhydrogenase [Source:MGI Symbol;Acc:MGI:109279]	13	-4.8473	0.0203593	0.717555	0.304054	0.0622589
ENSMUSG00000022377	Asap1	ArfGAP with SH3 domain, ankyrin repeat and PH domain1 [Source:MGI Symbol;Acc:MGI:1342335]	15	-1.41837	0.0205338	0.720383	37.1201	26.1734
ENSMUSG00000020423	Btg2	BTG anti-proliferation factor 2 [Source:MGI Symbol;Acc:MGI:108384]	1	2.27154	0.0205385	0.720383	27.6202	62.7447
ENSMUSG00000037321	Tap1	transporter 1, ATP-binding cassette, sub-family B (MDR/TAP) [Source:MGI Symbol;Acc:MGI:98483]	17	2.07232	0.0206293	0.721826	0.613251	1.27401
ENSMUSG00000031217	Efnb1	ephrin B1 [Source:MGI Symbol;Acc:MGI:102708]	X	1.3502	0.0207168	0.723151	16.5128	22.2983
ENSMUSG00000021773	Comtd1	catechol-O-methyltransferase domain containing 1 [Source:MGI Symbol;Acc:MGI:1916406]	14	2.46052	0.0209613	0.728219	0.947655	2.34245
ENSMUSG00000027220	Syt13	synaptotagmin XIII [Source:MGI Symbol;Acc:MGI:1933945]	2	3.19246	0.0209621	0.728219	0.209273	0.673374
ENSMUSG00000026643	Nmt2	N-myristoyltransferase 2 [Source:MGI Symbol;Acc:MGI:1202298]	2	-1.32213	0.0210265	0.728718	10.4441	7.90394
ENSMUSG00000025898	Cwf19l2	CWF19-like 2, cell cycle control (S. pombe) [Source:MGI Symbol;Acc:MGI:1918023]	9	-1.39295	0.0211024	0.729269	6.26074	4.49448
ENSMUSG00000025006	Sorbs1	sorbin and SH3 domain containing 1 [Source:MGI Symbol;Acc:MGI:700014]	19	-1.33272	0.0211595	0.729269	11.337	8.50795
ENSMUSG00000027849	Syt6	synaptotagmin VI [Source:MGI Symbol;Acc:MGI:1859544]	3	-3.6109	0.0211927	0.729269	0.352668	0.0946551
ENSMUSG00000037661	Gpr160	G protein-coupled receptor 160 [Source:MGI Symbol;Acc:MGI:1919112]	3	-1.42827	0.0213621	0.729315	6.37226	4.46297
ENSMUSG00000042428	Mgat3	mannoside acetylglucosaminyltransferase 3 [Source:MGI Symbol;Acc:MGI:104532]	15	1.43374	0.0213696	0.729315	6.38226	9.14612
ENSMUSG00000032737	Inppl1	inositol polyphosphate phosphatase-like 1 [Source:MGI Symbol;Acc:MGI:1333787]	7	1.29238	0.0215494	0.729315	14.1111	18.2377
ENSMUSG00000047515	BC049715	cDNA sequence BC049715 [Source:MGI Symbol;Acc:MGI:3605234]	6	-3.2987	0.021612	0.729315	0.338305	0.1023
ENSMUSG00000036099	Vezt	vezatin, adherens junctions transmembrane protein [Source:MGI Symbol;Acc:MGI:2143698]	10	-1.51157	0.0216227	0.729315	1.89109	1.25179
ENSMUSG00000010097	Nxf1	nuclear RNA export factor 1 [Source:MGI Symbol;Acc:MGI:1858330]	19	-1.2988	0.0216803	0.729315	16.6882	12.8498
ENSMUSG00000034551	Hdx	highly divergent homeobox [Source:MGI Symbol;Acc:MGI:2685226]	X	-2.21551	0.0216809	0.729315	0.806302	0.364321
ENSMUSG00000018923	Med11	mediator complex subunit 11 [Source:MGI Symbol;Acc:MGI:1913422]	11	2.11771	0.0217182	0.729315	2.45177	5.21226
ENSMUSG00000022556	Hsf1	heat shock factor 1 [Source:MGI Symbol;Acc:MGI:96238]	15	-1.3662	0.0217881	0.729315	5.18716	3.79693
ENSMUSG00000069272	H2ac8	H2A clustered histone 8 [Source:MGI Symbol;Acc:MGI:2448290]	13	3.56833	0.0218441	0.729315	1.01832	3.69313
ENSMUSG00000038022	Mindy4	MINDY lysine 48 deubiquitinase 4 [Source:MGI Symbol;Acc:MGI:3583959]	6	-1.65681	0.021881	0.729315	2.51785	1.51632
ENSMUSG00000024665	Fads2	fatty acid desaturase 2 [Source:MGI Symbol;Acc:MGI:1930079]	19	1.30532	0.0219392	0.729315	22.8571	29.8305
ENSMUSG00000042279	H1f8	H1.8 linker histone [Source:MGI Symbol;Acc:MGI:2176207]	6	-3.15317	0.0219836	0.729315	2.33186	0.736458
ENSMUSG00000039117	Taf4	TATA-box binding protein associated factor 4 [Source:MGI Symbol;Acc:MGI:2152346]	2	1.3681	0.0219954	0.729315	5.33141	7.29195
ENSMUSG00000024411	Aqp4	aquaporin 4 [Source:MGI Symbol;Acc:MGI:107387]	18	1.31152	0.0221107	0.729315	23.0386	30.2127
ENSMUSG00000034663	Bmp2k	BMP2 inducible kinase [Source:MGI Symbol;Acc:MGI:2155456]	5	-1.31394	0.0221236	0.729315	9.71721	7.39785
ENSMUSG00000028370	Pappa	pregnancy-associated plasma protein A [Source:MGI Symbol;Acc:MGI:97479]	4	-1.40052	0.0221471	0.729315	4.71656	3.36585
ENSMUSG00000044921	Rassf9	Ras association (RalGDS/AF-6) domain family (N-terminal) member 9 [Source:MGI Symbol;Acc:MGI:2384307]	10	5.29456	0.0221527	0.729315	0.0783741	0.42125
ENSMUSG00000038840	Birc7	baculoviral IAP repeat-containing 7 (livin) [Source:MGI Symbol;Acc:MGI:2676458]	2	3.01726	0.022195	0.729315	1.58478	4.79497
ENSMUSG00000034687	Fras1	Fraser extracellular matrix complex subunit 1 [Source:MGI Symbol;Acc:MGI:2385368]	5	1.6257	0.0222462	0.729315	3.91379	6.36227
ENSMUSG00000069310	H3c3	H3 clustered histone 3 [Source:MGI Symbol;Acc:MGI:2448320]	13	3.07284	0.0222462	0.729315	1.04556	3.25151
ENSMUSG00000016128	Stard13	StAR-related lipid transfer (START) domain containing 13 [Source:MGI Symbol;Acc:MGI:2385331]	5	-1.53493	0.0223821	0.731676	4.21334	2.74554
ENSMUSG00000001768	Rin2	Ras and Rab interactor 2 [Source:MGI Symbol;Acc:MGI:1921280]	2	1.37852	0.0224253	0.731676	4.46901	6.15876
ENSMUSG00000040663	Clcf1	cardiotrophin-like cytokine factor 1 [Source:MGI Symbol;Acc:MGI:1930088]	19	-2.04588	0.0225819	0.731676	3.24765	1.58772
ENSMUSG00000034064	Poglut1	protein O-glucosyltransferase 1 [Source:MGI Symbol;Acc:MGI:2444232]	16	1.40135	0.022605	0.731676	4.18846	5.87352
ENSMUSG00000072946	Ptgr2	prostaglandin reductase 2 [Source:MGI Symbol;Acc:MGI:1916372]	12	1.41508	0.022699	0.731676	4.41106	6.24342
ENSMUSG00000036291	Ap5m1	adaptor-related protein complex 5, mu 1 subunit [Source:MGI Symbol;Acc:MGI:1921635]	14	-1.64232	0.022729	0.731676	1.51815	0.923856
ENSMUSG00000021360	Gcnt2	glucosaminyl (N-acetyl) transferase 2, I-branching enzyme [Source:MGI Symbol;Acc:MGI:1100870]	13	-1.97172	0.0227447	0.731676	1.03147	0.524102
ENSMUSG00000036030	Prtg	protogenin [Source:MGI Symbol;Acc:MGI:2444710]	9	1.42574	0.0227552	0.731676	2.09189	2.98454
ENSMUSG00000024620	Pdgfrb	platelet derived growth factor receptor, beta polypeptide [Source:MGI Symbol;Acc:MGI:97531]	18	1.27056	0.0227945	0.731676	27.2682	34.6473
ENSMUSG00000029657	Hsph1	heat shock 105kDa/110kDa protein 1 [Source:MGI Symbol;Acc:MGI:105053]	5	-1.287	0.0228212	0.731676	12.3516	9.59929
ENSMUSG00000098374	Gm28043	predicted gene, 28043 [Source:MGI Symbol;Acc:MGI:5547779]	17	-3.49526	0.0228801	0.731676	0.301973	0.0859024
ENSMUSG00000017817	Jph2	junctophilin 2 [Source:MGI Symbol;Acc:MGI:1891496]	2	1.3403	0.0229241	0.731676	11.0035	14.7467
ENSMUSG00000050700	Emilin3	elastin microfibril interfacer 3 [Source:MGI Symbol;Acc:MGI:2389142]	2	1.3908	0.0230171	0.731676	14.7878	20.5665
ENSMUSG00000060538	Tmem219	transmembrane protein 219 [Source:MGI Symbol;Acc:MGI:1915992]	7	-1.70948	0.0230219	0.731676	5.57794	3.26699
ENSMUSG00000027859	Ngf	nerve growth factor [Source:MGI Symbol;Acc:MGI:97321]	3	-5.05916	0.0231817	0.735148	2.99315	0.588019
ENSMUSG00000031072	LTO1	ABCE maturation factor [Source:MGI Symbol;Acc:MGI:1919534]	7	-1.58008	0.0234034	0.735743	2.35439	1.49029
ENSMUSG00000064115	Cadm2	cell adhesion molecule 2 [Source:MGI Symbol;Acc:MGI:2442722]	16	1.30559	0.0234627	0.735743	13.543	17.6795
ENSMUSG00000068706	Gm10250	predicted pseudogene 10250 [Source:MGI Symbol;Acc:MGI:3642408]	15	-3.07803	0.0234747	0.735743	3.74163	1.1956
ENSMUSG00000023921	Mmut	methylmalonyl-Coenzyme A mutase [Source:MGI Symbol;Acc:MGI:97239]	17	1.47037	0.0235383	0.735743	5.94497	8.73538
ENSMUSG00000025757	Hspa4l	heat shock protein 4 like [Source:MGI Symbol;Acc:MGI:107422]	3	-1.28515	0.0235576	0.735743	8.31837	6.47036
ENSMUSG00000085862	Gm13483	predicted gene 13483 [Source:MGI Symbol;Acc:MGI:3651423]	2	-3.00117	0.0235671	0.735743	1.31028	0.434558
ENSMUSG00000036834	Plch1	phospholipase C, eta 1 [Source:MGI Symbol;Acc:MGI:2683547]	3	1.54928	0.0235995	0.735743	3.72056	5.76275
ENSMUSG00000023191	P3h3	prolyl 3-hydroxylase 3 [Source:MGI Symbol;Acc:MGI:1315208]	6	1.60553	0.0236048	0.735743	3.50938	5.63522
ENSMUSG00000044550	Tceal3	transcription elongation factor A (SII)-like 3 [Source:MGI Symbol;Acc:MGI:1913354]	X	1.37352	0.0236763	0.736395	6.01997	8.27226
ENSMUSG00000037419	Endod1	endonuclease domain containing 1 [Source:MGI Symbol;Acc:MGI:1919196]	9	1.31053	0.0238392	0.73983	10.2265	13.3975
ENSMUSG00000017144	Rnd3	Rho family GTPase 3 [Source:MGI Symbol;Acc:MGI:1921444]	2	-1.31909	0.0238884	0.73983	13.5314	10.2604
ENSMUSG00000020021	Fgd6	FYVE, RhoGEF and PH domain containing 6 [Source:MGI Symbol;Acc:MGI:1261419]	10	-1.95364	0.0242374	0.749042	1.16215	0.594233
ENSMUSG00000042350	Arel1	apoptosis resistant E3 ubiquitin protein ligase 1 [Source:MGI Symbol;Acc:MGI:1915747]	12	1.30185	0.0244572	0.75178	7.24468	9.42841
ENSMUSG00000091405	H4c14	H4 clustered histone 14 [Source:MGI Symbol;Acc:MGI:2140113]	3	1.60229	0.024498	0.75178	4.58871	7.35362
ENSMUSG00000024498	Tcerg1	transcription elongation regulator 1 (CA150) [Source:MGI Symbol;Acc:MGI:1926421]	18	-1.27786	0.0245108	0.75178	16.8393	13.1807
ENSMUSG00000050931	Sgms2	sphingomyelin synthase 2 [Source:MGI Symbol;Acc:MGI:1921692]	3	-1.89624	0.0245677	0.75178	1.16164	0.613543
ENSMUSG00000024924	Vldlr	very low density lipoprotein receptor [Source:MGI Symbol;Acc:MGI:98935]	19	1.3906	0.0245842	0.75178	3.49717	4.8615
ENSMUSG00000008932	Slc1a7	solute carrier family 1 (glutamate transporter), member 7 [Source:MGI Symbol;Acc:MGI:2444087]	4	-2.33284	0.0246593	0.752498	1.19098	0.508764
ENSMUSG00000024972	Lgals12	lectin, galactose binding, soluble 12 [Source:MGI Symbol;Acc:MGI:1929094]	19	3.71448	0.025017	0.76048	0.172782	0.649843
ENSMUSG00000020538	Srebf1	sterol regulatory element binding transcription factor 1 [Source:MGI Symbol;Acc:MGI:107606]	11	1.29185	0.0250254	0.76048	59.5714	76.9576
ENSMUSG00000042688	Mapk6	mitogen-activated protein kinase 6 [Source:MGI Symbol;Acc:MGI:1354946]	9	-1.28468	0.0251223	0.761834	11.0956	8.6378
ENSMUSG00000045062	Pcdhb7	protocadherin beta 7 [Source:MGI Symbol;Acc:MGI:2136741]	18	2.48825	0.02528	0.765022	0.388078	0.969963
ENSMUSG00000021474	Sfxn1	sideroflexin 1 [Source:MGI Symbol;Acc:MGI:2137677]	13	-1.32557	0.0254088	0.767162	4.37352	3.29751
ENSMUSG00000028613	Lrp8	low density lipoprotein receptor-related protein 8, apolipoprotein e receptor [Source:MGI Symbol;Acc:MGI:1340044]	4	-1.49967	0.0254561	0.767162	2.2601	1.50593
ENSMUSG00000039478	Micu3	mitochondrial calcium uptake family, member 3 [Source:MGI Symbol;Acc:MGI:1925756]	8	-1.78875	0.025662	0.770657	1.962	1.09686
ENSMUSG00000116895	Gm3435	predicted gene 3435 [Source:MGI Symbol;Acc:MGI:3810125]	17	-2.72838	0.025678	0.770657	1.40359	0.512766
ENSMUSG00000032702	Kank1	KN motif and ankyrin repeat domains 1 [Source:MGI Symbol;Acc:MGI:2147707]	19	1.45491	0.0257939	0.772544	4.06347	5.9081
ENSMUSG00000027401	Tgm3	transglutaminase 3, E polypeptide [Source:MGI Symbol;Acc:MGI:98732]	2	3.27596	0.0258627	0.773014	0.100063	0.331828
ENSMUSG00000034751	Mast4	microtubule associated serine/threonine kinase family member 4 [Source:MGI Symbol;Acc:MGI:1918885]	13	-1.26985	0.0260043	0.775219	4.12192	3.24629
ENSMUSG00000105340	Gm42878	predicted gene 42878 [Source:MGI Symbol;Acc:MGI:5663015]	5	-3.04097	0.0261144	0.775219	0.668773	0.21928
ENSMUSG00000022272	Myo10	myosin X [Source:MGI Symbol;Acc:MGI:107716]	15	1.42396	0.0261464	0.775219	6.95354	9.89861
ENSMUSG00000074384	AI429214	expressed sequence AI429214 [Source:MGI Symbol;Acc:MGI:2142538]	8	-2.57994	0.0261583	0.775219	1.85276	0.719482
ENSMUSG00000028344	Invs	inversin [Source:MGI Symbol;Acc:MGI:1335082]	4	1.45545	0.0262047	0.775219	1.90478	2.7719
ENSMUSG00000102752	Gm7694	predicted gene 7694 [Source:MGI Symbol;Acc:MGI:3649135]	1	1.35627	0.0263022	0.775219	10.7824	14.6153
ENSMUSG00000000567	Sox9	SRY (sex determining region Y)-box 9 [Source:MGI Symbol;Acc:MGI:98371]	11	-1.43897	0.0263263	0.775219	47.9359	33.3169
ENSMUSG00000039476	Prrx2	paired related homeobox 2 [Source:MGI Symbol;Acc:MGI:98218]	2	2.29525	0.0263626	0.775219	0.918557	2.11521
ENSMUSG00000041837	Pdcd7	programmed cell death 7 [Source:MGI Symbol;Acc:MGI:1859170]	9	-1.41502	0.0267206	0.783009	26.2042	18.516
ENSMUSG00000015312	Gadd45b	growth arrest and DNA-damage-inducible 45 beta [Source:MGI Symbol;Acc:MGI:107776]	10	1.59938	0.026735	0.783009	15.3005	24.48
ENSMUSG00000050730	Arhgap42	Rho GTPase activating protein 42 [Source:MGI Symbol;Acc:MGI:1918794]	9	-1.44852	0.0268683	0.784988	2.87364	1.98271
ENSMUSG00000035696	Rnf38	ring finger protein 38 [Source:MGI Symbol;Acc:MGI:1920719]	4	-1.2985	0.0269105	0.784988	6.55834	5.05212
ENSMUSG00000042155	Klhl23	kelch-like 23 [Source:MGI Symbol;Acc:MGI:2683536]	2	1.99474	0.0271622	0.790745	0.891752	1.77772
ENSMUSG00000006373	Pgrmc1	progesterone receptor membrane component 1 [Source:MGI Symbol;Acc:MGI:1858305]	X	1.29138	0.0273097	0.79296	40.7072	52.559
ENSMUSG00000061877	BC048679	cDNA sequence BC048679 [Source:MGI Symbol;Acc:MGI:3510776]	7	1.57674	0.0273472	0.79296	13.9106	21.9582
ENSMUSG00000036057	Ptpn23	protein tyrosine phosphatase, non-receptor type 23 [Source:MGI Symbol;Acc:MGI:2144837]	9	-1.25101	0.0275132	0.796187	18.0509	14.4288
ENSMUSG00000025789	St8sia2	ST8 alpha-N-acetyl-neuraminide alpha-2,8-sialyltransferase 2 [Source:MGI Symbol;Acc:MGI:106020]	7	1.40069	0.0276163	0.797584	6.51681	9.12804
ENSMUSG00000023150	Ivns1abp	influenza virus NS1A binding protein [Source:MGI Symbol;Acc:MGI:2152389]	1	-1.32574	0.0277223	0.799062	222.419	167.773
ENSMUSG00000034936	Arl4d	ADP-ribosylation factor-like 4D [Source:MGI Symbol;Acc:MGI:1933155]	11	-1.50089	0.0280248	0.803809	16.7044	11.1348
ENSMUSG00000030559	Rab38	RAB38, member RAS oncogene family [Source:MGI Symbol;Acc:MGI:1919683]	7	1.75627	0.0280269	0.803809	4.35861	7.6505
ENSMUSG00000029060	Mib2	mindbomb E3 ubiquitin protein ligase 2 [Source:MGI Symbol;Acc:MGI:2679684]	4	1.46524	0.0280527	0.803809	3.85871	5.65721
ENSMUSG00000020650	Bcap29	B cell receptor associated protein 29 [Source:MGI Symbol;Acc:MGI:101917]	12	1.41794	0.0281722	0.805648	2.39614	3.39805
ENSMUSG00000057440	Mpp7	membrane protein, palmitoylated 7 (MAGUK p55 subfamily member 7) [Source:MGI Symbol;Acc:MGI:1922989]	18	1.46868	0.0282974	0.806057	0.953663	1.40212
ENSMUSG00000003812	Dnase2a	deoxyribonuclease II alpha [Source:MGI Symbol;Acc:MGI:1329019]	8	1.75017	0.0283912	0.806057	0.924931	1.62011
ENSMUSG00000027254	Map1a	microtubule-associated protein 1 A [Source:MGI Symbol;Acc:MGI:1306776]	2	1.30201	0.028401	0.806057	6.43091	8.37099
ENSMUSG00000007458	M6pr	mannose-6-phosphate receptor, cation dependent [Source:MGI Symbol;Acc:MGI:96904]	6	1.29195	0.028408	0.806057	11.4517	14.7907
ENSMUSG00000025608	Podxl	podocalyxin-like [Source:MGI Symbol;Acc:MGI:1351317]	6	1.29053	0.0284639	0.806071	20.6882	26.6982
ENSMUSG00000021701	Plk2	polo like kinase 2 [Source:MGI Symbol;Acc:MGI:1099790]	13	-1.60882	0.0285775	0.807718	6.4469	4.01193
ENSMUSG00000034826	Nup54	nucleoporin 54 [Source:MGI Symbol;Acc:MGI:1920460]	5	-1.48238	0.0286901	0.809129	5.77194	3.89381
ENSMUSG00000001555	Fkbp10	FK506 binding protein 10 [Source:MGI Symbol;Acc:MGI:104769]	11	1.28595	0.0287447	0.809129	19.2377	24.7444
ENSMUSG00000020160	Meis1	Meis homeobox 1 [Source:MGI Symbol;Acc:MGI:104717]	11	1.3442	0.0288241	0.809129	2.4529	3.29661
ENSMUSG00000032462	Pik3cb	phosphatidylinositol-4,5-bisphosphate 3-kinase catalytic subunit beta [Source:MGI Symbol;Acc:MGI:1922019]	9	-1.45598	0.0288832	0.809129	3.88182	2.66621
ENSMUSG00000040584	Abcb1a	ATP-binding cassette, sub-family B (MDR/TAP), member 1A [Source:MGI Symbol;Acc:MGI:97570]	5	1.99982	0.0289073	0.809129	0.525318	1.05058
ENSMUSG00000020593	Lpin1	lipin 1 [Source:MGI Symbol;Acc:MGI:1891340]	12	-1.302	0.0290092	0.809129	5.59791	4.29946
ENSMUSG00000038859	Baiap2l1	BAI1-associated protein 2-like 1 [Source:MGI Symbol;Acc:MGI:1914148]	5	-1.76176	0.0290655	0.809129	2.78897	1.58423
ENSMUSG00000002983	Relb	avian reticuloendotheliosis viral (v-rel) oncogene related B [Source:MGI Symbol;Acc:MGI:103289]	7	-1.49819	0.0290722	0.809129	5.09582	3.40413
ENSMUSG00000108143	Gm44414	predicted gene, 44414 [Source:MGI Symbol;Acc:MGI:5690806]	6	-2.79463	0.0291899	0.810746	0.728311	0.255429
ENSMUSG00000026042	Col5a2	collagen, type V, alpha 2 [Source:MGI Symbol;Acc:MGI:88458]	1	-2.7999	0.0293045	0.810746	0.207221	0.0728234
ENSMUSG00000039774	Galnt12	polypeptide N-acetylgalactosaminyltransferase 12 [Source:MGI Symbol;Acc:MGI:2444664]	4	1.76653	0.0295288	0.810746	2.31407	4.08659
ENSMUSG00000052981	Ube2ql1	ubiquitin-conjugating enzyme E2Q family-like 1 [Source:MGI Symbol;Acc:MGI:1924230]	13	1.88771	0.0295309	0.810746	1.24348	2.35482
ENSMUSG00000107461	Gm44045	predicted gene, 44045 [Source:MGI Symbol;Acc:MGI:5690437]	6	-3.87699	0.029543	0.810746	0.76621	0.195582
ENSMUSG00000105677	Gm43328	predicted gene 43328 [Source:MGI Symbol;Acc:MGI:5663465]	3	-3.06479	0.029568	0.810746	1.54618	0.502201
ENSMUSG00000027221	Chst1	carbohydrate sulfotransferase 1 [Source:MGI Symbol;Acc:MGI:1924219]	2	2.06132	0.0296354	0.810746	1.1105	2.28786
ENSMUSG00000056091	St3gal5	ST3 beta-galactoside alpha-2,3-sialyltransferase 5 [Source:MGI Symbol;Acc:MGI:1339963]	6	1.28022	0.0297752	0.810746	34.1702	43.7385
ENSMUSG00000025959	Klf7	Kruppel-like factor 7 (ubiquitous) [Source:MGI Symbol;Acc:MGI:1935151]	1	-1.41038	0.0298675	0.810746	4.31324	3.05903
ENSMUSG00000112404	Gm32442	predicted gene, 32442 [Source:MGI Symbol;Acc:MGI:5591601]	12	3.19825	0.0298834	0.810746	0.169058	0.5455
ENSMUSG00000063524	Eno1	enolase 1, alpha non-neuron [Source:MGI Symbol;Acc:MGI:95393]	4	1.29453	0.0298893	0.810746	168.977	218.745
ENSMUSG00000027806	Tsc22d2	TSC22 domain family, member 2 [Source:MGI Symbol;Acc:MGI:1919283]	3	-1.31214	0.0299162	0.810746	17.8115	13.5756
ENSMUSG00000051323	Pcdh19	protocadherin 19 [Source:MGI Symbol;Acc:MGI:2685563]	X	1.36385	0.0299808	0.810746	3.47467	4.74006
ENSMUSG00000027939	Nup210l	nucleoporin 210-like [Source:MGI Symbol;Acc:MGI:1924845]	3	-2.37878	0.0300136	0.810746	0.692978	0.291415
ENSMUSG00000103898	Gm30238	predicted gene, 30238 [Source:MGI Symbol;Acc:MGI:5589397]	12	-3.18725	0.0301326	0.810746	0.643204	0.199052
ENSMUSG00000022206	Npr3	natriuretic peptide receptor 3 [Source:MGI Symbol;Acc:MGI:97373]	15	1.58264	0.0301516	0.810746	1.01686	1.60915
ENSMUSG00000100967	Gm29666	predicted gene 29666 [Source:MGI Symbol;Acc:MGI:5580372]	15	-3.16391	0.0302074	0.810746	0.196491	0.0617836
ENSMUSG00000022175	Lrp10	low-density lipoprotein receptor-related protein 10 [Source:MGI Symbol;Acc:MGI:1929480]	14	1.26838	0.0302217	0.810746	21.0787	26.7411
ENSMUSG00000028634	Hivep3	human immunodeficiency virus type I enhancer binding protein 3 [Source:MGI Symbol;Acc:MGI:106589]	4	1.59459	0.0302427	0.810746	0.561012	0.893554
ENSMUSG00000021868	Ppif	peptidylprolyl isomerase F (cyclophilin F) [Source:MGI Symbol;Acc:MGI:2145814]	14	1.72578	0.030446	0.810746	1.18041	2.039
ENSMUSG00000086849	Gm13840	predicted gene 13840 [Source:MGI Symbol;Acc:MGI:3649479]	5	-3.17354	0.0305001	0.810746	6.33964	1.94101
ENSMUSG00000028394	Pole3	polymerase (DNA directed), epsilon 3 (p17 subunit) [Source:MGI Symbol;Acc:MGI:1933378]	4	-1.29869	0.0305115	0.810746	22.7991	17.5499
ENSMUSG00000029561	Oasl2	2'-5' oligoadenylate synthetase-like 2 [Source:MGI Symbol;Acc:MGI:1344390]	5	2.37428	0.0305281	0.810746	0.448567	1.0671
ENSMUSG00000025733	Rhot2	ras homolog family member T2 [Source:MGI Symbol;Acc:MGI:2384892]	17	1.58764	0.0305698	0.810746	2.3607	3.74563
ENSMUSG00000028364	Tnc	tenascin C [Source:MGI Symbol;Acc:MGI:101922]	4	-5.40527	0.0305836	0.810746	1.18911	0.218371
ENSMUSG00000039741	Bahcc1	BAH domain and coiled-coil containing 1 [Source:MGI Symbol;Acc:MGI:2679272]	11	1.27227	0.0306686	0.810746	6.33945	8.06374
ENSMUSG00000119895	U1	U1 spliceosomal RNA [Source:RFAM;Acc:RF00003]	12	1.82156	0.0307861	0.810746	44.1507	80.3219
ENSMUSG00000053080	2700081O15Rik	RIKEN cDNA 2700081O15 gene [Source:MGI Symbol;Acc:MGI:1919667]	19	1.51664	0.0308108	0.810746	3.40423	5.16461
ENSMUSG00000038463	Olfml2b	olfactomedin-like 2B [Source:MGI Symbol;Acc:MGI:2443310]	1	1.45167	0.0309018	0.810746	4.95543	7.19801
ENSMUSG00000084291	Gm6654	predicted pseudogene 6654 [Source:MGI Symbol;Acc:MGI:3648118]	6	-2.43834	0.030908	0.810746	6.5882	2.68376
ENSMUSG00000025245	Lztfl1	leucine zipper transcription factor-like 1 [Source:MGI Symbol;Acc:MGI:1934860]	9	-1.408	0.0309198	0.810746	2.33032	1.65632
ENSMUSG00000028480	Glipr2	GLI pathogenesis-related 2 [Source:MGI Symbol;Acc:MGI:1917770]	4	-1.63854	0.0309877	0.810746	5.38023	3.28696
ENSMUSG00000107116	Gm43274	predicted gene 43274 [Source:MGI Symbol;Acc:MGI:5663411]	5	-2.14817	0.0310198	0.810746	0.992956	0.462189
ENSMUSG00000108940	Gm45719	predicted gene 45719 [Source:MGI Symbol;Acc:MGI:5804834]	7	-2.65629	0.031024	0.810746	1.23175	0.456016
ENSMUSG00000028688	Toe1	target of EGR1, member 1 (nuclear) [Source:MGI Symbol;Acc:MGI:1915526]	4	1.6449	0.0312668	0.815626	2.06705	3.40313
ENSMUSG00000041986	Elmod1	ELMO/CED-12 domain containing 1 [Source:MGI Symbol;Acc:MGI:3583900]	9	1.24411	0.0313447	0.816196	20.0544	24.9541
ENSMUSG00000006154	Eps8l1	EPS8-like 1 [Source:MGI Symbol;Acc:MGI:1914675]	7	-3.00209	0.0314677	0.816722	0.460024	0.1528
ENSMUSG00000103706	6820402A03Rik	RIKEN cDNA 6820402A03 gene [Source:MGI Symbol;Acc:MGI:1922992]	1	-3.52768	0.0314771	0.816722	1.03215	0.288929
ENSMUSG00000026709	Dars2	aspartyl-tRNA synthetase 2 (mitochondrial) [Source:MGI Symbol;Acc:MGI:2442510]	1	2.07346	0.0316812	0.819505	0.581348	1.20509
ENSMUSG00000032782	Cntrob	centrobin, centrosomal BRCA2 interacting protein [Source:MGI Symbol;Acc:MGI:2443290]	11	1.83315	0.031697	0.819505	1.00242	1.83608
ENSMUSG00000032000	Birc3	baculoviral IAP repeat-containing 3 [Source:MGI Symbol;Acc:MGI:1197007]	9	-1.71091	0.0317845	0.820312	1.82253	1.06425
ENSMUSG00000024097	Srsf7	serine and arginine-rich splicing factor 7 [Source:MGI Symbol;Acc:MGI:1926232]	17	-1.32643	0.0322262	0.827196	12.6892	9.57044
ENSMUSG00000036390	Gadd45a	growth arrest and DNA-damage-inducible 45 alpha [Source:MGI Symbol;Acc:MGI:107799]	6	-1.50118	0.0322493	0.827196	15.0371	10.0114
ENSMUSG00000035936	Aldh5a1	aldhehyde dehydrogenase family 5, subfamily A1 [Source:MGI Symbol;Acc:MGI:2441982]	13	-1.69823	0.0322975	0.827196	1.99425	1.17106
ENSMUSG00000046743	Fat4	FAT atypical cadherin 4 [Source:MGI Symbol;Acc:MGI:3045256]	3	1.54297	0.032315	0.827196	31.5722	48.7146
ENSMUSG00000027244	Atg13	autophagy related 13 [Source:MGI Symbol;Acc:MGI:1196429]	2	1.31884	0.0324176	0.827196	11.1254	14.6739
ENSMUSG00000062480	Acat3	acetyl-Coenzyme A acetyltransferase 3 [Source:MGI Symbol;Acc:MGI:109182]	17	-3.09047	0.032454	0.827196	0.734486	0.232273
ENSMUSG00000044393	Dsg2	desmoglein 2 [Source:MGI Symbol;Acc:MGI:1196466]	18	2.65299	0.032503	0.827196	1.01569	2.69533
ENSMUSG00000001089	Luzp1	leucine zipper protein 1 [Source:MGI Symbol;Acc:MGI:107629]	4	-1.28453	0.0325688	0.827196	14.8433	11.555
ENSMUSG00000022537	Tmem44	transmembrane protein 44 [Source:MGI Symbol;Acc:MGI:1924489]	16	2.13153	0.0326721	0.827196	0.226623	0.483757
ENSMUSG00000064043	Trerf1	transcriptional regulating factor 1 [Source:MGI Symbol;Acc:MGI:2442086]	17	1.34869	0.0326856	0.827196	3.94354	5.31976
ENSMUSG00000110928	Gm48114	predicted gene, 48114 [Source:MGI Symbol;Acc:MGI:6097467]	9	-2.35577	0.0327108	0.827196	1.45264	0.615869
ENSMUSG00000029095	Ablim2	actin-binding LIM protein 2 [Source:MGI Symbol;Acc:MGI:2385758]	5	1.95789	0.0327758	0.827196	0.364414	0.714807
ENSMUSG00000042284	Itga1	integrin alpha 1 [Source:MGI Symbol;Acc:MGI:96599]	13	2.19766	0.0327901	0.827196	0.107164	0.23555
ENSMUSG00000001521	Tulp3	tubby-like protein 3 [Source:MGI Symbol;Acc:MGI:1329045]	6	1.2588	0.0328647	0.827645	6.77737	8.53193
ENSMUSG00000043822	Adamtsl5	ADAMTS-like 5 [Source:MGI Symbol;Acc:MGI:1913798]	10	-1.82184	0.0329224	0.827665	1.36318	0.748628
ENSMUSG00000025355	Mmp19	matrix metallopeptidase 19 [Source:MGI Symbol;Acc:MGI:1927899]	10	1.87459	0.0330189	0.828247	0.902015	1.69358
ENSMUSG00000032232	Cgnl1	cingulin-like 1 [Source:MGI Symbol;Acc:MGI:1915428]	9	1.28255	0.0330989	0.828247	41.7173	53.5018
ENSMUSG00000020811	Wscd1	WSC domain containing 1 [Source:MGI Symbol;Acc:MGI:2448493]	11	1.68204	0.0331162	0.828247	2.25928	3.80149
ENSMUSG00000086322	E130218I03Rik	RIKEN cDNA E130218I03 gene [Source:MGI Symbol;Acc:MGI:3528958]	4	1.27991	0.0332742	0.83077	59.2707	75.868
ENSMUSG00000024043	Arhgap28	Rho GTPase activating protein 28 [Source:MGI Symbol;Acc:MGI:2147003]	17	-1.42512	0.0333646	0.831601	7.22011	5.06861
ENSMUSG00000050332	Amer1	APC membrane recruitment 1 [Source:MGI Symbol;Acc:MGI:1919595]	X	-1.36189	0.0334719	0.832573	4.03231	2.96061
ENSMUSG00000022106	Rcbtb2	regulator of chromosome condensation (RCC1) and BTB (POZ) domain containing protein 2 [Source:MGI Symbol;Acc:MGI:1917200]	14	1.38084	0.033518	0.832573	2.27638	3.14463
ENSMUSG00000028689	Ccdc163	coiled-coil domain containing 163 [Source:MGI Symbol;Acc:MGI:1915644]	4	2.97886	0.0335889	0.832913	0.295585	0.894776
ENSMUSG00000035674	Ndufa3	NADH:ubiquinone oxidoreductase subunit A3 [Source:MGI Symbol;Acc:MGI:1913341]	7	-1.4602	0.0336851	0.833063	19.7774	13.5448
ENSMUSG00000020130	Tbc1d15	TBC1 domain family, member 15 [Source:MGI Symbol;Acc:MGI:1913937]	10	-1.29563	0.0337817	0.833063	10.8982	8.41116
ENSMUSG00000053870	Fpgt	fucose-1-phosphate guanylyltransferase [Source:MGI Symbol;Acc:MGI:1922790]	3	-1.61234	0.0339098	0.833063	1.93443	1.1975
ENSMUSG00000108077	6330415B21Rik	RIKEN cDNA 6330415B21 gene [Source:MGI Symbol;Acc:MGI:1918003]	6	-2.98621	0.0339436	0.833063	1.73616	0.579778
ENSMUSG00000033706	Smyd5	SET and MYND domain containing 5 [Source:MGI Symbol;Acc:MGI:108048]	6	-1.47759	0.0339619	0.833063	3.76285	2.54939
ENSMUSG00000104273	A530064N14Rik	RIKEN cDNA A530064N14 gene [Source:MGI Symbol;Acc:MGI:3028068]	9	-2.75813	0.0339847	0.833063	3.35515	1.20821
ENSMUSG00000032563	Mrpl3	mitochondrial ribosomal protein L3 [Source:MGI Symbol;Acc:MGI:2137204]	9	-1.33741	0.0340878	0.833063	6.10015	4.56094
ENSMUSG00000030861	Acadsb	acyl-Coenzyme A dehydrogenase, short/branched chain [Source:MGI Symbol;Acc:MGI:1914135]	7	1.28715	0.0341731	0.833063	11.2798	14.5174
ENSMUSG00000037003	Tns2	tensin 2 [Source:MGI Symbol;Acc:MGI:2387586]	15	1.30493	0.0343386	0.833063	13.4081	17.4938
ENSMUSG00000045328	Cenpe	centromere protein E [Source:MGI Symbol;Acc:MGI:1098230]	3	1.76798	0.0343573	0.833063	0.497594	0.881559
ENSMUSG00000118292	Gm10549	predicted gene 10549 [Source:MGI Symbol;Acc:MGI:3641986]	18	2.62449	0.0343581	0.833063	0.330074	0.868318
ENSMUSG00000035805	Mlc1	megalencephalic leukoencephalopathy with subcortical cysts 1 homolog (human) [Source:MGI Symbol;Acc:MGI:2157910]	15	1.41253	0.0344188	0.833063	11.0505	15.5985
ENSMUSG00000016181	Utp25	UTP25 small subunit processome component [Source:MGI Symbol;Acc:MGI:2138080]	1	-1.78026	0.0344361	0.833063	1.70765	0.958715
ENSMUSG00000071654	Uqcc3	ubiquinol-cytochrome c reductase complex assembly factor 3 [Source:MGI Symbol;Acc:MGI:2147553]	19	1.77128	0.0344523	0.833063	7.49871	13.2846
ENSMUSG00000025785	Exosc7	exosome component 7 [Source:MGI Symbol;Acc:MGI:1913696]	9	-1.66367	0.0344534	0.833063	1.65762	0.995305
ENSMUSG00000025732	Mcrip2	MAPK regulated corepressor interacting protein 2 [Source:MGI Symbol;Acc:MGI:1915491]	17	2.67	0.0346142	0.834246	0.963841	2.59046
ENSMUSG00000031904	Slc7a6	solute carrier family 7 (cationic amino acid transporter, y+ system), member 6 [Source:MGI Symbol;Acc:MGI:2142598]	8	-1.39415	0.0346404	0.834246	7.57528	5.43958
ENSMUSG00000021775	Nr1d2	nuclear receptor subfamily 1, group D, member 2 [Source:MGI Symbol;Acc:MGI:2449205]	14	-1.3198	0.0347901	0.834246	16.7126	12.6629
ENSMUSG00000019726	Lyst	lysosomal trafficking regulator [Source:MGI Symbol;Acc:MGI:107448]	13	1.25468	0.0349462	0.834246	4.0709	5.10933
ENSMUSG00000038256	Bcl9	B cell CLL/lymphoma 9 [Source:MGI Symbol;Acc:MGI:1924828]	3	1.34306	0.0350044	0.834246	3.63699	4.88557
ENSMUSG00000035910	Dcdc2a	doublecortin domain containing 2a [Source:MGI Symbol;Acc:MGI:2652818]	13	-2.2166	0.0350381	0.834246	0.451169	0.203091
ENSMUSG00000043964	Orai3	ORAI calcium release-activated calcium modulator 3 [Source:MGI Symbol;Acc:MGI:3039586]	7	1.65044	0.0350503	0.834246	2.73682	4.52526
ENSMUSG00000025602	Zfp202	zinc finger protein 202 [Source:MGI Symbol;Acc:MGI:1933401]	9	-1.99898	0.0350671	0.834246	1.55466	0.779412
ENSMUSG00000059355	Wdr83os	WD repeat domain 83 opposite strand [Source:MGI Symbol;Acc:MGI:3041257]	8	1.48703	0.0351353	0.834246	12.193	18.1248
ENSMUSG00000041596	Nlrp5-ps	NLR family, pyrin domain containing 5, pseudogene [Source:MGI Symbol;Acc:MGI:5010941]	7	-1.55585	0.0351546	0.834246	4.53862	2.91841
ENSMUSG00000023913	Pla2g7	phospholipase A2, group VII (platelet-activating factor acetylhydrolase, plasma) [Source:MGI Symbol;Acc:MGI:1351327]	17	1.50563	0.0351858	0.834246	4.73441	7.12302
ENSMUSG00000050954	Zfp169	zinc finger protein 169 [Source:MGI Symbol;Acc:MGI:1915161]	13	-1.60905	0.0351901	0.834246	1.82951	1.1364
ENSMUSG00000048497	Mmgt2	membrane magnesium transporter 2 [Source:MGI Symbol;Acc:MGI:2448491]	11	1.58821	0.0352642	0.834643	1.33365	2.11967
ENSMUSG00000102816	Gm37814	predicted gene, 37814 [Source:MGI Symbol;Acc:MGI:5611042]	2	-2.26389	0.0353769	0.835136	1.56732	0.69105
ENSMUSG00000046079	Lrrc8d	leucine rich repeat containing 8D [Source:MGI Symbol;Acc:MGI:1922368]	5	-1.39488	0.0353998	0.835136	3.24351	2.32609
ENSMUSG00000111104	Gm8512	predicted gene 8512 [Source:MGI Symbol;Acc:MGI:3648240]	10	-4.11063	0.0354664	0.835354	7.73546	1.86666
ENSMUSG00000047804	Akap10	A kinase (PRKA) anchor protein 10 [Source:MGI Symbol;Acc:MGI:1890218]	11	-1.38019	0.0357592	0.840891	4.39356	3.18256
ENSMUSG00000017861	Mybl2	myeloblastosis oncogene-like 2 [Source:MGI Symbol;Acc:MGI:101785]	2	-2.21983	0.0358618	0.841672	0.85814	0.385984
ENSMUSG00000035713	Usp35	ubiquitin specific peptidase 35 [Source:MGI Symbol;Acc:MGI:2685339]	7	1.74661	0.0359363	0.841672	0.874056	1.52995
ENSMUSG00000044674	Fzd1	frizzled class receptor 1 [Source:MGI Symbol;Acc:MGI:1196625]	5	1.37959	0.0360075	0.841672	14.8542	20.4902
ENSMUSG00000021477	Ctsl	cathepsin L [Source:MGI Symbol;Acc:MGI:88564]	13	1.28743	0.036052	0.841672	256.879	330.716
ENSMUSG00000042745	Id1	inhibitor of DNA binding 1, HLH protein [Source:MGI Symbol;Acc:MGI:96396]	2	1.41666	0.0360956	0.841672	20.1418	28.5556
ENSMUSG00000037206	Islr	immunoglobulin superfamily containing leucine-rich repeat [Source:MGI Symbol;Acc:MGI:1349645]	9	1.25156	0.0361567	0.841672	40.628	50.8456
ENSMUSG00000030109	Slc6a12	solute carrier family 6 (neurotransmitter transporter, betaine/GABA), member 12 [Source:MGI Symbol;Acc:MGI:95628]	6	3.28024	0.0362014	0.841672	0.961844	3.16106
ENSMUSG00000026837	Col5a1	collagen, type V, alpha 1 [Source:MGI Symbol;Acc:MGI:88457]	2	1.49246	0.0363	0.841672	5.08163	7.58209
ENSMUSG00000059839	Zfp874b	zinc finger protein 874b [Source:MGI Symbol;Acc:MGI:3040702]	13	-1.91145	0.036404	0.841672	1.54786	0.809747
ENSMUSG00000038517	Tbkbp1	TBK1 binding protein 1 [Source:MGI Symbol;Acc:MGI:1920424]	11	2.5668	0.0364239	0.841672	0.369782	0.956383
ENSMUSG00000050071	Bex1	brain expressed X-linked 1 [Source:MGI Symbol;Acc:MGI:1328321]	X	1.52418	0.0365033	0.841672	9.53525	14.523
ENSMUSG00000045312	Lhfpl2	lipoma HMGIC fusion partner-like 2 [Source:MGI Symbol;Acc:MGI:2145236]	13	-1.27739	0.0365256	0.841672	21.7967	17.0648
ENSMUSG00000105179	Gm42866	predicted gene 42866 [Source:MGI Symbol;Acc:MGI:5663003]	5	-3.13138	0.036721	0.841672	1.14029	0.364425
ENSMUSG00000026211	Obsl1	obscurin-like 1 [Source:MGI Symbol;Acc:MGI:2138628]	1	1.44876	0.0367312	0.841672	1.55963	2.26133
ENSMUSG00000053730	Tmem39b	transmembrane protein 39b [Source:MGI Symbol;Acc:MGI:2682939]	4	2.11908	0.0367994	0.841672	0.7163	1.52088
ENSMUSG00000089824	Rbm12	RNA binding motif protein 12 [Source:MGI Symbol;Acc:MGI:1922960]	2	-1.52152	0.0368571	0.841672	2.3907	1.57179
ENSMUSG00000020415	Pttg1	pituitary tumor-transforming gene 1 [Source:MGI Symbol;Acc:MGI:1353578]	11	2.14269	0.0369707	0.841672	2.25342	4.8289
ENSMUSG00000103916	Gm38071	predicted gene, 38071 [Source:MGI Symbol;Acc:MGI:5611299]	16	-2.67445	0.0370054	0.841672	0.594214	0.220669
ENSMUSG00000037573	Tob1	transducer of ErbB-2.1 [Source:MGI Symbol;Acc:MGI:1349721]	11	1.25652	0.0370117	0.841672	56.0709	70.4581
ENSMUSG00000061740	Cyp2d22	cytochrome P450, family 2, subfamily d, polypeptide 22 [Source:MGI Symbol;Acc:MGI:1929474]	15	1.40928	0.0372779	0.841672	3.85031	5.42825
ENSMUSG00000031595	Pdgfrl	platelet-derived growth factor receptor-like [Source:MGI Symbol;Acc:MGI:1916047]	8	-2.47533	0.0372977	0.841672	1.98745	0.799452
ENSMUSG00000022704	Qtrt2	queuine tRNA-ribosyltransferase accessory subunit 2 [Source:MGI Symbol;Acc:MGI:1922194]	16	-1.70618	0.0373443	0.841672	2.30269	1.35035
ENSMUSG00000024787	Snx15	sorting nexin 15 [Source:MGI Symbol;Acc:MGI:1916274]	19	1.73649	0.0373972	0.841672	1.89178	3.29165
ENSMUSG00000042608	Stk40	serine/threonine kinase 40 [Source:MGI Symbol;Acc:MGI:1921428]	4	-1.42493	0.0374366	0.841672	6.96369	4.88672
ENSMUSG00000095041			JH584304.1	-1.52951	0.0374562	0.841672	34.9567	22.8559
ENSMUSG00000054723	Vmac	vimentin-type intermediate filament associated coiled-coil protein [Source:MGI Symbol;Acc:MGI:2146912]	17	1.61674	0.0375002	0.841672	3.75172	6.06734
ENSMUSG00000010095	Slc3a2	solute carrier family 3 (activators of dibasic and neutral amino acid transport), member 2 [Source:MGI Symbol;Acc:MGI:96955]	19	1.25615	0.0375142	0.841672	104.549	131.329
ENSMUSG00000025047	Pdcd11	programmed cell death 11 [Source:MGI Symbol;Acc:MGI:1341788]	19	1.31226	0.0375681	0.841672	3.06299	4.01855
ENSMUSG00000087373	Gm15892	predicted gene 15892 [Source:MGI Symbol;Acc:MGI:3801833]	11	-3.18069	0.0376986	0.841672	1.50361	0.47081
ENSMUSG00002076173			16	-1.398	0.0377087	0.841672	7717.79	5520.58
ENSMUSG00000047606	Ankrd34c	ankyrin repeat domain 34C [Source:MGI Symbol;Acc:MGI:2685617]	9	1.46323	0.0378397	0.841672	3.06939	4.49107
ENSMUSG00000038233	Gask1a	golgi associated kinase 1A [Source:MGI Symbol;Acc:MGI:3041196]	9	2.0015	0.0379149	0.841672	0.590239	1.18388
ENSMUSG00000027944	Hax1	HCLS1 associated X-1 [Source:MGI Symbol;Acc:MGI:1346319]	3	1.53439	0.0379228	0.841672	5.95391	9.13541
ENSMUSG00000013089	Etv5	ets variant 5 [Source:MGI Symbol;Acc:MGI:1096867]	16	-1.2704	0.0379428	0.841672	25.6871	20.2178
ENSMUSG00000035992	Fnip1	folliculin interacting protein 1 [Source:MGI Symbol;Acc:MGI:2444668]	11	-1.35307	0.0379455	0.841672	5.75214	4.25101
ENSMUSG00000087231	E230016M11Rik	RIKEN cDNA E230016M11 gene [Source:MGI Symbol;Acc:MGI:2443524]	6	-1.70032	0.0379664	0.841672	3.46119	2.03556
ENSMUSG00000003068	Stk11	serine/threonine kinase 11 [Source:MGI Symbol;Acc:MGI:1341870]	10	-1.24838	0.037975	0.841672	18.2521	14.6186
ENSMUSG00000039419	Cntnap2	contactin associated protein-like 2 [Source:MGI Symbol;Acc:MGI:1914047]	6	1.56577	0.0381747	0.841672	1.27501	1.99549
ENSMUSG00000103085	Gm38120	predicted gene, 38120 [Source:MGI Symbol;Acc:MGI:5611348]	1	-2.31258	0.0381965	0.841672	1.48827	0.644112
ENSMUSG00000039385	Cdh6	cadherin 6 [Source:MGI Symbol;Acc:MGI:107435]	15	2.92411	0.0382848	0.841672	0.278884	0.816222
ENSMUSG00000036295	Lrrn3	leucine rich repeat protein 3, neuronal [Source:MGI Symbol;Acc:MGI:106036]	12	2.5828	0.0382953	0.841672	0.245557	0.637289
ENSMUSG00000107109	Gm42571	predicted gene 42571 [Source:MGI Symbol;Acc:MGI:5662708]	5	-3.29006	0.0382965	0.841672	0.612691	0.182967
ENSMUSG00000034427	Myo15b	myosin XVB [Source:MGI Symbol;Acc:MGI:2685534]	11	-3.58156	0.038314	0.841672	0.133413	0.0367625
ENSMUSG00000041000	Trim62	tripartite motif-containing 62 [Source:MGI Symbol;Acc:MGI:1914775]	4	1.88494	0.0383865	0.841672	0.675739	1.27703
ENSMUSG00000030493	Faap24	Fanconi anemia core complex associated protein 24 [Source:MGI Symbol;Acc:MGI:2142208]	7	-2.46725	0.0384266	0.841672	1.06021	0.426059
ENSMUSG00000037172	Dennd11	DENN domain containing 11 [Source:MGI Symbol;Acc:MGI:2444256]	6	1.26876	0.0385134	0.841672	5.70204	7.23567
ENSMUSG00000027784	Ppm1l	protein phosphatase 1 (formerly 2C)-like [Source:MGI Symbol;Acc:MGI:2139740]	3	1.45782	0.038534	0.841672	1.59775	2.32766
ENSMUSG00000030465	Psd3	pleckstrin and Sec7 domain containing 3 [Source:MGI Symbol;Acc:MGI:1918215]	8	-1.26696	0.038568	0.841672	8.53284	6.7352
ENSMUSG00000030600	Lrfn1	leucine rich repeat and fibronectin type III domain containing 1 [Source:MGI Symbol;Acc:MGI:2136810]	7	1.74465	0.038652	0.841849	1.12029	1.9548
ENSMUSG00000025612	Bach1	BTB and CNC homology 1, basic leucine zipper transcription factor 1 [Source:MGI Symbol;Acc:MGI:894680]	16	-1.379	0.0387312	0.841849	8.17592	5.93249
ENSMUSG00000008129	Brme1	break repair meiotic recombinase recruitment factor 1 [Source:MGI Symbol;Acc:MGI:1921916]	8	2.69216	0.0387496	0.841849	0.247144	0.676646
ENSMUSG00000022952	Runx1	runt related transcription factor 1 [Source:MGI Symbol;Acc:MGI:99852]	16	-3.39613	0.0388764	0.842353	2.02021	0.594468
ENSMUSG00000029231	Pdgfra	platelet derived growth factor receptor, alpha polypeptide [Source:MGI Symbol;Acc:MGI:97530]	5	1.4291	0.0388885	0.842353	17.5853	25.1316
ENSMUSG00000021763	Cspg4b	chondroitin sulfate proteoglycan 4B [Source:MGI Symbol;Acc:MGI:3040697]	13	1.28555	0.0389992	0.842881	5.13207	6.59452
ENSMUSG00000004069	Dnaja3	DnaJ heat shock protein family (Hsp40) member A3 [Source:MGI Symbol;Acc:MGI:1933786]	16	1.32866	0.0390287	0.842881	7.9754	10.6008
ENSMUSG00000070576	Mn1	meningioma 1 [Source:MGI Symbol;Acc:MGI:1261813]	5	1.48058	0.0392063	0.843617	2.17268	3.2179
ENSMUSG00000047022	Mipol1	mirror-image polydactyly 1 [Source:MGI Symbol;Acc:MGI:1920740]	12	-1.43263	0.0392207	0.843617	1.97273	1.37713
ENSMUSG00000027257	Pacsin3	protein kinase C and casein kinase substrate in neurons 3 [Source:MGI Symbol;Acc:MGI:1891410]	2	1.36455	0.0392367	0.843617	6.59722	9.00779
ENSMUSG00000056418	BC043934	cDNA sequence BC043934 [Source:MGI Symbol;Acc:MGI:2679715]	9	1.64674	0.0394531	0.845933	3.20187	5.26764
ENSMUSG00000092183	4930515G01Rik	RIKEN cDNA 4930515G01 gene [Source:MGI Symbol;Acc:MGI:1914892]	5	-3.32393	0.0394606	0.845933	0.806154	0.239817
ENSMUSG00000035914	Cd276	CD276 antigen [Source:MGI Symbol;Acc:MGI:2183926]	9	1.41835	0.0395853	0.847359	6.8703	9.75562
ENSMUSG00000024912	Fosl1	fos-like antigen 1 [Source:MGI Symbol;Acc:MGI:107179]	19	-2.36357	0.0396909	0.848267	16.0202	6.7802
ENSMUSG00000003531	Dgcr6	DiGeorge syndrome critical region gene 6 [Source:MGI Symbol;Acc:MGI:1202877]	16	-1.35771	0.0397443	0.848267	8.90764	6.55987
ENSMUSG00000025352	Gdf11	growth differentiation factor 11 [Source:MGI Symbol;Acc:MGI:1338027]	10	1.40037	0.0398734	0.849776	8.0313	11.252
ENSMUSG00000062444	Ap3b2	adaptor-related protein complex 3, beta 2 subunit [Source:MGI Symbol;Acc:MGI:1100869]	7	1.25344	0.0399412	0.849977	13.1979	16.542
ENSMUSG00000001761	Smo	smoothened, frizzled class receptor [Source:MGI Symbol;Acc:MGI:108075]	6	1.24986	0.0400567	0.850625	20.5636	25.7057
ENSMUSG00000022635	Zcrb1	zinc finger CCHC-type and RNA binding motif 1 [Source:MGI Symbol;Acc:MGI:1914447]	15	-1.2797	0.0401979	0.850625	28.6663	22.3924
ENSMUSG00000020014	Cfap54	cilia and flagella associated protein 54 [Source:MGI Symbol;Acc:MGI:1922208]	10	3.25571	0.0402705	0.850625	0.462302	1.5064
ENSMUSG00000001507	Itga3	integrin alpha 3 [Source:MGI Symbol;Acc:MGI:96602]	11	1.24593	0.0402872	0.850625	32.8767	40.961
ENSMUSG00000009741	Ubp1	upstream binding protein 1 [Source:MGI Symbol;Acc:MGI:104889]	9	-1.38774	0.0403546	0.850625	11.9797	8.63549
ENSMUSG00000000489	Pdgfb	platelet derived growth factor, B polypeptide [Source:MGI Symbol;Acc:MGI:97528]	15	-3.34516	0.0404779	0.850625	0.660866	0.196135
ENSMUSG00000028945	Rheb	Ras homolog enriched in brain [Source:MGI Symbol;Acc:MGI:97912]	5	-1.31867	0.0405111	0.850625	4.31644	3.27316
ENSMUSG00000026014	Raph1	Ras association (RalGDS/AF-6) and pleckstrin homology domains 1 [Source:MGI Symbol;Acc:MGI:1924550]	1	-1.34385	0.0406021	0.850625	1.64054	1.22163
ENSMUSG00000051855	Mest	mesoderm specific transcript [Source:MGI Symbol;Acc:MGI:96968]	6	1.32234	0.0406059	0.850625	14.7171	19.46
ENSMUSG00000048416	Mlf1	myeloid leukemia factor 1 [Source:MGI Symbol;Acc:MGI:1341819]	3	2.69959	0.0406534	0.850625	0.346874	0.952188
ENSMUSG00000087049	Bach2it1	BTB and CNC homology 2, intronic transcript 1 [Source:MGI Symbol;Acc:MGI:3651084]	4	-2.62949	0.0406643	0.850625	5.40869	2.0564
ENSMUSG00000028036	Ptgfr	prostaglandin F receptor [Source:MGI Symbol;Acc:MGI:97796]	3	-2.5713	0.0407317	0.850625	0.406264	0.157202
ENSMUSG00000041763	Tpp2	tripeptidyl peptidase II [Source:MGI Symbol;Acc:MGI:102724]	1	-1.30009	0.0408122	0.850625	5.18698	3.99058
ENSMUSG00000015843	Rxrg	retinoid X receptor gamma [Source:MGI Symbol;Acc:MGI:98216]	1	-1.33462	0.0408169	0.850625	19.9581	14.9623
ENSMUSG00000038526	Car14	carbonic anhydrase 14 [Source:MGI Symbol;Acc:MGI:1344341]	3	1.28722	0.0408482	0.850625	41.2234	53.0638
ENSMUSG00000002320	Tm9sf1	transmembrane 9 superfamily member 1 [Source:MGI Symbol;Acc:MGI:1921390]	14	1.31873	0.0410399	0.851672	7.624	10.0595
ENSMUSG00000038630	Zkscan16	zinc finger with KRAB and SCAN domains 16 [Source:MGI Symbol;Acc:MGI:3510405]	4	2.09885	0.0411062	0.851672	0.962331	2.02071
ENSMUSG00000042734	Ttc9	tetratricopeptide repeat domain 9 [Source:MGI Symbol;Acc:MGI:1916730]	12	-2.86271	0.0411158	0.851672	0.664937	0.22916
ENSMUSG00000021367	Edn1	endothelin 1 [Source:MGI Symbol;Acc:MGI:95283]	13	1.9742	0.0411326	0.851672	2.29985	4.53856
ENSMUSG00000050777	Tmem37	transmembrane protein 37 [Source:MGI Symbol;Acc:MGI:2157899]	1	1.40951	0.0413455	0.854072	14.7767	20.8149
ENSMUSG00000027217	Tspan18	tetraspanin 18 [Source:MGI Symbol;Acc:MGI:1917186]	2	1.37316	0.0413658	0.854072	2.10642	2.89459
ENSMUSG00000115099	1700087I21Rik	RIKEN cDNA 1700087I21 gene [Source:MGI Symbol;Acc:MGI:1923869]	14	1.93046	0.0416423	0.856427	0.937763	1.80887
ENSMUSG00000031828	Klhl36	kelch-like 36 [Source:MGI Symbol;Acc:MGI:2385305]	8	1.5775	0.0417914	0.856427	3.28106	5.17248
ENSMUSG00000019878	Hsf2	heat shock factor 2 [Source:MGI Symbol;Acc:MGI:96239]	10	-1.42209	0.0418073	0.856427	3.44468	2.42262
ENSMUSG00000053641	Dennd4a	DENN/MADD domain containing 4A [Source:MGI Symbol;Acc:MGI:2142979]	9	-1.26996	0.0418227	0.856427	4.07969	3.21375
ENSMUSG00000022139	Mbnl2	muscleblind like splicing factor 2 [Source:MGI Symbol;Acc:MGI:2145597]	14	-1.27244	0.0418343	0.856427	12.9364	10.1688
ENSMUSG00000039960	Rhou	ras homolog family member U [Source:MGI Symbol;Acc:MGI:1916831]	8	-1.34213	0.0419026	0.856427	20.0162	14.9152
ENSMUSG00000024232	Bambi	BMP and activin membrane-bound inhibitor [Source:MGI Symbol;Acc:MGI:1915260]	18	1.88783	0.0419177	0.856427	1.91097	3.60723
ENSMUSG00000036412	Arsi	arylsulfatase i [Source:MGI Symbol;Acc:MGI:2670959]	18	1.26729	0.0419723	0.856427	70.3745	89.1904
ENSMUSG00000027559	Car3	carbonic anhydrase 3 [Source:MGI Symbol;Acc:MGI:88270]	3	-4.77391	0.0420999	0.856427	1.42579	0.292481
ENSMUSG00000020547	Bzw2	basic leucine zipper and W2 domains 2 [Source:MGI Symbol;Acc:MGI:1914162]	12	-1.54735	0.0421294	0.856427	2.26629	1.46422
ENSMUSG00000049489	Ccnq	cyclin Q [Source:MGI Symbol;Acc:MGI:1916359]	11	1.64261	0.0421776	0.856427	5.39657	8.86651
ENSMUSG00000005514	Por	P450 (cytochrome) oxidoreductase [Source:MGI Symbol;Acc:MGI:97744]	5	1.259	0.0422538	0.856427	16.5931	20.8903
ENSMUSG00000036523	Greb1	gene regulated by estrogen in breast cancer protein [Source:MGI Symbol;Acc:MGI:2149712]	12	2.87338	0.0423363	0.856427	0.541778	1.55805
ENSMUSG00000028581	Laptm5	lysosomal-associated protein transmembrane 5 [Source:MGI Symbol;Acc:MGI:108046]	4	3.83798	0.0423668	0.856427	0.261052	1.00774
ENSMUSG00000061527	Krt5	keratin 5 [Source:MGI Symbol;Acc:MGI:96702]	15	-7.07867	0.0424434	0.856427	3.18133	0.442624
ENSMUSG00000019970	Sgk1	serum/glucocorticoid regulated kinase 1 [Source:MGI Symbol;Acc:MGI:1340062]	10	-1.3632	0.0424805	0.856427	24.7787	18.1759
ENSMUSG00000040563	Plppr2	phospholipid phosphatase related 2 [Source:MGI Symbol;Acc:MGI:2384575]	9	1.64015	0.0425003	0.856427	3.36529	5.52365
ENSMUSG00000034063	4930590J08Rik	RIKEN cDNA 4930590J08 gene [Source:MGI Symbol;Acc:MGI:2685917]	6	-2.88655	0.0425389	0.856427	0.873062	0.300398
ENSMUSG00000053617	Sh3pxd2a	SH3 and PX domains 2A [Source:MGI Symbol;Acc:MGI:1298393]	19	1.30522	0.0426054	0.856451	3.75003	4.89704
ENSMUSG00000043259	Fam13c	family with sequence similarity 13, member C [Source:MGI Symbol;Acc:MGI:1918971]	10	1.91727	0.0427049	0.856451	0.361307	0.695214
ENSMUSG00000083282	Ctsf	cathepsin F [Source:MGI Symbol;Acc:MGI:1861434]	19	1.22474	0.0427166	0.856451	18.5406	22.7092
ENSMUSG00000039639	Kcne1	potassium voltage-gated channel, Isk-related subfamily, member 1 [Source:MGI Symbol;Acc:MGI:96673]	16	2.73938	0.0427892	0.856726	0.285619	0.785497
ENSMUSG00000071342	Lsmem1	leucine-rich single-pass membrane protein 1 [Source:MGI Symbol;Acc:MGI:2685735]	12	2.3672	0.0429192	0.858148	0.452518	1.08147
ENSMUSG00000046312	Myorg	myogenesis regulating glycosidase (putative) [Source:MGI Symbol;Acc:MGI:2140300]	4	1.58019	0.0430941	0.860463	2.37247	3.74976
ENSMUSG00000054702	Ap1s3	adaptor-related protein complex AP-1, sigma 3 [Source:MGI Symbol;Acc:MGI:1891304]	1	-1.50411	0.0431608	0.86059	6.49366	4.32358
ENSMUSG00000023206	Il15ra	interleukin 15 receptor, alpha chain [Source:MGI Symbol;Acc:MGI:104644]	2	-2.30369	0.0432187	0.86059	0.567767	0.244283
ENSMUSG00000055675	Kbtbd11	kelch repeat and BTB (POZ) domain containing 11 [Source:MGI Symbol;Acc:MGI:1922151]	8	1.37775	0.0434799	0.864524	3.39964	4.68332
ENSMUSG00000019647	Sema6a	sema domain, transmembrane domain (TM), and cytoplasmic domain, (semaphorin) 6A [Source:MGI Symbol;Acc:MGI:1203727]	18	1.82267	0.0435351	0.864524	2.98871	5.44726
ENSMUSG00000025574	Tk1	thymidine kinase 1 [Source:MGI Symbol;Acc:MGI:98763]	11	2.39212	0.0436824	0.864896	0.205484	0.494735
ENSMUSG00000038967	Pdk2	pyruvate dehydrogenase kinase, isoenzyme 2 [Source:MGI Symbol;Acc:MGI:1343087]	11	1.35063	0.0438082	0.864896	33.006	44.572
ENSMUSG00000045725	Prr15	proline rich 15 [Source:MGI Symbol;Acc:MGI:1925254]	6	-3.70652	0.0438209	0.864896	1.02989	0.277289
ENSMUSG00000022280	Rnf19a	ring finger protein 19A [Source:MGI Symbol;Acc:MGI:1353623]	15	-1.25144	0.0439518	0.864896	13.748	10.982
ENSMUSG00000086006	Gm13293	predicted gene 13293 [Source:MGI Symbol;Acc:MGI:3649469]	2	-1.60049	0.0440324	0.864896	8.48229	5.30292
ENSMUSG00000035206	Sppl2b	signal peptide peptidase like 2B [Source:MGI Symbol;Acc:MGI:1920468]	10	1.44401	0.0440386	0.864896	2.85794	4.1259
ENSMUSG00000006494	Pdk1	pyruvate dehydrogenase kinase, isoenzyme 1 [Source:MGI Symbol;Acc:MGI:1926119]	2	1.26904	0.0440469	0.864896	6.92169	8.78695
ENSMUSG00000116652	B830017H08Rik	RIKEN cDNA B830017H08 gene [Source:MGI Symbol;Acc:MGI:3045365]	16	2.66652	0.0440769	0.864896	0.593164	1.59148
ENSMUSG00000021767	Kat6b	K(lysine) acetyltransferase 6B [Source:MGI Symbol;Acc:MGI:1858746]	14	1.24732	0.0440885	0.864896	9.06818	11.3114
ENSMUSG00000031568	Rwdd4a	RWD domain containing 4A [Source:MGI Symbol;Acc:MGI:2681000]	8	1.26896	0.0442768	0.866338	12.2407	15.5342
ENSMUSG00000058589	Anks1b	ankyrin repeat and sterile alpha motif domain containing 1B [Source:MGI Symbol;Acc:MGI:1924781]	10	-1.62391	0.0443078	0.866338	0.68622	0.422258
ENSMUSG00000025887	Casp12	caspase 12 [Source:MGI Symbol;Acc:MGI:1312922]	9	-1.94867	0.0444091	0.866338	1.49059	0.76622
ENSMUSG00000031258	Xkrx	X-linked Kx blood group related, X-linked [Source:MGI Symbol;Acc:MGI:3584011]	X	-2.48925	0.0444917	0.866338	0.752178	0.30049
ENSMUSG00000040296	Ddx58	DEAD/H box helicase 58 [Source:MGI Symbol;Acc:MGI:2442858]	4	1.90755	0.0446492	0.866338	1.46357	2.79391
ENSMUSG00000018459	Slc13a3	solute carrier family 13 (sodium-dependent dicarboxylate transporter), member 3 [Source:MGI Symbol;Acc:MGI:2149635]	2	2.91809	0.0446804	0.866338	0.689826	2.01536
ENSMUSG00000037656	Slc20a2	solute carrier family 20, member 2 [Source:MGI Symbol;Acc:MGI:97851]	8	1.35927	0.0446913	0.866338	12.1932	16.5696
ENSMUSG00000030662	Ipo5	importin 5 [Source:MGI Symbol;Acc:MGI:1917822]	14	-1.26624	0.0447028	0.866338	61.4744	48.5509
ENSMUSG00000020273	Papolg	poly(A) polymerase gamma [Source:MGI Symbol;Acc:MGI:2442119]	11	1.60046	0.0447422	0.866338	1.14768	1.83964
ENSMUSG00000026532	Spta1	spectrin alpha, erythrocytic 1 [Source:MGI Symbol;Acc:MGI:98385]	1	-1.25172	0.0447572	0.866338	6.28236	5.01718
ENSMUSG00000032401	Lctl	lactase-like [Source:MGI Symbol;Acc:MGI:2183549]	9	-1.31735	0.0450138	0.866827	67.7984	51.4704
ENSMUSG00000042439	Zfp532	zinc finger protein 532 [Source:MGI Symbol;Acc:MGI:3036282]	18	1.34922	0.0450536	0.866827	3.6044	4.86083
ENSMUSG00000005102	Eif2ak4	eukaryotic translation initiation factor 2 alpha kinase 4 [Source:MGI Symbol;Acc:MGI:1353427]	2	-1.32296	0.0451651	0.866827	6.6959	5.06383
ENSMUSG00000051220	Ercc6l	excision repair cross-complementing rodent repair deficiency complementation group 6 like [Source:MGI Symbol;Acc:MGI:2654144]	X	2.887	0.0451797	0.866827	0.116742	0.343477
ENSMUSG00000073421	H2-Ab1	histocompatibility 2, class II antigen A, beta 1 [Source:MGI Symbol;Acc:MGI:103070]	17	3.28498	0.045184	0.866827	1.04366	3.43543
ENSMUSG00000028456	Unc13b	unc-13 homolog B [Source:MGI Symbol;Acc:MGI:1342278]	4	-1.23831	0.0452423	0.866827	9.36449	7.56215
ENSMUSG00000042719	Naa25	N(alpha)-acetyltransferase 25, NatB auxiliary subunit [Source:MGI Symbol;Acc:MGI:2442563]	5	-1.36624	0.0453505	0.866827	4.87577	3.57035
ENSMUSG00000058503	Fam133b	family with sequence similarity 133, member B [Source:MGI Symbol;Acc:MGI:1915402]	5	-1.35216	0.0453538	0.866827	4.64566	3.43735
ENSMUSG00000023951	Vegfa	vascular endothelial growth factor A [Source:MGI Symbol;Acc:MGI:103178]	17	1.26122	0.0454007	0.866827	14.8198	18.6932
ENSMUSG00000048832	Vps37c	vacuolar protein sorting 37C [Source:MGI Symbol;Acc:MGI:2147661]	19	-1.33322	0.0454234	0.866827	12.9568	9.72193
ENSMUSG00000026914	Psmd14	proteasome (prosome, macropain) 26S subunit, non-ATPase, 14 [Source:MGI Symbol;Acc:MGI:1913284]	2	-1.34394	0.0455082	0.866827	11.3656	8.45541
ENSMUSG00000022508	Bcl6	B cell leukemia/lymphoma 6 [Source:MGI Symbol;Acc:MGI:107187]	16	1.28015	0.0455406	0.866827	6.21399	7.95389
ENSMUSG00000025158	Rfng	RFNG O-fucosylpeptide 3-beta-N-acetylglucosaminyltransferase [Source:MGI Symbol;Acc:MGI:894275]	11	1.36211	0.0455566	0.866827	7.00673	9.54219
ENSMUSG00000029687	Ezh2	enhancer of zeste 2 polycomb repressive complex 2 subunit [Source:MGI Symbol;Acc:MGI:107940]	6	1.53891	0.0458832	0.868187	1.61781	2.48958
ENSMUSG00000046733	Gprc5a	G protein-coupled receptor, family C, group 5, member A [Source:MGI Symbol;Acc:MGI:1891250]	6	-1.49645	0.0459441	0.868187	8.96477	5.9931
ENSMUSG00000028081	Rps3a1	ribosomal protein S3A1 [Source:MGI Symbol;Acc:MGI:1202063]	3	-1.27294	0.0459496	0.868187	297.939	234.049
ENSMUSG00000026301	Iqca	IQ motif containing with AAA domain [Source:MGI Symbol;Acc:MGI:1922168]	1	2.45315	0.04607	0.868187	0.183117	0.452537
ENSMUSG00000002250	Ppard	peroxisome proliferator activator receptor delta [Source:MGI Symbol;Acc:MGI:101884]	17	-1.40378	0.0461907	0.868187	3.13236	2.23056
ENSMUSG00000077714	Snord17	small nucleolar RNA, C/D box 17 [Source:MGI Symbol;Acc:MGI:3819523]	2	1.77639	0.0462089	0.868187	20.6003	36.5536
ENSMUSG00000020115	Tbk1	TANK-binding kinase 1 [Source:MGI Symbol;Acc:MGI:1929658]	10	-1.40821	0.046253	0.868187	9.19964	6.53393
ENSMUSG00000072568	Lratd2	LRAT domain containing 1 [Source:MGI Symbol;Acc:MGI:3026924]	15	-1.42094	0.0463731	0.868187	3.92155	2.75688
ENSMUSG00000001025	S100a6	S100 calcium binding protein A6 (calcyclin) [Source:MGI Symbol;Acc:MGI:1339467]	3	-1.28048	0.0463917	0.868187	174.157	136.01
ENSMUSG00000070883	Ccdc173	coiled-coil domain containing 173 [Source:MGI Symbol;Acc:MGI:1923100]	2	-1.69953	0.0464124	0.868187	3.57138	2.09988
ENSMUSG00000021951	Eef1akmt1	EEF1A alpha lysine methyltransferase 1 [Source:MGI Symbol;Acc:MGI:1915293]	14	2.15576	0.0464448	0.868187	2.16062	4.66096
ENSMUSG00000044083	Efcab8	EF-hand calcium binding domain 8 [Source:MGI Symbol;Acc:MGI:3644206]	2	-2.63859	0.0464752	0.868187	0.547883	0.207152
ENSMUSG00000048000	Gigyf2	GRB10 interacting GYF protein 2 [Source:MGI Symbol;Acc:MGI:2138584]	1	1.25413	0.0464794	0.868187	4.35786	5.46323
ENSMUSG00000030606	Hapln3	hyaluronan and proteoglycan link protein 3 [Source:MGI Symbol;Acc:MGI:1914916]	7	-3.51625	0.0465627	0.868187	0.560019	0.157119
ENSMUSG00000021466	Ptch1	patched 1 [Source:MGI Symbol;Acc:MGI:105373]	13	1.23093	0.0465819	0.868187	6.01139	7.40017
ENSMUSG00000065637	Gm26397	predicted gene, 26397 [Source:MGI Symbol;Acc:MGI:5456174]	8	2.27696	0.0466603	0.868187	9.41767	21.5214
ENSMUSG00000030921	Trim30a	tripartite motif-containing 30A [Source:MGI Symbol;Acc:MGI:98178]	7	3.01593	0.0467029	0.868187	0.192873	0.58784
ENSMUSG00000041915	Ammecr1l	AMME chromosomal region gene 1-like [Source:MGI Symbol;Acc:MGI:2442711]	18	-1.3235	0.0467712	0.868187	6.4965	4.90937
ENSMUSG00000024883	Rin1	Ras and Rab interactor 1 [Source:MGI Symbol;Acc:MGI:2385695]	19	-3.59055	0.0467767	0.868187	0.502274	0.139656
ENSMUSG00000024873	Cnih2	cornichon family AMPA receptor auxiliary protein 2 [Source:MGI Symbol;Acc:MGI:1277225]	19	-2.66184	0.0469347	0.868187	1.566	0.58063
ENSMUSG00000038024	Dennd4c	DENN/MADD domain containing 4C [Source:MGI Symbol;Acc:MGI:1914769]	4	1.27797	0.0469698	0.868187	4.6524	5.9458
ENSMUSG00000013736	Trnt1	tRNA nucleotidyl transferase, CCA-adding, 1 [Source:MGI Symbol;Acc:MGI:1917297]	6	-1.42699	0.0469897	0.868187	5.55183	3.89501
ENSMUSG00000030276	Ttll3	tubulin tyrosine ligase-like family, member 3 [Source:MGI Symbol;Acc:MGI:2141418]	6	-1.78501	0.0469999	0.868187	1.27624	0.715608
ENSMUSG00000046541	Zfp526	zinc finger protein 526 [Source:MGI Symbol;Acc:MGI:2445181]	7	-1.56453	0.0472134	0.870894	4.68312	2.99427
ENSMUSG00000026604	Ptpn14	protein tyrosine phosphatase, non-receptor type 14 [Source:MGI Symbol;Acc:MGI:102467]	1	1.29752	0.047274	0.870894	9.0498	11.7416
ENSMUSG00000030249	Abcc9	ATP-binding cassette, sub-family C (CFTR/MRP), member 9 [Source:MGI Symbol;Acc:MGI:1352630]	6	1.81067	0.047326	0.870894	0.59116	1.07204
ENSMUSG00000064128	Cenpj	centromere protein J [Source:MGI Symbol;Acc:MGI:2684927]	14	1.6299	0.0477041	0.875676	1.43444	2.33665
ENSMUSG00000006403	Adamts4	a disintegrin-like and metallopeptidase (reprolysin type) with thrombospondin type 1 motif, 4 [Source:MGI Symbol;Acc:MGI:1339949]	1	1.30861	0.0477281	0.875676	26.9476	35.2622
ENSMUSG00000096370	Gm21992	predicted gene 21992 [Source:MGI Symbol;Acc:MGI:5439461]	19	-2.6857	0.0478415	0.875676	0.32706	0.119419
ENSMUSG00000068115	Ninl	ninein-like [Source:MGI Symbol;Acc:MGI:1925427]	2	-1.43328	0.0478843	0.875676	4.19932	2.93197
ENSMUSG00000050567	Maml1	mastermind like transcriptional coactivator 1 [Source:MGI Symbol;Acc:MGI:1890504]	11	1.28884	0.0479447	0.875676	7.56801	9.75605
ENSMUSG00000038602	Slc35f1	solute carrier family 35, member F1 [Source:MGI Symbol;Acc:MGI:2139810]	10	1.3023	0.047997	0.875676	5.81403	7.57527
ENSMUSG00000052133	Sema5b	sema domain, seven thrombospondin repeats (type 1 and type 1-like), transmembrane domain (TM) and short cytoplasmic domain, (semaphorin) 5B [Source:MGI Symbol;Acc:MGI:107555]	16	-1.30915	0.0480792	0.875676	9.58739	7.32749
ENSMUSG00000032340	Neo1	neogenin [Source:MGI Symbol;Acc:MGI:1097159]	9	1.26184	0.0481378	0.875676	24.2398	30.5877
ENSMUSG00000035275	Raver2	ribonucleoprotein, PTB-binding 2 [Source:MGI Symbol;Acc:MGI:2443623]	4	1.30804	0.0481721	0.875676	5.57356	7.29245
ENSMUSG00000006676	Usp19	ubiquitin specific peptidase 19 [Source:MGI Symbol;Acc:MGI:1918722]	9	1.23981	0.0481874	0.875676	16.7014	20.705
ENSMUSG00000022507	1810013L24Rik	RIKEN cDNA 1810013L24 gene [Source:MGI Symbol;Acc:MGI:1916303]	16	-1.2623	0.0484138	0.87867	18.4955	14.657
ENSMUSG00000029338	Antxr2	anthrax toxin receptor 2 [Source:MGI Symbol;Acc:MGI:1919164]	5	1.72832	0.0484861	0.87867	1.01454	1.75088
ENSMUSG00000029174	Tbc1d1	TBC1 domain family, member 1 [Source:MGI Symbol;Acc:MGI:1889508]	5	-1.61398	0.0485343	0.87867	3.07744	1.907
ENSMUSG00000035828	Pim3	proviral integration site 3 [Source:MGI Symbol;Acc:MGI:1355297]	15	1.2807	0.0485937	0.87867	14.5097	18.5757
ENSMUSG00000038495	Otud7b	OTU domain containing 7B [Source:MGI Symbol;Acc:MGI:2654703]	3	-1.22961	0.0486566	0.878717	10.3452	8.41247
ENSMUSG00000097440	Gm6277	predicted gene 6277 [Source:MGI Symbol;Acc:MGI:3779583]	18	-2.13177	0.0487386	0.879107	1.71264	0.802501
ENSMUSG00000032068	Plet1	placenta expressed transcript 1 [Source:MGI Symbol;Acc:MGI:1923759]	9	-4.42026	0.0488797	0.880561	1.72191	0.382514
ENSMUSG00000022040	Ephx2	epoxide hydrolase 2, cytoplasmic [Source:MGI Symbol;Acc:MGI:99500]	14	1.29008	0.0489859	0.881382	16.7621	21.6311
ENSMUSG00000025225	Nfkb2	nuclear factor of kappa light polypeptide gene enhancer in B cells 2, p49/p100 [Source:MGI Symbol;Acc:MGI:1099800]	19	-1.38787	0.0493379	0.886518	5.66788	4.0859
ENSMUSG00000025578	Cbx8	chromobox 8 [Source:MGI Symbol;Acc:MGI:1353589]	11	-2.13247	0.0494329	0.886518	0.838404	0.390559
ENSMUSG00000109568	Gm45074	predicted gene 45074 [Source:MGI Symbol;Acc:MGI:5753650]	8	-2.95865	0.0495253	0.886518	1.91044	0.644787
ENSMUSG00000052336	Cx3cr1	chemokine (C-X3-C motif) receptor 1 [Source:MGI Symbol;Acc:MGI:1333815]	9	2.66881	0.0495257	0.886518	0.274803	0.73571
ENSMUSG00000070871	Ccnyl1	cyclin Y-like 1 [Source:MGI Symbol;Acc:MGI:2138614]	1	-1.39859	0.0495758	0.886518	9.59902	6.87143
ENSMUSG00000020015	Cdk17	cyclin-dependent kinase 17 [Source:MGI Symbol;Acc:MGI:97517]	10	-1.29299	0.0496812	0.886951	7.20975	5.57991
ENSMUSG00000003534	Ddr1	discoidin domain receptor family, member 1 [Source:MGI Symbol;Acc:MGI:99216]	17	1.24947	0.0497219	0.886951	55.8722	69.8146
ENSMUSG00000022098	Bmp1	bone morphogenetic protein 1 [Source:MGI Symbol;Acc:MGI:88176]	14	-1.28651	0.0498272	0.887533	18.7176	14.5505
ENSMUSG00000008305	Tle1	transducin-like enhancer of split 1 [Source:MGI Symbol;Acc:MGI:104636]	4	1.36593	0.0498765	0.887533	3.86428	5.27827
ENSMUSG00000020255	D10Wsu102e	DNA segment, Chr 10, Wayne State University 102, expressed [Source:MGI Symbol;Acc:MGI:106381]	10	-1.5683	0.0500151	0.888719	0.672722	0.429036
ENSMUSG00000028653	Trit1	tRNA isopentenyltransferase 1 [Source:MGI Symbol;Acc:MGI:1914216]	4	-1.57525	0.0501093	0.888719	7.0137	4.44998
ENSMUSG00000006134	Crkl	v-crk avian sarcoma virus CT10 oncogene homolog-like [Source:MGI Symbol;Acc:MGI:104686]	16	-1.28263	0.0501693	0.888719	8.77595	6.84254
ENSMUSG00000028373	Astn2	astrotactin 2 [Source:MGI Symbol;Acc:MGI:1889277]	4	2.63781	0.0502772	0.888719	1.30919	3.45489
ENSMUSG00000005813	Metap1	methionyl aminopeptidase 1 [Source:MGI Symbol;Acc:MGI:1922874]	3	-1.35042	0.0503435	0.888719	4.91468	3.64204
ENSMUSG00000062127	Cttnbp2nl	CTTNBP2 N-terminal like [Source:MGI Symbol;Acc:MGI:1933137]	3	-1.25144	0.0504181	0.888719	6.70879	5.36117
ENSMUSG00000086741	Gm15816	predicted gene 15816 [Source:MGI Symbol;Acc:MGI:3802114]	8	2.58204	0.0505264	0.888719	0.663099	1.72667
ENSMUSG00000073647	Gm10557	predicted gene 10557 [Source:MGI Symbol;Acc:MGI:3708638]	18	-1.42371	0.0506065	0.888719	40.2089	28.2472
ENSMUSG00000044037	Als2cl	ALS2 C-terminal like [Source:MGI Symbol;Acc:MGI:2447532]	9	-2.47661	0.050749	0.888719	0.556676	0.223389
ENSMUSG00000028551	Cdkn2c	cyclin dependent kinase inhibitor 2C [Source:MGI Symbol;Acc:MGI:105388]	4	1.47292	0.0507659	0.888719	3.92756	5.79269
ENSMUSG00000036655	Colec11	collectin sub-family member 11 [Source:MGI Symbol;Acc:MGI:1918943]	12	1.93022	0.0510493	0.888719	1.3511	2.61732
ENSMUSG00000068876	Cgn	cingulin [Source:MGI Symbol;Acc:MGI:1927237]	3	1.68703	0.0510845	0.888719	10.4815	17.6815
ENSMUSG00000043088	Il17re	interleukin 17 receptor E [Source:MGI Symbol;Acc:MGI:1889371]	6	1.88295	0.0510938	0.888719	0.722185	1.35865
ENSMUSG00000040258	Nxph4	neurexophilin 4 [Source:MGI Symbol;Acc:MGI:1336197]	10	1.24985	0.0511352	0.888719	38.0995	47.6209
ENSMUSG00000029186	Pi4k2b	phosphatidylinositol 4-kinase type 2 beta [Source:MGI Symbol;Acc:MGI:1914323]	5	-1.4402	0.0511678	0.888719	5.21584	3.62241
ENSMUSG00000067818	Myl9	myosin, light polypeptide 9, regulatory [Source:MGI Symbol;Acc:MGI:2138915]	2	1.54574	0.0512201	0.888719	8.77286	13.5563
ENSMUSG00000021592	Arsk	arylsulfatase K [Source:MGI Symbol;Acc:MGI:1924291]	13	1.63666	0.0512217	0.888719	1.19502	1.95705
ENSMUSG00000030428	Ttyh1	tweety family member 1 [Source:MGI Symbol;Acc:MGI:1889007]	7	1.56891	0.0512344	0.888719	2.5164	3.9447
ENSMUSG00000056211	R3hdm1	R3H domain containing 1 [Source:MGI Symbol;Acc:MGI:2448514]	1	-1.22315	0.0512695	0.888719	2.88129	2.35556
ENSMUSG00000023345	Poc1a	POC1 centriolar protein A [Source:MGI Symbol;Acc:MGI:1917485]	9	-2.04731	0.0512749	0.888719	1.01105	0.491895
ENSMUSG00000026047	Poglut2	protein O-glucosyltransferase 2 [Source:MGI Symbol;Acc:MGI:1919300]	1	1.87611	0.051312	0.888719	0.898328	1.68396
ENSMUSG00000038119	Cdon	cell adhesion molecule-related/down-regulated by oncogenes [Source:MGI Symbol;Acc:MGI:1926387]	9	1.55419	0.0515097	0.888719	11.0468	17.1677
ENSMUSG00000027698	Nceh1	neutral cholesterol ester hydrolase 1 [Source:MGI Symbol;Acc:MGI:2443191]	3	-1.35937	0.0515532	0.888719	4.97301	3.65635
ENSMUSG00000051950	B3glct	beta-3-glucosyltransferase [Source:MGI Symbol;Acc:MGI:2685903]	5	1.33147	0.0515829	0.888719	4.4865	5.97427
ENSMUSG00000019842	Traf3ip2	TRAF3 interacting protein 2 [Source:MGI Symbol;Acc:MGI:2143599]	10	-1.86377	0.051591	0.888719	1.55938	0.834773
ENSMUSG00000004661	Arid3b	AT rich interactive domain 3B (BRIGHT-like) [Source:MGI Symbol;Acc:MGI:1930768]	9	-1.3823	0.0516074	0.888719	3.57275	2.58608
ENSMUSG00000022792	Yars2	tyrosyl-tRNA synthetase 2 (mitochondrial) [Source:MGI Symbol;Acc:MGI:1917370]	16	-1.57154	0.0517023	0.888719	3.16081	2.00894
ENSMUSG00000052911	Lamb2	laminin, beta 2 [Source:MGI Symbol;Acc:MGI:99916]	9	1.23857	0.0517428	0.888719	29.8052	36.9132
ENSMUSG00000007872	Id3	inhibitor of DNA binding 3 [Source:MGI Symbol;Acc:MGI:96398]	4	1.41711	0.0517661	0.888719	30.0215	42.5431
ENSMUSG00000037411	Serpine1	serine (or cysteine) peptidase inhibitor, clade E, member 1 [Source:MGI Symbol;Acc:MGI:97608]	5	-1.69729	0.0517748	0.888719	5.44503	3.20927
ENSMUSG00000030107	Usp18	ubiquitin specific peptidase 18 [Source:MGI Symbol;Acc:MGI:1344364]	6	2.69215	0.051869	0.889061	1.44381	3.89292
ENSMUSG00000026778	Prkcq	protein kinase C, theta [Source:MGI Symbol;Acc:MGI:97601]	2	1.27406	0.0519168	0.889061	5.98899	7.63345
ENSMUSG00000035305	Ror1	receptor tyrosine kinase-like orphan receptor 1 [Source:MGI Symbol;Acc:MGI:1347520]	4	-1.28763	0.0520453	0.890213	22.0822	17.1462
ENSMUSG00000075592	Nynrin	NYN domain and retroviral integrase containing [Source:MGI Symbol;Acc:MGI:2652872]	14	1.31873	0.0522069	0.89089	6.42147	8.46873
ENSMUSG00000059981	Taok2	TAO kinase 2 [Source:MGI Symbol;Acc:MGI:1915919]	7	1.22936	0.0522428	0.89089	7.79493	9.58206
ENSMUSG00000117877	Gm8184	predicted gene 8184 [Source:MGI Symbol;Acc:MGI:3643112]	19	-2.52423	0.0522685	0.89089	1.20137	0.474134
ENSMUSG00000046807	Lrrc75b	leucine rich repeat containing 75B [Source:MGI Symbol;Acc:MGI:2143657]	10	1.24926	0.0523726	0.891621	11.7238	14.6445
ENSMUSG00000039195	1110008P14Rik	RIKEN cDNA 1110008P14 gene [Source:MGI Symbol;Acc:MGI:1920987]	2	1.58348	0.052515	0.89291	2.50505	3.9752
ENSMUSG00000079414	Gm11110	predicted gene 11110 [Source:MGI Symbol;Acc:MGI:3779362]	17	2.07378	0.052571	0.89291	0.71422	1.48996
ENSMUSG00000039646	Vasn	vasorin [Source:MGI Symbol;Acc:MGI:2177651]	16	1.34418	0.0527303	0.894276	13.0512	17.5404
ENSMUSG00000016496	Cd274	CD274 antigen [Source:MGI Symbol;Acc:MGI:1926446]	19	1.77291	0.0527743	0.894276	0.902714	1.60214
ENSMUSG00000036109	Mbnl3	muscleblind like splicing factor 3 [Source:MGI Symbol;Acc:MGI:2444912]	X	2.84256	0.0530867	0.897521	0.123491	0.35278
ENSMUSG00000023051	Tarbp2	TARBP2, RISC loading complex RNA binding subunit [Source:MGI Symbol;Acc:MGI:103027]	15	-1.63388	0.0531668	0.897521	1.72644	1.05634
ENSMUSG00000026004	Kansl1l	KAT8 regulatory NSL complex subunit 1-like [Source:MGI Symbol;Acc:MGI:1915941]	1	-1.36118	0.0531977	0.897521	3.90603	2.86874
ENSMUSG00000049580	Tsku	tsukushi, small leucine rich proteoglycan [Source:MGI Symbol;Acc:MGI:2443855]	7	1.47895	0.0532488	0.897521	4.726	6.98512
ENSMUSG00000022453	Naga	N-acetyl galactosaminidase, alpha [Source:MGI Symbol;Acc:MGI:1261422]	15	1.34075	0.0532831	0.897521	9.36128	12.5466
ENSMUSG00000053646	Plxnb1	plexin B1 [Source:MGI Symbol;Acc:MGI:2154238]	9	1.25074	0.0534049	0.897521	16.3688	20.4721
ENSMUSG00000049420	Tmem200a	transmembrane protein 200A [Source:MGI Symbol;Acc:MGI:1924470]	10	2.23609	0.0534057	0.897521	0.508973	1.13783
ENSMUSG00000075012	Fjx1	four jointed box 1 [Source:MGI Symbol;Acc:MGI:1341907]	2	-1.53004	0.0535171	0.897521	4.9212	3.21586
ENSMUSG00000038780	Smurf1	SMAD specific E3 ubiquitin protein ligase 1 [Source:MGI Symbol;Acc:MGI:1923038]	5	-1.35064	0.0535286	0.897521	6.0653	4.49399
ENSMUSG00000109239	Gm45176	predicted gene 45176 [Source:MGI Symbol;Acc:MGI:5753752]	7	-2.67828	0.0535824	0.897521	0.507185	0.187154
ENSMUSG00000033697	Arhgap39	Rho GTPase activating protein 39 [Source:MGI Symbol;Acc:MGI:107858]	15	1.33105	0.0537102	0.898626	2.78406	3.70711
ENSMUSG00000020473	Aebp1	AE binding protein 1 [Source:MGI Symbol;Acc:MGI:1197012]	11	-1.26993	0.0539037	0.899026	24.7166	19.4656
ENSMUSG00000024892	Pcx	pyruvate carboxylase [Source:MGI Symbol;Acc:MGI:97520]	19	1.40266	0.0539379	0.899026	4.79849	6.72781
ENSMUSG00000020402	Vdac1	voltage-dependent anion channel 1 [Source:MGI Symbol;Acc:MGI:106919]	11	1.22471	0.0540086	0.899026	34.1707	41.8449
ENSMUSG00000033880	Lgals3bp	lectin, galactoside-binding, soluble, 3 binding protein [Source:MGI Symbol;Acc:MGI:99554]	11	1.43408	0.0540484	0.899026	10.3909	14.899
ENSMUSG00000040010	Slc7a5	solute carrier family 7 (cationic amino acid transporter, y+ system), member 5 [Source:MGI Symbol;Acc:MGI:1298205]	8	1.24317	0.0541134	0.899026	18.613	23.1456
ENSMUSG00000033386	Frrs1	ferric-chelate reductase 1 [Source:MGI Symbol;Acc:MGI:108076]	3	1.90179	0.0541671	0.899026	0.518422	0.985947
ENSMUSG00000031847	1700030J22Rik	RIKEN cDNA 1700030J22 gene [Source:MGI Symbol;Acc:MGI:1916778]	8	2.1029	0.0542295	0.899026	0.622364	1.3117
ENSMUSG00000006204	Cdcp3	CUB domain containing protein 3 [Source:MGI Symbol;Acc:MGI:1918645]	7	-2.43493	0.0542486	0.899026	1.12981	0.463752
ENSMUSG00000025318	Jph3	junctophilin 3 [Source:MGI Symbol;Acc:MGI:1891497]	8	-2.91916	0.0543186	0.899026	0.441099	0.148251
ENSMUSG00000020747	Tmem94	transmembrane protein 94 [Source:MGI Symbol;Acc:MGI:1919197]	11	1.33349	0.0543517	0.899026	4.80712	6.40653
ENSMUSG00000031077	Fadd	Fas (TNFRSF6)-associated via death domain [Source:MGI Symbol;Acc:MGI:109324]	7	1.425	0.0544303	0.899305	3.42385	4.88089
ENSMUSG00000052146	Rps10	ribosomal protein S10 [Source:MGI Symbol;Acc:MGI:1914347]	17	-2.91077	0.0545181	0.899565	0.586617	0.200408
ENSMUSG00000029591	Ung	uracil DNA glycosylase [Source:MGI Symbol;Acc:MGI:109352]	5	-2.66811	0.0545696	0.899565	0.452857	0.167713
ENSMUSG00000037946	Fgd3	FYVE, RhoGEF and PH domain containing 3 [Source:MGI Symbol;Acc:MGI:1353657]	13	-3.3383	0.0547477	0.900874	1.54782	0.463158
ENSMUSG00000058594	Fbh1	F-box DNA helicase 1 [Source:MGI Symbol;Acc:MGI:1354699]	2	1.29289	0.054833	0.900874	6.43697	8.32123
ENSMUSG00000037692	Ahdc1	AT hook, DNA binding motif, containing 1 [Source:MGI Symbol;Acc:MGI:2444218]	4	1.24484	0.0548347	0.900874	13.3378	16.6033
ENSMUSG00000027599	Armc1	armadillo repeat containing 1 [Source:MGI Symbol;Acc:MGI:1921502]	3	1.29718	0.0550226	0.902942	7.03191	9.11911
ENSMUSG00000022967	Ifnar1	interferon (alpha and beta) receptor 1 [Source:MGI Symbol;Acc:MGI:107658]	16	1.28927	0.0551333	0.902956	6.44012	8.30053
ENSMUSG00000033883	Zfp267	zinc finger protein 267 [Source:MGI Symbol;Acc:MGI:1098769]	3	-1.28552	0.0552015	0.902956	5.05126	3.92942
ENSMUSG00000031226	Pbdc1	polysaccharide biosynthesis domain containing 1 [Source:MGI Symbol;Acc:MGI:1914933]	X	-1.43308	0.0552096	0.902956	3.36724	2.3497
ENSMUSG00000041773	Enc1	ectodermal-neural cortex 1 [Source:MGI Symbol;Acc:MGI:109610]	13	-2.87598	0.0553415	0.903328	0.667597	0.231941
ENSMUSG00000032103	Pus3	pseudouridine synthase 3 [Source:MGI Symbol;Acc:MGI:1914299]	9	-1.81617	0.0553857	0.903328	2.03487	1.12275
ENSMUSG00000044667	Plppr4	phospholipid phosphatase related 4 [Source:MGI Symbol;Acc:MGI:106530]	3	2.35026	0.055446	0.903328	0.207914	0.489241
ENSMUSG00000031399	Fam3a	family with sequence similarity 3, member A [Source:MGI Symbol;Acc:MGI:1913544]	X	1.38009	0.0554806	0.903328	8.36456	11.5519
ENSMUSG00000006519	Cyba	cytochrome b-245, alpha polypeptide [Source:MGI Symbol;Acc:MGI:1316658]	8	2.39148	0.0555941	0.904166	1.18162	2.83122
ENSMUSG00000037640	Zfp60	zinc finger protein 60 [Source:MGI Symbol;Acc:MGI:99207]	7	1.50388	0.0557166	0.905147	1.38933	2.08958
ENSMUSG00000021365	Nedd9	neural precursor cell expressed, developmentally down-regulated gene 9 [Source:MGI Symbol;Acc:MGI:97302]	13	1.27127	0.055807	0.905604	19.1718	24.3693
ENSMUSG00000033581	Igf2bp2	insulin-like growth factor 2 mRNA binding protein 2 [Source:MGI Symbol;Acc:MGI:1890358]	16	-1.48684	0.0560906	0.909192	2.8695	1.93271
ENSMUSG00000031538	Plat	plasminogen activator, tissue [Source:MGI Symbol;Acc:MGI:97610]	8	-1.37049	0.0561893	0.909779	8.09366	5.9078
ENSMUSG00000037885	Stk35	serine/threonine kinase 35 [Source:MGI Symbol;Acc:MGI:1914583]	2	1.239	0.0564429	0.912791	59.6228	73.8754
ENSMUSG00000032640	Chsy1	chondroitin sulfate synthase 1 [Source:MGI Symbol;Acc:MGI:2681120]	7	1.24993	0.056518	0.912791	10.1048	12.6293
ENSMUSG00000061878	Sphk1	sphingosine kinase 1 [Source:MGI Symbol;Acc:MGI:1316649]	11	-2.42403	0.0565635	0.912791	0.848506	0.346627
ENSMUSG00000090031	4732440D04Rik	RIKEN cDNA 4732440D04 gene [Source:MGI Symbol;Acc:MGI:3604103]	1	-1.90165	0.0567079	0.914109	0.872512	0.458405
ENSMUSG00000102225	Gm37983	predicted gene, 37983 [Source:MGI Symbol;Acc:MGI:5611211]	9	-3.43925	0.0570524	0.91797	0.580984	0.167929
ENSMUSG00000029267	Mtf2	metal response element binding transcription factor 2 [Source:MGI Symbol;Acc:MGI:105050]	5	-1.42311	0.0571527	0.91797	4.11941	2.89644
ENSMUSG00000034659	Tmem109	transmembrane protein 109 [Source:MGI Symbol;Acc:MGI:1915789]	19	1.26912	0.057189	0.91797	9.3012	11.8095
ENSMUSG00000026313	Hdac4	histone deacetylase 4 [Source:MGI Symbol;Acc:MGI:3036234]	1	-1.27076	0.0571997	0.91797	8.51577	6.7018
ENSMUSG00000031434	Morc4	microrchidia 4 [Source:MGI Symbol;Acc:MGI:1922996]	X	-1.67203	0.0572732	0.91798	1.09852	0.655769
ENSMUSG00000067916	Zfp991	zinc finger protein 991 [Source:MGI Symbol;Acc:MGI:3701604]	4	1.50428	0.0573776	0.91798	2.45645	3.69778
ENSMUSG00000021266	Wars	tryptophanyl-tRNA synthetase [Source:MGI Symbol;Acc:MGI:104630]	12	1.37058	0.0573895	0.91798	4.79573	6.56951
ENSMUSG00000034422	Parp14	poly (ADP-ribose) polymerase family, member 14 [Source:MGI Symbol;Acc:MGI:1919489]	16	1.84394	0.057513	0.918945	0.433025	0.799104
ENSMUSG00000034334	Fam151b	family with sequence similarity 151, member B [Source:MGI Symbol;Acc:MGI:1921192]	13	-1.96988	0.0576986	0.919849	2.47424	1.25139
ENSMUSG00000007891	Ctsd	cathepsin D [Source:MGI Symbol;Acc:MGI:88562]	7	1.27901	0.0577838	0.919849	42.2128	53.9738
ENSMUSG00000042988	Notum	notum palmitoleoyl-protein carboxylesterase [Source:MGI Symbol;Acc:MGI:1924833]	11	2.50738	0.0577994	0.919849	1.49281	3.74855
ENSMUSG00000115161	Gm20555	predicted gene, 20555 [Source:MGI Symbol;Acc:MGI:5295662]	15	-2.31014	0.0578224	0.919849	0.953784	0.413248
ENSMUSG00000060594	Layn	layilin [Source:MGI Symbol;Acc:MGI:2685357]	9	-1.9016	0.0580034	0.920255	4.11672	2.16348
ENSMUSG00000034520	Gjc1	gap junction protein, gamma 1 [Source:MGI Symbol;Acc:MGI:95718]	11	1.96244	0.0580408	0.920255	0.549992	1.08043
ENSMUSG00000042200	Cdrt4	CMT1A duplicated region transcript 4 [Source:MGI Symbol;Acc:MGI:1913588]	11	1.61941	0.0580658	0.920255	6.92065	11.2217
ENSMUSG00000039620	Trmt9b	tRNA methyltransferase 9B [Source:MGI Symbol;Acc:MGI:2442328]	8	2.19545	0.0581008	0.920255	0.266838	0.58607
ENSMUSG00000039021	Ttc16	tetratricopeptide repeat domain 16 [Source:MGI Symbol;Acc:MGI:2443048]	2	-2.39043	0.0581695	0.920342	0.257024	0.106742
ENSMUSG00000058571	Gpc6	glypican 6 [Source:MGI Symbol;Acc:MGI:1346322]	14	1.73598	0.0582376	0.92042	3.10615	5.39177
ENSMUSG00000078877	Gm14295	predicted gene 14295 [Source:MGI Symbol;Acc:MGI:3709624]	2	-1.69211	0.0583728	0.921555	2.43703	1.44237
ENSMUSG00000106904	Gm43029	predicted gene 43029 [Source:MGI Symbol;Acc:MGI:5663166]	6	-2.43187	0.0584639	0.921921	1.75965	0.721455
ENSMUSG00000035629	Rubcn	RUN domain and cysteine-rich domain containing, Beclin 1-interacting protein [Source:MGI Symbol;Acc:MGI:1915160]	16	1.32428	0.0585391	0.921921	3.47299	4.60074
ENSMUSG00000021838	Samd4	sterile alpha motif domain containing 4 [Source:MGI Symbol;Acc:MGI:1921730]	14	-1.49492	0.0585859	0.921921	11.8842	7.95091
ENSMUSG00000073643	Wdfy1	WD repeat and FYVE domain containing 1 [Source:MGI Symbol;Acc:MGI:1916618]	1	-1.50146	0.058664	0.922153	2.3324	1.55587
ENSMUSG00000031119	Gpc4	glypican 4 [Source:MGI Symbol;Acc:MGI:104902]	X	1.22612	0.0587967	0.922786	36.26	44.4527
ENSMUSG00000086583	Gm15500	predicted pseudogene 15500 [Source:MGI Symbol;Acc:MGI:3782947]	7	-1.46226	0.0588311	0.922786	47.1724	32.244
ENSMUSG00000021792	Prxl2a	peroxiredoxin like 2A [Source:MGI Symbol;Acc:MGI:1917814]	14	1.3628	0.0590309	0.924923	20.698	28.1984
ENSMUSG00000019850	Tnfaip3	tumor necrosis factor, alpha-induced protein 3 [Source:MGI Symbol;Acc:MGI:1196377]	10	2.38473	0.059183	0.92631	9.84298	23.4743
ENSMUSG00000033307	Mif	macrophage migration inhibitory factor (glycosylation-inhibiting factor) [Source:MGI Symbol;Acc:MGI:96982]	10	1.22635	0.0593012	0.927163	149.284	183.084
ENSMUSG00000117438	Rpsa-ps7	ribosomal protein SA, pseudogene 7 [Source:MGI Symbol;Acc:MGI:3643805]	17	-2.60504	0.0594633	0.92811	2.29181	0.869893
ENSMUSG00000027236	Eif3j1	eukaryotic translation initiation factor 3, subunit J1 [Source:MGI Symbol;Acc:MGI:1925905]	2	-1.30889	0.0594893	0.92811	7.40025	5.65511
ENSMUSG00000038384	Setd1b	SET domain containing 1B [Source:MGI Symbol;Acc:MGI:2652820]	5	1.22622	0.059588	0.928654	6.48613	7.95188
ENSMUSG00000036427	Gpi1	glucose-6-phosphate isomerase 1 [Source:MGI Symbol;Acc:MGI:95797]	7	1.25036	0.0600129	0.93281	30.8627	38.5883
ENSMUSG00000035329	Fbxo33	F-box protein 33 [Source:MGI Symbol;Acc:MGI:1917861]	12	1.37587	0.0600802	0.93281	3.8463	5.29731
ENSMUSG00000104078	Gm37023	predicted gene, 37023 [Source:MGI Symbol;Acc:MGI:5610251]	9	-2.1776	0.0601096	0.93281	1.89709	0.869739
ENSMUSG00000029171	Pgm2	phosphoglucomutase 2 [Source:MGI Symbol;Acc:MGI:97564]	5	-1.39166	0.060111	0.93281	7.69852	5.53634
ENSMUSG00000034684	Sema3f	sema domain, immunoglobulin domain (Ig), short basic domain, secreted, (semaphorin) 3F [Source:MGI Symbol;Acc:MGI:1096347]	9	1.52892	0.060416	0.933188	5.68119	8.68386
ENSMUSG00000030609	Aen	apoptosis enhancing nuclease [Source:MGI Symbol;Acc:MGI:1915298]	7	-1.50027	0.0604645	0.933188	3.19904	2.13509
ENSMUSG00000082229	Nap1l2	nucleosome assembly protein 1-like 2 [Source:MGI Symbol;Acc:MGI:106654]	X	1.72219	0.0605291	0.933188	1.59648	2.75009
ENSMUSG00000074364	Ehd2	EH-domain containing 2 [Source:MGI Symbol;Acc:MGI:2154274]	7	1.23839	0.0606321	0.933188	19.6537	24.3414
ENSMUSG00000001517	Foxm1	forkhead box M1 [Source:MGI Symbol;Acc:MGI:1347487]	6	1.48062	0.0606815	0.933188	1.51304	2.24265
ENSMUSG00000042751	Nmnat2	nicotinamide nucleotide adenylyltransferase 2 [Source:MGI Symbol;Acc:MGI:2444155]	1	1.92367	0.0607645	0.933188	1.8069	3.47462
ENSMUSG00000041836	Ptpre	protein tyrosine phosphatase, receptor type, E [Source:MGI Symbol;Acc:MGI:97813]	7	-1.44945	0.0607789	0.933188	4.21935	2.91256
ENSMUSG00000020681	Ace	angiotensin I converting enzyme (peptidyl-dipeptidase A) 1 [Source:MGI Symbol;Acc:MGI:87874]	11	1.37886	0.0607943	0.933188	12.372	17.0616
ENSMUSG00000025193	Cutc	cutC copper transporter [Source:MGI Symbol;Acc:MGI:1913638]	19	1.73862	0.0607997	0.933188	3.3492	5.82728
ENSMUSG00000022112	Gpc5	glypican 5 [Source:MGI Symbol;Acc:MGI:1194894]	14	2.00263	0.0608994	0.933188	0.532609	1.067
ENSMUSG00000004561	Mettl17	methyltransferase like 17 [Source:MGI Symbol;Acc:MGI:1098577]	14	-1.65647	0.0609022	0.933188	2.20407	1.33252
ENSMUSG00000029650	Slc46a3	solute carrier family 46, member 3 [Source:MGI Symbol;Acc:MGI:1918956]	5	2.11338	0.0609972	0.933188	0.843832	1.78546
ENSMUSG00000021339	Mrs2	MRS2 magnesium transporter [Source:MGI Symbol;Acc:MGI:2685748]	13	-1.28204	0.0610295	0.933188	5.84278	4.55823
ENSMUSG00000096696	Zfp960	zinc finger protein 960 [Source:MGI Symbol;Acc:MGI:3052731]	17	-2.44656	0.0610329	0.933188	0.969632	0.396201
ENSMUSG00000079470	Utp14b	UTP14B small subunit processome component [Source:MGI Symbol;Acc:MGI:2445092]	1	1.56265	0.0611708	0.933496	9.39598	14.682
ENSMUSG00000020553	Pctp	phosphatidylcholine transfer protein [Source:MGI Symbol;Acc:MGI:107375]	11	2.28588	0.0611813	0.933496	0.428088	0.984
ENSMUSG00000112756	Gm48014	predicted gene, 48014 [Source:MGI Symbol;Acc:MGI:6097321]	12	-1.83583	0.0612691	0.933856	4.88047	2.6614
ENSMUSG00000115882	Gm5481	predicted gene 5481 [Source:MGI Symbol;Acc:MGI:3648103]	16	-2.71025	0.0613419	0.933988	4.16834	1.53684
ENSMUSG00000092072	Gm4540	predicted gene 4540 [Source:MGI Symbol;Acc:MGI:3782724]	3	-2.33033	0.0614412	0.934522	4.74291	2.0196
ENSMUSG00000031698	Mylk3	myosin light chain kinase 3 [Source:MGI Symbol;Acc:MGI:2443063]	8	1.64673	0.061554	0.935261	1.25942	2.07422
ENSMUSG00000030284	Creld1	cysteine-rich with EGF-like domains 1 [Source:MGI Symbol;Acc:MGI:2152539]	6	1.31884	0.0616479	0.935423	4.93021	6.49873
ENSMUSG00000034993	Vat1	vesicle amine transport 1 [Source:MGI Symbol;Acc:MGI:1349450]	11	-1.31257	0.0617102	0.935423	24.5937	18.7484
ENSMUSG00000003528	Slc25a1	solute carrier family 25 (mitochondrial carrier, citrate transporter), member 1 [Source:MGI Symbol;Acc:MGI:1345283]	16	1.36439	0.0617711	0.935423	10.2373	13.9708
ENSMUSG00000093908	Gm5784	predicted gene 5784 [Source:MGI Symbol;Acc:MGI:3647969]	12	-2.35643	0.0618925	0.935423	0.760665	0.320144
ENSMUSG00000027712	Anxa5	annexin A5 [Source:MGI Symbol;Acc:MGI:106008]	3	-1.28078	0.0619097	0.935423	42.3394	33.0577
ENSMUSG00000036875	Dna2	DNA replication helicase/nuclease 2 [Source:MGI Symbol;Acc:MGI:2443732]	10	-2.05739	0.0620824	0.935423	0.7679	0.372395
ENSMUSG00000039990	Edrf1	erythroid differentiation regulatory factor 1 [Source:MGI Symbol;Acc:MGI:1919831]	7	-1.40461	0.0621341	0.935423	4.32908	3.0844
ENSMUSG00000039201	Tbc1d25	TBC1 domain family, member 25 [Source:MGI Symbol;Acc:MGI:2444862]	X	-1.74891	0.0621524	0.935423	1.80058	1.02875
ENSMUSG00000033420	Antxr1	anthrax toxin receptor 1 [Source:MGI Symbol;Acc:MGI:1916788]	6	1.2343	0.0622292	0.935423	35.1738	43.416
ENSMUSG00000034729	Mrps10	mitochondrial ribosomal protein S10 [Source:MGI Symbol;Acc:MGI:1928139]	17	-1.37276	0.0623065	0.935423	2.65314	1.93333
ENSMUSG00000036095	Dgkb	diacylglycerol kinase, beta [Source:MGI Symbol;Acc:MGI:2442474]	12	-1.34497	0.0623198	0.935423	2.37494	1.76613
ENSMUSG00000040270	Bach2	BTB and CNC homology, basic leucine zipper transcription factor 2 [Source:MGI Symbol;Acc:MGI:894679]	4	-1.24418	0.0623358	0.935423	6.42022	5.1627
ENSMUSG00000040265	Dnm3	dynamin 3 [Source:MGI Symbol;Acc:MGI:1341299]	1	-1.40458	0.0625321	0.936498	2.00002	1.42345
ENSMUSG00000078607	1810010H24Rik	RIKEN cDNA 1810010H24 gene [Source:MGI Symbol;Acc:MGI:1916316]	11	1.77766	0.0626501	0.936498	2.31888	4.12614
ENSMUSG00000032497	Lrrfip2	leucine rich repeat (in FLII) interacting protein 2 [Source:MGI Symbol;Acc:MGI:1918518]	9	-1.27757	0.0626553	0.936498	11.1336	8.71827
ENSMUSG00000021733	Slc4a7	solute carrier family 4, sodium bicarbonate cotransporter, member 7 [Source:MGI Symbol;Acc:MGI:2443878]	14	-1.54519	0.0626648	0.936498	4.16795	2.69771
ENSMUSG00000053716	Dusp7	dual specificity phosphatase 7 [Source:MGI Symbol;Acc:MGI:2387100]	9	-1.28388	0.0631359	0.942513	9.98143	7.7772
ENSMUSG00000039496	Cdnf	cerebral dopamine neurotrophic factor [Source:MGI Symbol;Acc:MGI:3606576]	2	-1.69275	0.0631968	0.942513	1.92523	1.13488
ENSMUSG00000024750	Zfand5	zinc finger, AN1-type domain 5 [Source:MGI Symbol;Acc:MGI:1278334]	19	-1.22696	0.0632765	0.942736	12.579	10.2546
ENSMUSG00000026270	Capn10	calpain 10 [Source:MGI Symbol;Acc:MGI:1344392]	1	1.53544	0.063452	0.943829	2.17317	3.34116
ENSMUSG00000052688	Rab7b	RAB7B, member RAS oncogene family [Source:MGI Symbol;Acc:MGI:2442295]	1	-1.62732	0.0635154	0.943829	2.04285	1.25639
ENSMUSG00000000792	Slc5a5	solute carrier family 5 (sodium iodide symporter), member 5 [Source:MGI Symbol;Acc:MGI:2149330]	8	2.38729	0.0637475	0.943829	1.75096	4.18164
ENSMUSG00000024772	Ehd1	EH-domain containing 1 [Source:MGI Symbol;Acc:MGI:1341878]	19	-1.2233	0.0637538	0.943829	21.2268	17.3578
ENSMUSG00000052419	2610001J05Rik	RIKEN cDNA 2610001J05 gene [Source:MGI Symbol;Acc:MGI:1913770]	6	-1.54833	0.0637697	0.943829	3.18454	2.05754
ENSMUSG00000010080	Epn3	epsin 3 [Source:MGI Symbol;Acc:MGI:1919139]	11	1.41342	0.063789	0.943829	4.62324	6.53175
ENSMUSG00000061589	Dot1l	DOT1-like, histone H3 methyltransferase (S. cerevisiae) [Source:MGI Symbol;Acc:MGI:2143886]	10	-1.34405	0.0640122	0.943829	6.75578	5.0286
ENSMUSG00000087739	Gm24644	predicted gene, 24644 [Source:MGI Symbol;Acc:MGI:5454421]	2	-2.74287	0.0640214	0.943829	12.295	4.45428
ENSMUSG00000036863	Syde2	synapse defective 1, Rho GTPase, homolog 2 (C. elegans) [Source:MGI Symbol;Acc:MGI:3036264]	3	1.38925	0.0640818	0.943829	4.40565	6.12494
ENSMUSG00000035944	Ttc38	tetratricopeptide repeat domain 38 [Source:MGI Symbol;Acc:MGI:2146198]	15	1.7551	0.0641187	0.943829	0.729975	1.28156
ENSMUSG00000029464	Gpn3	GPN-loop GTPase 3 [Source:MGI Symbol;Acc:MGI:1289326]	5	1.53385	0.0641262	0.943829	2.71522	4.16638
ENSMUSG00000104344	Gm38077	predicted gene, 38077 [Source:MGI Symbol;Acc:MGI:5611305]	9	-1.8973	0.064128	0.943829	2.25615	1.18875
ENSMUSG00000051379	Flrt3	fibronectin leucine rich transmembrane protein 3 [Source:MGI Symbol;Acc:MGI:1918686]	2	-1.42036	0.0642793	0.9451	5.08737	3.57535
ENSMUSG00000003949	Hlf	hepatic leukemia factor [Source:MGI Symbol;Acc:MGI:96108]	11	1.22321	0.0645626	0.948308	21.711	26.5578
ENSMUSG00000039656	Rxrb	retinoid X receptor beta [Source:MGI Symbol;Acc:MGI:98215]	17	1.39341	0.0646629	0.948823	4.44074	6.18175
ENSMUSG00000041775	Mapk1ip1	mitogen-activated protein kinase 1 interacting protein 1 [Source:MGI Symbol;Acc:MGI:1916796]	7	-1.42992	0.0647889	0.949715	9.33482	6.52788
ENSMUSG00000037553	Zdhhc18	zinc finger, DHHC domain containing 18 [Source:MGI Symbol;Acc:MGI:3527792]	4	-1.38364	0.0649615	0.950387	6.28542	4.54565
ENSMUSG00000047787	Flrt1	fibronectin leucine rich transmembrane protein 1 [Source:MGI Symbol;Acc:MGI:3026647]	19	1.7791	0.064972	0.950387	7.52315	13.3838
ENSMUSG00000011171	Vipr2	vasoactive intestinal peptide receptor 2 [Source:MGI Symbol;Acc:MGI:107166]	12	1.82285	0.0650412	0.950387	0.537221	0.98066
ENSMUSG00000015942	Gtf2ird2	GTF2I repeat domain containing 2 [Source:MGI Symbol;Acc:MGI:2149780]	5	1.3945	0.0650959	0.950387	2.44483	3.41206
ENSMUSG00000034449	Dhrs11	dehydrogenase/reductase (SDR family) member 11 [Source:MGI Symbol;Acc:MGI:2652816]	11	1.83634	0.0652693	0.951379	1.61276	2.97111
ENSMUSG00000021493	Pdlim7	PDZ and LIM domain 7 [Source:MGI Symbol;Acc:MGI:1914649]	13	-1.23812	0.0654123	0.951379	23.3193	18.8387
ENSMUSG00000026958	Dpp7	dipeptidylpeptidase 7 [Source:MGI Symbol;Acc:MGI:1933213]	2	1.60061	0.0654239	0.951379	1.42494	2.28019
ENSMUSG00000039410	Prdm16	PR domain containing 16 [Source:MGI Symbol;Acc:MGI:1917923]	4	1.50039	0.0654253	0.951379	1.8627	2.79511
ENSMUSG00000074227	Spint2	serine protease inhibitor, Kunitz type 2 [Source:MGI Symbol;Acc:MGI:1338031]	7	1.26206	0.0655382	0.95207	12.544	15.8255
ENSMUSG00000027782	Kpna4	karyopherin (importin) alpha 4 [Source:MGI Symbol;Acc:MGI:1100848]	3	-1.22666	0.0657532	0.954241	15.5938	12.7152
ENSMUSG00000020439	Smtn	smoothelin [Source:MGI Symbol;Acc:MGI:1354727]	11	-1.69372	0.0658904	0.954347	3.70369	2.18778
ENSMUSG00000028696	Ipp	IAP promoted placental gene [Source:MGI Symbol;Acc:MGI:96581]	4	1.46646	0.0658917	0.954347	4.809	7.05269
ENSMUSG00000013076	Amotl1	angiomotin-like 1 [Source:MGI Symbol;Acc:MGI:1922973]	9	1.20999	0.0662641	0.956212	12.3604	14.9554
ENSMUSG00000027809	Etfdh	electron transferring flavoprotein, dehydrogenase [Source:MGI Symbol;Acc:MGI:106100]	3	1.46031	0.0662786	0.956212	1.83176	2.6727
ENSMUSG00000090083	Rnf8	ring finger protein 8 [Source:MGI Symbol;Acc:MGI:1929069]	17	-1.67485	0.0664486	0.956212	0.825678	0.493227
ENSMUSG00000071281	Zfp65	zinc finger protein 65 [Source:MGI Symbol;Acc:MGI:107769]	13	1.65796	0.0664506	0.956212	1.05332	1.75134
ENSMUSG00000026355	Mcm6	minichromosome maintenance complex component 6 [Source:MGI Symbol;Acc:MGI:1298227]	1	1.38326	0.0664602	0.956212	3.53466	4.89474
ENSMUSG00000022199	Slc22a17	solute carrier family 22 (organic cation transporter), member 17 [Source:MGI Symbol;Acc:MGI:1926225]	14	1.26784	0.0665036	0.956212	17.2026	21.8034
ENSMUSG00000044452	Zfp507	zinc finger protein 507 [Source:MGI Symbol;Acc:MGI:1916378]	7	-1.24049	0.0665218	0.956212	6.22152	5.01396
ENSMUSG00000106959	Gm42548	predicted gene 42548 [Source:MGI Symbol;Acc:MGI:5662685]	6	-2.57687	0.0666363	0.956212	0.525475	0.201304
ENSMUSG00000034429	Zfp707	zinc finger protein 707 [Source:MGI Symbol;Acc:MGI:1916270]	15	1.74376	0.066649	0.956212	0.967439	1.68827
ENSMUSG00000073627	C130036L24Rik	RIKEN cDNA C130036L24 gene [Source:MGI Symbol;Acc:MGI:2441877]	1	-2.22662	0.0666773	0.956212	0.301019	0.134034
ENSMUSG00000025436	Atp23	ATP23 metallopeptidase and ATP synthase assembly factor homolog [Source:MGI Symbol;Acc:MGI:1916984]	10	2.02964	0.0667918	0.956506	0.377673	0.769594
ENSMUSG00000067199	Frat1	frequently rearranged in advanced T cell lymphomas [Source:MGI Symbol;Acc:MGI:109450]	19	1.67173	0.0668293	0.956506	1.60505	2.68466
ENSMUSG00000038418	Egr1	early growth response 1 [Source:MGI Symbol;Acc:MGI:95295]	18	2.56958	0.0669194	0.956855	27.6752	71.1173
ENSMUSG00000105272	Gm43071	predicted gene 43071 [Source:MGI Symbol;Acc:MGI:5663208]	3	-2.34931	0.0671901	0.959783	0.870696	0.368628
ENSMUSG00000066150	Slc31a1	solute carrier family 31, member 1 [Source:MGI Symbol;Acc:MGI:1333843]	4	1.23773	0.0673664	0.960799	11.0398	13.6597
ENSMUSG00000027577	Chrna4	cholinergic receptor, nicotinic, alpha polypeptide 4 [Source:MGI Symbol;Acc:MGI:87888]	2	1.7264	0.0673932	0.960799	0.792481	1.37052
ENSMUSG00000045658	Pid1	phosphotyrosine interaction domain containing 1 [Source:MGI Symbol;Acc:MGI:2138391]	1	2.52179	0.0676698	0.961397	0.0931775	0.235867
ENSMUSG00000066129	Kndc1	kinase non-catalytic C-lobe domain (KIND) containing 1 [Source:MGI Symbol;Acc:MGI:1923734]	7	-2.04638	0.0677196	0.961397	0.413395	0.202057
ENSMUSG00000103427	Gm37534	predicted gene, 37534 [Source:MGI Symbol;Acc:MGI:5610762]	1	-2.57459	0.0677261	0.961397	0.48584	0.187889
ENSMUSG00000044499	Hs3st5	heparan sulfate (glucosamine) 3-O-sulfotransferase 5 [Source:MGI Symbol;Acc:MGI:2441996]	10	-1.55978	0.06785	0.961397	2.49797	1.60381
ENSMUSG00000030643	Rab30	RAB30, member RAS oncogene family [Source:MGI Symbol;Acc:MGI:1923235]	7	-1.55382	0.0680092	0.961397	1.09591	0.703806
ENSMUSG00000025283	Sat1	spermidine/spermine N1-acetyl transferase 1 [Source:MGI Symbol;Acc:MGI:98233]	X	-1.32634	0.0681634	0.961397	9.2121	6.94024
ENSMUSG00000104737	Gm42937	predicted gene 42937 [Source:MGI Symbol;Acc:MGI:5663074]	3	-2.41978	0.0681639	0.961397	2.09487	0.856611
ENSMUSG00000040751	Lat2	linker for activation of T cells family, member 2 [Source:MGI Symbol;Acc:MGI:1926479]	5	-2.19004	0.0681757	0.961397	1.50502	0.687467
ENSMUSG00000068566	Myadm	myeloid-associated differentiation marker [Source:MGI Symbol;Acc:MGI:1355332]	7	1.63999	0.0682344	0.961397	1.14116	1.8708
ENSMUSG00000031669	Gins3	GINS complex subunit 3 (Psf3 homolog) [Source:MGI Symbol;Acc:MGI:1926083]	8	-2.46004	0.0682402	0.961397	1.00822	0.405522
ENSMUSG00000035722	Abca7	ATP-binding cassette, sub-family A (ABC1), member 7 [Source:MGI Symbol;Acc:MGI:1351646]	10	-1.32332	0.0682504	0.961397	3.9653	2.99703
ENSMUSG00000105845	Gm42808	predicted gene 42808 [Source:MGI Symbol;Acc:MGI:5662945]	5	-1.39613	0.0683552	0.961397	82.022	58.7622
ENSMUSG00000022095	Fam160b2	family with sequence similarity 160, member B2 [Source:MGI Symbol;Acc:MGI:3036290]	14	-1.35075	0.0684418	0.961397	5.44606	4.03345
ENSMUSG00000106049	Gm43019	predicted gene 43019 [Source:MGI Symbol;Acc:MGI:5663156]	5	-2.92605	0.0684705	0.961397	0.775309	0.263189
ENSMUSG00000032648	Pygm	muscle glycogen phosphorylase [Source:MGI Symbol;Acc:MGI:97830]	19	1.27212	0.0686401	0.961397	14.1312	17.9715
ENSMUSG00000000085	Scmh1	sex comb on midleg homolog 1 [Source:MGI Symbol;Acc:MGI:1352762]	4	-1.28593	0.0686761	0.961397	5.63792	4.38635
ENSMUSG00000029175	Slc35f6	solute carrier family 35, member F6 [Source:MGI Symbol;Acc:MGI:1922169]	5	-1.3543	0.0687231	0.961397	2.48477	1.83429
ENSMUSG00000020638	Cmpk2	cytidine monophosphate (UMP-CMP) kinase 2, mitochondrial [Source:MGI Symbol;Acc:MGI:99830]	12	2.16306	0.0687833	0.961397	0.257137	0.559828
ENSMUSG00000037103	Dcaf15	DDB1 and CUL4 associated factor 15 [Source:MGI Symbol;Acc:MGI:2684420]	8	-1.43119	0.068873	0.961397	6.47976	4.52342
ENSMUSG00000010066	Cacna2d2	calcium channel, voltage-dependent, alpha 2/delta subunit 2 [Source:MGI Symbol;Acc:MGI:1929813]	9	1.58335	0.0688764	0.961397	1.86419	2.94971
ENSMUSG00000019876	Pkib	protein kinase inhibitor beta, cAMP dependent, testis specific [Source:MGI Symbol;Acc:MGI:101937]	10	-2.39648	0.0689204	0.961397	0.170963	0.0706681
ENSMUSG00000001802	Lrp3	low density lipoprotein receptor-related protein 3 [Source:MGI Symbol;Acc:MGI:3584516]	7	-1.35283	0.0690305	0.961397	5.12825	3.79268
ENSMUSG00000103364	Gm38157	predicted gene, 38157 [Source:MGI Symbol;Acc:MGI:5611385]	1	-2.4147	0.0690404	0.961397	1.91147	0.79089
ENSMUSG00000031833	Mast3	microtubule associated serine/threonine kinase 3 [Source:MGI Symbol;Acc:MGI:2683541]	8	1.32452	0.069106	0.961397	3.31427	4.38803
ENSMUSG00000095407	Tmem200c	transmembrane protein 200C [Source:MGI Symbol;Acc:MGI:3646281]	17	1.39854	0.0691585	0.961397	3.63932	5.09256
ENSMUSG00000044006	Cilp2	cartilage intermediate layer protein 2 [Source:MGI Symbol;Acc:MGI:1915959]	8	-2.16394	0.0691831	0.961397	0.76188	0.348293
ENSMUSG00000041957	Pkp2	plakophilin 2 [Source:MGI Symbol;Acc:MGI:1914701]	16	-1.2415	0.0693059	0.961397	9.44671	7.60554
ENSMUSG00000094832	Gm21846	predicted gene, 21846 [Source:MGI Symbol;Acc:MGI:5434010]	5	-2.39355	0.0693094	0.961397	0.483276	0.199835
ENSMUSG00000026048	Ercc5	excision repair cross-complementing rodent repair deficiency, complementation group 5 [Source:MGI Symbol;Acc:MGI:103582]	1	-1.32072	0.0693691	0.961397	5.54575	4.19904
ENSMUSG00000021814	Anxa7	annexin A7 [Source:MGI Symbol;Acc:MGI:88031]	14	-1.23271	0.0694375	0.961397	9.05954	7.34783
ENSMUSG00000042182	Bend6	BEN domain containing 6 [Source:MGI Symbol;Acc:MGI:2444572]	1	1.84407	0.0694916	0.961397	1.87153	3.45615
ENSMUSG00000097073	9430037G07Rik	RIKEN cDNA 9430037G07 gene [Source:MGI Symbol;Acc:MGI:2444544]	9	-2.36273	0.0695487	0.961397	0.525693	0.220087
ENSMUSG00000038059	Smim3	small integral membrane protein 3 [Source:MGI Symbol;Acc:MGI:1917088]	18	-1.28141	0.0697013	0.961695	5.18863	4.04933
ENSMUSG00000031816	Mthfsd	methenyltetrahydrofolate synthetase domain containing [Source:MGI Symbol;Acc:MGI:2679252]	8	-1.37414	0.0697024	0.961695	1.98622	1.44414
ENSMUSG00000029298	Gbp9	guanylate-binding protein 9 [Source:MGI Symbol;Acc:MGI:3605620]	5	2.43976	0.0699144	0.962739	0.245226	0.60152
ENSMUSG00000047434	Xxylt1	xyloside xylosyltransferase 1 [Source:MGI Symbol;Acc:MGI:2146443]	16	1.30092	0.0699184	0.962739	5.98322	7.78037
ENSMUSG00000034593	Myo5a	myosin VA [Source:MGI Symbol;Acc:MGI:105976]	9	-1.26503	0.0700315	0.962739	5.12664	4.05082
ENSMUSG00000037771	Slc32a1	solute carrier family 32 (GABA vesicular transporter), member 1 [Source:MGI Symbol;Acc:MGI:1194488]	2	2.50839	0.0701299	0.962739	0.382781	0.96211
ENSMUSG00000104164	Gm38248	predicted gene, 38248 [Source:MGI Symbol;Acc:MGI:5611476]	1	-2.31968	0.0701344	0.962739	0.434501	0.187129
ENSMUSG00000024691	Fam111a	family with sequence similarity 111, member A [Source:MGI Symbol;Acc:MGI:1915508]	19	2.71208	0.0702077	0.962739	0.0983098	0.272373
ENSMUSG00000037410	Tbc1d2b	TBC1 domain family, member 2B [Source:MGI Symbol;Acc:MGI:1914266]	9	1.69877	0.0702556	0.962739	0.65897	1.12134
ENSMUSG00000030271	Ogg1	8-oxoguanine DNA-glycosylase 1 [Source:MGI Symbol;Acc:MGI:1097693]	6	2.08723	0.0703072	0.962739	0.644229	1.34922
ENSMUSG00000025170	Rab40b	Rab40B, member RAS oncogene family [Source:MGI Symbol;Acc:MGI:2183451]	11	2.90727	0.0704631	0.962974	0.301226	0.886385
ENSMUSG00000028622	Mrpl37	mitochondrial ribosomal protein L37 [Source:MGI Symbol;Acc:MGI:1926268]	4	1.31381	0.0704679	0.962974	4.85875	6.38422
ENSMUSG00000071637	Cebpd	CCAAT/enhancer binding protein (C/EBP), delta [Source:MGI Symbol;Acc:MGI:103573]	16	-1.32464	0.0705229	0.962974	8.86089	6.68521
ENSMUSG00000026803	Ttf1	transcription termination factor, RNA polymerase I [Source:MGI Symbol;Acc:MGI:105044]	2	-1.47704	0.07066	0.963943	2.34612	1.58657
ENSMUSG00000053580	Tanc2	tetratricopeptide repeat, ankyrin repeat and coiled-coil containing 2 [Source:MGI Symbol;Acc:MGI:2444121]	11	-1.21529	0.0707586	0.964385	11.0513	9.09375
ENSMUSG00000019960	Dusp6	dual specificity phosphatase 6 [Source:MGI Symbol;Acc:MGI:1914853]	10	1.49643	0.0709154	0.965617	4.79066	7.1652
ENSMUSG00000021314	Amph	amphiphysin [Source:MGI Symbol;Acc:MGI:103574]	13	-1.22226	0.0711163	0.967448	28.4442	23.2713
ENSMUSG00000021130	Galnt16	polypeptide N-acetylgalactosaminyltransferase 16 [Source:MGI Symbol;Acc:MGI:1917754]	12	2.35404	0.0711996	0.967658	0.0860205	0.203506
ENSMUSG00000003382	Etv3	ets variant 3 [Source:MGI Symbol;Acc:MGI:1350926]	3	-1.23849	0.0713293	0.967658	6.46849	5.22583
ENSMUSG00000013415	Igf2bp1	insulin-like growth factor 2 mRNA binding protein 1 [Source:MGI Symbol;Acc:MGI:1890357]	11	1.69575	0.0713604	0.967658	0.417181	0.708053
ENSMUSG00000031618	Nr3c2	nuclear receptor subfamily 3, group C, member 2 [Source:MGI Symbol;Acc:MGI:99459]	8	1.43166	0.0713977	0.967658	3.98274	5.70029
ENSMUSG00000021271	Zfp839	zinc finger protein 839 [Source:MGI Symbol;Acc:MGI:1920055]	12	1.35321	0.0715643	0.969014	4.11769	5.57255
ENSMUSG00000035891	Cerk	ceramide kinase [Source:MGI Symbol;Acc:MGI:2386052]	15	-1.24901	0.0717644	0.97063	10.5462	8.44394
ENSMUSG00000040661	Rad54l2	RAD54 like 2 (S. cerevisiae) [Source:MGI Symbol;Acc:MGI:1933196]	9	-1.24402	0.0718706	0.97063	5.63557	4.53132
ENSMUSG00000037992	Rara	retinoic acid receptor, alpha [Source:MGI Symbol;Acc:MGI:97856]	11	1.22294	0.0718837	0.97063	15.4952	18.955
ENSMUSG00000024659	Anxa1	annexin A1 [Source:MGI Symbol;Acc:MGI:96819]	19	1.24152	0.0719518	0.970649	384.17	476.959
ENSMUSG00000006342	Susd2	sushi domain containing 2 [Source:MGI Symbol;Acc:MGI:1918983]	10	1.24039	0.0720597	0.971205	38.7889	48.1257
ENSMUSG00000020455	Trim11	tripartite motif-containing 11 [Source:MGI Symbol;Acc:MGI:2137355]	11	-1.60992	0.0723154	0.973749	5.94698	3.69545
ENSMUSG00000071337	Tia1	cytotoxic granule-associated RNA binding protein 1 [Source:MGI Symbol;Acc:MGI:107914]	6	-1.29909	0.0724331	0.974212	3.67058	2.82626
ENSMUSG00000023959	Clic5	chloride intracellular channel 5 [Source:MGI Symbol;Acc:MGI:1917912]	17	2.12833	0.0724836	0.974212	0.365882	0.780329
ENSMUSG00000039367	Sec24c	Sec24 related gene family, member C (S. cerevisiae) [Source:MGI Symbol;Acc:MGI:1919746]	14	1.21347	0.0727472	0.976044	9.34996	11.3456
ENSMUSG00000115888	Gm31369	predicted gene, 31369 [Source:MGI Symbol;Acc:MGI:5590528]	15	1.96754	0.072754	0.976044	2.17219	4.28898
ENSMUSG00000036292	Gramd1c	GRAM domain containing 1C [Source:MGI Symbol;Acc:MGI:2443024]	16	-1.82534	0.0730065	0.977146	1.14272	0.625962
ENSMUSG00000032066	Bco2	beta-carotene oxygenase 2 [Source:MGI Symbol;Acc:MGI:2177469]	9	-2.01332	0.0730211	0.977146	1.44255	0.713434
ENSMUSG00000031596	Slc7a2	solute carrier family 7 (cationic amino acid transporter, y+ system), member 2 [Source:MGI Symbol;Acc:MGI:99828]	8	1.27287	0.0730633	0.977146	92.1614	117.31
ENSMUSG00000035818	Plekhs1	pleckstrin homology domain containing, family S member 1 [Source:MGI Symbol;Acc:MGI:2443041]	19	-2.50394	0.0731047	0.977146	0.742529	0.292475
ENSMUSG00000020889	Nr1d1	nuclear receptor subfamily 1, group D, member 1 [Source:MGI Symbol;Acc:MGI:2444210]	11	-1.25293	0.0733348	0.978051	100.371	80.1081
ENSMUSG00000032977	Fam207a	family with sequence similarity 207, member A [Source:MGI Symbol;Acc:MGI:1916334]	10	-1.3576	0.0733455	0.978051	8.37352	6.1738
ENSMUSG00000108190	Gm44731	predicted gene 44731 [Source:MGI Symbol;Acc:MGI:5753307]	6	-1.93686	0.073374	0.978051	9.07997	4.69001
ENSMUSG00000035227	Spcs2	signal peptidase complex subunit 2 homolog (S. cerevisiae) [Source:MGI Symbol;Acc:MGI:1913874]	7	1.29682	0.0734875	0.978668	7.42539	9.62977
ENSMUSG00000072966	Gprasp2	G protein-coupled receptor associated sorting protein 2 [Source:MGI Symbol;Acc:MGI:2442071]	X	1.4137	0.0738391	0.979887	2.30085	3.25156
ENSMUSG00000022855	Senp2	SUMO/sentrin specific peptidase 2 [Source:MGI Symbol;Acc:MGI:1923076]	16	-1.26719	0.0739006	0.979887	14.2789	11.2719
ENSMUSG00000102742	Pcdhga11	protocadherin gamma subfamily A, 11 [Source:MGI Symbol;Acc:MGI:1935228]	18	-1.42507	0.073964	0.979887	2.86159	2.00848
ENSMUSG00000027460	Angpt4	angiopoietin 4 [Source:MGI Symbol;Acc:MGI:1336887]	2	-2.61713	0.0740025	0.979887	0.669348	0.25569
ENSMUSG00000116875	Morf4l1-ps1	mortality factor 4 like 1, pseudogene 1 [Source:MGI Symbol;Acc:MGI:3612158]	16	2.66933	0.0740032	0.979887	0.751229	2.01671
ENSMUSG00000027998	Plrg1	pleiotropic regulator 1 [Source:MGI Symbol;Acc:MGI:1858197]	3	1.41192	0.0741064	0.979887	3.44322	4.86448
ENSMUSG00000025314	Ptprj	protein tyrosine phosphatase, receptor type, J [Source:MGI Symbol;Acc:MGI:104574]	2	1.24933	0.0741096	0.979887	8.33517	10.4142
ENSMUSG00000084968	Gm12743	predicted gene 12743 [Source:MGI Symbol;Acc:MGI:3651449]	4	-2.42517	0.0741176	0.979887	0.430928	0.177396
ENSMUSG00000034765	Dusp5	dual specificity phosphatase 5 [Source:MGI Symbol;Acc:MGI:2685183]	19	-2.00599	0.074278	0.981117	21.7749	10.8575
ENSMUSG00000034981	Parm1	prostate androgen-regulated mucin-like protein 1 [Source:MGI Symbol;Acc:MGI:2443349]	5	1.22541	0.0744752	0.981321	26.7459	32.7723
ENSMUSG00000028341	Nr4a3	nuclear receptor subfamily 4, group A, member 3 [Source:MGI Symbol;Acc:MGI:1352457]	4	1.52707	0.0744976	0.981321	1.55012	2.37064
ENSMUSG00000041625	Ggact	gamma-glutamylamine cyclotransferase [Source:MGI Symbol;Acc:MGI:2385008]	14	1.42888	0.0745049	0.981321	2.91606	4.16463
ENSMUSG00000031167	Rbm3	RNA binding motif (RNP1, RRM) protein 3 [Source:MGI Symbol;Acc:MGI:1099460]	X	1.22875	0.0745631	0.981321	10.3105	12.668
ENSMUSG00000021532	Fastkd3	FAST kinase domains 3 [Source:MGI Symbol;Acc:MGI:1916827]	13	-1.83362	0.0747329	0.981494	0.798047	0.435286
ENSMUSG00000029638	Glcci1	glucocorticoid induced transcript 1 [Source:MGI Symbol;Acc:MGI:2179717]	6	-2.27981	0.074741	0.981494	0.256345	0.111301
ENSMUSG00000028347	Tmeff1	transmembrane protein with EGF-like and two follistatin-like domains 1 [Source:MGI Symbol;Acc:MGI:1926810]	4	2.21537	0.0748719	0.981494	0.959409	2.12959
ENSMUSG00000104060	Gm37954	predicted gene, 37954 [Source:MGI Symbol;Acc:MGI:5611182]	1	-2.67898	0.0749125	0.981494	0.681193	0.252166
ENSMUSG00000101337	Dnah7c	dynein, axonemal, heavy chain 7C [Source:MGI Symbol;Acc:MGI:3639762]	1	-1.99541	0.0749527	0.981494	0.261826	0.130959
ENSMUSG00000038520	Tbc1d17	TBC1 domain family, member 17 [Source:MGI Symbol;Acc:MGI:2449973]	7	-1.31942	0.0749809	0.981494	3.57331	2.70804
ENSMUSG00000024614	Tmx3	thioredoxin-related transmembrane protein 3 [Source:MGI Symbol;Acc:MGI:2442418]	18	1.21622	0.0750794	0.981901	6.17601	7.51174
ENSMUSG00000080928	Hmgb1-ps6	high mobility group box 1, pseudogene 6 [Source:MGI Symbol;Acc:MGI:3776507]	16	-2.52755	0.0751977	0.98191	2.45163	0.969984
ENSMUSG00000019731	Slc35e1	solute carrier family 35, member E1 [Source:MGI Symbol;Acc:MGI:2142403]	8	1.27444	0.075215	0.98191	8.19034	10.4371
ENSMUSG00000021009	Ptpn21	protein tyrosine phosphatase, non-receptor type 21 [Source:MGI Symbol;Acc:MGI:1344406]	12	-1.2882	0.0753696	0.983047	31.5782	24.5166
ENSMUSG00000102277	A130050O07Rik	RIKEN cDNA A130050O07 gene [Source:MGI Symbol;Acc:MGI:2443458]	1	-2.30689	0.0755671	0.983994	0.519484	0.222766
ENSMUSG00000068299	Nat8f4	N-acetyltransferase 8 (GCN5-related) family member 4 [Source:MGI Symbol;Acc:MGI:1922791]	6	1.78558	0.0756726	0.983994	2.35331	4.20179
ENSMUSG00000034220	Gpc1	glypican 1 [Source:MGI Symbol;Acc:MGI:1194891]	1	-1.25821	0.0756908	0.983994	13.979	11.1143
ENSMUSG00000048915	Efna5	ephrin A5 [Source:MGI Symbol;Acc:MGI:107444]	17	1.2112	0.0757344	0.983994	17.0275	20.6299
ENSMUSG00000055633	Zfp580	zinc finger protein 580 [Source:MGI Symbol;Acc:MGI:1916242]	7	-1.38028	0.0757803	0.983994	19.3938	14.0466
ENSMUSG00000030309	Caprin2	caprin family member 2 [Source:MGI Symbol;Acc:MGI:2448541]	6	-1.23322	0.0759826	0.984548	4.5949	3.72679
ENSMUSG00000037085	Trmt12	tRNA methyltransferase 12 [Source:MGI Symbol;Acc:MGI:1915510]	15	-1.95826	0.0760674	0.984548	0.970376	0.493547
ENSMUSG00000037243	Zfp692	zinc finger protein 692 [Source:MGI Symbol;Acc:MGI:2144276]	11	-1.6956	0.0761021	0.984548	3.98468	2.35265
ENSMUSG00000086288	Gm15265	predicted gene 15265 [Source:MGI Symbol;Acc:MGI:3705193]	3	-2.43037	0.0761524	0.984548	6.38253	2.62835
ENSMUSG00000024940	Ltbp3	latent transforming growth factor beta binding protein 3 [Source:MGI Symbol;Acc:MGI:1101355]	19	1.22736	0.0762262	0.984548	31.7417	38.9561
ENSMUSG00000035671	Zswim4	zinc finger SWIM-type containing 4 [Source:MGI Symbol;Acc:MGI:2443726]	8	-1.30652	0.0762969	0.984548	7.93009	6.07112
ENSMUSG00000081855	Rpl17-ps5	ribosomal protein L17, pseudogene 5 [Source:MGI Symbol;Acc:MGI:3704246]	5	-1.75787	0.0763055	0.984548	8.76084	4.97412
ENSMUSG00000001707	Eef1e1	eukaryotic translation elongation factor 1 epsilon 1 [Source:MGI Symbol;Acc:MGI:1913393]	13	-1.74204	0.0764171	0.984548	1.40851	0.806236
ENSMUSG00000007827	Ankrd26	ankyrin repeat domain 26 [Source:MGI Symbol;Acc:MGI:1917887]	6	1.45709	0.0764317	0.984548	1.84344	2.68367
ENSMUSG00000078247	Airn	antisense Igf2r RNA [Source:MGI Symbol;Acc:MGI:1353471]	17	-1.50935	0.0766107	0.985982	6.12006	4.0556
ENSMUSG00000117901		novel transcript, antisense to Macrod1	19	1.97313	0.0767525	0.98619	3.72578	7.34376
ENSMUSG00000068250	Amn1	antagonist of mitotic exit network 1 [Source:MGI Symbol;Acc:MGI:2442933]	6	-1.475	0.0767624	0.98619	0.951732	0.645338
ENSMUSG00000032370	Lactb	lactamase, beta [Source:MGI Symbol;Acc:MGI:1933395]	9	1.77701	0.0768728	0.986737	2.31365	4.12568
ENSMUSG00000034152	Exoc3	exocyst complex component 3 [Source:MGI Symbol;Acc:MGI:2443972]	13	1.24053	0.077135	0.987268	8.07598	10.0165
ENSMUSG00000014496	Ankrd28	ankyrin repeat domain 28 [Source:MGI Symbol;Acc:MGI:2145661]	14	-1.2006	0.0771496	0.987268	8.81088	7.33843
ENSMUSG00000049225	Pdp1	pyruvate dehyrogenase phosphatase catalytic subunit 1 [Source:MGI Symbol;Acc:MGI:2685870]	4	-1.56963	0.077187	0.987268	2.84759	1.81137
ENSMUSG00000022358	Fbxo32	F-box protein 32 [Source:MGI Symbol;Acc:MGI:1914981]	15	1.42207	0.0772483	0.987268	2.31541	3.29084
ENSMUSG00000038425	Poli	polymerase (DNA directed), iota [Source:MGI Symbol;Acc:MGI:1347081]	18	1.4179	0.0772532	0.987268	2.7837	3.94682
ENSMUSG00000066357	Wdr6	WD repeat domain 6 [Source:MGI Symbol;Acc:MGI:1930140]	9	1.2076	0.0774288	0.988643	22.5281	27.2031
ENSMUSG00000039936	Pik3cd	phosphatidylinositol-4,5-bisphosphate 3-kinase catalytic subunit delta [Source:MGI Symbol;Acc:MGI:1098211]	4	-1.42147	0.0776434	0.990055	2.67571	1.8825
ENSMUSG00000114797	Gm49336	predicted gene, 49336 [Source:MGI Symbol;Acc:MGI:6121524]	14	-1.45603	0.0776754	0.990055	1.75593	1.20702
ENSMUSG00000016624	Phf21b	PHD finger protein 21B [Source:MGI Symbol;Acc:MGI:2443812]	15	1.84452	0.0777591	0.990081	0.728502	1.34771
ENSMUSG00000037933	Bicd2	BICD cargo adaptor 2 [Source:MGI Symbol;Acc:MGI:1924145]	13	1.24497	0.0778134	0.990081	7.86145	9.78765
ENSMUSG00000021294	Kif26a	kinesin family member 26A [Source:MGI Symbol;Acc:MGI:2447072]	12	1.45975	0.0778905	0.990195	1.83297	2.67599
ENSMUSG00000031378	Abcd1	ATP-binding cassette, sub-family D (ALD), member 1 [Source:MGI Symbol;Acc:MGI:1349215]	X	1.4437	0.0780369	0.991191	1.98769	2.87082
ENSMUSG00000117648	Gm32282	predicted gene, 32282 [Source:MGI Symbol;Acc:MGI:5591441]	17	2.27393	0.0782304	0.992417	1.97093	4.49598
ENSMUSG00000049502	Dtx3l	deltex 3-like, E3 ubiquitin ligase [Source:MGI Symbol;Acc:MGI:2656973]	16	1.52813	0.0783479	0.992417	1.38887	2.12336
ENSMUSG00000036860	Mrpl55	mitochondrial ribosomal protein L55 [Source:MGI Symbol;Acc:MGI:1914462]	11	-1.52658	0.0783502	0.992417	10.6351	6.97722
ENSMUSG00000025175	Fn3k	fructosamine 3 kinase [Source:MGI Symbol;Acc:MGI:1926834]	11	-1.43515	0.0784061	0.992417	3.00433	2.09472
ENSMUSG00000040025	Ythdf2	YTH N6-methyladenosine RNA binding protein 2 [Source:MGI Symbol;Acc:MGI:2444233]	4	-1.22326	0.0786982	0.994719	12.5335	10.2475
ENSMUSG00000026162	Nhej1	non-homologous end joining factor 1 [Source:MGI Symbol;Acc:MGI:1922820]	1	2.28692	0.0787786	0.994719	0.720197	1.64839
ENSMUSG00000043923	Ccdc84	coiled-coil domain containing 84 [Source:MGI Symbol;Acc:MGI:2685960]	9	-1.67942	0.0788253	0.994719	1.71598	1.02114
ENSMUSG00000071604	Fam189a2	family with sequence similarity 189, member A2 [Source:MGI Symbol;Acc:MGI:2685813]	19	-1.67946	0.0788866	0.994719	2.25771	1.34209
ENSMUSG00000081104	Gm15989	predicted gene 15989 [Source:MGI Symbol;Acc:MGI:3801755]	5	-2.51644	0.0790561	0.994719	2.66202	1.04867
ENSMUSG00000050891	Tatdn1	TatD DNase domain containing 1 [Source:MGI Symbol;Acc:MGI:1916944]	15	-1.51419	0.0790695	0.994719	1.4782	0.976561
ENSMUSG00000002289	Angptl4	angiopoietin-like 4 [Source:MGI Symbol;Acc:MGI:1888999]	17	-1.60564	0.0790729	0.994719	3.59824	2.23464
ENSMUSG00000027285	Haus2	HAUS augmin-like complex, subunit 2 [Source:MGI Symbol;Acc:MGI:1913546]	2	-1.41414	0.07928	0.994719	4.48349	3.17157
ENSMUSG00000030522	Mtmr10	myotubularin related protein 10 [Source:MGI Symbol;Acc:MGI:2142292]	7	-1.23815	0.0794634	0.994719	9.95034	8.03987
ENSMUSG00000024617	Camk2a	calcium/calmodulin-dependent protein kinase II alpha [Source:MGI Symbol;Acc:MGI:88256]	18	1.42995	0.0794992	0.994719	2.14306	3.06613
ENSMUSG00000096995	2810029C07Rik	RIKEN cDNA 2810029C07 gene [Source:MGI Symbol;Acc:MGI:1919920]	12	1.90113	0.0795204	0.994719	0.900034	1.71479
ENSMUSG00000037185	Krt80	keratin 80 [Source:MGI Symbol;Acc:MGI:1921377]	15	-2.35161	0.0795564	0.994719	0.351915	0.14751
ENSMUSG00000027573	Gid8	GID complex subunit 8 [Source:MGI Symbol;Acc:MGI:1923675]	2	1.25312	0.0796533	0.994719	12.2763	15.3841
ENSMUSG00000052748	Swt1	SWT1 RNA endoribonuclease homolog (S. cerevisiae) [Source:MGI Symbol;Acc:MGI:1914125]	1	-1.40152	0.0797207	0.994719	1.5733	1.12267
ENSMUSG00000103696	Gm37531	predicted gene, 37531 [Source:MGI Symbol;Acc:MGI:5610759]	1	-2.14045	0.0797399	0.994719	0.480117	0.222395
ENSMUSG00000032265	Tent5a	terminal nucleotidyltransferase 5A [Source:MGI Symbol;Acc:MGI:2670964]	9	-1.45292	0.0797966	0.994719	2.37061	1.63314
ENSMUSG00000068479	Mfap1a	microfibrillar-associated protein 1A [Source:MGI Symbol;Acc:MGI:1914782]	2	1.39463	0.0798104	0.994719	2.44534	3.4114
ENSMUSG00000029761	Cald1	caldesmon 1 [Source:MGI Symbol;Acc:MGI:88250]	6	-1.2353	0.0798181	0.994719	48.368	39.1548
ENSMUSG00000095253	Zfp799	zinc finger protein 799 [Source:MGI Symbol;Acc:MGI:2443934]	17	-1.39383	0.080047	0.995976	4.17641	2.99742
ENSMUSG00000002043	Trappc6a	trafficking protein particle complex 6A [Source:MGI Symbol;Acc:MGI:1914341]	7	1.6089	0.0800558	0.995976	2.64948	4.27014
ENSMUSG00000086385	Gm12701	predicted gene 12701 [Source:MGI Symbol;Acc:MGI:3650875]	4	-2.47677	0.080209	0.996223	8.3152	3.35555
ENSMUSG00000025810	Nrp1	neuropilin 1 [Source:MGI Symbol;Acc:MGI:106206]	8	2.0055	0.0802659	0.996223	0.604715	1.21273
ENSMUSG00000036606	Plxnb2	plexin B2 [Source:MGI Symbol;Acc:MGI:2154239]	15	1.21514	0.0802809	0.996223	76.0639	92.4277
ENSMUSG00000036904	Fzd8	frizzled class receptor 8 [Source:MGI Symbol;Acc:MGI:108460]	18	1.52129	0.0805577	0.998418	1.89293	2.8804
ENSMUSG00000029545	Acads	acyl-Coenzyme A dehydrogenase, short chain [Source:MGI Symbol;Acc:MGI:87868]	5	1.46763	0.0806562	0.998418	4.32964	6.36446
ENSMUSG00000047330	Kcne4	potassium voltage-gated channel, Isk-related subfamily, gene 4 [Source:MGI Symbol;Acc:MGI:1891125]	1	-1.5913	0.0807878	0.998418	5.63295	3.53831
ENSMUSG00000053801	Grwd1	glutamate-rich WD repeat containing 1 [Source:MGI Symbol;Acc:MGI:2141989]	7	1.49831	0.0808151	0.998418	3.98285	5.97661
ENSMUSG00000027715	Ccna2	cyclin A2 [Source:MGI Symbol;Acc:MGI:108069]	3	1.58766	0.0808352	0.998418	1.23778	1.96701
ENSMUSG00000105470	Gm42589	predicted gene 42589 [Source:MGI Symbol;Acc:MGI:5662726]	5	-2.15922	0.0808694	0.998418	1.93381	0.893871
ENSMUSG00000028487	Bnc2	basonuclin 2 [Source:MGI Symbol;Acc:MGI:2443805]	4	-1.2862	0.0810718	1	3.6721	2.85485
ENSMUSG00000034255	Arhgap27	Rho GTPase activating protein 27 [Source:MGI Symbol;Acc:MGI:1916903]	11	1.41066	0.0811738	1	2.2173	3.12544
ENSMUSG00000041958	Pigs	phosphatidylinositol glycan anchor biosynthesis, class S [Source:MGI Symbol;Acc:MGI:2687325]	11	1.22288	0.0812457	1	19.9603	24.4113
ENSMUSG00000025138	Sirt7	sirtuin 7 [Source:MGI Symbol;Acc:MGI:2385849]	11	-1.54945	0.0814339	1	1.88058	1.2155
ENSMUSG00000030093	Wnt7a	wingless-type MMTV integration site family, member 7A [Source:MGI Symbol;Acc:MGI:98961]	6	-1.22051	0.0816871	1	25.2658	20.7062
ENSMUSG00000000056	Narf	nuclear prelamin A recognition factor [Source:MGI Symbol;Acc:MGI:1914858]	11	1.26016	0.081774	1	7.13874	8.99716
ENSMUSG00000027822	Slc33a1	solute carrier family 33 (acetyl-CoA transporter), member 1 [Source:MGI Symbol;Acc:MGI:1332247]	3	1.27823	0.081893	1	6.14112	7.85211
ENSMUSG00000029179	Zcchc4	zinc finger, CCHC domain containing 4 [Source:MGI Symbol;Acc:MGI:1926046]	5	-1.49332	0.0820658	1	1.07808	0.721634
ENSMUSG00000087370	Tmem170b	transmembrane protein 170B [Source:MGI Symbol;Acc:MGI:3647046]	13	-1.2328	0.0822687	1	7.62178	6.18588
ENSMUSG00000028399	Ptprd	protein tyrosine phosphatase, receptor type, D [Source:MGI Symbol;Acc:MGI:97812]	4	1.19799	0.0822955	1	7.76123	9.29769
ENSMUSG00000091017	Fam71a	family with sequence similarity 71, member A [Source:MGI Symbol;Acc:MGI:3588202]	1	2.3711	0.0823034	1	0.365341	0.870281
ENSMUSG00000038866	Zcchc2	zinc finger, CCHC domain containing 2 [Source:MGI Symbol;Acc:MGI:2444114]	1	-1.23984	0.0824283	1	13.2605	10.6989
ENSMUSG00000111017	Gm48314	predicted gene, 48314 [Source:MGI Symbol;Acc:MGI:6097766]	9	-2.55184	0.0824653	1	0.873261	0.339872
ENSMUSG00000032026	Rexo2	RNA exonuclease 2 [Source:MGI Symbol;Acc:MGI:1888981]	9	-1.2526	0.0826063	1	12.4216	9.91709
ENSMUSG00000096199	Ptrhd1	peptidyl-tRNA hydrolase domain containing 1 [Source:MGI Symbol;Acc:MGI:1916959]	12	1.83	0.0827297	1	0.657459	1.20565
ENSMUSG00000054199	Gon4l	gon-4-like (C.elegans) [Source:MGI Symbol;Acc:MGI:1917579]	3	1.25003	0.0828788	1	4.04823	5.06079
ENSMUSG00000039220	Ppp1r10	protein phosphatase 1, regulatory subunit 10 [Source:MGI Symbol;Acc:MGI:1289273]	17	1.34492	0.0831514	1	4.61578	6.20728
ENSMUSG00000041774	Ydjc	YdjC homolog (bacterial) [Source:MGI Symbol;Acc:MGI:1916351]	16	-2.43691	0.0831582	1	0.36742	0.149801
ENSMUSG00002076169			6	2.33729	0.0834451	1	5.79636	13.6979
ENSMUSG00000021400	Wrnip1	Werner helicase interacting protein 1 [Source:MGI Symbol;Acc:MGI:1926153]	13	-1.23488	0.0835111	1	9.82332	7.95414
ENSMUSG00000021665	Hexb	hexosaminidase B [Source:MGI Symbol;Acc:MGI:96074]	13	1.27856	0.0837217	1	15.7428	20.1131
ENSMUSG00000102786	Gm38252	predicted gene, 38252 [Source:MGI Symbol;Acc:MGI:5611480]	3	-3.22476	0.0837564	1	0.733928	0.222193
ENSMUSG00000109498	Gm45222	predicted gene 45222 [Source:MGI Symbol;Acc:MGI:5753798]	7	-1.98478	0.0838161	1	0.803866	0.403719
ENSMUSG00000086794	Gm11642	predicted gene 11642 [Source:MGI Symbol;Acc:MGI:3651889]	11	-2.29011	0.0838314	1	3.73405	1.61699
ENSMUSG00000074754	Smim26	small integral membrane protein 26 [Source:MGI Symbol;Acc:MGI:2685407]	2	2.04283	0.0838608	1	2.25715	4.64491
ENSMUSG00000032006	Pdgfd	platelet-derived growth factor, D polypeptide [Source:MGI Symbol;Acc:MGI:1919035]	9	1.71984	0.083912	1	1.81794	3.12477
ENSMUSG00000042363	Lgalsl	lectin, galactoside binding-like [Source:MGI Symbol;Acc:MGI:1916114]	11	1.29603	0.0839405	1	4.96277	6.43184
ENSMUSG00000062210	Tnfaip8	tumor necrosis factor, alpha-induced protein 8 [Source:MGI Symbol;Acc:MGI:2147191]	18	1.33668	0.0839634	1	2.16474	2.89272
ENSMUSG00000101135	Gm17981	predicted gene, 17981 [Source:MGI Symbol;Acc:MGI:5010166]	7	-2.59198	0.0840018	1	1.96572	0.752135
ENSMUSG00000028389	Zfp37	zinc finger protein 37 [Source:MGI Symbol;Acc:MGI:99181]	4	-1.33027	0.0841149	1	5.51846	4.15007
ENSMUSG00000046380	Jrk	jerky [Source:MGI Symbol;Acc:MGI:106214]	15	-1.77114	0.0841781	1	1.25134	0.705745
ENSMUSG00000074513	Arfip1	ADP-ribosylation factor interacting protein 1 [Source:MGI Symbol;Acc:MGI:1277120]	3	1.81958	0.0844358	1	0.886815	1.61458
ENSMUSG00000025381	Cnpy2	canopy FGF signaling regulator 2 [Source:MGI Symbol;Acc:MGI:1928477]	10	1.26501	0.0846298	1	15.0273	19.0032
ENSMUSG00000074030	Exoc8	exocyst complex component 8 [Source:MGI Symbol;Acc:MGI:2142527]	8	1.34935	0.0846654	1	4.14461	5.59807
ENSMUSG00000037876	Jmjd1c	jumonji domain containing 1C [Source:MGI Symbol;Acc:MGI:1918614]	10	-1.22616	0.0847789	1	13.9597	11.3856
ENSMUSG00000042010	Acacb	acetyl-Coenzyme A carboxylase beta [Source:MGI Symbol;Acc:MGI:2140940]	5	1.66304	0.0848592	1	0.57527	0.955854
ENSMUSG00000025068	Gsto1	glutathione S-transferase omega 1 [Source:MGI Symbol;Acc:MGI:1342273]	19	-1.7544	0.084867	1	20.5914	11.7289
ENSMUSG00000026942	Traf2	TNF receptor-associated factor 2 [Source:MGI Symbol;Acc:MGI:101835]	2	-1.39366	0.0848956	1	3.42586	2.46031
ENSMUSG00000051652	Lrrc3	leucine rich repeat containing 3 [Source:MGI Symbol;Acc:MGI:2447899]	10	1.73491	0.0850077	1	0.795678	1.3809
ENSMUSG00000017715	Pgs1	phosphatidylglycerophosphate synthase 1 [Source:MGI Symbol;Acc:MGI:1921701]	11	-1.38166	0.0850509	1	6.62087	4.79542
ENSMUSG00000010609	Psen2	presenilin 2 [Source:MGI Symbol;Acc:MGI:109284]	1	1.3256	0.0851126	1	3.91383	5.19329
ENSMUSG00000021711	Trappc13	trafficking protein particle complex 13 [Source:MGI Symbol;Acc:MGI:1914225]	13	1.34092	0.0855236	1	3.64909	4.89109
ENSMUSG00000116626	Gm49705	predicted gene, 49705 [Source:MGI Symbol;Acc:MGI:6215167]	16	-1.95937	0.0856345	1	0.859258	0.438899
ENSMUSG00000103291	Gm38235	predicted gene, 38235 [Source:MGI Symbol;Acc:MGI:5611463]	1	-2.17794	0.0856913	1	0.809964	0.370823
ENSMUSG00000103076	Gm37902	predicted gene, 37902 [Source:MGI Symbol;Acc:MGI:5611130]	1	-2.28679	0.085757	1	1.00766	0.435314
ENSMUSG00000028163	Nfkb1	nuclear factor of kappa light polypeptide gene enhancer in B cells 1, p105 [Source:MGI Symbol;Acc:MGI:97312]	3	-1.2999	0.0857626	1	3.50374	2.69585
ENSMUSG00000042747	Krtcap2	keratinocyte associated protein 2 [Source:MGI Symbol;Acc:MGI:1913309]	3	1.61534	0.0858017	1	4.05532	6.54735
ENSMUSG00000021094	Dhrs7	dehydrogenase/reductase (SDR family) member 7 [Source:MGI Symbol;Acc:MGI:1913625]	12	1.35805	0.0859093	1	3.65013	4.95408
ENSMUSG00000037638	Zbtb42	zinc finger and BTB domain containing 42 [Source:MGI Symbol;Acc:MGI:3644133]	12	-1.53635	0.0859958	1	2.36532	1.53983
ENSMUSG00000020740	Gga3	golgi associated, gamma adaptin ear containing, ARF binding protein 3 [Source:MGI Symbol;Acc:MGI:2384159]	11	-1.41241	0.0861304	1	3.17049	2.24603
ENSMUSG00000024160	Spsb3	splA/ryanodine receptor domain and SOCS box containing 3 [Source:MGI Symbol;Acc:MGI:1891471]	17	1.41845	0.0862788	1	3.49417	4.96065
ENSMUSG00000027386	Fbln7	fibulin 7 [Source:MGI Symbol;Acc:MGI:1917620]	2	1.40132	0.0863229	1	5.1585	7.2244
ENSMUSG00000028312	Smc2	structural maintenance of chromosomes 2 [Source:MGI Symbol;Acc:MGI:106067]	4	1.43901	0.086326	1	1.58469	2.28368
ENSMUSG00000104181	Gm8850	predicted gene 8850 [Source:MGI Symbol;Acc:MGI:3647325]	1	-2.61113	0.0863728	1	2.1922	0.831028
ENSMUSG00000023795	Pisd-ps2	phosphatidylserine decarboxylase, pseudogene 2 [Source:MGI Symbol;Acc:MGI:3612472]	17	1.94272	0.0864283	1	0.858681	1.6735
ENSMUSG00000044707	Ccnjl	cyclin J-like [Source:MGI Symbol;Acc:MGI:2685723]	11	1.21297	0.0864301	1	23.8959	28.9819
ENSMUSG00000042251	Pm20d1	peptidase M20 domain containing 1 [Source:MGI Symbol;Acc:MGI:2442939]	1	1.60592	0.0864385	1	0.605457	0.972504
ENSMUSG00000022325	Pop1	processing of precursor 1, ribonuclease P/MRP family, (S. cerevisiae) [Source:MGI Symbol;Acc:MGI:1914974]	15	-1.70608	0.0865032	1	1.71857	1.00589
ENSMUSG00000041817	Fam169a	family with sequence similarity 169, member A [Source:MGI Symbol;Acc:MGI:2444268]	13	1.20657	0.0865265	1	32.0883	38.7154
ENSMUSG00000027792	Bche	butyrylcholinesterase [Source:MGI Symbol;Acc:MGI:894278]	3	1.2899	0.0865315	1	4.65476	6.00431
ENSMUSG00000028029	Aimp1	aminoacyl tRNA synthetase complex-interacting multifunctional protein 1 [Source:MGI Symbol;Acc:MGI:102774]	3	-1.24231	0.086593	1	8.91979	7.17881
ENSMUSG00000021185	Dglucy	D-glutamate cyclase [Source:MGI Symbol;Acc:MGI:2444813]	12	1.5269	0.0866331	1	1.10149	1.68356
ENSMUSG00000041930	Fam222a	family with sequence similarity 222, member A [Source:MGI Symbol;Acc:MGI:3605543]	5	1.27267	0.0867488	1	15.1419	19.2829
ENSMUSG00000107749	Gm44321	predicted gene, 44321 [Source:MGI Symbol;Acc:MGI:5690713]	6	-3.17564	0.0869589	1	0.580629	0.180045
ENSMUSG00000025270	Alas2	aminolevulinic acid synthase 2, erythroid [Source:MGI Symbol;Acc:MGI:87990]	X	3.40619	0.0869607	1	0.365383	1.25882
ENSMUSG00000108912	E230020D15Rik	RIKEN cDNA E230020D15 gene [Source:MGI Symbol;Acc:MGI:2442650]	8	-2.24801	0.087018	1	1.60749	0.714708
ENSMUSG00000028070	Naxe	NAD(P)HX epimerase [Source:MGI Symbol;Acc:MGI:2180167]	3	1.27549	0.0871089	1	27.8392	35.5167
ENSMUSG00000032180	Tmed1	transmembrane p24 trafficking protein 1 [Source:MGI Symbol;Acc:MGI:106201]	9	1.49144	0.0871397	1	6.26756	9.36076
ENSMUSG00000000296	Tpd52l1	tumor protein D52-like 1 [Source:MGI Symbol;Acc:MGI:1298386]	10	-1.79396	0.0871534	1	2.60818	1.44758
ENSMUSG00000020571	Pdia6	protein disulfide isomerase associated 6 [Source:MGI Symbol;Acc:MGI:1919103]	12	-1.19808	0.0871887	1	40.6057	33.8886
ENSMUSG00000033083	Tbc1d4	TBC1 domain family, member 4 [Source:MGI Symbol;Acc:MGI:2429660]	14	1.82677	0.0872488	1	0.465677	0.850904
ENSMUSG00000105556	Gm43080	predicted gene 43080 [Source:MGI Symbol;Acc:MGI:5663217]	3	-2.08273	0.0873026	1	1.11433	0.532216
ENSMUSG00000016995	Matn4	matrilin 4 [Source:MGI Symbol;Acc:MGI:1328314]	2	-2.32364	0.087308	1	0.656294	0.283066
ENSMUSG00000109489	Gm7451	predicted gene 7451 [Source:MGI Symbol;Acc:MGI:3645148]	8	3.00871	0.0874353	1	0.377053	1.16067
ENSMUSG00000030790	Adm	adrenomedullin [Source:MGI Symbol;Acc:MGI:108058]	7	-2.03755	0.0875054	1	1.97372	0.968773
ENSMUSG00000112411	Gm19337	predicted gene, 19337 [Source:MGI Symbol;Acc:MGI:5011522]	10	-2.32816	0.0875638	1	1.80833	0.77375
ENSMUSG00000043421	Hilpda	hypoxia inducible lipid droplet associated [Source:MGI Symbol;Acc:MGI:1916823]	6	2.35423	0.0878404	1	0.574967	1.36175
ENSMUSG00000020282	Rhbdf1	rhomboid 5 homolog 1 [Source:MGI Symbol;Acc:MGI:104328]	11	-1.28961	0.0878616	1	6.82233	5.28876
ENSMUSG00000048755	Mcat	malonyl CoA:ACP acyltransferase (mitochondrial) [Source:MGI Symbol;Acc:MGI:2388651]	15	1.57897	0.0879154	1	1.83539	2.90572
ENSMUSG00000112790	Gm33378	predicted gene, 33378 [Source:MGI Symbol;Acc:MGI:5592537]	10	-2.05003	0.0879301	1	0.93212	0.45193
ENSMUSG00000049323	Smcr8	Smith-Magenis syndrome chromosome region, candidate 8 homolog (human) [Source:MGI Symbol;Acc:MGI:2444720]	11	-1.24739	0.0879449	1	5.16254	4.13959
ENSMUSG00000021917	Spcs1	signal peptidase complex subunit 1 homolog (S. cerevisiae) [Source:MGI Symbol;Acc:MGI:1916269]	14	1.29096	0.0879527	1	12.411	16.0229
ENSMUSG00000056763	Cspp1	centrosome and spindle pole associated protein 1 [Source:MGI Symbol;Acc:MGI:2681832]	1	-1.32421	0.0879552	1	1.6727	1.26269
ENSMUSG00000064284	Cdpf1	cysteine rich, DPF motif domain containing 1 [Source:MGI Symbol;Acc:MGI:1919605]	15	-1.8649	0.0879669	1	3.47104	1.85747
ENSMUSG00000014668	Chfr	checkpoint with forkhead and ring finger domains [Source:MGI Symbol;Acc:MGI:2444898]	5	-1.4605	0.0881197	1	6.68344	4.57941
ENSMUSG00000069208	Zfp825	zinc finger protein 825 [Source:MGI Symbol;Acc:MGI:2385315]	13	-2.24625	0.0881258	1	1.18244	0.523356
ENSMUSG00000026255	Efhd1	EF hand domain containing 1 [Source:MGI Symbol;Acc:MGI:1921607]	1	2.21413	0.0881409	1	0.671344	1.49147
ENSMUSG00000106831	Ube2n-ps1	ubiquitin-conjugating enzyme E2N, pseudogene 1 [Source:MGI Symbol;Acc:MGI:894296]	5	-2.28005	0.0881609	1	6.50334	2.82535
ENSMUSG00000041180	Hectd2	HECT domain E3 ubiquitin protein ligase 2 [Source:MGI Symbol;Acc:MGI:2442663]	19	-1.93159	0.0884327	1	0.686534	0.355341
ENSMUSG00000036840	Siah1a	siah E3 ubiquitin protein ligase 1A [Source:MGI Symbol;Acc:MGI:108064]	8	-1.46537	0.0884808	1	7.52366	5.12595
ENSMUSG00000021468	Sptlc1	serine palmitoyltransferase, long chain base subunit 1 [Source:MGI Symbol;Acc:MGI:1099431]	13	1.36219	0.0884995	1	4.04141	5.50597
ENSMUSG00000025591	Tma16	translation machinery associated 16 [Source:MGI Symbol;Acc:MGI:1913532]	8	-1.30808	0.0885649	1	2.94204	2.24977
ENSMUSG00000107225	Gm43637	predicted gene 43637 [Source:MGI Symbol;Acc:MGI:5663774]	5	-2.04978	0.0888981	1	0.843989	0.411438
ENSMUSG00000050640	Tmem150c	transmembrane protein 150C [Source:MGI Symbol;Acc:MGI:3041258]	5	2.0997	0.0890119	1	1.48024	3.10841
ENSMUSG00000027774	Gfm1	G elongation factor, mitochondrial 1 [Source:MGI Symbol;Acc:MGI:107339]	3	1.29351	0.0891329	1	4.11424	5.32176
ENSMUSG00000032777	Gtf3c1	general transcription factor III C 1 [Source:MGI Symbol;Acc:MGI:107887]	7	1.20373	0.0891501	1	22.0369	26.5269
ENSMUSG00000094410	Gm38394	predicted gene, 38394 [Source:MGI Symbol;Acc:MGI:5614057]	1	-1.23248	0.0891551	1	10.7844	8.75293
ENSMUSG00000025371	Chmp6	charged multivesicular body protein 6 [Source:MGI Symbol;Acc:MGI:3583942]	11	1.32709	0.0892825	1	5.98706	7.94412
ENSMUSG00000044786	Zfp36	zinc finger protein 36 [Source:MGI Symbol;Acc:MGI:99180]	7	2.22094	0.089317	1	12.431	27.6118
ENSMUSG00000039414	Heatr5b	HEAT repeat containing 5B [Source:MGI Symbol;Acc:MGI:2444098]	17	1.27153	0.0893434	1	3.51314	4.46911
ENSMUSG00000050310	Rictor	RPTOR independent companion of MTOR, complex 2 [Source:MGI Symbol;Acc:MGI:1926007]	15	-1.23841	0.0895017	1	4.76945	3.85091
ENSMUSG00000091844	Gm8251	predicted gene 8251 [Source:MGI Symbol;Acc:MGI:3647616]	1	-2.16907	0.0895238	1	0.112055	0.0512749
ENSMUSG00000053198	Prx	periaxin [Source:MGI Symbol;Acc:MGI:108176]	7	-1.47836	0.0895284	1	24.6207	16.6537
ENSMUSG00000004530	Coro1c	coronin, actin binding protein 1C [Source:MGI Symbol;Acc:MGI:1345964]	5	-1.19078	0.0896569	1	9.20283	7.7298
ENSMUSG00000032845	Alpk2	alpha-kinase 2 [Source:MGI Symbol;Acc:MGI:2449492]	18	-2.11229	0.0897271	1	0.288043	0.134881
ENSMUSG00000024500	Ppp2r2b	protein phosphatase 2, regulatory subunit B, beta [Source:MGI Symbol;Acc:MGI:1920180]	18	-1.23189	0.0897649	1	11.1276	9.02948
ENSMUSG00000113070	Gm48420	predicted gene, 48420 [Source:MGI Symbol;Acc:MGI:6097914]	13	-1.92559	0.0897903	1	5.18862	2.68678
ENSMUSG00000033902	Mapkbp1	mitogen-activated protein kinase binding protein 1 [Source:MGI Symbol;Acc:MGI:1347004]	2	1.27671	0.0897975	1	2.82741	3.61026
ENSMUSG00000086682	Gm16023	predicted gene 16023 [Source:MGI Symbol;Acc:MGI:3802146]	4	-2.45802	0.0901359	1	0.996305	0.404369
ENSMUSG00000104369	Gm38082	predicted gene, 38082 [Source:MGI Symbol;Acc:MGI:5611310]	5	-2.62393	0.0901971	1	0.32826	0.124816
ENSMUSG00000064368	mt-Nd6	mitochondrially encoded NADH dehydrogenase 6 [Source:MGI Symbol;Acc:MGI:102495]	MT	1.25528	0.0902745	1	158.534	198.956
ENSMUSG00000042572	Ube2q1	ubiquitin-conjugating enzyme E2Q family member 1 [Source:MGI Symbol;Acc:MGI:1917343]	3	1.21204	0.0903101	1	7.93316	9.61646
ENSMUSG00000037996	Slc24a2	solute carrier family 24 (sodium/potassium/calcium exchanger), member 2 [Source:MGI Symbol;Acc:MGI:1923626]	4	-1.28818	0.0903698	1	3.76574	2.92445
ENSMUSG00000030852	Tacc2	transforming, acidic coiled-coil containing protein 2 [Source:MGI Symbol;Acc:MGI:1928899]	7	-1.25019	0.0904223	1	55.578	44.4568
ENSMUSG00000059970	Hspa2	heat shock protein 2 [Source:MGI Symbol;Acc:MGI:96243]	12	1.23393	0.0904399	1	14.5807	17.9935
ENSMUSG00000020034	Tcp11l2	t-complex 11 (mouse) like 2 [Source:MGI Symbol;Acc:MGI:2444679]	10	-1.37013	0.0904668	1	4.71026	3.43672
ENSMUSG00000037845	Fdxacb1	ferredoxin-fold anticodon binding domain containing 1 [Source:MGI Symbol;Acc:MGI:3584513]	9	-1.75232	0.0906259	1	1.26928	0.723935
ENSMUSG00000022575	Gsdmd	gasdermin D [Source:MGI Symbol;Acc:MGI:1916396]	15	2.81531	0.0906279	1	0.199265	0.566734
ENSMUSG00000074733	Zfp950	zinc finger protein 950 [Source:MGI Symbol;Acc:MGI:2652824]	19	-1.40791	0.0906484	1	1.53472	1.0898
ENSMUSG00000053219	Raet1e	retinoic acid early transcript 1E [Source:MGI Symbol;Acc:MGI:2675273]	10	2.35567	0.0906855	1	0.27915	0.664616
ENSMUSG00000009828	Cilk1	ciliogenesis associated kinase 1 [Source:MGI Symbol;Acc:MGI:1934157]	9	1.30566	0.0907539	1	1.66977	2.17903
ENSMUSG00000026087	Mrpl30	mitochondrial ribosomal protein L30 [Source:MGI Symbol;Acc:MGI:1333820]	1	-1.27427	0.0907633	1	11.6987	9.17852
ENSMUSG00000006143	Upk3bl	uroplakin 3B-like [Source:MGI Symbol;Acc:MGI:1916915]	5	1.61514	0.0908357	1	3.1153	5.02883
ENSMUSG00000036459	Wtip	WT1-interacting protein [Source:MGI Symbol;Acc:MGI:2141920]	7	1.33389	0.0908454	1	5.94779	7.93177
ENSMUSG00000003808	Farsa	phenylalanyl-tRNA synthetase, alpha subunit [Source:MGI Symbol;Acc:MGI:1913840]	8	-1.37572	0.0910979	1	4.73046	3.43577
ENSMUSG00000041193	Pla2g5	phospholipase A2, group V [Source:MGI Symbol;Acc:MGI:101899]	4	1.1961	0.0911201	1	38.5104	46.0615
ENSMUSG00000015653	Steap2	six transmembrane epithelial antigen of prostate 2 [Source:MGI Symbol;Acc:MGI:1921301]	5	1.20262	0.0911491	1	4.84745	5.82799
ENSMUSG00000006476	Nsmf	NMDA receptor synaptonuclear signaling and neuronal migration factor [Source:MGI Symbol;Acc:MGI:1861755]	2	-1.32561	0.0912685	1	7.04896	5.31702
ENSMUSG00000060143	Gm10076	predicted gene 10076 [Source:MGI Symbol;Acc:MGI:3704451]	14	1.39118	0.0912804	1	26.3641	36.676
ENSMUSG00000020330	Hmmr	hyaluronan mediated motility receptor (RHAMM) [Source:MGI Symbol;Acc:MGI:104667]	11	1.73179	0.0912853	1	0.458148	0.794794
ENSMUSG00000028873	Cdca8	cell division cycle associated 8 [Source:MGI Symbol;Acc:MGI:1196274]	4	2.17415	0.0913162	1	0.270664	0.591032
ENSMUSG00000018858	Mrpl58	mitochondrial ribosomal protein L58 [Source:MGI Symbol;Acc:MGI:1915822]	11	1.32225	0.0913567	1	4.9215	6.50783
ENSMUSG00000031365	Zfp275	zinc finger protein 275 [Source:MGI Symbol;Acc:MGI:1350985]	X	1.26732	0.0913868	1	3.47306	4.40145
ENSMUSG00000003161	Sri	sorcin [Source:MGI Symbol;Acc:MGI:98419]	5	-1.18632	0.0914212	1	18.9327	15.9582
ENSMUSG00000021476	Habp4	hyaluronic acid binding protein 4 [Source:MGI Symbol;Acc:MGI:1891713]	13	-1.21396	0.0915761	1	16.0618	13.2286
ENSMUSG00000085423	4930594M22Rik	RIKEN cDNA 4930594M22 gene [Source:MGI Symbol;Acc:MGI:1925478]	14	2.95347	0.0915963	1	0.930768	2.77668
ENSMUSG00000031540	Kat6a	K(lysine) acetyltransferase 6A [Source:MGI Symbol;Acc:MGI:2442415]	8	1.21447	0.0916379	1	16.4121	19.9315
ENSMUSG00000105643	Gm42611	predicted gene 42611 [Source:MGI Symbol;Acc:MGI:5662748]	3	-2.15856	0.0916522	1	1.00773	0.465991
ENSMUSG00000033998	Kcnk1	potassium channel, subfamily K, member 1 [Source:MGI Symbol;Acc:MGI:109322]	8	1.25144	0.0917806	1	38.6986	48.4169
ENSMUSG00000046157	Tmem229b	transmembrane protein 229B [Source:MGI Symbol;Acc:MGI:2444389]	12	1.58058	0.0918965	1	1.0818	1.70855
ENSMUSG00000013539	Tango2	transport and golgi organization 2 [Source:MGI Symbol;Acc:MGI:101825]	16	-1.47386	0.0918982	1	1.36716	0.927532
ENSMUSG00000052906	Ubxn8	UBX domain protein 8 [Source:MGI Symbol;Acc:MGI:1337129]	8	1.38462	0.0919224	1	4.25841	5.902
ENSMUSG00000021238	Aldh6a1	aldehyde dehydrogenase family 6, subfamily A1 [Source:MGI Symbol;Acc:MGI:1915077]	12	1.2093	0.0919561	1	8.4116	10.1724
ENSMUSG00000003617	Cp	ceruloplasmin [Source:MGI Symbol;Acc:MGI:88476]	3	1.22858	0.0919653	1	73.2129	89.9465
ENSMUSG00000056222	Spock1	sparc/osteonectin, cwcv and kazal-like domains proteoglycan 1 [Source:MGI Symbol;Acc:MGI:105371]	13	1.40824	0.0920865	1	11.8004	16.6165
ENSMUSG00000028910	Mecr	mitochondrial trans-2-enoyl-CoA reductase [Source:MGI Symbol;Acc:MGI:1349441]	4	-1.42581	0.0921385	1	5.30705	3.72802
ENSMUSG00000109314	Gm44699	predicted gene 44699 [Source:MGI Symbol;Acc:MGI:5753275]	7	-2.65032	0.0922021	1	0.934368	0.352241
ENSMUSG00000033669	Zfp7	zinc finger protein 7 [Source:MGI Symbol;Acc:MGI:99208]	15	-1.82485	0.0922239	1	1.05295	0.57419
ENSMUSG00000073658	Crygb	crystallin, gamma B [Source:MGI Symbol;Acc:MGI:88522]	1	2.42121	0.0922956	1	177.895	430.745
ENSMUSG00000037361	Sf3b6	splicing factor 3B, subunit 6 [Source:MGI Symbol;Acc:MGI:1913305]	12	-1.24987	0.0923183	1	12.0799	9.66215
ENSMUSG00000037341	Slc9a7	solute carrier family 9 (sodium/hydrogen exchanger), member 7 [Source:MGI Symbol;Acc:MGI:2444530]	X	2.00278	0.0923186	1	0.645296	1.29132
ENSMUSG00000056429	Tgoln1	trans-golgi network protein [Source:MGI Symbol;Acc:MGI:105080]	6	1.20235	0.0923236	1	23.3127	28.0306
ENSMUSG00000059434	Gckr	glucokinase regulatory protein [Source:MGI Symbol;Acc:MGI:1096345]	5	1.82418	0.0923438	1	1.04778	1.91118
ENSMUSG00000022849	Hspbap1	Hspb associated protein 1 [Source:MGI Symbol;Acc:MGI:1913917]	16	-1.79058	0.0923524	1	0.762334	0.426598
ENSMUSG00000062542	Syt9	synaptotagmin IX [Source:MGI Symbol;Acc:MGI:1926373]	7	1.97454	0.0924002	1	2.98342	5.89099
ENSMUSG00000115624	Gm49204	predicted gene, 49204 [Source:MGI Symbol;Acc:MGI:6118653]	14	-2.15304	0.0924061	1	0.561461	0.260466
ENSMUSG00000098557	Kctd12	potassium channel tetramerisation domain containing 12 [Source:MGI Symbol;Acc:MGI:2145823]	14	-1.47093	0.0924715	1	9.89238	6.72505
ENSMUSG00000064145	Arih2	ariadne RBR E3 ubiquitin protein ligase 2 [Source:MGI Symbol;Acc:MGI:1344361]	9	-1.21613	0.0924718	1	8.23881	6.77623
ENSMUSG00000085385	Snhg17	small nucleolar RNA host gene 17 [Source:MGI Symbol;Acc:MGI:1915358]	2	-1.48265	0.092635	1	2.12915	1.43692
ENSMUSG00000045534	Kcna5	potassium voltage-gated channel, shaker-related subfamily, member 5 [Source:MGI Symbol;Acc:MGI:96662]	6	1.44601	0.0928251	1	3.50299	5.06371
ENSMUSG00000023861	Mpc1	mitochondrial pyruvate carrier 1 [Source:MGI Symbol;Acc:MGI:1915240]	17	1.33265	0.0929477	1	9.93134	13.2404
ENSMUSG00000028670	Lypla2	lysophospholipase 2 [Source:MGI Symbol;Acc:MGI:1347000]	4	1.38987	0.093007	1	5.24287	7.29542
ENSMUSG00000057596	Trim30d	tripartite motif-containing 30D [Source:MGI Symbol;Acc:MGI:3035181]	7	2.36867	0.0931012	1	0.271257	0.645203
ENSMUSG00000054520	Sh3bp2	SH3-domain binding protein 2 [Source:MGI Symbol;Acc:MGI:1346349]	5	-1.52635	0.0932246	1	2.02483	1.32817
ENSMUSG00000025950	Idh1	isocitrate dehydrogenase 1 (NADP+), soluble [Source:MGI Symbol;Acc:MGI:96413]	1	1.2611	0.0932708	1	11.0657	13.9632
ENSMUSG00000112067	Gm48015	predicted gene, 48015 [Source:MGI Symbol;Acc:MGI:6097323]	12	-2.11529	0.0933765	1	3.19856	1.51263
ENSMUSG00000027469	Tpx2	TPX2, microtubule-associated [Source:MGI Symbol;Acc:MGI:1919369]	2	1.53046	0.0933783	1	1.43731	2.20054
ENSMUSG00000039633	Lonrf1	LON peptidase N-terminal domain and ring finger 1 [Source:MGI Symbol;Acc:MGI:3609241]	8	1.29008	0.0933789	1	6.72986	8.68077
ENSMUSG00000029823	Luc7l2	LUC7-like 2 (S. cerevisiae) [Source:MGI Symbol;Acc:MGI:2183260]	6	-1.24906	0.0935044	1	27.2255	21.7972
ENSMUSG00000061244	Exoc5	exocyst complex component 5 [Source:MGI Symbol;Acc:MGI:2145645]	14	-1.21361	0.0936051	1	3.22485	2.65707
ENSMUSG00000017386	Traf4	TNF receptor associated factor 4 [Source:MGI Symbol;Acc:MGI:1202880]	11	1.38911	0.0936398	1	6.9468	9.65116
ENSMUSG00000097354	2310001H17Rik	RIKEN cDNA 2310001H17 gene [Source:MGI Symbol;Acc:MGI:1923682]	6	1.49541	0.093644	1	0.905648	1.35438
ENSMUSG00000040183	Ankrd6	ankyrin repeat domain 6 [Source:MGI Symbol;Acc:MGI:2154278]	4	1.42409	0.0936758	1	1.80619	2.57412
ENSMUSG00000056288	Gm11961	predicted gene 11961 [Source:MGI Symbol;Acc:MGI:3652303]	11	-1.91749	0.0938493	1	2.46323	1.28315
ENSMUSG00000024042	Sik1	salt inducible kinase 1 [Source:MGI Symbol;Acc:MGI:104754]	17	1.62482	0.0939356	1	8.71778	14.1671
ENSMUSG00000074277	Phldb3	pleckstrin homology like domain, family B, member 3 [Source:MGI Symbol;Acc:MGI:3642959]	7	-2.49079	0.093946	1	0.579781	0.228715
ENSMUSG00000106166	Gm43484	predicted gene 43484 [Source:MGI Symbol;Acc:MGI:5663621]	3	-2.65938	0.094159	1	0.670483	0.252045
ENSMUSG00000097709	2810429I04Rik	RIKEN cDNA 2810429I04 gene [Source:MGI Symbol;Acc:MGI:1924187]	13	-1.97564	0.0942393	1	0.41461	0.209387
ENSMUSG00000061859	Patj	PATJ, crumbs cell polarity complex component [Source:MGI Symbol;Acc:MGI:1277960]	4	1.21572	0.0942653	1	4.62164	5.6168
ENSMUSG00000052214	Opa3	optic atrophy 3 [Source:MGI Symbol;Acc:MGI:2686271]	7	-1.34291	0.0943239	1	7.15734	5.33399
ENSMUSG00000098040	Gm20757	predicted gene, 20757 [Source:MGI Symbol;Acc:MGI:5434113]	10	-1.4839	0.0943672	1	6.26781	4.22197
ENSMUSG00000014778	Fhod1	formin homology 2 domain containing 1 [Source:MGI Symbol;Acc:MGI:2679008]	8	1.41014	0.0943808	1	2.54996	3.59664
ENSMUSG00000044365	Cxxc4	CXXC finger 4 [Source:MGI Symbol;Acc:MGI:2442112]	3	1.42552	0.0944665	1	0.894917	1.27467
ENSMUSG00000041268	Dmxl2	Dmx-like 2 [Source:MGI Symbol;Acc:MGI:2444630]	9	-1.21849	0.0945834	1	5.99538	4.9178
ENSMUSG00000031684	Slc10a7	solute carrier family 10 (sodium/bile acid cotransporter family), member 7 [Source:MGI Symbol;Acc:MGI:1924025]	8	1.4184	0.0946183	1	0.905181	1.28404
ENSMUSG00000028121	Bcar3	breast cancer anti-estrogen resistance 3 [Source:MGI Symbol;Acc:MGI:1352501]	3	-1.20695	0.0948178	1	24.512	20.3123
ENSMUSG00000029033	Acap3	ArfGAP with coiled-coil, ankyrin repeat and PH domains 3 [Source:MGI Symbol;Acc:MGI:2153589]	4	-1.34534	0.0951642	1	3.6302	2.69864
ENSMUSG00000021007	Spata7	spermatogenesis associated 7 [Source:MGI Symbol;Acc:MGI:2144877]	12	-1.53312	0.0951696	1	1.36457	0.890623
ENSMUSG00000107604	Gm44041	predicted gene, 44041 [Source:MGI Symbol;Acc:MGI:5690433]	6	-2.16721	0.0956798	1	3.57005	1.63676
ENSMUSG00000037363	Letm2	leucine zipper-EF-hand containing transmembrane protein 2 [Source:MGI Symbol;Acc:MGI:2444979]	8	1.54387	0.0957301	1	0.812221	1.2534
ENSMUSG00000049866	Arl4c	ADP-ribosylation factor-like 4C [Source:MGI Symbol;Acc:MGI:2445172]	1	-1.39553	0.0957792	1	3.70232	2.65203
ENSMUSG00000020677	Ddx52	DExD box helicase 52 [Source:MGI Symbol;Acc:MGI:1925644]	11	-1.2952	0.0957991	1	8.13333	6.2752
ENSMUSG00000037580	Gch1	GTP cyclohydrolase 1 [Source:MGI Symbol;Acc:MGI:95675]	14	-2.29022	0.0959343	1	0.475409	0.206834
ENSMUSG00000041842	Fhdc1	FH2 domain containing 1 [Source:MGI Symbol;Acc:MGI:2684972]	3	3.09831	0.0959824	1	1.34219	4.1612
ENSMUSG00000102419	Gm36940	predicted gene, 36940 [Source:MGI Symbol;Acc:MGI:5610168]	9	-2.42417	0.0960128	1	1.62211	0.669906
ENSMUSG00000026707	Nsun6	NOL1/NOP2/Sun domain family member 6 [Source:MGI Symbol;Acc:MGI:1921705]	2	-1.65146	0.0960268	1	1.0349	0.624846
ENSMUSG00000062200	Vmn2r7	vomeronasal 2, receptor 7 [Source:MGI Symbol;Acc:MGI:2441693]	3	2.78401	0.096036	1	0.0634117	0.178417
ENSMUSG00000093639	Gm52993	predicted gene, 52993 [Source:MGI Symbol;Acc:MGI:6388878]	7	-2.15644	0.0960583	1	1.12549	0.521197
ENSMUSG00000030126	Tmcc1	transmembrane and coiled coil domains 1 [Source:MGI Symbol;Acc:MGI:2442368]	6	-1.20095	0.0961227	1	4.40437	3.66785
ENSMUSG00000045690	Wdr89	WD repeat domain 89 [Source:MGI Symbol;Acc:MGI:1919588]	12	2.79521	0.0961379	1	0.179401	0.503998
ENSMUSG00000078578	Ube2d3	ubiquitin-conjugating enzyme E2D 3 [Source:MGI Symbol;Acc:MGI:1913355]	3	-1.19778	0.0961617	1	8.07334	6.74114
ENSMUSG00000031700	Gpt2	glutamic pyruvate transaminase (alanine aminotransferase) 2 [Source:MGI Symbol;Acc:MGI:1915391]	8	-1.72139	0.0961842	1	0.805893	0.466899
ENSMUSG00000025272	Tro	trophinin [Source:MGI Symbol;Acc:MGI:1928994]	X	1.64358	0.0962295	1	0.982221	1.61288
ENSMUSG00000034040	Galnt17	polypeptide N-acetylgalactosaminyltransferase 17 [Source:MGI Symbol;Acc:MGI:2137594]	5	-1.79446	0.0962297	1	0.404173	0.225468
ENSMUSG00000018830	Myh11	myosin, heavy polypeptide 11, smooth muscle [Source:MGI Symbol;Acc:MGI:102643]	16	-2.15111	0.0962311	1	1.96433	0.911281
ENSMUSG00000052428	Tmco1	transmembrane and coiled-coil domains 1 [Source:MGI Symbol;Acc:MGI:1921173]	1	1.23424	0.096248	1	7.47948	9.22941
ENSMUSG00000078905	Gm14393	predicted gene 14393 [Source:MGI Symbol;Acc:MGI:3649576]	2	-2.17126	0.096258	1	1.57755	0.718953
ENSMUSG00000094441	Zfp955a	zinc finger protein 955A [Source:MGI Symbol;Acc:MGI:4834570]	17	-1.44496	0.0962954	1	3.76424	2.6038
ENSMUSG00000038370	Pcp4l1	Purkinje cell protein 4-like 1 [Source:MGI Symbol;Acc:MGI:1913675]	1	1.26401	0.0963466	1	65.0948	82.2903
ENSMUSG00000103591	Gm38365	predicted gene, 38365 [Source:MGI Symbol;Acc:MGI:5611593]	1	-2.52611	0.0964435	1	0.472645	0.185789
ENSMUSG00000022214	Dcaf11	DDB1 and CUL4 associated factor 11 [Source:MGI Symbol;Acc:MGI:90168]	14	-1.19369	0.0964663	1	10.1674	8.51856
ENSMUSG00000046169	Adamts6	a disintegrin-like and metallopeptidase (reprolysin type) with thrombospondin type 1 motif, 6 [Source:MGI Symbol;Acc:MGI:1347348]	13	-1.34795	0.0964749	1	5.05642	3.75173
ENSMUSG00000038055	Dexi	dexamethasone-induced transcript [Source:MGI Symbol;Acc:MGI:1926236]	16	1.42058	0.0966582	1	2.65049	3.77045
ENSMUSG00000034789	Rab24	RAB24, member RAS oncogene family [Source:MGI Symbol;Acc:MGI:105065]	13	-1.30036	0.0967463	1	11.9259	9.17846
ENSMUSG00000063888	Rpl7l1	ribosomal protein L7-like 1 [Source:MGI Symbol;Acc:MGI:1913479]	17	-1.24177	0.0973105	1	10.3321	8.32115
ENSMUSG00000006411	Nectin4	nectin cell adhesion molecule 4 [Source:MGI Symbol;Acc:MGI:1918990]	1	1.42379	0.0974089	1	2.20088	3.13422
ENSMUSG00000085105	Gm12758	predicted gene 12758 [Source:MGI Symbol;Acc:MGI:3702543]	7	1.97741	0.0974222	1	0.397426	0.786496
ENSMUSG00000050195	Scd4	stearoyl-coenzyme A desaturase 4 [Source:MGI Symbol;Acc:MGI:2670997]	19	-2.64645	0.0974332	1	0.508751	0.191187
ENSMUSG00000027199	Gatm	glycine amidinotransferase (L-arginine:glycine amidinotransferase) [Source:MGI Symbol;Acc:MGI:1914342]	2	2.01219	0.0974546	1	0.333942	0.674541
ENSMUSG00000026404	Ddx59	DEAD box helicase 59 [Source:MGI Symbol;Acc:MGI:1915247]	1	1.48288	0.0976104	1	2.12621	3.15808
ENSMUSG00000059714	Flot1	flotillin 1 [Source:MGI Symbol;Acc:MGI:1100500]	17	-1.22545	0.0977271	1	25.2369	20.5925
ENSMUSG00000036214	Polr1has	RNA polymerase I subunit H, antisense [Source:MGI Symbol;Acc:MGI:1923666]	17	1.80471	0.0978703	1	1.10016	1.988
ENSMUSG00000047146	Tet1	tet methylcytosine dioxygenase 1 [Source:MGI Symbol;Acc:MGI:1098693]	10	1.3211	0.0980684	1	2.38136	3.14757
ENSMUSG00000026819	Slc25a25	solute carrier family 25 (mitochondrial carrier, phosphate carrier), member 25 [Source:MGI Symbol;Acc:MGI:1915913]	2	1.32761	0.0982294	1	4.34394	5.76672
ENSMUSG00000036667	Tcaf1	TRPM8 channel-associated factor 1 [Source:MGI Symbol;Acc:MGI:1914665]	6	1.19833	0.098264	1	9.91029	11.8763
ENSMUSG00000020601	Trib2	tribbles pseudokinase 2 [Source:MGI Symbol;Acc:MGI:2145021]	12	-1.34419	0.0983774	1	4.98643	3.70553
ENSMUSG00000041736	Tspo	translocator protein [Source:MGI Symbol;Acc:MGI:88222]	15	1.47097	0.0984728	1	5.97654	8.79097
ENSMUSG00000020605	Hs1bp3	HCLS1 binding protein 3 [Source:MGI Symbol;Acc:MGI:1913224]	12	1.5829	0.0985823	1	1.64366	2.59881
ENSMUSG00000058064	Gm10036	predicted gene 10036 [Source:MGI Symbol;Acc:MGI:3642334]	18	-1.64189	0.0985931	1	14.2309	8.67659
ENSMUSG00000034071	Zfp551	zinc fingr protein 551 [Source:MGI Symbol;Acc:MGI:3588205]	7	-1.58908	0.0986185	1	3.23125	2.03598
ENSMUSG00000067279	Ppp1r3c	protein phosphatase 1, regulatory subunit 3C [Source:MGI Symbol;Acc:MGI:1858229]	19	-1.98527	0.0987559	1	1.73474	0.87174
ENSMUSG00000097101	1810034E14Rik	RIKEN cDNA 1810034E14 gene [Source:MGI Symbol;Acc:MGI:1913753]	13	-1.92282	0.0989789	1	1.73625	0.896681
ENSMUSG00000028849	Map7d1	MAP7 domain containing 1 [Source:MGI Symbol;Acc:MGI:2384297]	4	-1.19425	0.0993389	1	38.4333	32.185
ENSMUSG00000033411	Ctdspl2	CTD (carboxy-terminal domain, RNA polymerase II, polypeptide A) small phosphatase like 2 [Source:MGI Symbol;Acc:MGI:1196405]	2	-1.21536	0.0994269	1	5.91205	4.86359
ENSMUSG00000055022	Cntn1	contactin 1 [Source:MGI Symbol;Acc:MGI:105980]	15	1.94523	0.099547	1	2.06167	4.00985
ENSMUSG00000102672	Gm37105	predicted gene, 37105 [Source:MGI Symbol;Acc:MGI:5610333]	9	-2.30871	0.0996022	1	0.943824	0.407989
ENSMUSG00000048078	Tenm4	teneurin transmembrane protein 4 [Source:MGI Symbol;Acc:MGI:2447063]	7	1.54697	0.0996048	1	8.29267	12.8282
ENSMUSG00000008398	Elk3	ELK3, member of ETS oncogene family [Source:MGI Symbol;Acc:MGI:101762]	10	1.62946	0.0997501	1	1.21622	1.98013
ENSMUSG00000015143	Actn1	actinin, alpha 1 [Source:MGI Symbol;Acc:MGI:2137706]	12	1.20409	0.0997505	1	17.4949	21.0675
ENSMUSG00000020340	Cyfip2	cytoplasmic FMR1 interacting protein 2 [Source:MGI Symbol;Acc:MGI:1924134]	11	-1.18895	0.0997579	1	17.5443	14.7533
ENSMUSG00000028572	Hook1	hook microtubule tethering protein 1 [Source:MGI Symbol;Acc:MGI:1925213]	4	-1.21301	0.0998184	1	6.86302	5.65827
ENSMUSG00000031558	Slit2	slit guidance ligand 2 [Source:MGI Symbol;Acc:MGI:1315205]	5	1.63273	0.0999891	1	2.24659	3.66783
ENSMUSG00000034282	Evpl	envoplakin [Source:MGI Symbol;Acc:MGI:107507]	11	1.24981	0.100051	1	10.9674	13.7029
ENSMUSG00000042632	Pla2g6	phospholipase A2, group VI [Source:MGI Symbol;Acc:MGI:1859152]	15	1.3817	0.100094	1	1.96329	2.71098
ENSMUSG00000027495	Fam210b	family with sequence similarity 210, member B [Source:MGI Symbol;Acc:MGI:1914267]	2	1.20909	0.100245	1	21.9803	26.5776
ENSMUSG00000111669	Gm31698	predicted gene, 31698 [Source:MGI Symbol;Acc:MGI:5590857]	9	-1.81836	0.100314	1	2.67878	1.46442
ENSMUSG00000039747	Orai2	ORAI calcium release-activated calcium modulator 2 [Source:MGI Symbol;Acc:MGI:2443195]	5	-1.33814	0.100488	1	3.04387	2.27478
ENSMUSG00000057406	Nsd2	nuclear receptor binding SET domain protein 2 [Source:MGI Symbol;Acc:MGI:1276574]	5	-1.20059	0.100511	1	7.52414	6.26809
ENSMUSG00000038784	Cnot4	CCR4-NOT transcription complex, subunit 4 [Source:MGI Symbol;Acc:MGI:1859026]	6	-1.26044	0.100606	1	3.78823	3.00477
ENSMUSG00000031451	Gas6	growth arrest specific 6 [Source:MGI Symbol;Acc:MGI:95660]	8	1.21738	0.100632	1	74.3572	90.5154
ENSMUSG00000031070	Mrgprf	MAS-related GPR, member F [Source:MGI Symbol;Acc:MGI:2384823]	7	1.729	0.100722	1	1.80851	3.13099
ENSMUSG00000022797	Tfrc	transferrin receptor [Source:MGI Symbol;Acc:MGI:98822]	16	1.18699	0.100755	1	15.6958	18.6302
ENSMUSG00000021846	Peli2	pellino 2 [Source:MGI Symbol;Acc:MGI:1891445]	14	-1.28683	0.10089	1	5.44241	4.22823
ENSMUSG00000103662	Gm34294	predicted gene, 34294 [Source:MGI Symbol;Acc:MGI:5593453]	2	-2.10646	0.101005	1	0.630296	0.299149
ENSMUSG00000085569	Gm12602	predicted gene 12602 [Source:MGI Symbol;Acc:MGI:3651757]	4	2.31226	0.10107	1	12.9321	29.9133
ENSMUSG00000051790	Nlgn2	neuroligin 2 [Source:MGI Symbol;Acc:MGI:2681835]	11	1.22767	0.101221	1	11.0088	13.5151
ENSMUSG00000069237	Fam8a1	family with sequence similarity 8, member A1 [Source:MGI Symbol;Acc:MGI:2145496]	13	-1.25916	0.101425	1	8.01691	6.36328
ENSMUSG00000030525	Chrna7	cholinergic receptor, nicotinic, alpha polypeptide 7 [Source:MGI Symbol;Acc:MGI:99779]	7	-2.02336	0.101787	1	0.363999	0.178425
ENSMUSG00000027006	Dnajc10	DnaJ heat shock protein family (Hsp40) member C10 [Source:MGI Symbol;Acc:MGI:1914111]	2	1.22597	0.101802	1	10.7362	13.161
ENSMUSG00000037112	Sik2	salt inducible kinase 2 [Source:MGI Symbol;Acc:MGI:2445031]	9	-1.23537	0.101805	1	5.09827	4.12787
ENSMUSG00000026123	Plekhb2	pleckstrin homology domain containing, family B (evectins) member 2 [Source:MGI Symbol;Acc:MGI:2385825]	1	1.25538	0.101891	1	4.71679	5.91761
ENSMUSG00000019055	Plod1	procollagen-lysine, 2-oxoglutarate 5-dioxygenase 1 [Source:MGI Symbol;Acc:MGI:99907]	4	1.30186	0.101972	1	4.20907	5.48081
ENSMUSG00000000184	Ccnd2	cyclin D2 [Source:MGI Symbol;Acc:MGI:88314]	6	1.20726	0.102126	1	45.1372	54.4929
ENSMUSG00000042694	Stn1	STN1, CST complex subunit [Source:MGI Symbol;Acc:MGI:1915581]	19	1.45618	0.10226	1	1.97361	2.8739
ENSMUSG00000004500	Zfp324	zinc finger protein 324 [Source:MGI Symbol;Acc:MGI:2444641]	7	1.42232	0.102449	1	2.13372	3.03402
ENSMUSG00000056832	Ttc26	tetratricopeptide repeat domain 26 [Source:MGI Symbol;Acc:MGI:2444853]	6	1.93963	0.102558	1	0.381088	0.742365
ENSMUSG00000068921	Dap3	death associated protein 3 [Source:MGI Symbol;Acc:MGI:1929538]	3	1.26955	0.102645	1	3.90019	4.95522
ENSMUSG00000075470	Alg10b	asparagine-linked glycosylation 10B (alpha-1,2-glucosyltransferase) [Source:MGI Symbol;Acc:MGI:2146159]	15	1.20723	0.102872	1	7.94606	9.59296
ENSMUSG00000048015	Neurod4	neurogenic differentiation 4 [Source:MGI Symbol;Acc:MGI:108055]	10	-2.09638	0.103229	1	1.28691	0.609432
ENSMUSG00000019944	Rhobtb1	Rho-related BTB domain containing 1 [Source:MGI Symbol;Acc:MGI:1916538]	10	-1.73599	0.103258	1	0.950089	0.545466
ENSMUSG00000035105	Egln3	egl-9 family hypoxia-inducible factor 3 [Source:MGI Symbol;Acc:MGI:1932288]	12	1.43921	0.103285	1	6.74601	9.71207
ENSMUSG00000050592	Fam78a	family with sequence similarity 78, member A [Source:MGI Symbol;Acc:MGI:2443569]	2	-2.18197	0.10331	1	0.371484	0.16973
ENSMUSG00000097772	5430416N02Rik	RIKEN cDNA 5430416N02 gene [Source:MGI Symbol;Acc:MGI:1918676]	5	-1.45905	0.103321	1	2.62196	1.79846
ENSMUSG00000034855	Cxcl10	chemokine (C-X-C motif) ligand 10 [Source:MGI Symbol;Acc:MGI:1352450]	5	2.03165	0.103323	1	4.74277	9.64395
ENSMUSG00000016256	Ctsz	cathepsin Z [Source:MGI Symbol;Acc:MGI:1891190]	2	1.20317	0.10349	1	31.7332	38.1849
ENSMUSG00000027947	Il6ra	interleukin 6 receptor, alpha [Source:MGI Symbol;Acc:MGI:105304]	3	-2.02847	0.103722	1	0.275908	0.13592
ENSMUSG00000022180	Slc7a8	solute carrier family 7 (cationic amino acid transporter, y+ system), member 8 [Source:MGI Symbol;Acc:MGI:1355323]	14	1.21092	0.103742	1	170.86	206.899
ENSMUSG00000063953	Amd2	S-adenosylmethionine decarboxylase 2 [Source:MGI Symbol;Acc:MGI:1333111]	10	2.17615	0.103916	1	0.195194	0.429047
ENSMUSG00000039318	Rab3gap2	RAB3 GTPase activating protein subunit 2 [Source:MGI Symbol;Acc:MGI:1916043]	1	-1.25936	0.103935	1	5.61094	4.45655
ENSMUSG00000024493	Lars	leucyl-tRNA synthetase [Source:MGI Symbol;Acc:MGI:1913808]	18	1.19931	0.103969	1	10.5198	12.615
ENSMUSG00000044150	Bclaf3	Bclaf1 and Thrap3 family member 3 [Source:MGI Symbol;Acc:MGI:2685992]	X	-1.35726	0.104001	1	4.06975	2.99867
ENSMUSG00000024013	Fgd2	FYVE, RhoGEF and PH domain containing 2 [Source:MGI Symbol;Acc:MGI:1347084]	17	3.61896	0.104077	1	0.084825	0.312672
ENSMUSG00000020893	Per1	period circadian clock 1 [Source:MGI Symbol;Acc:MGI:1098283]	11	1.22878	0.104143	1	42.4479	52.1576
ENSMUSG00000023994	Nfya	nuclear transcription factor-Y alpha [Source:MGI Symbol;Acc:MGI:97316]	17	1.50142	0.104228	1	1.34528	2.02175
ENSMUSG00000113106	Gm47139	predicted gene, 47139 [Source:MGI Symbol;Acc:MGI:6095898]	12	-2.58638	0.104267	1	0.990617	0.38248
ENSMUSG00000025468	Caly	calcyon neuron-specific vesicular protein [Source:MGI Symbol;Acc:MGI:1915816]	7	-2.51367	0.104321	1	1.03202	0.405195
ENSMUSG00000107868	Gm5112	predicted gene 5112 [Source:MGI Symbol;Acc:MGI:3779460]	6	2.32963	0.104354	1	0.384708	0.8979
ENSMUSG00000089809	Rasgef1b	RasGEF domain family, member 1B [Source:MGI Symbol;Acc:MGI:2443755]	5	-1.40915	0.10448	1	1.11475	0.790064
ENSMUSG00000026430	Rassf5	Ras association (RalGDS/AF-6) domain family member 5 [Source:MGI Symbol;Acc:MGI:1926375]	1	-1.33635	0.104523	1	6.10096	4.56473
ENSMUSG00000025092	Hspa12a	heat shock protein 12A [Source:MGI Symbol;Acc:MGI:1920692]	19	-1.45324	0.104556	1	1.52995	1.05005
ENSMUSG00000085303	Gm16751	predicted gene, 16751 [Source:MGI Symbol;Acc:MGI:4439675]	2	-2.70632	0.104793	1	1.0467	0.382438
ENSMUSG00000045160	Bola3	bolA-like 3 (E. coli) [Source:MGI Symbol;Acc:MGI:1925903]	6	-1.25082	0.104997	1	11.0155	8.80041
ENSMUSG00000030402	Ppm1n	protein phosphatase, Mg2+/Mn2+ dependent, 1N (putative) [Source:MGI Symbol;Acc:MGI:2142330]	7	-2.17897	0.105005	1	0.935653	0.423858
ENSMUSG00000055322	Tns1	tensin 1 [Source:MGI Symbol;Acc:MGI:104552]	1	1.21713	0.105286	1	14.0226	17.0676
ENSMUSG00000106978	N4bp2os	NEDD4 binding protein 2, opposite strand [Source:MGI Symbol;Acc:MGI:1921484]	5	-2.48553	0.105304	1	0.826268	0.332085
ENSMUSG00000021890	Eaf1	ELL associated factor 1 [Source:MGI Symbol;Acc:MGI:1921677]	14	-1.19679	0.10531	1	15.7881	13.1927
ENSMUSG00000032231	Anxa2	annexin A2 [Source:MGI Symbol;Acc:MGI:88246]	9	-1.21713	0.105353	1	45.5066	37.3945
ENSMUSG00000028134	Ptbp2	polypyrimidine tract binding protein 2 [Source:MGI Symbol;Acc:MGI:1860489]	3	-1.58524	0.105393	1	5.77167	3.64114
ENSMUSG00000021250	Fos	FBJ osteosarcoma oncogene [Source:MGI Symbol;Acc:MGI:95574]	12	3.03752	0.105551	1	28.9665	87.9941
ENSMUSG00000064080	Fbln2	fibulin 2 [Source:MGI Symbol;Acc:MGI:95488]	6	-2.75825	0.105552	1	0.931758	0.336746
ENSMUSG00000060703	Cd302	CD302 antigen [Source:MGI Symbol;Acc:MGI:1913455]	2	1.50681	0.1056	1	3.88184	5.84634
ENSMUSG00000027082	Tfpi	tissue factor pathway inhibitor [Source:MGI Symbol;Acc:MGI:1095418]	2	-1.32823	0.10568	1	3.2881	2.4764
ENSMUSG00000047139	Cd24a	CD24a antigen [Source:MGI Symbol;Acc:MGI:88323]	10	-1.22752	0.105723	1	690.255	562.319
ENSMUSG00000027239	Mdk	midkine [Source:MGI Symbol;Acc:MGI:96949]	2	1.49193	0.105761	1	8.43748	12.5766
ENSMUSG00000027894	Slc6a17	solute carrier family 6 (neurotransmitter transporter), member 17 [Source:MGI Symbol;Acc:MGI:2442535]	3	1.21326	0.105857	1	5.83004	7.07266
ENSMUSG00000029769	Ccdc136	coiled-coil domain containing 136 [Source:MGI Symbol;Acc:MGI:1918128]	6	-1.18766	0.105922	1	40.478	34.0837
ENSMUSG00000022978	Mis18a	MIS18 kinetochore protein A [Source:MGI Symbol;Acc:MGI:1913828]	16	2.07963	0.105974	1	0.308729	0.644031
ENSMUSG00000003352	Cacnb3	calcium channel, voltage-dependent, beta 3 subunit [Source:MGI Symbol;Acc:MGI:103307]	15	1.54921	0.105991	1	1.24345	1.92684
ENSMUSG00000022856	Tmem41a	transmembrane protein 41a [Source:MGI Symbol;Acc:MGI:1913914]	16	-1.99784	0.106023	1	1.56517	0.779402
ENSMUSG00000104292	Gm38042	predicted gene, 38042 [Source:MGI Symbol;Acc:MGI:5611270]	8	-1.94111	0.106061	1	0.704314	0.35976
ENSMUSG00000097042	Gm17491	predicted gene, 17491 [Source:MGI Symbol;Acc:MGI:4937125]	8	-1.79961	0.10614	1	4.41765	2.45628
ENSMUSG00000002625	Akap8l	A kinase (PRKA) anchor protein 8-like [Source:MGI Symbol;Acc:MGI:1860606]	17	-1.18567	0.106167	1	18.3369	15.4625
ENSMUSG00000037999	Arap2	ArfGAP with RhoGAP domain, ankyrin repeat and PH domain 2 [Source:MGI Symbol;Acc:MGI:2684416]	5	1.22111	0.106216	1	3.21418	3.92356
ENSMUSG00000039357	Fut11	fucosyltransferase 11 [Source:MGI Symbol;Acc:MGI:1920318]	14	1.35399	0.106269	1	3.30504	4.47594
ENSMUSG00000021918	Nek4	NIMA (never in mitosis gene a)-related expressed kinase 4 [Source:MGI Symbol;Acc:MGI:1344404]	14	1.31704	0.106278	1	1.7891	2.35833
ENSMUSG00000023169	Slc38a1	solute carrier family 38, member 1 [Source:MGI Symbol;Acc:MGI:2145895]	15	-1.40558	0.106483	1	4.55232	3.2389
ENSMUSG00000040433	Zbtb38	zinc finger and BTB domain containing 38 [Source:MGI Symbol;Acc:MGI:2442866]	9	-1.20748	0.106533	1	17.0595	14.1295
ENSMUSG00000073485	H3f3aos	H3.3 histone A, opposite strand [Source:MGI Symbol;Acc:MGI:3802006]	1	-2.65158	0.106603	1	0.514702	0.192402
ENSMUSG00000037049	Smpd1	sphingomyelin phosphodiesterase 1, acid lysosomal [Source:MGI Symbol;Acc:MGI:98325]	7	1.21909	0.10674	1	13.2208	16.1191
ENSMUSG00000104125	Gm37488	predicted gene, 37488 [Source:MGI Symbol;Acc:MGI:5610716]	3	-2.61837	0.106837	1	0.624327	0.238397
ENSMUSG00000063229	Ldha	lactate dehydrogenase A [Source:MGI Symbol;Acc:MGI:96759]	7	1.20382	0.106911	1	90.172	108.552
ENSMUSG00000020099	Unc5b	unc-5 netrin receptor B [Source:MGI Symbol;Acc:MGI:894703]	10	1.6014	0.107027	1	0.979823	1.56842
ENSMUSG00000067928	Zfp760	zinc finger protein 760 [Source:MGI Symbol;Acc:MGI:2679257]	17	-1.50163	0.107059	1	2.0312	1.3509
ENSMUSG00000112639	A730063M14Rik	RIKEN cDNA A730063M14 gene [Source:MGI Symbol;Acc:MGI:2443898]	10	2.16024	0.107127	1	0.373808	0.813427
ENSMUSG00000039187	Fanci	Fanconi anemia, complementation group I [Source:MGI Symbol;Acc:MGI:2384790]	7	1.9401	0.107371	1	0.195319	0.380532
ENSMUSG00000021508	Cxcl14	chemokine (C-X-C motif) ligand 14 [Source:MGI Symbol;Acc:MGI:1888514]	13	-1.22973	0.107531	1	29.1478	23.6981
ENSMUSG00000031681	Smad1	SMAD family member 1 [Source:MGI Symbol;Acc:MGI:109452]	8	-1.24972	0.107608	1	4.89	3.91412
ENSMUSG00000113003	Gm47138	predicted gene, 47138 [Source:MGI Symbol;Acc:MGI:6095896]	12	-2.65774	0.107676	1	0.954526	0.357547
ENSMUSG00000015476	Prrt1	proline-rich transmembrane protein 1 [Source:MGI Symbol;Acc:MGI:1932118]	17	1.89167	0.107678	1	1.50253	2.84296
ENSMUSG00000052364	B630019K06Rik	RIKEN cDNA B630019K06 gene [Source:MGI Symbol;Acc:MGI:2147918]	X	-1.51754	0.107709	1	2.94433	1.9408
ENSMUSG00000049908	Gja8	gap junction protein, alpha 8 [Source:MGI Symbol;Acc:MGI:99953]	3	1.23824	0.107818	1	237.413	293.977
ENSMUSG00000110556	Gm45762	predicted gene 45762 [Source:MGI Symbol;Acc:MGI:5804877]	8	-2.05901	0.107853	1	1.00568	0.488589
ENSMUSG00000107512	Gm44433	predicted gene, 44433 [Source:MGI Symbol;Acc:MGI:5690825]	6	-3.0669	0.107983	1	1.96176	0.638953
ENSMUSG00000025036	Sfxn2	sideroflexin 2 [Source:MGI Symbol;Acc:MGI:2137678]	19	-1.45498	0.108313	1	1.79793	1.23459
ENSMUSG00000002578	Ikzf4	IKAROS family zinc finger 4 [Source:MGI Symbol;Acc:MGI:1343139]	10	1.37726	0.108641	1	2.08709	2.87378
ENSMUSG00000020250	Txnrd1	thioredoxin reductase 1 [Source:MGI Symbol;Acc:MGI:1354175]	10	-1.22178	0.108677	1	16.7351	13.6984
ENSMUSG00000033909	Usp36	ubiquitin specific peptidase 36 [Source:MGI Symbol;Acc:MGI:1919594]	11	-1.27779	0.108694	1	5.69649	4.46088
ENSMUSG00000038217	Tlcd2	TLC domain containing 2 [Source:MGI Symbol;Acc:MGI:1917141]	11	1.64046	0.108894	1	1.6353	2.69275
ENSMUSG00000034292	Traf3ip1	TRAF3 interacting protein 1 [Source:MGI Symbol;Acc:MGI:1921269]	1	1.37049	0.108922	1	3.02366	4.14317
ENSMUSG00000021054	Sgpp1	sphingosine-1-phosphate phosphatase 1 [Source:MGI Symbol;Acc:MGI:2135760]	12	1.35392	0.10893	1	3.2215	4.35878
ENSMUSG00000028958	Tmub1	transmembrane and ubiquitin-like domain containing 1 [Source:MGI Symbol;Acc:MGI:1923764]	5	1.52383	0.108959	1	3.44019	5.24217
ENSMUSG00000030245	Golt1b	golgi transport 1B [Source:MGI Symbol;Acc:MGI:1914214]	6	-1.40858	0.108966	1	5.67954	4.03344
ENSMUSG00000015889	Lta4h	leukotriene A4 hydrolase [Source:MGI Symbol;Acc:MGI:96836]	10	-1.22128	0.108994	1	6.688	5.47746
ENSMUSG00000042256	Ptchd4	patched domain containing 4 [Source:MGI Symbol;Acc:MGI:1920485]	17	2.06865	0.109065	1	0.246664	0.51123
ENSMUSG00000030655	Smg1	SMG1 homolog, phosphatidylinositol 3-kinase-related kinase (C. elegans) [Source:MGI Symbol;Acc:MGI:1919742]	7	-1.21875	0.109198	1	7.65979	6.28561
ENSMUSG00000052430	Bmpr1b	bone morphogenetic protein receptor, type 1B [Source:MGI Symbol;Acc:MGI:107191]	3	2.09137	0.10925	1	0.404868	0.847857
ENSMUSG00000108348	Gm42372	predicted gene, 42372 [Source:MGI Symbol;Acc:MGI:5625257]	7	-2.58121	0.109324	1	0.225241	0.0839497
ENSMUSG00000085828	Gm15612	predicted gene 15612 [Source:MGI Symbol;Acc:MGI:3641714]	6	1.82253	0.10973	1	1.98397	3.6137
ENSMUSG00000021327	Zkscan3	zinc finger with KRAB and SCAN domains 3 [Source:MGI Symbol;Acc:MGI:1919989]	13	-1.28249	0.110075	1	3.22778	2.51559
ENSMUSG00000030374	Strn4	striatin, calmodulin binding protein 4 [Source:MGI Symbol;Acc:MGI:2142346]	7	-1.18005	0.110123	1	14.0029	11.8688
ENSMUSG00000029661	Col1a2	collagen, type I, alpha 2 [Source:MGI Symbol;Acc:MGI:88468]	6	2.54075	0.110203	1	2.2661	5.75856
ENSMUSG00000048647	Exd1	exonuclease 3'-5' domain containing 1 [Source:MGI Symbol;Acc:MGI:3045306]	2	1.83733	0.110206	1	0.290579	0.536435
ENSMUSG00000050796	B3galt6	UDP-Gal:betaGal beta 1,3-galactosyltransferase, polypeptide 6 [Source:MGI Symbol;Acc:MGI:2152819]	4	1.56568	0.110272	1	2.37413	3.71865
ENSMUSG00000102715	Gm6209	predicted gene 6209 [Source:MGI Symbol;Acc:MGI:3643374]	3	1.69885	0.110454	1	1.59355	2.70518
ENSMUSG00000018427	Ypel2	yippee like 2 [Source:MGI Symbol;Acc:MGI:1925114]	11	-1.20299	0.110472	1	16.2822	13.5384
ENSMUSG00000043535	Setx	senataxin [Source:MGI Symbol;Acc:MGI:2443480]	2	1.18626	0.110493	1	7.45366	8.84243
ENSMUSG00000031711	Zfp330	zinc finger protein 330 [Source:MGI Symbol;Acc:MGI:1353574]	8	-1.33902	0.110526	1	3.89267	2.90447
ENSMUSG00000024370	Cdc23	CDC23 cell division cycle 23 [Source:MGI Symbol;Acc:MGI:1098815]	18	1.22876	0.110544	1	3.61417	4.44028
ENSMUSG00000026779	Mastl	microtubule associated serine/threonine kinase-like [Source:MGI Symbol;Acc:MGI:1914371]	2	1.67825	0.110735	1	0.445859	0.749413
ENSMUSG00000094870	Zfp131	zinc finger protein 131 [Source:MGI Symbol;Acc:MGI:1919715]	13	-1.2493	0.110819	1	7.81531	6.25981
ENSMUSG00000037465	Klf10	Kruppel-like factor 10 [Source:MGI Symbol;Acc:MGI:1101353]	15	1.73404	0.110859	1	5.44902	9.45031
ENSMUSG00000031357	Syap1	synapse associated protein 1 [Source:MGI Symbol;Acc:MGI:1914293]	X	-1.23602	0.110874	1	13.7822	11.1514
ENSMUSG00000090919	Pabpc4l	poly(A) binding protein, cytoplasmic 4-like [Source:MGI Symbol;Acc:MGI:3643087]	3	-1.77885	0.110937	1	0.675917	0.37923
ENSMUSG00000067825	Pex26	peroxisomal biogenesis factor 26 [Source:MGI Symbol;Acc:MGI:1921293]	6	1.42971	0.110944	1	1.35389	1.93874
ENSMUSG00000025026	Add3	adducin 3 (gamma) [Source:MGI Symbol;Acc:MGI:1351615]	19	1.22911	0.110974	1	24.1298	29.6543
ENSMUSG00000025403	Shmt2	serine hydroxymethyltransferase 2 (mitochondrial) [Source:MGI Symbol;Acc:MGI:1277989]	10	1.19887	0.111219	1	24.8224	29.7643
ENSMUSG00000022885	St6gal1	beta galactoside alpha 2,6 sialyltransferase 1 [Source:MGI Symbol;Acc:MGI:108470]	16	1.658	0.111221	1	1.48302	2.4571
ENSMUSG00000108741	Gm44553	predicted gene 44553 [Source:MGI Symbol;Acc:MGI:5753129]	7	-1.93503	0.111348	1	1.89493	0.979826
ENSMUSG00000032902	Slc16a1	solute carrier family 16 (monocarboxylic acid transporters), member 1 [Source:MGI Symbol;Acc:MGI:106013]	3	1.33969	0.111411	1	5.49974	7.36442
ENSMUSG00000031647	Mfap3l	microfibrillar-associated protein 3-like [Source:MGI Symbol;Acc:MGI:1918556]	8	-1.18687	0.111658	1	10.0398	8.46024
ENSMUSG00000047181	Samd14	sterile alpha motif domain containing 14 [Source:MGI Symbol;Acc:MGI:2384945]	11	1.20104	0.111851	1	24.6876	29.6423
ENSMUSG00000020694	Tlk2	tousled-like kinase 2 (Arabidopsis) [Source:MGI Symbol;Acc:MGI:1346023]	11	-1.19225	0.111881	1	9.62427	8.07156
ENSMUSG00000008763	Man1a2	mannosidase, alpha, class 1A, member 2 [Source:MGI Symbol;Acc:MGI:104676]	3	1.20082	0.112049	1	7.03672	8.44815
ENSMUSG00000052305	Hbb-bs	hemoglobin, beta adult s chain [Source:MGI Symbol;Acc:MGI:5474852]	7	4.82878	0.112058	1	3.70045	17.929
ENSMUSG00000073418	C4b	complement component 4B (Chido blood group) [Source:MGI Symbol;Acc:MGI:88228]	17	1.68787	0.112203	1	5.07173	8.55966
ENSMUSG00000024241	Sos1	SOS Ras/Rac guanine nucleotide exchange factor 1 [Source:MGI Symbol;Acc:MGI:98354]	17	1.2121	0.112362	1	4.99025	6.04825
ENSMUSG00000026452	Syt2	synaptotagmin II [Source:MGI Symbol;Acc:MGI:99666]	1	-2.16881	0.112458	1	0.24075	0.11025
ENSMUSG00000038301	Snx10	sorting nexin 10 [Source:MGI Symbol;Acc:MGI:1919232]	6	-1.42743	0.112493	1	1.58978	1.11305
ENSMUSG00000004508	Gab2	growth factor receptor bound protein 2-associated protein 2 [Source:MGI Symbol;Acc:MGI:1333854]	7	-1.23171	0.112508	1	7.8329	6.36089
ENSMUSG00000028434	Epb41l4b	erythrocyte membrane protein band 4.1 like 4b [Source:MGI Symbol;Acc:MGI:1859149]	4	1.26312	0.112841	1	2.93788	3.70987
ENSMUSG00000061607	Mdc1	mediator of DNA damage checkpoint 1 [Source:MGI Symbol;Acc:MGI:3525201]	17	1.23186	0.112844	1	4.80732	5.92245
ENSMUSG00000047143	Dmrta2	doublesex and mab-3 related transcription factor like family A2 [Source:MGI Symbol;Acc:MGI:2653629]	4	1.19004	0.112905	1	21.8071	25.9608
ENSMUSG00000047767	Atg16l2	autophagy related 16-like 2 (S. cerevisiae) [Source:MGI Symbol;Acc:MGI:1920933]	7	-1.44075	0.11306	1	1.68514	1.16966
ENSMUSG00000079157	Fam155a	family with sequence similarity 155, member A [Source:MGI Symbol;Acc:MGI:2142765]	8	-2.13029	0.113343	1	0.309526	0.14299
ENSMUSG00000034863	Ano8	anoctamin 8 [Source:MGI Symbol;Acc:MGI:2687327]	8	1.47564	0.11337	1	1.11645	1.6495
ENSMUSG00000055026	Gabrg3	gamma-aminobutyric acid (GABA) A receptor, subunit gamma 3 [Source:MGI Symbol;Acc:MGI:95624]	7	-1.24833	0.11338	1	6.0018	4.80988
ENSMUSG00000019838	Slc16a10	solute carrier family 16 (monocarboxylic acid transporters), member 10 [Source:MGI Symbol;Acc:MGI:1919722]	10	2.47417	0.113407	1	0.143061	0.354701
ENSMUSG00000068551	Zfp467	zinc finger protein 467 [Source:MGI Symbol;Acc:MGI:1916160]	6	1.36996	0.113488	1	3.11216	4.26218
ENSMUSG00000066894	Vsig10	V-set and immunoglobulin domain containing 10 [Source:MGI Symbol;Acc:MGI:2448533]	5	-1.51397	0.113757	1	3.72986	2.46379
ENSMUSG00000000600	Krit1	KRIT1, ankyrin repeat containing [Source:MGI Symbol;Acc:MGI:1930618]	5	-1.25142	0.113786	1	1.79537	1.43453
ENSMUSG00000058454	Dhcr7	7-dehydrocholesterol reductase [Source:MGI Symbol;Acc:MGI:1298378]	7	1.3728	0.113898	1	2.33462	3.20302
ENSMUSG00000029452	Tmem116	transmembrane protein 116 [Source:MGI Symbol;Acc:MGI:1924712]	5	-1.94039	0.113966	1	0.690709	0.35187
ENSMUSG00000107610	D530018E20Rik	RIKEN cDNA D530018E20 gene [Source:MGI Symbol;Acc:MGI:1926117]	6	-2.29735	0.11403	1	1.65532	0.71617
ENSMUSG00000037035	Inhbb	inhibin beta-B [Source:MGI Symbol;Acc:MGI:96571]	1	1.44778	0.114044	1	2.45601	3.55608
ENSMUSG00000073755	5730409E04Rik	RIKEN cDNA 5730409E04Rik gene [Source:MGI Symbol;Acc:MGI:3609248]	4	1.28176	0.114106	1	6.18971	7.93308
ENSMUSG00000092094	Zfp804b	zinc finger protein 804B [Source:MGI Symbol;Acc:MGI:2685287]	5	1.89557	0.114177	1	0.414266	0.784799
ENSMUSG00000025945	Crygf	crystallin, gamma F [Source:MGI Symbol;Acc:MGI:88526]	1	3.00104	0.114199	1	1.97466	5.96389
ENSMUSG00000019795	Pcmt1	protein-L-isoaspartate (D-aspartate) O-methyltransferase 1 [Source:MGI Symbol;Acc:MGI:97502]	10	-1.22255	0.114278	1	12.1136	9.91015
ENSMUSG00000020142	Slc1a4	solute carrier family 1 (glutamate/neutral amino acid transporter), member 4 [Source:MGI Symbol;Acc:MGI:2135601]	11	-1.41295	0.114283	1	12.4753	8.82927
ENSMUSG00000047658	Gal3st3	galactose-3-O-sulfotransferase 3 [Source:MGI Symbol;Acc:MGI:3617843]	19	1.85121	0.114311	1	1.0431	1.93196
ENSMUSG00000034324	Tmem132c	transmembrane protein 132C [Source:MGI Symbol;Acc:MGI:2443061]	5	2.52944	0.114349	1	0.997381	2.52468
ENSMUSG00000087331	1810021B22Rik	RIKEN cDNA 1810021B22 gene [Source:MGI Symbol;Acc:MGI:1916370]	15	2.44843	0.114589	1	1.23756	3.03483
ENSMUSG00000106749	Gm43281	predicted gene 43281 [Source:MGI Symbol;Acc:MGI:5663418]	5	-1.89502	0.114622	1	1.10541	0.58072
ENSMUSG00000049409	Prokr1	prokineticin receptor 1 [Source:MGI Symbol;Acc:MGI:1929676]	6	1.53318	0.11472	1	2.62094	4.01635
ENSMUSG00000023919	Cenpq	centromere protein Q [Source:MGI Symbol;Acc:MGI:1933744]	17	-1.50295	0.114833	1	3.2756	2.1736
ENSMUSG00000020696	Rffl	ring finger and FYVE like domain containing protein [Source:MGI Symbol;Acc:MGI:1914588]	11	-1.26666	0.114899	1	4.09045	3.22877
ENSMUSG00000022037	Clu	clusterin [Source:MGI Symbol;Acc:MGI:88423]	14	1.20975	0.115049	1	1261.92	1526.6
ENSMUSG00000026509	Capn2	calpain 2 [Source:MGI Symbol;Acc:MGI:88264]	1	-1.18769	0.11513	1	37.496	31.5738
ENSMUSG00000030768	Disp1	dispatched RND transporter family member 1 [Source:MGI Symbol;Acc:MGI:1916147]	1	1.28164	0.115177	1	3.70198	4.74483
ENSMUSG00000026380	Tfcp2l1	transcription factor CP2-like 1 [Source:MGI Symbol;Acc:MGI:2444691]	1	-1.41083	0.115257	1	1.68355	1.19423
ENSMUSG00000022765	Snap29	synaptosomal-associated protein 29 [Source:MGI Symbol;Acc:MGI:1914724]	16	1.3068	0.115258	1	6.41807	8.37782
ENSMUSG00000117505	Gm9993	predicted gene 9993 [Source:MGI Symbol;Acc:MGI:3641793]	18	-2.35353	0.115428	1	1.84914	0.776404
ENSMUSG00000041995	Zbed3	zinc finger, BED type containing 3 [Source:MGI Symbol;Acc:MGI:1919364]	13	1.37994	0.115535	1	7.05709	9.73576
ENSMUSG00000021681	Aggf1	angiogenic factor with G patch and FHA domains 1 [Source:MGI Symbol;Acc:MGI:1913799]	13	1.2134	0.115564	1	13.7973	16.7401
ENSMUSG00000022742	Cpox	coproporphyrinogen oxidase [Source:MGI Symbol;Acc:MGI:104841]	16	1.68385	0.115765	1	0.614046	1.03346
ENSMUSG00000038884	Shfl	shiftless antiviral inhibitor of ribosomal frameshifting [Source:MGI Symbol;Acc:MGI:2441788]	9	1.75215	0.115921	1	1.3329	2.33269
ENSMUSG00000017314	Mpp2	membrane protein, palmitoylated 2 (MAGUK p55 subfamily member 2) [Source:MGI Symbol;Acc:MGI:1858257]	11	-1.31851	0.116029	1	6.73598	5.10588
ENSMUSG00000020100	Slc29a3	solute carrier family 29 (nucleoside transporters), member 3 [Source:MGI Symbol;Acc:MGI:1918529]	10	1.32509	0.116127	1	2.11417	2.80385
ENSMUSG00000022100	Xpo7	exportin 7 [Source:MGI Symbol;Acc:MGI:1929705]	14	-1.18445	0.116457	1	4.49445	3.79455
ENSMUSG00000102533	Gm37226	predicted gene, 37226 [Source:MGI Symbol;Acc:MGI:5610454]	9	-2.11464	0.116567	1	0.953486	0.450145
ENSMUSG00000071649	B3gat3	beta-1,3-glucuronyltransferase 3 (glucuronosyltransferase I) [Source:MGI Symbol;Acc:MGI:1919977]	19	1.21909	0.116677	1	12.7766	15.5767
ENSMUSG00000069274	H4c6	H4 clustered histone 6 [Source:MGI Symbol;Acc:MGI:2448425]	13	2.00338	0.116689	1	2.56877	5.17802
ENSMUSG00000028766	Alpl	alkaline phosphatase, liver/bone/kidney [Source:MGI Symbol;Acc:MGI:87983]	4	1.40669	0.116704	1	4.42501	6.2224
ENSMUSG00000063550	Nup98	nucleoporin 98 [Source:MGI Symbol;Acc:MGI:109404]	7	-1.23163	0.116738	1	6.91262	5.61447
ENSMUSG00000041592	Sdk2	sidekick cell adhesion molecule 2 [Source:MGI Symbol;Acc:MGI:2443847]	11	1.18616	0.116896	1	6.4462	7.64577
ENSMUSG00000004947	Dtx2	deltex 2, E3 ubiquitin ligase [Source:MGI Symbol;Acc:MGI:1921448]	5	-1.31422	0.116912	1	2.51424	1.91399
ENSMUSG00000064380	Gm26448	predicted gene, 26448 [Source:MGI Symbol;Acc:MGI:5456225]	9	1.99475	0.117039	1	8.54212	17.0496
ENSMUSG00000038729	Pakap	paralemmin A kinase anchor protein [Source:MGI Symbol;Acc:MGI:5141924]	4	-2.19251	0.117136	1	0.614478	0.279887
ENSMUSG00000031060	Rbm10	RNA binding motif protein 10 [Source:MGI Symbol;Acc:MGI:2384310]	X	1.29625	0.117282	1	8.47102	10.9851
ENSMUSG00000035268	Pkig	protein kinase inhibitor, gamma [Source:MGI Symbol;Acc:MGI:1343086]	2	1.25467	0.117377	1	6.3357	7.9532
ENSMUSG00000019659	Ccdc12	coiled-coil domain containing 12 [Source:MGI Symbol;Acc:MGI:1919904]	9	1.37601	0.117505	1	3.44456	4.74215
ENSMUSG00000107278	Gm42600	predicted gene 42600 [Source:MGI Symbol;Acc:MGI:5662737]	6	-2.81764	0.117557	1	0.388825	0.136222
ENSMUSG00000070803	Cited4	Cbp/p300-interacting transactivator, with Glu/Asp-rich carboxy-terminal domain, 4 [Source:MGI Symbol;Acc:MGI:1861694]	4	1.72064	0.117577	1	2.09743	3.60666
ENSMUSG00000040209	Zfp704	zinc finger protein 704 [Source:MGI Symbol;Acc:MGI:2180715]	3	-1.19231	0.117648	1	6.47986	5.43512
ENSMUSG00000020844	Nxn	nucleoredoxin [Source:MGI Symbol;Acc:MGI:109331]	11	1.19255	0.117897	1	48.6598	58.0315
ENSMUSG00000015451	C4a	complement component 4A (Rodgers blood group) [Source:MGI Symbol;Acc:MGI:98320]	17	-2.13159	0.117948	1	0.201955	0.0942189
ENSMUSG00000057506	Bloc1s2	biogenesis of lysosomal organelles complex-1, subunit 2 [Source:MGI Symbol;Acc:MGI:1920939]	19	-1.44251	0.118109	1	7.36196	5.10474
ENSMUSG00000062563	Cys1	cystin 1 [Source:MGI Symbol;Acc:MGI:2177632]	12	1.33042	0.11818	1	4.37463	5.81707
ENSMUSG00000054648	Zfp869	zinc finger protein 869 [Source:MGI Symbol;Acc:MGI:1914119]	8	-1.2334	0.1182	1	4.99842	4.05415
ENSMUSG00000061898	Rbak	RB-associated KRAB zinc finger [Source:MGI Symbol;Acc:MGI:1927369]	5	-1.5856	0.118224	1	2.90349	1.83237
ENSMUSG00000034940	Synrg	synergin, gamma [Source:MGI Symbol;Acc:MGI:1354742]	11	1.2013	0.118238	1	5.99438	7.20012
ENSMUSG00000024143	Rhoq	ras homolog family member Q [Source:MGI Symbol;Acc:MGI:1931553]	17	-1.19224	0.11841	1	16.9892	14.2477
ENSMUSG00000024544	Ldlrad4	low density lipoprotein receptor class A domain containing 4 [Source:MGI Symbol;Acc:MGI:1277150]	18	1.19294	0.118629	1	9.28557	11.0788
ENSMUSG00000021068	Nin	ninein [Source:MGI Symbol;Acc:MGI:105108]	12	1.18661	0.118635	1	3.27045	3.88023
ENSMUSG00000026991	Pkp4	plakophilin 4 [Source:MGI Symbol;Acc:MGI:109281]	2	1.23363	0.11872	1	43.8758	54.1248
ENSMUSG00000061887	Ssbp3	single-stranded DNA binding protein 3 [Source:MGI Symbol;Acc:MGI:1919725]	4	1.20602	0.118752	1	9.21181	11.1087
ENSMUSG00000039156	Stim2	stromal interaction molecule 2 [Source:MGI Symbol;Acc:MGI:2151156]	5	-1.31086	0.118781	1	6.40909	4.89079
ENSMUSG00000039501	Znfx1	zinc finger, NFX1-type containing 1 [Source:MGI Symbol;Acc:MGI:2138982]	2	1.27161	0.1188	1	5.11379	6.50199
ENSMUSG00000064945	Rny3	RNA, Y3 small cytoplasmic (associated with Ro protein) [Source:MGI Symbol;Acc:MGI:107304]	6	1.82185	0.118993	1	17.6021	32.0933
ENSMUSG00000031391	L1cam	L1 cell adhesion molecule [Source:MGI Symbol;Acc:MGI:96721]	X	-1.63209	0.119023	1	0.648063	0.396929
ENSMUSG00000028901	Gmeb1	glucocorticoid modulatory element binding protein 1 [Source:MGI Symbol;Acc:MGI:2135604]	4	-1.28235	0.119087	1	3.07591	2.39934
ENSMUSG00000042804	Gpr153	G protein-coupled receptor 153 [Source:MGI Symbol;Acc:MGI:1916157]	4	1.27295	0.119119	1	5.04285	6.41567
ENSMUSG00000020459	Mtif2	mitochondrial translational initiation factor 2 [Source:MGI Symbol;Acc:MGI:1924034]	11	1.32871	0.119128	1	3.99999	5.31769
ENSMUSG00000021962	Dcp1a	decapping mRNA 1A [Source:MGI Symbol;Acc:MGI:1923151]	14	-1.25374	0.119144	1	4.79517	3.82604
ENSMUSG00000019803	Nr2e1	nuclear receptor subfamily 2, group E, member 1 [Source:MGI Symbol;Acc:MGI:1100526]	10	3.62296	0.119166	1	0.162371	0.594291
ENSMUSG00000030087	Klf15	Kruppel-like factor 15 [Source:MGI Symbol;Acc:MGI:1929988]	6	1.38022	0.119384	1	9.37731	12.9376
ENSMUSG00000003865	Gys1	glycogen synthase 1, muscle [Source:MGI Symbol;Acc:MGI:101805]	7	1.45574	0.119444	1	1.8749	2.72813
ENSMUSG00000071451	Psmg4	proteasome (prosome, macropain) assembly chaperone 4 [Source:MGI Symbol;Acc:MGI:1916916]	13	1.35872	0.119474	1	19.4817	26.4545
ENSMUSG00000104936	2610011E03Rik	RIKEN cDNA 2610011E03 gene [Source:MGI Symbol;Acc:MGI:1919710]	5	-1.85659	0.119507	1	1.44854	0.778047
ENSMUSG00000026623	Lpgat1	lysophosphatidylglycerol acyltransferase 1 [Source:MGI Symbol;Acc:MGI:2446186]	1	1.20138	0.119529	1	8.03188	9.64619
ENSMUSG00000091476	Catspere2	cation channel sperm associated auxiliary subunit epsilon 2 [Source:MGI Symbol;Acc:MGI:5589632]	1	-1.65868	0.11956	1	1.00198	0.604307
ENSMUSG00000052456	Get3	guided entry of tail-anchored proteins factor 3, ATPase [Source:MGI Symbol;Acc:MGI:1928379]	8	-1.21584	0.119617	1	23.7072	19.4922
ENSMUSG00000025427	Rnf165	ring finger protein 165 [Source:MGI Symbol;Acc:MGI:2444521]	18	-1.24215	0.119662	1	5.67271	4.56779
ENSMUSG00000021716	Srek1ip1	splicing regulatory glutamine/lysine-rich protein 1interacting protein 1 [Source:MGI Symbol;Acc:MGI:1914538]	13	1.33162	0.119689	1	5.61421	7.47455
ENSMUSG00000028651	Ppie	peptidylprolyl isomerase E (cyclophilin E) [Source:MGI Symbol;Acc:MGI:1917118]	4	-1.39289	0.11972	1	6.94478	4.98953
ENSMUSG00000051278	Zgrf1	zinc finger, GRF-type containing 1 [Source:MGI Symbol;Acc:MGI:1918893]	3	-1.61849	0.119973	1	0.891619	0.550676
ENSMUSG00000026956	Uap1l1	UDP-N-acteylglucosamine pyrophosphorylase 1-like 1 [Source:MGI Symbol;Acc:MGI:2443318]	2	-1.42756	0.120146	1	2.91648	2.04104
ENSMUSG00000022676	Snai2	snail family zinc finger 2 [Source:MGI Symbol;Acc:MGI:1096393]	16	-2.13313	0.120171	1	0.79763	0.372782
ENSMUSG00000018217	Pmp22	peripheral myelin protein 22 [Source:MGI Symbol;Acc:MGI:97631]	11	-1.19975	0.120421	1	149.486	124.601
ENSMUSG00000017721	Pigt	phosphatidylinositol glycan anchor biosynthesis, class T [Source:MGI Symbol;Acc:MGI:1926178]	2	1.17216	0.120526	1	20.5237	24.0566
ENSMUSG00000030306	Tmtc1	transmembrane and tetratricopeptide repeat containing 1 [Source:MGI Symbol;Acc:MGI:3039590]	6	2.20287	0.120571	1	2.036	4.48583
ENSMUSG00000004864	Mapk13	mitogen-activated protein kinase 13 [Source:MGI Symbol;Acc:MGI:1346864]	17	2.55607	0.12071	1	0.263863	0.677307
ENSMUSG00000000532	Acvr1b	activin A receptor, type 1B [Source:MGI Symbol;Acc:MGI:1338944]	15	1.19154	0.120722	1	11.5593	13.7781
ENSMUSG00000061461	Smim20	small integral membrane protein 20 [Source:MGI Symbol;Acc:MGI:1913528]	5	-1.37703	0.120769	1	5.42882	3.94594
ENSMUSG00000022378	Cyrib	CYFIP related Rac1 interactor B [Source:MGI Symbol;Acc:MGI:1923520]	15	-1.18624	0.120772	1	7.32373	6.17577
ENSMUSG00000038648	Creb3l2	cAMP responsive element binding protein 3-like 2 [Source:MGI Symbol;Acc:MGI:2442695]	6	1.18067	0.120812	1	15.1612	17.8985
ENSMUSG00000022661	Cd200	CD200 antigen [Source:MGI Symbol;Acc:MGI:1196990]	16	1.84644	0.120852	1	0.378563	0.700829
ENSMUSG00000070372	Capza1	capping protein (actin filament) muscle Z-line, alpha 1 [Source:MGI Symbol;Acc:MGI:106227]	3	-1.283	0.120856	1	8.25816	6.43749
ENSMUSG00000062382	Ftl1-ps1	ferritin light polypeptide 1, pseudogene 1 [Source:MGI Symbol;Acc:MGI:3779109]	13	1.54658	0.120858	1	3.98682	6.16653
ENSMUSG00000031608	Galnt7	polypeptide N-acetylgalactosaminyltransferase 7 [Source:MGI Symbol;Acc:MGI:1349449]	8	1.30021	0.120949	1	3.09338	4.02083
ENSMUSG00000047909	Ankrd16	ankyrin repeat domain 16 [Source:MGI Symbol;Acc:MGI:2444796]	2	-1.49395	0.120951	1	3.48629	2.33402
ENSMUSG00000026737	Pip4k2a	phosphatidylinositol-5-phosphate 4-kinase, type II, alpha [Source:MGI Symbol;Acc:MGI:1298206]	2	1.41021	0.121017	1	2.12011	2.9942
ENSMUSG00000026933	Camsap1	calmodulin regulated spectrin-associated protein 1 [Source:MGI Symbol;Acc:MGI:3036242]	2	-1.18012	0.121223	1	17.119	14.5088
ENSMUSG00000015474	Ppt2	palmitoyl-protein thioesterase 2 [Source:MGI Symbol;Acc:MGI:1860075]	17	1.93069	0.121301	1	0.551471	1.07143
ENSMUSG00000062866	Phactr2	phosphatase and actin regulator 2 [Source:MGI Symbol;Acc:MGI:2446138]	10	1.21157	0.121375	1	6.99352	8.47111
ENSMUSG00000019997	Ccn2	cellular communication network factor 2 [Source:MGI Symbol;Acc:MGI:95537]	10	1.25929	0.121458	1	73.7855	92.9179
ENSMUSG00000033361	Prrg3	proline rich Gla (G-carboxyglutamic acid) 3 (transmembrane) [Source:MGI Symbol;Acc:MGI:2685214]	X	1.4316	0.12146	1	2.37001	3.38998
ENSMUSG00000032534	Cep63	centrosomal protein 63 [Source:MGI Symbol;Acc:MGI:2158560]	9	-1.21764	0.121462	1	6.41726	5.27013
ENSMUSG00000037536	Fbxo34	F-box protein 34 [Source:MGI Symbol;Acc:MGI:1926188]	14	-1.2721	0.121492	1	7.88263	6.19914
ENSMUSG00000020812	Snhg16	small nucleolar RNA host gene 16 [Source:MGI Symbol;Acc:MGI:1913543]	11	-1.61893	0.121507	1	2.59128	1.60325
ENSMUSG00000002147	Stat6	signal transducer and activator of transcription 6 [Source:MGI Symbol;Acc:MGI:103034]	10	1.49599	0.121608	1	1.54839	2.31581
ENSMUSG00000018433	Nol11	nucleolar protein 11 [Source:MGI Symbol;Acc:MGI:1916229]	11	-1.27402	0.122052	1	4.20375	3.29843
ENSMUSG00000036078	Sigmar1	sigma non-opioid intracellular receptor 1 [Source:MGI Symbol;Acc:MGI:1195268]	4	1.44111	0.122114	1	2.25657	3.24963
ENSMUSG00000072969	Armcx5	armadillo repeat containing, X-linked 5 [Source:MGI Symbol;Acc:MGI:2148026]	X	-1.35522	0.122118	1	3.49517	2.57883
ENSMUSG00000028199	Cryz	crystallin, zeta [Source:MGI Symbol;Acc:MGI:88527]	3	1.35034	0.122172	1	1.85919	2.51333
ENSMUSG00000026626	Ppp2r5a	protein phosphatase 2, regulatory subunit B', alpha [Source:MGI Symbol;Acc:MGI:2388479]	1	1.21761	0.12225	1	4.39343	5.34668
ENSMUSG00000047414	Flrt2	fibronectin leucine rich transmembrane protein 2 [Source:MGI Symbol;Acc:MGI:3603594]	12	-1.36881	0.122601	1	28.6333	20.919
ENSMUSG00000026483	Niban1	niban apoptosis regulator 1 [Source:MGI Symbol;Acc:MGI:2137237]	1	1.92958	0.122605	1	13.3083	25.6795
ENSMUSG00000049755	Zfp672	zinc finger protein 672 [Source:MGI Symbol;Acc:MGI:2442105]	11	-1.3854	0.122821	1	2.23227	1.61209
ENSMUSG00000024077	Strn	striatin, calmodulin binding protein [Source:MGI Symbol;Acc:MGI:1333757]	17	-1.16828	0.122937	1	12.7593	10.9231
ENSMUSG00000001313	Rnd2	Rho family GTPase 2 [Source:MGI Symbol;Acc:MGI:1338755]	11	-1.63278	0.122971	1	5.5061	3.37131
ENSMUSG00000039682	Lap3	leucine aminopeptidase 3 [Source:MGI Symbol;Acc:MGI:1914238]	5	-1.24028	0.12299	1	11.0832	8.93426
ENSMUSG00000036896	C1qc	complement component 1, q subcomponent, C chain [Source:MGI Symbol;Acc:MGI:88225]	4	2.90326	0.123039	1	0.859581	2.50373
ENSMUSG00000005373	Mlxipl	MLX interacting protein-like [Source:MGI Symbol;Acc:MGI:1927999]	5	2.19146	0.123044	1	0.260479	0.573993
ENSMUSG00000043518	Rai2	retinoic acid induced 2 [Source:MGI Symbol;Acc:MGI:1344378]	X	1.97113	0.123118	1	0.539644	1.06617
ENSMUSG00000041891	Lman1	lectin, mannose-binding, 1 [Source:MGI Symbol;Acc:MGI:1917611]	18	1.19522	0.12317	1	9.55733	11.4222
ENSMUSG00000027405	Nop56	NOP56 ribonucleoprotein [Source:MGI Symbol;Acc:MGI:1914384]	2	-1.21162	0.12319	1	9.94818	8.20732
ENSMUSG00000036334	Igsf10	immunoglobulin superfamily, member 10 [Source:MGI Symbol;Acc:MGI:1923481]	3	-1.26125	0.1233	1	3.91756	3.1068
ENSMUSG00000063884	Ptcd3	pentatricopeptide repeat domain 3 [Source:MGI Symbol;Acc:MGI:1917206]	6	-1.25733	0.123329	1	4.4903	3.57324
ENSMUSG00000020067	Mypn	myopalladin [Source:MGI Symbol;Acc:MGI:1916052]	10	-1.3034	0.123415	1	12.7704	9.79945
ENSMUSG00000026849	Tor1a	torsin family 1, member A (torsin A) [Source:MGI Symbol;Acc:MGI:1353568]	2	1.31461	0.123445	1	7.68708	10.1159
ENSMUSG00000047832	Cdca4	cell division cycle associated 4 [Source:MGI Symbol;Acc:MGI:1919213]	12	-1.52931	0.123481	1	1.63514	1.07041
ENSMUSG00000036339	Tmem260	transmembrane protein 260 [Source:MGI Symbol;Acc:MGI:2443219]	14	1.2571	0.123522	1	1.59086	1.99964
ENSMUSG00000035314	Gdpd5	glycerophosphodiester phosphodiesterase domain containing 5 [Source:MGI Symbol;Acc:MGI:2686926]	7	1.23511	0.123597	1	4.65096	5.74574
ENSMUSG00000052684	Jun	jun proto-oncogene [Source:MGI Symbol;Acc:MGI:96646]	4	1.67019	0.123629	1	99.5339	166.241
ENSMUSG00000102642	A130048G24Rik	RIKEN cDNA A130048G24 gene [Source:MGI Symbol;Acc:MGI:2443520]	1	-1.96728	0.123637	1	1.27935	0.649378
ENSMUSG00000007570	Fance	Fanconi anemia, complementation group E [Source:MGI Symbol;Acc:MGI:1920025]	17	-1.51442	0.123707	1	2.79132	1.83861
ENSMUSG00000036052	Dnajb5	DnaJ heat shock protein family (Hsp40) member B5 [Source:MGI Symbol;Acc:MGI:1930018]	4	-1.25931	0.12378	1	4.20384	3.33941
ENSMUSG00000030513	Pcsk6	proprotein convertase subtilisin/kexin type 6 [Source:MGI Symbol;Acc:MGI:102897]	7	1.88177	0.12386	1	0.280053	0.528559
ENSMUSG00000031482	Slc25a15	solute carrier family 25 (mitochondrial carrier ornithine transporter), member 15 [Source:MGI Symbol;Acc:MGI:1342274]	8	1.49703	0.123907	1	0.844186	1.2657
ENSMUSG00000103049	Gm37311	predicted gene, 37311 [Source:MGI Symbol;Acc:MGI:5610539]	16	-1.92298	0.123935	1	1.35261	0.700951
ENSMUSG00000028047	Thbs3	thrombospondin 3 [Source:MGI Symbol;Acc:MGI:98739]	3	-1.95882	0.124005	1	0.667397	0.340906
ENSMUSG00000029861	Fam131b	family with sequence similarity 131, member B [Source:MGI Symbol;Acc:MGI:1923406]	6	1.61191	0.124103	1	0.971075	1.56521
ENSMUSG00000035051	Dhx57	DEAH (Asp-Glu-Ala-Asp/His) box polypeptide 57 [Source:MGI Symbol;Acc:MGI:2147067]	17	-1.37173	0.124142	1	3.04761	2.2212
ENSMUSG00000004568	Arhgef18	rho/rac guanine nucleotide exchange factor (GEF) 18 [Source:MGI Symbol;Acc:MGI:2142567]	8	1.1974	0.12421	1	4.44054	5.31539
ENSMUSG00000025507	Pidd1	p53 induced death domain protein 1 [Source:MGI Symbol;Acc:MGI:1889507]	7	2.03553	0.124431	1	0.364863	0.743011
ENSMUSG00000029499	Pxmp2	peroxisomal membrane protein 2 [Source:MGI Symbol;Acc:MGI:107487]	5	1.7033	0.12457	1	2.73052	4.65517
ENSMUSG00000026383	Epb41l5	erythrocyte membrane protein band 4.1 like 5 [Source:MGI Symbol;Acc:MGI:103006]	1	-1.22914	0.124584	1	2.18121	1.77442
ENSMUSG00000014355	Anapc1	anaphase promoting complex subunit 1 [Source:MGI Symbol;Acc:MGI:103097]	2	-1.17235	0.124613	1	9.2345	7.87619
ENSMUSG00000110710	C78859	expressed sequence C78859 [Source:MGI Symbol;Acc:MGI:2142856]	8	-2.23437	0.124696	1	0.76851	0.343062
ENSMUSG00000038539	Atf5	activating transcription factor 5 [Source:MGI Symbol;Acc:MGI:2141857]	7	1.41135	0.12474	1	5.76626	8.14333
ENSMUSG00000105472	Gm43024	predicted gene 43024 [Source:MGI Symbol;Acc:MGI:5663161]	3	-3.61134	0.124866	1	0.309684	0.0822773
ENSMUSG00000060601	Nr1h2	nuclear receptor subfamily 1, group H, member 2 [Source:MGI Symbol;Acc:MGI:1352463]	7	1.20053	0.125005	1	14.4124	17.3072
ENSMUSG00000035596	Mboat7	membrane bound O-acyltransferase domain containing 7 [Source:MGI Symbol;Acc:MGI:1924832]	7	1.22704	0.125212	1	3.08628	3.78691
ENSMUSG00000029512	Ulk1	unc-51 like kinase 1 [Source:MGI Symbol;Acc:MGI:1270126]	5	1.19333	0.125344	1	8.0228	9.57445
ENSMUSG00000021464	Ror2	receptor tyrosine kinase-like orphan receptor 2 [Source:MGI Symbol;Acc:MGI:1347521]	13	2.40824	0.125363	1	0.26996	0.654076
ENSMUSG00000039910	Cited2	Cbp/p300-interacting transactivator, with Glu/Asp-rich carboxy-terminal domain, 2 [Source:MGI Symbol;Acc:MGI:1306784]	10	-1.21296	0.125376	1	22.4722	18.5318
ENSMUSG00000002104	Rapsn	receptor-associated protein of the synapse [Source:MGI Symbol;Acc:MGI:99422]	2	1.33068	0.12541	1	7.86191	10.4652
ENSMUSG00000113864	Gm48381	predicted gene, 48381 [Source:MGI Symbol;Acc:MGI:6097859]	12	1.78654	0.125414	1	0.420603	0.751885
ENSMUSG00000113642	Gm49329	predicted gene, 49329 [Source:MGI Symbol;Acc:MGI:6121514]	12	2.01526	0.125425	1	0.878732	1.78564
ENSMUSG00000008475	Arpc5	actin related protein 2/3 complex, subunit 5 [Source:MGI Symbol;Acc:MGI:1915021]	1	1.24042	0.125454	1	20.4942	25.4184
ENSMUSG00000034731	Dgkh	diacylglycerol kinase, eta [Source:MGI Symbol;Acc:MGI:2444188]	14	1.46926	0.125462	1	0.450004	0.662078
ENSMUSG00000013275	Slc41a1	solute carrier family 41, member 1 [Source:MGI Symbol;Acc:MGI:2444823]	1	1.274	0.125499	1	19.2405	24.51
ENSMUSG00000040649	Rimklb	ribosomal modification protein rimK-like family member B [Source:MGI Symbol;Acc:MGI:1918325]	6	1.24904	0.12564	1	4.29242	5.36035
ENSMUSG00000047759	Hs3st3a1	heparan sulfate (glucosamine) 3-O-sulfotransferase 3A1 [Source:MGI Symbol;Acc:MGI:1333861]	11	-2.06306	0.125752	1	0.697449	0.336794
ENSMUSG00000013936	Myl2	myosin, light polypeptide 2, regulatory, cardiac, slow [Source:MGI Symbol;Acc:MGI:97272]	5	1.66803	0.125851	1	1.63376	2.72822
ENSMUSG00000109719	Gm45266	predicted gene 45266 [Source:MGI Symbol;Acc:MGI:5791102]	8	-2.51404	0.125971	1	1.12853	0.445964
ENSMUSG00000020134	Peli1	pellino 1 [Source:MGI Symbol;Acc:MGI:1914495]	11	-1.19785	0.12608	1	8.29112	6.92202
ENSMUSG00000030469	Zfp719	zinc finger protein 719 [Source:MGI Symbol;Acc:MGI:2444708]	7	-1.40553	0.126169	1	2.23652	1.59031
ENSMUSG00000036908	Unc93b1	unc-93 homolog B1, TLR signaling regulator [Source:MGI Symbol;Acc:MGI:1859307]	19	1.76629	0.126211	1	0.857532	1.5138
ENSMUSG00000041961	Znrf3	zinc and ring finger 3 [Source:MGI Symbol;Acc:MGI:3039616]	11	1.18265	0.126236	1	8.69978	10.2907
ENSMUSG00000041120	Nbl1	NBL1, DAN family BMP antagonist [Source:MGI Symbol;Acc:MGI:104591]	4	1.2019	0.126286	1	55.4367	66.6282
ENSMUSG00000037921	Ddx60	DExD/H box helicase 60 [Source:MGI Symbol;Acc:MGI:2384570]	8	1.49272	0.126288	1	1.03915	1.55146
ENSMUSG00000014592	Camta1	calmodulin binding transcription activator 1 [Source:MGI Symbol;Acc:MGI:2140230]	4	-1.29853	0.12631	1	1.95594	1.50586
ENSMUSG00000042046	Dstyk	dual serine/threonine and tyrosine protein kinase [Source:MGI Symbol;Acc:MGI:1925064]	1	1.2259	0.126312	1	5.43678	6.66605
ENSMUSG00000005615	Pcyt1a	phosphate cytidylyltransferase 1, choline, alpha isoform [Source:MGI Symbol;Acc:MGI:88557]	16	-1.21999	0.126438	1	7.91233	6.48752
ENSMUSG00000047260	Emc6	ER membrane protein complex subunit 6 [Source:MGI Symbol;Acc:MGI:1913298]	11	1.27015	0.126676	1	12.2606	15.5834
ENSMUSG00000031853	Map3k21	mitogen-activated protein kinase kinase kinase 21 [Source:MGI Symbol;Acc:MGI:2385307]	8	1.26058	0.126807	1	4.97721	6.2773
ENSMUSG00000008200	Fnbp4	formin binding protein 4 [Source:MGI Symbol;Acc:MGI:1860513]	2	-1.18002	0.126866	1	12.4761	10.5711
ENSMUSG00000024835	Coro1b	coronin, actin binding protein 1B [Source:MGI Symbol;Acc:MGI:1345963]	19	-1.22656	0.127137	1	11.5843	9.43876
ENSMUSG00000033569	Adgrb3	adhesion G protein-coupled receptor B3 [Source:MGI Symbol;Acc:MGI:2441837]	1	-1.68407	0.127144	1	0.274443	0.162151
ENSMUSG00000037020	Wdr62	WD repeat domain 62 [Source:MGI Symbol;Acc:MGI:1923696]	7	-1.48743	0.127284	1	1.44892	0.972904
ENSMUSG00000022529	Zfp263	zinc finger protein 263 [Source:MGI Symbol;Acc:MGI:1921370]	16	-1.30991	0.12733	1	5.31916	4.063
ENSMUSG00000032621	Srek1	splicing regulatory glutamine/lysine-rich protein 1 [Source:MGI Symbol;Acc:MGI:2145245]	13	-1.28604	0.127483	1	10.474	8.14581
ENSMUSG00000039781	Cep131	centrosomal protein 131 [Source:MGI Symbol;Acc:MGI:107440]	11	1.30833	0.127597	1	4.02049	5.26179
ENSMUSG00000022184	Fbxo4	F-box protein 4 [Source:MGI Symbol;Acc:MGI:2146220]	15	1.4772	0.127606	1	2.67191	3.9549
ENSMUSG00000026482	Rgl1	ral guanine nucleotide dissociation stimulator,-like 1 [Source:MGI Symbol;Acc:MGI:107484]	1	1.17866	0.127624	1	8.79538	10.3662
ENSMUSG00000036246	Gmip	Gem-interacting protein [Source:MGI Symbol;Acc:MGI:1926066]	8	-1.63906	0.127636	1	1.13262	0.692486
ENSMUSG00000057054	Inca1	inhibitor of CDK, cyclin A1 interacting protein 1 [Source:MGI Symbol;Acc:MGI:2144284]	11	-1.8488	0.1279	1	1.64719	0.88631
ENSMUSG00000030199	Etv6	ets variant 6 [Source:MGI Symbol;Acc:MGI:109336]	6	-1.19315	0.127933	1	15.6208	13.0972
ENSMUSG00000044072	Eml6	echinoderm microtubule associated protein like 6 [Source:MGI Symbol;Acc:MGI:2442895]	11	1.31466	0.128019	1	1.52648	2.00746
ENSMUSG00000032469	Dbr1	debranching RNA lariats 1 [Source:MGI Symbol;Acc:MGI:1931520]	9	-1.51573	0.128061	1	3.37161	2.22267
ENSMUSG00000027584	Oprl1	opioid receptor-like 1 [Source:MGI Symbol;Acc:MGI:97440]	2	-2.28047	0.12814	1	0.397764	0.172799
ENSMUSG00000022844	Pdia5	protein disulfide isomerase associated 5 [Source:MGI Symbol;Acc:MGI:1919849]	16	1.39589	0.128197	1	3.56045	4.96374
ENSMUSG00000031691	Tnpo2	transportin 2 (importin 3, karyopherin beta 2b) [Source:MGI Symbol;Acc:MGI:2384849]	8	-1.17197	0.12836	1	12.8151	10.9355
ENSMUSG00000056904	Gm5620	predicted gene 5620 [Source:MGI Symbol;Acc:MGI:3647798]	9	1.78373	0.128371	1	1.49041	2.65793
ENSMUSG00000104279	Gm38300	predicted gene, 38300 [Source:MGI Symbol;Acc:MGI:5611528]	1	1.75478	0.128433	1	0.874456	1.53709
ENSMUSG00000109588	Lnp1	leukemia NUP98 fusion partner 1 [Source:MGI Symbol;Acc:MGI:5011982]	16	-1.711	0.128542	1	9.82611	5.74374
ENSMUSG00000016520	Lnx2	ligand of numb-protein X 2 [Source:MGI Symbol;Acc:MGI:2155959]	5	1.19142	0.128572	1	14.1769	16.8982
ENSMUSG00000031627	Irf2	interferon regulatory factor 2 [Source:MGI Symbol;Acc:MGI:96591]	8	1.24501	0.128652	1	2.84032	3.53587
ENSMUSG00000020277	Pfkl	phosphofructokinase, liver, B-type [Source:MGI Symbol;Acc:MGI:97547]	10	1.20076	0.128669	1	17.6227	21.1618
ENSMUSG00000011831	Evi5	ecotropic viral integration site 5 [Source:MGI Symbol;Acc:MGI:104736]	5	-1.17294	0.128726	1	13.9777	11.9136
ENSMUSG00000044712	Slc38a6	solute carrier family 38, member 6 [Source:MGI Symbol;Acc:MGI:3648156]	12	-1.78297	0.128776	1	0.920227	0.515704
ENSMUSG00000031209	Heph	hephaestin [Source:MGI Symbol;Acc:MGI:1332240]	X	1.21363	0.128827	1	9.03474	10.9644
ENSMUSG00000021820	Camk2g	calcium/calmodulin-dependent protein kinase II gamma [Source:MGI Symbol;Acc:MGI:88259]	14	-1.21483	0.12887	1	12.5482	10.3247
ENSMUSG00000078970	Wdr92	WD repeat domain 92 [Source:MGI Symbol;Acc:MGI:2144224]	11	1.6015	0.129014	1	1.24556	2.0001
ENSMUSG00000024012	Mtch1	mitochondrial carrier 1 [Source:MGI Symbol;Acc:MGI:1929261]	17	1.17748	0.129117	1	17.1569	20.2023
ENSMUSG00000004994	Ccdc130	coiled-coil domain containing 130 [Source:MGI Symbol;Acc:MGI:1914986]	8	1.52197	0.129187	1	2.08987	3.18475
ENSMUSG00000055333	Fat2	FAT atypical cadherin 2 [Source:MGI Symbol;Acc:MGI:2685369]	11	3.87599	0.129244	1	0.0286667	0.112922
ENSMUSG00000037846	Rtkn2	rhotekin 2 [Source:MGI Symbol;Acc:MGI:2158417]	10	2.18324	0.129305	1	0.153612	0.337736
ENSMUSG00000050666	Vstm4	V-set and transmembrane domain containing 4 [Source:MGI Symbol;Acc:MGI:2444633]	14	1.34093	0.129364	1	5.2503	7.04179
ENSMUSG00000026177	Slc11a1	solute carrier family 11 (proton-coupled divalent metal ion transporters), member 1 [Source:MGI Symbol;Acc:MGI:1345275]	1	2.61024	0.129659	1	0.18897	0.495369
ENSMUSG00000033379	Atp6v0b	ATPase, H+ transporting, lysosomal V0 subunit B [Source:MGI Symbol;Acc:MGI:1890510]	4	-1.29635	0.129686	1	9.56461	7.37535
ENSMUSG00000031486	Adgra2	adhesion G protein-coupled receptor A2 [Source:MGI Symbol;Acc:MGI:1925810]	8	1.80813	0.129735	1	4.91501	8.88716
ENSMUSG00000005575	Ube2m	ubiquitin-conjugating enzyme E2M [Source:MGI Symbol;Acc:MGI:108278]	7	-1.24277	0.129803	1	21.8814	17.604
ENSMUSG00000023367	Tmem176a	transmembrane protein 176A [Source:MGI Symbol;Acc:MGI:1913308]	6	1.23543	0.129803	1	6.9184	8.5499
ENSMUSG00000044937	Ttc41	tetratricopeptide repeat domain 41 [Source:MGI Symbol;Acc:MGI:2387653]	10	-1.74933	0.129837	1	0.67275	0.384703
ENSMUSG00000050989	Selenon	selenoprotein N [Source:MGI Symbol;Acc:MGI:2151208]	4	1.23347	0.130036	1	9.98554	12.3094
ENSMUSG00000020272	Stk10	serine/threonine kinase 10 [Source:MGI Symbol;Acc:MGI:1099439]	11	1.21088	0.130046	1	8.52141	10.3228
ENSMUSG00000006567	Atp7b	ATPase, Cu++ transporting, beta polypeptide [Source:MGI Symbol;Acc:MGI:103297]	8	1.68353	0.130062	1	0.550773	0.92652
ENSMUSG00000020911	Krt19	keratin 19 [Source:MGI Symbol;Acc:MGI:96693]	11	1.22954	0.130065	1	30.3513	37.3203
ENSMUSG00000020184	Mdm2	transformed mouse 3T3 cell double minute 2 [Source:MGI Symbol;Acc:MGI:96952]	10	-1.20283	0.130075	1	10.698	8.89753
ENSMUSG00000042429	Adora1	adenosine A1 receptor [Source:MGI Symbol;Acc:MGI:99401]	1	1.9429	0.130089	1	2.7018	5.24969
ENSMUSG00000023156	Rpp14	ribonuclease P 14 subunit [Source:MGI Symbol;Acc:MGI:1914303]	14	1.4451	0.130319	1	3.39461	4.91413
ENSMUSG00000021288	Klc1	kinesin light chain 1 [Source:MGI Symbol;Acc:MGI:107978]	12	-1.17407	0.13039	1	36.2415	30.869
ENSMUSG00000031483	Erlin2	ER lipid raft associated 2 [Source:MGI Symbol;Acc:MGI:2387215]	8	1.16418	0.130456	1	16.6778	19.4138
ENSMUSG00000023456	Tpi1	triosephosphate isomerase 1 [Source:MGI Symbol;Acc:MGI:98797]	6	1.21614	0.130494	1	38.0927	46.3305
ENSMUSG00000111131	9930024M15Rik	RIKEN cDNA 9930024M15 gene [Source:MGI Symbol;Acc:MGI:3026920]	10	-1.96725	0.130766	1	1.08158	0.547637
ENSMUSG00000028360	Slc44a5	solute carrier family 44, member 5 [Source:MGI Symbol;Acc:MGI:3035141]	3	1.91215	0.130792	1	0.24709	0.474231
ENSMUSG00000116165	Pdxp	pyridoxal (pyridoxine, vitamin B6) phosphatase [Source:MGI Symbol;Acc:MGI:1919282]	15	1.86857	0.130867	1	0.962564	1.80234
ENSMUSG00000040966	Slc22a2	solute carrier family 22 (organic cation transporter), member 2 [Source:MGI Symbol;Acc:MGI:1335072]	17	2.03612	0.130955	1	0.380976	0.777744
ENSMUSG00000021595	Nsun2	NOL1/NOP2/Sun domain family member 2 [Source:MGI Symbol;Acc:MGI:107252]	13	-1.19488	0.13123	1	16.0647	13.4438
ENSMUSG00000034160	Ogt	O-linked N-acetylglucosamine (GlcNAc) transferase (UDP-N-acetylglucosamine:polypeptide-N-acetylglucosaminyl transferase) [Source:MGI Symbol;Acc:MGI:1339639]	X	-1.33284	0.131458	1	25.5654	19.1823
ENSMUSG00000027248	Pdia3	protein disulfide isomerase associated 3 [Source:MGI Symbol;Acc:MGI:95834]	2	1.17626	0.131704	1	85.9151	101.057
ENSMUSG00000065353	Snora73b	small nucleolar RNA, H/ACA box 73b [Source:MGI Symbol;Acc:MGI:4360049]	4	1.95389	0.132012	1	7.74562	15.1302
ENSMUSG00000026064	Ptp4a1	protein tyrosine phosphatase 4a1 [Source:MGI Symbol;Acc:MGI:1277096]	1	-1.83121	0.13216	1	0.403522	0.218755
ENSMUSG00000072258	Taf1a	TATA-box binding protein associated factor, RNA polymerase I, A [Source:MGI Symbol;Acc:MGI:109578]	1	-1.51061	0.132168	1	3.98832	2.6444
ENSMUSG00000097752	Gm26688	predicted gene, 26688 [Source:MGI Symbol;Acc:MGI:5477182]	13	-1.46441	0.132234	1	5.66473	3.85705
ENSMUSG00000024795	Kif20b	kinesin family member 20B [Source:MGI Symbol;Acc:MGI:2444576]	19	1.65377	0.132274	1	0.385622	0.639376
ENSMUSG00000000340	Dbt	dihydrolipoamide branched chain transacylase E2 [Source:MGI Symbol;Acc:MGI:105386]	3	1.32241	0.132593	1	3.77143	4.98938
ENSMUSG00000048486	Fitm2	fat storage-inducing transmembrane protein 2 [Source:MGI Symbol;Acc:MGI:2444508]	2	1.36059	0.132652	1	3.00978	4.09252
ENSMUSG00000044244	Il20rb	interleukin 20 receptor beta [Source:MGI Symbol;Acc:MGI:2143266]	9	-1.67419	0.132757	1	0.835386	0.498367
ENSMUSG00000109394	A230057D06Rik	RIKEN cDNA A230057D06 gene [Source:MGI Symbol;Acc:MGI:2442922]	7	-1.54442	0.132846	1	0.689384	0.447254
ENSMUSG00000051007	Gatd1	glutamine amidotransferase like class 1 domain containing 1 [Source:MGI Symbol;Acc:MGI:2387178]	7	1.48329	0.132849	1	1.46602	2.17229
ENSMUSG00000030257	Srgap3	SLIT-ROBO Rho GTPase activating protein 3 [Source:MGI Symbol;Acc:MGI:2152938]	6	1.40175	0.132863	1	3.03119	4.24713
ENSMUSG00000041073	Nacad	NAC alpha domain containing [Source:MGI Symbol;Acc:MGI:3603030]	11	-1.54479	0.132954	1	1.67968	1.08445
ENSMUSG00000065118	Gm23297	predicted gene, 23297 [Source:MGI Symbol;Acc:MGI:5453074]	7	-2.74228	0.133044	1	14.2019	5.14245
ENSMUSG00000023809	Rps6ka2	ribosomal protein S6 kinase, polypeptide 2 [Source:MGI Symbol;Acc:MGI:1342290]	17	-1.17047	0.133053	1	7.42922	6.34729
ENSMUSG00000033207	Mamdc2	MAM domain containing 2 [Source:MGI Symbol;Acc:MGI:1918988]	19	-1.60358	0.133209	1	1.88219	1.17188
ENSMUSG00000029250	Polr2b	polymerase (RNA) II (DNA directed) polypeptide B [Source:MGI Symbol;Acc:MGI:2388280]	5	1.18244	0.133265	1	14.1408	16.7206
ENSMUSG00000003316	Glg1	golgi apparatus protein 1 [Source:MGI Symbol;Acc:MGI:104967]	8	1.17205	0.133374	1	34.2839	40.1823
ENSMUSG00000042426	Dhx29	DEAH (Asp-Glu-Ala-His) box polypeptide 29 [Source:MGI Symbol;Acc:MGI:2145374]	13	-1.19497	0.1334	1	8.00702	6.69765
ENSMUSG00000029535	Triap1	TP53 regulated inhibitor of apoptosis 1 [Source:MGI Symbol;Acc:MGI:1916326]	5	1.52701	0.133492	1	3.81683	5.8251
ENSMUSG00000103348	Gm37053	predicted gene, 37053 [Source:MGI Symbol;Acc:MGI:5610281]	1	-2.84389	0.133495	1	0.644397	0.226022
ENSMUSG00000082315	Gm16523	predicted gene, 16523 [Source:MGI Symbol;Acc:MGI:4360990]	2	-2.03443	0.133585	1	0.347575	0.170186
ENSMUSG00000040848	Sft2d2	SFT2 domain containing 2 [Source:MGI Symbol;Acc:MGI:1917362]	1	1.17429	0.133625	1	12.8754	15.1156
ENSMUSG00000039531	Zup1	zinc finger containing ubiquitin peptidase 1 [Source:MGI Symbol;Acc:MGI:1919830]	10	-1.37705	0.133654	1	2.87589	2.0891
ENSMUSG00000011158	Brf1	BRF1, RNA polymerase III transcription initiation factor 90 kDa subunit [Source:MGI Symbol;Acc:MGI:1919558]	12	-1.17254	0.13377	1	10.3987	8.86586
ENSMUSG00000040711	Sh3pxd2b	SH3 and PX domains 2B [Source:MGI Symbol;Acc:MGI:2442062]	11	1.19439	0.133845	1	4.82442	5.76455
ENSMUSG00000048148	Nwd1	NACHT and WD repeat domain containing 1 [Source:MGI Symbol;Acc:MGI:2442268]	8	1.64032	0.133902	1	0.667862	1.09552
ENSMUSG00000026675	Hsd17b7	hydroxysteroid (17-beta) dehydrogenase 7 [Source:MGI Symbol;Acc:MGI:1330808]	1	1.24391	0.13396	1	5.25316	6.53591
ENSMUSG00000037974	Muc5ac	mucin 5, subtypes A and C, tracheobronchial/gastric [Source:MGI Symbol;Acc:MGI:104697]	7	-2.72032	0.133968	1	0.207879	0.0751995
ENSMUSG00000039671	Zmynd8	zinc finger, MYND-type containing 8 [Source:MGI Symbol;Acc:MGI:1918025]	2	1.19693	0.134096	1	9.23228	11.0483
ENSMUSG00000024085	Man2a1	mannosidase 2, alpha 1 [Source:MGI Symbol;Acc:MGI:104669]	17	1.35363	0.134196	1	1.4176	1.92146
ENSMUSG00000117406	Ntn3	netrin 3 [Source:MGI Symbol;Acc:MGI:1341188]	17	1.68221	0.134225	1	0.393174	0.66237
ENSMUSG00000036155	Mgat5	mannoside acetylglucosaminyltransferase 5 [Source:MGI Symbol;Acc:MGI:894701]	1	1.18579	0.134244	1	6.44451	7.64206
ENSMUSG00000020420	Zfp607a	zinc finger protein 607A [Source:MGI Symbol;Acc:MGI:3584526]	7	-1.70635	0.134268	1	1.01488	0.595291
ENSMUSG00000020914	Top2a	topoisomerase (DNA) II alpha [Source:MGI Symbol;Acc:MGI:98790]	11	1.2992	0.134286	1	2.22065	2.88468
ENSMUSG00000032939	Nup93	nucleoporin 93 [Source:MGI Symbol;Acc:MGI:1919055]	8	-1.22792	0.134342	1	12.2251	9.95955
ENSMUSG00000085584	Rtl9	retrotransposon Gag like 9 [Source:MGI Symbol;Acc:MGI:2685231]	X	-1.95507	0.134431	1	0.584906	0.297496
ENSMUSG00000059742	Kcnh7	potassium voltage-gated channel, subfamily H (eag-related), member 7 [Source:MGI Symbol;Acc:MGI:2159566]	2	-2.01248	0.134475	1	0.11845	0.0580623
ENSMUSG00000022972	Cfap298	cilia and flagella associate protien 298 [Source:MGI Symbol;Acc:MGI:1915251]	16	-1.29833	0.134489	1	13.4185	10.3452
ENSMUSG00000113869	Gm48869	predicted gene, 48869 [Source:MGI Symbol;Acc:MGI:6098615]	13	-2.03232	0.134503	1	1.80641	0.883267
ENSMUSG00000035164	Zc3h12c	zinc finger CCCH type containing 12C [Source:MGI Symbol;Acc:MGI:3026959]	9	-1.2144	0.134516	1	8.09595	6.66463
ENSMUSG00000103976	Gm37677	predicted gene, 37677 [Source:MGI Symbol;Acc:MGI:5610905]	1	-1.94884	0.134528	1	0.396391	0.203
ENSMUSG00000053898	Ech1	enoyl coenzyme A hydratase 1, peroxisomal [Source:MGI Symbol;Acc:MGI:1858208]	7	-1.23706	0.134879	1	12.3034	9.93879
ENSMUSG00000041187	Prkd2	protein kinase D2 [Source:MGI Symbol;Acc:MGI:2141917]	7	1.53936	0.134946	1	1.12509	1.73343
ENSMUSG00000049907	Rasl11b	RAS-like, family 11, member B [Source:MGI Symbol;Acc:MGI:1916189]	5	-1.245	0.135096	1	21.2232	17.0547
ENSMUSG00000057143	Trim12c	tripartite motif-containing 12C [Source:MGI Symbol;Acc:MGI:4821183]	7	1.44913	0.135179	1	2.11964	3.07381
ENSMUSG00000051444	Bbs12	Bardet-Biedl syndrome 12 (human) [Source:MGI Symbol;Acc:MGI:2686651]	3	-2.11204	0.135217	1	1.27165	0.598233
ENSMUSG00000105395	Gm42672	predicted gene 42672 [Source:MGI Symbol;Acc:MGI:5662809]	3	-2.33491	0.135263	1	5.81466	2.47709
ENSMUSG00000058761	Rnf169	ring finger protein 169 [Source:MGI Symbol;Acc:MGI:1920257]	7	-1.27006	0.135344	1	7.61807	5.99801
ENSMUSG00000102931	Gm38114	predicted gene, 38114 [Source:MGI Symbol;Acc:MGI:5611342]	6	-2.5401	0.135501	1	1.03931	0.409857
ENSMUSG00000099492	Gm5525	predicted gene 5525 [Source:MGI Symbol;Acc:MGI:3646042]	1	-1.97368	0.13559	1	1.31836	0.664314
[truncated: 12,713 more rows]

## Sheet: Statistically Significant
gene_id	SYMBOL	DESCRIPTION	SEQNAME	Fold_Change	PValue	FDR	WT_0H_Avg_FPKM	FB_0H_Avg_FPKM
[truncated: 43 more rows]

## Sheet: Biologically Significant
gene_id	SYMBOL	DESCRIPTION	SEQNAME	Fold_Change	PValue	FDR	WT_0H_Avg_FPKM	FB_0H_Avg_FPKM
[truncated: 25 more rows]
