# Supplementary material for: The Immediate Early Response of Lens Epithelial Cells to Lens Injury
Source: Cells. 2022 Nov 1;11(21):3456. doi: 10.3390/cells11213456 (PMC9654717; doi:10.3390/cells11213456)
Supplement: Supplementary file 1 [file cells-11-03456-s001.zip › Supplemental Table S7.xlsx]

## Sheet: Data Description
	Analysis Overview
	This spreadsheet is part of a study investingating the transcriptomic consequences of the conditional deletion of either Egr1 or FosB on the lens epithelial cell injury response. It sumarizes the results of a pairwise contrast between FosB null mouse lens epithelial cells (FB_6H) and wildtype LEC (WT_6H) profiled at six hours after mechanical injury. Positive fold changes indicate increased expre…
	Worksheet Specification
	Worksheet	Description
	Data Description	Describes each worksheet, provides analysis overview and define column headers for data sheets
	Raw_Counts	Counts associated with all Ensembl 104 GTF features for all samples included in this contrast
	All Present Genes	All genes measured in this experiment
	Statistically Significant	All gene differentially expressed with an absolute fold change > 2 and an FDR less than 0.05
	Biologically Significant	All genes meeting criteria for biologically significant differential expression
	Biological Significance Criteria used to identify statistically and biologically significant genes Jiang J, Shihan MH, Wang Y, Duncan MK. Invest Ophthalmol Vis Sci. 2018;59(12):4986-4997. Manthey AL, Terrell AM, Lachke SA, Polson SW, Duncan MK. Genom Data. 2014;2:369-374.
	Criterion			Implementation
	Statistical significance			filter( abs(logFC) > 1 and FDR < 0.05)
	"a change in mRNA level greater than 2 FPKM"			abs(average(FPKM-Condition1) - average(FPKM-Condition2) ) > 2
	"expression level in either condition is 2 FPKM or greater"			abs(average(FPKM-Condition1)) > 2 OR abs(average(FPKM-Condition1) > 2
	FosB Null LEC vs Wildtype LEC 6 hours post injury
	criteria	Total	Up	Down
	Statistically Significant	874	724	150
	Biologically Significant	589	485	104
	Column Header Specification: Raw_Counts
	1 (A)	gene_id		the ensembl id of this feature
	2 (B)	SYMBOL		The symbol of the gene associated with this feature
	3 (C)	DESCRIPTION		The long-form, descriptive name of this gene from Ensembl v104
	4 (D)	SEQNAME		The name of the squence (Chromosome or contig) where this gene is located
	5 (E)	eu_length		The exon-union length of this genomic feature
	6 (F)	eu_gc		The fractional GC content of this feature
	7 (F) through 12 (K)	Sample Labels (WT_6H_1 through FB_6H_3)		Count observed for this feature in the indicated sample
	Column Header Specification: All Present Genes, Statistically Significant, Biologically Significant
	Column number (Workbook Letter)	Header		Description
	1 (A)	gene_id		the ensembl id of this feature
	2 (B)	SYMBOL		The symbol of the gene associated with this feature
	3 (C)	DESCRIPTION		The long-form, descriptive name of this gene from Ensembl v104
	4 (D)	SEQNAME		The name of the squence (Chromosome or contig) where this gene is located
	5 (E)	Fold_Change		The fold change of this gene between FB_6H and WT_6H in Lens Epithelium
	6 (F)	p_value		P_Value calculated by edgeR (FB_6H vs WT_6H)
	7 (G)	FDR		Adjusted p value reported by edgeR (FB_6H vs WT_6H)
	8 (H)	WT_6H_Avg_FPKM		Abundance of this gene (Average FPKM) observed in WT_6H
	9 (I)	FB_6H_Avg_FPKM		Abundance of this gene (Average FPKM) observed in FB_6H
	Red points indicate genes with zero counts in one group

## Sheet: Raw_Counts
gene_id	SYMBOL	DESCRIPTION	SEQNAME	eu_length	eu_gc	WT_6H_1	WT_6H_2	WT_6H_3	FB_6H_1	FB_6H_2	FB_6H_3
ENSMUSG00002074905			10	69	0.681159	0	0	0	0	0	0
ENSMUSG00002076002			17	110	0.545455	0	0	0	0	0	1
ENSMUSG00002075266			12	75	0.413333	0	0	0	0	0	0
ENSMUSG00002076008			11	145	0.62069	0	0	0	0	0	0
ENSMUSG00002074908			2	110	0.627273	0	0	3	0	0	1
ENSMUSG00002074899			GL456372.1	121	0.479339	0	0	0	0	0	0
ENSMUSG00002074901			1	141	0.432624	0	0	0	0	0	0
ENSMUSG00002075999			3	100	0.47	0	0	0	0	0	0
ENSMUSG00002074903			14	76	0.486842	0	0	0	0	0	0
ENSMUSG00002074904			2	140	0.6	5	0	0	0	0	0
ENSMUSG00002075282			X	93	0.44086	1	0	0	0	0	0
ENSMUSG00002074910			1	102	0.5	0	0	0	0	0	0
ENSMUSG00002076364			X	71	0.338028	0	0	0	0	0	0
ENSMUSG00002074921			16	96	0.416667	0	0	0	0	0	0
ENSMUSG00002074922			7	460	0.46087	1	0	0	1	0	4
ENSMUSG00000095475			JH584299.1	1446	0.482711	0	0	0	0	0	0
ENSMUSG00002074928			X	205	0.614634	3	0	0	3	1	0
ENSMUSG00002075293			3	110	0.518182	0	0	0	0	0	0
ENSMUSG00002076006			7	76	0.447368	0	8	0	3	3	0
ENSMUSG00002074931			2	131	0.51145	0	0	0	0	0	0
ENSMUSG00002074919			Y	110	0.609091	0	0	0	0	0	0
ENSMUSG00002074920			2	96	0.614583	0	0	0	0	0	0
ENSMUSG00002074917			4	72	0.597222	0	0	0	0	0	0
ENSMUSG00002074935			2	136	0.507353	8	13	15	29	3	9
ENSMUSG00002076029			17	76	0.5	1	0	0	0	0	0
ENSMUSG00002074924			6	102	0.343137	0	0	0	0	0	0
ENSMUSG00002074934			2	93	0.505376	0	0	0	0	0	0
ENSMUSG00002075290			13	150	0.6	0	0	0	0	0	0
ENSMUSG00002074940			19	104	0.413462	0	0	0	0	0	0
ENSMUSG00002074941			11	56	0.875	4	0	0	0	0	0
ENSMUSG00002074942			5	142	0.65493	0	0	0	0	0	0
ENSMUSG00002074943			2	124	0.435484	0	1	0	0	0	0
ENSMUSG00002076037			7	79	0.43038	0	0	0	0	0	0
ENSMUSG00002076038			18	119	0.546218	0	0	0	0	0	0
ENSMUSG00002074946			15	74	0.540541	0	0	0	0	0	0
ENSMUSG00002074947			7	120	0.55	0	0	0	0	0	0
ENSMUSG00002074948			14	110	0.627273	0	0	0	0	0	0
ENSMUSG00002075313			16	110	0.618182	0	0	0	1	0	0
ENSMUSG00002076043			1	442	0.255656	0	0	0	0	0	0
ENSMUSG00000047383		novel transcript	1	878	0.383827	0	0	0	0	0	0
ENSMUSG00002076032			8	101	0.49505	0	0	0	0	0	0
ENSMUSG00002074953			14	93	0.344086	0	0	0	0	0	0
ENSMUSG00002075318			18	70	0.357143	0	0	0	0	0	0
ENSMUSG00002075319			3	110	0.572727	0	0	0	0	0	0
ENSMUSG00002076009			16	129	0.418605	0	0	0	0	0	0
ENSMUSG00000094172			JH584299.1	1446	0.472337	0	0	0	0	0	0
ENSMUSG00002075686			8	94	0.478723	0	0	0	0	0	0
ENSMUSG00002075323			2	101	0.386139	0	0	0	0	0	0
ENSMUSG00002076417			14	107	0.420561	0	0	0	0	0	0
ENSMUSG00002074961			6	137	0.59854	0	0	0	0	0	0
ENSMUSG00002074962			2	188	0.351064	0	1	3	0	1	1
ENSMUSG00002074923			7	108	0.453704	0	0	0	0	0	0
ENSMUSG00002076057			1	138	0.797101	0	0	0	0	0	0
ENSMUSG00002074912			1	96	0.416667	0	0	0	0	0	0
ENSMUSG00002076059			7	121	0.495868	0	0	0	0	0	0
ENSMUSG00002074927			7	92	0.423913	0	0	0	0	0	0
ENSMUSG00002076061			7	76	0.302632	0	0	0	0	0	0
ENSMUSG00002074969			19	56	0.732143	4	6	3	15	9	6
ENSMUSG00002074970			GL456385.1	101	0.50495	0	0	0	0	0	0
ENSMUSG00002074971			8	95	0.421053	0	0	0	0	0	0
ENSMUSG00002074932			12	97	0.536082	0	0	0	0	0	0
ENSMUSG00002074933			5	78	0.576923	0	0	0	0	0	0
ENSMUSG00002074974			Y	110	0.618182	0	0	0	0	0	0
ENSMUSG00002074975			19	82	0.560976	0	0	0	0	0	0
ENSMUSG00000106759		vomeronasal 2, receptor, pseudogene 28	5	744	0.409946	0	0	0	0	0	0
ENSMUSG00002074937			8	107	0.682243	0	0	1	0	0	0
ENSMUSG00002074938			9	77	0.584416	0	0	0	0	0	0
ENSMUSG00002074979			6	110	0.581818	0	0	0	0	4	0
ENSMUSG00002076073			1	89	0.449438	0	0	0	0	0	0
ENSMUSG00002074981			10	97	0.546392	0	0	0	0	0	0
ENSMUSG00002076075			2	127	0.385827	0	0	0	0	0	0
ENSMUSG00002074983			4	101	0.376238	0	0	0	0	0	0
ENSMUSG00002076077			5	46	0.5	0	0	0	0	0	0
ENSMUSG00002076078			19	66	0.318182	0	0	0	0	0	0
ENSMUSG00002074986			6	99	0.474747	0	0	0	0	0	0
ENSMUSG00002074987			10	77	0.350649	0	0	0	0	0	0
ENSMUSG00002076081			11	78	0.461538	0	0	0	0	0	0
ENSMUSG00002075353			16	121	0.487603	0	0	0	0	0	0
ENSMUSG00002074990			1	110	0.554545	2	0	0	0	0	0
ENSMUSG00002076084			17	193	0.440415	0	1	0	5	6	3
ENSMUSG00002076085			13	67	0.402985	0	0	0	0	0	0
ENSMUSG00002074993			17	84	0.52381	0	0	0	0	0	0
ENSMUSG00002074994			15	86	0.581395	0	0	0	0	0	0
ENSMUSG00002076088			X	85	0.388235	0	0	0	0	0	0
ENSMUSG00002074956			2	187	0.411765	0	0	0	0	0	0
ENSMUSG00002076090			16	151	0.463576	0	0	0	0	0	0
ENSMUSG00002076091			12	78	0.666667	0	0	0	0	0	0
ENSMUSG00002074999			4	125	0.592	0	0	0	0	0	0
ENSMUSG00002075000			12	79	0.56962	0	0	0	0	0	0
ENSMUSG00002075001			11	71	0.859155	0	0	0	0	0	0
ENSMUSG00002075366			13	94	0.574468	0	0	0	0	0	0
ENSMUSG00002074963			7	110	0.563636	0	0	0	1	0	0
ENSMUSG00002075004			1	126	0.571429	0	0	0	0	0	0
ENSMUSG00002076098			8	190	0.442105	0	0	0	0	0	0
ENSMUSG00002075006			7	121	0.495868	0	0	0	0	0	0
ENSMUSG00002076060			7	110	0.6	0	0	0	0	0	0
ENSMUSG00002075008			18	118	0.372881	0	0	1	0	0	0
ENSMUSG00002075009			3	76	0.434211	0	0	0	0	0	0
ENSMUSG00002075010			12	110	0.618182	0	0	0	0	0	0
ENSMUSG00002075011			15	126	0.555556	0	0	0	0	0	0
ENSMUSG00002075012			3	100	0.45	0	0	0	0	0	0
ENSMUSG00002076106			4	126	0.579365	0	0	0	0	0	0
ENSMUSG00002076107			1	70	0.557143	0	0	0	0	0	0
ENSMUSG00002076108			4	96	0.5625	0	0	0	0	0	0
ENSMUSG00002075016			18	63	0.761905	0	0	0	0	0	0
ENSMUSG00002075017			10	155	0.406452	0	0	0	1	0	0
ENSMUSG00002075018			13	119	0.420168	0	0	0	0	0	0
ENSMUSG00002075019			10	104	0.519231	0	0	0	0	0	0
ENSMUSG00002075020			7	101	0.49505	0	0	0	0	0	0
ENSMUSG00002075021			3	121	0.495868	0	0	0	0	0	0
ENSMUSG00002075022			X	56	0.446429	0	0	0	0	0	0
ENSMUSG00002075023			3	110	0.618182	0	0	0	0	0	0
ENSMUSG00002075024			2	78	0.551282	0	0	0	0	0	0
ENSMUSG00002075025			1	110	0.563636	0	0	0	0	0	0
ENSMUSG00002075026			11	77	0.558442	0	0	0	0	0	0
ENSMUSG00002075027			3	74	0.5	0	0	0	0	0	0
ENSMUSG00002075028			2	233	0.55794	0	0	0	0	0	0
ENSMUSG00002076122			6	77	0.506494	1	0	0	0	0	0
ENSMUSG00002075030			17	86	0.383721	1	3	3	0	1	2
ENSMUSG00002075031			2	103	0.359223	0	0	0	0	0	0
ENSMUSG00002076004			17	90	0.244444	2	2	3	2	2	0
ENSMUSG00002075033			2	126	0.579365	0	0	0	0	0	0
ENSMUSG00002075034			2	126	0.595238	0	0	0	0	0	0
ENSMUSG00002075035			7	208	0.331731	0	0	0	0	0	0
ENSMUSG00002075400			GL456239.1	98	0.44898	0	0	0	0	0	0
ENSMUSG00002076130			13	108	0.296296	0	0	0	1	0	0
ENSMUSG00002075038			7	107	0.682243	0	0	0	0	0	0
ENSMUSG00002075403			13	129	0.643411	0	0	0	0	0	0
ENSMUSG00002076133			X	69	0.434783	0	0	0	0	0	0
ENSMUSG00000119162			16	133	0.481203	0	0	0	0	0	0
ENSMUSG00000118636		EF-hand calcium binding domain 10 (EFCAB10) pseudogene	5	239	0.414226	0	0	0	0	0	0
ENSMUSG00002076136			2	91	0.296703	0	0	0	0	0	0
ENSMUSG00002076137			14	110	0.563636	0	0	0	0	0	0
ENSMUSG00002075045			13	138	0.637681	0	0	0	0	0	0
ENSMUSG00002075046			10	83	0.590361	0	0	0	0	0	0
ENSMUSG00002075047			3	129	0.612403	0	0	0	0	0	0
ENSMUSG00002075048			5	114	0.350877	0	0	0	0	0	0
ENSMUSG00002075049			16	110	0.572727	0	0	0	0	0	0
ENSMUSG00002075050			9	121	0.495868	0	0	0	0	0	0
ENSMUSG00002074930			5	361	0.584488	0	0	0	0	0	0
ENSMUSG00002075052			8	101	0.50495	3	0	1	0	0	0
ENSMUSG00000118648		cytochrome P450, family 2, subfamily b like pseudgene	7	60	0.516667	0	0	0	0	0	0
ENSMUSG00002075054			19	125	0.424	0	0	0	0	0	0
ENSMUSG00002075055			2	104	0.317308	0	0	0	1	0	0
ENSMUSG00002075420			14	85	0.317647	0	0	0	0	0	0
ENSMUSG00002075057			X	83	0.518072	0	0	0	0	0	0
ENSMUSG00002075058			12	123	0.463415	1	0	0	0	0	0
ENSMUSG00002075059			3	128	0.5	0	0	0	0	0	0
ENSMUSG00002075060			15	86	0.546512	0	0	0	0	0	0
ENSMUSG00002076154			17	126	0.579365	0	0	0	0	0	0
ENSMUSG00002075062			4	149	0.52349	0	0	0	0	0	0
ENSMUSG00002075063			17	110	0.554545	0	0	0	0	0	0
ENSMUSG00002076157			7	110	0.572727	0	0	0	0	0	1
ENSMUSG00002076158			7	119	0.336134	0	0	0	0	0	0
ENSMUSG00002075066			5	85	0.4	0	0	0	0	0	0
ENSMUSG00002076160			3	94	0.62766	0	0	7	0	0	4
ENSMUSG00002075068			8	98	0.612245	6	0	0	0	0	5
ENSMUSG00002075069			4	110	0.572727	0	0	0	0	0	0
ENSMUSG00000118666		Zinc finger protein 932 (Zfp932) pseudogene	13	1567	0.374601	0	0	0	0	0	0
ENSMUSG00002076164			5	109	0.302752	0	0	0	0	0	0
ENSMUSG00002074951			1	127	0.480315	0	0	0	0	0	0
ENSMUSG00002074952			12	101	0.386139	0	0	0	0	0	0
ENSMUSG00000118670		mucin 19	15	22800	0.594167	0	0	0	3	0	6
ENSMUSG00002075075			11	123	0.536585	24	2	4	7	16	11
ENSMUSG00002075076			1	106	0.528302	0	0	0	0	0	0
ENSMUSG00002075077			1	57	0.701754	0	0	0	0	0	0
ENSMUSG00002076171			4	126	0.571429	0	0	0	2	0	0
ENSMUSG00002075079			15	140	0.492857	0	0	0	0	0	0
ENSMUSG00002076173			16	57	0.736842	3517	3955	2380	1443	3825	5355
ENSMUSG00002075081			9	123	0.341463	0	0	0	0	0	0
ENSMUSG00002076903			8	86	0.348837	0	0	0	1	0	0
ENSMUSG00002075083			2	96	0.59375	0	0	0	0	0	0
ENSMUSG00002075084			4	106	0.462264	0	0	0	0	0	0
ENSMUSG00002075085			2	111	0.36036	0	0	0	1	0	0
ENSMUSG00002076179			1	72	0.361111	0	0	0	0	0	0
ENSMUSG00002075451			4	121	0.495868	0	0	0	0	0	0
ENSMUSG00002075452			17	94	0.287234	0	0	0	0	0	0
ENSMUSG00002075089			12	103	0.475728	0	2	0	1	0	5
ENSMUSG00002076183			6	104	0.298077	0	0	2	0	11	2
ENSMUSG00002076184			6	126	0.603175	2	0	2	3	0	0
ENSMUSG00002075092			16	121	0.495868	0	0	0	0	0	0
ENSMUSG00002074972			13	91	0.472527	0	0	0	0	0	0
ENSMUSG00002075094			X	81	0.407407	0	4	0	0	0	0
ENSMUSG00002075095			1	62	0.645161	0	0	0	0	0	0
ENSMUSG00002076189			1	164	0.347561	0	0	0	0	0	0
ENSMUSG00002076190			12	91	0.604396	0	0	0	0	0	0
ENSMUSG00002074977			18	106	0.103774	0	0	0	0	0	0
ENSMUSG00002074978			3	114	0.570175	0	0	0	0	0	0
ENSMUSG00002076193			11	127	0.559055	0	0	0	2	0	0
ENSMUSG00002075101			18	82	0.621951	0	0	0	0	0	0
ENSMUSG00002075102			6	354	0.485876	0	3	0	4	1	10
ENSMUSG00002075103			2	82	0.487805	0	0	0	3	0	0
ENSMUSG00002075104			13	127	0.637795	0	0	0	0	0	0
ENSMUSG00002075105			18	91	0.505495	0	0	0	0	0	0
ENSMUSG00002076199			2	122	0.672131	0	0	0	0	0	0
ENSMUSG00000118719			8	132	0.477273	0	0	0	0	0	0
ENSMUSG00002075108			8	102	0.5	0	0	0	0	0	0
ENSMUSG00002075109			2	143	0.636364	0	0	0	0	0	0
ENSMUSG00002076566			7	90	0.588889	0	0	0	0	0	0
ENSMUSG00002075111			7	90	0.433333	0	0	0	0	0	0
ENSMUSG00002075112			X	109	0.568807	0	0	0	0	0	0
ENSMUSG00002075113			13	138	0.666667	0	0	0	0	0	0
ENSMUSG00000118728			9	72	0.416667	0	0	0	0	0	0
ENSMUSG00002075115			2	125	0.576	0	0	0	0	0	0
ENSMUSG00002076209			4	121	0.495868	0	0	0	0	0	0
ENSMUSG00002076089			16	66	0.409091	0	0	0	0	0	0
ENSMUSG00002075118			12	78	0.525641	0	0	0	0	0	0
ENSMUSG00002075119			1	134	0.477612	0	0	0	0	0	0
ENSMUSG00002076213			12	112	0.455357	0	0	0	0	0	0
ENSMUSG00002076214			13	91	0.274725	0	0	0	0	0	0
ENSMUSG00002075122			10	109	0.623853	0	0	0	0	0	0
ENSMUSG00002075123			16	71	0.521127	0	0	0	0	0	0
ENSMUSG00002076096			X	110	0.381818	0	0	0	0	0	0
ENSMUSG00002075125			19	119	0.336134	0	0	0	0	0	3
ENSMUSG00002076219			5	122	0.442623	4	0	0	0	0	0
ENSMUSG00002075127			7	110	0.545455	0	0	0	2	1	0
ENSMUSG00002075128			8	122	0.590164	0	0	4	0	0	0
ENSMUSG00002075129			12	114	0.561404	0	0	0	0	0	0
ENSMUSG00002075130			X	123	0.471545	0	0	0	0	0	0
ENSMUSG00002075131			9	120	0.408333	0	0	0	0	0	0
ENSMUSG00002075132			8	140	0.485714	9	7	8	1	8	5
ENSMUSG00002075133			7	110	0.627273	0	0	0	0	0	0
ENSMUSG00002075134			7	96	0.53125	0	0	0	0	0	0
ENSMUSG00002076956			2	127	0.401575	0	0	0	0	0	0
ENSMUSG00002075136			18	111	0.45045	0	0	0	0	0	0
ENSMUSG00002076230			7	101	0.49505	0	0	0	0	0	0
ENSMUSG00002075138			10	94	0.521277	0	0	0	0	0	0
ENSMUSG00002076232			2	86	0.453488	0	0	0	0	0	0
ENSMUSG00002075140			2	108	0.388889	0	0	0	0	0	0
ENSMUSG00002075141			2	82	0.439024	1	1	8	1	1	3
ENSMUSG00002075506			8	79	0.43038	0	0	0	0	0	0
ENSMUSG00002075143			2	121	0.371901	0	0	0	0	0	0
ENSMUSG00002075144			16	70	0.6	0	0	0	0	0	0
ENSMUSG00002075145			10	109	0.477064	0	0	0	0	0	0
ENSMUSG00002076239			4	125	0.584	0	0	0	0	0	0
ENSMUSG00002076240			17	102	0.5	0	0	0	0	0	0
ENSMUSG00002075148			14	107	0.672897	0	0	0	0	0	0
ENSMUSG00000118778			17	88	0.443182	0	0	0	0	0	0
ENSMUSG00002075150			12	77	0.558442	0	0	0	0	0	0
ENSMUSG00002075151			9	184	0.61413	0	0	4	2	5	0
ENSMUSG00002075152			8	63	0.301587	0	0	0	0	0	0
ENSMUSG00002076125			2	125	0.592	0	0	0	0	0	0
ENSMUSG00002076247			10	99	0.393939	2	1	0	2	1	0
ENSMUSG00002075155			3	119	0.420168	0	0	0	0	0	0
ENSMUSG00000110493		olfactory receptor 841, pseudogene 1	9	848	0.376179	0	0	0	0	0	0
ENSMUSG00002075157			7	78	0.397436	0	0	4	0	0	0
ENSMUSG00002075158			14	126	0.587302	0	0	0	0	0	0
ENSMUSG00002075159			2	127	0.393701	0	0	11	0	0	0
ENSMUSG00002076253			1	83	0.373494	0	0	0	0	0	0
ENSMUSG00002075889			13	80	0.5	0	0	0	0	0	0
ENSMUSG00002075162			2	114	0.333333	0	0	0	0	0	0
ENSMUSG00002076256			X	124	0.403226	0	0	0	0	0	0
ENSMUSG00002075164			3	272	0.547794	0	0	0	0	0	0
ENSMUSG00002075165			1	98	0.479592	0	0	0	0	0	0
ENSMUSG00000118018		novel transcript	18	3704	0.37527	1	5	13	3	3	4
ENSMUSG00002076260			7	98	0.438776	5	1	0	4	1	1
ENSMUSG00002075168			6	62	0.419355	2	0	0	0	0	0
ENSMUSG00002075169			15	109	0.623853	0	0	0	0	0	0
ENSMUSG00002076263			2	126	0.579365	0	0	0	0	0	0
ENSMUSG00002075171			10	76	0.407895	0	0	0	3	0	0
ENSMUSG00002076144			2	121	0.421488	0	0	0	0	0	0
ENSMUSG00002075173			3	214	0.593458	0	0	0	0	0	0
ENSMUSG00002076267			X	86	0.395349	0	0	0	0	0	0
ENSMUSG00002076268			14	86	0.476744	0	7	0	1	1	0
ENSMUSG00002075176			10	126	0.571429	2	3	0	0	0	0
ENSMUSG00002075177			2	90	0.388889	0	0	0	0	0	0
ENSMUSG00002075178			2	127	0.393701	0	0	0	0	0	0
ENSMUSG00002076272			5	144	0.506944	0	0	0	0	0	0
ENSMUSG00002075180			3	141	0.64539	0	1	5	0	3	3
ENSMUSG00002076274			7	88	0.579545	1	0	0	0	0	0
ENSMUSG00002075182			13	107	0.570093	0	0	0	0	0	0
ENSMUSG00000111781		olfactory receptor 939, pseudogene 1	9	766	0.369452	0	0	0	0	0	0
ENSMUSG00002075184			13	110	0.554545	0	0	0	0	6	0
ENSMUSG00002075185			13	125	0.56	0	0	3	0	2	0
ENSMUSG00002075550			1	110	0.572727	0	0	0	8	0	0
ENSMUSG00002076280			1	89	0.325843	1	0	3	0	4	0
ENSMUSG00002075188			4	57	0.736842	0	0	0	0	0	0
ENSMUSG00002076282			X	126	0.579365	0	0	0	0	0	0
ENSMUSG00002075190			2	122	0.368852	0	0	0	0	0	0
ENSMUSG00002075191			8	175	0.445714	0	0	0	0	0	0
ENSMUSG00002075192			17	174	0.431034	0	0	0	0	0	0
ENSMUSG00002075072			8	125	0.536	0	0	0	0	0	0
ENSMUSG00002075073			17	121	0.495868	0	0	0	0	0	0
ENSMUSG00002075559			7	70	0.5	8	3	0	0	2	0
ENSMUSG00002075196			6	83	0.493976	0	0	0	0	0	0
ENSMUSG00002075197			9	123	0.373984	0	0	0	0	0	0
ENSMUSG00000116563		novel protein	2	180	0.455556	0	0	0	0	0	0
ENSMUSG00002075199			16	117	0.376068	0	0	0	0	0	0
ENSMUSG00002075564			5	79	0.468354	0	0	0	0	0	0
ENSMUSG00002075201			2	121	0.413223	0	0	0	0	0	0
ENSMUSG00002075202			10	111	0.423423	0	0	0	0	0	0
ENSMUSG00002076296			2	126	0.404762	0	0	0	0	0	0
ENSMUSG00002075204			3	110	0.627273	0	0	0	0	0	0
ENSMUSG00002076298			3	121	0.479339	1	1	0	0	0	0
ENSMUSG00002076299			13	138	0.666667	0	0	0	0	0	0
ENSMUSG00002075207			17	92	0.576087	0	0	0	0	0	0
ENSMUSG00002075208			2	458	0.399563	0	0	0	0	0	0
ENSMUSG00002076302			6	184	0.472826	0	0	0	6	2	2
ENSMUSG00002075574			14	114	0.263158	0	0	0	0	0	0
ENSMUSG00002075211			7	110	0.563636	2	0	0	1	0	0
ENSMUSG00002075212			6	207	0.318841	0	0	0	0	0	0
ENSMUSG00002075213			1	121	0.495868	0	0	0	1	0	0
ENSMUSG00002075214			7	70	0.571429	0	0	0	8	0	0
ENSMUSG00002075215			9	125	0.56	3	4	1	0	0	0
ENSMUSG00002075216			4	76	0.671053	0	0	0	0	0	0
ENSMUSG00002075217			7	95	0.421053	0	0	0	0	0	0
ENSMUSG00002075218			13	97	0.309278	0	0	0	0	0	0
ENSMUSG00002076312			X	88	0.375	0	0	0	0	0	0
ENSMUSG00002076313			11	81	0.555556	0	0	0	0	0	0
ENSMUSG00002075585			6	132	0.325758	0	0	0	0	0	0
ENSMUSG00002075222			4	77	0.636364	0	0	0	0	0	0
ENSMUSG00000119431			2	133	0.488722	0	0	0	0	0	0
ENSMUSG00002075224			6	91	0.56044	0	0	0	0	0	0
ENSMUSG00002075225			1	110	0.590909	0	0	0	0	0	0
ENSMUSG00002076319			15	107	0.672897	0	0	3	0	0	0
ENSMUSG00002075227			11	78	0.512821	1	1	0	4	2	0
ENSMUSG00002076321			3	110	0.618182	2	0	0	0	0	0
ENSMUSG00002075229			5	122	0.221311	0	0	0	0	0	0
ENSMUSG00000118903			15	132	0.424242	0	0	0	0	0	0
ENSMUSG00002075231			4	133	0.842105	13	6	1	15	11	20
ENSMUSG00002075232			16	126	0.579365	0	0	0	0	0	0
ENSMUSG00002075233			4	109	0.559633	0	0	0	0	0	0
ENSMUSG00002075234			5	110	0.627273	0	0	0	0	0	0
ENSMUSG00002076328			1	110	0.618182	0	0	0	3	0	0
ENSMUSG00002075236			10	129	0.325581	0	0	0	0	0	0
ENSMUSG00002075601			13	125	0.592	0	0	0	0	0	0
ENSMUSG00002075117			3	109	0.605505	0	0	0	0	0	0
ENSMUSG00002075238			6	129	0.511628	0	0	0	0	0	0
ENSMUSG00002075240			2	104	0.317308	0	0	0	0	0	0
ENSMUSG00002075241			17	102	0.5	0	0	0	0	0	0
ENSMUSG00002076335			12	67	0.447761	0	0	0	0	0	0
ENSMUSG00002075243			9	73	0.424658	0	0	0	0	0	0
ENSMUSG00002075244			11	54	0.62963	0	0	0	0	0	0
ENSMUSG00002075245			14	89	0.213483	0	0	0	0	0	0
ENSMUSG00002076339			1	80	0.475	0	3	0	0	0	0
ENSMUSG00002075247			15	199	0.502513	3	1	0	1	6	17
ENSMUSG00002075248			18	70	0.271429	0	4	1	1	2	0
ENSMUSG00000094722			JH584298.1	1446	0.464039	0	0	0	0	0	0
ENSMUSG00002075250			19	159	0.471698	2	0	0	15	21	9
ENSMUSG00002076344			2	96	0.5625	0	0	0	0	0	0
ENSMUSG00000094728			GL456221.1	372	0.502688	0	0	0	0	0	0
ENSMUSG00002076346			1	82	0.52439	0	0	0	0	0	0
ENSMUSG00002075254			3	110	0.627273	0	0	0	0	0	0
ENSMUSG00002075619			4	64	0.34375	0	0	0	0	0	0
ENSMUSG00002075620			11	63	0.539683	0	0	0	0	0	0
ENSMUSG00002075257			4	110	0.754545	0	0	0	0	0	0
ENSMUSG00002075258			7	210	0.438095	0	0	0	0	0	0
ENSMUSG00002076352			17	199	0.698492	4	0	22	10	6	0
ENSMUSG00000094741			GL456354.1	1224	0.482843	0	0	0	0	0	0
ENSMUSG00002076354			10	119	0.504202	0	0	0	0	0	0
ENSMUSG00002075262			8	80	0.575	0	0	0	0	0	0
ENSMUSG00002075263			16	68	0.544118	0	0	0	0	0	0
ENSMUSG00002075264			9	119	0.361345	0	0	0	0	0	0
ENSMUSG00000095450			GL456221.1	372	0.502688	0	0	0	0	0	0
ENSMUSG00002075630			X	101	0.49505	0	0	0	0	0	0
ENSMUSG00002075267			12	64	0.375	0	0	0	0	0	0
ENSMUSG00002075268			6	92	0.445652	0	0	0	0	0	0
ENSMUSG00002075269			6	111	0.468468	0	0	0	1	0	0
ENSMUSG00002076727			7	107	0.579439	0	0	0	0	0	0
ENSMUSG00002076485			4	121	0.495868	0	0	0	0	0	0
ENSMUSG00002075272			2	118	0.372881	0	0	0	0	0	0
ENSMUSG00002076366			1	62	0.645161	0	0	0	0	0	0
ENSMUSG00002076367			13	138	0.666667	0	0	0	0	0	0
ENSMUSG00002075275			6	180	0.322222	0	0	0	0	0	0
ENSMUSG00002076369			13	142	0.507042	0	0	0	0	0	0
ENSMUSG00002076370			7	217	0.382488	0	0	0	0	0	0
ENSMUSG00002076734			6	70	0.328571	0	0	3	0	0	0
ENSMUSG00002075279			12	98	0.489796	0	0	0	0	0	0
ENSMUSG00002075644			6	110	0.618182	0	0	0	0	0	0
ENSMUSG00002076738			9	92	0.445652	0	0	0	0	0	0
ENSMUSG00002075646			X	78	0.538462	0	0	0	0	0	0
ENSMUSG00002076376			9	101	0.247525	0	0	0	0	0	0
ENSMUSG00002075284			X	69	0.565217	0	0	0	0	0	0
ENSMUSG00002076742			11	77	0.545455	0	0	0	0	0	0
ENSMUSG00002075286			6	101	0.49505	0	0	0	0	5	0
ENSMUSG00002076744			14	136	0.382353	0	0	0	0	0	0
ENSMUSG00002076381			3	65	0.615385	0	0	4	1	0	0
ENSMUSG00002075289			1	107	0.672897	0	0	0	0	0	0
ENSMUSG00002076018			12	117	0.393162	0	0	0	0	0	0
ENSMUSG00002075655			9	101	0.564356	0	0	0	0	0	0
ENSMUSG00002075292			4	129	0.317829	0	0	0	0	0	0
ENSMUSG00000095505			JH584296.1	837	0.46595	0	0	0	0	0	0
ENSMUSG00002075294			8	121	0.479339	0	0	0	0	0	0
ENSMUSG00002076388			2	123	0.333333	0	0	0	0	0	0
ENSMUSG00002075296			X	127	0.472441	0	0	0	0	0	0
ENSMUSG00002075297			17	59	0.79661	0	0	0	0	0	0
ENSMUSG00002076391			18	104	0.567308	0	0	0	0	0	0
ENSMUSG00000119010			14	132	0.484848	0	0	0	1	0	0
ENSMUSG00002075300			8	145	0.193103	0	0	0	0	0	0
ENSMUSG00002075301			11	144	0.284722	0	0	0	0	0	0
ENSMUSG00002075666			6	125	0.584	0	0	1	0	0	0
ENSMUSG00002075303			16	65	0.307692	0	0	0	0	0	0
ENSMUSG00002075304			11	177	0.384181	0	0	0	0	0	0
ENSMUSG00002075305			8	58	0.327586	0	0	0	0	0	0
ENSMUSG00002075306			12	120	0.358333	0	0	0	0	0	0
ENSMUSG00002076764			5	78	0.564103	0	0	4	0	0	0
ENSMUSG00002075308			16	111	0.279279	0	0	0	0	0	0
ENSMUSG00002076402			4	129	0.395349	0	0	0	0	0	0
ENSMUSG00002076403			5	69	0.449275	0	0	0	0	0	0
ENSMUSG00002076404			2	123	0.390244	1	0	1	3	0	0
ENSMUSG00002075312			3	138	0.557971	0	0	0	0	0	0
ENSMUSG00002075677			13	76	0.671053	0	0	0	0	0	0
ENSMUSG00002076407			13	100	0.47	0	0	0	0	0	0
ENSMUSG00000118852			8	132	0.507576	0	0	0	0	0	0
ENSMUSG00002075316			6	96	0.270833	0	0	1	0	0	0
ENSMUSG00002075317			1	110	0.572727	0	0	0	0	0	0
ENSMUSG00002076046			19	261	0.35249	0	0	0	0	0	0
ENSMUSG00002075683			18	50	0.92	0	0	0	0	0	0
ENSMUSG00002076413			X	128	0.375	0	0	0	0	0	0
ENSMUSG00002075321			7	110	0.609091	0	0	0	0	0	0
ENSMUSG00002076414			1	78	0.525641	0	0	0	0	0	0
ENSMUSG00002076780			1	121	0.495868	0	0	0	0	0	0
ENSMUSG00002075688			18	110	0.590909	0	0	0	0	1	1
ENSMUSG00002076418			6	110	0.618182	0	0	0	0	0	0
ENSMUSG00002076419			7	80	0.5875	0	0	0	0	0	0
ENSMUSG00002075691			8	77	0.545455	0	0	0	0	0	1
ENSMUSG00002076421			17	88	0.534091	8	4	5	2	10	11
ENSMUSG00002076058			8	125	0.576	0	0	0	0	0	3
ENSMUSG00002075330			6	171	0.479532	0	0	0	0	0	0
ENSMUSG00000119589			13	133	0.398496	0	4	2	6	1	1
ENSMUSG00002075332			19	407	0.447174	0	0	0	0	0	0
ENSMUSG00002076426			5	93	0.462366	0	0	0	0	0	0
ENSMUSG00002075334			11	126	0.587302	0	0	0	0	0	0
ENSMUSG00002076428			6	110	0.563636	0	0	0	0	0	0
ENSMUSG00002075336			13	114	0.377193	2	1	0	0	0	3
ENSMUSG00002075337			2	101	0.49505	0	0	0	0	0	0
ENSMUSG00002075338			19	78	0.576923	8	5	17	18	1	8
ENSMUSG00002075339			7	66	0.575758	0	0	0	0	0	0
ENSMUSG00002075340			13	108	0.268519	0	0	0	0	0	0
ENSMUSG00002075341			11	73	0.260274	0	0	0	0	4	0
ENSMUSG00002075342			6	102	0.5	0	0	0	0	0	0
ENSMUSG00002075343			13	83	0.325301	0	0	0	0	0	0
ENSMUSG00002075344			6	214	0.406542	0	0	0	0	0	0
ENSMUSG00002075345			15	232	0.37069	0	0	0	0	0	0
ENSMUSG00002075346			3	109	0.33945	0	0	0	0	0	0
ENSMUSG00002075347			7	126	0.571429	0	0	0	0	0	0
ENSMUSG00002075348			3	107	0.672897	0	0	0	0	0	0
ENSMUSG00002075349			15	102	0.5	0	0	0	0	0	0
ENSMUSG00002075350			13	116	0.534483	0	0	0	0	0	0
ENSMUSG00002075715			10	73	0.315068	0	0	0	0	0	0
ENSMUSG00002075352			7	94	0.595745	0	0	0	0	0	0
ENSMUSG00002075717			15	126	0.571429	0	0	0	0	0	0
ENSMUSG00002075354			4	90	0.5	0	0	0	0	0	0
ENSMUSG00002075355			1	122	0.5	0	0	0	0	0	0
ENSMUSG00002076449			5	78	0.589744	0	0	0	0	0	0
ENSMUSG00002076450			11	108	0.509259	0	0	1	0	0	0
ENSMUSG00002076451			12	70	0.7	0	0	0	0	0	0
ENSMUSG00000094915			GL456212.1	366	0.418033	0	0	0	0	0	0
ENSMUSG00002075360			4	74	0.364865	0	2	0	0	0	0
ENSMUSG00002075361			8	153	0.581699	0	0	0	0	0	0
ENSMUSG00000119100			6	132	0.469697	0	0	0	0	0	0
ENSMUSG00002076456			4	96	0.46875	0	0	2	3	0	0
ENSMUSG00002075364			6	101	0.49505	0	0	0	0	0	0
ENSMUSG00002075365			4	121	0.38843	0	0	0	0	0	0
ENSMUSG00002076823			10	237	0.518987	0	0	0	0	0	0
ENSMUSG00002075367			15	92	0.336957	0	0	0	0	0	0
ENSMUSG00002075368			1	88	0.625	0	0	0	0	0	0
ENSMUSG00000119112			2	132	0.484848	0	0	0	0	0	0
ENSMUSG00002075370			14	105	0.552381	0	0	0	0	0	0
ENSMUSG00002075371			2	68	0.279412	0	0	0	0	0	0
ENSMUSG00002075372			19	126	0.563492	0	0	0	0	0	0
ENSMUSG00002075373			8	111	0.558559	0	0	0	0	0	0
ENSMUSG00002075374			10	72	0.458333	0	0	0	0	0	0
ENSMUSG00002075375			10	162	0.462963	0	0	0	0	0	0
ENSMUSG00002075376			15	60	0.666667	0	0	0	0	0	0
ENSMUSG00002075377			1	75	0.466667	0	0	0	0	0	0
ENSMUSG00002075378			1	96	0.59375	0	0	0	0	0	0
ENSMUSG00002076472			2	103	0.621359	0	0	0	0	0	0
ENSMUSG00002076473			2	96	0.322917	0	0	6	0	0	0
ENSMUSG00002075381			19	132	0.333333	0	0	0	0	0	0
ENSMUSG00002075382			16	110	0.636364	0	0	0	0	0	0
ENSMUSG00002075383			11	97	0.536082	0	0	0	0	0	0
ENSMUSG00002075384			7	96	0.59375	0	0	0	0	0	0
ENSMUSG00002075385			13	196	0.418367	0	0	0	0	0	0
ENSMUSG00002076479			18	74	0.810811	0	0	0	0	0	0
ENSMUSG00002076480			4	60	0.55	0	0	0	0	0	0
ENSMUSG00002075388			11	96	0.65625	0	0	0	0	0	0
ENSMUSG00002076482			15	101	0.49505	0	0	0	0	0	0
ENSMUSG00002075390			X	92	0.532609	1	0	0	0	0	0
ENSMUSG00002076484			19	104	0.403846	0	0	0	0	0	0
ENSMUSG00002075513			9	67	0.432836	0	0	0	0	0	0
ENSMUSG00002075757			X	100	0.59	0	0	0	0	0	5
ENSMUSG00002076487			11	109	0.550459	0	0	0	0	0	0
ENSMUSG00002075395			13	108	0.564815	0	0	0	0	0	0
ENSMUSG00002076489			2	89	0.426966	4	1	7	4	5	6
ENSMUSG00002075397			6	96	0.65625	0	0	0	0	0	0
ENSMUSG00002076491			9	69	0.565217	0	0	0	0	0	0
ENSMUSG00002075399			X	115	0.391304	0	0	0	0	0	0
ENSMUSG00002075764			4	60	0.716667	0	0	0	0	0	0
ENSMUSG00002076494			14	161	0.391304	0	0	0	0	0	0
ENSMUSG00002075766			5	98	0.418367	0	0	0	0	0	0
ENSMUSG00002076860			7	129	0.465116	11	12	10	13	15	6
ENSMUSG00002076861			12	121	0.561983	0	0	0	0	0	0
ENSMUSG00002075769			7	101	0.50495	0	0	0	0	0	0
ENSMUSG00000119163			13	133	0.390977	0	1	0	0	3	0
ENSMUSG00002076500			2	137	0.576642	0	0	0	0	0	0
ENSMUSG00000119166			8	92	0.380435	0	0	0	0	0	0
ENSMUSG00002076502			7	110	0.545455	0	0	0	0	0	0
ENSMUSG00002075410			4	84	0.5	0	0	0	0	0	0
ENSMUSG00000119172			6	129	0.503876	0	0	0	0	0	0
ENSMUSG00002075412			X	119	0.478992	0	4	0	3	0	0
ENSMUSG00002075413			15	57	0.649123	0	0	0	0	0	0
ENSMUSG00002075414			5	150	0.573333	0	0	0	0	0	0
ENSMUSG00002075415			3	127	0.307087	0	0	0	0	0	0
ENSMUSG00002076509			16	95	0.421053	0	0	0	0	0	0
ENSMUSG00002076510			2	120	0.425	0	0	0	0	0	0
ENSMUSG00002076511			5	87	0.402299	0	0	0	0	0	0
ENSMUSG00002076512			3	101	0.49505	0	0	0	0	0	0
ENSMUSG00002076877			6	74	0.648649	0	1	4	0	0	0
ENSMUSG00002075421			9	128	0.546875	1	0	0	8	0	0
ENSMUSG00002076515			13	138	0.666667	0	0	0	0	0	0
ENSMUSG00002075423			7	61	0.295082	0	0	0	0	0	0
ENSMUSG00002075424			16	98	0.561224	0	0	0	0	0	0
ENSMUSG00002075425			8	137	0.510949	0	0	0	0	0	0
ENSMUSG00002076519			7	110	0.590909	0	0	0	0	0	2
ENSMUSG00002076520			13	101	0.49505	0	0	0	0	0	0
ENSMUSG00002076521			5	110	0.609091	2	0	0	0	0	0
ENSMUSG00002076522			4	103	0.533981	0	0	0	0	0	0
ENSMUSG00002075430			18	185	0.513514	0	0	0	0	0	0
ENSMUSG00002075431			2	370	0.391892	0	0	0	0	0	0
ENSMUSG00002075796			17	82	0.878049	0	0	0	0	0	0
ENSMUSG00002075433			14	118	0.525424	0	0	0	0	0	0
ENSMUSG00002075797			17	113	0.628319	0	0	0	0	0	0
ENSMUSG00002075435			18	121	0.495868	0	0	0	1	0	2
ENSMUSG00002075315			13	103	0.572816	0	0	0	0	0	0
ENSMUSG00002076530			13	171	0.444444	27	12	16	41	10	14
ENSMUSG00002076166			X	110	0.572727	0	0	0	0	0	0
ENSMUSG00002075439			2	65	0.446154	0	0	0	0	0	0
ENSMUSG00002075440			15	116	0.517241	0	0	0	0	0	0
ENSMUSG00002076534			4	77	0.519481	0	0	0	6	0	0
ENSMUSG00002076535			15	169	0.260355	0	0	0	0	0	0
ENSMUSG00000095092			GL456210.1	366	0.483607	0	0	0	0	0	0
ENSMUSG00002075444			13	141	0.680851	0	0	0	0	0	0
ENSMUSG00002075445			X	128	0.46875	0	0	0	0	0	0
ENSMUSG00000119221			X	114	0.403509	0	0	0	0	0	0
ENSMUSG00002076540			2	118	0.313559	0	0	0	0	0	0
ENSMUSG00002075448			6	187	0.588235	0	0	0	0	0	0
ENSMUSG00002075449			Y	110	0.618182	0	0	0	0	0	0
ENSMUSG00002076543			2	294	0.455782	0	0	1	0	0	0
ENSMUSG00000095779		novel pseudogene	4	1897	0.524512	0	0	0	0	0	0
ENSMUSG00002075816			19	70	0.6	0	0	0	0	0	0
ENSMUSG00002075453			11	216	0.527778	0	0	0	0	0	0
ENSMUSG00002075454			4	107	0.551402	0	0	0	0	0	0
ENSMUSG00002075455			17	110	0.618182	0	0	0	0	0	0
ENSMUSG00002075456			4	83	0.493976	3	0	0	0	1	0
ENSMUSG00002075821			12	135	0.474074	0	0	1	7	0	0
ENSMUSG00002075458			1	94	0.478723	0	0	0	0	0	0
ENSMUSG00002075459			8	97	0.402062	0	0	0	0	0	0
ENSMUSG00002075460			12	70	0.514286	0	0	0	0	0	0
ENSMUSG00002075825			X	68	0.514706	0	0	0	0	0	0
ENSMUSG00002075462			3	92	0.532609	0	0	0	0	0	0
ENSMUSG00002075099			13	119	0.546218	0	0	0	0	0	0
ENSMUSG00002075464			9	84	0.488095	0	0	0	0	0	0
ENSMUSG00002075465			15	62	0.66129	0	0	0	0	0	0
ENSMUSG00002076923			15	95	0.915789	0	0	0	0	0	0
ENSMUSG00002076560			2	124	0.290323	0	0	0	0	0	0
ENSMUSG00002075468			3	110	0.618182	0	0	0	0	0	0
ENSMUSG00002076562			12	109	0.577982	0	0	0	1	0	0
ENSMUSG00002076927			9	67	0.402985	0	0	0	0	0	0
ENSMUSG00002076564			5	76	0.644737	2	1	0	0	0	0
ENSMUSG00002075472			2	150	0.293333	0	0	0	0	0	0
ENSMUSG00002075473			16	110	0.581818	0	0	0	0	0	0
ENSMUSG00002076930			11	104	0.538462	0	0	0	0	0	0
ENSMUSG00002075475			5	138	0.565217	0	0	0	0	0	0
ENSMUSG00002075840			3	108	0.453704	0	0	0	0	0	0
ENSMUSG00002075477			4	110	0.627273	0	0	0	0	0	0
ENSMUSG00002075478			19	99	0.424242	0	0	0	4	0	0
ENSMUSG00002075479			4	72	0.486111	3	4	16	1	16	0
ENSMUSG00002075844			15	129	0.534884	0	0	0	0	0	0
ENSMUSG00002076574			12	63	0.31746	0	3	15	9	2	0
ENSMUSG00002075482			19	64	0.5625	0	0	0	0	0	0
ENSMUSG00002076576			17	61	0.491803	0	0	0	0	0	0
ENSMUSG00002075484			12	76	0.486842	0	0	0	1	0	0
ENSMUSG00002075485			4	77	0.571429	0	0	0	0	0	0
ENSMUSG00002075486			17	110	0.318182	0	0	0	0	0	1
ENSMUSG00002076580			2	92	0.358696	0	0	0	0	0	0
ENSMUSG00002075488			5	67	0.402985	3	0	0	0	0	0
ENSMUSG00002075489			4	110	0.418182	0	0	0	0	0	0
ENSMUSG00000110849		olfactory receptor 1545, pseudogene 1	9	375	0.410667	0	0	0	0	0	0
ENSMUSG00002075491			15	70	0.357143	0	0	0	0	0	0
ENSMUSG00002076585			2	126	0.404762	0	0	0	0	0	0
ENSMUSG00002075493			X	106	0.650943	0	0	0	0	0	0
ENSMUSG00002076951			5	77	0.532468	2	1	0	0	0	0
ENSMUSG00002076588			18	101	0.49505	0	0	0	0	0	0
ENSMUSG00002076589			1	101	0.50495	0	0	0	0	0	0
ENSMUSG00002075497			16	102	0.558824	0	0	0	0	0	0
ENSMUSG00002076591			3	110	0.581818	0	0	0	0	0	0
ENSMUSG00000115423		novel protein	2	944	0.474576	0	0	0	0	0	0
ENSMUSG00002075500			11	90	0.566667	0	0	0	0	0	0
ENSMUSG00002075501			1	56	0.714286	2	3	0	1	0	0
ENSMUSG00002075502			3	111	0.405405	0	0	0	0	0	0
ENSMUSG00002076596			12	136	0.485294	0	0	0	0	0	0
ENSMUSG00002076597			1	109	0.577982	0	0	0	0	0	0
ENSMUSG00002076598			7	123	0.390244	0	0	0	0	0	0
ENSMUSG00002075870			12	96	0.395833	5	0	12	3	0	0
ENSMUSG00002076964			11	136	0.536765	0	0	0	0	0	0
ENSMUSG00002075508			4	133	0.511278	0	0	0	0	0	0
ENSMUSG00002076602			5	93	0.354839	0	0	0	0	0	0
ENSMUSG00000111302		olfactory receptor 1236, pseudogene 1	2	509	0.365422	0	0	0	0	0	0
ENSMUSG00002075511			5	179	0.625698	0	0	0	0	0	0
ENSMUSG00002076605			13	121	0.495868	0	0	0	0	0	0
ENSMUSG00000118960			3	130	0.484615	0	0	0	0	0	0
ENSMUSG00002075514			4	88	0.431818	3	0	2	0	0	0
ENSMUSG00002075515			6	95	0.463158	0	0	0	0	0	0
ENSMUSG00002075516			11	93	0.591398	0	0	0	0	0	0
ENSMUSG00002076610			12	110	0.563636	0	0	0	0	0	0
ENSMUSG00002075518			2	96	0.583333	0	0	0	0	0	0
ENSMUSG00002075519			4	120	0.416667	0	0	0	0	0	0
ENSMUSG00002075520			4	91	0.681319	0	0	0	0	0	0
ENSMUSG00002076614			9	91	0.461538	0	0	0	0	0	0
ENSMUSG00002075522			11	84	0.321429	0	0	0	0	0	0
ENSMUSG00002075523			8	82	0.439024	0	0	0	0	0	0
ENSMUSG00002075524			9	57	0.736842	55	49	45	42	101	48
ENSMUSG00002076617			2	121	0.38843	0	0	0	0	0	0
ENSMUSG00002075526			16	113	0.460177	0	0	0	0	0	0
ENSMUSG00002075527			1	101	0.485149	0	0	0	0	0	0
ENSMUSG00002075528			2	67	0.716418	0	0	0	0	0	0
ENSMUSG00002076622			5	110	0.3	0	0	0	0	0	0
ENSMUSG00002075894			12	119	0.151261	0	0	0	0	0	0
ENSMUSG00002075531			1	121	0.512397	0	0	0	0	0	0
ENSMUSG00002075532			16	88	0.306818	0	0	0	4	0	0
ENSMUSG00002075533			6	73	0.671233	0	0	0	0	0	0
ENSMUSG00002075898			11	117	0.247863	1	0	0	0	0	0
ENSMUSG00002075535			7	125	0.56	0	0	0	0	0	0
ENSMUSG00002075536			7	91	0.505495	0	0	0	0	0	0
ENSMUSG00002075537			4	85	0.858824	0	0	0	0	0	0
ENSMUSG00002075538			14	117	0.273504	0	0	0	0	0	0
ENSMUSG00000118029		TEC	19	2090	0.57177	13	11	22	8	11	0
ENSMUSG00002075904			13	142	0.661972	0	0	0	5	0	0
ENSMUSG00002075541			2	127	0.377953	0	0	0	0	0	0
ENSMUSG00002076635			3	121	0.495868	0	0	0	0	0	2
ENSMUSG00002075907			8	90	0.833333	0	0	0	0	0	0
ENSMUSG00002075544			7	66	0.333333	0	0	0	0	0	0
ENSMUSG00002075545			1	77	0.532468	1	0	1	1	7	3
ENSMUSG00002075546			12	104	0.557692	0	0	0	0	0	0
ENSMUSG00002075547			4	64	0.609375	0	0	0	0	0	0
ENSMUSG00002076641			X	85	0.376471	0	0	0	0	0	0
ENSMUSG00002076642			7	121	0.479339	0	0	0	0	0	0
ENSMUSG00002075914			12	78	0.666667	0	0	0	0	0	0
ENSMUSG00002075551			13	57	0.719298	0	0	0	0	0	0
ENSMUSG00002075552			1	105	0.485714	0	0	0	0	0	0
ENSMUSG00002075553			4	110	0.372727	0	0	1	3	4	1
ENSMUSG00002075554			8	131	0.465649	0	0	0	0	0	0
ENSMUSG00002075555			8	80	0.5125	0	0	0	0	0	0
ENSMUSG00002075556			2	84	0.345238	0	0	0	0	0	0
ENSMUSG00002075436			15	77	0.493506	0	0	0	0	0	0
ENSMUSG00002076651			12	207	0.347826	0	0	0	0	0	0
ENSMUSG00000119928			12	132	0.5	0	0	0	0	0	0
ENSMUSG00002075560			X	86	0.395349	0	0	0	0	0	0
ENSMUSG00000119930			5	123	0.487805	0	0	0	0	0	0
ENSMUSG00002075562			9	127	0.385827	1	2	0	0	1	0
ENSMUSG00002075927			6	112	0.589286	0	0	0	0	0	0
ENSMUSG00002075928			6	114	0.333333	0	0	0	0	0	0
ENSMUSG00002075565			4	102	0.5	0	0	0	0	1	0
ENSMUSG00002075566			9	82	0.47561	0	0	0	0	0	0
ENSMUSG00002075931			11	216	0.527778	0	0	0	0	0	0
ENSMUSG00002076661			1	84	0.47619	0	0	0	0	0	0
ENSMUSG00000119398			17	88	0.443182	0	0	0	0	0	0
ENSMUSG00002076663			17	126	0.571429	0	0	0	0	0	0
ENSMUSG00002075571			16	110	0.618182	0	0	0	0	0	0
ENSMUSG00002076665			15	173	0.624277	0	0	0	0	0	0
ENSMUSG00002075573			12	86	0.546512	0	0	0	0	0	0
ENSMUSG00002076666			11	138	0.586957	0	0	0	0	0	0
ENSMUSG00002075575			18	110	0.554545	0	0	0	0	0	0
ENSMUSG00002075576			11	101	0.445545	0	0	0	0	0	0
ENSMUSG00002076669			1	154	0.5	0	0	0	0	0	0
ENSMUSG00002075942			8	91	0.307692	0	0	0	0	0	0
ENSMUSG00002075579			11	66	0.30303	0	0	0	0	0	0
ENSMUSG00002075580			6	143	0.447552	0	0	0	0	0	0
ENSMUSG00002075581			3	106	0.396226	0	0	0	0	0	0
ENSMUSG00000119417			19	50	0.42	0	0	0	0	0	0
ENSMUSG00002075583			1	143	0.517483	0	0	0	0	0	0
ENSMUSG00002075584			8	130	0.446154	0	0	0	0	0	0
ENSMUSG00002075949			X	137	0.430657	0	0	0	0	0	0
ENSMUSG00002076679			15	116	0.189655	0	0	0	0	0	0
ENSMUSG00002075951			5	83	0.457831	0	0	0	0	0	0
ENSMUSG00000119432			9	72	0.402778	0	0	0	0	0	0
ENSMUSG00002076682			9	59	0.627119	0	0	0	0	0	0
ENSMUSG00002075590			15	69	0.463768	0	0	0	0	0	0
ENSMUSG00002075591			12	142	0.415493	1	0	0	0	0	0
ENSMUSG00002075592			8	60	0.666667	0	0	0	0	0	0
ENSMUSG00002076686			2	126	0.380952	0	0	0	0	0	0
ENSMUSG00002075958			8	127	0.464567	0	0	0	0	0	0
ENSMUSG00002076808			3	120	0.491667	0	0	0	0	0	0
ENSMUSG00002075596			12	110	0.572727	0	0	0	0	0	0
ENSMUSG00002075597			13	138	0.666667	0	0	0	0	0	0
ENSMUSG00002075598			10	203	0.448276	0	0	0	0	0	0
ENSMUSG00002075599			17	100	0.51	0	0	0	0	0	0
ENSMUSG00002076692			8	110	0.618182	0	0	0	0	0	0
ENSMUSG00002074870			7	96	0.510417	0	0	0	0	0	0
ENSMUSG00002075602			19	87	0.862069	2	0	1	4	6	1
ENSMUSG00002075603			17	117	0.641026	0	0	0	0	1	1
ENSMUSG00002076697			3	138	0.637681	0	0	0	0	0	0
ENSMUSG00002075605			13	129	0.457364	0	0	0	0	0	0
ENSMUSG00002075606			X	64	0.421875	0	0	0	0	0	0
ENSMUSG00002075607			14	256	0.386719	0	0	0	0	0	0
ENSMUSG00002075608			6	95	0.442105	0	0	0	0	3	0
ENSMUSG00002076702			5	74	0.567568	0	0	0	0	0	0
ENSMUSG00002075610			11	71	0.422535	0	0	0	0	0	0
ENSMUSG00002075611			1	93	0.483871	0	0	0	0	0	0
ENSMUSG00002076705			8	109	0.633028	0	0	0	0	0	0
ENSMUSG00000119468			13	132	0.469697	0	0	0	0	0	0
ENSMUSG00000079190			GL456211.1	1473	0.492193	0	0	0	3	0	0
ENSMUSG00000079192			GL456210.1	255	0.466667	0	0	0	0	0	0
ENSMUSG00000118106		TEC	19	2276	0.52065	0	0	0	2	0	0
ENSMUSG00002075617			14	112	0.178571	0	0	1	0	0	2
ENSMUSG00002075618			13	66	0.333333	0	5	2	0	0	0
ENSMUSG00002075983			12	70	0.7	0	0	0	0	0	0
ENSMUSG00002075984			19	121	0.495868	0	0	7	0	0	0
ENSMUSG00002075621			12	87	0.551724	0	0	0	0	0	0
ENSMUSG00002075622			9	107	0.672897	0	0	0	0	0	0
ENSMUSG00002075623			19	109	0.577982	0	0	0	0	0	0
ENSMUSG00000119486			2	132	0.44697	0	0	0	0	0	0
ENSMUSG00002075625			6	70	0.7	0	0	0	0	0	0
ENSMUSG00002075626			7	107	0.663551	0	0	0	0	0	0
ENSMUSG00002075627			17	116	0.275862	0	0	0	0	0	0
ENSMUSG00002075628			1	85	0.2	0	0	0	0	0	0
ENSMUSG00002075993			13	107	0.672897	0	0	0	0	0	0
ENSMUSG00002075994			19	107	0.654206	0	0	0	0	0	0
ENSMUSG00002075631			2	126	0.380952	0	0	0	0	0	0
ENSMUSG00002075996			7	84	0.488095	0	0	0	0	0	0
ENSMUSG00002076726			13	109	0.59633	0	0	0	0	0	0
ENSMUSG00002076483			5	101	0.50495	0	0	0	0	0	0
ENSMUSG00002075756			9	97	0.453608	0	0	0	0	0	0
ENSMUSG00002076729			X	86	0.395349	0	0	0	0	0	0
ENSMUSG00002076730			17	223	0.632287	0	1	0	0	4	0
ENSMUSG00002076731			2	79	0.506329	3	0	1	4	7	4
ENSMUSG00002075639			X	97	0.639175	0	0	0	0	0	0
ENSMUSG00000118969			6	132	0.469697	0	0	0	0	0	0
ENSMUSG00002075641			7	110	0.590909	0	0	0	0	0	0
ENSMUSG00002075763			13	101	0.49505	0	0	0	1	0	0
ENSMUSG00002076128			15	95	0.242105	0	0	0	0	0	0
ENSMUSG00002076372			15	52	0.596154	0	0	0	0	0	0
ENSMUSG00000095672			GL456211.1	366	0.486339	0	0	0	0	0	0
ENSMUSG00002076010			X	93	0.537634	4	0	2	1	4	1
ENSMUSG00002075647			2	96	0.53125	0	0	0	1	0	0
ENSMUSG00002076012			6	90	0.388889	0	0	0	0	0	0
ENSMUSG00002076377			7	109	0.651376	0	0	0	0	0	0
ENSMUSG00002075650			1	112	0.151786	0	0	0	0	0	0
ENSMUSG00002076743			2	125	0.576	0	0	0	0	0	0
ENSMUSG00002075652			17	121	0.495868	0	0	0	0	0	0
ENSMUSG00002075653			6	121	0.479339	0	0	0	0	0	0
ENSMUSG00002076382			16	73	0.547945	0	0	1	6	0	0
ENSMUSG00002076383			9	86	0.604651	0	0	0	0	0	0
ENSMUSG00000119532			X	143	0.482517	0	0	0	0	0	0
ENSMUSG00002076021			6	233	0.313305	0	0	0	0	0	0
ENSMUSG00000113373		novel protein	5	138	0.478261	0	0	0	0	0	0
ENSMUSG00002076752			1	112	0.598214	0	0	0	0	0	0
ENSMUSG00002075660			12	70	0.657143	0	0	0	0	0	0
ENSMUSG00002075661			4	65	0.876923	0	0	0	0	0	0
ENSMUSG00002075662			6	177	0.40678	0	0	0	0	0	3
ENSMUSG00002076027			X	110	0.454545	0	0	0	0	0	0
ENSMUSG00002075664			5	160	0.6875	0	0	0	0	0	0
ENSMUSG00002075665			6	146	0.486301	0	0	0	0	0	0
ENSMUSG00002075787			18	113	0.60177	0	0	0	0	0	0
ENSMUSG00002075667			9	84	0.416667	0	0	0	0	0	0
ENSMUSG00002075668			2	121	0.421488	0	0	0	0	0	0
ENSMUSG00002076762			10	122	0.52459	0	0	0	0	0	0
ENSMUSG00002075670			16	108	0.657407	0	0	0	0	0	0
ENSMUSG00002076399			2	260	0.334615	0	0	0	0	0	0
ENSMUSG00002075672			16	124	0.516129	1	2	4	0	2	1
ENSMUSG00002076765			2	94	0.255319	0	0	0	0	0	0
ENSMUSG00002076767			X	80	0.55	0	0	0	0	0	0
ENSMUSG00002075675			13	138	0.666667	3	5	22	7	7	0
ENSMUSG00002075676			12	80	0.575	0	0	0	0	0	0
ENSMUSG00002076041			X	106	0.650943	0	0	0	0	0	0
ENSMUSG00002076406			19	106	0.424528	0	0	0	0	0	0
ENSMUSG00002075679			6	93	0.903226	0	0	4	3	5	2
ENSMUSG00002075680			11	109	0.633028	0	0	0	0	0	1
ENSMUSG00002076409			14	113	0.39823	0	0	0	0	0	0
ENSMUSG00002076410			12	65	0.338462	0	0	0	0	0	0
ENSMUSG00002076411			6	102	0.5	0	0	0	0	0	0
ENSMUSG00002075684			10	83	0.39759	0	0	0	0	0	0
ENSMUSG00002075685			11	147	0.353741	0	0	0	0	0	0
ENSMUSG00002076778			2	129	0.426357	0	0	0	0	0	0
ENSMUSG00000119577			8	144	0.527778	0	0	0	6	1	3
ENSMUSG00002076416			2	83	0.313253	0	0	0	0	0	0
ENSMUSG00002076295			10	83	0.662651	0	1	0	0	0	1
ENSMUSG00002075690			12	61	0.540984	0	0	0	0	0	0
ENSMUSG00000096236			JH584297.1	1221	0.481572	0	0	0	0	0	0
ENSMUSG00002075692			4	66	0.333333	0	0	0	0	0	0
ENSMUSG00002075329			15	124	0.403226	0	0	0	0	0	0
ENSMUSG00002075694			8	110	0.581818	0	0	0	0	0	0
ENSMUSG00002076423			X	121	0.61157	0	0	0	0	0	0
ENSMUSG00002075696			4	120	0.566667	0	0	1	4	0	0
ENSMUSG00002076790			9	104	0.596154	0	0	0	0	0	0
ENSMUSG00002076791			1	78	0.576923	0	0	0	0	0	0
ENSMUSG00000095570			GL456354.1	1443	0.471933	0	0	0	0	0	0
ENSMUSG00002075700			X	121	0.495868	0	0	0	0	0	0
ENSMUSG00002076065			5	70	0.314286	0	0	0	0	0	0
ENSMUSG00002076795			8	199	0.341709	0	0	0	0	0	0
ENSMUSG00002075703			8	101	0.49505	0	0	0	0	0	0
ENSMUSG00002075704			14	107	0.242991	0	0	0	0	0	0
ENSMUSG00002076798			19	116	0.413793	0	0	0	0	0	0
ENSMUSG00002076070			9	110	0.627273	0	0	0	0	0	0
ENSMUSG00002076800			2	110	0.618182	0	0	0	0	0	0
ENSMUSG00002075708			14	80	0.575	0	0	0	0	0	0
ENSMUSG00002075709			5	135	0.659259	0	0	0	0	0	0
ENSMUSG00002075710			2	77	0.454545	0	5	4	1	0	12
ENSMUSG00002075711			13	138	0.666667	0	0	0	2	0	0
ENSMUSG00002075712			5	101	0.50495	0	0	0	0	0	0
ENSMUSG00002075713			8	114	0.640351	0	0	0	1	0	0
ENSMUSG00002075714			13	124	0.564516	0	0	0	0	0	0
ENSMUSG00002076079			19	109	0.458716	0	0	0	1	0	0
ENSMUSG00002075837			Y	99	0.333333	0	0	0	0	0	0
ENSMUSG00002076445			13	141	0.673759	0	0	5	0	0	0
ENSMUSG00002076811			4	125	0.464	0	0	0	0	0	0
ENSMUSG00002075719			10	85	0.505882	0	0	0	0	0	0
ENSMUSG00002076813			1	100	0.49	0	0	0	0	0	0
ENSMUSG00002075721			X	107	0.663551	0	0	0	0	0	0
ENSMUSG00000117102		Novel transcript	17	3039	0.455742	2	1	19	0	4	0
ENSMUSG00002075723			4	90	0.4	0	0	0	0	0	0
ENSMUSG00002075724			1	121	0.495868	1	0	0	1	0	0
ENSMUSG00002075725			7	110	0.572727	0	0	0	0	0	0
ENSMUSG00002075847			1	121	0.495868	0	0	0	0	0	0
ENSMUSG00000119643			7	90	0.633333	0	0	0	0	0	0
ENSMUSG00002075728			3	91	0.307692	0	0	0	0	0	0
ENSMUSG00002075729			GL456385.1	100	0.5	0	0	0	0	0	0
ENSMUSG00002076094			4	101	0.514851	0	0	0	0	0	0
ENSMUSG00002075731			10	76	0.447368	0	0	0	0	0	0
ENSMUSG00002076825			13	108	0.546296	0	0	0	0	0	0
ENSMUSG00002075733			17	145	0.689655	0	0	2	0	0	0
ENSMUSG00002075855			7	224	0.357143	0	0	0	0	0	0
ENSMUSG00002076828			2	96	0.59375	0	0	0	0	0	0
ENSMUSG00002076464			17	323	0.674923	5	2	5	0	3	0
ENSMUSG00002075737			5	110	0.618182	1	1	0	2	0	0
ENSMUSG00002075738			2	124	0.33871	0	0	0	0	0	0
ENSMUSG00002076832			4	89	0.876404	0	0	0	0	0	0
ENSMUSG00002075740			6	110	0.554545	0	0	0	0	0	0
ENSMUSG00002075741			6	112	0.339286	8	2	2	7	1	5
ENSMUSG00002076835			2	120	0.416667	0	0	0	0	0	0
ENSMUSG00002075743			6	110	0.554545	0	0	0	0	0	0
ENSMUSG00002075744			X	86	0.406977	0	0	0	0	0	0
ENSMUSG00002075866			12	66	0.333333	2	0	5	2	0	0
ENSMUSG00002075746			13	255	0.517647	0	0	0	2	0	0
ENSMUSG00002075747			4	96	0.479167	0	0	0	0	0	0
ENSMUSG00002075748			2	102	0.5	0	0	0	0	0	0
ENSMUSG00002076477			1	116	0.465517	0	0	0	0	0	0
ENSMUSG00002076843			16	70	0.6	0	0	0	0	0	0
ENSMUSG00002075751			3	112	0.696429	0	0	0	0	0	3
ENSMUSG00002076845			14	66	0.318182	0	0	0	0	0	0
ENSMUSG00002075753			15	107	0.691589	0	0	0	0	0	0
ENSMUSG00002076847			11	88	0.363636	0	0	0	0	0	0
ENSMUSG00002076969			4	77	0.467532	0	0	0	0	0	0
ENSMUSG00002075877			13	84	0.47619	0	0	0	0	0	0
ENSMUSG00002076121			7	71	0.690141	0	1	1	0	0	0
ENSMUSG00002075758			X	122	0.606557	0	0	0	0	0	0
ENSMUSG00002075759			14	121	0.495868	0	0	0	0	0	0
ENSMUSG00002075760			11	105	0.695238	0	0	0	0	0	0
ENSMUSG00002075761			6	139	0.532374	3	3	4	10	3	5
ENSMUSG00002076855			2	53	0.679245	1	0	5	0	0	3
ENSMUSG00002076248			11	77	0.545455	0	0	0	0	0	0
ENSMUSG00002076978			18	90	0.433333	0	0	0	0	0	0
ENSMUSG00002075765			9	118	0.525424	0	0	1	0	0	0
ENSMUSG00002076980			2	127	0.393701	0	0	0	0	0	0
ENSMUSG00000118632		component of Sp100-rs (Csprs) pseudogene	1	355	0.433803	0	0	0	0	0	0
ENSMUSG00000119513			8	92	0.347826	0	0	0	0	0	0
ENSMUSG00002075890			11	138	0.652174	0	1	10	16	3	15
ENSMUSG00002075770			4	591	0.563452	0	0	0	0	0	0
ENSMUSG00002075771			8	68	0.426471	0	0	0	0	0	0
ENSMUSG00000119713			9	132	0.454545	0	0	0	0	0	0
ENSMUSG00002075773			15	138	0.557971	0	0	0	0	0	1
ENSMUSG00002075774			18	110	0.563636	0	0	0	0	0	0
ENSMUSG00002075775			6	110	0.627273	0	0	0	0	0	0
ENSMUSG00002076869			2	120	0.4	0	0	0	0	0	0
ENSMUSG00002075777			18	71	0.549296	0	0	0	0	0	0
ENSMUSG00002076871			15	114	0.508772	0	0	0	0	0	0
ENSMUSG00002075779			9	129	0.403101	0	0	4	2	0	0
ENSMUSG00000118646			10	383	0.584856	0	0	1	0	0	1
ENSMUSG00002075781			6	125	0.576	0	0	0	0	0	0
ENSMUSG00002076875			10	126	0.507937	0	0	0	0	0	0
ENSMUSG00002076876			4	126	0.579365	0	0	0	0	0	0
ENSMUSG00002076148			11	126	0.396825	0	0	0	0	0	0
ENSMUSG00002075785			8	121	0.495868	0	0	0	0	0	0
ENSMUSG00002076879			9	67	0.432836	0	0	0	0	0	0
ENSMUSG00002075908			9	126	0.555556	3	4	0	7	0	0
ENSMUSG00002076152			11	70	0.614286	0	0	0	0	0	0
ENSMUSG00000118656		olfactory receptor, family 13, subfamily H, member 1 (OR13H1) pseudogene	X	87	0.413793	0	0	0	0	0	0
ENSMUSG00002075790			10	101	0.465347	0	0	0	0	0	0
ENSMUSG00000118658		SNW domain containing 1 (Snw1) pseudogene	12	166	0.403614	0	0	0	0	0	0
ENSMUSG00002075792			7	110	0.563636	0	0	0	0	0	0
ENSMUSG00002076886			3	86	0.27907	0	0	0	0	0	0
ENSMUSG00002075794			19	110	0.536364	0	0	0	0	0	0
ENSMUSG00000095742			JH584295.1	243	0.703704	15	9	7	11	12	8
ENSMUSG00002076524			16	110	0.627273	0	0	0	0	0	0
ENSMUSG00000110033		olfactory receptor 1527, pseudogene 1	7	939	0.450479	0	0	0	0	0	0
ENSMUSG00002076162			13	138	0.666667	0	0	0	0	0	0
ENSMUSG00002075799			5	99	0.474747	0	0	0	1	0	0
ENSMUSG00002076892			10	101	0.49505	0	0	0	0	0	0
ENSMUSG00002076894			5	137	0.532847	0	0	0	0	0	0
ENSMUSG00000095076			JH584298.1	1215	0.469136	0	0	0	0	0	0
ENSMUSG00002075803			2	92	0.434783	0	0	0	0	0	0
ENSMUSG00002076168			10	110	0.581818	0	0	0	0	0	0
ENSMUSG00002075805			6	110	0.6	0	0	0	0	0	0
ENSMUSG00002076899			X	96	0.510417	0	0	0	0	0	0
ENSMUSG00002075807			10	110	0.609091	0	0	0	0	0	0
ENSMUSG00002075808			9	141	0.680851	0	4	0	0	4	0
ENSMUSG00002076537			18	166	0.355422	0	0	0	0	0	0
ENSMUSG00002076901			X	102	0.5	0	0	0	0	0	0
ENSMUSG00002076904			2	126	0.587302	0	0	0	0	0	0
ENSMUSG00002075812			2	100	0.44	0	0	0	0	0	0
ENSMUSG00002075813			19	124	0.16129	0	0	0	0	0	0
ENSMUSG00002075814			13	108	0.564815	0	0	0	0	0	0
ENSMUSG00002076907			13	138	0.666667	0	0	0	0	0	0
ENSMUSG00002076544			1	101	0.49505	0	0	0	0	0	0
ENSMUSG00002075817			4	125	0.592	0	0	0	0	0	0
ENSMUSG00002075818			X	134	0.365672	1	1	0	0	0	0
ENSMUSG00002075819			1	100	0.51	0	0	0	0	0	0
ENSMUSG00002075820			3	74	0.567568	1	0	0	0	0	0
ENSMUSG00002076185			3	101	0.49505	0	0	0	1	0	0
ENSMUSG00002075822			6	78	0.512821	0	1	0	0	0	0
ENSMUSG00002076916			10	133	0.646617	0	0	0	0	0	0
ENSMUSG00002076917			2	100	0.38	1	0	0	0	0	0
ENSMUSG00000118703			6	132	0.469697	0	0	0	0	0	0
ENSMUSG00002076919			10	94	0.595745	0	0	0	0	0	0
ENSMUSG00002075463			2	87	0.482759	27	15	38	14	24	15
ENSMUSG00002075828			8	109	0.559633	0	0	0	0	0	0
ENSMUSG00002076922			5	97	0.628866	0	0	0	0	0	0
ENSMUSG00000119612			12	132	0.507576	0	0	0	0	0	0
ENSMUSG00002075831			X	104	0.375	0	0	0	0	0	0
ENSMUSG00002076925			15	101	0.49505	0	0	0	0	0	0
ENSMUSG00002075833			4	138	0.485507	0	0	0	0	0	0
ENSMUSG00002076926			7	110	0.572727	0	0	0	1	0	0
ENSMUSG00002075835			15	71	0.535211	0	0	0	0	0	0
ENSMUSG00002075836			3	108	0.509259	0	0	0	0	0	0
ENSMUSG00002076443			16	125	0.592	0	0	0	6	0	0
ENSMUSG00000107399		olfactory receptor 1544, pseudogene 1	10	944	0.416314	0	0	0	0	0	0
ENSMUSG00002075839			1	132	0.363636	0	0	0	0	0	0
ENSMUSG00002076568			2	91	0.384615	0	0	0	2	0	0
ENSMUSG00002075841			5	105	0.514286	0	0	0	0	0	0
ENSMUSG00002075842			1	121	0.413223	1	0	8	0	0	0
ENSMUSG00002076936			14	119	0.294118	2	0	0	2	0	0
ENSMUSG00000094474			JH584299.1	1446	0.464039	0	0	0	0	0	0
ENSMUSG00002075845			X	107	0.654206	0	0	0	0	0	0
ENSMUSG00002075846			15	98	0.428571	0	0	0	0	0	0
ENSMUSG00002075968			6	126	0.555556	0	0	0	0	0	0
ENSMUSG00002075848			6	97	0.525773	4	4	5	5	9	4
ENSMUSG00002075849			5	92	0.521739	0	0	0	0	0	0
ENSMUSG00002075850			Y	110	0.618182	0	0	0	0	0	0
ENSMUSG00002075851			19	89	0.831461	0	1	0	0	0	0
ENSMUSG00002076945			17	272	0.584559	0	6	4	0	2	0
ENSMUSG00002076946			10	68	0.338235	2	0	0	2	0	0
ENSMUSG00002075854			16	110	0.290909	0	0	0	0	0	0
ENSMUSG00002075976			7	80	0.475	3	6	0	4	0	0
ENSMUSG00002075856			3	121	0.495868	0	0	0	0	0	0
ENSMUSG00002075857			8	202	0.529703	0	0	0	0	0	0
ENSMUSG00002076222			18	94	0.265957	0	0	0	0	0	0
ENSMUSG00000118748			11	132	0.515152	0	0	0	0	0	3
ENSMUSG00002075860			7	69	0.478261	0	0	0	0	0	0
ENSMUSG00002075861			11	67	0.641791	0	0	0	0	0	0
ENSMUSG00002075862			7	110	0.627273	0	0	0	0	0	0
ENSMUSG00002076712			6	147	0.578231	0	0	0	0	0	0
ENSMUSG00000096100			GL456211.1	372	0.497312	0	0	0	0	0	0
ENSMUSG00002075865			2	125	0.576	1	0	1	4	0	7
ENSMUSG00002074892			12	97	0.639175	0	0	0	0	0	0
ENSMUSG00002075867			2	76	0.434211	0	0	0	0	0	0
ENSMUSG00002074894			11	126	0.555556	0	0	0	0	0	0
ENSMUSG00002076962			1	84	0.488095	0	0	0	0	0	0
ENSMUSG00000115801		novel transcript	14	93147	0.408183	14	0	0	1	3	15
ENSMUSG00000118364		TEC	19	1757	0.480364	3	0	6	6	19	0
ENSMUSG00002075872			3	84	0.380952	0	0	0	0	0	0
ENSMUSG00002076966			X	127	0.409449	0	0	0	0	0	0
ENSMUSG00002076238			15	80	0.575	0	0	0	0	0	0
ENSMUSG00002076968			11	112	0.589286	0	0	0	0	6	0
ENSMUSG00002076361			9	97	0.412371	0	0	0	0	0	0
ENSMUSG00000118957			X	114	0.429825	0	0	0	0	0	0
ENSMUSG00002075878			2	124	0.290323	0	0	0	0	0	0
ENSMUSG00002076972			X	86	0.383721	0	0	0	0	0	0
ENSMUSG00002075880			10	67	0.402985	0	0	0	0	0	0
ENSMUSG00002075881			4	126	0.571429	0	0	0	0	0	0
ENSMUSG00002075882			12	76	0.657895	0	0	0	0	0	0
ENSMUSG00002076976			15	91	0.494505	0	0	0	0	0	0
ENSMUSG00002076005			5	68	0.764706	0	0	0	0	0	0
ENSMUSG00002076127			2	122	0.295082	0	0	0	0	0	0
ENSMUSG00002075886			6	147	0.312925	0	0	0	0	0	0
ENSMUSG00002076857			1	100	0.27	1	0	0	0	0	0
ENSMUSG00002075888			2	189	0.677249	0	0	0	0	0	0
ENSMUSG00002076859			15	101	0.49505	0	0	0	3	1	0
ENSMUSG00002076375			16	163	0.429448	0	0	0	0	0	0
ENSMUSG00002075891			19	77	0.506494	0	0	0	0	0	0
ENSMUSG00002076985			7	121	0.479339	0	0	0	0	0	0
ENSMUSG00002075893			18	121	0.495868	0	1	0	0	0	0
ENSMUSG00002076986			15	127	0.354331	0	0	0	0	0	0
ENSMUSG00002075895			16	89	0.865169	0	0	0	0	0	0
ENSMUSG00002075896			3	103	0.883495	0	0	0	0	0	0
ENSMUSG00002075897			7	102	0.558824	0	0	0	0	0	0
ENSMUSG00002076626			19	86	0.290698	0	0	0	0	0	0
ENSMUSG00002075899			19	82	0.695122	0	0	0	0	0	0
ENSMUSG00002075900			18	121	0.404959	0	0	0	0	0	0
ENSMUSG00002075901			7	110	0.627273	0	0	0	1	0	0
ENSMUSG00002075902			10	125	0.608	0	2	0	0	11	0
ENSMUSG00000111339		post-GPI attachment to proteins 2	7	606	0.542904	0	0	0	0	0	0
ENSMUSG00000118820			6	132	0.469697	0	0	0	0	0	0
ENSMUSG00002075905			12	137	0.49635	0	0	0	0	0	0
ENSMUSG00002075906			8	86	0.918605	0	0	0	0	0	0
ENSMUSG00000119358			2	136	0.441176	0	0	0	0	0	0
ENSMUSG00000119011			11	144	0.506944	8	10	3	8	16	2
ENSMUSG00002076273			14	105	0.761905	0	0	0	0	12	0
ENSMUSG00002075910			6	194	0.556701	0	3	3	0	1	0
ENSMUSG00002076639			4	110	0.627273	1	0	0	0	0	0
ENSMUSG00002076397			6	120	0.391667	0	0	0	0	0	0
ENSMUSG00002075913			4	83	0.518072	0	0	0	4	0	0
ENSMUSG00002076278			X	92	0.380435	0	0	0	0	0	0
ENSMUSG00002075915			12	109	0.568807	0	1	0	0	0	0
ENSMUSG00002075916			5	81	0.37037	0	0	0	0	0	0
ENSMUSG00002075917			4	91	0.472527	0	0	0	0	0	0
ENSMUSG00002076646			11	75	0.453333	0	0	0	0	0	0
ENSMUSG00002076283			17	98	0.244898	0	0	0	0	0	0
ENSMUSG00002075920			4	127	0.535433	0	0	0	0	0	0
ENSMUSG00002075193			10	107	0.663551	0	0	0	0	0	0
ENSMUSG00002075922			1	129	0.488372	0	0	0	0	0	0
ENSMUSG00002075557			12	162	0.524691	0	0	0	0	0	0
ENSMUSG00002076652			6	177	0.542373	0	0	0	0	0	0
ENSMUSG00002076289			14	96	0.229167	0	0	0	0	0	0
ENSMUSG00002075926			8	55	0.472727	0	0	0	0	0	0
ENSMUSG00002076655			13	109	0.495413	0	0	0	0	0	0
ENSMUSG00002076292			18	134	0.529851	0	0	0	0	0	0
ENSMUSG00002075929			2	78	0.525641	0	0	0	0	0	0
ENSMUSG00002076294			9	126	0.579365	0	0	0	0	0	0
ENSMUSG00002076658			5	80	0.75	0	0	0	0	0	0
ENSMUSG00002075932			9	108	0.0925926	0	0	0	2	0	0
ENSMUSG00002075933			14	95	0.442105	0	0	0	0	0	0
ENSMUSG00000119763			X	114	0.429825	0	0	0	0	0	0
ENSMUSG00002075935			5	121	0.198347	0	0	0	0	0	0
ENSMUSG00002075936			14	79	0.379747	0	0	0	0	0	0
ENSMUSG00002076301			5	74	0.22973	0	0	0	0	0	0
ENSMUSG00000119588			6	132	0.469697	0	0	0	0	0	0
ENSMUSG00002075939			15	101	0.485149	0	0	0	0	0	0
ENSMUSG00002075940			9	84	0.5	0	0	0	0	0	0
ENSMUSG00001118671			8	92	0.380435	0	0	0	0	0	0
ENSMUSG00002076306			5	95	0.315789	0	0	3	0	0	0
ENSMUSG00002074848			18	96	0.416667	0	0	0	0	0	0
ENSMUSG00002076308			9	107	0.327103	0	0	0	0	0	0
ENSMUSG00002074850			5	117	0.649573	0	0	0	0	0	0
ENSMUSG00002074851			1	53	0.679245	0	0	0	0	0	0
ENSMUSG00002074852			2	167	0.371257	0	0	0	0	0	0
ENSMUSG00002075948			10	263	0.311787	0	0	7	5	0	4
ENSMUSG00002076677			13	114	0.473684	0	0	0	1	0	0
ENSMUSG00002075950			1	77	0.363636	0	0	0	0	0	0
ENSMUSG00002076557			3	106	0.556604	0	0	0	0	0	0
ENSMUSG00002075952			4	96	0.489583	4	5	0	1	7	1
ENSMUSG00002075953			11	69	0.550725	0	0	0	0	0	0
ENSMUSG00002075954			4	95	0.389474	0	0	0	0	0	0
ENSMUSG00002074860			7	121	0.495868	0	0	0	0	0	0
ENSMUSG00002075956			8	75	0.44	0	0	0	0	0	0
ENSMUSG00000118901			12	132	0.484848	0	0	0	0	0	0
ENSMUSG00002074861			5	126	0.626984	0	0	0	0	0	0
ENSMUSG00002076807			2	83	0.373494	3	0	2	0	0	0
ENSMUSG00002075960			2	127	0.433071	0	0	0	0	0	0
ENSMUSG00002074866			7	105	0.542857	0	1	0	0	0	0
ENSMUSG00002076326			11	115	0.6	0	0	0	0	0	0
ENSMUSG00002075963			6	143	0.552448	0	2	1	5	0	1
ENSMUSG00002074868			2	102	0.5	0	0	0	0	0	0
ENSMUSG00002076329			13	144	0.659722	0	0	0	0	0	0
ENSMUSG00000096756			JH584297.1	1446	0.466113	0	0	0	0	0	0
ENSMUSG00002075967			1	110	0.327273	0	0	0	0	0	0
ENSMUSG00002076453			15	60	0.633333	0	0	0	0	0	0
ENSMUSG00002074874			2	67	0.313433	0	0	0	0	0	0
ENSMUSG00002075970			17	81	0.530864	0	0	0	0	0	0
ENSMUSG00002075971			18	84	0.547619	0	0	0	0	0	0
ENSMUSG00002076336			5	111	0.585586	0	0	0	0	1	0
ENSMUSG00002075973			11	80	0.55	0	0	0	0	0	0
ENSMUSG00002074879			11	115	0.313043	0	0	0	0	0	0
ENSMUSG00000119464			8	92	0.380435	0	0	0	0	0	0
ENSMUSG00002076097			2	121	0.471074	0	0	0	0	0	0
ENSMUSG00002075977			X	94	0.542553	0	0	0	0	0	0
ENSMUSG00002075978			15	129	0.534884	0	0	0	0	0	0
ENSMUSG00002075979			7	110	0.609091	0	0	0	0	0	0
ENSMUSG00002075980			1	141	0.64539	0	0	0	0	0	0
ENSMUSG00002075981			16	126	0.603175	0	0	0	0	0	0
ENSMUSG00002075982			8	101	0.267327	0	0	0	0	0	0
ENSMUSG00002076711			17	96	0.677083	0	0	0	0	0	2
ENSMUSG00002076105			1	125	0.576	0	0	0	0	0	0
ENSMUSG00002076470			16	133	0.503759	0	0	0	0	0	0
ENSMUSG00002075986			X	128	0.671875	0	0	0	0	0	0
ENSMUSG00000090395			12	278	0.503597	0	0	0	0	0	0
ENSMUSG00002074893			7	110	0.572727	0	0	0	0	0	0
ENSMUSG00002076110			3	66	0.363636	0	0	0	0	0	0
ENSMUSG00002075990			2	143	0.594406	0	0	0	0	0	0
ENSMUSG00002075991			19	132	0.333333	0	0	0	0	0	0
ENSMUSG00002075992			1	110	0.554545	0	0	0	0	0	0
ENSMUSG00002076357			8	110	0.627273	0	0	0	0	0	0
ENSMUSG00002074898			6	230	0.430435	0	0	0	0	0	0
ENSMUSG00002076359			18	128	0.421875	0	0	0	0	0	0
ENSMUSG00002076724			2	120	0.425	0	0	12	7	0	0
ENSMUSG00002076118			6	97	0.391753	0	0	0	0	0	0
ENSMUSG00000119857			14	132	0.424242	0	0	0	0	0	0
ENSMUSG00002076120			X	110	0.6	0	0	0	0	0	0
ENSMUSG00002076849			2	121	0.396694	0	0	0	0	0	0
ENSMUSG00002076001			12	112	0.294643	0	0	0	0	0	0
ENSMUSG00002076123			3	128	0.453125	0	0	0	0	0	0
ENSMUSG00002076003			9	153	0.163399	0	0	0	0	0	0
ENSMUSG00000095666			JH584296.1	1446	0.465422	0	0	0	0	0	0
ENSMUSG00002076126			13	70	0.442857	0	0	0	0	0	0
ENSMUSG00002076490			10	72	0.333333	0	0	0	0	0	0
ENSMUSG00002076492			15	54	0.666667	0	0	0	0	0	0
ENSMUSG00002076250			12	139	0.460432	0	3	0	0	0	0
ENSMUSG00002076251			15	60	0.633333	0	0	0	0	0	0
ENSMUSG00000119329			X	143	0.475524	0	0	0	0	0	0
ENSMUSG00000119872			3	132	0.492424	0	0	0	0	0	0
ENSMUSG00002076740			9	79	0.493671	0	0	0	0	0	0
ENSMUSG00002076659			X	106	0.669811	0	0	0	0	0	0
ENSMUSG00002076014			2	79	0.468354	0	0	0	0	0	0
ENSMUSG00002076621			3	100	0.28	0	0	0	0	0	1
ENSMUSG00002076016			9	90	0.366667	0	0	0	0	0	0
ENSMUSG00002076017			6	110	0.554545	0	0	0	0	0	0
ENSMUSG00000119525			2	136	0.455882	0	0	0	0	0	0
ENSMUSG00002076140			2	114	0.421053	0	0	0	0	0	0
ENSMUSG00000095500			GL456221.1	291	0.450172	0	0	0	0	0	0
ENSMUSG00002076385			16	84	0.5	0	0	0	0	0	0
ENSMUSG00002076386			3	92	0.413043	0	0	0	0	0	0
ENSMUSG00002076023			6	101	0.49505	0	0	0	0	0	0
ENSMUSG00002076024			11	118	0.491525	0	1	14	0	0	3
ENSMUSG00002076389			17	74	0.554054	1	3	0	3	2	4
ENSMUSG00002076390			7	121	0.495868	0	0	0	0	1	0
ENSMUSG00002076755			6	110	0.509091	0	0	0	0	0	9
ENSMUSG00002076028			8	112	0.142857	0	0	0	0	0	0
ENSMUSG00002076150			7	96	0.4375	0	0	0	0	0	0
ENSMUSG00000118653		ubiquitin-conjugating enzyme E2S (Ube2s) retrogene	9	988	0.574899	17	17	3	5	2	12
ENSMUSG00000118528		novel protein	10	129	0.612403	0	0	0	0	0	0
ENSMUSG00002076517			4	115	0.626087	0	0	0	0	0	0
ENSMUSG00000118657		keratin associated protein 10 like (KRTAP10) pseudogene	4	118	0.59322	0	0	0	0	0	0
ENSMUSG00002076034			17	67	0.656716	0	0	0	0	0	0
ENSMUSG00002076763			19	122	0.557377	0	0	0	0	0	0
ENSMUSG00000118660		novel pseudogene, ortholog of ZNF660	9	990	0.457576	0	0	0	0	0	0
ENSMUSG00000118661		mucin 6, gastric [Source:NCBI gene (formerly Entrezgene);Acc:353328]	7	15593	0.529661	8	2	3	2	4	0
ENSMUSG00002076523			7	121	0.479339	0	0	0	0	0	0
ENSMUSG00002076281			2	170	0.441176	0	5	0	0	0	0
ENSMUSG00002076040			5	132	0.469697	0	0	0	0	0	0
ENSMUSG00002076405			13	249	0.48996	0	0	0	0	0	0
ENSMUSG00002076890			GL456381.1	99	0.505051	0	0	0	0	0	0
ENSMUSG00002076649			15	126	0.309524	0	0	0	1	2	0
ENSMUSG00002076408			15	60	0.616667	0	0	0	0	0	0
ENSMUSG00000119569			X	114	0.403509	0	0	0	0	0	0
ENSMUSG00000094383			JH584299.1	1482	0.469636	0	0	0	0	0	0
ENSMUSG00002076896			11	193	0.544041	0	0	0	0	0	0
ENSMUSG00002076776			6	378	0.5	0	0	0	0	0	0
ENSMUSG00002076049			8	133	0.43609	0	0	0	0	0	0
ENSMUSG00000119932			X	114	0.403509	0	0	0	0	0	0
ENSMUSG00002076172			2	123	0.333333	0	0	0	0	0	0
ENSMUSG00002076900			6	83	0.493976	0	0	0	0	0	0
ENSMUSG00002076093			4	110	0.627273	0	0	0	1	0	0
ENSMUSG00002076054			X	71	0.394366	0	0	0	0	0	0
ENSMUSG00002076297			2	122	0.532787	0	0	0	0	0	0
ENSMUSG00000096244		vomeronasal 1 receptor Vmn1r187 [Source:NCBI gene (formerly Entrezgene);Acc:100039499]	GL456219.1	903	0.433001	0	0	0	0	0	0
ENSMUSG00002076785			2	125	0.576	0	0	0	0	0	0
ENSMUSG00000118555		novel zinc finger pseudogene	7	1816	0.35793	2	1	12	5	1	0
ENSMUSG00002076422			2	124	0.33871	0	0	0	0	0	0
ENSMUSG00002076545			10	193	0.466321	0	0	0	0	0	0
ENSMUSG00002076425			19	109	0.587156	0	0	0	0	0	0
ENSMUSG00002076062			2	95	0.305263	1	2	1	1	0	0
ENSMUSG00002076427			11	173	0.618497	0	0	0	0	0	0
ENSMUSG00002076064			2	95	0.347368	0	0	0	0	2	0
ENSMUSG00002076429			5	96	0.489583	0	0	0	0	0	0
ENSMUSG00000094874			GL456221.1	366	0.483607	0	0	0	0	0	0
ENSMUSG00002076067			8	110	0.609091	0	0	0	0	0	0
ENSMUSG00002076432			8	121	0.479339	0	0	0	0	0	0
ENSMUSG00002076433			14	103	0.417476	0	0	0	0	0	0
ENSMUSG00002076434			16	72	0.569444	0	0	0	0	0	0
ENSMUSG00002076071			9	84	0.261905	0	0	0	0	0	0
ENSMUSG00002076556			11	236	0.504237	0	0	0	0	0	0
ENSMUSG00002076437			2	125	0.584	1	0	0	0	0	0
ENSMUSG00002076074			2	201	0.422886	0	0	0	0	0	1
ENSMUSG00000094887			JH584299.1	2515	0.415507	0	0	0	0	0	0
ENSMUSG00002076197			18	156	0.570513	0	0	4	0	0	0
ENSMUSG00002076441			4	101	0.514851	0	0	0	0	0	0
ENSMUSG00002076806			15	60	0.65	0	0	0	0	0	0
ENSMUSG00000119619			2	136	0.441176	0	0	0	0	0	0
ENSMUSG00002076241			3	110	0.618182	0	0	0	0	0	0
ENSMUSG00002076929			X	169	0.502959	0	0	0	0	0	0
ENSMUSG00002076446			10	93	0.344086	0	0	0	0	0	0
ENSMUSG00002076932			2	68	0.808824	0	0	0	0	0	0
ENSMUSG00000119090			9	132	0.507576	0	0	0	0	0	0
ENSMUSG00000119635			12	132	0.454545	0	0	0	0	0	4
ENSMUSG00002076086			6	186	0.333333	0	1	0	0	0	0
ENSMUSG00000118588		serine (or cysteine) peptidase inhibitor, clade A, member 3G (Serpina3g) pseudogene	12	1170	0.498291	0	0	0	0	0	0
ENSMUSG00002076816			17	135	0.540741	0	0	0	0	3	0
ENSMUSG00002076938			9	115	0.53913	0	0	0	0	0	0
ENSMUSG00002076939			1	176	0.539773	0	0	0	0	0	0
ENSMUSG00000119274			16	132	0.431818	0	0	0	0	0	0
ENSMUSG00002076092			12	85	0.529412	0	0	0	0	0	0
ENSMUSG00002076982			10	108	0.490741	0	0	0	0	0	0
ENSMUSG00002076458			9	76	0.473684	0	0	0	0	0	0
ENSMUSG00002076459			12	115	0.391304	0	0	0	0	0	0
ENSMUSG00000118597		solute carrier organic anion transporter family, member 1b2 (Slco1b2) pseudogene	6	476	0.357143	0	0	0	0	0	0
ENSMUSG00002076218			1	216	0.509259	0	0	0	0	0	0
ENSMUSG00002076947			13	109	0.59633	0	0	1	0	0	0
ENSMUSG00002076099			2	104	0.394231	0	0	0	0	0	0
ENSMUSG00000118600		novel protein	2	99	0.444444	0	0	0	0	0	0
ENSMUSG00002076101			15	111	0.558559	0	0	0	0	0	0
ENSMUSG00002076466			5	74	0.554054	0	0	0	0	0	0
ENSMUSG00002076103			X	91	0.406593	0	0	0	0	0	0
ENSMUSG00000118753			2	132	0.477273	0	0	0	4	12	6
ENSMUSG00002076590			9	104	0.509615	0	0	0	0	0	0
ENSMUSG00002074888			12	72	0.541667	0	0	0	0	0	0
ENSMUSG00002076471			9	130	0.523077	0	0	0	0	0	0
ENSMUSG00002076593			19	79	0.544304	0	0	0	0	0	0
ENSMUSG00002076958			12	65	0.446154	0	0	0	0	0	0
ENSMUSG00000094514			GL456211.1	366	0.415301	0	0	0	0	0	0
ENSMUSG00002076475			1	80	0.575	0	0	0	0	0	0
ENSMUSG00002076112			5	127	0.496063	0	0	0	0	0	0
ENSMUSG00000119487			6	132	0.469697	0	0	0	1	0	0
ENSMUSG00002076114			X	111	0.135135	0	0	0	0	0	0
ENSMUSG00000119133			11	134	0.514925	0	0	0	0	0	0
ENSMUSG00002076116			2	102	0.372549	0	4	0	0	0	0
ENSMUSG00002076481			10	132	0.462121	0	0	0	0	0	0
ENSMUSG00000119855			8	92	0.369565	0	0	0	0	0	0
ENSMUSG00002076846			9	110	0.627273	0	0	0	0	0	0
ENSMUSG00002076887			2	121	0.413223	0	0	0	0	0	0
ENSMUSG00002076606			10	126	0.436508	0	0	0	0	0	0
ENSMUSG00002076243			10	95	0.547368	0	7	0	3	0	3
ENSMUSG00002076244			14	137	0.518248	0	0	0	0	0	0
ENSMUSG00002076124			8	84	0.5	0	0	0	0	0	0
ENSMUSG00002075153			4	82	0.573171	3	1	0	0	1	3
ENSMUSG00000118786			6	132	0.515152	0	0	0	0	0	0
ENSMUSG00002076975			14	124	0.475806	0	0	0	0	0	0
ENSMUSG00002076613			6	105	0.47619	0	0	0	0	0	0
ENSMUSG00002076856			11	104	0.788462	0	0	0	0	0	0
ENSMUSG00000095250			GL456211.1	366	0.480874	0	0	0	0	0	0
ENSMUSG00002076777			6	89	0.831461	0	0	0	0	0	0
ENSMUSG00000119391			3	131	0.465649	0	0	0	0	0	0
ENSMUSG00002076577			2	127	0.393701	0	0	0	0	0	0
ENSMUSG00002076578			4	68	0.602941	6	1	4	13	9	43
ENSMUSG00002076863			10	115	0.452174	0	0	0	0	0	0
ENSMUSG00002076984			11	101	0.465347	0	0	0	0	0	0
ENSMUSG00002076177			3	121	0.495868	0	0	0	0	0	0
ENSMUSG00002076138			13	89	0.550562	0	0	0	0	0	0
ENSMUSG00002076139			8	122	0.52459	0	0	0	0	0	0
ENSMUSG00002076625			8	108	0.407407	0	0	0	0	0	0
ENSMUSG00000118642			17	714	0.684874	0	0	0	1	15	5
ENSMUSG00002076142			9	111	0.630631	0	0	0	0	0	0
ENSMUSG00002076143			X	66	0.545455	0	0	0	0	0	0
ENSMUSG00002076508			15	182	0.565934	0	0	0	0	0	0
ENSMUSG00002076145			11	89	0.314607	2	0	0	0	0	0
ENSMUSG00000094337			GL456354.1	1446	0.462656	0	0	0	0	0	0
ENSMUSG00000118649		defensin beta 119 (Defb119) pseudogene	2	126	0.47619	0	0	0	0	0	0
ENSMUSG00000119733			5	132	0.545455	11	11	8	0	0	1
ENSMUSG00000095041			JH584304.1	4238	0.52336	1309	1407	2302	1537	988	1566
ENSMUSG00000119901			12	132	0.454545	0	0	0	0	0	0
ENSMUSG00000119548			7	132	0.469697	0	0	0	0	0	0
ENSMUSG00002076516			5	117	0.273504	0	0	0	0	0	0
ENSMUSG00002076638			10	96	0.739583	0	0	0	0	0	0
ENSMUSG00000118654		tudor domain containing 10 (TDRD10) pseudogene	3	87	0.517241	0	0	0	0	3	0
ENSMUSG00000095728			JH584298.1	1218	0.484401	0	0	0	0	0	0
ENSMUSG00002076156			8	101	0.49505	0	0	0	0	0	0
ENSMUSG00000119196			14	132	0.477273	0	0	0	0	0	0
ENSMUSG00002076643			13	107	0.672897	0	0	0	0	0	0
ENSMUSG00002076644			18	110	0.627273	0	0	0	0	0	0
ENSMUSG00000117546		TEC	17	2455	0.472505	18	9	9	21	28	16
ENSMUSG00002076889			11	80	0.575	0	0	0	0	0	0
ENSMUSG00002076526			15	60	0.566667	0	0	0	0	0	0
ENSMUSG00000108639		olfactory receptor 1400, pseudogene 1	12	908	0.387665	0	0	0	0	0	0
ENSMUSG00000118905			5	71	0.492958	0	1	6	0	0	1
ENSMUSG00002076165			3	102	0.5	0	0	0	0	0	0
ENSMUSG00002075921			9	128	0.585938	0	0	0	0	0	0
ENSMUSG00000094836			JH584299.1	1080	0.438889	0	0	0	0	0	0
ENSMUSG00002076572			8	88	0.363636	0	0	0	0	0	0
ENSMUSG00002076169			6	141	0.64539	6	4	0	5	10	3
ENSMUSG00000074720			GL456354.1	486	0.436214	0	0	0	0	0	0
ENSMUSG00002074872			8	89	0.370787	0	0	0	0	0	0
ENSMUSG00000117357		translocase of outer mitochondrial membrane 20 (Tomm20) pseudogene	18	1790	0.42514	0	0	0	0	0	0
ENSMUSG00000119573			12	132	0.454545	0	0	0	0	0	0
ENSMUSG00002076739			2	107	0.654206	0	0	0	0	0	0
ENSMUSG00001074846		IQ motif containing F3 [Source:NCBI gene (formerly Entrezgene);Acc:68265]	9	1149	0.497824	0	0	0	0	0	0
ENSMUSG00000094855			JH584299.1	1446	0.473029	0	0	0	0	0	0
ENSMUSG00002076217			12	68	0.544118	0	0	0	0	0	0
ENSMUSG00000119226			2	132	0.424242	0	0	0	0	0	0
ENSMUSG00002076300			11	121	0.487603	0	0	0	0	0	0
ENSMUSG00002076664			11	84	0.488095	0	0	0	0	0	0
ENSMUSG00000119052			16	133	0.496241	0	0	0	0	0	0
ENSMUSG00002076546			X	83	0.421687	1	0	2	0	0	0
ENSMUSG00002076911			10	76	0.592105	0	0	0	0	8	0
ENSMUSG00000118697			10	132	0.484848	0	0	0	0	0	0
ENSMUSG00002076913			16	110	0.618182	0	0	0	0	0	0
ENSMUSG00002076186			6	361	0.559557	0	0	0	0	0	0
ENSMUSG00002076187			11	85	0.282353	0	0	0	0	0	0
ENSMUSG00000118700			15	132	0.454545	0	0	0	0	0	0
ENSMUSG00000119779			8	132	0.431818	0	0	0	0	0	0
ENSMUSG00002076311			13	170	0.441176	0	1	0	1	1	1
ENSMUSG00002075827			13	98	0.591837	0	0	0	0	0	0
ENSMUSG00002076192			7	110	0.627273	0	0	0	0	0	0
ENSMUSG00000118943			9	132	0.431818	0	0	0	0	0	0
ENSMUSG00000119783			9	144	0.493056	0	0	0	0	0	0
ENSMUSG00000118714			2	132	0.439394	0	0	0	0	0	0
ENSMUSG00002076196			13	138	0.666667	0	0	0	0	0	5
ENSMUSG00002076318			6	256	0.492188	2	0	0	0	4	8
ENSMUSG00000119256			3	132	0.462121	0	0	0	0	0	0
ENSMUSG00002076684			X	98	0.408163	0	0	0	0	0	0
ENSMUSG00002076805			4	127	0.480315	0	0	0	0	0	0
ENSMUSG00000118410		zinc finger protein 75a (ZNF75A) pseudogene	16	786	0.428753	5	12	15	15	8	10
ENSMUSG00000119140			3	105	0.485714	0	0	0	0	0	0
ENSMUSG00002076324			7	80	0.4875	0	0	0	0	0	0
ENSMUSG00002076607			X	121	0.495868	0	0	0	0	0	0
ENSMUSG00002076690			12	71	0.492958	0	0	0	0	0	0
ENSMUSG00002076206			6	187	0.620321	73	45	78	42	15	16
ENSMUSG00002076571			13	101	0.247525	0	0	0	0	0	0
ENSMUSG00000118624		discs, large homolog 5 (Drosophila) (Dlg5) pseudogene	14	300	0.476667	0	0	0	0	0	0
ENSMUSG00002076937			3	127	0.511811	0	0	0	0	0	0
ENSMUSG00002076331			16	121	0.479339	0	0	0	0	0	0
ENSMUSG00000094303			JH584297.1	1218	0.469622	0	0	0	0	0	0
ENSMUSG00000119215			2	136	0.448529	0	0	0	0	0	0
ENSMUSG00002076695			12	83	0.650602	3	2	6	0	0	1
ENSMUSG00002076940			8	57	0.684211	0	0	0	0	0	0
ENSMUSG00002076215			7	98	0.438776	0	0	0	0	0	0
ENSMUSG00002076944			2	127	0.393701	0	0	0	0	0	0
ENSMUSG00002076337			2	127	0.409449	0	0	1	0	0	0
ENSMUSG00002076824			13	126	0.571429	0	0	0	0	0	0
ENSMUSG00002076704			13	109	0.59633	0	0	0	0	0	0
ENSMUSG00002076220			19	109	0.321101	0	0	0	0	0	0
ENSMUSG00002076583			2	123	0.504065	0	0	0	0	0	0
ENSMUSG00002076586			12	98	0.265306	0	0	0	0	0	0
ENSMUSG00000118925			13	133	0.43609	0	2	0	0	0	0
ENSMUSG00002076224			15	105	0.361905	0	0	0	0	0	0
ENSMUSG00002076467			10	67	0.38806	0	0	1	0	0	0
ENSMUSG00002074887			14	121	0.495868	0	0	0	0	0	0
ENSMUSG00002076469			2	64	0.546875	0	0	0	0	0	0
ENSMUSG00000079222			GL456221.1	1205	0.453112	0	0	0	0	0	1
ENSMUSG00002076714			9	105	0.561905	0	0	0	0	0	0
ENSMUSG00002076715			10	129	0.387597	0	0	0	0	0	0
ENSMUSG00002076716			12	70	0.571429	0	0	0	0	0	0
ENSMUSG00000119485			9	72	0.430556	0	0	0	0	0	0
ENSMUSG00002076637			6	125	0.704	0	0	0	0	0	0
ENSMUSG00002076476			17	126	0.587302	0	0	0	0	0	0
ENSMUSG00000118946			7	132	0.44697	0	0	0	0	0	0
ENSMUSG00002076236			1	102	0.5	0	0	0	0	0	0
ENSMUSG00002076237			6	466	0.55794	55	17	54	18	10	11
ENSMUSG00002076965			10	204	0.382353	0	0	0	0	0	0
ENSMUSG00000118659		novel transcript	3	737	0.443691	0	0	0	0	0	0
ENSMUSG00002076561			8	58	0.37931	0	0	0	0	0	0
ENSMUSG00002074859			5	89	0.41573	0	0	0	2	1	0
ENSMUSG00002076645			16	60	0.533333	0	0	0	0	0	0
ENSMUSG00002076970			3	138	0.173913	0	0	0	0	0	0
ENSMUSG00000119029			16	132	0.5	0	0	0	0	0	0
ENSMUSG00002076245			14	168	0.589286	0	0	0	0	0	0
ENSMUSG00002076488			15	109	0.623853	0	0	0	0	0	0
ENSMUSG00000118625		polycystic kidney disease 2 (Pkd2) pseudogene	5	475	0.364211	5	19	1	6	21	4
ENSMUSG00000115115		novel protein	4	78	0.564103	0	0	0	0	0	0
ENSMUSG00000119150			11	132	0.477273	0	0	0	0	0	0
ENSMUSG00000118627		IMP3, U3 small nucleolar ribonucleoprotein, homolog (yeast) (Imp3) pseudogene	5	544	0.617647	0	0	0	0	0	0
ENSMUSG00000119270			5	123	0.479675	0	0	0	2	0	0
ENSMUSG00002076817			16	106	0.349057	0	0	0	0	0	0
ENSMUSG00002076266			9	121	0.495868	0	0	0	0	0	0
ENSMUSG00000095763			JH584299.1	1446	0.464039	0	0	0	0	0	0
ENSMUSG00002076699			2	125	0.688	0	0	0	0	0	0
ENSMUSG00002076620			8	104	0.615385	0	0	0	0	0	0
ENSMUSG00002076942			2	121	0.429752	0	0	0	0	0	0
ENSMUSG00001118660			6	129	0.488372	0	0	0	0	0	0
ENSMUSG00002076987			12	110	0.572727	0	0	0	0	0	0
ENSMUSG00002076624			5	106	0.613208	0	0	0	0	0	0
ENSMUSG00000095019			JH584303.1	1083	0.430286	0	0	0	0	0	0
ENSMUSG00002076990			11	135	0.666667	0	0	0	0	0	0
ENSMUSG00000094791			JH584299.1	837	0.467145	0	0	0	0	0	0
ENSMUSG00000091585			JH584299.1	1500	0.468667	0	0	0	0	0	0
ENSMUSG00000118999			12	132	0.484848	0	0	0	0	0	0
ENSMUSG00002076683			8	109	0.669725	2	1	10	5	7	5
ENSMUSG00000118396		IQ motif containing F3 [Source:NCBI gene (formerly Entrezgene);Acc:68265]	9	2668	0.504498	0	0	0	1	0	0
ENSMUSG00000119355			11	134	0.507463	0	0	0	0	0	0
ENSMUSG00000119544			19	93	0.419355	0	0	0	0	0	0
ENSMUSG00000094799			GL456210.1	366	0.486339	0	0	0	0	0	0
ENSMUSG00000118650		zinc finger protein 445 (Zfp44) pseudogene	X	417	0.484412	0	0	0	0	0	0
ENSMUSG00002076878			9	88	0.761364	0	0	0	0	0	0
ENSMUSG00002074853			1	140	0.485714	0	0	0	0	3	4
ENSMUSG00002076759			8	84	0.5	0	0	0	0	0	0
ENSMUSG00000096680			JH584296.1	1443	0.47124	0	0	0	0	0	0
ENSMUSG00002076761			13	110	0.618182	0	0	0	0	0	0
ENSMUSG00000090765			12	294	0.455782	0	0	0	0	0	0
ENSMUSG00000095523			JH584299.1	1446	0.464039	0	0	0	0	0	0
ENSMUSG00000119804			14	105	0.457143	0	0	0	0	0	0
ENSMUSG00000119737			13	133	0.43609	0	0	0	0	0	0
ENSMUSG00002074858			13	113	0.39823	0	0	0	0	0	0
ENSMUSG00002076672			5	126	0.579365	0	0	0	0	0	0
ENSMUSG00002076647			2	126	0.587302	0	0	1	0	0	2
ENSMUSG00002076310			13	110	0.427273	0	0	0	0	0	0
ENSMUSG00002076810			1	121	0.495868	0	0	0	0	0	0
ENSMUSG00002076286			12	160	0.55	0	0	0	0	0	0
ENSMUSG00002076772			11	99	0.454545	6	0	0	0	0	0
ENSMUSG00000117965		novel protein	10	204	0.490196	0	0	0	0	0	0
ENSMUSG00002076814			8	143	0.524476	0	0	0	4	3	4
ENSMUSG00000119093			2	132	0.431818	0	0	0	0	0	0
ENSMUSG00000119806			2	136	0.441176	0	0	0	0	0	0
ENSMUSG00002076830			11	146	0.30137	0	0	0	0	0	0
ENSMUSG00002076548			6	110	0.409091	0	0	0	0	0	0
ENSMUSG00002076307			7	70	0.6	0	0	0	0	0	0
ENSMUSG00002076953			9	95	0.473684	0	0	0	0	0	0
ENSMUSG00002076457			9	107	0.420561	0	0	0	0	0	0
ENSMUSG00000119858			5	132	0.409091	0	0	0	0	0	0
ENSMUSG00002076338			15	60	0.566667	0	0	0	0	0	0
ENSMUSG00002076541			10	89	0.382022	0	0	0	0	0	0
ENSMUSG00002076906			18	111	0.153153	8	2	4	6	3	0
ENSMUSG00002076341			6	97	0.494845	0	0	0	0	0	0
ENSMUSG00002075693			16	102	0.460784	0	0	0	0	0	2
ENSMUSG00002076667			2	127	0.401575	0	0	1	0	0	0
ENSMUSG00002076789			3	110	0.627273	0	0	0	0	0	0
ENSMUSG00002076924			7	154	0.357143	0	0	0	0	0	0
ENSMUSG00000119491			9	72	0.402778	0	0	0	0	0	0
ENSMUSG00000119291			9	132	0.454545	0	0	0	0	0	0
ENSMUSG00000117901		novel transcript, antisense to Macrod1	19	953	0.529906	44	36	53	224	127	167
ENSMUSG00002076309			16	78	0.5	0	0	0	0	0	0
ENSMUSG00002076941			5	83	0.385542	0	0	0	0	0	0
ENSMUSG00002076796			7	96	0.34375	0	0	0	0	0	0
ENSMUSG00002076676			13	110	0.627273	0	0	0	0	0	0
ENSMUSG00000119128			3	85	0.423529	0	0	0	0	0	0
ENSMUSG00002076839			6	204	0.568627	0	0	0	0	0	0
ENSMUSG00002076920			Y	60	0.533333	0	0	0	0	0	0
ENSMUSG00002076191			12	205	0.55122	0	0	0	0	0	0
ENSMUSG00002076317			2	77	0.272727	0	0	0	0	0	0
ENSMUSG00002076246			7	96	0.53125	0	0	0	0	0	0
ENSMUSG00000119268			13	132	0.44697	0	0	0	0	0	0
ENSMUSG00000119846			2	132	0.44697	0	0	0	0	0	0
ENSMUSG00000119192			3	130	0.507692	0	0	0	0	0	0
ENSMUSG00000105705		anaphase-promoting complex subunit 5 pseudogene	5	1107	0.506775	0	0	0	0	0	0
ENSMUSG00000119662			11	144	0.506944	0	0	0	0	0	0
ENSMUSG00000119666			9	72	0.416667	0	0	0	0	0	0
ENSMUSG00000118777			3	131	0.442748	0	0	0	0	0	0
ENSMUSG00000119445			3	130	0.5	0	0	0	0	0	0
ENSMUSG00002076691			10	80	0.4375	0	0	0	0	0	0
ENSMUSG00002076852			19	152	0.592105	0	0	0	0	0	0
ENSMUSG00002076973			15	175	0.445714	0	0	0	0	0	0
ENSMUSG00002076854			6	80	0.4125	0	0	0	0	0	0
ENSMUSG00002076465			11	96	0.510417	0	0	0	0	0	0
ENSMUSG00002076870			15	157	0.477707	0	0	0	0	0	1
ENSMUSG00000095787			GL456211.1	372	0.502688	0	0	0	0	0	0
ENSMUSG00000079808			GL456212.1	1910	0.496859	0	0	0	0	0	1
ENSMUSG00002076751			5	99	0.505051	0	0	0	0	1	0
ENSMUSG00000119179			6	132	0.431818	0	0	0	1	0	6
ENSMUSG00002076753			2	123	0.333333	0	0	0	0	0	0
ENSMUSG00002076943			16	74	0.527027	0	0	0	0	0	0
ENSMUSG00002076581			3	67	0.38806	1	0	0	0	0	1
ENSMUSG00000117238		novel transcript	7	7600	0.405395	2	3	0	3	0	1
ENSMUSG00002076745			15	129	0.604651	0	0	0	0	0	0
ENSMUSG00002076463			11	111	0.576577	14	5	22	0	13	4
ENSMUSG00002076343			10	110	0.609091	0	0	0	0	0	0
ENSMUSG00002076721			7	195	0.584615	1	0	1	2	0	0
ENSMUSG00000096808			GL456221.1	1500	0.382667	0	0	0	3	0	0
ENSMUSG00002076398			1	124	0.572581	0	0	0	0	0	0
ENSMUSG00002076802			11	80	0.5375	0	0	7	0	0	0
ENSMUSG00002074884			12	60	0.666667	0	0	0	0	0	0
ENSMUSG00000079800			GL456210.1	1271	0.461054	0	0	0	0	0	0
ENSMUSG00002076912			12	115	0.286957	0	0	0	8	0	0
ENSMUSG00000119005			14	132	0.416667	0	0	0	0	0	0
ENSMUSG00002076674			17	145	0.57931	0	0	4	0	0	0
ENSMUSG00002076797			6	151	0.437086	1	1	1	2	0	0
ENSMUSG00000118652		novel transcript	13	358	0.513966	0	0	0	0	0	0
ENSMUSG00002076718			7	121	0.479339	0	0	0	0	0	0
ENSMUSG00002076650			11	216	0.527778	0	0	0	0	0	0
ENSMUSG00002076935			13	70	0.442857	0	0	0	0	0	0
ENSMUSG00002076934			2	110	0.572727	0	0	0	0	0	0
ENSMUSG00002076909			8	69	0.492754	0	0	0	0	0	0
ENSMUSG00000119114			6	56	0.5	0	0	0	0	0	0
ENSMUSG00002076949			10	95	0.505263	0	0	0	0	0	0
ENSMUSG00002074883			19	115	0.4	0	0	0	0	0	0
ENSMUSG00000118744			5	71	0.492958	0	8	0	0	0	0
ENSMUSG00000096728			GL456354.1	1446	0.482019	0	0	0	0	0	0
ENSMUSG00002074875			10	214	0.462617	0	0	0	0	0	0
ENSMUSG00000119144			4	83	0.481928	2	3	8	5	10	14
ENSMUSG00002076609			10	137	0.452555	0	0	0	0	0	0
ENSMUSG00002076529			6	109	0.642202	0	0	0	0	0	0
ENSMUSG00000119884			8	132	0.5	0	0	0	0	0	0
ENSMUSG00002076867			13	83	0.361446	0	0	0	0	0	0
ENSMUSG00000118641		Zinc finger protein 974 (Zfp974) pseudogene	7	57	0.403509	0	0	0	0	0	4
ENSMUSG00000118513		renalase, FAD-dependent amine oxidase (Rnls) pseudogene	19	350	0.491429	0	0	0	0	0	0
ENSMUSG00002076793			10	101	0.49505	0	0	0	0	0	0
ENSMUSG00002076478			14	91	0.373626	0	0	0	0	0	0
ENSMUSG00000119191			10	132	0.530303	0	0	0	0	0	0
ENSMUSG00002076948			12	100	0.59	0	0	0	4	0	4
ENSMUSG00002076905			5	83	0.421687	0	0	0	0	0	0
ENSMUSG00002076431			15	129	0.573643	0	0	0	5	0	0
ENSMUSG00000119649			4	83	0.481928	18	7	13	11	6	8
ENSMUSG00002074878			17	109	0.633028	0	0	0	0	0	0
ENSMUSG00000094054			GL456211.1	891	0.484848	0	0	0	0	0	0
ENSMUSG00002076880			8	91	0.417582	0	0	0	0	0	0
ENSMUSG00002076866			3	117	0.512821	0	0	0	0	0	0
ENSMUSG00002076518			6	128	0.648438	0	0	0	0	0	0
ENSMUSG00002076794			2	102	0.5	0	0	0	0	0	0
ENSMUSG00002076831			6	59	0.694915	0	0	0	0	0	0
ENSMUSG00000118647		calmodulin-like 6 (CALML6) pseudogene	4	224	0.517857	0	0	0	0	0	0
ENSMUSG00002076673			2	77	0.532468	0	0	0	0	0	0
ENSMUSG00002076584			17	125	0.592	0	0	0	0	0	0
ENSMUSG00000119610			15	132	0.469697	0	0	0	4	0	0
ENSMUSG00002076812			X	102	0.5	0	0	0	0	0	0
ENSMUSG00000115798		novel protein	15	213	0.549296	0	0	0	0	0	0
ENSMUSG00000118645			6	480	0.49375	0	0	0	0	0	0
ENSMUSG00000119068			16	132	0.477273	0	0	0	0	0	0
ENSMUSG00000119087			6	132	0.477273	0	0	0	0	0	0
ENSMUSG00000119001			15	132	0.515152	0	0	0	0	0	0
ENSMUSG00002076851			X	95	0.505263	1	0	8	0	2	0
ENSMUSG00000118644		sperm antigen with calponin homology and coiled-coil domains 1 (Specc1) pseudogene	11	133	0.518797	1	1	0	7	0	1
ENSMUSG00000079794			GL456210.1	255	0.470588	0	0	0	0	0	0
ENSMUSG00002076595			13	110	0.409091	0	0	0	0	0	0
ENSMUSG00002076872			4	76	0.671053	0	0	0	0	0	0
ENSMUSG00000119065			11	132	0.424242	0	0	0	0	1	0
ENSMUSG00002076967			3	138	0.637681	0	0	0	0	0	0
ENSMUSG00000109644	0610005C13Rik	RIKEN cDNA 0610005C13 gene [Source:MGI Symbol;Acc:MGI:1918911]	7	3583	0.538934	1	0	0	17	0	4
ENSMUSG00000108652	0610006L08Rik	RIKEN cDNA 0610006L08 gene [Source:MGI Symbol;Acc:MGI:1923503]	7	2128	0.443609	2	1	0	3	0	0
ENSMUSG00000007777	0610009B22Rik	RIKEN cDNA 0610009B22 gene [Source:MGI Symbol;Acc:MGI:1913300]	11	998	0.460922	35	47	34	30	15	22
ENSMUSG00000086714	0610009E02Rik	RIKEN cDNA 0610009E02 gene [Source:MGI Symbol;Acc:MGI:3698435]	2	1803	0.501387	11	3	18	5	5	13
ENSMUSG00000043644	0610009L18Rik	RIKEN cDNA 0610009L18 gene [Source:MGI Symbol;Acc:MGI:1914088]	11	619	0.602585	24	16	14	27	6	12
ENSMUSG00000042208	0610010F05Rik	RIKEN cDNA 0610010F05 gene [Source:MGI Symbol;Acc:MGI:1918925]	11	5226	0.410065	122	105	240	222	135	111
ENSMUSG00000020831	0610010K14Rik	RIKEN cDNA 0610010K14 gene [Source:MGI Symbol;Acc:MGI:1915609]	11	1896	0.55538	0	0	1	1	0	0
ENSMUSG00000089755	0610012D04Rik	RIKEN cDNA 0610012D04 gene [Source:MGI Symbol;Acc:MGI:1918926]	17	531	0.478343	0	0	0	4	0	0
ENSMUSG00000107002	0610012G03Rik	RIKEN cDNA 0610012G03 gene [Source:MGI Symbol;Acc:MGI:1913301]	16	1445	0.545329	125	126	63	84	73	95
ENSMUSG00000046683	0610025J13Rik	RIKEN cDNA 0610025J13 gene [Source:MGI Symbol;Acc:MGI:1915618]	4	1121	0.508475	0	0	3	0	0	0
ENSMUSG00000058706	0610030E20Rik	RIKEN cDNA 0610030E20 gene [Source:MGI Symbol;Acc:MGI:1915614]	6	5832	0.48011	214	155	238	188	134	135
ENSMUSG00000099146	0610031O16Rik	RIKEN cDNA 0610031O16 gene [Source:MGI Symbol;Acc:MGI:1915619]	3	2482	0.463739	0	0	0	0	0	0
ENSMUSG00000108236	0610033M10Rik	RIKEN cDNA 0610033M10 gene [Source:MGI Symbol;Acc:MGI:1921343]	6	1102	0.490926	0	1	0	3	0	0
ENSMUSG00000097882	0610038B21Rik	RIKEN cDNA 0610038B21 gene [Source:MGI Symbol;Acc:MGI:1917595]	8	3071	0.552589	19	2	17	8	2	9
ENSMUSG00000058812	0610039K10Rik	RIKEN cDNA 0610039K10 gene [Source:MGI Symbol;Acc:MGI:1915636]	2	952	0.584034	0	0	7	0	0	0
ENSMUSG00000089889	0610040B10Rik	RIKEN cDNA 0610040B10 gene [Source:MGI Symbol;Acc:MGI:1914922]	5	2098	0.461392	8	1	9	12	3	10
ENSMUSG00000087341	0610040F04Rik	RIKEN cDNA 0610040F04 gene [Source:MGI Symbol;Acc:MGI:1922644]	6	2150	0.47814	4	5	3	18	11	7
ENSMUSG00000060512	0610040J01Rik	RIKEN cDNA 0610040J01 gene [Source:MGI Symbol;Acc:MGI:1923511]	5	2403	0.54432	7	0	14	22	20	18
ENSMUSG00000087361	0610043K17Rik	RIKEN cDNA 0610043K17 gene [Source:MGI Symbol;Acc:MGI:1915650]	4	770	0.431169	10	6	14	35	3	0
ENSMUSG00000114511	0710001A04Rik	RIKEN cDNA 0710001A04 gene [Source:MGI Symbol;Acc:MGI:1915652]	18	1345	0.437918	0	0	0	0	0	0
ENSMUSG00000097863	1010001B22Rik	RIKEN cDNA 1010001B22 gene [Source:MGI Symbol;Acc:MGI:1922653]	5	589	0.55348	0	4	2	3	6	16
ENSMUSG00000115547	1100001I12Rik	RIKEN cDNA 1100001I12 gene [Source:MGI Symbol;Acc:MGI:1922655]	15	672	0.403274	0	0	5	4	0	0
ENSMUSG00000090066	1110002E22Rik	RIKEN cDNA 1110002E22 gene [Source:MGI Symbol;Acc:MGI:1915066]	3	9998	0.4999	44	24	52	8	41	20
ENSMUSG00000097134	1110002J07Rik	RIKEN cDNA 1110002J07 gene [Source:MGI Symbol;Acc:MGI:1915738]	10	2513	0.475925	1	3	1	8	4	0
ENSMUSG00000071456	1110002L01Rik	RIKEN cDNA 1110002L01 gene [Source:MGI Symbol;Acc:MGI:1915821]	12	4131	0.468168	202	102	237	166	66	119
ENSMUSG00000102531	1110002O04Rik	RIKEN cDNA 1110002O04 gene [Source:MGI Symbol;Acc:MGI:1915733]	1	566	0.512367	0	0	0	3	0	3
ENSMUSG00000106291	1110003F10Rik	RIKEN cDNA 1110003F10 gene [Source:MGI Symbol;Acc:MGI:1915726]	5	767	0.418514	4	0	11	6	0	2
ENSMUSG00000030663	1110004F10Rik	RIKEN cDNA 1110004F10 gene [Source:MGI Symbol;Acc:MGI:1929274]	7	2490	0.473092	777	793	820	858	725	919
ENSMUSG00000107121	1110006O24Rik	RIKEN cDNA 1110006O24 gene [Source:MGI Symbol;Acc:MGI:1913373]	5	768	0.59375	1	5	1	1	2	6
ENSMUSG00000046119	1110008E08Rik	RIKEN cDNA 1110008E08 gene [Source:MGI Symbol;Acc:MGI:1915750]	16	723	0.521438	0	0	0	0	0	2
ENSMUSG00000039195	1110008P14Rik	RIKEN cDNA 1110008P14 gene [Source:MGI Symbol;Acc:MGI:1920987]	2	2694	0.577209	83	74	115	86	99	45
ENSMUSG00000116164	1110013H19Rik	RIKEN cDNA 1110013H19 gene [Source:MGI Symbol;Acc:MGI:1915772]	15	671	0.502235	9	9	0	2	0	1
ENSMUSG00000098659	1110015O18Rik	RIKEN cDNA 1110015O18 gene [Source:MGI Symbol;Acc:MGI:1915766]	3	2035	0.335135	1	4	1	0	0	0
ENSMUSG00000028441	1110017D15Rik	RIKEN cDNA 1110017D15 gene [Source:MGI Symbol;Acc:MGI:1920971]	4	1421	0.546094	1	0	2	0	0	1
ENSMUSG00000085151	1110018N20Rik	RIKEN cDNA 1110018N20 gene [Source:MGI Symbol;Acc:MGI:1915753]	2	1579	0.51425	42	41	117	55	12	7
ENSMUSG00000112289	1110019B22Rik	RIKEN cDNA 1110019B22 gene [Source:MGI Symbol;Acc:MGI:1915779]	10	1000	0.525	0	0	0	0	0	0
ENSMUSG00000097616	1110019D14Rik	RIKEN cDNA 1110019D14 gene [Source:MGI Symbol;Acc:MGI:1923561]	6	1734	0.393887	9	8	35	15	23	26
ENSMUSG00000097047	1110020A21Rik	RIKEN cDNA 1110020A21 gene [Source:MGI Symbol;Acc:MGI:1915781]	17	1272	0.478774	12	1	13	7	7	4
ENSMUSG00000068073	1110025L11Rik	RIKEN cDNA 1110025L11 gene [Source:MGI Symbol;Acc:MGI:1915887]	16	591	0.467005	0	0	0	0	0	0
ENSMUSG00000103520	1110025M09Rik	RIKEN cDNA 1110025M09 gene [Source:MGI Symbol;Acc:MGI:1915885]	15	855	0.419883	3	4	3	10	13	3
ENSMUSG00000085972	1110028F11Rik	RIKEN cDNA 1110028F11 gene [Source:MGI Symbol;Acc:MGI:1915940]	11	976	0.484631	11	0	5	8	5	1
ENSMUSG00000099139	1110028F18Rik	RIKEN cDNA 1110028F18 gene [Source:MGI Symbol;Acc:MGI:1915942]	8	1341	0.489933	0	0	0	0	1	0
ENSMUSG00000037971	1110032A03Rik	RIKEN cDNA 1110032A03 gene [Source:MGI Symbol;Acc:MGI:1915971]	9	5293	0.47799	93	77	69	134	102	123
ENSMUSG00000046999	1110032F04Rik	RIKEN cDNA 1110032F04 gene [Source:MGI Symbol;Acc:MGI:1915975]	3	2578	0.529868	0	0	5	0	0	0
ENSMUSG00000099098	1110035H17Rik	RIKEN cDNA 1110035H17 gene [Source:MGI Symbol;Acc:MGI:1915936]	7	1241	0.591459	2	0	0	1	0	0
ENSMUSG00000092203	1110038B12Rik	RIKEN cDNA 1110038B12 gene [Source:MGI Symbol;Acc:MGI:1916013]	17	1811	0.503589	66	80	60	39	20	21
ENSMUSG00000063236	1110038F14Rik	RIKEN cDNA 1110038F14 gene [Source:MGI Symbol;Acc:MGI:2152337]	15	1916	0.530793	152	99	171	173	121	149
ENSMUSG00000085457	1110046J04Rik	RIKEN cDNA 1110046J04 gene [Source:MGI Symbol;Acc:MGI:1916058]	13	3487	0.454259	19	23	21	32	62	10
ENSMUSG00000040591	1110051M20Rik	RIKEN cDNA 1110051M20 gene [Source:MGI Symbol;Acc:MGI:1915079]	2	5202	0.517686	387	303	361	433	380	341
ENSMUSG00000068067	1110057P08Rik	RIKEN cDNA 1110057P08 gene [Source:MGI Symbol;Acc:MGI:1916094]	16	465	0.408602	0	0	0	0	0	0
ENSMUSG00000035171	1110059E24Rik	RIKEN cDNA 1110059E24 gene [Source:MGI Symbol;Acc:MGI:1913456]	19	3067	0.43267	49	25	83	83	55	82
ENSMUSG00000032551	1110059G10Rik	RIKEN cDNA 1110059G10 gene [Source:MGI Symbol;Acc:MGI:1913452]	9	5594	0.415445	25	53	27	30	16	54
ENSMUSG00000105036	1110060G06Rik	RIKEN cDNA 1110060G06 gene [Source:MGI Symbol;Acc:MGI:1916064]	5	499	0.380762	5	1	0	0	0	0
ENSMUSG00000078570	1110065P20Rik	RIKEN cDNA 1110065P20 gene [Source:MGI Symbol;Acc:MGI:1916170]	4	2069	0.611406	69	56	76	63	61	66
ENSMUSG00000111857	1190001M18Rik	RIKEN cDNA 1190001M18 gene [Source:MGI Symbol;Acc:MGI:1916174]	11	1270	0.444094	1	0	0	1	0	0
ENSMUSG00000043687	1190005I06Rik	RIKEN cDNA 1190005I06 gene [Source:MGI Symbol;Acc:MGI:1916168]	8	1083	0.648199	1	3	3	10	9	1
ENSMUSG00000063320	1190007I07Rik	RIKEN cDNA 1190007I07 gene [Source:MGI Symbol;Acc:MGI:3698433]	10	1197	0.519632	21	14	17	23	20	9
ENSMUSG00000110013	1190028D05Rik	RIKEN cDNA 1190028D05 gene [Source:MGI Symbol;Acc:MGI:3036227]	8	763	0.40367	0	0	0	0	0	0
ENSMUSG00000087684	1200007C13Rik	RIKEN cDNA 1200007C13 gene [Source:MGI Symbol;Acc:MGI:1921369]	2	2455	0.562118	81	43	49	449	447	356
ENSMUSG00000097290	1300002E11Rik	RIKEN cDNA 1300002E11 gene [Source:MGI Symbol;Acc:MGI:1919001]	16	4213	0.43342	136	123	191	138	112	145
ENSMUSG00000112545	1300014J16Rik	RIKEN cDNA 1300014J16 gene [Source:MGI Symbol;Acc:MGI:1921410]	12	1337	0.513089	12	2	4	13	1	16
ENSMUSG00000033688	1300017J02Rik	RIKEN cDNA 1300017J02 gene [Source:MGI Symbol;Acc:MGI:1919025]	9	4508	0.502884	15	11	2	10	2	17
ENSMUSG00000096221	1500002C15Rik	RIKEN cDNA 1500002C15 gene [Source:MGI Symbol;Acc:MGI:1916196]	4	2183	0.51443	8	9	8	15	21	18
ENSMUSG00000097595	1500002F19Rik	RIKEN cDNA 1500002F19 gene [Source:MGI Symbol;Acc:MGI:1923933]	7	1239	0.51816	3	6	20	5	23	9
ENSMUSG00000098912	1500004A13Rik	RIKEN cDNA 1500004A13 gene [Source:MGI Symbol;Acc:MGI:2442808]	3	13854	0.476036	74	62	98	117	61	105
ENSMUSG00000104888	1500005C15Rik	RIKEN cDNA 1500005C15 gene [Source:MGI Symbol;Acc:MGI:1919269]	3	2394	0.458647	1	9	13	16	39	4
ENSMUSG00000068099	1500009C09Rik	RIKEN cDNA 1500009C09 gene [Source:MGI Symbol;Acc:MGI:1923755]	15	1904	0.550945	40	12	32	38	5	19
ENSMUSG00000087651	1500009L16Rik	RIKEN cDNA 1500009L16 gene [Source:MGI Symbol;Acc:MGI:1917034]	10	3465	0.464646	17	16	48	13	10	3
ENSMUSG00000072694	1500011B03Rik	RIKEN cDNA 1500011B03 gene [Source:MGI Symbol;Acc:MGI:1913486]	5	2693	0.502785	231	214	222	266	157	226
ENSMUSG00000097247	1500012K07Rik	RIKEN cDNA 1500012K07 gene [Source:MGI Symbol;Acc:MGI:1916204]	7	2630	0.437643	3	7	9	1	3	9
ENSMUSG00000098702	1500015A07Rik	RIKEN cDNA 1500015A07 gene [Source:MGI Symbol;Acc:MGI:1916232]	18	2296	0.47169	74	44	25	31	45	28
ENSMUSG00000094732	1500015L24Rik	RIKEN cDNA 1500015L24 gene [Source:MGI Symbol;Acc:MGI:1916244]	19	2743	0.423259	4	10	1	9	18	24
ENSMUSG00000097383	1500026H17Rik	RIKEN cDNA 1500026H17 gene [Source:MGI Symbol;Acc:MGI:1916252]	10	3027	0.428807	9	7	5	1	7	10
ENSMUSG00000117718	1500032F14Rik	RIKEN cDNA 1500032F14 gene [Source:MGI Symbol;Acc:MGI:1925555]	19	460	0.541304	0	0	0	0	0	0
ENSMUSG00000059631	1500035N22Rik	RIKEN cDNA 1500035N22 gene [Source:MGI Symbol;Acc:MGI:1917508]	5	865	0.477457	0	1	3	0	0	0
ENSMUSG00000043747	1520401A03Rik	RIKEN cDNA 1520401A03 gene [Source:MGI Symbol;Acc:MGI:2443785]	17	4111	0.542934	14	2	19	9	3	3
ENSMUSG00000117232	1600002D24Rik	RIKEN cDNA 1600002D24 gene [Source:MGI Symbol;Acc:MGI:1917026]	16	2822	0.506733	0	0	0	4	0	2
ENSMUSG00000101585	1600010M07Rik	RIKEN cDNA 1600010M07 gene [Source:MGI Symbol;Acc:MGI:1917031]	7	1729	0.463274	0	8	0	0	0	2
ENSMUSG00000050088	1600012H06Rik	RIKEN cDNA 1600012H06 gene [Source:MGI Symbol;Acc:MGI:1915162]	17	3294	0.440498	111	122	121	99	107	143
ENSMUSG00000047661	1600012P17Rik	RIKEN cDNA 1600012P17 gene [Source:MGI Symbol;Acc:MGI:1919275]	1	2592	0.430556	0	0	0	0	0	0
ENSMUSG00000054676	1600014C10Rik	RIKEN cDNA 1600014C10 gene [Source:MGI Symbol;Acc:MGI:1919494]	7	3948	0.509878	28	17	44	57	21	40
ENSMUSG00000094690	1600014C23Rik	RIKEN cDNA 1600014C23 gene [Source:MGI Symbol;Acc:MGI:1919490]	17	518	0.523166	26	11	27	3	14	0
ENSMUSG00000102505	1600017P15Rik	RIKEN cDNA 1600017P15 gene [Source:MGI Symbol;Acc:MGI:1920499]	3	890	0.568539	3	0	8	0	0	0
ENSMUSG00000099429	1600019K03Rik	RIKEN cDNA 1600019K03 gene [Source:MGI Symbol;Acc:MGI:1917018]	16	477	0.469602	0	0	0	0	0	0
ENSMUSG00000097048	1600020E01Rik	RIKEN cDNA 1600020E01 gene [Source:MGI Symbol;Acc:MGI:1919262]	6	4328	0.503466	247	259	404	259	189	139
ENSMUSG00000117315	1600022D10Rik	RIKEN cDNA 1600022D10 gene [Source:MGI Symbol;Acc:MGI:1920502]	17	1562	0.419974	0	1	0	4	0	2
ENSMUSG00000104986	1600023N17Rik	RIKEN cDNA 1600023N17 gene [Source:MGI Symbol;Acc:MGI:1917038]	5	1007	0.496524	0	2	1	5	2	2
ENSMUSG00000085114	1600025M17Rik	RIKEN cDNA 1600025M17 gene [Source:MGI Symbol;Acc:MGI:1919280]	X	1071	0.438842	0	0	0	0	0	0
ENSMUSG00000110340	1600027J07Rik	RIKEN cDNA 1600027J07 gene [Source:MGI Symbol;Acc:MGI:1917044]	8	489	0.453988	0	0	0	6	4	1
ENSMUSG00000057818	1600029O15Rik	RIKEN cDNA 1600029O15 gene [Source:MGI Symbol;Acc:MGI:3045362]	9	1809	0.464898	3	0	0	6	0	0
ENSMUSG00000047150	1700001C19Rik	RIKEN cDNA 1700001C19 gene [Source:MGI Symbol;Acc:MGI:1922712]	17	1896	0.518987	0	0	0	0	0	0
ENSMUSG00000099419	1700001D01Rik	RIKEN cDNA 1700001D01 gene [Source:MGI Symbol;Acc:MGI:1916529]	8	565	0.472566	0	0	1	0	2	0
ENSMUSG00000095384	1700001F09Rik	RIKEN cDNA 1700001F09 gene [Source:MGI Symbol;Acc:MGI:1919076]	14	884	0.397059	0	1	0	0	0	4
ENSMUSG00000087170	1700001G01Rik	RIKEN cDNA 1700001G01 gene [Source:MGI Symbol;Acc:MGI:1922683]	18	2249	0.425078	0	0	0	0	0	0
ENSMUSG00000085984	1700001G11Rik	RIKEN cDNA 1700001G11 gene [Source:MGI Symbol;Acc:MGI:1916553]	14	1080	0.533333	0	1	2	2	0	0
ENSMUSG00000103746	1700001G17Rik	RIKEN cDNA 1700001G17 gene [Source:MGI Symbol;Acc:MGI:1914753]	1	889	0.575928	2	7	1	4	1	3
ENSMUSG00000095040	1700001J03Rik	RIKEN cDNA 1700001J03 gene [Source:MGI Symbol;Acc:MGI:1916532]	5	868	0.493088	8	1	4	15	9	8
ENSMUSG00000086135	1700001J04Rik	RIKEN cDNA 1700001J04 gene [Source:MGI Symbol;Acc:MGI:1919075]	11	929	0.533907	0	0	0	0	0	0
ENSMUSG00000101963	1700001J11Rik	RIKEN cDNA 1700001J11 gene [Source:MGI Symbol;Acc:MGI:1919474]	9	2664	0.464715	4	0	0	0	0	0
ENSMUSG00000056508	1700001K19Rik	RIKEN cDNA 1700001K19 gene [Source:MGI Symbol;Acc:MGI:1913573]	12	955	0.566492	1	2	17	16	2	9
ENSMUSG00000118314	1700001K23Rik	RIKEN cDNA 1700001K23 gene [Source:MGI Symbol;Acc:MGI:1916569]	19	1535	0.490554	0	0	1	0	1	0
ENSMUSG00000075511	1700001L05Rik	RIKEN cDNA 1700001L05 gene [Source:MGI Symbol;Acc:MGI:1916541]	15	6112	0.466787	30	66	31	30	45	27
ENSMUSG00000021534	1700001L19Rik	RIKEN cDNA 1700001L19 gene [Source:MGI Symbol;Acc:MGI:1916565]	13	1826	0.464951	0	2	0	6	1	1
ENSMUSG00000106210	1700001N15Rik	RIKEN cDNA 1700001N15 gene [Source:MGI Symbol;Acc:MGI:1923629]	3	482	0.408714	0	0	0	0	0	0
ENSMUSG00000044320	1700001O22Rik	RIKEN cDNA 1700001O22 gene [Source:MGI Symbol;Acc:MGI:1923631]	2	2788	0.592181	23	16	8	11	2	3
ENSMUSG00000018543	1700001P01Rik	RIKEN cDNA 1700001P01 gene [Source:MGI Symbol;Acc:MGI:1919465]	11	624	0.508013	0	3	2	6	8	3
ENSMUSG00000099391	1700003C15Rik	RIKEN cDNA 1700003C15 gene [Source:MGI Symbol;Acc:MGI:1916595]	5	1871	0.407803	0	0	0	0	0	0
ENSMUSG00000085944	1700003D09Rik	RIKEN cDNA 1700003D09 gene [Source:MGI Symbol;Acc:MGI:1916588]	11	1389	0.536357	1	0	0	0	0	0
ENSMUSG00000030030	1700003E16Rik	RIKEN cDNA 1700003E16 gene [Source:MGI Symbol;Acc:MGI:1919087]	6	2221	0.606033	18	20	56	55	15	6
ENSMUSG00000095110	1700003E24Rik	RIKEN cDNA 1700003E24 gene [Source:MGI Symbol;Acc:MGI:1916607]	X	577	0.450607	0	0	0	0	0	0
ENSMUSG00000038523	1700003F12Rik	RIKEN cDNA 1700003F12 gene [Source:MGI Symbol;Acc:MGI:1922730]	2	976	0.643443	1	4	2	1	0	2
ENSMUSG00000087621	1700003G18Rik	RIKEN cDNA 1700003G18 gene [Source:MGI Symbol;Acc:MGI:1916600]	7	1799	0.411895	10	1	2	0	0	6
ENSMUSG00000039174	1700003H04Rik	RIKEN cDNA 1700003H04 gene [Source:MGI Symbol;Acc:MGI:1923637]	3	1591	0.412319	0	0	0	0	0	0
ENSMUSG00000107526	1700003I16Rik	RIKEN cDNA 1700003I16 gene [Source:MGI Symbol;Acc:MGI:1923949]	6	1058	0.454631	0	0	0	0	0	0
ENSMUSG00000100372	1700003I22Rik	RIKEN cDNA 1700003I22 gene [Source:MGI Symbol;Acc:MGI:1916606]	1	482	0.470954	0	0	0	0	0	0
ENSMUSG00000101565	1700003L19Rik	RIKEN cDNA 1700003L19 gene [Source:MGI Symbol;Acc:MGI:1922743]	16	1269	0.437352	0	0	0	0	0	0
ENSMUSG00000085389	1700003M07Rik	RIKEN cDNA 1700003M07 gene [Source:MGI Symbol;Acc:MGI:1919475]	4	873	0.533792	4	7	6	2	2	3
ENSMUSG00000102463	1700003N22Rik	RIKEN cDNA 1700003N22 gene [Source:MGI Symbol;Acc:MGI:1919464]	3	808	0.601485	0	0	0	1	0	0
ENSMUSG00000118311	1700003O11Rik	RIKEN cDNA 1700003O11 gene [Source:MGI Symbol;Acc:MGI:1922882]	18	582	0.503436	0	0	0	0	0	0
ENSMUSG00000100727	1700003P14Rik	RIKEN cDNA 1700003P14 gene [Source:MGI Symbol;Acc:MGI:1916594]	13	1146	0.391798	0	1	1	0	0	5
ENSMUSG00000027973	1700006A11Rik	RIKEN cDNA 1700006A11 gene [Source:MGI Symbol;Acc:MGI:1919074]	3	2161	0.412309	0	0	0	0	0	0
ENSMUSG00000100274	1700006F04Rik	RIKEN cDNA 1700006F04 gene [Source:MGI Symbol;Acc:MGI:1922682]	14	441	0.433107	5	0	1	4	0	0
ENSMUSG00000102000	1700006H21Rik	RIKEN cDNA 1700006H21 gene [Source:MGI Symbol;Acc:MGI:1919507]	13	627	0.508772	0	0	0	0	0	0
ENSMUSG00000034764	1700006J14Rik	RIKEN cDNA 1700006J14 gene [Source:MGI Symbol;Acc:MGI:2447818]	10	2885	0.464471	7	0	0	8	1	0
ENSMUSG00000102738	1700006P03Rik	RIKEN cDNA 1700006P03 gene [Source:MGI Symbol;Acc:MGI:1925628]	1	409	0.435208	0	0	0	0	0	0
ENSMUSG00000101234	1700007E05Rik	RIKEN cDNA 1700007E05 gene [Source:MGI Symbol;Acc:MGI:2149745]	16	2628	0.436073	0	0	1	0	0	7
ENSMUSG00000100666	1700007F19Rik	RIKEN cDNA 1700007F19 gene [Source:MGI Symbol;Acc:MGI:1915100]	3	1642	0.4257	0	0	0	1	0	0
ENSMUSG00000116556	1700007H22Rik	RIKEN cDNA 1700007H22 gene [Source:MGI Symbol;Acc:MGI:1922734]	16	537	0.43203	0	0	0	0	0	0
ENSMUSG00000086330	1700007J10Rik	RIKEN cDNA 1700007J10 gene [Source:MGI Symbol;Acc:MGI:1916570]	11	1298	0.493837	8	3	1	6	4	16
ENSMUSG00000026831	1700007K13Rik	RIKEN cDNA 1700007K13 gene [Source:MGI Symbol;Acc:MGI:1916577]	2	965	0.525389	7	0	0	2	1	3
ENSMUSG00000097318	1700007L15Rik	RIKEN cDNA 1700007L15 gene [Source:MGI Symbol;Acc:MGI:1916581]	16	738	0.520325	15	6	17	5	5	5
ENSMUSG00000086613	1700007M16Rik	RIKEN cDNA 1700007M16 gene [Source:MGI Symbol;Acc:MGI:1919487]	2	435	0.448276	0	0	0	0	0	0
ENSMUSG00000089730	1700007P06Rik	RIKEN cDNA 1700007P06 gene [Source:MGI Symbol;Acc:MGI:1916558]	1	823	0.504253	0	0	0	8	0	0
ENSMUSG00000103452	1700008A23Rik	RIKEN cDNA 1700008A23 gene [Source:MGI Symbol;Acc:MGI:1922713]	9	691	0.510854	0	3	0	1	2	0
ENSMUSG00000104872	1700008B11Rik	RIKEN cDNA 1700008B11 gene [Source:MGI Symbol;Acc:MGI:1913571]	5	634	0.55205	16	2	5	18	17	3
ENSMUSG00000111986	1700008C04Rik	RIKEN cDNA 1700008C04 gene [Source:MGI Symbol;Acc:MGI:1922744]	12	797	0.461731	0	0	0	0	0	0
ENSMUSG00000106860	1700008H02Rik	RIKEN cDNA 1700008H02 gene [Source:MGI Symbol;Acc:MGI:1913575]	5	1684	0.388361	0	0	0	0	0	0
ENSMUSG00000101225	1700008J07Rik	RIKEN cDNA 1700008J07 gene [Source:MGI Symbol;Acc:MGI:1916610]	7	2432	0.512336	59	43	54	62	25	38
ENSMUSG00000101012	1700008K24Rik	RIKEN cDNA 1700008K24 gene [Source:MGI Symbol;Acc:MGI:1916561]	17	950	0.504211	0	0	0	0	0	0
ENSMUSG00000109657	1700008N11Rik	RIKEN cDNA 1700008N11 gene [Source:MGI Symbol;Acc:MGI:1922692]	8	636	0.424528	0	0	0	0	0	0
ENSMUSG00000008028	1700008O03Rik	RIKEN cDNA 1700008O03 gene [Source:MGI Symbol;Acc:MGI:1916599]	7	3675	0.518367	2	6	3	4	4	3
ENSMUSG00000069118	1700008P02Rik	RIKEN cDNA 1700008P02 gene [Source:MGI Symbol;Acc:MGI:1916597]	3	783	0.440613	0	0	0	0	0	0
ENSMUSG00000101404	1700009C05Rik	RIKEN cDNA 1700009C05 gene [Source:MGI Symbol;Acc:MGI:1921470]	6	788	0.442893	0	0	0	0	0	0
ENSMUSG00000096573	1700009J07Rik	RIKEN cDNA 1700009J07 gene [Source:MGI Symbol;Acc:MGI:1914938]	10	1368	0.51462	0	0	0	0	0	0
ENSMUSG00000028287	1700009N14Rik	RIKEN cDNA 1700009N14 gene [Source:MGI Symbol;Acc:MGI:1922721]	4	1258	0.5	0	1	0	0	0	0
ENSMUSG00000057047	1700010B08Rik	RIKEN cDNA 1700010B08 gene [Source:MGI Symbol;Acc:MGI:1922735]	2	899	0.509455	0	0	2	3	0	0
ENSMUSG00000099958	1700010B13Rik	RIKEN cDNA 1700010B13 gene [Source:MGI Symbol;Acc:MGI:1922741]	15	2102	0.499524	0	1	0	0	0	0
ENSMUSG00000071721	1700010D01Rik	RIKEN cDNA 1700010D01 gene [Source:MGI Symbol;Acc:MGI:1923636]	X	507	0.451677	0	0	0	0	0	0
ENSMUSG00000115752	1700010G06Rik	RIKEN cDNA 1700010G06 gene [Source:MGI Symbol;Acc:MGI:1921467]	15	683	0.484627	1	2	6	5	2	2
ENSMUSG00000067101	1700010H22Rik	RIKEN cDNA 1700010H22 gene [Source:MGI Symbol;Acc:MGI:1922750]	5	1355	0.41107	0	0	0	0	0	1
ENSMUSG00000100010	1700010I02Rik	RIKEN cDNA 1700010I02 gene [Source:MGI Symbol;Acc:MGI:1922726]	3	577	0.400347	0	0	0	0	0	0
ENSMUSG00000023873	1700010I14Rik	RIKEN cDNA 1700010I14 gene [Source:MGI Symbol;Acc:MGI:1914181]	17	2292	0.484729	1	6	1	12	10	13
ENSMUSG00000100314	1700010J16Rik	RIKEN cDNA 1700010J16 gene [Source:MGI Symbol;Acc:MGI:1916605]	10	928	0.414871	0	0	0	0	0	0
ENSMUSG00000092599	1700010K23Rik	RIKEN cDNA 1700010K23 gene [Source:MGI Symbol;Acc:MGI:1922751]	16	376	0.396277	3	0	0	0	0	4
ENSMUSG00000085102	1700010K24Rik	RIKEN cDNA 1700010K24 gene [Source:MGI Symbol;Acc:MGI:1922690]	3	226	0.473451	0	0	0	0	0	0
ENSMUSG00000030636	1700010L04Rik	RIKEN cDNA 1700010L04 gene [Source:MGI Symbol;Acc:MGI:1916583]	7	1577	0.447685	0	3	0	3	0	0
ENSMUSG00000101855	1700010N08Rik	RIKEN cDNA 1700010N08 gene [Source:MGI Symbol;Acc:MGI:1916590]	7	1414	0.448373	0	0	0	0	0	0
ENSMUSG00000102099	1700011B04Rik	RIKEN cDNA 1700011B04 gene [Source:MGI Symbol;Acc:MGI:1922894]	13	4166	0.417907	0	0	1	4	0	0
ENSMUSG00000108800	1700011C11Rik	RIKEN cDNA 1700011C11 gene [Source:MGI Symbol;Acc:MGI:1922701]	7	365	0.449315	0	0	0	0	0	0
ENSMUSG00000108791	1700011D18Rik	RIKEN cDNA 1700011D18 gene [Source:MGI Symbol;Acc:MGI:1922714]	7	277	0.509025	0	0	0	0	0	1
ENSMUSG00000109759	1700011L03Rik	RIKEN cDNA 1700011L03 gene [Source:MGI Symbol;Acc:MGI:1916535]	8	608	0.529605	0	0	0	0	0	0
ENSMUSG00000031682	1700011L22Rik	RIKEN cDNA 1700011L22 gene [Source:MGI Symbol;Acc:MGI:1914937]	8	1026	0.515595	3	1	7	0	2	2
ENSMUSG00000079476	1700011M02Rik	RIKEN cDNA 1700011M02 gene [Source:MGI Symbol;Acc:MGI:1922693]	X	420	0.533333	0	0	0	0	0	0
ENSMUSG00000029766	1700012A03Rik	RIKEN cDNA 1700012A03 gene [Source:MGI Symbol;Acc:MGI:1923632]	6	1008	0.509921	0	0	0	0	0	0
ENSMUSG00000020617	1700012B07Rik	RIKEN cDNA 1700012B07 gene [Source:MGI Symbol;Acc:MGI:1916574]	11	2177	0.502526	0	0	0	4	0	0
ENSMUSG00000031927	1700012B09Rik	RIKEN cDNA 1700012B09 gene [Source:MGI Symbol;Acc:MGI:1916575]	9	819	0.484737	0	1	0	0	0	0
ENSMUSG00000086482	1700012C08Rik	RIKEN cDNA 1700012C08 gene [Source:MGI Symbol;Acc:MGI:1923635]	4	363	0.495868	0	0	0	0	0	0
ENSMUSG00000085470	1700012C14Rik	RIKEN cDNA 1700012C14 gene [Source:MGI Symbol;Acc:MGI:1916587]	6	622	0.501608	0	0	0	5	0	0
ENSMUSG00000110424	1700012D14Rik	RIKEN cDNA 1700012D14 gene [Source:MGI Symbol;Acc:MGI:1922729]	7	4153	0.431977	50	37	77	15	8	19
ENSMUSG00000105023	1700012D16Rik	RIKEN cDNA 1700012D16 gene [Source:MGI Symbol;Acc:MGI:1922739]	3	577	0.490468	1	0	0	3	7	3
ENSMUSG00000101275	1700012E03Rik	RIKEN cDNA 1700012E03 gene [Source:MGI Symbol;Acc:MGI:1923817]	1	1377	0.49528	1	0	0	0	0	0
ENSMUSG00000102069	1700012I11Rik	RIKEN cDNA 1700012I11 gene [Source:MGI Symbol;Acc:MGI:1916584]	15	1039	0.460058	0	0	0	0	0	1
ENSMUSG00000107394	1700012J15Rik	RIKEN cDNA 1700012J15 gene [Source:MGI Symbol;Acc:MGI:1922737]	6	471	0.503185	0	0	0	0	0	0
ENSMUSG00000103545	1700012J22Rik	RIKEN cDNA 1700012J22 gene [Source:MGI Symbol;Acc:MGI:1922746]	13	830	0.480723	0	0	0	1	0	0
ENSMUSG00000028589	1700012P22Rik	RIKEN cDNA 1700012P22 gene [Source:MGI Symbol;Acc:MGI:1916614]	4	974	0.4846	0	0	0	0	0	0
ENSMUSG00000106899	1700013A02Rik	RIKEN cDNA 1700013A02 gene [Source:MGI Symbol;Acc:MGI:1916616]	5	645	0.429457	0	0	0	0	0	0
ENSMUSG00000079346	1700013D24Rik	RIKEN cDNA 1700013D24 gene [Source:MGI Symbol;Acc:MGI:1924171]	6	513	0.465887	0	0	0	0	0	0
ENSMUSG00000027886	1700013F07Rik	RIKEN cDNA 1700013F07 gene [Source:MGI Symbol;Acc:MGI:1922754]	3	1452	0.473829	0	4	10	3	2	0
ENSMUSG00000041399	1700013G24Rik	RIKEN cDNA 1700013G24 gene [Source:MGI Symbol;Acc:MGI:1916630]	4	1048	0.563931	0	0	0	0	0	0
ENSMUSG00000054727	1700013H16Rik	RIKEN cDNA 1700013H16 gene [Source:MGI Symbol;Acc:MGI:1922764]	X	1224	0.420752	0	0	0	0	0	0
ENSMUSG00000106586	1700013M08Rik	RIKEN cDNA 1700013M08 gene [Source:MGI Symbol;Acc:MGI:1922755]	5	1481	0.456448	0	0	0	0	0	0
ENSMUSG00000085801	1700013N06Rik	RIKEN cDNA 1700013N06 gene [Source:MGI Symbol;Acc:MGI:1922884]	12	663	0.46908	0	0	0	0	0	0
ENSMUSG00000118578	1700014B07Rik	RIKEN cDNA 1700014B07 gene [Source:MGI Symbol;Acc:MGI:1919498]	2	818	0.718826	5	0	0	2	5	1
ENSMUSG00000051054	1700014D04Rik	RIKEN cDNA 1700014D04 gene [Source:MGI Symbol;Acc:MGI:1921474]	13	3281	0.497409	3	2	2	6	0	5
ENSMUSG00000105903	1700014F14Rik	RIKEN cDNA 1700014F14 gene [Source:MGI Symbol;Acc:MGI:1924172]	5	197	0.426396	0	0	0	0	0	0
ENSMUSG00000110056	1700014L14Rik	RIKEN cDNA 1700014L14 gene [Source:MGI Symbol;Acc:MGI:1924173]	8	481	0.376299	0	0	0	0	0	0
ENSMUSG00000113696	1700015C15Rik	RIKEN cDNA 1700015C15 gene [Source:MGI Symbol;Acc:MGI:1922782]	13	374	0.44385	4	0	0	0	11	3
ENSMUSG00000104908	1700015C17Rik	RIKEN cDNA 1700015C17 gene [Source:MGI Symbol;Acc:MGI:1924178]	3	239	0.485356	2	0	0	2	1	0
ENSMUSG00000094445	1700015G11Rik	RIKEN cDNA 1700015G11 gene [Source:MGI Symbol;Acc:MGI:1922779]	7	397	0.463476	0	0	0	0	0	0
ENSMUSG00000115761	1700015H07Rik	RIKEN cDNA 1700015H07 gene [Source:MGI Symbol;Acc:MGI:1922777]	15	560	0.398214	0	0	0	0	0	0
ENSMUSG00000110335	1700015I17Rik	RIKEN cDNA 1700015I17 gene [Source:MGI Symbol;Acc:MGI:1922784]	8	2099	0.474988	0	0	0	0	0	0
ENSMUSG00000097671	1700015O11Rik	RIKEN cDNA 1700015O11 gene [Source:MGI Symbol;Acc:MGI:1919105]	6	678	0.510324	0	0	0	0	0	0
ENSMUSG00000102737	1700016A09Rik	RIKEN cDNA 1700016A09 gene [Source:MGI Symbol;Acc:MGI:1921477]	8	835	0.677844	5	7	22	15	1	7
ENSMUSG00000104538	1700016B01Rik	RIKEN cDNA 1700016B01 gene [Source:MGI Symbol;Acc:MGI:1922890]	5	270	0.555556	0	0	0	0	0	0
ENSMUSG00000108979	1700016B15Rik	RIKEN cDNA 1700016B15 gene [Source:MGI Symbol;Acc:MGI:1916677]	7	733	0.555252	1	0	1	0	2	0
ENSMUSG00000015962	1700016C15Rik	RIKEN cDNA 1700016C15 gene [Source:MGI Symbol;Acc:MGI:1916678]	1	768	0.458333	0	0	1	5	0	2
ENSMUSG00000031509	1700016D06Rik	RIKEN cDNA 1700016D06 gene [Source:MGI Symbol;Acc:MGI:1923663]	8	1612	0.453474	0	0	0	1	0	0
ENSMUSG00000103481	1700016D08Rik	RIKEN cDNA 1700016D08 gene [Source:MGI Symbol;Acc:MGI:1925627]	16	368	0.595109	1	0	2	1	0	0
ENSMUSG00000104955	1700016F12Rik	RIKEN cDNA 1700016F12 gene [Source:MGI Symbol;Acc:MGI:1916674]	5	655	0.433588	0	0	0	0	0	0
ENSMUSG00000100625	1700016G22Rik	RIKEN cDNA 1700016G22 gene [Source:MGI Symbol;Acc:MGI:1919117]	13	740	0.462162	0	0	0	7	0	0
ENSMUSG00000114673	1700016H03Rik	RIKEN cDNA 1700016H03 gene [Source:MGI Symbol;Acc:MGI:1922903]	19	437	0.508009	0	0	0	0	0	8
ENSMUSG00000029320	1700016H13Rik	RIKEN cDNA 1700016H13 gene [Source:MGI Symbol;Acc:MGI:1921468]	5	1751	0.49743	0	0	3	11	8	1
ENSMUSG00000111103	1700016J18Rik	RIKEN cDNA 1700016J18 gene [Source:MGI Symbol;Acc:MGI:1922811]	10	249	0.481928	4	1	1	0	2	0
ENSMUSG00000114563	1700016K05Rik	RIKEN cDNA 1700016K05 gene [Source:MGI Symbol;Acc:MGI:1922794]	17	386	0.42487	0	0	0	0	0	0
ENSMUSG00000053783	1700016K19Rik	RIKEN cDNA 1700016K19 gene [Source:MGI Symbol;Acc:MGI:1921480]	11	921	0.571118	0	0	0	5	0	0
ENSMUSG00000101483	1700016L21Rik	RIKEN cDNA 1700016L21 gene [Source:MGI Symbol;Acc:MGI:1919458]	1	968	0.427686	1	3	0	0	0	3
ENSMUSG00000085609	1700016P03Rik	RIKEN cDNA 1700016P03 gene [Source:MGI Symbol;Acc:MGI:1922792]	11	863	0.464658	21	14	49	15	40	10
ENSMUSG00000101894	1700016P04Rik	RIKEN cDNA 1700016P04 gene [Source:MGI Symbol;Acc:MGI:1916663]	6	429	0.41958	0	0	0	0	0	0
ENSMUSG00000032300	1700017B05Rik	RIKEN cDNA 1700017B05 gene [Source:MGI Symbol;Acc:MGI:1921461]	9	5235	0.572875	109	215	116	154	152	244
ENSMUSG00000037884	1700017G19Rik	RIKEN cDNA 1700017G19 gene [Source:MGI Symbol;Acc:MGI:1919477]	3	2904	0.455923	0	0	0	0	0	0
ENSMUSG00000098727	1700017I07Rik	RIKEN cDNA 1700017I07 gene [Source:MGI Symbol;Acc:MGI:1922756]	9	462	0.495671	0	0	0	0	0	0
ENSMUSG00000086348	1700017J07Rik	RIKEN cDNA 1700017J07 gene [Source:MGI Symbol;Acc:MGI:1922758]	2	473	0.501057	0	0	0	0	0	0
ENSMUSG00000107232	1700017L05Rik	RIKEN cDNA 1700017L05 gene [Source:MGI Symbol;Acc:MGI:1916620]	5	558	0.523297	0	0	0	0	0	0
ENSMUSG00000105651	1700017M07Rik	RIKEN cDNA 1700017M07 gene [Source:MGI Symbol;Acc:MGI:1923648]	3	940	0.489362	0	0	0	1	1	0
ENSMUSG00000056912	1700017N19Rik	RIKEN cDNA 1700017N19 gene [Source:MGI Symbol;Acc:MGI:1913855]	10	2353	0.399915	0	0	0	3	0	0
ENSMUSG00000038408	1700018A04Rik	RIKEN cDNA 1700018A04 gene [Source:MGI Symbol;Acc:MGI:1916631]	13	4216	0.533207	0	0	0	0	0	0
ENSMUSG00000103616	1700018A14Rik	RIKEN cDNA 1700018A14 gene [Source:MGI Symbol;Acc:MGI:1916641]	18	711	0.601969	1	0	7	2	0	0
ENSMUSG00000107368	1700018A23Rik	RIKEN cDNA 1700018A23 gene [Source:MGI Symbol;Acc:MGI:1919481]	6	398	0.525126	1	0	0	2	0	5
ENSMUSG00000031809	1700018B08Rik	RIKEN cDNA 1700018B08 gene [Source:MGI Symbol;Acc:MGI:1923655]	8	1294	0.572643	0	3	0	0	0	0
ENSMUSG00000037910	1700018B24Rik	RIKEN cDNA 1700018B24 gene [Source:MGI Symbol;Acc:MGI:1913582]	3	593	0.487352	0	0	0	0	0	0
ENSMUSG00000029620	1700018F24Rik	RIKEN cDNA 1700018F24 gene [Source:MGI Symbol;Acc:MGI:1916646]	5	1122	0.475045	0	0	0	0	0	0
ENSMUSG00000109745	1700018G05Rik	RIKEN cDNA 1700018G05 gene [Source:MGI Symbol;Acc:MGI:1916638]	X	386	0.554404	0	0	0	0	0	0
ENSMUSG00000100075	1700018L02Rik	RIKEN cDNA 1700018L02 gene [Source:MGI Symbol;Acc:MGI:1914579]	19	2485	0.51992	26	23	4	28	39	10
ENSMUSG00000046145	1700018M17Rik	RIKEN cDNA 1700018M17 gene [Source:MGI Symbol;Acc:MGI:1919495]	4	456	0.756579	7	5	0	0	7	5
ENSMUSG00000110709	1700018P08Rik	RIKEN cDNA 1700018P08 gene [Source:MGI Symbol;Acc:MGI:1920580]	8	1239	0.447942	0	0	0	0	0	9
ENSMUSG00000060715	1700019A02Rik	RIKEN cDNA 1700019A02 gene [Source:MGI Symbol;Acc:MGI:1916647]	1	777	0.397683	7	2	6	0	5	6
ENSMUSG00000109102	1700019A23Rik	RIKEN cDNA 1700019A23 gene [Source:MGI Symbol;Acc:MGI:1915470]	7	196	0.545918	0	0	0	0	0	0
ENSMUSG00000113770	1700019C18Rik	RIKEN cDNA 1700019C18 gene [Source:MGI Symbol;Acc:MGI:1922793]	13	2633	0.472465	0	0	0	0	0	0
ENSMUSG00000043629	1700019D03Rik	RIKEN cDNA 1700019D03 gene [Source:MGI Symbol;Acc:MGI:1914330]	1	4330	0.425404	8	3	22	15	0	8
ENSMUSG00000086202	1700019E08Rik	RIKEN cDNA 1700019E08 gene [Source:MGI Symbol;Acc:MGI:1916655]	2	830	0.431325	0	0	0	2	0	5
ENSMUSG00000107027	1700019F05Rik	RIKEN cDNA 1700019F05 gene [Source:MGI Symbol;Acc:MGI:1916652]	5	533	0.467167	0	0	0	0	0	0
ENSMUSG00000085416	1700019G24Rik	RIKEN cDNA 1700019G24 gene [Source:MGI Symbol;Acc:MGI:1919499]	6	503	0.45328	0	0	0	0	0	0
ENSMUSG00000111489	1700019J19Rik	RIKEN cDNA 1700019J19 gene [Source:MGI Symbol;Acc:MGI:1923662]	9	5324	0.461119	1	0	0	8	6	0
ENSMUSG00000111639	1700019L13Rik	RIKEN cDNA 1700019L13 gene [Source:MGI Symbol;Acc:MGI:1919476]	9	4947	0.554073	14	18	11	11	23	18
ENSMUSG00000059695	1700019M22Rik	RIKEN cDNA 1700019M22 gene [Source:MGI Symbol;Acc:MGI:1916673]	12	354	0.446328	0	0	0	0	0	0
ENSMUSG00000026931	1700019N19Rik	RIKEN cDNA 1700019N19 gene [Source:MGI Symbol;Acc:MGI:1914757]	19	1257	0.5179	0	4	0	2	0	0
ENSMUSG00000099808	1700019P21Rik	RIKEN cDNA 1700019P21 gene [Source:MGI Symbol;Acc:MGI:1922796]	1	411	0.459854	0	0	0	7	0	0
ENSMUSG00000027409	1700020A23Rik	RIKEN cDNA 1700020A23 gene [Source:MGI Symbol;Acc:MGI:1922906]	2	739	0.568336	0	0	0	0	0	0
ENSMUSG00000113628	1700020D12Rik	RIKEN cDNA 1700020D12 gene [Source:MGI Symbol;Acc:MGI:1916687]	12	426	0.478873	0	0	0	0	0	0
ENSMUSG00000110052	1700020G03Rik	RIKEN cDNA 1700020G03 gene [Source:MGI Symbol;Acc:MGI:1921485]	8	889	0.618673	0	0	0	2	0	0
ENSMUSG00000101801	1700020G17Rik	RIKEN cDNA 1700020G17 gene [Source:MGI Symbol;Acc:MGI:1922880]	10	1476	0.466802	0	0	0	0	0	0
ENSMUSG00000013928	1700020L13Rik	RIKEN cDNA 1700020L13 gene [Source:MGI Symbol;Acc:MGI:1922879]	7	2432	0.538651	0	0	0	0	0	0
ENSMUSG00000035085	1700020L24Rik	RIKEN cDNA 1700020L24 gene [Source:MGI Symbol;Acc:MGI:1913580]	11	1050	0.6	0	0	2	1	0	0
ENSMUSG00000100146	1700020M21Rik	RIKEN cDNA 1700020M21 gene [Source:MGI Symbol;Acc:MGI:1923652]	9	644	0.462733	0	0	0	0	0	0
ENSMUSG00000050844	1700020N01Rik	RIKEN cDNA 1700020N01 gene [Source:MGI Symbol;Acc:MGI:1914942]	10	1136	0.46743	0	0	0	0	0	0
ENSMUSG00000059690	1700020N15Rik	RIKEN cDNA 1700020N15 gene [Source:MGI Symbol;Acc:MGI:1922759]	X	525	0.43619	0	0	0	0	0	0
ENSMUSG00000100253	1700020N18Rik	RIKEN cDNA 1700020N18 gene [Source:MGI Symbol;Acc:MGI:1914336]	1	547	0.557587	1	0	0	2	0	0
ENSMUSG00000037535	1700021A07Rik	RIKEN cDNA 1700021A07 gene [Source:MGI Symbol;Acc:MGI:1924174]	10	721	0.493759	0	0	0	0	0	0
ENSMUSG00000105426	1700021F02Rik	RIKEN cDNA 1700021F02 gene [Source:MGI Symbol;Acc:MGI:1922769]	5	350	0.477143	0	0	0	0	0	0
ENSMUSG00000027518	1700021F07Rik	RIKEN cDNA 1700021F07 gene [Source:MGI Symbol;Acc:MGI:1919471]	2	646	0.547988	0	0	0	0	0	0
ENSMUSG00000107053	1700021F13Rik	RIKEN cDNA 1700021F13 gene [Source:MGI Symbol;Acc:MGI:1924176]	5	549	0.468124	0	0	0	0	0	0
ENSMUSG00000112387	1700021G15Rik	RIKEN cDNA 1700021G15 gene [Source:MGI Symbol;Acc:MGI:1920506]	10	528	0.443182	0	0	0	0	0	0
ENSMUSG00000086890	1700021J08Rik	RIKEN cDNA 1700021J08 gene [Source:MGI Symbol;Acc:MGI:1919485]	4	575	0.575652	0	0	0	3	0	0
ENSMUSG00000086955	1700021L23Rik	RIKEN cDNA 1700021L23 gene [Source:MGI Symbol;Acc:MGI:1923660]	4	726	0.506887	0	0	0	0	0	0
ENSMUSG00000087343	1700021N21Rik	RIKEN cDNA 1700021N21 gene [Source:MGI Symbol;Acc:MGI:1916659]	4	904	0.522124	0	0	0	0	0	1
ENSMUSG00000096796	1700021P04Rik	RIKEN cDNA 1700021P04 gene [Source:MGI Symbol;Acc:MGI:1922771]	19	659	0.497724	0	0	0	0	0	0
ENSMUSG00000038165	1700022A21Rik	RIKEN cDNA 1700022A21 gene [Source:MGI Symbol;Acc:MGI:1919502]	5	1448	0.535221	0	0	0	0	0	0
ENSMUSG00000099751	1700022A22Rik	RIKEN cDNA 1700022A22 gene [Source:MGI Symbol;Acc:MGI:1922807]	15	1507	0.436629	0	0	0	7	0	0
ENSMUSG00000099983	1700022E09Rik	RIKEN cDNA 1700022E09 gene [Source:MGI Symbol;Acc:MGI:1922886]	16	666	0.403904	2	0	0	9	0	1
ENSMUSG00000112581	1700022H01Rik	RIKEN cDNA 1700022H01 gene [Source:MGI Symbol;Acc:MGI:1922789]	10	387	0.542636	0	0	0	0	0	0
ENSMUSG00000099360	1700022H16Rik	RIKEN cDNA 1700022H16 gene [Source:MGI Symbol;Acc:MGI:1916670]	12	476	0.468487	0	0	0	0	0	0
ENSMUSG00000028451	1700022I11Rik	RIKEN cDNA 1700022I11 gene [Source:MGI Symbol;Acc:MGI:1914567]	4	4542	0.484808	3	5	0	9	10	6
ENSMUSG00000097523	1700022N22Rik	RIKEN cDNA 1700022N22 gene [Source:MGI Symbol;Acc:MGI:1916681]	17	1632	0.536152	0	5	5	2	7	6
ENSMUSG00000117050	1700023B13Rik	RIKEN cDNA 1700023B13 gene [Source:MGI Symbol;Acc:MGI:1920529]	17	1046	0.594646	5	3	5	11	8	2
ENSMUSG00000087393	1700023C21Rik	RIKEN cDNA 1700023C21 gene [Source:MGI Symbol;Acc:MGI:1920507]	11	389	0.44473	0	0	0	0	0	0
ENSMUSG00000100000	1700023F02Rik	RIKEN cDNA 1700023F02 gene [Source:MGI Symbol;Acc:MGI:1916683]	10	767	0.440678	4	6	0	3	7	6
ENSMUSG00000103503	1700023G09Rik	RIKEN cDNA 1700023G09 gene [Source:MGI Symbol;Acc:MGI:1920531]	1	1460	0.410959	0	0	0	0	0	0
ENSMUSG00000089827	1700023H06Rik	RIKEN cDNA 1700023H06 gene [Source:MGI Symbol;Acc:MGI:1916692]	13	1044	0.429119	0	3	0	2	0	1
ENSMUSG00000052334	1700024B05Rik	RIKEN cDNA 1700024B05 gene [Source:MGI Symbol;Acc:MGI:1922768]	14	1576	0.410533	0	0	0	0	0	0
ENSMUSG00000099994	1700024B18Rik	RIKEN cDNA 1700024B18 gene [Source:MGI Symbol;Acc:MGI:1916643]	14	423	0.434988	0	0	0	0	0	0
ENSMUSG00000072473	1700024G13Rik	RIKEN cDNA 1700024G13 gene [Source:MGI Symbol;Acc:MGI:1914335]	14	850	0.501176	0	0	0	0	0	0
ENSMUSG00000113825	1700024I08Rik	RIKEN cDNA 1700024I08 gene [Source:MGI Symbol;Acc:MGI:1922772]	13	984	0.438008	0	0	0	0	0	0
ENSMUSG00000069890	1700024J04Rik	RIKEN cDNA 1700024J04 gene [Source:MGI Symbol;Acc:MGI:1919098]	11	1821	0.449204	0	0	0	0	0	0
ENSMUSG00000106947	1700025A08Rik	RIKEN cDNA 1700025A08 gene [Source:MGI Symbol;Acc:MGI:1916650]	5	609	0.625616	0	1	0	0	0	1
ENSMUSG00000101113	1700025B11Rik	RIKEN cDNA 1700025B11 gene [Source:MGI Symbol;Acc:MGI:1923659]	15	553	0.455696	0	0	0	0	0	0
ENSMUSG00000078935	1700025C18Rik	RIKEN cDNA 1700025C18 gene [Source:MGI Symbol;Acc:MGI:1919461]	2	702	0.539886	4	0	0	10	0	0
ENSMUSG00000086760	1700025D23Rik	RIKEN cDNA 1700025D23 gene [Source:MGI Symbol;Acc:MGI:1916667]	11	846	0.481087	0	0	0	1	0	0
ENSMUSG00000100558	1700025F24Rik	RIKEN cDNA 1700025F24 gene [Source:MGI Symbol;Acc:MGI:1914331]	10	894	0.473154	1	0	0	0	0	0
ENSMUSG00000032666	1700025G04Rik	RIKEN cDNA 1700025G04 gene [Source:MGI Symbol;Acc:MGI:1916649]	1	11788	0.453936	704	662	545	511	588	807
ENSMUSG00000101888	1700025H01Rik	RIKEN cDNA 1700025H01 gene [Source:MGI Symbol;Acc:MGI:1922781]	16	547	0.548446	0	0	0	0	0	0
ENSMUSG00000108409	1700025J12Rik	RIKEN cDNA 1700025J12 gene [Source:MGI Symbol;Acc:MGI:1916657]	7	630	0.503175	0	0	0	0	0	0
ENSMUSG00000112482	1700025K04Rik	RIKEN cDNA 1700025K04 gene [Source:MGI Symbol;Acc:MGI:1913584]	10	1174	0.402896	0	0	0	0	0	0
ENSMUSG00000099747	1700025K24Rik	RIKEN cDNA 1700025K24 gene [Source:MGI Symbol;Acc:MGI:1916668]	17	740	0.439189	0	0	0	0	0	0
ENSMUSG00000109962	1700025L06Rik	RIKEN cDNA 1700025L06 gene [Source:MGI Symbol;Acc:MGI:1914183]	7	2169	0.537114	0	0	0	0	0	0
ENSMUSG00000100175	1700025M24Rik	RIKEN cDNA 1700025M24 gene [Source:MGI Symbol;Acc:MGI:1919526]	5	772	0.487047	0	0	0	0	2	0
ENSMUSG00000090200	1700025N21Rik	RIKEN cDNA 1700025N21 gene [Source:MGI Symbol;Acc:MGI:1916665]	10	686	0.504373	0	2	0	0	0	0
ENSMUSG00000100121	1700025N23Rik	RIKEN cDNA 1700025N23 gene [Source:MGI Symbol;Acc:MGI:1917236]	6	915	0.500546	0	0	3	6	1	0
ENSMUSG00000028244	1700025O08Rik	RIKEN cDNA 1700025O08 gene [Source:MGI Symbol;Acc:MGI:1917234]	4	456	0.394737	0	0	0	0	0	0
ENSMUSG00000086379	1700026D11Rik	RIKEN cDNA 1700026D11 gene [Source:MGI Symbol;Acc:MGI:1917621]	2	2929	0.499829	0	0	0	0	0	0
ENSMUSG00000101854	1700026F02Rik	RIKEN cDNA 1700026F02 gene [Source:MGI Symbol;Acc:MGI:1916669]	8	1679	0.472901	5	3	5	2	0	0
ENSMUSG00000073976	1700026J12Rik	RIKEN cDNA 1700026J12 gene [Source:MGI Symbol;Acc:MGI:1920505]	16	1155	0.404329	0	0	0	0	0	0
ENSMUSG00000097716	1700026J14Rik	RIKEN cDNA 1700026J14 gene [Source:MGI Symbol;Acc:MGI:1916682]	6	794	0.518892	4	1	7	2	0	5
ENSMUSG00000114681	1700026N04Rik	RIKEN cDNA 1700026N04 gene [Source:MGI Symbol;Acc:MGI:1919521]	13	643	0.589425	10	6	15	0	9	0
ENSMUSG00000084864	1700027A07Rik	RIKEN cDNA 1700027A07 gene [Source:MGI Symbol;Acc:MGI:1917246]	15	458	0.5	0	0	0	0	0	0
ENSMUSG00000101968	1700027A15Rik	RIKEN cDNA 1700027A15 gene [Source:MGI Symbol;Acc:MGI:1916699]	1	1396	0.482808	0	0	0	0	0	0
ENSMUSG00000107737	1700027F06Rik	RIKEN cDNA 1700027F06 gene [Source:MGI Symbol;Acc:MGI:1919518]	6	243	0.506173	0	0	0	0	0	0
ENSMUSG00000100911	1700027F09Rik	RIKEN cDNA 1700027F09 gene [Source:MGI Symbol;Acc:MGI:1917249]	5	767	0.436767	0	0	0	0	0	0
ENSMUSG00000100799	1700027H10Rik	RIKEN cDNA 1700027H10 gene [Source:MGI Symbol;Acc:MGI:1919524]	3	584	0.421233	0	0	0	0	0	0
ENSMUSG00000098304	1700027I24Rik	RIKEN cDNA 1700027I24 gene [Source:MGI Symbol;Acc:MGI:1922817]	9	696	0.395115	1	0	0	0	0	0
ENSMUSG00000111422	1700027J07Rik	RIKEN cDNA 1700027J07 gene [Source:MGI Symbol;Acc:MGI:1916693]	10	2782	0.489216	1	0	0	1	0	0
ENSMUSG00000099417	1700028B04Rik	RIKEN cDNA 1700028B04 gene [Source:MGI Symbol;Acc:MGI:1917251]	7	971	0.54171	0	0	3	0	4	0
ENSMUSG00000101683	1700028D13Rik	RIKEN cDNA 1700028D13 gene [Source:MGI Symbol;Acc:MGI:1922819]	5	718	0.523677	0	0	0	0	0	0
ENSMUSG00000097321	1700028E10Rik	RIKEN cDNA 1700028E10 gene [Source:MGI Symbol;Acc:MGI:1916713]	5	6927	0.4507	38	21	70	21	29	27
ENSMUSG00000056821	1700028I16Rik	RIKEN cDNA 1700028I16 gene [Source:MGI Symbol;Acc:MGI:1917253]	10	1056	0.534091	0	0	0	1	0	0
ENSMUSG00000038782	1700028J19Rik	RIKEN cDNA 1700028J19 gene [Source:MGI Symbol;Acc:MGI:1917254]	7	2471	0.503035	2	0	0	0	4	0
ENSMUSG00000089798	1700028K03Rik	RIKEN cDNA 1700028K03 gene [Source:MGI Symbol;Acc:MGI:1923671]	5	7963	0.402612	11	1	13	7	0	3
ENSMUSG00000101334	1700028M03Rik	RIKEN cDNA 1700028M03 gene [Source:MGI Symbol;Acc:MGI:1916710]	3	476	0.468487	0	0	0	0	0	0
ENSMUSG00000078635	1700028N14Rik	RIKEN cDNA 1700028N14 gene [Source:MGI Symbol;Acc:MGI:1920530]	11	747	0.570281	10	12	6	23	22	22
ENSMUSG00000033053	1700028P14Rik	RIKEN cDNA 1700028P14 gene [Source:MGI Symbol;Acc:MGI:1914733]	19	875	0.460571	1	0	0	1	0	2
ENSMUSG00000086823	1700028P15Rik	RIKEN cDNA 1700028P15 gene [Source:MGI Symbol;Acc:MGI:1922905]	2	3553	0.449761	0	0	0	0	0	0
ENSMUSG00000100759	1700029B22Rik	RIKEN cDNA 1700029B22 gene [Source:MGI Symbol;Acc:MGI:1916745]	7	699	0.484979	0	0	0	2	0	0
ENSMUSG00000102834	1700029B24Rik	RIKEN cDNA 1700029B24 gene [Source:MGI Symbol;Acc:MGI:1919533]	3	497	0.444668	0	0	0	0	0	0
ENSMUSG00000100557	1700029E06Rik	RIKEN cDNA 1700029E06 gene [Source:MGI Symbol;Acc:MGI:1919500]	5	757	0.418758	0	0	0	0	0	0
ENSMUSG00000052075	1700029F12Rik	RIKEN cDNA 1700029F12 gene [Source:MGI Symbol;Acc:MGI:1913729]	13	1140	0.504386	0	0	0	0	4	0
ENSMUSG00000031452	1700029H14Rik	RIKEN cDNA 1700029H14 gene [Source:MGI Symbol;Acc:MGI:1913751]	8	1421	0.546094	0	1	11	0	8	6
ENSMUSG00000044916	1700029I15Rik	RIKEN cDNA 1700029I15 gene [Source:MGI Symbol;Acc:MGI:1916742]	2	1348	0.549703	16	24	36	15	6	11
ENSMUSG00000099968	1700029J03Rik	RIKEN cDNA 1700029J03 gene [Source:MGI Symbol;Acc:MGI:1919514]	16	1527	0.499673	0	0	0	0	0	0
ENSMUSG00000071103	1700029J07Rik	RIKEN cDNA 1700029J07 gene [Source:MGI Symbol;Acc:MGI:1916729]	8	3006	0.452096	146	102	155	149	90	127
ENSMUSG00000101189	1700029M03Rik	RIKEN cDNA 1700029M03 gene [Source:MGI Symbol;Acc:MGI:1916726]	1	685	0.414599	0	0	0	0	0	0
ENSMUSG00000086788	1700029M20Rik	RIKEN cDNA 1700029M20 gene [Source:MGI Symbol;Acc:MGI:1913597]	4	3024	0.503307	0	0	0	0	0	0
ENSMUSG00000098144	1700029N11Rik	RIKEN cDNA 1700029N11 gene [Source:MGI Symbol;Acc:MGI:1916741]	13	1248	0.463942	0	0	0	0	0	0
ENSMUSG00000085333	1700030A11Rik	RIKEN cDNA 1700030A11 gene [Source:MGI Symbol;Acc:MGI:1921429]	17	888	0.488739	0	0	0	0	0	5
ENSMUSG00000099759	1700030C10Rik	RIKEN cDNA 1700030C10 gene [Source:MGI Symbol;Acc:MGI:1916763]	12	1735	0.536599	12	58	39	5	22	10
ENSMUSG00000091071	1700030C10Rik	RIKEN cDNA 1700030C10 gene [Source:MGI Symbol;Acc:MGI:1916763]	12	1471	0.586676	6	3	0	4	13	2
ENSMUSG00000086459	1700030C12Rik	RIKEN cDNA 1700030C12 gene [Source:MGI Symbol;Acc:MGI:1919496]	11	1169	0.457656	2	1	7	0	4	3
ENSMUSG00000087148	1700030C14Rik	RIKEN cDNA 1700030C14 gene [Source:MGI Symbol;Acc:MGI:1922912]	2	756	0.531746	1	0	0	0	2	0
ENSMUSG00000112619	1700030E10Rik	RIKEN cDNA 1700030E10 gene [Source:MGI Symbol;Acc:MGI:1916765]	10	721	0.474341	0	0	0	0	0	4
ENSMUSG00000099869	1700030F04Rik	RIKEN cDNA 1700030F04 gene [Source:MGI Symbol;Acc:MGI:1919513]	6	802	0.478803	0	0	0	6	1	1
ENSMUSG00000103387	1700030I03Rik	RIKEN cDNA 1700030I03 gene [Source:MGI Symbol;Acc:MGI:1916753]	12	942	0.485138	0	1	0	15	10	3
ENSMUSG00000031847	1700030J22Rik	RIKEN cDNA 1700030J22 gene [Source:MGI Symbol;Acc:MGI:1916778]	8	2996	0.517023	33	27	87	86	28	35
ENSMUSG00000052794	1700030K09Rik	RIKEN cDNA 1700030K09 gene [Source:MGI Symbol;Acc:MGI:1919504]	8	2970	0.515488	61	71	48	83	60	55
ENSMUSG00000099508	1700030L20Rik	RIKEN cDNA 1700030L20 gene [Source:MGI Symbol;Acc:MGI:1917305]	3	985	0.434518	0	0	0	0	0	0
ENSMUSG00000113179	1700030L22Rik	RIKEN cDNA 1700030L22 gene [Source:MGI Symbol;Acc:MGI:1922826]	12	865	0.43237	0	0	0	2	0	1
ENSMUSG00000097424	1700030M09Rik	RIKEN cDNA 1700030M09 gene [Source:MGI Symbol;Acc:MGI:1919509]	8	1102	0.539927	0	0	0	0	0	0
ENSMUSG00000100969	1700030N03Rik	RIKEN cDNA 1700030N03 gene [Source:MGI Symbol;Acc:MGI:1917261]	19	5310	0.458569	0	0	0	0	0	0
ENSMUSG00000106800	1700030N18Rik	RIKEN cDNA 1700030N18 gene [Source:MGI Symbol;Acc:MGI:1917266]	5	966	0.494824	0	0	0	0	0	0
ENSMUSG00000100198	1700030O20Rik	RIKEN cDNA 1700030O20 gene [Source:MGI Symbol;Acc:MGI:1919536]	10	594	0.491582	0	1	2	2	0	1
ENSMUSG00000092239	1700031A10Rik	RIKEN cDNA 1700031A10 gene [Source:MGI Symbol;Acc:MGI:1920536]	17	656	0.492378	0	0	0	0	0	0
ENSMUSG00000032894	1700031F05Rik	RIKEN cDNA 1700031F05 gene [Source:MGI Symbol;Acc:MGI:1920550]	X	1444	0.488227	0	0	0	4	0	0
ENSMUSG00000047046	1700031F10Rik	RIKEN cDNA 1700031F10 gene [Source:MGI Symbol;Acc:MGI:1920567]	6	639	0.549296	4	3	1	2	2	0
ENSMUSG00000099863	1700031L13Rik	RIKEN cDNA 1700031L13 gene [Source:MGI Symbol;Acc:MGI:1914577]	5	960	0.361458	0	0	0	0	0	0
ENSMUSG00000099353	1700031M16Rik	RIKEN cDNA 1700031M16 gene [Source:MGI Symbol;Acc:MGI:1920552]	15	1666	0.455582	0	0	0	1	0	0
ENSMUSG00000100315	1700031P21Rik	RIKEN cDNA 1700031P21 gene [Source:MGI Symbol;Acc:MGI:1920528]	12	568	0.443662	0	0	0	2	0	0
ENSMUSG00000097302	1700034B16Rik	RIKEN cDNA 1700034B16 gene [Source:MGI Symbol;Acc:MGI:1920532]	18	722	0.51108	0	0	0	0	0	0
ENSMUSG00000024532	1700034E13Rik	RIKEN cDNA 1700034E13 gene [Source:MGI Symbol;Acc:MGI:1925664]	18	490	0.446939	0	0	0	0	0	0
ENSMUSG00000097962	1700034G24Rik	RIKEN cDNA 1700034G24 gene [Source:MGI Symbol;Acc:MGI:1914575]	5	1081	0.53284	0	0	0	0	0	0
ENSMUSG00000055833	1700034H15Rik	RIKEN cDNA 1700034H15 gene [Source:MGI Symbol;Acc:MGI:1921515]	1	6099	0.496475	20	23	68	24	13	14
ENSMUSG00000074619	1700034I23Rik	RIKEN cDNA 1700034I23 gene [Source:MGI Symbol;Acc:MGI:1920547]	3	2348	0.441227	0	4	0	0	0	0
ENSMUSG00000103287	1700034J04Rik	RIKEN cDNA 1700034J04 gene [Source:MGI Symbol;Acc:MGI:1920554]	12	750	0.492	0	0	0	0	0	0
ENSMUSG00000040163	1700034J05Rik	RIKEN cDNA 1700034J05 gene [Source:MGI Symbol;Acc:MGI:1920594]	6	3007	0.440306	0	0	0	0	0	0
ENSMUSG00000100294	1700034K08Rik	RIKEN cDNA 1700034K08 gene [Source:MGI Symbol;Acc:MGI:1925599]	9	824	0.436893	0	0	0	0	0	0
ENSMUSG00000097893	1700034P13Rik	RIKEN cDNA 1700034P13 gene [Source:MGI Symbol;Acc:MGI:1920581]	1	3101	0.501774	0	1	4	0	0	0
ENSMUSG00000095956	1700036A12Rik	RIKEN cDNA 1700036A12 gene [Source:MGI Symbol;Acc:MGI:1920548]	9	1828	0.502735	0	0	0	0	1	11
ENSMUSG00000099995	1700036G14Rik	RIKEN cDNA 1700036G14 gene [Source:MGI Symbol;Acc:MGI:1920533]	3	542	0.472325	0	0	0	0	0	1
ENSMUSG00000086185	1700036O09Rik	RIKEN cDNA 1700036O09 gene [Source:MGI Symbol;Acc:MGI:1920512]	X	349	0.346705	0	0	0	0	0	0
ENSMUSG00000085542	1700037C06Rik	RIKEN cDNA 1700037C06 gene [Source:MGI Symbol;Acc:MGI:1921513]	4	874	0.516018	0	0	0	0	0	0
ENSMUSG00000005983	1700037C18Rik	RIKEN cDNA 1700037C18 gene [Source:MGI Symbol;Acc:MGI:1920511]	16	3227	0.537031	15	11	6	10	27	11
ENSMUSG00000114125	1700037F03Rik	RIKEN cDNA 1700037F03 gene [Source:MGI Symbol;Acc:MGI:1914566]	13	365	0.463014	8	3	6	2	0	7
ENSMUSG00000027327	1700037H04Rik	RIKEN cDNA 1700037H04 gene [Source:MGI Symbol;Acc:MGI:1914576]	2	2286	0.552931	133	136	68	74	100	125
ENSMUSG00000092369	1700039E22Rik	RIKEN cDNA 1700039E22 gene [Source:MGI Symbol;Acc:MGI:1920572]	19	770	0.574026	0	0	0	0	0	0
ENSMUSG00000102536	1700039I01Rik	RIKEN cDNA 1700039I01 gene [Source:MGI Symbol;Acc:MGI:1920596]	1	479	0.592902	0	0	0	0	0	0
ENSMUSG00000097933	1700039M10Rik	RIKEN cDNA 1700039M10 gene [Source:MGI Symbol;Acc:MGI:1914768]	14	532	0.37594	0	0	0	0	0	0
ENSMUSG00000104086	1700039M15Rik	RIKEN cDNA 1700039M15 gene [Source:MGI Symbol;Acc:MGI:1921516]	9	1120	0.457143	0	0	0	0	0	0
ENSMUSG00000097515	1700040D17Rik	RIKEN cDNA 1700040D17 gene [Source:MGI Symbol;Acc:MGI:1923852]	3	998	0.435872	2	3	8	21	0	0
ENSMUSG00000113997	1700040E09Rik	RIKEN cDNA 1700040E09 gene [Source:MGI Symbol;Acc:MGI:1924240]	12	606	0.410891	0	0	0	0	0	0
ENSMUSG00000100667	1700040F15Rik	RIKEN cDNA 1700040F15 gene [Source:MGI Symbol;Acc:MGI:1920579]	Y	931	0.351235	0	0	0	0	0	0
ENSMUSG00000101568	1700040F17Rik	RIKEN cDNA 1700040F17 gene [Source:MGI Symbol;Acc:MGI:1920584]	15	817	0.423501	0	0	0	0	0	0
ENSMUSG00000103840	1700040K01Rik	RIKEN cDNA 1700040K01 gene [Source:MGI Symbol;Acc:MGI:1920517]	1	438	0.452055	0	0	0	0	0	0
ENSMUSG00000107406	1700040L08Rik	RIKEN cDNA 1700040L08 gene [Source:MGI Symbol;Acc:MGI:1920544]	6	541	0.441774	3	0	2	0	0	4
ENSMUSG00000116260	1700041B01Rik	RIKEN cDNA 1700041B01 gene [Source:MGI Symbol;Acc:MGI:1925873]	15	503	0.580517	0	0	0	4	0	0
ENSMUSG00000100282	1700041C23Rik	RIKEN cDNA 1700041C23 gene [Source:MGI Symbol;Acc:MGI:1914569]	9	395	0.379747	0	0	0	0	1	0
ENSMUSG00000054822	1700041G16Rik	RIKEN cDNA 1700041G16 gene [Source:MGI Symbol;Acc:MGI:1920549]	8	1824	0.501096	3	2	5	6	0	14
ENSMUSG00000104845	1700041I07Rik	RIKEN cDNA 1700041I07 gene [Source:MGI Symbol;Acc:MGI:1920523]	5	435	0.505747	1	0	0	0	1	0
ENSMUSG00000087010	1700041M05Rik	RIKEN cDNA 1700041M05 gene [Source:MGI Symbol;Acc:MGI:1920510]	4	306	0.493464	0	0	0	0	0	0
ENSMUSG00000100857	1700041M19Rik	RIKEN cDNA 1700041M19 gene [Source:MGI Symbol;Acc:MGI:1923851]	16	2947	0.425178	0	0	0	0	0	5
ENSMUSG00000105991	1700042D02Rik	RIKEN cDNA 1700042D02 gene [Source:MGI Symbol;Acc:MGI:1920587]	9	389	0.44473	0	0	0	0	0	0
ENSMUSG00000078593	1700042G07Rik	RIKEN cDNA 1700042G07 gene [Source:MGI Symbol;Acc:MGI:1914573]	4	385	0.574026	0	0	0	0	0	0
ENSMUSG00000087044	1700042G15Rik	RIKEN cDNA 1700042G15 gene [Source:MGI Symbol;Acc:MGI:1920599]	4	664	0.533133	0	0	0	2	0	0
ENSMUSG00000112878	1700042O05Rik	RIKEN cDNA 1700042O05 gene [Source:MGI Symbol;Acc:MGI:1920540]	10	584	0.40411	0	0	0	0	0	0
ENSMUSG00000086391	1700042O10Rik	RIKEN cDNA 1700042O10 gene [Source:MGI Symbol;Acc:MGI:1920571]	11	1075	0.466977	0	1	0	0	0	5
ENSMUSG00000099911	1700044C05Rik	RIKEN cDNA 1700044C05 gene [Source:MGI Symbol;Acc:MGI:1920556]	14	898	0.453229	0	0	0	0	0	1
ENSMUSG00000100297	1700044K03Rik	RIKEN cDNA 1700044K03 gene [Source:MGI Symbol;Acc:MGI:1914571]	18	377	0.408488	0	0	0	0	0	0
ENSMUSG00000078492	1700045H11Rik	RIKEN cDNA 1700045H11 gene [Source:MGI Symbol;Acc:MGI:1920598]	4	593	0.485666	0	0	0	2	0	0
ENSMUSG00000104526	1700045I11Rik	RIKEN cDNA 1700045I11 gene [Source:MGI Symbol;Acc:MGI:1920600]	4	493	0.602434	0	0	0	0	0	0
ENSMUSG00000085561	1700046C09Rik	RIKEN cDNA 1700046C09 gene [Source:MGI Symbol;Acc:MGI:1920557]	11	543	0.410681	0	0	0	0	0	0
ENSMUSG00000085437	1700047A11Rik	RIKEN cDNA 1700047A11 gene [Source:MGI Symbol;Acc:MGI:1923854]	8	821	0.439708	4	0	1	0	0	0
ENSMUSG00000115294	1700047E10Rik	RIKEN cDNA 1700047E10 gene [Source:MGI Symbol;Acc:MGI:1921578]	14	568	0.498239	0	0	0	0	0	0
ENSMUSG00000085549	1700047F07Rik	RIKEN cDNA 1700047F07 gene [Source:MGI Symbol;Acc:MGI:1920570]	4	1050	0.50381	0	0	4	0	0	1
ENSMUSG00000099349	1700047G03Rik	RIKEN cDNA 1700047G03 gene [Source:MGI Symbol;Acc:MGI:1920589]	15	1493	0.486269	0	0	0	1	0	0
ENSMUSG00000110717	1700047G07Rik	RIKEN cDNA 1700047G07 gene [Source:MGI Symbol;Acc:MGI:1920573]	8	902	0.44235	0	0	0	0	0	0
ENSMUSG00000087347	1700047K16Rik	RIKEN cDNA 1700047K16 gene [Source:MGI Symbol;Acc:MGI:1920585]	11	886	0.513544	1	6	6	0	1	0
ENSMUSG00000101762	1700047L14Rik	RIKEN cDNA 1700047L14 gene [Source:MGI Symbol;Acc:MGI:1920545]	5	511	0.418787	0	0	0	0	0	0
ENSMUSG00000100147	1700047M11Rik	RIKEN cDNA 1700047M11 gene [Source:MGI Symbol;Acc:MGI:1914580]	1	2846	0.455727	0	3	1	0	0	13
ENSMUSG00000102356	1700047N06Rik	RIKEN cDNA 1700047N06 gene [Source:MGI Symbol;Acc:MGI:1923853]	1	920	0.388043	0	0	0	0	0	0
ENSMUSG00000109594	1700047O18Rik	RIKEN cDNA 1700047O18 gene [Source:MGI Symbol;Acc:MGI:1920668]	7	743	0.429341	3	0	0	0	0	0
ENSMUSG00000105274	1700048F04Rik	RIKEN cDNA 1700048F04 gene [Source:MGI Symbol;Acc:MGI:1920646]	5	1064	0.460526	0	0	0	0	0	0
ENSMUSG00000085637	1700048M11Rik	RIKEN cDNA 1700048M11 gene [Source:MGI Symbol;Acc:MGI:1920636]	16	485	0.478351	0	0	0	0	0	0
ENSMUSG00000118016	1700048O14Rik	RIKEN cDNA 1700048O14 gene [Source:MGI Symbol;Acc:MGI:1920683]	19	521	0.424184	0	0	0	0	0	0
ENSMUSG00000043773	1700048O20Rik	RIKEN cDNA 1700048O20 gene [Source:MGI Symbol;Acc:MGI:1920637]	9	2099	0.45879	10	16	22	7	7	5
ENSMUSG00000112333	1700048P04Rik	RIKEN cDNA 1700048P04 gene [Source:MGI Symbol;Acc:MGI:1920605]	10	369	0.485095	0	0	0	0	0	0
ENSMUSG00000085077	1700049E15Rik	RIKEN cDNA 1700049E15 gene [Source:MGI Symbol;Acc:MGI:1920644]	6	1047	0.484241	0	0	0	0	0	0
ENSMUSG00000079271	1700049E17Rik1	RIKEN cDNA 1700049E17 gene, gene 1 [Source:MGI Symbol;Acc:MGI:1920665]	14	1761	0.375355	0	0	0	0	0	0
ENSMUSG00000090440	1700049E17Rik2	tandem duplication of RIKEN cDNA 1700049E17 gene, gene 2 [Source:MGI Symbol;Acc:MGI:3796510]	14	1757	0.376209	0	0	0	0	0	0
ENSMUSG00000101553	1700049E22Rik	RIKEN cDNA 1700049E22 gene [Source:MGI Symbol;Acc:MGI:1920645]	6	507	0.532544	0	0	0	0	0	0
ENSMUSG00000043859	1700049L16Rik	RIKEN cDNA 1700049L16 gene [Source:MGI Symbol;Acc:MGI:1920633]	10	543	0.500921	0	0	0	0	0	0
ENSMUSG00000086951	1700051A21Rik	RIKEN cDNA 1700051A21 gene [Source:MGI Symbol;Acc:MGI:1920616]	11	1800	0.536111	1	0	0	0	0	0
ENSMUSG00000108263	1700051K13Rik	RIKEN cDNA 1700051K13 gene [Source:MGI Symbol;Acc:MGI:1920602]	6	696	0.41092	0	0	0	0	0	0
ENSMUSG00000103341	1700051O22Rik	RIKEN cDNA 1700051O22 Gene [Source:MGI Symbol;Acc:MGI:3704315]	8	638	0.556426	0	2	2	0	0	0
ENSMUSG00000105297	1700052H01Rik	RIKEN cDNA 1700052H01 gene [Source:MGI Symbol;Acc:MGI:1920712]	3	1025	0.470244	0	0	0	0	0	7
ENSMUSG00000101912	1700052I22Rik	RIKEN cDNA 1700052I22 gene [Source:MGI Symbol;Acc:MGI:1914590]	12	379	0.46438	0	0	0	0	0	0
ENSMUSG00000099681	1700052K11Rik	RIKEN cDNA 1700052K11 gene [Source:MGI Symbol;Acc:MGI:1920681]	11	3708	0.488943	46	28	58	45	32	64
ENSMUSG00000099988	1700054A03Rik	RIKEN cDNA 1700054A03 gene [Source:MGI Symbol;Acc:MGI:1925707]	19	4290	0.47296	0	0	0	0	1	5
ENSMUSG00000097001	1700054K02Rik	RIKEN cDNA 1700054K02 gene [Source:MGI Symbol;Acc:MGI:1925600]	1	376	0.470745	0	0	0	0	0	0
ENSMUSG00000100219	1700054K19Rik	RIKEN cDNA 1700054K19 gene [Source:MGI Symbol;Acc:MGI:1914586]	6	452	0.45354	0	0	0	0	0	0
ENSMUSG00000085889	1700054M17Rik	RIKEN cDNA 1700054M17 gene [Source:MGI Symbol;Acc:MGI:1920608]	2	445	0.478652	0	0	0	7	0	0
ENSMUSG00000111753	1700054O05Rik	RIKEN cDNA 1700054O05 gene [Source:MGI Symbol;Acc:MGI:1920606]	10	555	0.502703	0	0	0	0	0	0
ENSMUSG00000104183	1700054O19Rik	RIKEN cDNA 1700054O19 gene [Source:MGI Symbol;Acc:MGI:1921522]	14	868	0.47235	11	23	1	18	12	10
ENSMUSG00000093616	1700055C04Rik	RIKEN cDNA 1700055C04 gene [Source:MGI Symbol;Acc:MGI:1920647]	9	355	0.549296	0	0	0	0	0	0
ENSMUSG00000070997	1700055D18Rik	RIKEN cDNA 1700055D18 gene [Source:MGI Symbol;Acc:MGI:1920655]	4	3720	0.49328	11	17	41	11	11	21
ENSMUSG00000044854	1700056E22Rik	RIKEN cDNA 1700056E22 gene [Source:MGI Symbol;Acc:MGI:1920613]	1	1272	0.628931	7	16	32	0	5	3
ENSMUSG00000084792	1700056N10Rik	RIKEN cDNA 1700056N10 gene [Source:MGI Symbol;Acc:MGI:1920642]	16	1043	0.471716	39	39	23	45	29	20
ENSMUSG00000074139	1700057G04Rik	RIKEN cDNA 1700057G04 gene [Source:MGI Symbol;Acc:MGI:1925709]	9	1974	0.448835	2	0	0	0	0	0
ENSMUSG00000084757	1700057H15Rik	RIKEN cDNA 1700057H15 gene [Source:MGI Symbol;Acc:MGI:1925710]	4	1252	0.515974	0	0	0	0	0	0
ENSMUSG00000086007	1700057H21Rik	RIKEN cDNA 1700057H21 gene [Source:MGI Symbol;Acc:MGI:1920625]	2	697	0.464849	0	0	0	0	0	0
ENSMUSG00000089636	1700058P15Rik	RIKEN cDNA 1700058P15 gene [Source:MGI Symbol;Acc:MGI:1920627]	7	413	0.479419	0	0	4	2	0	2
ENSMUSG00000086887	1700060C16Rik	RIKEN cDNA 1700060C16 gene [Source:MGI Symbol;Acc:MGI:1920675]	6	645	0.496124	0	0	0	0	0	0
ENSMUSG00000078957	1700060C20Rik	RIKEN cDNA 1700060C20 gene [Source:MGI Symbol;Acc:MGI:1920649]	2	605	0.52562	0	0	0	0	0	0
ENSMUSG00000084970	1700060J05Rik	RIKEN cDNA 1700060J05 gene [Source:MGI Symbol;Acc:MGI:1920641]	4	1060	0.471698	0	0	0	2	1	0
ENSMUSG00000099407	1700060O08Rik	RIKEN cDNA 1700060O08 gene [Source:MGI Symbol;Acc:MGI:1914585]	12	281	0.469751	0	0	0	0	0	0
ENSMUSG00000117966	1700061A03Rik	RIKEN cDNA 1700061A03 gene [Source:MGI Symbol;Acc:MGI:1920664]	19	455	0.536264	2	4	4	2	6	5
ENSMUSG00000102060	1700061E17Rik	RIKEN cDNA 1700061E17 gene [Source:MGI Symbol;Acc:MGI:3642196]	9	1067	0.499531	5	1	6	2	0	0
ENSMUSG00000085759	1700061E18Rik	RIKEN cDNA 1700061E18 gene [Source:MGI Symbol;Acc:MGI:1924241]	13	588	0.460884	0	0	0	0	0	0
ENSMUSG00000085580	1700061F12Rik	RIKEN cDNA 1700061F12 gene [Source:MGI Symbol;Acc:MGI:1920688]	2	876	0.438356	0	0	0	0	0	0
ENSMUSG00000084948	1700061H18Rik	RIKEN cDNA 1700061H18 gene [Source:MGI Symbol;Acc:MGI:1920711]	18	1081	0.398705	0	0	0	0	0	0
ENSMUSG00000028009	1700061I17Rik	RIKEN cDNA 1700061I17 gene [Source:MGI Symbol;Acc:MGI:1920612]	3	1962	0.448522	3	0	0	5	0	0
ENSMUSG00000086366	1700061J23Rik	RIKEN cDNA 1700061J23 gene [Source:MGI Symbol;Acc:MGI:1924243]	11	537	0.469274	0	0	0	0	0	0
ENSMUSG00000110464	1700061N14Rik	RIKEN cDNA 1700061N14 gene [Source:MGI Symbol;Acc:MGI:1920682]	8	463	0.479482	1	0	1	11	7	0
ENSMUSG00000114390	1700062C10Rik	RIKEN cDNA 1700062C10 gene [Source:MGI Symbol;Acc:MGI:1920690]	14	1659	0.414105	0	0	0	0	2	0
ENSMUSG00000100062	1700063A18Rik	RIKEN cDNA 1700063A18 gene [Source:MGI Symbol;Acc:MGI:1920704]	1	356	0.426966	0	0	0	0	0	0
ENSMUSG00000100837	1700063D05Rik	RIKEN cDNA 1700063D05 gene [Source:MGI Symbol;Acc:MGI:1925750]	9	1529	0.489209	0	0	0	1	0	0
ENSMUSG00000040657	1700063H04Rik	RIKEN cDNA 1700063H04 gene [Source:MGI Symbol;Acc:MGI:1921519]	6	817	0.501836	0	0	0	4	1	2
ENSMUSG00000099266	1700063H06Rik	RIKEN cDNA 1700063H06 gene [Source:MGI Symbol;Acc:MGI:1920614]	9	445	0.388764	0	0	0	0	0	0
ENSMUSG00000103463	1700063I16Rik	RIKEN cDNA 1700063I16 gene [Source:MGI Symbol;Acc:MGI:1925877]	1	611	0.481178	0	0	0	0	0	0
ENSMUSG00000117080	1700063J08Rik	RIKEN cDNA 1700063J08 gene [Source:MGI Symbol;Acc:MGI:1920700]	17	554	0.554152	6	3	1	10	3	1
ENSMUSG00000102036	1700063K16Rik	RIKEN cDNA 1700063K16 gene [Source:MGI Symbol;Acc:MGI:1923860]	16	1203	0.413965	0	0	0	0	0	0
ENSMUSG00000101978	1700063O14Rik	RIKEN cDNA 1700063O14 gene [Source:MGI Symbol;Acc:MGI:1920702]	5	492	0.457317	0	0	0	1	0	0
ENSMUSG00000082766	1700064H15Rik	RIKEN cDNA 1700064H15 gene [Source:MGI Symbol;Acc:MGI:1920674]	3	394	0.456853	0	0	1	2	0	0
ENSMUSG00000100681	1700064J06Rik	RIKEN cDNA 1700064J06 gene [Source:MGI Symbol;Acc:MGI:1920650]	10	386	0.476684	0	0	0	0	0	0
ENSMUSG00000100211	1700064M15Rik	RIKEN cDNA 1700064M15 gene [Source:MGI Symbol;Acc:MGI:1920707]	12	645	0.505426	0	0	0	0	0	2
ENSMUSG00000096655	1700065D16Rik	RIKEN cDNA 1700065D16 gene [Source:MGI Symbol;Acc:MGI:1920660]	9	2905	0.521859	0	0	0	0	7	12
ENSMUSG00000099435	1700065I16Rik	RIKEN cDNA 1700065I16 gene [Source:MGI Symbol;Acc:MGI:1925712]	15	997	0.560682	0	0	0	0	0	0
ENSMUSG00000107341	1700065J11Rik	RIKEN cDNA 1700065J11 gene [Source:MGI Symbol;Acc:MGI:1920659]	6	424	0.471698	0	0	0	1	0	0
ENSMUSG00000100872	1700065J18Rik	RIKEN cDNA 1700065J18 gene [Source:MGI Symbol;Acc:MGI:1920705]	1	393	0.483461	0	0	0	0	0	0
ENSMUSG00000107408	1700065L07Rik	RIKEN cDNA 1700065L07 gene [Source:MGI Symbol;Acc:MGI:1920658]	6	614	0.47557	0	0	0	2	0	0
ENSMUSG00000100134	1700065O20Rik	RIKEN cDNA 1700065O20 gene [Source:MGI Symbol;Acc:MGI:1923859]	18	710	0.412676	0	0	0	0	0	0
ENSMUSG00000101634	1700066B17Rik	RIKEN cDNA 1700066B17 gene [Source:MGI Symbol;Acc:MGI:1920676]	1	1068	0.465356	0	0	0	3	0	0
ENSMUSG00000073598	1700066B19Rik	RIKEN cDNA 1700066B19 gene [Source:MGI Symbol;Acc:MGI:1920699]	18	2837	0.542122	0	4	4	3	0	0
ENSMUSG00000101810	1700066C05Rik	RIKEN cDNA 1700066C05 gene [Source:MGI Symbol;Acc:MGI:1925904]	16	407	0.493857	0	0	0	0	0	0
ENSMUSG00000097717	1700066J03Rik	RIKEN cDNA 1700066J03 gene [Source:MGI Symbol;Acc:MGI:1914589]	13	850	0.502353	0	8	0	2	2	0
ENSMUSG00000038323	1700066M21Rik	RIKEN cDNA 1700066M21 gene [Source:MGI Symbol;Acc:MGI:1920717]	1	3235	0.411747	36	30	107	46	13	42
ENSMUSG00000099605	1700066N21Rik	RIKEN cDNA 1700066N21 gene [Source:MGI Symbol;Acc:MGI:1920721]	5	783	0.404853	0	0	0	0	0	0
ENSMUSG00000085800	1700066O22Rik	RIKEN cDNA 1700066O22 gene [Source:MGI Symbol;Acc:MGI:1920651]	18	2146	0.437558	1	0	0	0	0	0
ENSMUSG00000099378	1700067G17Rik	RIKEN cDNA 1700067G17 gene [Source:MGI Symbol;Acc:MGI:1920725]	1	603	0.475954	0	0	0	0	0	0
ENSMUSG00000046408	1700067K01Rik	RIKEN cDNA 1700067K01 gene [Source:MGI Symbol;Acc:MGI:1920703]	8	1957	0.586101	0	0	0	0	3	0
ENSMUSG00000021545	1700067P10Rik	RIKEN cDNA 1700067P10 gene [Source:MGI Symbol;Acc:MGI:1915474]	17	1437	0.506611	6	0	0	0	0	0
ENSMUSG00000053081	1700069B07Rik	RIKEN cDNA 1700069B07 gene [Source:MGI Symbol;Acc:MGI:1923863]	7	939	0.619808	4	0	0	0	0	0
ENSMUSG00000042184	1700069L16Rik	RIKEN cDNA 1700069L16 gene [Source:MGI Symbol;Acc:MGI:1920726]	5	1520	0.521711	0	0	0	0	0	0
ENSMUSG00000107637	1700069P05Rik	RIKEN cDNA 1700069P05 gene [Source:MGI Symbol;Acc:MGI:1920781]	6	785	0.50828	0	0	0	0	0	0
ENSMUSG00000086376	1700071G01Rik	RIKEN cDNA 1700071G01 gene [Source:MGI Symbol;Acc:MGI:1920735]	5	367	0.452316	0	0	1	0	0	0
ENSMUSG00000080980	1700071K01Rik	RIKEN cDNA 1700071K01 gene [Source:MGI Symbol;Acc:MGI:3588264]	11	819	0.545788	8	4	27	10	10	3
ENSMUSG00000090307	1700071M16Rik	RIKEN cDNA 1700071M16 gene [Source:MGI Symbol;Acc:MGI:1920754]	17	2883	0.42768	3	0	1	3	2	1
ENSMUSG00000100487	1700072B07Rik	RIKEN cDNA 1700072B07 gene [Source:MGI Symbol;Acc:MGI:1920779]	9	445	0.525843	0	0	0	0	0	0
ENSMUSG00000101702	1700072G22Rik	RIKEN cDNA 1700072G22 gene [Source:MGI Symbol;Acc:MGI:1920746]	1	548	0.432482	0	0	0	0	0	0
ENSMUSG00000107744	1700072O05Rik	RIKEN cDNA 1700072O05 gene [Source:MGI Symbol;Acc:MGI:1920755]	6	321	0.489097	0	0	0	0	0	0
ENSMUSG00000087204	1700073E17Rik	RIKEN cDNA 1700073E17 gene [Source:MGI Symbol;Acc:MGI:1920734]	6	1265	0.469565	0	0	0	1	0	0
ENSMUSG00000102231	1700074A21Rik	RIKEN cDNA 1700074A21 gene [Source:MGI Symbol;Acc:MGI:1920732]	1	346	0.393064	0	0	0	0	0	0
ENSMUSG00000099872	1700074H08Rik	RIKEN cDNA 1700074H08 gene [Source:MGI Symbol;Acc:MGI:1920730]	13	555	0.425225	0	0	0	1	0	0
ENSMUSG00000029883	1700074P13Rik	RIKEN cDNA 1700074P13 gene [Source:MGI Symbol;Acc:MGI:1920731]	6	1844	0.395336	0	0	0	0	0	0
ENSMUSG00000117741	1700080C20Rik	RIKEN cDNA 1700080C20 gene [Source:MGI Symbol;Acc:MGI:1925882]	17	186	0.462366	1	0	0	0	0	0
ENSMUSG00000084859	1700080N15Rik	RIKEN cDNA 1700080N15 gene [Source:MGI Symbol;Acc:MGI:1920739]	2	1465	0.430717	0	0	0	1	0	0
ENSMUSG00000105673	1700081B01Rik	RIKEN cDNA 1700081B01 gene [Source:MGI Symbol;Acc:MGI:1920750]	5	769	0.508453	0	0	0	0	0	0
ENSMUSG00000100573	1700081H04Rik	RIKEN cDNA 1700081H04 gene [Source:MGI Symbol;Acc:MGI:1920727]	5	1128	0.492021	0	0	0	0	0	0
ENSMUSG00000113209	1700081N11Rik	RIKEN cDNA 1700081N11 gene [Source:MGI Symbol;Acc:MGI:1920778]	12	688	0.545058	8	13	28	14	4	10
ENSMUSG00000023737	1700082M22Rik	RIKEN cDNA 1700082M22 gene [Source:MGI Symbol;Acc:MGI:1920784]	8	2210	0.403167	3	2	0	0	8	0
ENSMUSG00000100668	1700083H02Rik	RIKEN cDNA 1700083H02 gene [Source:MGI Symbol;Acc:MGI:1914598]	12	637	0.409733	0	0	0	0	0	0
ENSMUSG00000086016	1700084C06Rik	RIKEN cDNA 1700084C06 gene [Source:MGI Symbol;Acc:MGI:1923868]	9	750	0.537333	2	8	1	5	1	0
ENSMUSG00000114333	1700084D21Rik	RIKEN cDNA 1700084D21 gene [Source:MGI Symbol;Acc:MGI:1923970]	13	444	0.484234	2	0	0	0	0	0
ENSMUSG00000100747	1700084E18Rik	RIKEN cDNA 1700084E18 gene [Source:MGI Symbol;Acc:MGI:1914600]	2	1429	0.621414	4	1	7	8	16	19
ENSMUSG00000099639	1700084F23Rik	RIKEN cDNA 1700084F23 gene [Source:MGI Symbol;Acc:MGI:1921530]	13	2105	0.463183	0	0	6	0	0	0
ENSMUSG00000058101	1700084J12Rik	RIKEN cDNA 1700084J12 gene [Source:MGI Symbol;Acc:MGI:1920736]	15	1992	0.4749	0	0	0	0	0	0
ENSMUSG00000057805	1700084M14Rik	RIKEN cDNA 1700084M14 gene [Source:MGI Symbol;Acc:MGI:1920737]	X	559	0.429338	0	0	0	0	0	0
ENSMUSG00000100890	1700085C21Rik	RIKEN cDNA 1700085C21 gene [Source:MGI Symbol;Acc:MGI:1921533]	12	1082	0.48244	0	0	0	0	0	0
ENSMUSG00000115693	1700085D07Rik	RIKEN cDNA 1700085D07 gene [Source:MGI Symbol;Acc:MGI:1920741]	15	318	0.465409	0	0	1	0	0	0
ENSMUSG00000020548	1700086D15Rik	RIKEN cDNA 1700086D15 gene [Source:MGI Symbol;Acc:MGI:1921532]	11	1093	0.504117	19	24	23	28	31	11
ENSMUSG00000071265	1700086L19Rik	RIKEN cDNA 1700086L19 gene [Source:MGI Symbol;Acc:MGI:1921534]	12	1075	0.47814	11	2	5	6	11	7
ENSMUSG00000097080	1700086O06Rik	RIKEN cDNA 1700086O06 gene [Source:MGI Symbol;Acc:MGI:1920766]	18	2027	0.523434	15	27	14	17	10	23
ENSMUSG00000085085	1700086P04Rik	RIKEN cDNA 1700086P04 gene [Source:MGI Symbol;Acc:MGI:1914599]	4	1009	0.46779	0	0	5	1	0	0
ENSMUSG00000115099	1700087I21Rik	RIKEN cDNA 1700087I21 gene [Source:MGI Symbol;Acc:MGI:1923869]	14	4145	0.454282	64	45	45	68	53	51
ENSMUSG00000115723	1700087M22Rik	RIKEN cDNA 1700087M22 gene [Source:MGI Symbol;Acc:MGI:1925717]	14	208	0.418269	0	0	0	0	0	0
ENSMUSG00000033029	1700088E04Rik	RIKEN cDNA 1700088E04 gene [Source:MGI Symbol;Acc:MGI:1920774]	15	5292	0.550454	32	20	54	41	36	14
ENSMUSG00000090462	1700091H14Rik	RIKEN cDNA 1700091H14 gene [Source:MGI Symbol;Acc:MGI:1920803]	14	1391	0.435658	0	0	0	0	0	0
ENSMUSG00000086781	1700092C02Rik	RIKEN cDNA 1700092C02 gene [Source:MGI Symbol;Acc:MGI:1914607]	8	359	0.431755	0	0	0	0	0	0
ENSMUSG00000092499	1700092C10Rik	RIKEN cDNA 1700092C10 gene [Source:MGI Symbol;Acc:MGI:1920804]	14	585	0.505983	0	0	0	0	0	0
ENSMUSG00000085353	1700092C17Rik	RIKEN cDNA 1700092C17 gene [Source:MGI Symbol;Acc:MGI:1921545]	2	424	0.471698	0	0	0	0	0	0
ENSMUSG00000111487	1700092E16Rik	RIKEN cDNA 1700092E16 gene [Source:MGI Symbol;Acc:MGI:1921541]	10	753	0.480744	0	0	0	0	0	0
ENSMUSG00000084811	1700092E19Rik	RIKEN cDNA 1700092E19 gene [Source:MGI Symbol;Acc:MGI:1920826]	13	2006	0.454138	0	0	0	0	0	0
ENSMUSG00000078600	1700092K14Rik	RIKEN cDNA 1700092K14 gene [Source:MGI Symbol;Acc:MGI:1920786]	11	395	0.506329	0	0	0	0	0	2
[truncated: 53,417 more rows]

## Sheet: All Present Genes
gene_id	SYMBOL	DESCRIPTION	SEQNAME	Fold_Change	PValue	FDR	WT_6H_Avg_FPKM	FB_6H_Avg_FPKM
ENSMUSG00000064360	mt-Nd3	mitochondrially encoded NADH dehydrogenase 3 [Source:MGI Symbol;Acc:MGI:102499]	MT	76.6951	2.04528e-46	3.30415e-42	1.21859	97.3254
ENSMUSG00000068396	Rpl34-ps1	ribosomal protein L34, pseudogene 1 [Source:MGI Symbol;Acc:MGI:3704270]	6	137.461	7.16807e-46	5.79001e-42	0.876693	124.434
ENSMUSG00000107092	Gm7993	predicted gene 7993 [Source:MGI Symbol;Acc:MGI:3647399]	5	473.955	1.29398e-43	6.96809e-40	0.0469443	25.1322
ENSMUSG00000033633	Clec18a	C-type lectin domain family 18, member A [Source:MGI Symbol;Acc:MGI:2672935]	8	10.9115	1.57526e-31	6.36209e-28	1.07	11.7191
ENSMUSG00000022324	Matn2	matrilin 2 [Source:MGI Symbol;Acc:MGI:109613]	15	7.68989	1.04974e-30	3.39172e-27	2.22114	17.0846
ENSMUSG00000059751	Rps3a3	ribosomal protein S3A3 [Source:MGI Symbol;Acc:MGI:3643406]	13	33.6199	8.73656e-29	2.35232e-25	0.85819	29.2553
ENSMUSG00000075707	Dio3	deiodinase, iodothyronine type III [Source:MGI Symbol;Acc:MGI:1306782]	12	26.9965	1.81492e-27	4.18859e-24	0.38875	10.7499
ENSMUSG00000044393	Dsg2	desmoglein 2 [Source:MGI Symbol;Acc:MGI:1196466]	18	13.7844	3.19675e-27	6.45543e-24	0.364522	5.06687
ENSMUSG00000029661	Col1a2	collagen, type I, alpha 2 [Source:MGI Symbol;Acc:MGI:88468]	6	11.0292	4.30798e-27	7.73282e-24	0.947479	10.4849
ENSMUSG00000021186	Fbln5	fibulin 5 [Source:MGI Symbol;Acc:MGI:1346091]	12	8.80643	5.00084e-23	8.07886e-20	0.511681	4.53907
ENSMUSG00000034687	Fras1	Fraser extracellular matrix complex subunit 1 [Source:MGI Symbol;Acc:MGI:2385368]	5	5.69681	1.06796e-22	1.56845e-19	2.3664	13.4836
ENSMUSG00000041559	Fmod	fibromodulin [Source:MGI Symbol;Acc:MGI:1328364]	1	5.06166	9.5039e-22	1.27946e-18	20.039	101.433
ENSMUSG00000027358	Bmp2	bone morphogenetic protein 2 [Source:MGI Symbol;Acc:MGI:88177]	2	5.66601	2.31734e-21	2.82708e-18	5.5312	31.3816
ENSMUSG00000042436	Mfap4	microfibrillar-associated protein 4 [Source:MGI Symbol;Acc:MGI:1342276]	11	11.0393	2.44996e-21	2.82708e-18	10.374	114.757
ENSMUSG00000024827	Gldc	glycine decarboxylase [Source:MGI Symbol;Acc:MGI:1341155]	19	7.01514	1.59749e-20	1.7205e-17	6.19451	43.4909
ENSMUSG00000035200	Chrnb4	cholinergic receptor, nicotinic, beta polypeptide 4 [Source:MGI Symbol;Acc:MGI:87892]	9	7.78274	2.14539e-20	2.16617e-17	1.23852	9.70535
ENSMUSG00000020695	Mrc2	mannose receptor, C type 2 [Source:MGI Symbol;Acc:MGI:107818]	11	6.49932	2.83138e-20	2.69065e-17	1.99985	13.0239
ENSMUSG00000036103	Colec12	collectin sub-family member 12 [Source:MGI Symbol;Acc:MGI:2152907]	18	5.12498	1.1447e-19	1.02737e-16	1.55807	8.00253
ENSMUSG00000029843	Slc13a4	solute carrier family 13 (sodium/sulfate symporters), member 4 [Source:MGI Symbol;Acc:MGI:2442367]	6	10.425	3.72016e-18	3.16311e-15	3.48426	36.4145
ENSMUSG00000026483	Niban1	niban apoptosis regulator 1 [Source:MGI Symbol;Acc:MGI:2137237]	1	8.02973	5.28632e-18	4.27002e-15	7.25384	58.2902
ENSMUSG00000054537	Tmprss11e	transmembrane protease, serine 11e [Source:MGI Symbol;Acc:MGI:3513175]	5	9.81188	9.64799e-18	7.42206e-15	0.520112	5.18571
ENSMUSG00000030108	Slc6a13	solute carrier family 6 (neurotransmitter transporter, GABA), member 13 [Source:MGI Symbol;Acc:MGI:95629]	6	12.6423	1.70581e-17	1.25261e-14	2.67811	33.9795
ENSMUSG00000018339	Gpx3	glutathione peroxidase 3 [Source:MGI Symbol;Acc:MGI:105102]	11	13.1901	2.00556e-17	1.38083e-14	55.7707	735.902
ENSMUSG00000024913	Lrp5	low density lipoprotein receptor-related protein 5 [Source:MGI Symbol;Acc:MGI:1278315]	19	4.69308	2.10771e-17	1.38083e-14	1.39651	6.56389
ENSMUSG00000030111	A2m	alpha-2-macroglobulin [Source:MGI Symbol;Acc:MGI:2449119]	6	4.24596	2.13684e-17	1.38083e-14	4.10397	17.4339
ENSMUSG00000066058	Cldn19	claudin 19 [Source:MGI Symbol;Acc:MGI:3033992]	4	7.22857	3.37495e-17	2.09701e-14	1.1486	8.34374
ENSMUSG00000024598	Fbn2	fibrillin 2 [Source:MGI Symbol;Acc:MGI:95490]	18	14.2659	6.01484e-17	3.59888e-14	0.614855	8.80644
ENSMUSG00000087684	1200007C13Rik	RIKEN cDNA 1200007C13 gene [Source:MGI Symbol;Acc:MGI:1921369]	2	7.04719	6.91181e-17	3.95764e-14	2.17765	15.3776
ENSMUSG00000002980	Bcam	basal cell adhesion molecule [Source:MGI Symbol;Acc:MGI:1929940]	7	6.79916	7.1044e-17	3.95764e-14	3.5915	24.4825
ENSMUSG00000033377	Palmd	palmdelphin [Source:MGI Symbol;Acc:MGI:2148896]	3	8.949	8.62555e-17	4.64486e-14	0.425919	3.85284
ENSMUSG00000073418	C4b	complement component 4B (Chido blood group) [Source:MGI Symbol;Acc:MGI:88228]	17	4.48588	9.94369e-17	5.18195e-14	3.5893	16.1284
ENSMUSG00000046808	Atp10d	ATPase, class V, type 10D [Source:MGI Symbol;Acc:MGI:2450125]	5	7.74769	1.58714e-16	8.01256e-14	0.649823	5.03722
ENSMUSG00000102752	Gm7694	predicted gene 7694 [Source:MGI Symbol;Acc:MGI:3649135]	1	3.96335	1.77182e-16	8.67386e-14	6.53896	25.9157
ENSMUSG00000052819	Best2	bestrophin 2 [Source:MGI Symbol;Acc:MGI:2387588]	8	8.31562	2.28363e-16	1.08506e-13	2.489	20.817
ENSMUSG00000082100	Glns-ps1	glutamine synthetase pseudogene 1 [Source:MGI Symbol;Acc:MGI:95740]	11	136.841	3.3469e-16	1.54483e-13	0.0550648	8.93648
ENSMUSG00000047230	Cldn2	claudin 2 [Source:MGI Symbol;Acc:MGI:1276110]	X	11.2017	5.33834e-16	2.39558e-13	1.60874	18.1402
ENSMUSG00000006369	Fbln1	fibulin 1 [Source:MGI Symbol;Acc:MGI:95487]	15	10.8914	5.63572e-16	2.46068e-13	31.8576	347.058
ENSMUSG00000037003	Tns2	tensin 2 [Source:MGI Symbol;Acc:MGI:2387586]	15	3.52562	9.5135e-16	4.04449e-13	6.22158	21.9469
ENSMUSG00000025790	Slco3a1	solute carrier organic anion transporter family, member 3a1 [Source:MGI Symbol;Acc:MGI:1351867]	7	5.60962	1.55144e-15	6.42656e-13	1.10673	6.2315
ENSMUSG00000021680	Crhbp	corticotropin releasing hormone binding protein [Source:MGI Symbol;Acc:MGI:88497]	13	9.31918	1.85674e-15	7.49893e-13	9.96238	93.0207
ENSMUSG00000047793	Sned1	sushi, nidogen and EGF-like domains 1 [Source:MGI Symbol;Acc:MGI:3045960]	1	8.45686	4.74719e-15	1.87051e-12	20.6547	174.706
ENSMUSG00000038473	Nos1ap	nitric oxide synthase 1 (neuronal) adaptor protein [Source:MGI Symbol;Acc:MGI:1917979]	1	3.91333	5.00049e-15	1.9234e-12	3.88003	15.1864
ENSMUSG00000009281	Rarres2	retinoic acid receptor responder (tazarotene induced) 2 [Source:MGI Symbol;Acc:MGI:1918910]	6	9.73222	6.05322e-15	2.27418e-12	1.99205	19.5211
ENSMUSG00000036972	Zic4	zinc finger protein of the cerebellum 4 [Source:MGI Symbol;Acc:MGI:107201]	9	9.0617	6.76795e-15	2.48492e-12	0.238429	2.18788
ENSMUSG00000023885	Thbs2	thrombospondin 2 [Source:MGI Symbol;Acc:MGI:98738]	17	7.02754	7.7496e-15	2.76976e-12	0.434639	3.07643
ENSMUSG00000004105	Angptl2	angiopoietin-like 2 [Source:MGI Symbol;Acc:MGI:1347002]	2	6.38634	7.88667e-15	2.76976e-12	1.31367	8.38038
ENSMUSG00000027070	Lrp2	low density lipoprotein receptor-related protein 2 [Source:MGI Symbol;Acc:MGI:95794]	2	5.55166	8.33937e-15	2.81264e-12	2.47237	13.7366
ENSMUSG00000113581	Dio3os	deiodinase, iodothyronine type III, opposite strand [Source:MGI Symbol;Acc:MGI:2664395]	12	9.87404	8.35696e-15	2.81264e-12	0.721392	7.24605
ENSMUSG00000047787	Flrt1	fibronectin leucine rich transmembrane protein 1 [Source:MGI Symbol;Acc:MGI:3026647]	19	4.51215	8.8516e-15	2.91832e-12	5.42496	24.5053
ENSMUSG00000024610	Cd74	CD74 antigen (invariant polypeptide of major histocompatibility complex, class II antigen-associated) [Source:MGI Symbol;Acc:MGI:96534]	18	5.8209	1.02573e-14	3.31412e-12	4.91101	28.717
ENSMUSG00000027684	Mecom	MDS1 and EVI1 complex locus [Source:MGI Symbol;Acc:MGI:95457]	3	8.74074	1.2507e-14	3.96177e-12	0.384266	3.38543
ENSMUSG00000020467	Efemp1	epidermal growth factor-containing fibulin-like extracellular matrix protein 1 [Source:MGI Symbol;Acc:MGI:1339998]	11	7.37313	1.43461e-14	4.45694e-12	18.336	135.337
ENSMUSG00000056222	Spock1	sparc/osteonectin, cwcv and kazal-like domains proteoglycan 1 [Source:MGI Symbol;Acc:MGI:105371]	13	3.42474	2.00729e-14	6.11845e-12	8.06466	27.6248
ENSMUSG00000044177	Wfikkn2	WAP, follistatin/kazal, immunoglobulin, kunitz and netrin domain containing 2 [Source:MGI Symbol;Acc:MGI:2669209]	11	7.57087	2.43246e-14	7.27712e-12	0.990403	7.56292
ENSMUSG00000023915	Tnfrsf21	tumor necrosis factor receptor superfamily, member 21 [Source:MGI Symbol;Acc:MGI:2151075]	17	6.82211	3.01589e-14	8.8585e-12	7.21867	49.2927
ENSMUSG00000044461	Shisa2	shisa family member 2 [Source:MGI Symbol;Acc:MGI:2444716]	14	5.45523	3.12258e-14	9.0081e-12	3.30521	18.0787
ENSMUSG00000021614	Vcan	versican [Source:MGI Symbol;Acc:MGI:102889]	13	10.004	4.23134e-14	1.19925e-11	4.906	49.1025
ENSMUSG00000021676	Iqgap2	IQ motif containing GTPase activating protein 2 [Source:MGI Symbol;Acc:MGI:2449975]	13	6.05802	4.42065e-14	1.2313e-11	8.08817	49.0329
ENSMUSG00000026579	F5	coagulation factor V [Source:MGI Symbol;Acc:MGI:88382]	1	10.898	4.52308e-14	1.23848e-11	6.39427	69.7351
ENSMUSG00000026837	Col5a1	collagen, type V, alpha 1 [Source:MGI Symbol;Acc:MGI:88457]	2	4.41285	6.38855e-14	1.72012e-11	3.6236	16.002
ENSMUSG00000063796	Slc22a8	solute carrier family 22 (organic anion transporter), member 8 [Source:MGI Symbol;Acc:MGI:1336187]	19	10.4992	7.68568e-14	2.03544e-11	1.19223	12.6065
ENSMUSG00000055254	Ntrk2	neurotrophic tyrosine kinase, receptor, type 2 [Source:MGI Symbol;Acc:MGI:97384]	13	7.03045	8.04149e-14	2.09533e-11	2.93604	20.6555
ENSMUSG00000041577	Prelp	proline arginine-rich end leucine-rich repeat [Source:MGI Symbol;Acc:MGI:2151110]	1	5.81118	1.21144e-13	3.10647e-11	14.4373	83.9564
ENSMUSG00000071847	Apcdd1	adenomatosis polyposis coli down-regulated 1 [Source:MGI Symbol;Acc:MGI:3513977]	18	4.5303	1.62521e-13	4.10239e-11	0.877466	3.98322
ENSMUSG00000053420	Gm4792	predicted gene 4792 [Source:MGI Symbol;Acc:MGI:3648918]	10	-26.0914	1.66406e-13	4.13584e-11	12.3858	0.453024
ENSMUSG00000055489	Ano5	anoctamin 5 [Source:MGI Symbol;Acc:MGI:3576659]	7	55.1226	2.11626e-13	5.16629e-11	0.00754471	0.512044
ENSMUSG00000010311	Optc	opticin [Source:MGI Symbol;Acc:MGI:2151113]	1	12.538	2.14263e-13	5.16629e-11	24.936	312.822
ENSMUSG00000063564	Col23a1	collagen, type XXIII, alpha 1 [Source:MGI Symbol;Acc:MGI:2653243]	11	6.35476	2.30922e-13	5.4861e-11	11.2388	71.4617
ENSMUSG00000027204	Fbn1	fibrillin 1 [Source:MGI Symbol;Acc:MGI:95489]	2	12.3797	2.72585e-13	6.38204e-11	8.51601	105.456
ENSMUSG00000032368	Zic1	zinc finger protein of the cerebellum 1 [Source:MGI Symbol;Acc:MGI:106683]	9	7.63828	2.98135e-13	6.88053e-11	1.73014	13.2641
ENSMUSG00000075463	4930594M22Rik	RIKEN cDNA 4930594M22 gene [Source:MGI Symbol;Acc:MGI:1925478]	14	5.16886	3.07954e-13	7.00704e-11	2.26526	11.7439
ENSMUSG00000061718	Ppp1r1b	protein phosphatase 1, regulatory inhibitor subunit 1B [Source:MGI Symbol;Acc:MGI:94860]	11	7.52542	3.47186e-13	7.78998e-11	2.40649	18.1983
ENSMUSG00000062611	Rps3a2	ribosomal protein S3A2 [Source:MGI Symbol;Acc:MGI:3642853]	14	52.4639	4.33291e-13	9.58878e-11	0.116596	6.88822
ENSMUSG00000037656	Slc20a2	solute carrier family 20, member 2 [Source:MGI Symbol;Acc:MGI:97851]	8	3.35593	4.79138e-13	1.04601e-10	8.01513	26.8997
ENSMUSG00000066842	Hmcn1	hemicentin 1 [Source:MGI Symbol;Acc:MGI:2685047]	1	4.41411	5.05623e-13	1.08911e-10	0.952857	4.20294
ENSMUSG00000001870	Ltbp1	latent transforming growth factor beta binding protein 1 [Source:MGI Symbol;Acc:MGI:109151]	17	3.67489	6.20486e-13	1.31894e-10	6.74713	24.7917
ENSMUSG00000027536	Chmp4c	charged multivesicular body protein 4C [Source:MGI Symbol;Acc:MGI:1913621]	3	4.57815	6.38036e-13	1.33863e-10	0.895554	4.10396
ENSMUSG00000070498	Tmem132b	transmembrane protein 132B [Source:MGI Symbol;Acc:MGI:3609245]	5	5.6559	6.70416e-13	1.38854e-10	3.53906	20.0367
ENSMUSG00000055874	Foxi3	forkhead box I3 [Source:MGI Symbol;Acc:MGI:3511278]	6	14.8013	6.8715e-13	1.39247e-10	0.827653	12.4588
ENSMUSG00000033386	Frrs1	ferric-chelate reductase 1 [Source:MGI Symbol;Acc:MGI:108076]	3	5.90855	6.89555e-13	1.39247e-10	0.470121	2.78981
ENSMUSG00000066113	Adamtsl1	ADAMTS-like 1 [Source:MGI Symbol;Acc:MGI:1924989]	4	5.41285	7.47693e-13	1.49123e-10	1.32364	7.17699
ENSMUSG00000052957	Gas1	growth arrest specific 1 [Source:MGI Symbol;Acc:MGI:95655]	13	6.22263	9.72278e-13	1.91551e-10	6.87694	42.8388
ENSMUSG00000050671	Ism2	isthmin 2 [Source:MGI Symbol;Acc:MGI:2685110]	12	12.7436	1.01725e-12	1.97996e-10	0.817203	10.5109
ENSMUSG00000045573	Penk	preproenkephalin [Source:MGI Symbol;Acc:MGI:104629]	4	4.84208	1.12396e-12	2.16162e-10	116.35	563.478
ENSMUSG00000061524	Zic2	zinc finger protein of the cerebellum 2 [Source:MGI Symbol;Acc:MGI:106679]	14	5.70174	1.2177e-12	2.31434e-10	3.01237	17.2397
ENSMUSG00000007097	Atp1a2	ATPase, Na+/K+ transporting, alpha 2 polypeptide [Source:MGI Symbol;Acc:MGI:88106]	1	9.63815	1.26092e-12	2.36862e-10	39.1587	377.465
ENSMUSG00000002020	Ltbp2	latent transforming growth factor beta binding protein 2 [Source:MGI Symbol;Acc:MGI:99502]	12	10.7081	1.37294e-12	2.54941e-10	6.72333	72.0403
ENSMUSG00000031210	Gpr165	G protein-coupled receptor 165 [Source:MGI Symbol;Acc:MGI:1923456]	X	8.96989	1.46248e-12	2.68482e-10	0.612519	5.55267
ENSMUSG00000029838	Ptn	pleiotrophin [Source:MGI Symbol;Acc:MGI:97804]	6	3.13493	1.69417e-12	3.0752e-10	23.9104	74.9728
ENSMUSG00000059049	Frem1	Fras1 related extracellular matrix protein 1 [Source:MGI Symbol;Acc:MGI:2670972]	4	4.76084	1.72054e-12	3.08837e-10	1.42753	6.80861
ENSMUSG00000002985	Apoe	apolipoprotein E [Source:MGI Symbol;Acc:MGI:88057]	7	6.2517	1.79426e-12	3.18531e-10	342.969	2144.25
ENSMUSG00000021806	Nid2	nidogen 2 [Source:MGI Symbol;Acc:MGI:1298229]	14	10.5826	2.32089e-12	4.07544e-10	1.5901	16.8996
ENSMUSG00000029831	Npvf	neuropeptide VF precursor [Source:MGI Symbol;Acc:MGI:1926488]	6	10.1302	2.64977e-12	4.55415e-10	2.85468	29.3232
ENSMUSG00000042429	Adora1	adenosine A1 receptor [Source:MGI Symbol;Acc:MGI:99401]	1	4.51654	2.64989e-12	4.55415e-10	1.97911	8.95615
ENSMUSG00000025810	Nrp1	neuropilin 1 [Source:MGI Symbol;Acc:MGI:106206]	8	3.72716	2.86612e-12	4.86913e-10	0.737963	2.7537
ENSMUSG00000050295	Foxc1	forkhead box C1 [Source:MGI Symbol;Acc:MGI:1347466]	13	6.07617	2.89345e-12	4.86913e-10	0.454092	2.75927
ENSMUSG00000048078	Tenm4	teneurin transmembrane protein 4 [Source:MGI Symbol;Acc:MGI:2447063]	7	3.83639	2.98205e-12	4.92084e-10	6.42984	24.6737
ENSMUSG00000068876	Cgn	cingulin [Source:MGI Symbol;Acc:MGI:1927237]	3	4.14256	2.9851e-12	4.92084e-10	8.46648	35.0969
ENSMUSG00000038146	Notch3	notch 3 [Source:MGI Symbol;Acc:MGI:99460]	17	7.04329	3.10474e-12	5.05062e-10	0.598374	4.24586
ENSMUSG00000033152	Podxl2	podocalyxin-like 2 [Source:MGI Symbol;Acc:MGI:2442488]	6	4.71495	3.12635e-12	5.05062e-10	13.5012	63.6879
ENSMUSG00000021567	Nkd2	naked cuticle 2 [Source:MGI Symbol;Acc:MGI:1919543]	13	6.46151	3.49134e-12	5.58442e-10	0.501553	3.27273
ENSMUSG00000068323	Slc4a5	solute carrier family 4, sodium bicarbonate cotransporter, member 5 [Source:MGI Symbol;Acc:MGI:2443220]	6	6.77144	4.03019e-12	6.33233e-10	7.92172	53.6869
ENSMUSG00000033350	Chst2	carbohydrate sulfotransferase 2 [Source:MGI Symbol;Acc:MGI:1891160]	9	3.39156	4.03733e-12	6.33233e-10	5.21777	17.7121
ENSMUSG00000022085	Pebp4	phosphatidylethanolamine binding protein 4 [Source:MGI Symbol;Acc:MGI:1920773]	14	26.8845	4.75265e-12	7.3826e-10	0.14183	4.11095
ENSMUSG00000036594	H2-Aa	histocompatibility 2, class II antigen A, alpha [Source:MGI Symbol;Acc:MGI:95895]	17	8.32063	5.07968e-12	7.81545e-10	0.380228	3.22044
ENSMUSG00000022687	Boc	biregional cell adhesion molecule-related/down-regulated by oncogenes (Cdon) binding protein [Source:MGI Symbol;Acc:MGI:2151153]	16	6.72716	5.54531e-12	8.45137e-10	2.16163	14.5947
ENSMUSG00000084939	Gm830	predicted gene 830 [Source:MGI Symbol;Acc:MGI:2685676]	4	38.2291	6.87594e-12	1.03814e-09	0.0351585	1.47125
ENSMUSG00000000957	Mmp14	matrix metallopeptidase 14 (membrane-inserted) [Source:MGI Symbol;Acc:MGI:101900]	14	3.73636	7.76269e-12	1.16117e-09	2.06744	7.74164
ENSMUSG00000000792	Slc5a5	solute carrier family 5 (sodium iodide symporter), member 5 [Source:MGI Symbol;Acc:MGI:2149330]	8	7.46656	8.50755e-12	1.26091e-09	1.40749	10.5698
ENSMUSG00000001435	Col18a1	collagen, type XVIII, alpha 1 [Source:MGI Symbol;Acc:MGI:88451]	10	10.7678	9.75306e-12	1.43237e-09	21.6831	233.531
ENSMUSG00000078234	Klhdc7a	kelch domain containing 7A [Source:MGI Symbol;Acc:MGI:2444612]	4	8.16852	1.46609e-11	2.13375e-09	0.529206	4.35983
ENSMUSG00000028532	Cachd1	cache domain containing 1 [Source:MGI Symbol;Acc:MGI:2444177]	4	3.62396	1.68526e-11	2.43084e-09	3.43196	12.4505
ENSMUSG00000059173	Pde1a	phosphodiesterase 1A, calmodulin-dependent [Source:MGI Symbol;Acc:MGI:1201792]	2	6.20381	1.88553e-11	2.69564e-09	1.32292	8.24567
ENSMUSG00000021750	Fam107a	family with sequence similarity 107, member A [Source:MGI Symbol;Acc:MGI:3041256]	14	5.63196	2.00653e-11	2.84347e-09	6.95537	39.2245
ENSMUSG00000027386	Fbln7	fibulin 7 [Source:MGI Symbol;Acc:MGI:1917620]	2	3.36657	2.51491e-11	3.5329e-09	2.97492	10.0346
ENSMUSG00000099696	2900052N01Rik	RIKEN cDNA 2900052N01 gene [Source:MGI Symbol;Acc:MGI:1920290]	9	8.78524	2.62212e-11	3.65176e-09	2.35894	20.8174
ENSMUSG00000042453	Reln	reelin [Source:MGI Symbol;Acc:MGI:103022]	5	7.65863	2.68555e-11	3.70813e-09	8.94189	68.4938
ENSMUSG00000072941	Sod3	superoxide dismutase 3, extracellular [Source:MGI Symbol;Acc:MGI:103181]	5	7.75457	2.94976e-11	4.03843e-09	8.97457	69.6708
ENSMUSG00000074170	Plekhf1	pleckstrin homology domain containing, family F (with FYVE domain) member 1 [Source:MGI Symbol;Acc:MGI:1919537]	7	6.79215	3.91105e-11	5.30949e-09	0.618292	4.22786
ENSMUSG00000050666	Vstm4	V-set and transmembrane domain containing 4 [Source:MGI Symbol;Acc:MGI:2444633]	14	3.66621	4.46749e-11	6.01435e-09	2.15283	7.90858
ENSMUSG00000053414	Hunk	hormonally upregulated Neu-associated kinase [Source:MGI Symbol;Acc:MGI:1347352]	16	2.85472	4.60928e-11	6.15397e-09	5.058	14.4458
ENSMUSG00000030109	Slc6a12	solute carrier family 6 (neurotransmitter transporter, betaine/GABA), member 12 [Source:MGI Symbol;Acc:MGI:95628]	6	10.2111	5.23677e-11	6.93443e-09	0.647721	6.7024
ENSMUSG00000032372	Plscr2	phospholipid scramblase 2 [Source:MGI Symbol;Acc:MGI:1270860]	9	12.1024	5.44484e-11	7.15133e-09	0.173951	2.14665
ENSMUSG00000097619	4833422M21Rik	RIKEN cDNA 4833422M21 gene [Source:MGI Symbol;Acc:MGI:1923018]	15	6.31522	7.2062e-11	9.3884e-09	0.261727	1.67104
ENSMUSG00000054226	Tprkb	Tp53rk binding protein [Source:MGI Symbol;Acc:MGI:1917036]	6	4.58584	7.8878e-11	1.01942e-08	4.16359	19.129
ENSMUSG00000021835	Bmp4	bone morphogenetic protein 4 [Source:MGI Symbol;Acc:MGI:88180]	14	6.21772	8.17871e-11	1.04863e-08	1.4548	9.11306
ENSMUSG00000027570	Col9a3	collagen, type IX, alpha 3 [Source:MGI Symbol;Acc:MGI:894686]	2	7.94528	8.90168e-11	1.12413e-08	4.74914	37.8003
ENSMUSG00000026991	Pkp4	plakophilin 4 [Source:MGI Symbol;Acc:MGI:109281]	2	3.08799	8.90676e-11	1.12413e-08	23.7934	73.4783
ENSMUSG00000041625	Ggact	gamma-glutamylamine cyclotransferase [Source:MGI Symbol;Acc:MGI:2385008]	14	3.41193	1.00457e-10	1.25805e-08	2.07341	7.08195
ENSMUSG00000097462	9530026P05Rik	RIKEN cDNA 9530026P05 gene [Source:MGI Symbol;Acc:MGI:1924659]	6	7.57239	1.0342e-10	1.2852e-08	0.251149	1.93349
ENSMUSG00000005917	Otx1	orthodenticle homeobox 1 [Source:MGI Symbol;Acc:MGI:97450]	11	11.1005	1.06235e-10	1.31009e-08	0.373739	4.20327
ENSMUSG00000006204	Cdcp3	CUB domain containing protein 3 [Source:MGI Symbol;Acc:MGI:1918645]	7	-5.43049	1.2703e-10	1.54303e-08	8.71268	1.60156
ENSMUSG00000038119	Cdon	cell adhesion molecule-related/down-regulated by oncogenes [Source:MGI Symbol;Acc:MGI:1926387]	9	3.07814	1.27033e-10	1.54303e-08	9.69371	29.8507
ENSMUSG00000064246	Chil1	chitinase-like 1 [Source:MGI Symbol;Acc:MGI:1340899]	1	10.5185	1.28079e-10	1.54412e-08	3.42159	36.091
ENSMUSG00000030306	Tmtc1	transmembrane and tetratricopeptide repeat containing 1 [Source:MGI Symbol;Acc:MGI:3039590]	6	4.85754	1.44285e-10	1.72661e-08	1.73363	8.44188
ENSMUSG00000039323	Igfbp2	insulin-like growth factor binding protein 2 [Source:MGI Symbol;Acc:MGI:96437]	1	5.37794	1.47528e-10	1.75244e-08	2.94912	15.9161
ENSMUSG00000028626	Col9a2	collagen, type IX, alpha 2 [Source:MGI Symbol;Acc:MGI:88466]	4	5.40516	1.51974e-10	1.78451e-08	6.40586	34.6927
ENSMUSG00000027524	Edn3	endothelin 3 [Source:MGI Symbol;Acc:MGI:95285]	2	16.9955	1.52437e-10	1.78451e-08	0.21517	3.75993
ENSMUSG00000020651	Slc26a4	solute carrier family 26, member 4 [Source:MGI Symbol;Acc:MGI:1346029]	12	13.0692	1.68872e-10	1.96269e-08	5.22569	68.4357
ENSMUSG00000021678	F2rl1	coagulation factor II (thrombin) receptor-like 1 [Source:MGI Symbol;Acc:MGI:101910]	13	7.55492	1.71566e-10	1.97974e-08	0.65285	4.96043
ENSMUSG00000108256	Gm43923	predicted gene, 43923 [Source:MGI Symbol;Acc:MGI:5690315]	6	13.4938	1.7822e-10	2.04195e-08	0.106903	1.48305
ENSMUSG00000045930	Clec14a	C-type lectin domain family 14, member a [Source:MGI Symbol;Acc:MGI:1914114]	12	24.7535	2.28668e-10	2.6015e-08	0.094843	2.47869
ENSMUSG00000007107	Atp1a4	ATPase, Na+/K+ transporting, alpha 4 polypeptide [Source:MGI Symbol;Acc:MGI:1351335]	1	182.033	2.88177e-10	3.25559e-08	0	0.563014
ENSMUSG00000041592	Sdk2	sidekick cell adhesion molecule 2 [Source:MGI Symbol;Acc:MGI:2443847]	11	2.85594	3.03777e-10	3.408e-08	5.20112	14.8521
ENSMUSG00000033965	Slc16a2	solute carrier family 16 (monocarboxylic acid transporters), member 2 [Source:MGI Symbol;Acc:MGI:1203732]	X	5.74427	3.13126e-10	3.48866e-08	2.77223	15.971
ENSMUSG00000041703	Zic5	zinc finger protein of the cerebellum 5 [Source:MGI Symbol;Acc:MGI:1929518]	14	5.93016	3.37374e-10	3.73307e-08	0.44872	2.66986
ENSMUSG00000081519	Gm13331	predicted gene 13331 [Source:MGI Symbol;Acc:MGI:3649454]	2	211.459	3.74268e-10	4.11313e-08	0	5.37279
ENSMUSG00000055653	Gpc3	glypican 3 [Source:MGI Symbol;Acc:MGI:104903]	X	5.04899	3.88705e-10	4.24293e-08	2.60654	13.1983
ENSMUSG00000027966	Col11a1	collagen, type XI, alpha 1 [Source:MGI Symbol;Acc:MGI:88446]	3	6.9709	4.12588e-10	4.47339e-08	1.04147	7.27956
ENSMUSG00000033998	Kcnk1	potassium channel, subfamily K, member 1 [Source:MGI Symbol;Acc:MGI:109322]	8	3.34063	4.40947e-10	4.749e-08	26.0656	87.1045
ENSMUSG00000052415	Tchh	trichohyalin [Source:MGI Symbol;Acc:MGI:2177944]	3	6.0729	4.48867e-10	4.80228e-08	0.739444	4.51154
ENSMUSG00000115263	Gm5089	predicted gene 5089 [Source:MGI Symbol;Acc:MGI:3644731]	14	246.242	4.62894e-10	4.91977e-08	0	2.18033
ENSMUSG00000060586	H2-Eb1	histocompatibility 2, class II antigen E beta [Source:MGI Symbol;Acc:MGI:95901]	17	6.74775	4.94152e-10	5.21766e-08	0.899439	6.15677
ENSMUSG00000055214	Pld5	phospholipase D family, member 5 [Source:MGI Symbol;Acc:MGI:2442056]	1	9.39402	5.0346e-10	5.28143e-08	0.205416	1.95879
ENSMUSG00000024299	Adamts10	a disintegrin-like and metallopeptidase (reprolysin type) with thrombospondin type 1 motif, 10 [Source:MGI Symbol;Acc:MGI:2449112]	17	2.75012	5.07125e-10	5.28555e-08	2.3362	6.42962
ENSMUSG00000050377	Il31ra	interleukin 31 receptor A [Source:MGI Symbol;Acc:MGI:2180511]	13	17.4351	5.25231e-10	5.43917e-08	0.037227	0.692593
ENSMUSG00000026147	Col9a1	collagen, type IX, alpha 1 [Source:MGI Symbol;Acc:MGI:88465]	1	5.50714	5.60206e-10	5.76441e-08	9.67994	53.3476
ENSMUSG00000079436	Kcnj13	potassium inwardly-rectifying channel, subfamily J, member 13 [Source:MGI Symbol;Acc:MGI:3781032]	1	14.74	6.46811e-10	6.61343e-08	0.742595	11.129
ENSMUSG00000034224	Slc38a8	solute carrier family 38, member 8 [Source:MGI Symbol;Acc:MGI:2685433]	8	10.5985	8.76927e-10	8.9099e-08	0.21382	2.33181
ENSMUSG00000102406	A730094K22Rik	RIKEN cDNA A730094K22 gene [Source:MGI Symbol;Acc:MGI:2442864]	9	18.1284	9.42834e-10	9.51968e-08	0.486338	8.79411
ENSMUSG00000049176	Frmpd4	FERM and PDZ domain containing 4 [Source:MGI Symbol;Acc:MGI:3042378]	X	3.87086	1.10129e-09	1.10505e-07	1.50428	5.83786
ENSMUSG00000026443	Lrrn2	leucine rich repeat protein 2, neuronal [Source:MGI Symbol;Acc:MGI:106037]	1	4.22951	1.23022e-09	1.22681e-07	1.96328	8.33622
ENSMUSG00000005107	Slc2a9	solute carrier family 2 (facilitated glucose transporter), member 9 [Source:MGI Symbol;Acc:MGI:2152844]	5	58.3091	1.67259e-09	1.65771e-07	0.00605572	0.483817
ENSMUSG00000040987	Mill2	MHC I like leukocyte 2 [Source:MGI Symbol;Acc:MGI:2179989]	7	14.6433	1.71332e-09	1.68773e-07	0.0739122	1.12229
ENSMUSG00000009246	Trpm5	transient receptor potential cation channel, subfamily M, member 5 [Source:MGI Symbol;Acc:MGI:1861718]	7	9.40022	1.76435e-09	1.72745e-07	0.0780386	0.743694
ENSMUSG00000117011	E130008D07Rik	RIKEN cDNA E130008D07 gene [Source:MGI Symbol;Acc:MGI:3584523]	17	16.8911	1.83572e-09	1.77929e-07	0.108247	1.82451
ENSMUSG00000039774	Galnt12	polypeptide N-acetylgalactosaminyltransferase 12 [Source:MGI Symbol;Acc:MGI:2444664]	4	6.50056	1.83932e-09	1.77929e-07	1.0979	7.19977
ENSMUSG00000046618	Olfml2a	olfactomedin-like 2A [Source:MGI Symbol;Acc:MGI:2444741]	2	3.3342	2.11688e-09	2.0356e-07	26.7529	89.1898
ENSMUSG00000047390	Defb9	defensin beta 9 [Source:MGI Symbol;Acc:MGI:2179198]	8	14.4594	2.24152e-09	2.14271e-07	0.79981	12.0209
ENSMUSG00000027831	Veph1	ventricular zone expressed PH domain-containing 1 [Source:MGI Symbol;Acc:MGI:1920039]	3	4.32744	2.36349e-09	2.24601e-07	0.555139	2.40783
ENSMUSG00000022763	Aifm3	apoptosis-inducing factor, mitochondrion-associated 3 [Source:MGI Symbol;Acc:MGI:1919418]	16	3.56791	2.51855e-09	2.37937e-07	1.22412	4.38355
ENSMUSG00000021792	Prxl2a	peroxiredoxin like 2A [Source:MGI Symbol;Acc:MGI:1917814]	14	2.5463	2.59074e-09	2.42083e-07	17.9256	45.6454
ENSMUSG00000047712	Ust	uronyl-2-sulfotransferase [Source:MGI Symbol;Acc:MGI:2442406]	10	6.44422	2.59241e-09	2.42083e-07	1.50304	9.72842
ENSMUSG00000116582	Gm36169	predicted gene, 36169 [Source:MGI Symbol;Acc:MGI:5595328]	16	8.34625	3.07781e-09	2.85758e-07	0.406634	3.43808
ENSMUSG00000105703	Gm43305	predicted gene 43305 [Source:MGI Symbol;Acc:MGI:5663442]	14	17.7054	3.62088e-09	3.34259e-07	0.0434794	0.804607
ENSMUSG00000043424	Eif3j2	eukaryotic translation initiation factor 3, subunit J2 [Source:MGI Symbol;Acc:MGI:3704486]	18	11.7207	3.68253e-09	3.38018e-07	0.131886	1.57846
ENSMUSG00000035112	Wnk4	WNK lysine deficient protein kinase 4 [Source:MGI Symbol;Acc:MGI:1917097]	11	6.68994	3.89908e-09	3.55873e-07	2.02029	13.5703
ENSMUSG00000029641	Rasl11a	RAS-like, family 11, member A [Source:MGI Symbol;Acc:MGI:1916145]	5	6.82818	4.06728e-09	3.6914e-07	2.00977	13.885
ENSMUSG00000073421	H2-Ab1	histocompatibility 2, class II antigen A, beta 1 [Source:MGI Symbol;Acc:MGI:103070]	17	9.63436	4.09807e-09	3.69856e-07	0.908658	8.86781
ENSMUSG00000032359	Ctsh	cathepsin H [Source:MGI Symbol;Acc:MGI:107285]	9	4.22218	4.2608e-09	3.82407e-07	1.64749	6.98968
ENSMUSG00000031837	Necab2	N-terminal EF-hand calcium binding protein 2 [Source:MGI Symbol;Acc:MGI:2152211]	8	5.57642	4.62636e-09	4.12922e-07	8.31932	46.4744
ENSMUSG00000035104	Eva1a	eva-1 homolog A (C. elegans) [Source:MGI Symbol;Acc:MGI:2385247]	6	6.79452	5.70918e-09	5.06769e-07	0.432525	2.98767
ENSMUSG00000027400	Pdyn	prodynorphin [Source:MGI Symbol;Acc:MGI:97535]	2	5.15208	6.05061e-09	5.3414e-07	4.37343	22.5993
ENSMUSG00000078954	Arhgap8	Rho GTPase activating protein 8 [Source:MGI Symbol;Acc:MGI:1920417]	15	10.0074	6.27286e-09	5.5075e-07	0.142726	1.43961
ENSMUSG00000034612	Chst11	carbohydrate sulfotransferase 11 [Source:MGI Symbol;Acc:MGI:1927166]	10	3.27666	6.45407e-09	5.60714e-07	4.80316	15.7442
ENSMUSG00000102460	Gm38197	predicted gene, 38197 [Source:MGI Symbol;Acc:MGI:5611425]	3	16.0344	6.45576e-09	5.60714e-07	0.191003	3.24341
ENSMUSG00000033361	Prrg3	proline rich Gla (G-carboxyglutamic acid) 3 (transmembrane) [Source:MGI Symbol;Acc:MGI:2685214]	X	3.40082	6.7768e-09	5.8545e-07	1.62879	5.55714
ENSMUSG00000056313	Tcim	transcriptional and immune response regulator [Source:MGI Symbol;Acc:MGI:1916318]	8	7.47559	7.96233e-09	6.8421e-07	6.50943	48.759
ENSMUSG00000029455	Aldh2	aldehyde dehydrogenase 2, mitochondrial [Source:MGI Symbol;Acc:MGI:99600]	5	2.56532	8.28557e-09	7.08219e-07	7.3959	18.9785
ENSMUSG00000017493	Igfbp4	insulin-like growth factor binding protein 4 [Source:MGI Symbol;Acc:MGI:96439]	11	6.35714	9.0996e-09	7.73706e-07	8.72996	55.544
ENSMUSG00000037762	Slc16a9	solute carrier family 16 (monocarboxylic acid transporters), member 9 [Source:MGI Symbol;Acc:MGI:1914109]	10	4.7122	9.2393e-09	7.8147e-07	0.538971	2.5596
ENSMUSG00000024867	Pip5k1b	phosphatidylinositol-4-phosphate 5-kinase, type 1 beta [Source:MGI Symbol;Acc:MGI:107930]	19	3.6391	9.49218e-09	7.98678e-07	2.42362	8.84177
ENSMUSG00000031486	Adgra2	adhesion G protein-coupled receptor A2 [Source:MGI Symbol;Acc:MGI:1925810]	8	4.41317	1.13844e-08	9.52927e-07	4.25384	18.798
ENSMUSG00000031409	Tceal6	transcription elongation factor A (SII)-like 6 [Source:MGI Symbol;Acc:MGI:1923939]	X	5.27262	1.32339e-08	1.10203e-06	5.17467	27.4421
ENSMUSG00000109732	Gm45285	predicted gene 45285 [Source:MGI Symbol;Acc:MGI:5791121]	8	7.80426	1.38545e-08	1.14779e-06	1.82867	14.4189
ENSMUSG00000117901		novel transcript, antisense to Macrod1	19	3.75351	1.4406e-08	1.18739e-06	4.28203	16.1163
ENSMUSG00000066687	Zbtb16	zinc finger and BTB domain containing 16 [Source:MGI Symbol;Acc:MGI:103222]	9	5.49654	1.56204e-08	1.28095e-06	1.70467	9.39847
ENSMUSG00000030087	Klf15	Kruppel-like factor 15 [Source:MGI Symbol;Acc:MGI:1929988]	6	3.71153	1.64868e-08	1.34517e-06	2.00985	7.47665
ENSMUSG00000021097	Clmn	calmin [Source:MGI Symbol;Acc:MGI:2136957]	12	2.39915	1.75795e-08	1.42712e-06	3.05969	7.34009
ENSMUSG00000031375	Bgn	biglycan [Source:MGI Symbol;Acc:MGI:88158]	X	5.84493	1.82909e-08	1.47744e-06	0.413273	2.44176
ENSMUSG00000110616	Gm36879	predicted gene, 36879 [Source:MGI Symbol;Acc:MGI:5596038]	8	157.018	1.92432e-08	1.54664e-06	0	0.862168
ENSMUSG00000040848	Sft2d2	SFT2 domain containing 2 [Source:MGI Symbol;Acc:MGI:1917362]	1	2.52738	1.95051e-08	1.55993e-06	6.70443	16.9375
ENSMUSG00000029311	Hsd17b11	hydroxysteroid (17-beta) dehydrogenase 11 [Source:MGI Symbol;Acc:MGI:2149821]	5	4.32622	1.97427e-08	1.57115e-06	1.98943	8.64721
ENSMUSG00000041797	Abca9	ATP-binding cassette, sub-family A (ABC1), member 9 [Source:MGI Symbol;Acc:MGI:2386796]	11	4.42229	2.48991e-08	1.97179e-06	0.600355	2.66941
ENSMUSG00000036585	Fgf1	fibroblast growth factor 1 [Source:MGI Symbol;Acc:MGI:95515]	18	2.57589	2.56624e-08	2.02232e-06	5.30619	13.6659
ENSMUSG00000052560	Cpne8	copine VIII [Source:MGI Symbol;Acc:MGI:1914121]	15	3.70997	2.79032e-08	2.18823e-06	1.89829	7.06802
ENSMUSG00000087143	A830082K12Rik	RIKEN cDNA A830082K12 gene [Source:MGI Symbol;Acc:MGI:2443527]	13	3.92457	3.38661e-08	2.64303e-06	0.471033	1.8558
ENSMUSG00000024810	Il33	interleukin 33 [Source:MGI Symbol;Acc:MGI:1924375]	19	4.52645	3.63035e-08	2.81963e-06	8.96728	40.6432
ENSMUSG00000002831	Plin4	perilipin 4 [Source:MGI Symbol;Acc:MGI:1929709]	17	7.10765	3.73236e-08	2.88499e-06	1.12217	8.01107
ENSMUSG00000070780	Rbm47	RNA binding motif protein 47 [Source:MGI Symbol;Acc:MGI:2384294]	5	3.5455	3.9705e-08	3.05445e-06	0.644792	2.29924
ENSMUSG00000031451	Gas6	growth arrest specific 6 [Source:MGI Symbol;Acc:MGI:95660]	8	2.45156	4.11875e-08	3.15348e-06	53.6098	131.447
ENSMUSG00000101939	Gm28438	predicted gene 28438 [Source:MGI Symbol;Acc:MGI:5579144]	1	-35.8056	4.24293e-08	3.23323e-06	133.064	3.64747
ENSMUSG00000018849	Wwc1	WW, C2 and coiled-coil domain containing 1 [Source:MGI Symbol;Acc:MGI:2388637]	11	3.47618	4.71848e-08	3.57874e-06	1.60709	5.61023
ENSMUSG00000028073	Pear1	platelet endothelial aggregation receptor 1 [Source:MGI Symbol;Acc:MGI:1920432]	3	5.60848	4.9908e-08	3.76759e-06	0.541183	3.06049
ENSMUSG00000020650	Bcap29	B cell receptor associated protein 29 [Source:MGI Symbol;Acc:MGI:101917]	12	3.09376	5.02677e-08	3.77709e-06	1.55148	4.80768
ENSMUSG00000043531	Sorcs1	sortilin-related VPS10 domain containing receptor 1 [Source:MGI Symbol;Acc:MGI:1929666]	19	4.18752	5.2266e-08	3.90906e-06	3.69364	15.4851
ENSMUSG00000062980	Cped1	cadherin-like and PC-esterase domain containing 1 [Source:MGI Symbol;Acc:MGI:2444814]	6	6.24811	5.56145e-08	4.14033e-06	0.283895	1.78979
ENSMUSG00000029090	Adgra3	adhesion G protein-coupled receptor A3 [Source:MGI Symbol;Acc:MGI:1917943]	5	3.21258	5.66238e-08	4.19614e-06	5.99697	19.2593
ENSMUSG00000031027	Stk33	serine/threonine kinase 33 [Source:MGI Symbol;Acc:MGI:2152419]	7	23.9668	5.76823e-08	4.23933e-06	0.0338285	0.92961
ENSMUSG00000035357	Pdzrn3	PDZ domain containing RING finger 3 [Source:MGI Symbol;Acc:MGI:1933157]	6	2.71217	5.77315e-08	4.23933e-06	3.33128	9.03464
ENSMUSG00000062209	Erbb4	erb-b2 receptor tyrosine kinase 4 [Source:MGI Symbol;Acc:MGI:104771]	1	3.6256	5.88211e-08	4.2998e-06	1.46899	5.33027
ENSMUSG00000030096	Slc6a6	solute carrier family 6 (neurotransmitter transporter, taurine), member 6 [Source:MGI Symbol;Acc:MGI:98488]	6	3.31819	6.5608e-08	4.77431e-06	118.656	393.735
ENSMUSG00000023341	Mx2	MX dynamin-like GTPase 2 [Source:MGI Symbol;Acc:MGI:97244]	16	4.36394	6.90985e-08	5.00577e-06	1.64495	7.20445
ENSMUSG00000034324	Tmem132c	transmembrane protein 132C [Source:MGI Symbol;Acc:MGI:2443061]	5	5.40936	6.97802e-08	5.03259e-06	1.11008	6.03359
ENSMUSG00000027508	Pag1	phosphoprotein associated with glycosphingolipid microdomains 1 [Source:MGI Symbol;Acc:MGI:2443160]	3	2.8837	7.50165e-08	5.38619e-06	1.66337	4.80517
ENSMUSG00000024232	Bambi	BMP and activin membrane-bound inhibitor [Source:MGI Symbol;Acc:MGI:1915260]	18	3.74207	7.80235e-08	5.5773e-06	1.84478	6.89051
ENSMUSG00000031785	Adgrg1	adhesion G protein-coupled receptor G1 [Source:MGI Symbol;Acc:MGI:1340051]	8	3.91257	8.1313e-08	5.78683e-06	1.67451	6.57156
ENSMUSG00000063297	Luzp2	leucine zipper protein 2 [Source:MGI Symbol;Acc:MGI:1889615]	7	3.64518	8.22097e-08	5.82499e-06	1.55381	5.68053
ENSMUSG00000004347	Pde1c	phosphodiesterase 1C [Source:MGI Symbol;Acc:MGI:108413]	6	2.83891	8.26548e-08	5.83095e-06	3.10898	8.82906
ENSMUSG00000030088	Aldh1l1	aldehyde dehydrogenase 1 family, member L1 [Source:MGI Symbol;Acc:MGI:1340024]	6	2.84046	8.6016e-08	6.04169e-06	2.7014	7.6848
ENSMUSG00000028434	Epb41l4b	erythrocyte membrane protein band 4.1 like 4b [Source:MGI Symbol;Acc:MGI:1859149]	4	2.62684	8.80262e-08	6.15612e-06	1.7718	4.65509
ENSMUSG00000022311	Csmd3	CUB and Sushi multiple domains 3 [Source:MGI Symbol;Acc:MGI:2386403]	15	3.47817	9.03406e-08	6.29074e-06	0.690044	2.40571
ENSMUSG00000042988	Notum	notum palmitoleoyl-protein carboxylesterase [Source:MGI Symbol;Acc:MGI:1924833]	11	3.9633	9.91197e-08	6.87244e-06	2.03375	8.08376
ENSMUSG00000104286	Gm37457	predicted gene, 37457 [Source:MGI Symbol;Acc:MGI:5610685]	9	60.5785	1.04475e-07	7.21278e-06	0.0126516	1.04853
ENSMUSG00000028373	Astn2	astrotactin 2 [Source:MGI Symbol;Acc:MGI:1889277]	4	4.16932	1.068e-07	7.34195e-06	3.01714	12.6105
ENSMUSG00000035356	Nfkbiz	nuclear factor of kappa light polypeptide gene enhancer in B cells inhibitor, zeta [Source:MGI Symbol;Acc:MGI:1931595]	16	2.83187	1.1012e-07	7.53806e-06	31.7538	89.9344
ENSMUSG00000015134	Aldh1a3	aldehyde dehydrogenase family 1, subfamily A3 [Source:MGI Symbol;Acc:MGI:1861722]	7	4.88007	1.17034e-07	7.97758e-06	0.641108	3.14944
ENSMUSG00000028980	H6pd	hexose-6-phosphate dehydrogenase (glucose 1-dehydrogenase) [Source:MGI Symbol;Acc:MGI:2140356]	4	2.88318	1.1921e-07	8.09177e-06	7.50787	21.6534
ENSMUSG00000041842	Fhdc1	FH2 domain containing 1 [Source:MGI Symbol;Acc:MGI:2684972]	3	7.31241	1.24111e-07	8.38916e-06	0.994923	7.30419
ENSMUSG00000056418	BC043934	cDNA sequence BC043934 [Source:MGI Symbol;Acc:MGI:2679715]	9	8.05311	1.25344e-07	8.43722e-06	0.789713	6.43588
ENSMUSG00000046768	Rhoj	ras homolog family member J [Source:MGI Symbol;Acc:MGI:1931551]	12	5.97558	1.29821e-07	8.70233e-06	4.65465	27.8451
ENSMUSG00000046805	Mpeg1	macrophage expressed gene 1 [Source:MGI Symbol;Acc:MGI:1333743]	19	5.18913	1.33034e-07	8.88087e-06	0.430459	2.26403
ENSMUSG00000116660	9030404E10Rik	RIKEN cDNA 9030404E10 gene [Source:MGI Symbol;Acc:MGI:1918778]	16	18.0352	1.50746e-07	1.00218e-05	0.095481	1.98077
ENSMUSG00000052117	D630039A03Rik	RIKEN cDNA D630039A03 gene [Source:MGI Symbol;Acc:MGI:2442889]	4	9.53789	1.51964e-07	1.00614e-05	0.300012	2.91241
ENSMUSG00000051951	Xkr4	X-linked Kx blood group related 4 [Source:MGI Symbol;Acc:MGI:3528744]	1	3.0671	1.53342e-07	1.00768e-05	2.70403	8.3089
ENSMUSG00000021638	Ocln	occludin [Source:MGI Symbol;Acc:MGI:106183]	13	4.18675	1.53444e-07	1.00768e-05	0.810618	3.40649
ENSMUSG00000039497	Dse	dermatan sulfate epimerase [Source:MGI Symbol;Acc:MGI:2443455]	10	2.82044	1.64278e-07	1.07446e-05	2.30866	6.50452
ENSMUSG00000001663	Gstt1	glutathione S-transferase, theta 1 [Source:MGI Symbol;Acc:MGI:107379]	10	3.32246	1.82241e-07	1.18714e-05	2.93469	9.75563
ENSMUSG00000016206	H2-M3	histocompatibility 2, M region locus 3 [Source:MGI Symbol;Acc:MGI:95915]	17	5.67544	1.93937e-07	1.25202e-05	0.813983	4.71213
ENSMUSG00000063531	Sema3e	sema domain, immunoglobulin domain (Ig), short basic domain, secreted, (semaphorin) 3E [Source:MGI Symbol;Acc:MGI:1340034]	5	3.02097	1.93997e-07	1.25202e-05	1.84447	5.5783
ENSMUSG00000068566	Myadm	myeloid-associated differentiation marker [Source:MGI Symbol;Acc:MGI:1355332]	7	3.11571	1.94526e-07	1.25202e-05	1.31632	4.10926
ENSMUSG00000040606	Kazn	kazrin, periplakin interacting protein [Source:MGI Symbol;Acc:MGI:1918779]	4	2.67584	1.97098e-07	1.26354e-05	3.66137	9.79781
ENSMUSG00000042451	Mybph	myosin binding protein H [Source:MGI Symbol;Acc:MGI:1858196]	1	11.2353	2.23569e-07	1.42757e-05	0.412979	4.68516
ENSMUSG00000026712	Mrc1	mannose receptor, C type 1 [Source:MGI Symbol;Acc:MGI:97142]	2	6.18198	2.28981e-07	1.45637e-05	0.34974	2.18455
ENSMUSG00000036641	Ccdc148	coiled-coil domain containing 148 [Source:MGI Symbol;Acc:MGI:3039583]	2	4.30088	2.30961e-07	1.46321e-05	0.83315	3.59872
ENSMUSG00000019960	Dusp6	dual specificity phosphatase 6 [Source:MGI Symbol;Acc:MGI:1914853]	10	2.45766	3.52609e-07	2.22515e-05	10.1818	25.0139
ENSMUSG00000063851	Rnf183	ring finger protein 183 [Source:MGI Symbol;Acc:MGI:1923322]	4	-21.2765	4.00455e-07	2.51726e-05	1.38626	0.0542943
ENSMUSG00000020363	Gfpt2	glutamine fructose-6-phosphate transaminase 2 [Source:MGI Symbol;Acc:MGI:1338883]	11	5.64675	4.11845e-07	2.57882e-05	1.65575	9.37904
ENSMUSG00000030559	Rab38	RAB38, member RAS oncogene family [Source:MGI Symbol;Acc:MGI:1919683]	7	3.84835	4.4852e-07	2.79762e-05	1.95931	7.55477
ENSMUSG00000074743	Thbd	thrombomodulin [Source:MGI Symbol;Acc:MGI:98736]	2	5.09064	4.50736e-07	2.80063e-05	1.64147	8.37122
ENSMUSG00000004730	Adgre1	adhesion G protein-coupled receptor E1 [Source:MGI Symbol;Acc:MGI:106912]	17	15.0265	4.56147e-07	2.82339e-05	0.0591428	0.917842
ENSMUSG00000062866	Phactr2	phosphatase and actin regulator 2 [Source:MGI Symbol;Acc:MGI:2446138]	10	2.37516	5.20327e-07	3.20835e-05	5.77179	13.7138
ENSMUSG00000037552	Plekhg2	pleckstrin homology domain containing, family G (with RhoGef domain) member 2 [Source:MGI Symbol;Acc:MGI:2141874]	7	2.72431	5.55592e-07	3.41277e-05	7.42977	20.2507
ENSMUSG00000008999	Bmp7	bone morphogenetic protein 7 [Source:MGI Symbol;Acc:MGI:103302]	2	2.62295	5.77812e-07	3.53581e-05	16.751	43.9293
ENSMUSG00000025911	Adhfe1	alcohol dehydrogenase, iron containing, 1 [Source:MGI Symbol;Acc:MGI:1923437]	1	3.21643	5.80848e-07	3.54098e-05	1.16211	3.7468
ENSMUSG00000036109	Mbnl3	muscleblind like splicing factor 3 [Source:MGI Symbol;Acc:MGI:2444912]	X	10.838	5.88579e-07	3.57462e-05	0.0564154	0.607113
ENSMUSG00000035472	Slc25a21	solute carrier family 25 (mitochondrial oxodicarboxylate carrier), member 21 [Source:MGI Symbol;Acc:MGI:2445059]	12	5.07888	6.31128e-07	3.81868e-05	0.263756	1.35219
ENSMUSG00000024781	Lipa	lysosomal acid lipase A [Source:MGI Symbol;Acc:MGI:96789]	19	2.45571	6.7098e-07	4.04466e-05	2.4751	6.08286
ENSMUSG00000069171	Nr2f1	nuclear receptor subfamily 2, group F, member 1 [Source:MGI Symbol;Acc:MGI:1352451]	13	4.05911	7.33655e-07	4.40602e-05	2.09165	8.5195
ENSMUSG00000007891	Ctsd	cathepsin D [Source:MGI Symbol;Acc:MGI:88562]	7	2.20341	7.68756e-07	4.59972e-05	31.8369	70.1596
ENSMUSG00000023921	Mmut	methylmalonyl-Coenzyme A mutase [Source:MGI Symbol;Acc:MGI:97239]	17	2.42562	7.74828e-07	4.61895e-05	4.02207	9.75231
ENSMUSG00000057751	Megf6	multiple EGF-like-domains 6 [Source:MGI Symbol;Acc:MGI:1919351]	4	3.45189	8.18229e-07	4.85974e-05	1.27101	4.39179
ENSMUSG00000036545	Adamts2	a disintegrin-like and metallopeptidase (reprolysin type) with thrombospondin type 1 motif, 2 [Source:MGI Symbol;Acc:MGI:1347356]	11	5.30868	8.50192e-07	5.03108e-05	0.245261	1.31765
ENSMUSG00000084989	Crocc2	ciliary rootlet coiled-coil, rootletin family member 2 [Source:MGI Symbol;Acc:MGI:3045962]	1	6.40818	8.96159e-07	5.28374e-05	0.352096	2.27586
ENSMUSG00000015224	Cyp2j9	cytochrome P450, family 2, subfamily j, polypeptide 9 [Source:MGI Symbol;Acc:MGI:1921769]	4	5.65217	9.05028e-07	5.31663e-05	0.272103	1.56691
ENSMUSG00000030209	Grin2b	glutamate receptor, ionotropic, NMDA2B (epsilon 2) [Source:MGI Symbol;Acc:MGI:95821]	6	3.1222	9.58771e-07	5.61194e-05	1.29634	4.05193
ENSMUSG00000024972	Lgals12	lectin, galactose binding, soluble 12 [Source:MGI Symbol;Acc:MGI:1929094]	19	9.08047	9.66462e-07	5.63653e-05	0.172051	1.62038
ENSMUSG00000107881	Gm44250	predicted gene, 44250 [Source:MGI Symbol;Acc:MGI:5690642]	6	3.32062	9.96706e-07	5.79133e-05	1.47192	4.88195
ENSMUSG00000023972	Ptk7	PTK7 protein tyrosine kinase 7 [Source:MGI Symbol;Acc:MGI:1918711]	17	2.566	1.00017e-06	5.79133e-05	3.36828	8.64825
ENSMUSG00000024164	C3	complement component 3 [Source:MGI Symbol;Acc:MGI:88227]	17	5.01897	1.013e-06	5.84466e-05	0.937654	4.73485
ENSMUSG00000045636	Mtus1	mitochondrial tumor suppressor 1 [Source:MGI Symbol;Acc:MGI:2142572]	8	2.86198	1.06509e-06	6.11642e-05	5.17473	14.8165
ENSMUSG00000024621	Csf1r	colony stimulating factor 1 receptor [Source:MGI Symbol;Acc:MGI:1339758]	18	3.17043	1.06768e-06	6.11642e-05	0.975663	3.10696
ENSMUSG00000027459	Fam110a	family with sequence similarity 110, member A [Source:MGI Symbol;Acc:MGI:1921097]	2	-3.1835	1.09387e-06	6.24432e-05	16.3111	5.11894
ENSMUSG00000040253	Gbp7	guanylate binding protein 7 [Source:MGI Symbol;Acc:MGI:2444421]	3	4.01008	1.10233e-06	6.27049e-05	0.707583	2.85919
ENSMUSG00000042251	Pm20d1	peptidase M20 domain containing 1 [Source:MGI Symbol;Acc:MGI:2442939]	1	4.11363	1.22136e-06	6.9232e-05	0.306323	1.26733
ENSMUSG00000022483	Col2a1	collagen, type II, alpha 1 [Source:MGI Symbol;Acc:MGI:88452]	15	4.59767	1.2896e-06	7.28446e-05	7.08589	32.5953
ENSMUSG00000015090	Ptgds	prostaglandin D2 synthase (brain) [Source:MGI Symbol;Acc:MGI:99261]	2	2.37043	1.29696e-06	7.30049e-05	242.802	575.57
ENSMUSG00000020836	Coro6	coronin 6 [Source:MGI Symbol;Acc:MGI:2183448]	11	4.35631	1.41713e-06	7.94921e-05	0.600574	2.64865
ENSMUSG00000026824	Kcnj3	potassium inwardly-rectifying channel, subfamily J, member 3 [Source:MGI Symbol;Acc:MGI:104742]	2	3.55891	1.43381e-06	8.01494e-05	0.90075	3.22484
ENSMUSG00000027339	Rassf2	Ras association (RalGDS/AF-6) domain family member 2 [Source:MGI Symbol;Acc:MGI:2442060]	2	4.14352	1.47256e-06	8.20316e-05	0.18771	0.784708
ENSMUSG00000044317	Gpr4	G protein-coupled receptor 4 [Source:MGI Symbol;Acc:MGI:2441992]	7	23.4631	1.49668e-06	8.30891e-05	0.0614153	1.57013
ENSMUSG00000034903	Cobll1	Cobl-like 1 [Source:MGI Symbol;Acc:MGI:2442894]	2	3.83493	1.51802e-06	8.39848e-05	1.10064	4.23115
ENSMUSG00000029810	Tmem176b	transmembrane protein 176B [Source:MGI Symbol;Acc:MGI:1916348]	6	2.35693	1.53744e-06	8.47688e-05	23.5356	55.4558
ENSMUSG00000026249	Serpine2	serine (or cysteine) peptidase inhibitor, clade E, member 2 [Source:MGI Symbol;Acc:MGI:101780]	1	3.98082	1.61128e-06	8.83085e-05	0.473984	1.90108
ENSMUSG00000111649	Gm48945	predicted gene, 48945 [Source:MGI Symbol;Acc:MGI:6118267]	9	13.2951	1.61257e-06	8.83085e-05	0.0603349	0.864827
ENSMUSG00000058571	Gpc6	glypican 6 [Source:MGI Symbol;Acc:MGI:1346322]	14	2.78128	1.63106e-06	8.90194e-05	3.84862	10.7184
ENSMUSG00000019838	Slc16a10	solute carrier family 16 (monocarboxylic acid transporters), member 10 [Source:MGI Symbol;Acc:MGI:1919722]	10	4.1467	1.65649e-06	8.99121e-05	0.267899	1.11686
ENSMUSG00000006154	Eps8l1	EPS8-like 1 [Source:MGI Symbol;Acc:MGI:1914675]	7	-6.00142	1.65855e-06	8.99121e-05	1.63817	0.270977
ENSMUSG00000048402	Gli2	GLI-Kruppel family member GLI2 [Source:MGI Symbol;Acc:MGI:95728]	1	2.63503	1.71244e-06	9.2523e-05	2.76992	7.29324
ENSMUSG00000030022	Adamts9	a disintegrin-like and metallopeptidase (reprolysin type) with thrombospondin type 1 motif, 9 [Source:MGI Symbol;Acc:MGI:1916320]	6	5.60982	1.74046e-06	9.37236e-05	0.432573	2.4384
ENSMUSG00000055235	Wdr86	WD repeat domain 86 [Source:MGI Symbol;Acc:MGI:1915466]	5	19.9826	1.78036e-06	9.55541e-05	0.0173258	0.405289
ENSMUSG00000043913	Ccdc60	coiled-coil domain containing 60 [Source:MGI Symbol;Acc:MGI:2141043]	5	5.16885	1.96893e-06	0.000105003	0.3036	1.5878
ENSMUSG00000029468	P2rx7	purinergic receptor P2X, ligand-gated ion channel, 7 [Source:MGI Symbol;Acc:MGI:1339957]	5	15.1646	1.96941e-06	0.000105003	0.0156096	0.263022
ENSMUSG00000020388	Pdlim4	PDZ and LIM domain 4 [Source:MGI Symbol;Acc:MGI:1353470]	11	2.76123	2.01745e-06	0.00010721	6.81394	18.8262
ENSMUSG00000031344	Gabrq	gamma-aminobutyric acid (GABA) A receptor, subunit theta [Source:MGI Symbol;Acc:MGI:1888498]	X	17.1213	2.08032e-06	0.000110189	0.102567	1.79889
ENSMUSG00000026211	Obsl1	obscurin-like 1 [Source:MGI Symbol;Acc:MGI:2138628]	1	2.3773	2.09436e-06	0.00011057	1.22262	2.90908
ENSMUSG00000039518	Cdsn	corneodesmosin [Source:MGI Symbol;Acc:MGI:3505689]	17	-4.20713	2.13162e-06	0.000112171	3.16407	0.752341
ENSMUSG00000027239	Mdk	midkine [Source:MGI Symbol;Acc:MGI:96949]	2	2.60415	2.20868e-06	0.000115848	6.13792	16.0357
ENSMUSG00000025492	Ifitm3	interferon induced transmembrane protein 3 [Source:MGI Symbol;Acc:MGI:1913391]	7	3.23256	2.23219e-06	0.000116702	13.5782	43.8911
ENSMUSG00000113776	Gm19327	predicted gene, 19327 [Source:MGI Symbol;Acc:MGI:5011512]	12	3.08595	2.38617e-06	0.00012435	1.56772	4.83978
ENSMUSG00000025969	Nrp2	neuropilin 2 [Source:MGI Symbol;Acc:MGI:1100492]	1	2.6616	2.49639e-06	0.000129676	1.72058	4.58487
ENSMUSG00000020218	Wif1	Wnt inhibitory factor 1 [Source:MGI Symbol;Acc:MGI:1344332]	10	7.08814	2.50769e-06	0.000129845	0.209969	1.54216
ENSMUSG00000042751	Nmnat2	nicotinamide nucleotide adenylyltransferase 2 [Source:MGI Symbol;Acc:MGI:2444155]	1	3.23364	2.66557e-06	0.000137579	2.96772	9.60953
ENSMUSG00000026463	Atp2b4	ATPase, Ca++ transporting, plasma membrane 4 [Source:MGI Symbol;Acc:MGI:88111]	1	2.61969	2.8087e-06	0.000144505	2.33294	6.11853
ENSMUSG00000036896	C1qc	complement component 1, q subcomponent, C chain [Source:MGI Symbol;Acc:MGI:88225]	4	4.40444	2.82532e-06	0.000144899	0.972773	4.32857
ENSMUSG00000029193	Cckar	cholecystokinin A receptor [Source:MGI Symbol;Acc:MGI:99478]	5	16.7732	2.87759e-06	0.000147112	0.0250798	0.470615
ENSMUSG00000031558	Slit2	slit guidance ligand 2 [Source:MGI Symbol;Acc:MGI:1315205]	5	2.71241	3.01615e-06	0.00015371	3.04222	8.25478
ENSMUSG00000024940	Ltbp3	latent transforming growth factor beta binding protein 3 [Source:MGI Symbol;Acc:MGI:1101355]	19	2.20879	3.10401e-06	0.000157689	23.8969	52.781
ENSMUSG00000030075	Cntn3	contactin 3 [Source:MGI Symbol;Acc:MGI:99534]	6	5.24251	3.19783e-06	0.000161947	0.269336	1.42658
ENSMUSG00000069441	Dsg1a	desmoglein 1 alpha [Source:MGI Symbol;Acc:MGI:94930]	18	4.22439	3.24992e-06	0.00016407	0.416033	1.75176
ENSMUSG00000032198	Dock6	dedicator of cytokinesis 6 [Source:MGI Symbol;Acc:MGI:1914789]	9	2.21477	3.28202e-06	0.000165175	4.05013	8.97098
ENSMUSG00000022425	Enpp2	ectonucleotide pyrophosphatase/phosphodiesterase 2 [Source:MGI Symbol;Acc:MGI:1321390]	15	3.35483	3.49635e-06	0.000175415	5.15305	17.3077
ENSMUSG00000023224	Serping1	serine (or cysteine) peptidase inhibitor, clade G, member 1 [Source:MGI Symbol;Acc:MGI:894696]	2	2.42172	3.57379e-06	0.000178745	19.2045	46.5006
ENSMUSG00000062822	4833420G17Rik	RIKEN cDNA 4833420G17 gene [Source:MGI Symbol;Acc:MGI:1914642]	13	-2.40547	3.65747e-06	0.000182366	5.32521	2.21408
ENSMUSG00000029380	Cxcl1	chemokine (C-X-C motif) ligand 1 [Source:MGI Symbol;Acc:MGI:108068]	5	5.21141	3.67593e-06	0.000182661	15.5925	81.3009
ENSMUSG00000029561	Oasl2	2'-5' oligoadenylate synthetase-like 2 [Source:MGI Symbol;Acc:MGI:1344390]	5	3.25992	3.68601e-06	0.000182661	0.540148	1.76071
ENSMUSG00000042010	Acacb	acetyl-Coenzyme A carboxylase beta [Source:MGI Symbol;Acc:MGI:2140940]	5	3.31245	3.72081e-06	0.000183822	0.494066	1.64166
ENSMUSG00000034648	Lrrn1	leucine rich repeat protein 1, neuronal [Source:MGI Symbol;Acc:MGI:106038]	6	3.79415	3.77974e-06	0.000186164	1.95359	7.43999
ENSMUSG00000037904	Ankrd9	ankyrin repeat domain 9 [Source:MGI Symbol;Acc:MGI:1921501]	12	3.8868	3.8504e-06	0.000189068	2.33492	9.08945
ENSMUSG00000017756	Slc12a7	solute carrier family 12, member 7 [Source:MGI Symbol;Acc:MGI:1342283]	13	2.39327	4.00598e-06	0.000196111	1.81377	4.34612
ENSMUSG00000085423	4930594M22Rik	RIKEN cDNA 4930594M22 gene [Source:MGI Symbol;Acc:MGI:1925478]	14	11.5927	4.03782e-06	0.000196783	0.613764	7.26217
ENSMUSG00000049107	Ntf3	neurotrophin 3 [Source:MGI Symbol;Acc:MGI:97380]	6	6.48808	4.04407e-06	0.000196783	0.292288	1.91934
ENSMUSG00000029563	Foxp2	forkhead box P2 [Source:MGI Symbol;Acc:MGI:2148705]	6	4.13455	4.09353e-06	0.000198592	0.306787	1.27607
ENSMUSG00000022894	Adamts5	a disintegrin-like and metallopeptidase (reprolysin type) with thrombospondin type 1 motif, 5 (aggrecanase-2) [Source:MGI Symbol;Acc:MGI:1346321]	16	2.14242	4.28067e-06	0.000207049	3.72153	7.9706
ENSMUSG00000021763	Cspg4b	chondroitin sulfate proteoglycan 4B [Source:MGI Symbol;Acc:MGI:3040697]	13	2.36404	4.31338e-06	0.000208008	3.55227	8.39143
ENSMUSG00000027544	Nfatc2	nuclear factor of activated T cells, cytoplasmic, calcineurin dependent 2 [Source:MGI Symbol;Acc:MGI:102463]	2	3.4836	4.53102e-06	0.000217853	3.66702	12.7764
ENSMUSG00000093846	Gm4425	predicted gene 4425 [Source:MGI Symbol;Acc:MGI:3809660]	12	21.7026	4.84147e-06	0.000232089	0.047868	1.05201
ENSMUSG00000066191	Anks6	ankyrin repeat and sterile alpha motif domain containing 6 [Source:MGI Symbol;Acc:MGI:1922941]	4	2.61733	4.94502e-06	0.000236351	1.69575	4.442
ENSMUSG00000033685	Ucp2	uncoupling protein 2 (mitochondrial, proton carrier) [Source:MGI Symbol;Acc:MGI:109354]	7	3.74552	5.03471e-06	0.000239928	3.15333	11.8291
ENSMUSG00000029603	Dtx1	deltex 1, E3 ubiquitin ligase [Source:MGI Symbol;Acc:MGI:1352744]	5	2.1606	5.13603e-06	0.000244037	5.33184	11.5277
ENSMUSG00000049580	Tsku	tsukushi, small leucine rich proteoglycan [Source:MGI Symbol;Acc:MGI:2443855]	7	3.6928	5.17545e-06	0.000245189	2.90611	10.7582
ENSMUSG00000101517	4732465J04Rik	RIKEN cDNA 4732465J04 gene [Source:MGI Symbol;Acc:MGI:3041208]	10	17.5267	5.30148e-06	0.000250425	0.0543797	1.02766
ENSMUSG00000019647	Sema6a	sema domain, transmembrane domain (TM), and cytoplasmic domain, (semaphorin) 6A [Source:MGI Symbol;Acc:MGI:1203727]	18	2.70948	5.49028e-06	0.000258587	4.10368	11.1282
ENSMUSG00000021091	Serpina3n	serine (or cysteine) peptidase inhibitor, clade A, member 3N [Source:MGI Symbol;Acc:MGI:105045]	12	3.741	5.53649e-06	0.000259876	27.4913	102.846
ENSMUSG00000023336	Wfdc1	WAP four-disulfide core domain 1 [Source:MGI Symbol;Acc:MGI:1915116]	8	6.24207	5.54981e-06	0.000259876	5.91697	37.0399
ENSMUSG00000039109	F13a1	coagulation factor XIII, A1 subunit [Source:MGI Symbol;Acc:MGI:1921395]	13	6.49018	5.59197e-06	0.000260778	0.176439	1.16689
ENSMUSG00000029373	Pf4	platelet factor 4 [Source:MGI Symbol;Acc:MGI:1888711]	5	5.15596	5.60137e-06	0.000260778	1.2593	6.51881
ENSMUSG00000019762	Iyd	iodotyrosine deiodinase [Source:MGI Symbol;Acc:MGI:1917587]	10	2.82505	5.7443e-06	0.000266664	3.4966	9.86002
ENSMUSG00000028517	Plpp3	phospholipid phosphatase 3 [Source:MGI Symbol;Acc:MGI:1915166]	4	3.31197	5.93994e-06	0.000274956	9.81804	32.5457
ENSMUSG00000032911	Cspg4	chondroitin sulfate proteoglycan 4 [Source:MGI Symbol;Acc:MGI:2153093]	9	4.30632	5.96175e-06	0.000275177	0.0928712	0.403987
ENSMUSG00000021998	Lcp1	lymphocyte cytosolic protein 1 [Source:MGI Symbol;Acc:MGI:104808]	14	5.37168	6.10463e-06	0.00028097	0.120096	0.649525
ENSMUSG00000030103	Bhlhe40	basic helix-loop-helix family, member e40 [Source:MGI Symbol;Acc:MGI:1097714]	6	2.47728	6.28554e-06	0.000288474	61.9989	153.602
ENSMUSG00000071637	Cebpd	CCAAT/enhancer binding protein (C/EBP), delta [Source:MGI Symbol;Acc:MGI:103573]	16	2.50731	6.38911e-06	0.000292397	62.541	156.822
ENSMUSG00000038233	Gask1a	golgi associated kinase 1A [Source:MGI Symbol;Acc:MGI:3041196]	9	4.83059	6.43222e-06	0.000293538	0.394701	1.93483
ENSMUSG00000050822	Slc29a4	solute carrier family 29 (nucleoside transporters), member 4 [Source:MGI Symbol;Acc:MGI:2385330]	5	-7.86138	6.48652e-06	0.000295183	6.88857	0.874131
ENSMUSG00000085828	Gm15612	predicted gene 15612 [Source:MGI Symbol;Acc:MGI:3641714]	6	3.68744	6.63613e-06	0.000301142	2.10658	7.80725
ENSMUSG00000067242	Lgi1	leucine-rich repeat LGI family, member 1 [Source:MGI Symbol;Acc:MGI:1861691]	19	4.02043	6.72542e-06	0.000304339	0.185846	0.750944
ENSMUSG00000031626	Sorbs2	sorbin and SH3 domain containing 2 [Source:MGI Symbol;Acc:MGI:1924574]	8	2.11537	6.79475e-06	0.000306618	1.64461	3.47968
ENSMUSG00000055639	Dach1	dachshund family transcription factor 1 [Source:MGI Symbol;Acc:MGI:1277991]	14	3.08208	6.91172e-06	0.000311027	3.25854	10.0571
ENSMUSG00000085787	Gm13092	predicted gene 13092 [Source:MGI Symbol;Acc:MGI:3649661]	4	9.72377	7.10822e-06	0.000318981	2.12126	21.5143
ENSMUSG00000056162	Cndp1	carnosine dipeptidase 1 (metallopeptidase M20 family) [Source:MGI Symbol;Acc:MGI:2451097]	18	11.8164	7.1508e-06	0.000320003	0.0559503	0.691881
ENSMUSG00000017453	Pipox	pipecolic acid oxidase [Source:MGI Symbol;Acc:MGI:1197006]	11	6.15208	7.29671e-06	0.000325631	0.42509	2.66378
ENSMUSG00000008540	Mgst1	microsomal glutathione S-transferase 1 [Source:MGI Symbol;Acc:MGI:1913850]	6	2.56073	7.64953e-06	0.000340436	7.43443	19.0258
ENSMUSG00000022512	Cldn1	claudin 1 [Source:MGI Symbol;Acc:MGI:1276109]	16	5.81736	7.68169e-06	0.000340928	1.68359	9.83213
ENSMUSG00000051506	Wdfy4	WD repeat and FYVE domain containing 4 [Source:MGI Symbol;Acc:MGI:3584510]	14	9.41309	7.93344e-06	0.000351136	0.0363824	0.359872
ENSMUSG00000039252	Lgi2	leucine-rich repeat LGI family, member 2 [Source:MGI Symbol;Acc:MGI:2180196]	5	2.20753	8.1674e-06	0.000360504	2.41803	5.33581
ENSMUSG00000078350	Smim1	small integral membrane protein 1 [Source:MGI Symbol;Acc:MGI:1916109]	4	2.90096	8.20177e-06	0.000361034	1.27627	3.70181
ENSMUSG00000022949	Clic6	chloride intracellular channel 6 [Source:MGI Symbol;Acc:MGI:2146607]	16	3.74077	8.41829e-06	0.000369558	1.47935	5.55951
ENSMUSG00000059921	Unc5c	unc-5 netrin receptor C [Source:MGI Symbol;Acc:MGI:1095412]	3	2.89112	8.82087e-06	0.000385586	1.5278	4.42245
ENSMUSG00000015970	Chdh	choline dehydrogenase [Source:MGI Symbol;Acc:MGI:1860776]	14	2.83217	8.83413e-06	0.000385586	1.99151	5.63651
ENSMUSG00000021219	Rgs6	regulator of G-protein signaling 6 [Source:MGI Symbol;Acc:MGI:1354730]	12	2.76864	8.855e-06	0.000385586	2.54373	7.05104
ENSMUSG00000001773	Folh1	folate hydrolase 1 [Source:MGI Symbol;Acc:MGI:1858193]	7	3.24761	9.03933e-06	0.000392555	2.16944	7.06905
ENSMUSG00000029245	Epha5	Eph receptor A5 [Source:MGI Symbol;Acc:MGI:99654]	5	2.10641	9.65801e-06	0.000418298	1.67038	3.51797
ENSMUSG00000017607	Tns4	tensin 4 [Source:MGI Symbol;Acc:MGI:2144377]	11	10.6411	9.84417e-06	0.000425221	0.102757	1.11023
ENSMUSG00000037035	Inhbb	inhibin beta-B [Source:MGI Symbol;Acc:MGI:96571]	1	3.16147	1.02075e-05	0.000439739	2.93474	9.28557
ENSMUSG00000103377	Gm37180	predicted gene, 37180 [Source:MGI Symbol;Acc:MGI:5610408]	1	5.91156	1.09421e-05	0.000470131	0.319685	1.92579
ENSMUSG00000055333	Fat2	FAT atypical cadherin 2 [Source:MGI Symbol;Acc:MGI:2685369]	11	5.36294	1.18187e-05	0.000506447	0.0606746	0.330389
ENSMUSG00000043088	Il17re	interleukin 17 receptor E [Source:MGI Symbol;Acc:MGI:1889371]	6	3.96927	1.19575e-05	0.00051104	0.530942	2.11359
ENSMUSG00000015968	Cacna1d	calcium channel, voltage-dependent, L type, alpha 1D subunit [Source:MGI Symbol;Acc:MGI:88293]	14	2.31944	1.20921e-05	0.000515431	3.95433	9.17544
ENSMUSG00000060802	B2m	beta-2 microglobulin [Source:MGI Symbol;Acc:MGI:88127]	2	2.67509	1.21827e-05	0.000517924	11.4688	30.7769
ENSMUSG00000085001	Rapgef4os2	Rap guanine nucleotide exchange factor (GEF) 4, opposite strand 2 [Source:MGI Symbol;Acc:MGI:2139429]	2	16.5464	1.22633e-05	0.000519982	0.0307046	0.571389
ENSMUSG00000018899	Irf1	interferon regulatory factor 1 [Source:MGI Symbol;Acc:MGI:96590]	11	3.44096	1.25145e-05	0.000529244	17.8209	61.3288
ENSMUSG00000073424	Cyp4f15	cytochrome P450, family 4, subfamily f, polypeptide 15 [Source:MGI Symbol;Acc:MGI:2146921]	17	7.38574	1.26717e-05	0.000534493	0.4871	3.6783
ENSMUSG00000028273	Pdlim5	PDZ and LIM domain 5 [Source:MGI Symbol;Acc:MGI:1927489]	3	2.14179	1.27262e-05	0.00053534	5.12024	10.9664
ENSMUSG00000032092	Mpzl2	myelin protein zero-like 2 [Source:MGI Symbol;Acc:MGI:1289160]	9	7.12558	1.2758e-05	0.00053534	0.492268	3.52339
ENSMUSG00000034595	Ppp1r18	protein phosphatase 1, regulatory subunit 18 [Source:MGI Symbol;Acc:MGI:1923698]	17	2.14468	1.30395e-05	0.000545732	8.13027	17.4455
ENSMUSG00000022150	Dab2	disabled 2, mitogen-responsive phosphoprotein [Source:MGI Symbol;Acc:MGI:109175]	15	3.22015	1.33492e-05	0.000557253	0.535452	1.73679
ENSMUSG00000032006	Pdgfd	platelet-derived growth factor, D polypeptide [Source:MGI Symbol;Acc:MGI:1919035]	9	3.18191	1.35545e-05	0.000564363	2.04526	6.51965
ENSMUSG00000109209	Gm45104	predicted gene 45104 [Source:MGI Symbol;Acc:MGI:5753680]	7	6.70887	1.39798e-05	0.000580574	0.119305	0.819634
ENSMUSG00000033306	Lpp	LIM domain containing preferred translocation partner in lipoma [Source:MGI Symbol;Acc:MGI:2441849]	16	1.95897	1.40227e-05	0.000580862	2.52246	4.94067
ENSMUSG00000004665	Cnn2	calponin 2 [Source:MGI Symbol;Acc:MGI:105093]	10	3.61168	1.41813e-05	0.000585929	1.79205	6.51745
ENSMUSG00000079355	Ackr4	atypical chemokine receptor 4 [Source:MGI Symbol;Acc:MGI:2181676]	9	7.25884	1.42914e-05	0.000588974	0.101537	0.735764
ENSMUSG00000021094	Dhrs7	dehydrogenase/reductase (SDR family) member 7 [Source:MGI Symbol;Acc:MGI:1913625]	12	2.29354	1.44981e-05	0.000594944	3.73156	8.55867
ENSMUSG00000103220	Gm37728	predicted gene, 37728 [Source:MGI Symbol;Acc:MGI:5610956]	6	2.67005	1.45099e-05	0.000594944	2.12996	5.70667
ENSMUSG00000038967	Pdk2	pyruvate dehydrogenase kinase, isoenzyme 2 [Source:MGI Symbol;Acc:MGI:1343087]	11	2.12937	1.46089e-05	0.000597487	18.2904	38.9458
ENSMUSG00000032334	Loxl1	lysyl oxidase-like 1 [Source:MGI Symbol;Acc:MGI:106096]	9	2.46842	1.52197e-05	0.000620896	26.1214	64.4651
ENSMUSG00000032232	Cgnl1	cingulin-like 1 [Source:MGI Symbol;Acc:MGI:1915428]	9	2.26783	1.69133e-05	0.00068825	25.7473	58.3864
ENSMUSG00000031965	Tbx20	T-box 20 [Source:MGI Symbol;Acc:MGI:1888496]	9	7.84428	1.72346e-05	0.000699561	0.107832	0.860679
ENSMUSG00000064210	Ano6	anoctamin 6 [Source:MGI Symbol;Acc:MGI:2145890]	15	2.12133	1.78346e-05	0.000722102	3.21964	6.82946
ENSMUSG00000019979	Apaf1	apoptotic peptidase activating factor 1 [Source:MGI Symbol;Acc:MGI:1306796]	10	-2.79259	1.87776e-05	0.000758382	2.89588	1.03414
ENSMUSG00000030402	Ppm1n	protein phosphatase, Mg2+/Mn2+ dependent, 1N (putative) [Source:MGI Symbol;Acc:MGI:2142330]	7	-3.4415	1.91526e-05	0.000771595	12.4084	3.59482
ENSMUSG00000022186	Oxct1	3-oxoacid CoA transferase 1 [Source:MGI Symbol;Acc:MGI:1914291]	15	2.19718	1.94494e-05	0.000781603	11.2865	24.8211
ENSMUSG00000022148	Fyb	FYN binding protein [Source:MGI Symbol;Acc:MGI:1346327]	15	4.31638	1.96492e-05	0.000787677	0.19882	0.869726
ENSMUSG00000053716	Dusp7	dual specificity phosphatase 7 [Source:MGI Symbol;Acc:MGI:2387100]	9	-2.34054	1.97387e-05	0.000789304	22.9531	9.80847
ENSMUSG00000030281	Il17rc	interleukin 17 receptor C [Source:MGI Symbol;Acc:MGI:2159336]	6	2.41855	1.98312e-05	0.000791044	3.14641	7.60363
ENSMUSG00000117358	Gm31645	predicted gene, 31645 [Source:MGI Symbol;Acc:MGI:5590804]	17	12.2344	2.00257e-05	0.000796836	0.0636539	0.863167
ENSMUSG00000044707	Ccnjl	cyclin J-like [Source:MGI Symbol;Acc:MGI:2685723]	11	2.52653	2.05507e-05	0.000815715	7.17144	18.1313
ENSMUSG00000026556	Vangl2	VANGL planar cell polarity 2 [Source:MGI Symbol;Acc:MGI:2135272]	1	2.4046	2.17252e-05	0.000859953	2.105	5.06259
ENSMUSG00000003617	Cp	ceruloplasmin [Source:MGI Symbol;Acc:MGI:88476]	3	2.32326	2.17716e-05	0.000859953	50.5808	117.509
ENSMUSG00000021318	Gli3	GLI-Kruppel family member GLI3 [Source:MGI Symbol;Acc:MGI:95729]	13	2.20703	2.20714e-05	0.000869665	3.62998	8.0083
ENSMUSG00000040147	Maob	monoamine oxidase B [Source:MGI Symbol;Acc:MGI:96916]	X	5.01007	2.21933e-05	0.000872342	0.489261	2.46503
ENSMUSG00000002104	Rapsn	receptor-associated protein of the synapse [Source:MGI Symbol;Acc:MGI:99422]	2	2.93637	2.27431e-05	0.000891783	2.67537	7.84803
ENSMUSG00000050370	Ch25h	cholesterol 25-hydroxylase [Source:MGI Symbol;Acc:MGI:1333869]	19	4.8529	2.32807e-05	0.000910653	5.06712	24.6663
ENSMUSG00000016150	Tenm1	teneurin transmembrane protein 1 [Source:MGI Symbol;Acc:MGI:1345185]	X	3.30796	2.34516e-05	0.000915123	0.840857	2.78733
ENSMUSG00000001768	Rin2	Ras and Rab interactor 2 [Source:MGI Symbol;Acc:MGI:1921280]	2	1.99597	2.35766e-05	0.000917782	3.86442	7.71074
ENSMUSG00000036523	Greb1	gene regulated by estrogen in breast cancer protein [Source:MGI Symbol;Acc:MGI:2149712]	12	3.3739	2.39954e-05	0.000931841	0.990682	3.35299
ENSMUSG00000004791	Pgf	placental growth factor [Source:MGI Symbol;Acc:MGI:105095]	12	3.79097	2.44392e-05	0.000945901	1.48965	5.66074
ENSMUSG00000103738	Gm37652	predicted gene, 37652 [Source:MGI Symbol;Acc:MGI:5610880]	3	12.6589	2.44746e-05	0.000945901	0.0563243	0.804739
ENSMUSG00000032246	Calml4	calmodulin-like 4 [Source:MGI Symbol;Acc:MGI:1922850]	9	7.0414	2.45984e-05	0.000946256	0.293671	2.07578
ENSMUSG00000021464	Ror2	receptor tyrosine kinase-like orphan receptor 2 [Source:MGI Symbol;Acc:MGI:1347521]	13	4.0448	2.46009e-05	0.000946256	0.337403	1.3782
ENSMUSG00000022358	Fbxo32	F-box protein 32 [Source:MGI Symbol;Acc:MGI:1914981]	15	2.14481	2.49457e-05	0.000956501	2.55075	5.46722
ENSMUSG00000038264	Sema7a	sema domain, immunoglobulin domain (Ig), and GPI membrane anchor, (semaphorin) 7A [Source:MGI Symbol;Acc:MGI:1306826]	9	-2.60685	2.49857e-05	0.000956501	6.83008	2.61421
ENSMUSG00000031246	Sh3bgrl	SH3-binding domain glutamic acid-rich protein like [Source:MGI Symbol;Acc:MGI:1930849]	X	2.08018	2.51575e-05	0.000960801	6.40193	13.3343
ENSMUSG00000025746	Il6	interleukin 6 [Source:MGI Symbol;Acc:MGI:96559]	5	5.46475	2.54458e-05	0.000969519	1.90962	10.4756
ENSMUSG00000050288	Fzd2	frizzled class receptor 2 [Source:MGI Symbol;Acc:MGI:1888513]	11	5.73807	2.60582e-05	0.000990519	0.351539	2.05009
ENSMUSG00000114996	Gm48958	predicted gene, 48958 [Source:MGI Symbol;Acc:MGI:6118289]	14	2.12019	2.61678e-05	0.000992348	5.30289	11.2506
ENSMUSG00000030786	Itgam	integrin alpha M [Source:MGI Symbol;Acc:MGI:96607]	7	12.7945	2.64929e-05	0.00100233	0.0173603	0.259338
ENSMUSG00000097648	9330185C12Rik	RIKEN cDNA 9330185C12 gene [Source:MGI Symbol;Acc:MGI:1924761]	1	10.6853	2.66827e-05	0.00100715	0.53642	5.90391
ENSMUSG00000003746	Man1a	mannosidase 1, alpha [Source:MGI Symbol;Acc:MGI:104677]	10	2.5719	2.68158e-05	0.00100981	0.889796	2.29375
ENSMUSG00000031351	Zfp185	zinc finger protein 185 [Source:MGI Symbol;Acc:MGI:108095]	X	2.12619	2.69348e-05	0.00101193	11.8099	25.1025
ENSMUSG00000019817	Plagl1	pleiomorphic adenoma gene-like 1 [Source:MGI Symbol;Acc:MGI:1100874]	10	2.74708	2.79785e-05	0.00104871	2.27884	6.27102
ENSMUSG00000051985	Igfn1	immunoglobulin-like and fibronectin type III domain containing 1 [Source:MGI Symbol;Acc:MGI:3045352]	1	2.46728	2.82904e-05	0.00105404	2.50898	6.19695
ENSMUSG00000032773	Chrm1	cholinergic receptor, muscarinic 1, CNS [Source:MGI Symbol;Acc:MGI:88396]	19	2.32202	2.82924e-05	0.00105404	2.15131	4.99687
ENSMUSG00000006462	A530013C23Rik	RIKEN cDNA A530013C23 gene [Source:MGI Symbol;Acc:MGI:3041178]	2	10.0369	2.83164e-05	0.00105404	0.0488784	0.496664
ENSMUSG00000020733	Slc9a3r1	solute carrier family 9 (sodium/hydrogen exchanger), member 3 regulator 1 [Source:MGI Symbol;Acc:MGI:1349482]	11	2.17027	2.84278e-05	0.00105575	9.99432	21.703
ENSMUSG00000038893	Fam117a	family with sequence similarity 117, member A [Source:MGI Symbol;Acc:MGI:2144564]	11	2.15052	2.95712e-05	0.00109569	3.49832	7.53368
ENSMUSG00000028542	Slc6a9	solute carrier family 6 (neurotransmitter transporter, glycine), member 9 [Source:MGI Symbol;Acc:MGI:95760]	4	2.85574	3.02636e-05	0.00111878	7.90694	22.5977
ENSMUSG00000024665	Fads2	fatty acid desaturase 2 [Source:MGI Symbol;Acc:MGI:1930079]	19	1.95362	3.08917e-05	0.0011394	16.8962	33.0069
ENSMUSG00000003228	Grk5	G protein-coupled receptor kinase 5 [Source:MGI Symbol;Acc:MGI:109161]	19	2.0892	3.12693e-05	0.00115069	2.40388	5.02926
ENSMUSG00000040489	Sox30	SRY (sex determining region Y)-box 30 [Source:MGI Symbol;Acc:MGI:1341157]	11	-7.23519	3.18391e-05	0.001169	3.16864	0.433763
ENSMUSG00000019889	Ptprk	protein tyrosine phosphatase, receptor type, K [Source:MGI Symbol;Acc:MGI:103310]	10	1.97417	3.2375e-05	0.00118099	6.81049	13.4433
ENSMUSG00000042279	H1f8	H1.8 linker histone [Source:MGI Symbol;Acc:MGI:2176207]	6	-5.12877	3.23844e-05	0.00118099	35.6904	6.96273
ENSMUSG00000023367	Tmem176a	transmembrane protein 176A [Source:MGI Symbol;Acc:MGI:1913308]	6	2.18557	3.23848e-05	0.00118099	4.68833	10.2518
ENSMUSG00000027215	Cd82	CD82 antigen [Source:MGI Symbol;Acc:MGI:104651]	2	2.08022	3.28107e-05	0.00119382	12.9174	26.8681
ENSMUSG00000049858	Suox	sulfite oxidase [Source:MGI Symbol;Acc:MGI:2446117]	10	2.32042	3.30415e-05	0.00119838	3.16582	7.35447
ENSMUSG00000041120	Nbl1	NBL1, DAN family BMP antagonist [Source:MGI Symbol;Acc:MGI:104591]	4	1.93138	3.30843e-05	0.00119838	45.4568	87.7914
ENSMUSG00000029287	Tgfbr3	transforming growth factor, beta receptor III [Source:MGI Symbol;Acc:MGI:104637]	5	1.91076	3.32752e-05	0.0012026	8.31485	15.8849
ENSMUSG00000038668	Lpar1	lysophosphatidic acid receptor 1 [Source:MGI Symbol;Acc:MGI:108429]	4	4.82614	3.35494e-05	0.0012098	0.195147	0.94788
ENSMUSG00000014773	Dll1	delta like canonical Notch ligand 1 [Source:MGI Symbol;Acc:MGI:104659]	17	3.05055	3.37099e-05	0.00121288	3.69948	11.3042
ENSMUSG00000036061	Smug1	single-strand selective monofunctional uracil DNA glycosylase [Source:MGI Symbol;Acc:MGI:1918976]	15	-2.78814	3.38452e-05	0.00121504	5.6953	2.03969
ENSMUSG00000057596	Trim30d	tripartite motif-containing 30D [Source:MGI Symbol;Acc:MGI:3035181]	7	4.72139	3.43416e-05	0.00123013	0.282096	1.33488
ENSMUSG00000034471	Caskin2	CASK-interacting protein 2 [Source:MGI Symbol;Acc:MGI:2157062]	11	1.90298	3.47605e-05	0.00124238	6.56608	12.4994
ENSMUSG00000053617	Sh3pxd2a	SH3 and PX domains 2A [Source:MGI Symbol;Acc:MGI:1298393]	19	2.01575	3.545e-05	0.00126246	3.0487	6.14584
ENSMUSG00000032558	Nphp3	nephronophthisis 3 (adolescent) [Source:MGI Symbol;Acc:MGI:1921275]	9	2.20888	3.54787e-05	0.00126246	1.22397	2.70491
ENSMUSG00000038260	Trpm4	transient receptor potential cation channel, subfamily M, member 4 [Source:MGI Symbol;Acc:MGI:1915917]	7	2.69439	3.57098e-05	0.0012679	0.377182	1.0193
ENSMUSG00000032291	Crabp1	cellular retinoic acid binding protein I [Source:MGI Symbol;Acc:MGI:88490]	9	3.89556	3.58159e-05	0.00126887	2.11614	8.32642
ENSMUSG00000055022	Cntn1	contactin 1 [Source:MGI Symbol;Acc:MGI:105980]	15	2.93656	3.63989e-05	0.00128671	4.78226	14.0535
ENSMUSG00000032369	Plscr1	phospholipid scramblase 1 [Source:MGI Symbol;Acc:MGI:893575]	9	2.64498	3.81943e-05	0.00134723	2.01515	5.33609
ENSMUSG00000058392	Rrp1b	ribosomal RNA processing 1B [Source:MGI Symbol;Acc:MGI:1919712]	17	-1.98245	3.95415e-05	0.00139171	9.38087	4.73178
ENSMUSG00000020029	Nudt4	nudix (nucleoside diphosphate linked moiety X)-type motif 4 [Source:MGI Symbol;Acc:MGI:1918457]	10	2.18168	3.99771e-05	0.00140398	103.386	225.545
ENSMUSG00000041936	Agrn	agrin [Source:MGI Symbol;Acc:MGI:87961]	4	2.02679	4.04814e-05	0.0014186	8.36636	16.9621
ENSMUSG00000097558	Gm26902	predicted gene, 26902 [Source:MGI Symbol;Acc:MGI:5477396]	19	4.42324	4.06742e-05	0.00142228	0.310152	1.3799
ENSMUSG00000111329	A830035O19Rik	RIKEN cDNA A830035O19 gene [Source:MGI Symbol;Acc:MGI:3704334]	9	7.26927	4.12533e-05	0.00143715	0.178381	1.34107
ENSMUSG00000020183	Cpm	carboxypeptidase M [Source:MGI Symbol;Acc:MGI:1917824]	10	-2.97546	4.12776e-05	0.00143715	2.88211	0.967344
ENSMUSG00000103560	Gm38070	predicted gene, 38070 [Source:MGI Symbol;Acc:MGI:5611298]	1	7.90641	4.15173e-05	0.00144193	0.125458	0.989469
ENSMUSG00000038775	Vill	villin-like [Source:MGI Symbol;Acc:MGI:1201781]	9	4.22256	4.15932e-05	0.00144193	0.383921	1.61459
ENSMUSG00000005640	Insrr	insulin receptor-related receptor [Source:MGI Symbol;Acc:MGI:1346037]	3	9.64502	4.22263e-05	0.00146074	0.618478	6.00175
ENSMUSG00000068270	Shroom4	shroom family member 4 [Source:MGI Symbol;Acc:MGI:2685570]	X	2.97951	4.39976e-05	0.00151876	0.270739	0.808994
ENSMUSG00000034701	Neurod1	neurogenic differentiation 1 [Source:MGI Symbol;Acc:MGI:1339708]	2	-2.85063	4.61323e-05	0.00158906	45.1074	15.8184
ENSMUSG00000035208	Slfn8	schlafen 8 [Source:MGI Symbol;Acc:MGI:2672859]	11	3.83441	4.6995e-05	0.00161533	0.508077	1.96923
ENSMUSG00000020053	Igf1	insulin-like growth factor 1 [Source:MGI Symbol;Acc:MGI:96432]	10	3.3794	4.79496e-05	0.00164464	1.00756	3.41546
ENSMUSG00000058420	Syt17	synaptotagmin XVII [Source:MGI Symbol;Acc:MGI:104966]	7	2.90496	4.86524e-05	0.0016638	0.615156	1.79222
ENSMUSG00000037405	Icam1	intercellular adhesion molecule 1 [Source:MGI Symbol;Acc:MGI:96392]	9	4.00633	4.87377e-05	0.0016638	6.91134	27.7032
ENSMUSG00000104713	Gbp6	guanylate binding protein 6 [Source:MGI Symbol;Acc:MGI:2140937]	5	3.76362	4.8878e-05	0.0016638	0.28791	1.09272
ENSMUSG00000002602	Axl	AXL receptor tyrosine kinase [Source:MGI Symbol;Acc:MGI:1347244]	7	2.2601	4.89202e-05	0.0016638	3.81943	8.64047
ENSMUSG00000050840	Cdh20	cadherin 20 [Source:MGI Symbol;Acc:MGI:1346069]	1	3.46313	4.93788e-05	0.00167587	1.49821	5.21219
ENSMUSG00000031241	Tbx22	T-box 22 [Source:MGI Symbol;Acc:MGI:2389465]	X	8.00626	5.05427e-05	0.00171178	0.104459	0.869696
ENSMUSG00000029153	Ociad2	OCIA domain containing 2 [Source:MGI Symbol;Acc:MGI:1916377]	5	2.09421	5.11106e-05	0.00172739	6.1988	12.975
ENSMUSG00000047730	Fcgbp	Fc fragment of IgG binding protein [Source:MGI Symbol;Acc:MGI:2444336]	7	6.45271	5.20873e-05	0.00175578	0.111919	0.736494
ENSMUSG00000056492	Adgrf5	adhesion G protein-coupled receptor F5 [Source:MGI Symbol;Acc:MGI:2182928]	17	3.52449	5.21681e-05	0.00175578	1.40132	4.94998
ENSMUSG00000109416	Gm44863	predicted gene 44863 [Source:MGI Symbol;Acc:MGI:5753439]	7	-8.19067	5.27058e-05	0.00177019	1.09364	0.125517
ENSMUSG00000024601	Isoc1	isochorismatase domain containing 1 [Source:MGI Symbol;Acc:MGI:1913557]	18	2.13066	5.61081e-05	0.00188055	4.61596	9.82998
ENSMUSG00000032502	Stac	src homology three (SH3) and cysteine rich domain [Source:MGI Symbol;Acc:MGI:1201400]	9	3.47116	5.6257e-05	0.00188164	2.29161	7.97261
ENSMUSG00000043003	Rasef	RAS and EF hand domain containing [Source:MGI Symbol;Acc:MGI:2448565]	4	6.09309	5.64188e-05	0.00188315	0.966356	5.91839
ENSMUSG00000039385	Cdh6	cadherin 6 [Source:MGI Symbol;Acc:MGI:107435]	15	3.47787	6.22648e-05	0.00207026	0.426164	1.48951
ENSMUSG00000024247	Pkdcc	protein kinase domain containing, cytoplasmic [Source:MGI Symbol;Acc:MGI:2147077]	17	2.0129	6.22807e-05	0.00207026	5.40845	10.8918
ENSMUSG00000086050	Gm16045	predicted gene 16045 [Source:MGI Symbol;Acc:MGI:3801990]	11	8.30581	6.24543e-05	0.00207177	0.0705529	0.625971
ENSMUSG00000087301	Gm13629	predicted gene 13629 [Source:MGI Symbol;Acc:MGI:3650683]	2	-9.3465	6.2681e-05	0.00207502	1.57736	0.166795
ENSMUSG00000003644	Rps6ka1	ribosomal protein S6 kinase polypeptide 1 [Source:MGI Symbol;Acc:MGI:104558]	4	2.5529	6.29296e-05	0.00207899	1.73821	4.43429
ENSMUSG00000106073	Gm42892	predicted gene 42892 [Source:MGI Symbol;Acc:MGI:5663029]	3	13.4392	6.31351e-05	0.00208153	0.0464856	0.66295
ENSMUSG00000090363	Gm3512	predicted gene 3512 [Source:MGI Symbol;Acc:MGI:3781689]	14	7.79435	6.61089e-05	0.00217513	0.120353	0.954465
ENSMUSG00000035873	Pawr	PRKC, apoptosis, WT1, regulator [Source:MGI Symbol;Acc:MGI:2149961]	10	-2.05034	6.67708e-05	0.00219244	34.7879	16.9624
ENSMUSG00000039934	Gsap	gamma-secretase activating protein [Source:MGI Symbol;Acc:MGI:2442259]	5	3.06234	6.86039e-05	0.00224807	0.438208	1.35025
ENSMUSG00000004328	Hif3a	hypoxia inducible factor 3, alpha subunit [Source:MGI Symbol;Acc:MGI:1859778]	7	3.78325	6.99352e-05	0.00228705	0.367214	1.39422
ENSMUSG00000024039	Cbs	cystathionine beta-synthase [Source:MGI Symbol;Acc:MGI:88285]	17	2.54365	7.44055e-05	0.00242833	1.06348	2.70008
ENSMUSG00000022747	St3gal6	ST3 beta-galactoside alpha-2,3-sialyltransferase 6 [Source:MGI Symbol;Acc:MGI:1888707]	16	4.021	7.54708e-05	0.00245813	0.235218	0.95678
ENSMUSG00000068299	Nat8f4	N-acetyltransferase 8 (GCN5-related) family member 4 [Source:MGI Symbol;Acc:MGI:1922791]	6	3.83815	7.7204e-05	0.00250952	0.98103	3.79392
ENSMUSG00000018340	Anxa6	annexin A6 [Source:MGI Symbol;Acc:MGI:88255]	11	1.94507	7.86304e-05	0.00255075	11.7582	22.8726
ENSMUSG00000042567	Nek10	NIMA (never in mitosis gene a)- related kinase 10 [Source:MGI Symbol;Acc:MGI:2685128]	14	-6.64186	8.09989e-05	0.00262232	0.224684	0.0331031
ENSMUSG00000000253	Gmpr	guanosine monophosphate reductase [Source:MGI Symbol;Acc:MGI:1913605]	13	2.62083	8.26904e-05	0.00267173	1.79829	4.73687
ENSMUSG00000063428	Ddo	D-aspartate oxidase [Source:MGI Symbol;Acc:MGI:1925528]	10	2.56122	8.37312e-05	0.00269996	0.552431	1.41252
ENSMUSG00000108348	Gm42372	predicted gene, 42372 [Source:MGI Symbol;Acc:MGI:5625257]	7	-4.87774	8.68926e-05	0.00279631	3.19429	0.650889
ENSMUSG00000022419	Deptor	DEP domain containing MTOR-interacting protein [Source:MGI Symbol;Acc:MGI:2146322]	15	3.8246	8.78052e-05	0.00282007	0.940212	3.60781
ENSMUSG00000097835	Gm26910	predicted gene, 26910 [Source:MGI Symbol;Acc:MGI:5477404]	18	-3.21766	9.11529e-05	0.00292041	14.1931	4.38912
ENSMUSG00000070509	Rgma	repulsive guidance molecule family member A [Source:MGI Symbol;Acc:MGI:2679262]	7	2.04539	9.12912e-05	0.00292041	3.30848	6.77002
ENSMUSG00000009772	Nuak2	NUAK family, SNF1-like kinase, 2 [Source:MGI Symbol;Acc:MGI:1921387]	1	2.24859	9.35298e-05	0.00298611	3.21866	7.25672
ENSMUSG00000034739	Mfrp	membrane frizzled-related protein [Source:MGI Symbol;Acc:MGI:2385957]	9	3.85246	9.41044e-05	0.00299854	2.76368	10.6716
ENSMUSG00000027227	Sord	sorbitol dehydrogenase [Source:MGI Symbol;Acc:MGI:98266]	2	2.55356	9.46254e-05	0.0030092	5.27962	13.4619
ENSMUSG00000110767	Gm31432	predicted gene, 31432 [Source:MGI Symbol;Acc:MGI:5590591]	9	6.80317	9.7534e-05	0.0030956	0.551298	3.94013
ENSMUSG00000104017	Gm37363	predicted gene, 37363 [Source:MGI Symbol;Acc:MGI:5610591]	1	4.80598	9.79801e-05	0.00310366	0.358722	1.71877
ENSMUSG00000112117	Rmst	rhabdomyosarcoma 2 associated transcript (non-coding RNA) [Source:MGI Symbol;Acc:MGI:1099806]	10	2.5182	0.000100454	0.00317579	0.768831	1.94091
ENSMUSG00000038457	Tmem255b	transmembrane protein 255B [Source:MGI Symbol;Acc:MGI:2685533]	8	-2.97613	0.000101131	0.00319095	8.28846	2.78813
ENSMUSG00000085006	BC021767	cDNA sequence BC021767 [Source:MGI Symbol;Acc:MGI:3615512]	3	3.46552	0.000103014	0.00324404	1.25434	4.37128
ENSMUSG00000038235	F11r	F11 receptor [Source:MGI Symbol;Acc:MGI:1321398]	1	1.9941	0.000103561	0.00325493	5.86239	11.6887
ENSMUSG00000037709	Fam13a	family with sequence similarity 13, member A [Source:MGI Symbol;Acc:MGI:1889842]	6	3.21936	0.000104684	0.00328383	0.775264	2.50591
ENSMUSG00000004951	Hspb1	heat shock protein 1 [Source:MGI Symbol;Acc:MGI:96240]	5	2.41595	0.00010691	0.00334716	66.9805	161.87
ENSMUSG00000046623	Gjb4	gap junction protein, beta 4 [Source:MGI Symbol;Acc:MGI:95722]	4	-5.28945	0.000107509	0.00335941	8.02116	1.51938
ENSMUSG00000031618	Nr3c2	nuclear receptor subfamily 3, group C, member 2 [Source:MGI Symbol;Acc:MGI:99459]	8	1.93808	0.000110057	0.00343236	5.07388	9.84122
ENSMUSG00000028207	Asph	aspartate-beta-hydroxylase [Source:MGI Symbol;Acc:MGI:1914186]	4	1.89423	0.000112097	0.00348616	10.1194	19.168
ENSMUSG00000021099	Six6	sine oculis-related homeobox 6 [Source:MGI Symbol;Acc:MGI:1341840]	12	2.18653	0.000112213	0.00348616	4.40419	9.64605
ENSMUSG00000016087	Fli1	Friend leukemia integration 1 [Source:MGI Symbol;Acc:MGI:95554]	9	8.48527	0.000113411	0.0035166	0.0608245	0.5492
ENSMUSG00000110424	1700012D14Rik	RIKEN cDNA 1700012D14 gene [Source:MGI Symbol;Acc:MGI:1922729]	7	-3.95955	0.000113963	0.00352695	1.19839	0.300051
ENSMUSG00000048636	A730049H05Rik	RIKEN cDNA A730049H05 gene [Source:MGI Symbol;Acc:MGI:1921766]	6	6.32893	0.000114998	0.00355217	0.216285	1.3654
ENSMUSG00000024892	Pcx	pyruvate carboxylase [Source:MGI Symbol;Acc:MGI:97520]	19	2.13802	0.000116368	0.00358765	4.38768	9.38207
ENSMUSG00000034320	Slc26a2	solute carrier family 26 (sulfate transporter), member 2 [Source:MGI Symbol;Acc:MGI:892977]	18	-2.3738	0.000120519	0.00370854	6.14385	2.58732
ENSMUSG00000106472	Gm43111	predicted gene 43111 [Source:MGI Symbol;Acc:MGI:5663248]	5	6.39569	0.000122248	0.0037546	0.211621	1.38324
ENSMUSG00000044674	Fzd1	frizzled class receptor 1 [Source:MGI Symbol;Acc:MGI:1196625]	5	2.88062	0.00012522	0.00383859	4.42188	12.7379
ENSMUSG00000045053	Kcng3	potassium voltage-gated channel, subfamily G, member 3 [Source:MGI Symbol;Acc:MGI:2663923]	17	5.50795	0.000126324	0.0038651	0.118465	0.669719
ENSMUSG00000040605	Bace2	beta-site APP-cleaving enzyme 2 [Source:MGI Symbol;Acc:MGI:1860440]	16	4.0209	0.000127724	0.00390053	0.761526	3.07032
ENSMUSG00000038393	Txnip	thioredoxin interacting protein [Source:MGI Symbol;Acc:MGI:1889549]	3	3.19627	0.000132566	0.00404077	2.68579	8.61702
ENSMUSG00000028599	Tnfrsf1b	tumor necrosis factor receptor superfamily, member 1b [Source:MGI Symbol;Acc:MGI:1314883]	4	4.41614	0.000132907	0.00404352	1.85472	8.22317
ENSMUSG00000005125	Ndrg1	N-myc downstream regulated gene 1 [Source:MGI Symbol;Acc:MGI:1341799]	15	1.91402	0.000133314	0.00404829	21.6199	41.3852
ENSMUSG00000097415	AU020206	expressed sequence AU020206 [Source:MGI Symbol;Acc:MGI:2142134]	7	3.17807	0.000134151	0.00406605	0.564889	1.81175
ENSMUSG00000022885	St6gal1	beta galactoside alpha 2,6 sialyltransferase 1 [Source:MGI Symbol;Acc:MGI:108470]	16	2.34963	0.000135859	0.00411012	1.53042	3.59938
ENSMUSG00000029659	Medag	mesenteric estrogen dependent adipogenesis [Source:MGI Symbol;Acc:MGI:1917967]	5	2.63416	0.000136906	0.00413217	1.58562	4.17733
ENSMUSG00000046733	Gprc5a	G protein-coupled receptor, family C, group 5, member A [Source:MGI Symbol;Acc:MGI:1891250]	6	-2.20306	0.0001371	0.00413217	15.3446	6.96406
ENSMUSG00000042195	Slc35f2	solute carrier family 35, member F2 [Source:MGI Symbol;Acc:MGI:1919272]	9	6.62024	0.000140157	0.00421645	0.139784	0.973975
ENSMUSG00000098132	Rassf10	Ras association (RalGDS/AF-6) domain family (N-terminal) member 10 [Source:MGI Symbol;Acc:MGI:1925998]	7	4.13321	0.000140424	0.00421662	0.425317	1.78634
ENSMUSG00000105504	Gbp5	guanylate binding protein 5 [Source:MGI Symbol;Acc:MGI:2429943]	3	5.72206	0.000141159	0.00422582	0.593734	3.40985
ENSMUSG00000021127	Zfp36l1	zinc finger protein 36, C3H type-like 1 [Source:MGI Symbol;Acc:MGI:107946]	12	2.56656	0.000141253	0.00422582	21.9374	56.3316
ENSMUSG00000027580	Helz2	helicase with zinc finger 2, transcriptional coactivator [Source:MGI Symbol;Acc:MGI:2385169]	2	2.31584	0.000141608	0.00422791	1.61867	3.7519
ENSMUSG00000069516	Lyz2	lysozyme 2 [Source:MGI Symbol;Acc:MGI:96897]	10	2.7746	0.000141846	0.00422791	3.66097	10.2118
ENSMUSG00000005994	Tyrp1	tyrosinase-related protein 1 [Source:MGI Symbol;Acc:MGI:98881]	4	3.17279	0.000145016	0.0043079	6.03974	19.1813
ENSMUSG00000015340	Cybb	cytochrome b-245, beta polypeptide [Source:MGI Symbol;Acc:MGI:88574]	X	5.08828	0.000145063	0.0043079	0.219207	1.13676
ENSMUSG00000073490	Ifi207	interferon activated gene 207 [Source:MGI Symbol;Acc:MGI:2138302]	1	4.59439	0.000148704	0.00440227	0.248358	1.16042
ENSMUSG00000026822	Lcn2	lipocalin 2 [Source:MGI Symbol;Acc:MGI:96757]	2	5.49536	0.000148786	0.00440227	11.0449	60.7339
ENSMUSG00000040584	Abcb1a	ATP-binding cassette, sub-family B (MDR/TAP), member 1A [Source:MGI Symbol;Acc:MGI:97570]	5	2.23426	0.000149215	0.00440689	1.2177	2.72606
ENSMUSG00000020099	Unc5b	unc-5 netrin receptor B [Source:MGI Symbol;Acc:MGI:894703]	10	2.72299	0.000151098	0.00445435	1.19489	3.2591
ENSMUSG00000097254	C430042M11Rik	RIKEN cDNA C430042M11 gene [Source:MGI Symbol;Acc:MGI:2443186]	17	-9.43283	0.000154786	0.00455477	0.903889	0.0854373
ENSMUSG00000104435	Gm37422	predicted gene, 37422 [Source:MGI Symbol;Acc:MGI:5610650]	1	4.74158	0.000156862	0.00460746	0.127567	0.606739
ENSMUSG00000070639	Lrrc8b	leucine rich repeat containing 8 family, member B [Source:MGI Symbol;Acc:MGI:2141353]	5	-1.98523	0.00015904	0.00466297	10.7729	5.4274
ENSMUSG00000040009	Gnaz	guanine nucleotide binding protein, alpha z subunit [Source:MGI Symbol;Acc:MGI:95780]	10	-2.20063	0.00016012	0.00468611	20.1542	9.15613
ENSMUSG00000053113	Socs3	suppressor of cytokine signaling 3 [Source:MGI Symbol;Acc:MGI:1201791]	11	3.15846	0.000160729	0.00469543	131.495	415.336
ENSMUSG00000031673	Cdh11	cadherin 11 [Source:MGI Symbol;Acc:MGI:99217]	8	2.48214	0.000162708	0.00474467	1.49603	3.71863
ENSMUSG00000055447	Cd47	CD47 antigen (Rh-related antigen, integrin-associated signal transducer) [Source:MGI Symbol;Acc:MGI:96617]	16	1.7976	0.000164004	0.00477079	11.0819	19.9237
ENSMUSG00000021799	Opn4	opsin 4 (melanopsin) [Source:MGI Symbol;Acc:MGI:1353425]	14	2.8279	0.000164292	0.00477079	1.04147	2.9421
ENSMUSG00000027661	Slc2a10	solute carrier family 2 (facilitated glucose transporter), member 10 [Source:MGI Symbol;Acc:MGI:2156687]	2	7.49148	0.00016449	0.00477079	0.0524438	0.410053
ENSMUSG00000100627	A830008E24Rik	RIKEN cDNA A830008E24 gene [Source:MGI Symbol;Acc:MGI:3041183]	1	8.91728	0.000165159	0.00477748	0.0468719	0.446582
ENSMUSG00000002910	Arrdc2	arrestin domain containing 2 [Source:MGI Symbol;Acc:MGI:1918057]	8	2.4928	0.000165312	0.00477748	2.63429	6.59161
ENSMUSG00000069917	Hba-a2	hemoglobin alpha, adult chain 2 [Source:MGI Symbol;Acc:MGI:96016]	11	4.4444	0.000166461	0.00480211	10.1755	45.3734
ENSMUSG00000026395	Ptprc	protein tyrosine phosphatase, receptor type, C [Source:MGI Symbol;Acc:MGI:97810]	1	3.13394	0.00016755	0.00482489	0.102663	0.322867
ENSMUSG00000022237	Ankrd33b	ankyrin repeat domain 33B [Source:MGI Symbol;Acc:MGI:1917904]	15	-2.53103	0.000168903	0.0048552	30.8439	12.1856
ENSMUSG00000030987	Stim1	stromal interaction molecule 1 [Source:MGI Symbol;Acc:MGI:107476]	7	2.05279	0.000173314	0.00497317	4.87132	10.0054
ENSMUSG00000042073	Abhd14b	abhydrolase domain containing 14b [Source:MGI Symbol;Acc:MGI:1923741]	9	2.2003	0.000173724	0.0049761	4.9062	10.8246
ENSMUSG00000004562	Arhgef40	Rho guanine nucleotide exchange factor (GEF) 40 [Source:MGI Symbol;Acc:MGI:2685515]	14	1.96279	0.000175044	0.00500065	4.92402	9.66717
ENSMUSG00000024525	Impa2	inositol monophosphatase 2 [Source:MGI Symbol;Acc:MGI:2149728]	18	3.58249	0.000175201	0.00500065	0.263469	0.944962
ENSMUSG00000045333	Zfp423	zinc finger protein 423 [Source:MGI Symbol;Acc:MGI:1891217]	8	1.87627	0.000176033	0.00500847	7.95472	14.926
ENSMUSG00000070687	Htr1d	5-hydroxytryptamine (serotonin) receptor 1D [Source:MGI Symbol;Acc:MGI:96276]	4	-3.08158	0.000176095	0.00500847	30.9034	10.0277
ENSMUSG00000031216	Stard8	START domain containing 8 [Source:MGI Symbol;Acc:MGI:2448556]	X	3.59281	0.000176945	0.0050238	0.555548	2.01067
ENSMUSG00000118487	Gm50464	predicted gene, 50464 [Source:MGI Symbol;Acc:MGI:6324731]	8	5.82844	0.000178733	0.00506566	0.839209	5.09274
ENSMUSG00000047735	Samd9l	sterile alpha motif domain containing 9-like [Source:MGI Symbol;Acc:MGI:1343184]	6	3.79702	0.000180091	0.00509522	0.858844	3.25511
ENSMUSG00000036533	Cdc42ep3	CDC42 effector protein (Rho GTPase binding) 3 [Source:MGI Symbol;Acc:MGI:2384718]	17	-2.82693	0.000180691	0.00510325	11.809	4.16682
ENSMUSG00000026358	Rgs1	regulator of G-protein signaling 1 [Source:MGI Symbol;Acc:MGI:1354694]	1	4.95658	0.000181591	0.00511971	0.062888	0.316733
ENSMUSG00000051855	Mest	mesoderm specific transcript [Source:MGI Symbol;Acc:MGI:96968]	6	2.59718	0.000181964	0.00512019	16.4675	42.7822
ENSMUSG00000021708	Rasgrf2	RAS protein-specific guanine nucleotide-releasing factor 2 [Source:MGI Symbol;Acc:MGI:109137]	13	-2.58199	0.000182241	0.00512019	13.7767	5.33393
ENSMUSG00000109864	Eid3	EP300 interacting inhibitor of differentiation 3 [Source:MGI Symbol;Acc:MGI:1913591]	10	2.15013	0.000185932	0.00521483	12.2791	26.3749
ENSMUSG00000079470	Utp14b	UTP14B small subunit processome component [Source:MGI Symbol;Acc:MGI:2445092]	1	1.98291	0.000192981	0.00540312	11.5186	22.8445
ENSMUSG00000032845	Alpk2	alpha-kinase 2 [Source:MGI Symbol;Acc:MGI:2449492]	18	-4.15918	0.000195983	0.00547769	3.24352	0.779677
ENSMUSG00000033715	Akr1c14	aldo-keto reductase family 1, member C14 [Source:MGI Symbol;Acc:MGI:2145458]	13	6.16799	0.000196497	0.00548258	0.15149	0.928631
ENSMUSG00000044921	Rassf9	Ras association (RalGDS/AF-6) domain family (N-terminal) member 9 [Source:MGI Symbol;Acc:MGI:2384307]	10	9.00049	0.000199672	0.00556156	0.102012	0.946577
ENSMUSG00000021367	Edn1	endothelin 1 [Source:MGI Symbol;Acc:MGI:95283]	13	4.68689	0.000200449	0.00557359	2.01893	9.49702
ENSMUSG00000018459	Slc13a3	solute carrier family 13 (sodium-dependent dicarboxylate transporter), member 3 [Source:MGI Symbol;Acc:MGI:2149635]	2	10.7467	0.000205656	0.00570174	0.351695	3.812
ENSMUSG00000052331	Ankrd44	ankyrin repeat domain 44 [Source:MGI Symbol;Acc:MGI:3045243]	1	1.83428	0.000205764	0.00570174	3.673	6.73776
ENSMUSG00000025407	Gli1	GLI-Kruppel family member GLI1 [Source:MGI Symbol;Acc:MGI:95727]	10	6.59075	0.000207111	0.00571853	0.101852	0.691977
ENSMUSG00000034116	Vav1	vav 1 oncogene [Source:MGI Symbol;Acc:MGI:98923]	17	6.68806	0.000207246	0.00571853	0.150936	1.04822
ENSMUSG00000039533	Mmd2	monocyte to macrophage differentiation-associated 2 [Source:MGI Symbol;Acc:MGI:1922354]	5	-2.71655	0.000207432	0.00571853	3.03602	1.11518
ENSMUSG00000032194	Kank2	KN motif and ankyrin repeat domains 2 [Source:MGI Symbol;Acc:MGI:2384568]	9	1.90277	0.000208943	0.00575039	6.37638	12.1257
ENSMUSG00000036949	Slc39a12	solute carrier family 39 (zinc transporter), member 12 [Source:MGI Symbol;Acc:MGI:2139274]	2	2.2117	0.000209606	0.00575668	4.58321	10.1304
ENSMUSG00000041650	Pcca	propionyl-Coenzyme A carboxylase, alpha polypeptide [Source:MGI Symbol;Acc:MGI:97499]	14	1.92825	0.000209885	0.00575668	3.54759	6.84776
ENSMUSG00000030560	Ctsc	cathepsin C [Source:MGI Symbol;Acc:MGI:109553]	7	2.23311	0.00021574	0.00590725	4.2558	9.50078
ENSMUSG00000028581	Laptm5	lysosomal-associated protein transmembrane 5 [Source:MGI Symbol;Acc:MGI:108046]	4	3.34237	0.000217848	0.00595487	0.570341	1.9159
ENSMUSG00000074227	Spint2	serine protease inhibitor, Kunitz type 2 [Source:MGI Symbol;Acc:MGI:1338031]	7	1.83905	0.000218594	0.00596518	11.3427	20.8637
ENSMUSG00000059456	Ptk2b	PTK2 protein tyrosine kinase 2 beta [Source:MGI Symbol;Acc:MGI:104908]	14	3.96481	0.000219454	0.00597854	1.82643	7.25635
ENSMUSG00000039304	Tnfsf10	tumor necrosis factor (ligand) superfamily, member 10 [Source:MGI Symbol;Acc:MGI:107414]	3	5.22016	0.000224021	0.00609269	0.231017	1.20516
ENSMUSG00000004568	Arhgef18	rho/rac guanine nucleotide exchange factor (GEF) 18 [Source:MGI Symbol;Acc:MGI:2142567]	8	1.8826	0.000227272	0.00617073	3.64107	6.85601
ENSMUSG00000047216	Cdh19	cadherin 19, type 2 [Source:MGI Symbol;Acc:MGI:3588198]	1	6.07163	0.000237753	0.00644446	0.148628	0.924282
ENSMUSG00000102568	Gm37040	predicted gene, 37040 [Source:MGI Symbol;Acc:MGI:5610268]	9	10.5747	0.000240309	0.00650283	0.233464	2.59743
ENSMUSG00000106149	Gm43430	predicted gene 43430 [Source:MGI Symbol;Acc:MGI:5663567]	3	2.9556	0.000242223	0.00654368	1.40144	4.1459
ENSMUSG00000062991	Nrg1	neuregulin 1 [Source:MGI Symbol;Acc:MGI:96083]	8	-2.77957	0.000244934	0.00660585	1.88873	0.680034
ENSMUSG00000075592	Nynrin	NYN domain and retroviral integrase containing [Source:MGI Symbol;Acc:MGI:2652872]	14	2.31484	0.000247158	0.00665473	3.17316	7.34327
ENSMUSG00000059248	Septin9	septin 9 [Source:MGI Symbol;Acc:MGI:1858222]	11	3.18435	0.000252612	0.00678762	5.2414	16.6984
ENSMUSG00000030551	Nr2f2	nuclear receptor subfamily 2, group F, member 2 [Source:MGI Symbol;Acc:MGI:1352452]	7	2.88082	0.000253075	0.00678762	1.12238	3.242
ENSMUSG00000025545	Clybl	citrate lyase beta like [Source:MGI Symbol;Acc:MGI:1916884]	14	2.32634	0.000253354	0.00678762	3.26593	7.60766
ENSMUSG00000049969	Plekhf2	pleckstrin homology domain containing, family F (with FYVE domain) member 2 [Source:MGI Symbol;Acc:MGI:1919051]	4	-2.06462	0.000255506	0.00683393	20.3202	9.83893
ENSMUSG00000053646	Plxnb1	plexin B1 [Source:MGI Symbol;Acc:MGI:2154238]	9	1.85286	0.000263543	0.00703725	14.1837	26.2836
ENSMUSG00000025915	Sgk3	serum/glucocorticoid regulated kinase 3 [Source:MGI Symbol;Acc:MGI:2182368]	1	2.80238	0.000264671	0.00705572	0.194464	0.547117
ENSMUSG00000045817	Zfp36l2	zinc finger protein 36, C3H type-like 2 [Source:MGI Symbol;Acc:MGI:107945]	17	1.81895	0.000268775	0.00715096	36.2072	65.8669
ENSMUSG00000026072	Il1r1	interleukin 1 receptor, type I [Source:MGI Symbol;Acc:MGI:96545]	1	3.36073	0.00026924	0.00715096	1.96993	6.628
ENSMUSG00000043953	Ccrl2	chemokine (C-C motif) receptor-like 2 [Source:MGI Symbol;Acc:MGI:1920904]	9	7.65887	0.000269572	0.00715096	0.0964219	0.764396
ENSMUSG00000060733	Ipmk	inositol polyphosphate multikinase [Source:MGI Symbol;Acc:MGI:1916968]	10	-1.87312	0.000273488	0.00724296	16.7637	8.95088
ENSMUSG00000060204	Slc10a4-ps	solute carrier family 10 (sodium/bile acid cotransporter family), pseudogene [Source:MGI Symbol;Acc:MGI:3645333]	5	-6.61264	0.000275438	0.00728265	0.738089	0.105513
ENSMUSG00000106918	Mrpl33	mitochondrial ribosomal protein L33 [Source:MGI Symbol;Acc:MGI:2137225]	5	2.44923	0.000276811	0.0072967	0.916385	2.25408
ENSMUSG00000056501	Cebpb	CCAAT/enhancer binding protein (C/EBP), beta [Source:MGI Symbol;Acc:MGI:88373]	2	2.13059	0.000276873	0.0072967	87.0575	185.519
ENSMUSG00000040612	Ildr2	immunoglobulin-like domain containing receptor 2 [Source:MGI Symbol;Acc:MGI:1196370]	1	1.93786	0.000279884	0.00736406	14.0643	27.2515
ENSMUSG00000063887	Nlgn1	neuroligin 1 [Source:MGI Symbol;Acc:MGI:2179435]	3	2.28133	0.000280846	0.00737734	1.08858	2.48613
ENSMUSG00000029759	Pon3	paraoxonase 3 [Source:MGI Symbol;Acc:MGI:106686]	6	2.61192	0.000282953	0.00742062	1.34091	3.5056
ENSMUSG00000025150	Cbr2	carbonyl reductase 2 [Source:MGI Symbol;Acc:MGI:107200]	11	5.2725	0.000288371	0.00754971	0.613354	3.25496
ENSMUSG00000027075	Slc43a1	solute carrier family 43, member 1 [Source:MGI Symbol;Acc:MGI:1931352]	2	7.61286	0.00028881	0.00754971	0.0426279	0.338967
ENSMUSG00000020101	Vsir	V-set immunoregulatory receptor [Source:MGI Symbol;Acc:MGI:1921298]	10	4.45148	0.000289967	0.00756773	0.182291	0.822603
ENSMUSG00000080928	Hmgb1-ps6	high mobility group box 1, pseudogene 6 [Source:MGI Symbol;Acc:MGI:3776507]	16	-3.34335	0.000292774	0.00762865	6.40122	1.90937
ENSMUSG00000028459	Cd72	CD72 antigen [Source:MGI Symbol;Acc:MGI:88345]	4	3.55915	0.000294662	0.00766549	0.250597	0.904326
ENSMUSG00000064330	Pde6h	phosphodiesterase 6H, cGMP-specific, cone, gamma [Source:MGI Symbol;Acc:MGI:1925850]	6	-4.962	0.000296197	0.00769302	2.1715	0.434846
ENSMUSG00000053560	Ier2	immediate early response 2 [Source:MGI Symbol;Acc:MGI:104815]	8	1.99418	0.000297611	0.00771735	107.123	213.645
ENSMUSG00000097354	2310001H17Rik	RIKEN cDNA 2310001H17 gene [Source:MGI Symbol;Acc:MGI:1923682]	6	2.81707	0.000298747	0.00773439	0.271686	0.769952
ENSMUSG00000031838	Ifi30	interferon gamma inducible protein 30 [Source:MGI Symbol;Acc:MGI:2137648]	8	2.27405	0.00030112	0.00778334	7.61457	17.3779
ENSMUSG00000060275	Nrg2	neuregulin 2 [Source:MGI Symbol;Acc:MGI:1098246]	18	1.84547	0.000304796	0.00786579	6.70858	12.3762
ENSMUSG00000033880	Lgals3bp	lectin, galactoside-binding, soluble, 3 binding protein [Source:MGI Symbol;Acc:MGI:99554]	11	2.27614	0.000311537	0.00802019	8.13279	18.5087
ENSMUSG00000039410	Prdm16	PR domain containing 16 [Source:MGI Symbol;Acc:MGI:1917923]	4	2.79996	0.000311772	0.00802019	0.365074	1.02798
ENSMUSG00000019872	Smpdl3a	sphingomyelin phosphodiesterase, acid-like 3A [Source:MGI Symbol;Acc:MGI:1931437]	10	2.83154	0.000319246	0.00819939	1.44539	4.1077
ENSMUSG00000005803	Sqor	sulfide quinone oxidoreductase [Source:MGI Symbol;Acc:MGI:1929899]	2	2.33366	0.000321562	0.00824577	1.31421	3.06079
ENSMUSG00000031383	Dusp9	dual specificity phosphatase 9 [Source:MGI Symbol;Acc:MGI:2387107]	X	-9.89246	0.000324253	0.0083016	0.463292	0.0405313
ENSMUSG00000051860	Samd7	sterile alpha motif domain containing 7 [Source:MGI Symbol;Acc:MGI:1923203]	3	-2.78984	0.000328477	0.00839644	42.0363	15.0693
ENSMUSG00000034783	Cd207	CD207 antigen [Source:MGI Symbol;Acc:MGI:2180021]	6	-5.47462	0.000331799	0.00846795	1.52064	0.268501
ENSMUSG00000040624	Plekhg1	pleckstrin homology domain containing, family G (with RhoGef domain) member 1 [Source:MGI Symbol;Acc:MGI:2676551]	10	1.93007	0.00034664	0.00883277	5.54561	10.7017
ENSMUSG00000022199	Slc22a17	solute carrier family 22 (organic cation transporter), member 17 [Source:MGI Symbol;Acc:MGI:1926225]	14	1.82049	0.000351721	0.00894673	16.8166	30.6227
ENSMUSG00000026519	Tmem63a	transmembrane protein 63a [Source:MGI Symbol;Acc:MGI:2384789]	1	2.64013	0.00035222	0.00894673	1.00856	2.66771
ENSMUSG00000036040	Adamtsl2	ADAMTS-like 2 [Source:MGI Symbol;Acc:MGI:1925044]	2	3.71279	0.000355953	0.00902734	0.504482	1.88241
ENSMUSG00000035274	Tpbg	trophoblast glycoprotein [Source:MGI Symbol;Acc:MGI:1341264]	9	3.43632	0.000359904	0.00911323	6.49286	22.3163
ENSMUSG00000062542	Syt9	synaptotagmin IX [Source:MGI Symbol;Acc:MGI:1926373]	7	2.21962	0.000364679	0.00921971	6.21062	13.805
ENSMUSG00000032649	Colgalt2	collagen beta(1-O)galactosyltransferase 2 [Source:MGI Symbol;Acc:MGI:2138232]	1	2.07967	0.000366886	0.00926102	8.07901	16.7923
ENSMUSG00000035805	Mlc1	megalencephalic leukoencephalopathy with subcortical cysts 1 homolog (human) [Source:MGI Symbol;Acc:MGI:2157910]	15	1.86508	0.000371864	0.00937202	11.0475	20.6164
ENSMUSG00000085794	Vax2os	ventral anterior homeobox 2, opposite strand [Source:MGI Symbol;Acc:MGI:3583301]	6	-2.75966	0.000373493	0.0093984	16.8834	6.11509
ENSMUSG00000037921	Ddx60	DExD/H box helicase 60 [Source:MGI Symbol;Acc:MGI:2384570]	8	2.37795	0.000378266	0.00950371	0.796062	1.88895
ENSMUSG00000027832	Ptx3	pentraxin related gene [Source:MGI Symbol;Acc:MGI:104641]	3	4.4278	0.000384328	0.00964103	22.8763	101.316
ENSMUSG00000026303	Mlph	melanophilin [Source:MGI Symbol;Acc:MGI:2176380]	1	3.25425	0.000389166	0.00974726	1.21651	3.97414
ENSMUSG00000048038	Ccdc187	coiled-coil domain containing 187 [Source:MGI Symbol;Acc:MGI:3045295]	2	2.8335	0.000391919	0.00980101	0.464239	1.31773
ENSMUSG00000009585	Apobec3	apolipoprotein B mRNA editing enzyme, catalytic polypeptide 3 [Source:MGI Symbol;Acc:MGI:1933111]	15	2.20421	0.000396855	0.0099091	0.803942	1.77224
ENSMUSG00000046312	Myorg	myogenesis regulating glycosidase (putative) [Source:MGI Symbol;Acc:MGI:2140300]	4	2.88938	0.000401658	0.0100127	0.912097	2.64649
ENSMUSG00000028261	Ndufaf4	NADH:ubiquinone oxidoreductase complex assembly factor 4 [Source:MGI Symbol;Acc:MGI:1915743]	4	-2.16118	0.000402245	0.0100127	4.61435	2.13454
ENSMUSG00000052837	Junb	jun B proto-oncogene [Source:MGI Symbol;Acc:MGI:96647]	8	2.25972	0.000403159	0.01002	166.051	375.245
ENSMUSG00000032531	Amotl2	angiomotin-like 2 [Source:MGI Symbol;Acc:MGI:1929286]	9	1.95138	0.000404286	0.0100326	29.0585	56.7004
ENSMUSG00000034177	Rnf43	ring finger protein 43 [Source:MGI Symbol;Acc:MGI:2442609]	11	1.94419	0.000411168	0.0101878	1.90337	3.70199
ENSMUSG00000075284	Wipf1	WAS/WASL interacting protein family, member 1 [Source:MGI Symbol;Acc:MGI:2178801]	2	3.80305	0.000414435	0.010253	0.185906	0.717273
ENSMUSG00000038776	Ephx1	epoxide hydrolase 1, microsomal [Source:MGI Symbol;Acc:MGI:95405]	1	1.94975	0.000419635	0.0103509	21.7388	42.3663
ENSMUSG00000051439	Cd14	CD14 antigen [Source:MGI Symbol;Acc:MGI:88318]	18	4.27446	0.000419675	0.0103509	2.14252	9.22756
ENSMUSG00000045827	Serpinb9	serine (or cysteine) peptidase inhibitor, clade B, member 9 [Source:MGI Symbol;Acc:MGI:106603]	13	2.49467	0.000421784	0.0103871	1.59851	3.97909
ENSMUSG00000030711	Sult1a1	sulfotransferase family 1A, phenol-preferring, member 1 [Source:MGI Symbol;Acc:MGI:102896]	7	2.99723	0.000423439	0.010412	1.5812	4.7675
ENSMUSG00000029675	Eln	elastin [Source:MGI Symbol;Acc:MGI:95317]	5	3.166	0.000437431	0.0107397	0.675633	2.15096
ENSMUSG00000024063	Lbh	limb-bud and heart [Source:MGI Symbol;Acc:MGI:1925139]	17	-1.81088	0.000438696	0.0107544	20.9251	11.5507
ENSMUSG00000027750	Postn	periostin, osteoblast specific factor [Source:MGI Symbol;Acc:MGI:1926321]	3	5.42037	0.00044241	0.010829	0.0943281	0.525447
ENSMUSG00000021892	Sh3bp5	SH3-domain binding protein 5 (BTK-associated) [Source:MGI Symbol;Acc:MGI:1344391]	14	2.28436	0.000443089	0.0108292	3.15496	7.22864
ENSMUSG00000024036	Slc37a1	solute carrier family 37 (glycerol-3-phosphate transporter), member 1 [Source:MGI Symbol;Acc:MGI:2446181]	17	3.2896	0.000455087	0.0111056	0.127043	0.423846
ENSMUSG00000023411	Nfatc4	nuclear factor of activated T cells, cytoplasmic, calcineurin dependent 4 [Source:MGI Symbol;Acc:MGI:1920431]	14	2.41292	0.000456139	0.0111145	0.9851	2.38013
ENSMUSG00000042228	Lyn	LYN proto-oncogene, Src family tyrosine kinase [Source:MGI Symbol;Acc:MGI:96892]	4	3.11368	0.000465113	0.0113161	0.747521	2.34526
ENSMUSG00000050199	Lgr4	leucine-rich repeat-containing G protein-coupled receptor 4 [Source:MGI Symbol;Acc:MGI:1891468]	2	1.91856	0.000470174	0.011422	16.011	30.7164
ENSMUSG00000021665	Hexb	hexosaminidase B [Source:MGI Symbol;Acc:MGI:96074]	13	1.95208	0.000477758	0.0115889	12.2445	23.8856
ENSMUSG00000024411	Aqp4	aquaporin 4 [Source:MGI Symbol;Acc:MGI:107387]	18	1.74543	0.000479676	0.0116179	23.2832	40.6387
ENSMUSG00000029314	Gpat3	glycerol-3-phosphate acyltransferase 3 [Source:MGI Symbol;Acc:MGI:3603816]	5	-3.70798	0.000490692	0.011867	5.01717	1.35152
ENSMUSG00000021253	Tgfb3	transforming growth factor, beta 3 [Source:MGI Symbol;Acc:MGI:98727]	12	2.03151	0.000499864	0.0120707	2.82598	5.74421
ENSMUSG00000052428	Tmco1	transmembrane and coiled-coil domains 1 [Source:MGI Symbol;Acc:MGI:1921173]	1	1.75764	0.00051281	0.0123648	5.48056	9.62958
ENSMUSG00000066595	Flvcr1	feline leukemia virus subgroup C cellular receptor 1 [Source:MGI Symbol;Acc:MGI:2444881]	1	1.99805	0.000514823	0.0123949	5.65565	11.2968
ENSMUSG00000026121	Sema4c	sema domain, immunoglobulin domain (Ig), transmembrane domain (TM) and short cytoplasmic domain, (semaphorin) 4C [Source:MGI Symbol;Acc:MGI:109252]	1	2.08067	0.000516369	0.0124136	5.77145	12.0146
ENSMUSG00000000794	Kcnn3	potassium intermediate/small conductance calcium-activated channel, subfamily N, member 3 [Source:MGI Symbol;Acc:MGI:2153183]	3	4.0047	0.000527101	0.0126528	0.262051	1.05949
ENSMUSG00000040717	Il17rd	interleukin 17 receptor D [Source:MGI Symbol;Acc:MGI:2159727]	14	2.19735	0.000532991	0.012757	1.11213	2.44009
ENSMUSG00000091908	Gm17231	predicted gene 17231 [Source:MGI Symbol;Acc:MGI:4938058]	9	-6.68564	0.000533024	0.012757	3.25704	0.475702
ENSMUSG00000020018	Snrpf	small nuclear ribonucleoprotein polypeptide F [Source:MGI Symbol;Acc:MGI:1917128]	10	-2.14985	0.00054071	0.0129218	31.0116	14.4113
ENSMUSG00000061928	Dsg1b	desmoglein 1 beta [Source:MGI Symbol;Acc:MGI:2664357]	18	5.48105	0.000545314	0.013008	0.199239	1.11011
ENSMUSG00000022040	Ephx2	epoxide hydrolase 2, cytoplasmic [Source:MGI Symbol;Acc:MGI:99500]	14	1.7453	0.000545926	0.013008	12.4016	21.6444
ENSMUSG00000079481	Nhsl2	NHS-like 2 [Source:MGI Symbol;Acc:MGI:3645090]	X	2.53384	0.000562973	0.0133944	0.585372	1.48786
ENSMUSG00000049420	Tmem200a	transmembrane protein 200A [Source:MGI Symbol;Acc:MGI:1924470]	10	2.95545	0.000566884	0.0134677	0.596346	1.77294
ENSMUSG00000047409	Ctdspl	CTD (carboxy-terminal domain, RNA polymerase II, polypeptide A) small phosphatase-like [Source:MGI Symbol;Acc:MGI:1916524]	9	2.13626	0.000572818	0.0135886	2.2654	4.84119
ENSMUSG00000027284	Cdan1	congenital dyserythropoietic anemia, type I (human) [Source:MGI Symbol;Acc:MGI:1916218]	2	-1.98525	0.000574177	0.0136009	5.01574	2.5252
ENSMUSG00000019066	Rab3d	RAB3D, member RAS oncogene family [Source:MGI Symbol;Acc:MGI:97844]	9	2.41587	0.00058004	0.0137197	1.53139	3.6963
ENSMUSG00000089940	Gm4117	predicted gene 4117 [Source:MGI Symbol;Acc:MGI:3782293]	13	6.1941	0.000589925	0.0139331	0.0185865	0.117831
ENSMUSG00000042743	Sgtb	small glutamine-rich tetratricopeptide repeat (TPR)-containing, beta [Source:MGI Symbol;Acc:MGI:2444615]	13	-1.73604	0.000592764	0.0139797	18.7096	10.7787
ENSMUSG00000020044	Timp3	tissue inhibitor of metalloproteinase 3 [Source:MGI Symbol;Acc:MGI:98754]	10	2.09011	0.000595367	0.0140206	94.8294	198.209
ENSMUSG00000006345	Ggt1	gamma-glutamyltransferase 1 [Source:MGI Symbol;Acc:MGI:95706]	10	2.10953	0.000597674	0.0140443	2.55128	5.3723
ENSMUSG00000056144	Trim34a	tripartite motif-containing 34A [Source:MGI Symbol;Acc:MGI:2137359]	7	4.16813	0.000598111	0.0140443	0.233545	0.997334
ENSMUSG00000019139	Isyna1	myo-inositol 1-phosphate synthase A1 [Source:MGI Symbol;Acc:MGI:1919030]	8	1.74565	0.00060875	0.0142734	9.62855	16.8203
ENSMUSG00000003526	Prodh	proline dehydrogenase [Source:MGI Symbol;Acc:MGI:97770]	16	1.91745	0.000621126	0.0145424	2.86474	5.50076
ENSMUSG00000041301	Cftr	cystic fibrosis transmembrane conductance regulator [Source:MGI Symbol;Acc:MGI:88388]	6	3.79597	0.000627233	0.0146642	0.156022	0.599541
ENSMUSG00000025647	Shisa5	shisa family member 5 [Source:MGI Symbol;Acc:MGI:1915044]	9	2.09542	0.000636533	0.0148601	2.04445	4.28829
ENSMUSG00000020990	Cdkl1	cyclin-dependent kinase-like 1 (CDC2-related kinase) [Source:MGI Symbol;Acc:MGI:1918341]	12	3.35329	0.000643599	0.0149998	0.852912	2.89905
ENSMUSG00000039384	Dusp10	dual specificity phosphatase 10 [Source:MGI Symbol;Acc:MGI:1927070]	1	-3.91581	0.000644375	0.0149998	24.5058	6.25717
ENSMUSG00000024349	Sting1	stimulator of interferon response cGAMP interactor 1 [Source:MGI Symbol;Acc:MGI:1919762]	18	3.60271	0.000651709	0.0151227	0.659048	2.37369
ENSMUSG00000095217	H2bc15	H2B clustered histone 15 [Source:MGI Symbol;Acc:MGI:2448407]	13	-3.76004	0.000652433	0.0151227	8.73601	2.31991
ENSMUSG00000108398	Gm30191	predicted gene, 30191 [Source:MGI Symbol;Acc:MGI:5589350]	4	-7.54986	0.000652463	0.0151227	2.52538	0.314816
ENSMUSG00000028469	Npr2	natriuretic peptide receptor 2 [Source:MGI Symbol;Acc:MGI:97372]	4	1.68266	0.000657532	0.0152184	8.12288	13.6654
ENSMUSG00000021255	Esrrb	estrogen related receptor, beta [Source:MGI Symbol;Acc:MGI:1346832]	12	-2.60067	0.000662234	0.0153053	40.7539	15.6684
ENSMUSG00000013076	Amotl1	angiomotin-like 1 [Source:MGI Symbol;Acc:MGI:1922973]	9	1.87096	0.00067283	0.0155193	9.91582	18.549
ENSMUSG00000108955	Gm44775	predicted gene 44775 [Source:MGI Symbol;Acc:MGI:5753351]	8	4.5716	0.000673417	0.0155193	0.318857	1.48499
ENSMUSG00000086228	Ubap1l	ubiquitin-associated protein 1-like [Source:MGI Symbol;Acc:MGI:2685360]	9	-2.67123	0.000685288	0.0157704	38.7063	14.4864
ENSMUSG00000003420	Fcgrt	Fc fragment of IgG receptor and transporter [Source:MGI Symbol;Acc:MGI:103017]	7	2.18047	0.000694545	0.0159607	7.73868	16.8535
ENSMUSG00000085996	A830012C17Rik	RIKEN cDNA A830012C17 gene [Source:MGI Symbol;Acc:MGI:2441830]	4	4.47909	0.000695659	0.0159636	0.50471	2.25014
ENSMUSG00000038349	Plcl1	phospholipase C-like 1 [Source:MGI Symbol;Acc:MGI:3036262]	1	1.81531	0.000707873	0.0161737	2.84109	5.16354
ENSMUSG00000030268	Bcat1	branched chain aminotransferase 1, cytosolic [Source:MGI Symbol;Acc:MGI:104861]	6	-2.5972	0.000708372	0.0161737	8.1696	3.14363
ENSMUSG00000031093	Dock11	dedicator of cytokinesis 11 [Source:MGI Symbol;Acc:MGI:1923224]	X	2.78871	0.000708588	0.0161737	0.284711	0.796679
ENSMUSG00000071369	Map3k5	mitogen-activated protein kinase kinase kinase 5 [Source:MGI Symbol;Acc:MGI:1346876]	10	1.77356	0.000708817	0.0161737	9.39759	16.6636
ENSMUSG00000074415	Mir100hg	Mir100 Mirlet7a-2 Mir125b-1 cluster host gene [Source:MGI Symbol;Acc:MGI:1920394]	9	2.19196	0.000716452	0.0163141	1.4746	3.23242
ENSMUSG00000015766	Eps8	epidermal growth factor receptor pathway substrate 8 [Source:MGI Symbol;Acc:MGI:104684]	6	-2.26403	0.000716993	0.0163141	4.02279	1.77603
ENSMUSG00000045659	Plekha7	pleckstrin homology domain containing, family A member 7 [Source:MGI Symbol;Acc:MGI:2445094]	7	1.70496	0.000724277	0.0164567	6.51118	11.1017
ENSMUSG00000025321	Itgb8	integrin beta 8 [Source:MGI Symbol;Acc:MGI:1338035]	12	2.0534	0.000736875	0.0167021	2.48182	5.09707
ENSMUSG00000023046	Igfbp6	insulin-like growth factor binding protein 6 [Source:MGI Symbol;Acc:MGI:96441]	15	3.78983	0.000737148	0.0167021	1.66542	6.3703
ENSMUSG00000061259	Tmprss11d	transmembrane protease, serine 11d [Source:MGI Symbol;Acc:MGI:2385221]	5	7.43299	0.00074152	0.0167777	0.189894	1.43289
ENSMUSG00000032548	Slco2a1	solute carrier organic anion transporter family, member 2a1 [Source:MGI Symbol;Acc:MGI:1346021]	9	-3.52567	0.000749346	0.016931	3.72028	1.05568
ENSMUSG00000038602	Slc35f1	solute carrier family 35, member F1 [Source:MGI Symbol;Acc:MGI:2139810]	10	1.85963	0.000752534	0.0169793	4.32686	8.0485
ENSMUSG00000043259	Fam13c	family with sequence similarity 13, member C [Source:MGI Symbol;Acc:MGI:1918971]	10	2.5611	0.0007554	0.0170202	1.37424	3.52891
ENSMUSG00000000628	Hk2	hexokinase 2 [Source:MGI Symbol;Acc:MGI:1315197]	6	-1.99491	0.000756676	0.0170231	176.662	88.5565
ENSMUSG00000023990	Tfeb	transcription factor EB [Source:MGI Symbol;Acc:MGI:103270]	17	2.17868	0.000757638	0.0170231	1.81051	3.94864
ENSMUSG00000046186	Cd109	CD109 antigen [Source:MGI Symbol;Acc:MGI:2445221]	9	-4.00941	0.00076098	0.0170745	4.25132	1.06057
ENSMUSG00000048899	Rimkla	ribosomal modification protein rimK-like family member A [Source:MGI Symbol;Acc:MGI:3040686]	4	-2.92615	0.000763496	0.0171072	2.07949	0.707317
ENSMUSG00000038422	Hdhd3	haloacid dehalogenase-like hydrolase domain containing 3 [Source:MGI Symbol;Acc:MGI:1919998]	4	6.46657	0.000776201	0.0173678	0.587099	3.84209
ENSMUSG00000038855	Itpkb	inositol 1,4,5-trisphosphate 3-kinase B [Source:MGI Symbol;Acc:MGI:109235]	1	1.9645	0.00078124	0.0174563	2.4557	4.83048
ENSMUSG00000039672	Kcne2	potassium voltage-gated channel, Isk-related subfamily, gene 2 [Source:MGI Symbol;Acc:MGI:1891123]	16	-3.50984	0.000782579	0.0174604	4.84346	1.36975
ENSMUSG00000020747	Tmem94	transmembrane protein 94 [Source:MGI Symbol;Acc:MGI:1919197]	11	1.75829	0.000783583	0.0174604	5.03937	8.86444
ENSMUSG00000102461	Gm37166	predicted gene, 37166 [Source:MGI Symbol;Acc:MGI:5610394]	9	-3.49472	0.000814261	0.018119	1.45422	0.414638
ENSMUSG00000107320	Gm42549	predicted gene 42549 [Source:MGI Symbol;Acc:MGI:5662686]	6	-3.01787	0.000816893	0.0181526	0.630846	0.206918
ENSMUSG00000024909	Efemp2	epidermal growth factor-containing fibulin-like extracellular matrix protein 2 [Source:MGI Symbol;Acc:MGI:1891209]	19	1.93377	0.00082324	0.0182685	3.71451	7.17918
ENSMUSG00000026480	Ncf2	neutrophil cytosolic factor 2 [Source:MGI Symbol;Acc:MGI:97284]	1	3.7772	0.000837753	0.0185419	1.01773	3.84537
ENSMUSG00000037490	Slc2a12	solute carrier family 2 (facilitated glucose transporter), member 12 [Source:MGI Symbol;Acc:MGI:3052471]	10	2.82299	0.000837856	0.0185419	0.698551	1.97042
ENSMUSG00000105124	Gm5297	predicted gene 5297 [Source:MGI Symbol;Acc:MGI:3646414]	5	-2.58988	0.000856987	0.0189313	8.00702	3.07553
ENSMUSG00000037362	Ccn3	cellular communication network factor 3 [Source:MGI Symbol;Acc:MGI:109185]	15	-3.30568	0.000857799	0.0189313	1.97383	0.595467
ENSMUSG00000024987	Cyp26a1	cytochrome P450, family 26, subfamily a, polypeptide 1 [Source:MGI Symbol;Acc:MGI:1096359]	19	-2.10731	0.000863315	0.0190271	124.241	58.9598
ENSMUSG00000102990	Gm37764	predicted gene, 37764 [Source:MGI Symbol;Acc:MGI:5610992]	1	-2.91483	0.000868014	0.0191046	6.97237	2.38456
ENSMUSG00000086291	Gm15513	predicted gene 15513 [Source:MGI Symbol;Acc:MGI:3782961]	5	-3.0227	0.000874734	0.0192211	18.467	6.10336
ENSMUSG00000047250	Ptgs1	prostaglandin-endoperoxide synthase 1 [Source:MGI Symbol;Acc:MGI:97797]	2	6.03046	0.000876376	0.0192211	0.196156	1.21486
ENSMUSG00000069793	Slfn9	schlafen 9 [Source:MGI Symbol;Acc:MGI:2445121]	11	2.67446	0.000876876	0.0192211	0.711339	1.9033
ENSMUSG00000090582	Gm17024	predicted gene 17024 [Source:MGI Symbol;Acc:MGI:4937851]	12	2.23201	0.000887171	0.0193954	30.8712	68.9333
ENSMUSG00000090919	Pabpc4l	poly(A) binding protein, cytoplasmic 4-like [Source:MGI Symbol;Acc:MGI:3643087]	3	7.55756	0.000887228	0.0193954	0.0545085	0.430196
ENSMUSG00000022656	Nectin3	nectin cell adhesion molecule 3 [Source:MGI Symbol;Acc:MGI:1930171]	16	2.05974	0.000893423	0.0195044	15.3445	31.603
ENSMUSG00000031790	Mmp15	matrix metallopeptidase 15 [Source:MGI Symbol;Acc:MGI:109320]	8	2.04714	0.000896884	0.0195535	1.91124	3.91481
ENSMUSG00000009376	Met	met proto-oncogene [Source:MGI Symbol;Acc:MGI:96969]	6	2.57906	0.000915724	0.0199374	1.17233	3.02327
ENSMUSG00000019796	Lrp11	low density lipoprotein receptor-related protein 11 [Source:MGI Symbol;Acc:MGI:2442989]	10	-2.6235	0.000919105	0.019984	7.03086	2.67977
ENSMUSG00000044033	Ccdc141	coiled-coil domain containing 141 [Source:MGI Symbol;Acc:MGI:1919735]	2	2.33913	0.0009429	0.0204739	1.07419	2.51735
ENSMUSG00000032691	Nlrp3	NLR family, pyrin domain containing 3 [Source:MGI Symbol;Acc:MGI:2653833]	11	4.43783	0.000946142	0.0205167	0.189048	0.8634
ENSMUSG00000045287	Rtn4rl1	reticulon 4 receptor-like 1 [Source:MGI Symbol;Acc:MGI:2661375]	11	1.71497	0.000954892	0.0206732	9.88131	16.9571
ENSMUSG00000037419	Endod1	endonuclease domain containing 1 [Source:MGI Symbol;Acc:MGI:1919196]	9	1.77835	0.000955919	0.0206732	7.0977	12.6223
ENSMUSG00000043556	Fbxl7	F-box and leucine-rich repeat protein 7 [Source:MGI Symbol;Acc:MGI:3052506]	15	2.54909	0.000958712	0.0207059	0.438756	1.12283
ENSMUSG00000026896	Ifih1	interferon induced with helicase C domain 1 [Source:MGI Symbol;Acc:MGI:1918836]	2	2.66875	0.000960783	0.0207229	0.405043	1.08843
ENSMUSG00000116305	Lncppara	long noncoding RNA near Ppara [Source:MGI Symbol;Acc:MGI:5568843]	15	2.3	0.000971	0.0209153	4.41403	10.169
ENSMUSG00000014791	Elmo3	engulfment and cell motility 3 [Source:MGI Symbol;Acc:MGI:2679007]	8	1.97209	0.000978443	0.0210476	2.92839	5.76559
ENSMUSG00000044456	Rin3	Ras and Rab interactor 3 [Source:MGI Symbol;Acc:MGI:2385708]	12	3.11526	0.00100197	0.0215251	0.220663	0.695202
ENSMUSG00000008398	Elk3	ELK3, member of ETS oncogene family [Source:MGI Symbol;Acc:MGI:101762]	10	2.32657	0.00100374	0.0215345	0.86734	2.01722
ENSMUSG00000040554	Aipl1	aryl hydrocarbon receptor-interacting protein-like 1 [Source:MGI Symbol;Acc:MGI:2148800]	11	-2.43005	0.00100684	0.0215723	60.4216	24.8593
ENSMUSG00000037010	Apln	apelin [Source:MGI Symbol;Acc:MGI:1353624]	X	-4.93806	0.0010129	0.0216455	0.481095	0.093227
ENSMUSG00000021662	Arhgef28	Rho guanine nucleotide exchange factor (GEF) 28 [Source:MGI Symbol;Acc:MGI:1346016]	13	1.94469	0.00101294	0.0216455	1.17419	2.28745
ENSMUSG00000029513	Prkab1	protein kinase, AMP-activated, beta 1 non-catalytic subunit [Source:MGI Symbol;Acc:MGI:1336167]	5	-1.85657	0.00101865	0.0217389	22.7905	12.2759
ENSMUSG00000030921	Trim30a	tripartite motif-containing 30A [Source:MGI Symbol;Acc:MGI:98178]	7	2.94903	0.00102117	0.0217638	0.392868	1.17055
ENSMUSG00000024500	Ppp2r2b	protein phosphatase 2, regulatory subunit B, beta [Source:MGI Symbol;Acc:MGI:1920180]	18	-1.80998	0.00102802	0.021881	24.6237	13.6031
ENSMUSG00000030772	Dkk3	dickkopf WNT signaling pathway inhibitor 3 [Source:MGI Symbol;Acc:MGI:1354952]	7	1.95788	0.00103406	0.0219805	564.114	1104.46
ENSMUSG00000085574	Gm13053	predicted gene 13053 [Source:MGI Symbol;Acc:MGI:3651989]	4	3.90155	0.00104606	0.0221897	1.05618	4.23449
ENSMUSG00000001986	Gria3	glutamate receptor, ionotropic, AMPA3 (alpha 3) [Source:MGI Symbol;Acc:MGI:95810]	X	2.77286	0.00104765	0.0221897	1.2674	3.52212
ENSMUSG00000020734	Grin2c	glutamate receptor, ionotropic, NMDA2C (epsilon 3) [Source:MGI Symbol;Acc:MGI:95822]	11	-4.71693	0.00104872	0.0221897	0.452841	0.0929196
ENSMUSG00000042428	Mgat3	mannoside acetylglucosaminyltransferase 3 [Source:MGI Symbol;Acc:MGI:104532]	15	1.82983	0.00104939	0.0221897	4.74494	8.68413
ENSMUSG00000056752	Dnah9	dynein, axonemal, heavy chain 9 [Source:MGI Symbol;Acc:MGI:1289279]	11	-2.31038	0.00105187	0.0222131	2.42783	1.05015
ENSMUSG00000036169	Sostdc1	sclerostin domain containing 1 [Source:MGI Symbol;Acc:MGI:1913292]	12	3.46754	0.00106553	0.022472	1.08685	3.78132
ENSMUSG00000070462	Tlnrd1	talin rod domain containing 1 [Source:MGI Symbol;Acc:MGI:1891420]	7	-2.13001	0.00106793	0.0224933	14.1458	6.63856
ENSMUSG00000022793	B4galt4	UDP-Gal:betaGlcNAc beta 1,4-galactosyltransferase, polypeptide 4 [Source:MGI Symbol;Acc:MGI:1928387]	16	2.14987	0.00107374	0.0225863	1.5931	3.42448
ENSMUSG00000049804	Armcx4	armadillo repeat containing, X-linked 4 [Source:MGI Symbol;Acc:MGI:2147887]	X	1.789	0.00108032	0.0226736	4.8194	8.62799
ENSMUSG00000039691	Tspan10	tetraspanin 10 [Source:MGI Symbol;Acc:MGI:2384781]	11	3.07367	0.0010807	0.0226736	0.994949	3.08262
ENSMUSG00000053626	Tll1	tolloid-like [Source:MGI Symbol;Acc:MGI:106923]	8	2.43009	0.00108562	0.0227226	1.0061	2.45298
ENSMUSG00000000247	Lhx2	LIM homeobox protein 2 [Source:MGI Symbol;Acc:MGI:96785]	2	2.59358	0.00108585	0.0227226	3.99387	10.3768
ENSMUSG00000022528	Hes1	hes family bHLH transcription factor 1 [Source:MGI Symbol;Acc:MGI:104853]	16	2.07898	0.00108854	0.0227254	6.85967	14.2428
ENSMUSG00000097021	4933433G15Rik	RIKEN cDNA 4933433G15 gene [Source:MGI Symbol;Acc:MGI:1918524]	9	-3.29675	0.0010888	0.0227254	2.40625	0.728246
ENSMUSG00000035933	Cog5	component of oligomeric golgi complex 5 [Source:MGI Symbol;Acc:MGI:2145130]	12	1.6835	0.00109623	0.0228511	5.58107	9.39871
ENSMUSG00000026546	Cfap45	cilia and flagella associated protein 45 [Source:MGI Symbol;Acc:MGI:1919120]	1	5.68236	0.00111121	0.0230984	0.0535367	0.314732
ENSMUSG00000007476	Lrrc8a	leucine rich repeat containing 8A VRAC subunit A [Source:MGI Symbol;Acc:MGI:2652847]	2	2.21938	0.00111171	0.0230984	1.16003	2.58515
ENSMUSG00000057969	Sema3b	sema domain, immunoglobulin domain (Ig), short basic domain, secreted, (semaphorin) 3B [Source:MGI Symbol;Acc:MGI:107561]	9	1.81451	0.00111239	0.0230984	7.28651	13.2131
ENSMUSG00000021071	Trim9	tripartite motif-containing 9 [Source:MGI Symbol;Acc:MGI:2137354]	12	1.75761	0.00112246	0.0232778	8.21618	14.4399
ENSMUSG00000040841	Six5	sine oculis-related homeobox 5 [Source:MGI Symbol;Acc:MGI:106220]	7	2.37014	0.00112884	0.0233801	4.12981	9.79233
ENSMUSG00000092203	1110038B12Rik	RIKEN cDNA 1110038B12 gene [Source:MGI Symbol;Acc:MGI:1916013]	17	-2.71054	0.00113269	0.0234297	3.567	1.30462
ENSMUSG00000030730	Atp2a1	ATPase, Ca++ transporting, cardiac muscle, fast twitch 1 [Source:MGI Symbol;Acc:MGI:105058]	7	-9.34465	0.0011349	0.0234454	1.16782	0.122639
ENSMUSG00000042510	AA986860	expressed sequence AA986860 [Source:MGI Symbol;Acc:MGI:2138143]	1	-1.99393	0.00114046	0.0235302	8.81625	4.42271
ENSMUSG00000061758	Akr1b10	aldo-keto reductase family 1, member B10 (aldose reductase) [Source:MGI Symbol;Acc:MGI:1915111]	6	2.51119	0.00114453	0.023584	0.707414	1.77544
ENSMUSG00000024197	Plin3	perilipin 3 [Source:MGI Symbol;Acc:MGI:1914155]	17	1.95137	0.00115079	0.0236457	2.20354	4.29814
ENSMUSG00000102918	Pcdhgc3	protocadherin gamma subfamily C, 3 [Source:MGI Symbol;Acc:MGI:1935201]	18	1.64001	0.00115087	0.0236457	9.7262	15.9524
ENSMUSG00000044083	Efcab8	EF-hand calcium binding domain 8 [Source:MGI Symbol;Acc:MGI:3644206]	2	-3.14517	0.00115191	0.0236457	1.06755	0.339176
ENSMUSG00000058498	Rnf207	ring finger protein 207 [Source:MGI Symbol;Acc:MGI:2684989]	4	-2.59493	0.00116027	0.0237756	15.4246	5.94138
ENSMUSG00000053846	Lipg	lipase, endothelial [Source:MGI Symbol;Acc:MGI:1341803]	18	4.17639	0.00116118	0.0237756	0.588439	2.47488
ENSMUSG00000032000	Birc3	baculoviral IAP repeat-containing 3 [Source:MGI Symbol;Acc:MGI:1197007]	9	2.27088	0.00116623	0.0238486	6.2108	14.1027
ENSMUSG00000072620	Slfn2	schlafen 2 [Source:MGI Symbol;Acc:MGI:1313258]	11	4.19894	0.00117774	0.0240536	1.52746	6.43105
ENSMUSG00000034295	Fhod3	formin homology 2 domain containing 3 [Source:MGI Symbol;Acc:MGI:1925847]	18	-2.55523	0.00117974	0.0240639	19.074	7.46315
ENSMUSG00000059213	Ddn	dendrin [Source:MGI Symbol;Acc:MGI:108101]	15	3.98136	0.00118511	0.024143	0.123912	0.499123
ENSMUSG00000052544	St6galnac3	ST6 (alpha-N-acetyl-neuraminyl-2,3-beta-galactosyl-1,3)-N-acetylgalactosaminide alpha-2,6-sialyltransferase 3 [Source:MGI Symbol;Acc:MGI:1341828]	3	2.57184	0.00119075	0.0242274	0.237455	0.613082
ENSMUSG00000046743	Fat4	FAT atypical cadherin 4 [Source:MGI Symbol;Acc:MGI:3045256]	3	2.14334	0.00120565	0.0244997	21.5551	46.201
ENSMUSG00000040552	C3ar1	complement component 3a receptor 1 [Source:MGI Symbol;Acc:MGI:1097680]	6	6.54908	0.00120781	0.0245128	0.0552125	0.382852
ENSMUSG00000036867	Smad6	SMAD family member 6 [Source:MGI Symbol;Acc:MGI:1336883]	9	2.93408	0.00121127	0.0245522	2.46106	7.22045
ENSMUSG00000043448	Gjc2	gap junction protein, gamma 2 [Source:MGI Symbol;Acc:MGI:2153060]	11	-6.7905	0.00121787	0.0246551	0.741358	0.102785
ENSMUSG00000002578	Ikzf4	IKAROS family zinc finger 4 [Source:MGI Symbol;Acc:MGI:1343139]	10	1.79206	0.00123591	0.0249888	4.51309	8.08674
ENSMUSG00000020601	Trib2	tribbles pseudokinase 2 [Source:MGI Symbol;Acc:MGI:2145021]	12	-2.20754	0.00124448	0.0251094	16.8483	7.62891
ENSMUSG00000035284	Vps13c	vacuolar protein sorting 13C [Source:MGI Symbol;Acc:MGI:2444207]	9	1.69694	0.00124498	0.0251094	5.56434	9.44276
ENSMUSG00000015222	Map2	microtubule-associated protein 2 [Source:MGI Symbol;Acc:MGI:97175]	1	-1.84844	0.00125417	0.0252632	21.9834	11.892
ENSMUSG00000056043	Rgs9bp	regulator of G-protein signalling 9 binding protein [Source:MGI Symbol;Acc:MGI:2384418]	7	-2.44261	0.00125727	0.0252831	43.9909	18.0072
ENSMUSG00000053773	Rdh8	retinol dehydrogenase 8 [Source:MGI Symbol;Acc:MGI:2685028]	9	-3.00484	0.00125829	0.0252831	13.6072	4.51802
ENSMUSG00000028631	Kcnq4	potassium voltage-gated channel, subfamily Q, member 4 [Source:MGI Symbol;Acc:MGI:1926803]	4	2.71908	0.0012659	0.0254045	0.658192	1.79032
ENSMUSG00000028480	Glipr2	GLI pathogenesis-related 2 [Source:MGI Symbol;Acc:MGI:1917770]	4	2.63152	0.00127622	0.0255798	1.72025	4.54227
ENSMUSG00000091387	Gcnt4	glucosaminyl (N-acetyl) transferase 4, core 2 (beta-1,6-N-acetylglucosaminyltransferase) [Source:MGI Symbol;Acc:MGI:2684919]	13	-3.32134	0.00128004	0.0256247	9.54923	2.87404
ENSMUSG00000034613	Ppm1h	protein phosphatase 1H (PP2C domain containing) [Source:MGI Symbol;Acc:MGI:2442087]	10	1.62163	0.00128451	0.0256822	8.20296	13.3024
ENSMUSG00000055172	C1ra	complement component 1, r subcomponent A [Source:MGI Symbol;Acc:MGI:1355313]	6	2.30352	0.00129126	0.0257659	1.64344	3.79859
ENSMUSG00000025189	Cnnm1	cyclin M1 [Source:MGI Symbol;Acc:MGI:1891366]	19	-2.32774	0.00129329	0.0257659	3.20684	1.37559
ENSMUSG00000051652	Lrrc3	leucine rich repeat containing 3 [Source:MGI Symbol;Acc:MGI:2447899]	10	3.48079	0.00129348	0.0257659	0.426111	1.49265
ENSMUSG00000020173	Cobl	cordon-bleu WH2 repeat [Source:MGI Symbol;Acc:MGI:105056]	11	2.28838	0.00130277	0.0259095	4.3358	9.93085
ENSMUSG00000038481	Cdk19	cyclin-dependent kinase 19 [Source:MGI Symbol;Acc:MGI:1925584]	10	-1.80208	0.00130392	0.0259095	11.3116	6.27616
ENSMUSG00000024998	Plce1	phospholipase C, epsilon 1 [Source:MGI Symbol;Acc:MGI:1921305]	19	1.64553	0.00130661	0.0259095	4.72766	7.78049
ENSMUSG00000031519	Asb5	ankyrin repeat and SOCs box-containing 5 [Source:MGI Symbol;Acc:MGI:1923544]	8	-4.15545	0.0013071	0.0259095	6.01708	1.4487
ENSMUSG00000052062	Pard3b	par-3 family cell polarity regulator beta [Source:MGI Symbol;Acc:MGI:1919301]	1	1.74473	0.00131737	0.0260811	5.41118	9.43868
ENSMUSG00000044976	Wdr72	WD repeat domain 72 [Source:MGI Symbol;Acc:MGI:3583957]	9	10.821	0.00134087	0.0265138	0.0339254	0.394208
ENSMUSG00000039546	Ajap1	adherens junction associated protein 1 [Source:MGI Symbol;Acc:MGI:2685419]	4	4.69573	0.00134852	0.0266325	1.28737	6.08546
ENSMUSG00000025921	Rdh10	retinol dehydrogenase 10 (all-trans) [Source:MGI Symbol;Acc:MGI:1924238]	1	1.81752	0.00135396	0.0266695	11.9872	21.7886
ENSMUSG00000010609	Psen2	presenilin 2 [Source:MGI Symbol;Acc:MGI:109284]	1	1.89034	0.00135432	0.0266695	2.76995	5.23818
ENSMUSG00000027674	Pex5l	peroxisomal biogenesis factor 5-like [Source:MGI Symbol;Acc:MGI:1916672]	3	-1.92152	0.00135535	0.0266695	34.5949	18.0032
ENSMUSG00000044288	Cnr1	cannabinoid receptor 1 (brain) [Source:MGI Symbol;Acc:MGI:104615]	4	-2.97195	0.00138238	0.0271683	0.937077	0.315006
ENSMUSG00000105701	Gm42587	predicted gene 42587 [Source:MGI Symbol;Acc:MGI:5662724]	3	5.93788	0.0013859	0.0272043	0.151501	0.942875
ENSMUSG00000042367	Gjb3	gap junction protein, beta 3 [Source:MGI Symbol;Acc:MGI:95721]	4	-7.06206	0.00139358	0.0273069	4.36875	0.618946
ENSMUSG00000050875	Minar2	membrane integral NOTCH2 associated receptor 2 [Source:MGI Symbol;Acc:MGI:2442934]	18	2.39631	0.00139542	0.0273069	1.44087	3.46182
ENSMUSG00000058831	Opn1sw	opsin 1 (cone pigments), short-wave-sensitive (color blindness, tritan) [Source:MGI Symbol;Acc:MGI:99438]	6	-3.64791	0.00139619	0.0273069	38.0523	10.4226
ENSMUSG00000086175	Gm15802	predicted gene 15802 [Source:MGI Symbol;Acc:MGI:3801799]	16	-4.05512	0.00140399	0.0274263	2.24244	0.538838
ENSMUSG00000029298	Gbp9	guanylate-binding protein 9 [Source:MGI Symbol;Acc:MGI:3605620]	5	2.7852	0.00140573	0.0274271	0.528541	1.4761
ENSMUSG00000027829	Ccnl1	cyclin L1 [Source:MGI Symbol;Acc:MGI:1922664]	3	1.7224	0.00141045	0.0274859	36.3063	62.5395
ENSMUSG00000030400	Ercc2	excision repair cross-complementing rodent repair deficiency, complementation group 2 [Source:MGI Symbol;Acc:MGI:95413]	7	-1.85385	0.001414	0.027522	10.6543	5.7454
ENSMUSG00000041075	Fzd7	frizzled class receptor 7 [Source:MGI Symbol;Acc:MGI:108570]	1	2.1734	0.00141738	0.0275545	5.56146	12.0846
ENSMUSG00000003541	Ier3	immediate early response 3 [Source:MGI Symbol;Acc:MGI:104814]	17	2.34213	0.00142378	0.0276457	24.6083	57.6902
ENSMUSG00000030861	Acadsb	acyl-Coenzyme A dehydrogenase, short/branched chain [Source:MGI Symbol;Acc:MGI:1914135]	7	1.64678	0.00142638	0.0276629	8.09901	13.3358
ENSMUSG00000012428	Steap4	STEAP family member 4 [Source:MGI Symbol;Acc:MGI:1923560]	5	4.85996	0.001441	0.0279129	2.18829	10.6582
ENSMUSG00000031070	Mrgprf	MAS-related GPR, member F [Source:MGI Symbol;Acc:MGI:2384823]	7	5.12005	0.00144534	0.0279634	0.81517	4.18471
ENSMUSG00000035513	Ntng2	netrin G2 [Source:MGI Symbol;Acc:MGI:2159341]	2	-2.09085	0.0014497	0.0279974	16.4148	7.84752
ENSMUSG00000034227	Foxj1	forkhead box J1 [Source:MGI Symbol;Acc:MGI:1347474]	11	-3.62854	0.00145056	0.0279974	2.33579	0.644489
ENSMUSG00000031586	Rbpms	RNA binding protein gene with multiple splicing [Source:MGI Symbol;Acc:MGI:1334446]	8	2.65331	0.00145341	0.028019	1.40835	3.74819
ENSMUSG00000054619	Mettl7a1	methyltransferase like 7A1 [Source:MGI Symbol;Acc:MGI:1916523]	15	2.36227	0.00145737	0.0280618	1.51255	3.57652
ENSMUSG00000032733	Snx33	sorting nexin 33 [Source:MGI Symbol;Acc:MGI:2443239]	9	1.98099	0.00146462	0.0281677	2.24338	4.44444
ENSMUSG00000026934	Lhx3	LIM homeobox protein 3 [Source:MGI Symbol;Acc:MGI:102673]	2	-3.90815	0.00147727	0.0283486	1.59456	0.406661
ENSMUSG00000021384	Susd3	sushi domain containing 3 [Source:MGI Symbol;Acc:MGI:1913579]	13	-2.41171	0.00147753	0.0283486	16.0398	6.64269
ENSMUSG00000033450	Tagap	T cell activation Rho GTPase activating protein [Source:MGI Symbol;Acc:MGI:3615484]	17	9.17792	0.00149126	0.028578	0.0641328	0.643675
ENSMUSG00000033949	Trim36	tripartite motif-containing 36 [Source:MGI Symbol;Acc:MGI:106264]	18	-2.8754	0.00150873	0.0288786	2.3277	0.807172
ENSMUSG00000112307	Gm48751	predicted gene, 48751 [Source:MGI Symbol;Acc:MGI:6098427]	10	2.38335	0.00151374	0.0289401	1.48209	3.53638
ENSMUSG00000039519	Cyp7b1	cytochrome P450, family 7, subfamily b, polypeptide 1 [Source:MGI Symbol;Acc:MGI:104978]	3	3.51084	0.00151822	0.0289915	0.602368	2.1334
ENSMUSG00000025314	Ptprj	protein tyrosine phosphatase, receptor type, J [Source:MGI Symbol;Acc:MGI:104574]	2	1.8362	0.00152361	0.0290598	7.17335	13.1683
ENSMUSG00000020014	Cfap54	cilia and flagella associated protein 54 [Source:MGI Symbol;Acc:MGI:1922208]	10	3.59279	0.00152539	0.0290598	0.936085	3.37036
ENSMUSG00000050447	Lypd6	LY6/PLAUR domain containing 6 [Source:MGI Symbol;Acc:MGI:2443848]	2	2.15171	0.00153474	0.0292034	4.03978	8.68978
ENSMUSG00000058966	Tlcd3b	TLC domain containing 3B [Source:MGI Symbol;Acc:MGI:1916202]	7	-2.26874	0.00154046	0.0292778	64.0619	28.2335
ENSMUSG00000025900	Rp1	retinitis pigmentosa 1 (human) [Source:MGI Symbol;Acc:MGI:1341105]	1	-2.45642	0.00154674	0.0293626	76.7351	31.237
ENSMUSG00000051950	B3glct	beta-3-glucosyltransferase [Source:MGI Symbol;Acc:MGI:2685903]	5	1.91634	0.00156126	0.0296035	4.15475	7.95791
ENSMUSG00000022219	Cideb	cell death-inducing DNA fragmentation factor, alpha subunit-like effector B [Source:MGI Symbol;Acc:MGI:1270844]	14	7.7496	0.00156413	0.0296231	0.218938	1.77782
ENSMUSG00000032899	Styk1	serine/threonine/tyrosine kinase 1 [Source:MGI Symbol;Acc:MGI:2141396]	6	5.3261	0.00157339	0.0297635	0.0500053	0.282871
ENSMUSG00000102948	Gm6101	predicted gene 6101 [Source:MGI Symbol;Acc:MGI:3644986]	1	-4.94569	0.00157771	0.0297936	1.04366	0.204698
ENSMUSG00000020848	Doc2b	double C2, beta [Source:MGI Symbol;Acc:MGI:1100497]	11	-2.47906	0.00158064	0.0297936	11.6109	4.67955
ENSMUSG00000042942	Greb1l	growth regulation by estrogen in breast cancer-like [Source:MGI Symbol;Acc:MGI:3576497]	18	1.90692	0.00158121	0.0297936	1.30906	2.4959
ENSMUSG00000074634	Tmem267	transmembrane protein 267 [Source:MGI Symbol;Acc:MGI:3648543]	13	-4.27201	0.00158235	0.0297936	1.21837	0.284787
ENSMUSG00000107929	4930595L18Rik	RIKEN cDNA 4930595L18 gene [Source:MGI Symbol;Acc:MGI:1925309]	6	-4.90657	0.00160725	0.0301941	5.47122	1.08125
ENSMUSG00000027398	Il1b	interleukin 1 beta [Source:MGI Symbol;Acc:MGI:96543]	2	2.87357	0.00160736	0.0301941	1.04329	3.01263
ENSMUSG00000001247	Lsr	lipolysis stimulated lipoprotein receptor [Source:MGI Symbol;Acc:MGI:1927471]	7	2.15325	0.00161179	0.0302421	1.91497	4.12102
ENSMUSG00000090071	Cdk5r2	cyclin-dependent kinase 5, regulatory subunit 2 (p39) [Source:MGI Symbol;Acc:MGI:1330828]	1	-2.62924	0.00162233	0.0304045	20.9728	7.97067
ENSMUSG00000017561	Crlf3	cytokine receptor-like factor 3 [Source:MGI Symbol;Acc:MGI:1860086]	11	-2.17143	0.00168148	0.0314543	9.02243	4.15223
ENSMUSG00000028525	Pde4b	phosphodiesterase 4B, cAMP specific [Source:MGI Symbol;Acc:MGI:99557]	4	2.25316	0.00168224	0.0314543	5.03504	11.3507
ENSMUSG00000105431	Gm42640	predicted gene 42640 [Source:MGI Symbol;Acc:MGI:5662777]	5	3.36012	0.001695	0.0316356	0.512271	1.7503
ENSMUSG00000048707	Tprn	taperin [Source:MGI Symbol;Acc:MGI:2139535]	2	2.20242	0.00169585	0.0316356	1.49794	3.30612
ENSMUSG00000117628	Gm50012	predicted gene, 50012 [Source:MGI Symbol;Acc:MGI:6275301]	17	1.88055	0.00170703	0.0318075	4.8092	9.0347
ENSMUSG00000030401	Rtn2	reticulon 2 (Z-band associated protein) [Source:MGI Symbol;Acc:MGI:107612]	7	-2.88839	0.0017337	0.0322672	3.60472	1.24483
ENSMUSG00000002111	Spi1	spleen focus forming virus (SFFV) proviral integration oncogene [Source:MGI Symbol;Acc:MGI:98282]	2	4.95841	0.00174802	0.0324963	0.129108	0.651953
ENSMUSG00000001419	Mef2d	myocyte enhancer factor 2D [Source:MGI Symbol;Acc:MGI:99533]	3	-1.96717	0.00175093	0.032513	52.1844	26.5263
ENSMUSG00000059434	Gckr	glucokinase regulatory protein [Source:MGI Symbol;Acc:MGI:1096345]	5	2.56782	0.00175627	0.0325748	4.94224	12.7053
ENSMUSG00000064193	Gm4735	predicted gene 4735 [Source:MGI Symbol;Acc:MGI:3645521]	2	-10.6166	0.00176977	0.0327772	16.1092	1.50949
ENSMUSG00000025909	Sntg1	syntrophin, gamma 1 [Source:MGI Symbol;Acc:MGI:1918346]	1	2.31784	0.00177125	0.0327772	0.648383	1.50864
ENSMUSG00000004902	Slc25a18	solute carrier family 25 (mitochondrial carrier), member 18 [Source:MGI Symbol;Acc:MGI:1919053]	6	-3.57135	0.00177538	0.0328161	3.00692	0.835605
ENSMUSG00000062031	Pgghg	protein glucosylgalactosylhydroxylysine glucosidase [Source:MGI Symbol;Acc:MGI:2444047]	7	2.12037	0.00177821	0.0328308	2.95669	6.25971
ENSMUSG00000025185	Loxl4	lysyl oxidase-like 4 [Source:MGI Symbol;Acc:MGI:1914823]	19	-4.3337	0.00179006	0.0330119	1.31468	0.298747
ENSMUSG00000026170	Cyp27a1	cytochrome P450, family 27, subfamily a, polypeptide 1 [Source:MGI Symbol;Acc:MGI:88594]	1	3.17364	0.00179257	0.0330205	0.466204	1.47573
ENSMUSG00000045777	Ifitm10	interferon induced transmembrane protein 10 [Source:MGI Symbol;Acc:MGI:2444776]	7	3.09903	0.00179526	0.0330323	0.583071	1.81176
ENSMUSG00000073565	Prr16	proline rich 16 [Source:MGI Symbol;Acc:MGI:1918623]	18	-4.89619	0.00179863	0.0330567	0.436587	0.0885757
ENSMUSG00000074365	Crxos	cone-rod homeobox, opposite strand [Source:MGI Symbol;Acc:MGI:2451355]	7	-3.47001	0.0018029	0.0330739	3.0529	0.873405
ENSMUSG00000054072	Iigp1	interferon inducible GTPase 1 [Source:MGI Symbol;Acc:MGI:1926259]	18	4.16549	0.00180366	0.0330739	0.0872102	0.364437
ENSMUSG00000035828	Pim3	proviral integration site 3 [Source:MGI Symbol;Acc:MGI:1355297]	15	1.79483	0.00180906	0.0331101	21.0921	37.8719
ENSMUSG00000037447	Arid5a	AT rich interactive domain 5A (MRF1-like) [Source:MGI Symbol;Acc:MGI:2443039]	1	1.89773	0.00181177	0.0331101	3.54087	6.72146
ENSMUSG00000000693	Loxl3	lysyl oxidase-like 3 [Source:MGI Symbol;Acc:MGI:1337004]	6	2.26203	0.00181187	0.0331101	1.1096	2.50942
ENSMUSG00000024737	Slc15a3	solute carrier family 15, member 3 [Source:MGI Symbol;Acc:MGI:1929691]	19	4.69013	0.00181383	0.0331101	0.171099	0.800585
ENSMUSG00000028015	Ctso	cathepsin O [Source:MGI Symbol;Acc:MGI:2139628]	3	1.89632	0.00181864	0.0331604	2.31197	4.3769
ENSMUSG00000114414	A930014D07Rik	RIKEN cDNA A930014D07 gene [Source:MGI Symbol;Acc:MGI:1925197]	13	-4.86137	0.00182247	0.0331928	2.61404	0.53289
ENSMUSG00000007570	Fance	Fanconi anemia, complementation group E [Source:MGI Symbol;Acc:MGI:1920025]	17	-2.14155	0.0018253	0.0332069	7.36303	3.43322
ENSMUSG00000041119	Pde9a	phosphodiesterase 9A [Source:MGI Symbol;Acc:MGI:1277179]	17	2.34388	0.00183763	0.0333936	2.36662	5.56547
ENSMUSG00000042225	Ammecr1	Alport syndrome, mental retardation, midface hypoplasia and elliptocytosis chromosomal region gene 1 [Source:MGI Symbol;Acc:MGI:1860206]	X	-2.0356	0.00184586	0.0335054	4.61412	2.26392
ENSMUSG00000050721	Plekho2	pleckstrin homology domain containing, family O member 2 [Source:MGI Symbol;Acc:MGI:2143132]	9	1.81328	0.00185904	0.0337068	3.77221	6.84437
ENSMUSG00000051335	Gfod1	glucose-fructose oxidoreductase domain containing 1 [Source:MGI Symbol;Acc:MGI:2145304]	13	-2.04028	0.0018713	0.0338738	3.91679	1.91786
ENSMUSG00000022971	Ifnar2	interferon (alpha and beta) receptor 2 [Source:MGI Symbol;Acc:MGI:1098243]	16	2.20422	0.00187244	0.0338738	1.91528	4.21152
ENSMUSG00000022707	Gbe1	glucan (1,4-alpha-), branching enzyme 1 [Source:MGI Symbol;Acc:MGI:1921435]	16	1.68543	0.00187682	0.0339151	4.2565	7.1799
ENSMUSG00000021922	Itih4	inter alpha-trypsin inhibitor, heavy chain 4 [Source:MGI Symbol;Acc:MGI:109536]	14	-5.20887	0.0018941	0.0341595	0.59703	0.109954
ENSMUSG00000036880	Acaa2	acetyl-Coenzyme A acyltransferase 2 (mitochondrial 3-oxoacyl-Coenzyme A thiolase) [Source:MGI Symbol;Acc:MGI:1098623]	18	1.94372	0.00189458	0.0341595	7.48738	14.5834
ENSMUSG00000029420	Rimbp2	RIMS binding protein 2 [Source:MGI Symbol;Acc:MGI:2443235]	5	2.49646	0.00189866	0.034195	2.15843	5.39766
ENSMUSG00000080316	Spaca6	sperm acrosome associated 6 [Source:MGI Symbol;Acc:MGI:1922452]	17	1.76909	0.00190664	0.0343004	11.5068	20.3537
ENSMUSG00000062157	Ifnlr1	interferon lambda receptor 1 [Source:MGI Symbol;Acc:MGI:2429859]	4	6.48434	0.00190976	0.0343068	0.182791	1.21355
ENSMUSG00000045954	Cavin2	caveolae associated 2 [Source:MGI Symbol;Acc:MGI:99513]	1	1.89031	0.00191137	0.0343068	11.5281	21.7848
ENSMUSG00000029413	Naaa	N-acylethanolamine acid amidase [Source:MGI Symbol;Acc:MGI:1914361]	5	1.75984	0.00191482	0.0343068	5.94852	10.4771
ENSMUSG00000035456	Prdm8	PR domain containing 8 [Source:MGI Symbol;Acc:MGI:1924880]	5	-2.54053	0.00191549	0.0343068	10.42	4.09934
ENSMUSG00000006519	Cyba	cytochrome b-245, alpha polypeptide [Source:MGI Symbol;Acc:MGI:1316658]	8	3.85193	0.00192968	0.0345227	1.76354	6.87698
ENSMUSG00000103916	Gm38071	predicted gene, 38071 [Source:MGI Symbol;Acc:MGI:5611299]	16	4.74992	0.00193506	0.0345806	0.109089	0.530635
ENSMUSG00000031996	Aplp2	amyloid beta (A4) precursor-like protein 2 [Source:MGI Symbol;Acc:MGI:88047]	9	1.68139	0.0019402	0.0346342	123.485	207.63
ENSMUSG00000050786	Ccdc126	coiled-coil domain containing 126 [Source:MGI Symbol;Acc:MGI:1889376]	6	-2.22964	0.00194613	0.0347017	28.712	12.8721
ENSMUSG00000039860	Srrm3	serine/arginine repetitive matrix 3 [Source:MGI Symbol;Acc:MGI:1920309]	5	-2.46258	0.00195491	0.0348198	9.86129	4.00209
ENSMUSG00000115918	A930001M01Rik	RIKEN cDNA A930001M01 gene [Source:MGI Symbol;Acc:MGI:1925191]	15	-3.44104	0.00196724	0.0350009	2.95556	0.855073
ENSMUSG00000020538	Srebf1	sterol regulatory element binding transcription factor 1 [Source:MGI Symbol;Acc:MGI:107606]	11	1.77385	0.00198192	0.0351997	39.9977	70.9489
ENSMUSG00000001665	Gstt3	glutathione S-transferase, theta 3 [Source:MGI Symbol;Acc:MGI:2143526]	10	5.62623	0.00198278	0.0351997	0.0847943	0.502442
ENSMUSG00000100768	Gm29055	predicted gene 29055 [Source:MGI Symbol;Acc:MGI:5579761]	1	-4.2816	0.00199066	0.0353008	1.66897	0.385569
ENSMUSG00000003411	Rab3b	RAB3B, member RAS oncogene family [Source:MGI Symbol;Acc:MGI:1917158]	4	-2.474	0.00200281	0.0354775	7.08566	2.8622
ENSMUSG00000025475	Adgra1	adhesion G protein-coupled receptor A1 [Source:MGI Symbol;Acc:MGI:1277167]	7	-1.78445	0.00200673	0.0355079	3.85292	2.15784
ENSMUSG00000030246	Ldhb	lactate dehydrogenase B [Source:MGI Symbol;Acc:MGI:96763]	6	2.03278	0.00201504	0.0355875	28.8132	58.621
ENSMUSG00000050587	Lrrc4c	leucine rich repeat containing 4C [Source:MGI Symbol;Acc:MGI:2442636]	2	2.42448	0.00201563	0.0355875	2.35933	5.73567
ENSMUSG00000108601	Gm44645	predicted gene 44645 [Source:MGI Symbol;Acc:MGI:5753221]	7	4.56439	0.00204747	0.0360955	0.17429	0.803937
ENSMUSG00000031119	Gpc4	glypican 4 [Source:MGI Symbol;Acc:MGI:104902]	X	1.8109	0.00204887	0.0360955	21.7654	39.4015
ENSMUSG00000078771	Evi2a	ecotropic viral integration site 2a [Source:MGI Symbol;Acc:MGI:95458]	11	4.86975	0.00205872	0.0362294	0.110541	0.548069
ENSMUSG00000059895	Ptp4a3	protein tyrosine phosphatase 4a3 [Source:MGI Symbol;Acc:MGI:1277098]	15	-2.53266	0.00207249	0.0363668	22.3574	8.82662
ENSMUSG00000086600	C030005K06Rik	RIKEN cDNA C030005K06 gene [Source:MGI Symbol;Acc:MGI:1925945]	18	4.31564	0.00207312	0.0363668	0.286264	1.24815
ENSMUSG00000005871	Apc	APC, WNT signaling pathway regulator [Source:MGI Symbol;Acc:MGI:88039]	18	-1.97281	0.00207328	0.0363668	42.0993	21.3394
ENSMUSG00000057193	Slc44a2	solute carrier family 44, member 2 [Source:MGI Symbol;Acc:MGI:1915932]	9	1.78506	0.00207808	0.0364115	1.27738	2.28172
ENSMUSG00000092867	Mir3058	microRNA 3058 [Source:MGI Symbol;Acc:MGI:4834226]	10	3.60158	0.00210737	0.0368847	8.03307	29.3686
ENSMUSG00000042613	Pbxip1	pre B cell leukemia transcription factor interacting protein 1 [Source:MGI Symbol;Acc:MGI:2441670]	3	1.68132	0.00212646	0.0371785	15.8081	26.5717
ENSMUSG00000026482	Rgl1	ral guanine nucleotide dissociation stimulator,-like 1 [Source:MGI Symbol;Acc:MGI:107484]	1	1.58414	0.00214392	0.0374433	7.5972	12.0339
ENSMUSG00000032191	Bcl2l10	Bcl2-like 10 [Source:MGI Symbol;Acc:MGI:1330841]	9	-3.83089	0.00214675	0.0374522	2.31206	0.594718
ENSMUSG00000032349	Elovl5	ELOVL family member 5, elongation of long chain fatty acids (yeast) [Source:MGI Symbol;Acc:MGI:1916051]	9	1.73935	0.00215105	0.0374868	4.15422	7.23554
ENSMUSG00000026365	Cfh	complement component factor h [Source:MGI Symbol;Acc:MGI:88385]	1	2.37133	0.00215686	0.0375474	0.846708	2.01043
ENSMUSG00000042406	Atf4	activating transcription factor 4 [Source:MGI Symbol;Acc:MGI:88096]	15	-1.78897	0.00216733	0.0376892	108.421	60.6059
ENSMUSG00000048865	Arhgap30	Rho GTPase activating protein 30 [Source:MGI Symbol;Acc:MGI:2684948]	1	7.39002	0.00219502	0.0381297	0.0424974	0.324626
ENSMUSG00000053310	Nrgn	neurogranin [Source:MGI Symbol;Acc:MGI:1927184]	9	2.85348	0.00221074	0.0383357	1.56401	4.49159
ENSMUSG00000062006	Rpl34	ribosomal protein L34 [Source:MGI Symbol;Acc:MGI:1915686]	3	-2.06253	0.00221163	0.0383357	37.3969	18.1312
ENSMUSG00000004151	Etv1	ets variant 1 [Source:MGI Symbol;Acc:MGI:99254]	12	1.99055	0.00221689	0.0383857	0.714258	1.42226
ENSMUSG00000030265	Kras	Kirsten rat sarcoma viral oncogene homolog [Source:MGI Symbol;Acc:MGI:96680]	6	-1.60938	0.00222354	0.0384596	14.6622	9.10884
ENSMUSG00000073158	9030624G23Rik	RIKEN cDNA 9030624G23 gene [Source:MGI Symbol;Acc:MGI:1914058]	12	-2.3513	0.00223392	0.0385978	3.40206	1.44769
ENSMUSG00000029410	Ppef2	protein phosphatase, EF hand calcium-binding domain 2 [Source:MGI Symbol;Acc:MGI:1342304]	5	-2.59302	0.00225408	0.0389045	27.178	10.4779
ENSMUSG00000054074	Skida1	SKI/DACH domain containing 1 [Source:MGI Symbol;Acc:MGI:1919918]	2	-2.31777	0.0022597	0.03896	5.10479	2.20022
ENSMUSG00000018920	Cxcl16	chemokine (C-X-C motif) ligand 16 [Source:MGI Symbol;Acc:MGI:1932682]	11	2.66641	0.00226425	0.0389744	1.58292	4.23942
ENSMUSG00000046711	Hmga1	high mobility group AT-hook 1 [Source:MGI Symbol;Acc:MGI:96160]	17	-2.24342	0.00226537	0.0389744	60.7615	27.0886
ENSMUSG00000003484	Cyp4f18	cytochrome P450, family 4, subfamily f, polypeptide 18 [Source:MGI Symbol;Acc:MGI:1919304]	8	6.13301	0.00227186	0.0390446	0.101399	0.648334
ENSMUSG00000037747	Phyhipl	phytanoyl-CoA hydroxylase interacting protein-like [Source:MGI Symbol;Acc:MGI:1918161]	10	-2.8868	0.00228011	0.0391448	3.63114	1.2562
ENSMUSG00000048988	Elfn1	leucine rich repeat and fibronectin type III, extracellular 1 [Source:MGI Symbol;Acc:MGI:2442479]	5	-1.61791	0.00234473	0.0402114	19.4232	12.0052
ENSMUSG00000108214	Gm43982	predicted gene, 43982 [Source:MGI Symbol;Acc:MGI:5690374]	6	1.96315	0.00235183	0.0402904	6.77463	13.2898
ENSMUSG00000052942	Glis3	GLIS family zinc finger 3 [Source:MGI Symbol;Acc:MGI:2444289]	19	2.22375	0.00237618	0.0406253	1.94373	4.32712
ENSMUSG00000048285	Frmd6	FERM domain containing 6 [Source:MGI Symbol;Acc:MGI:2442579]	12	-2.46192	0.00237641	0.0406253	45.99	18.6805
ENSMUSG00000059864	Olfr1393	olfactory receptor 1393 [Source:MGI Symbol;Acc:MGI:3031227]	11	-3.48219	0.00238108	0.0406621	0.912664	0.261415
ENSMUSG00000026596	Abl2	v-abl Abelson murine leukemia viral oncogene 2 (arg, Abelson-related gene) [Source:MGI Symbol;Acc:MGI:87860]	1	-2.03954	0.00239851	0.0409166	14.3847	7.05288
ENSMUSG00000026600	Soat1	sterol O-acyltransferase 1 [Source:MGI Symbol;Acc:MGI:104665]	1	1.65974	0.00241825	0.0411741	1.91523	3.18115
ENSMUSG00000028277	Ube2j1	ubiquitin-conjugating enzyme E2J 1 [Source:MGI Symbol;Acc:MGI:1926245]	4	-1.70638	0.00241871	0.0411741	30.767	18.0277
ENSMUSG00000033955	Tnks1bp1	tankyrase 1 binding protein 1 [Source:MGI Symbol;Acc:MGI:2446193]	2	1.62597	0.00242558	0.0412476	15.6036	25.3749
ENSMUSG00000031450	Grk1	G protein-coupled receptor kinase 1 [Source:MGI Symbol;Acc:MGI:1345146]	8	-2.34722	0.00243903	0.0414105	85.8117	36.5568
ENSMUSG00000024776	Stambpl1	STAM binding protein like 1 [Source:MGI Symbol;Acc:MGI:1923880]	19	2.86476	0.00244287	0.0414105	0.305873	0.884229
ENSMUSG00000025017	Pik3ap1	phosphoinositide-3-kinase adaptor protein 1 [Source:MGI Symbol;Acc:MGI:1933177]	19	2.16443	0.00244419	0.0414105	0.935391	2.02945
ENSMUSG00000049225	Pdp1	pyruvate dehyrogenase phosphatase catalytic subunit 1 [Source:MGI Symbol;Acc:MGI:2685870]	4	-2.43288	0.00244541	0.0414105	6.95018	2.85704
ENSMUSG00000022371	Col14a1	collagen, type XIV, alpha 1 [Source:MGI Symbol;Acc:MGI:1341272]	15	4.74219	0.00246022	0.0416176	0.069737	0.339104
ENSMUSG00000004668	Abca13	ATP-binding cassette, sub-family A (ABC1), member 13 [Source:MGI Symbol;Acc:MGI:2388707]	11	3.89795	0.00246303	0.0416217	0.210399	0.822137
ENSMUSG00000064080	Fbln2	fibulin 2 [Source:MGI Symbol;Acc:MGI:95488]	6	2.92459	0.00249692	0.0421501	0.573949	1.69021
ENSMUSG00000072875	Gpr27	G protein-coupled receptor 27 [Source:MGI Symbol;Acc:MGI:1202299]	6	2.44071	0.00249961	0.0421516	1.38727	3.38122
ENSMUSG00000026944	Abca2	ATP-binding cassette, sub-family A (ABC1), member 2 [Source:MGI Symbol;Acc:MGI:99606]	2	1.67036	0.0025123	0.0423084	25.7082	42.9415
ENSMUSG00000083798	Gm14584	predicted gene 14584 [Source:MGI Symbol;Acc:MGI:3705780]	X	-16.591	0.00251415	0.0423084	15.5732	0.925852
ENSMUSG00000025584	Pde8a	phosphodiesterase 8A [Source:MGI Symbol;Acc:MGI:1277116]	7	-2.62135	0.00252594	0.0424626	11.4346	4.36024
ENSMUSG00000040312	Cchcr1	coiled-coil alpha-helical rod protein 1 [Source:MGI Symbol;Acc:MGI:2385321]	17	1.77683	0.00253389	0.0425519	2.3088	4.10753
ENSMUSG00000108067	Gm43953	predicted gene, 43953 [Source:MGI Symbol;Acc:MGI:5690345]	6	6.15252	0.00253778	0.0425731	0.140449	0.885337
ENSMUSG00000070327	Rnf213	ring finger protein 213 [Source:MGI Symbol;Acc:MGI:1289196]	11	1.73233	0.002543	0.0425739	5.14001	8.90424
ENSMUSG00000022575	Gsdmd	gasdermin D [Source:MGI Symbol;Acc:MGI:1916396]	15	4.30194	0.00254356	0.0425739	0.162232	0.728298
ENSMUSG00000014778	Fhod1	formin homology 2 domain containing 1 [Source:MGI Symbol;Acc:MGI:2679008]	8	1.65999	0.00254574	0.0425739	4.30013	7.14311
ENSMUSG00000052911	Lamb2	laminin, beta 2 [Source:MGI Symbol;Acc:MGI:99916]	9	1.83815	0.00257929	0.0430904	23.6178	43.4076
ENSMUSG00000032131	Abcg4	ATP binding cassette subfamily G member 4 [Source:MGI Symbol;Acc:MGI:1890594]	9	-2.1035	0.00259699	0.0433413	6.85749	3.25786
ENSMUSG00000086839	Gm11973	predicted gene 11973 [Source:MGI Symbol;Acc:MGI:3650058]	11	-3.74409	0.00261073	0.0435256	1.87307	0.495048
ENSMUSG00000072621	Slfn10-ps	schlafen 10, pseudogene [Source:MGI Symbol;Acc:MGI:3512288]	11	6.13589	0.00261798	0.0436015	0.151336	0.93525
ENSMUSG00000020890	Gucy2e	guanylate cyclase 2e [Source:MGI Symbol;Acc:MGI:105123]	11	-2.34093	0.00262316	0.0436161	24.755	10.5732
ENSMUSG00000029864	Gstk1	glutathione S-transferase kappa 1 [Source:MGI Symbol;Acc:MGI:1923513]	6	2.43637	0.00262426	0.0436161	2.63764	6.44252
ENSMUSG00000038174	Fam126b	family with sequence similarity 126, member B [Source:MGI Symbol;Acc:MGI:1098784]	1	-1.77365	0.00264205	0.0438668	3.43335	1.93559
ENSMUSG00000028794	A3galt2	alpha 1,3-galactosyltransferase 2 (isoglobotriaosylceramide synthase) [Source:MGI Symbol;Acc:MGI:2685279]	4	-2.28711	0.00264696	0.0439031	2.0013	0.87359
ENSMUSG00000016386	Mpped2	metallophosphoesterase domain containing 2 [Source:MGI Symbol;Acc:MGI:1924265]	2	-2.52343	0.0026568	0.0440212	2.6161	1.03043
ENSMUSG00000002058	Unc119	unc-119 lipid binding chaperone [Source:MGI Symbol;Acc:MGI:1328357]	11	-2.13965	0.0026631	0.0440803	104.701	48.9292
ENSMUSG00000038545	Cul7	cullin 7 [Source:MGI Symbol;Acc:MGI:1913765]	17	1.67818	0.00272543	0.0450658	6.33952	10.6374
ENSMUSG00000049288	Lix1l	Lix1-like [Source:MGI Symbol;Acc:MGI:3036267]	3	1.6914	0.00273053	0.0450805	6.12612	10.3597
ENSMUSG00000036918	Ttc7	tetratricopeptide repeat domain 7 [Source:MGI Symbol;Acc:MGI:1920999]	17	1.78039	0.0027319	0.0450805	2.59421	4.61525
ENSMUSG00000118671	EPPK1	epiplakin 1	15	2.08356	0.0027381	0.0451368	0.421106	0.880194
ENSMUSG00000019256	Ahr	aryl-hydrocarbon receptor [Source:MGI Symbol;Acc:MGI:105043]	12	-2.81924	0.00276909	0.045601	15.4535	5.47943
ENSMUSG00000051910	Sox6	SRY (sex determining region Y)-box 6 [Source:MGI Symbol;Acc:MGI:98368]	7	1.7936	0.0027751	0.0456534	1.00376	1.80263
ENSMUSG00000087380	2210408F21Rik	RIKEN cDNA 2210408F21 gene [Source:MGI Symbol;Acc:MGI:1920902]	6	2.94514	0.00277976	0.0456837	0.633967	1.8854
ENSMUSG00000018427	Ypel2	yippee like 2 [Source:MGI Symbol;Acc:MGI:1925114]	11	-1.66045	0.00281332	0.0461882	37.8443	22.7916
ENSMUSG00000053615	Gm9913	predicted gene 9913 [Source:MGI Symbol;Acc:MGI:3642395]	2	4.38009	0.0028292	0.0464018	0.168378	0.76646
ENSMUSG00000020120	Plek	pleckstrin [Source:MGI Symbol;Acc:MGI:1860485]	11	2.15668	0.00284979	0.046692	1.72963	3.7453
ENSMUSG00000020701	Tmem132e	transmembrane protein 132E [Source:MGI Symbol;Acc:MGI:2685490]	11	2.37309	0.00286279	0.0468575	1.15763	2.75842
ENSMUSG00000058152	Chsy3	chondroitin sulfate synthase 3 [Source:MGI Symbol;Acc:MGI:1926173]	18	2.40183	0.00286711	0.0468807	0.688277	1.65089
ENSMUSG00000061288	Taok3	TAO kinase 3 [Source:MGI Symbol;Acc:MGI:3041177]	5	-1.9283	0.00287967	0.0470384	14.2789	7.40409
ENSMUSG00000029053	Prkcz	protein kinase C, zeta [Source:MGI Symbol;Acc:MGI:97602]	4	-2.32488	0.00288568	0.047089	6.88779	2.96063
ENSMUSG00000053040	Aph1c	aph1 homolog C, gamma secretase subunit [Source:MGI Symbol;Acc:MGI:1915568]	9	2.34516	0.00296115	0.0482719	0.482428	1.13793
ENSMUSG00000018166	Erbb3	erb-b2 receptor tyrosine kinase 3 [Source:MGI Symbol;Acc:MGI:95411]	10	4.03768	0.00297784	0.0484716	0.133857	0.537575
ENSMUSG00000026853	Crat	carnitine acetyltransferase [Source:MGI Symbol;Acc:MGI:109501]	2	1.74118	0.00297941	0.0484716	2.62258	4.56348
ENSMUSG00000021136	Smoc1	SPARC related modular calcium binding 1 [Source:MGI Symbol;Acc:MGI:1929878]	12	2.25937	0.00298428	0.0485021	2.15245	4.88078
ENSMUSG00000032435	Dync1li1	dynein cytoplasmic 1 light intermediate chain 1 [Source:MGI Symbol;Acc:MGI:2135610]	9	-1.57313	0.00298852	0.0485151	22.731	14.45
ENSMUSG00000028919	Arhgef19	Rho guanine nucleotide exchange factor (GEF) 19 [Source:MGI Symbol;Acc:MGI:1925912]	4	1.71311	0.00299109	0.0485151	9.73402	16.6704
ENSMUSG00000046546	Fam43a	family with sequence similarity 43, member A [Source:MGI Symbol;Acc:MGI:2676309]	16	1.81841	0.00299717	0.048565	5.35486	9.73953
ENSMUSG00000040249	Lrp1	low density lipoprotein receptor-related protein 1 [Source:MGI Symbol;Acc:MGI:96828]	10	1.77107	0.00300851	0.0486998	58.2524	103.168
ENSMUSG00000029094	Afap1	actin filament associated protein 1 [Source:MGI Symbol;Acc:MGI:1917542]	5	1.61286	0.00301677	0.0487847	6.00735	9.69078
ENSMUSG00000056055	Sag	S-antigen, retina and pineal gland (arrestin) [Source:MGI Symbol;Acc:MGI:98227]	1	-2.45832	0.00302843	0.0489243	166.466	67.7141
ENSMUSG00000087305	A430035B10Rik	RIKEN cDNA A430035B10 gene [Source:MGI Symbol;Acc:MGI:2443789]	6	-3.39437	0.00304539	0.0491251	1.23855	0.361817
ENSMUSG00000031712	Il15	interleukin 15 [Source:MGI Symbol;Acc:MGI:103014]	8	3.79811	0.00304694	0.0491251	0.178852	0.690365
ENSMUSG00000042155	Klhl23	kelch-like 23 [Source:MGI Symbol;Acc:MGI:2683536]	2	-2.30913	0.00305328	0.0491382	8.73852	3.78207
ENSMUSG00000050989	Selenon	selenoprotein N [Source:MGI Symbol;Acc:MGI:2151208]	4	1.6122	0.00305523	0.0491382	9.12001	14.7
ENSMUSG00000024087	Cyp1b1	cytochrome P450, family 1, subfamily b, polypeptide 1 [Source:MGI Symbol;Acc:MGI:88590]	17	3.26637	0.00305688	0.0491382	1.14166	3.74142
ENSMUSG00000031028	Tub	tubby bipartite transcription factor [Source:MGI Symbol;Acc:MGI:2651573]	7	-2.25248	0.00307741	0.0494191	28.1642	12.5021
ENSMUSG00000020282	Rhbdf1	rhomboid 5 homolog 1 [Source:MGI Symbol;Acc:MGI:104328]	11	1.71269	0.00308645	0.0495149	5.39545	9.23918
ENSMUSG00000038267	Slc22a23	solute carrier family 22, member 23 [Source:MGI Symbol;Acc:MGI:1920352]	13	-2.01354	0.00311214	0.0498776	10.7307	5.32984
ENSMUSG00000022790	Igsf11	immunoglobulin superfamily, member 11 [Source:MGI Symbol;Acc:MGI:2388477]	16	-2.84748	0.00311591	0.0498885	13.6096	4.77729
ENSMUSG00000027401	Tgm3	transglutaminase 3, E polypeptide [Source:MGI Symbol;Acc:MGI:98732]	2	4.1133	0.00312609	0.0499618	0.119719	0.499545
ENSMUSG00000046994	Mars2	methionine-tRNA synthetase 2 (mitochondrial) [Source:MGI Symbol;Acc:MGI:2444136]	1	-1.96551	0.00312667	0.0499618	1.05264	0.534849
ENSMUSG00000024842	Cabp4	calcium binding protein 4 [Source:MGI Symbol;Acc:MGI:1920910]	19	-2.32262	0.0031379	0.0500917	17.2701	7.4309
ENSMUSG00000041261	Car8	carbonic anhydrase 8 [Source:MGI Symbol;Acc:MGI:88253]	4	-1.74209	0.00314291	0.050122	8.52114	4.89242
ENSMUSG00000034829	Nxnl1	nucleoredoxin-like 1 [Source:MGI Symbol;Acc:MGI:1924446]	8	-2.54869	0.0031808	0.0506764	21.0707	8.26251
ENSMUSG00000021238	Aldh6a1	aldehyde dehydrogenase family 6, subfamily A1 [Source:MGI Symbol;Acc:MGI:1915077]	12	1.7053	0.0031911	0.0507904	5.09486	8.68462
ENSMUSG00002076206			6	-2.7859	0.00320875	0.051021	32.0139	11.3965
ENSMUSG00000047242	Taf9b	TATA-box binding protein associated factor 9B [Source:MGI Symbol;Acc:MGI:3039562]	X	2.49011	0.00321347	0.0510458	1.3731	3.41981
ENSMUSG00000033416	Gucd1	guanylyl cyclase domain containing 1 [Source:MGI Symbol;Acc:MGI:1916028]	10	-2.08293	0.00322208	0.0511029	4.73317	2.27002
ENSMUSG00000022475	Hdac7	histone deacetylase 7 [Source:MGI Symbol;Acc:MGI:1891835]	15	1.84526	0.00322339	0.0511029	15.9615	29.4507
ENSMUSG00000059555	Tor4a	torsin family 4, member A [Source:MGI Symbol;Acc:MGI:2442720]	2	3.08894	0.00322941	0.0511088	0.863776	2.68042
ENSMUSG00000090946	Ccdc71l	coiled-coil domain containing 71 like [Source:MGI Symbol;Acc:MGI:1919373]	12	-2.91593	0.00323009	0.0511088	14.3052	4.90536
ENSMUSG00000025515	Muc2	mucin 2 [Source:MGI Symbol;Acc:MGI:1339364]	7	-2.3227	0.00323991	0.051214	1.06825	0.45994
ENSMUSG00000034023	Fancd2	Fanconi anemia, complementation group D2 [Source:MGI Symbol;Acc:MGI:2448480]	6	2.91384	0.00326293	0.0515276	0.193577	0.567915
ENSMUSG00000022206	Npr3	natriuretic peptide receptor 3 [Source:MGI Symbol;Acc:MGI:97373]	15	2.04206	0.00331085	0.0522332	0.982792	2.00792
ENSMUSG00000036606	Plxnb2	plexin B2 [Source:MGI Symbol;Acc:MGI:2154239]	15	1.84825	0.00332026	0.0523305	42.9107	79.3073
ENSMUSG00000001027	Scn4a	sodium channel, voltage-gated, type IV, alpha [Source:MGI Symbol;Acc:MGI:98250]	11	-3.43697	0.00332596	0.0523693	1.2272	0.354849
ENSMUSG00000068758	Il3ra	interleukin 3 receptor, alpha chain [Source:MGI Symbol;Acc:MGI:96553]	14	2.63583	0.00333874	0.0525194	0.735399	1.94846
ENSMUSG00000075324	Fign	fidgetin [Source:MGI Symbol;Acc:MGI:1890647]	2	2.25671	0.00334242	0.052526	2.04434	4.61181
ENSMUSG00000002324	Rec8	REC8 meiotic recombination protein [Source:MGI Symbol;Acc:MGI:1929645]	14	-2.69939	0.00337978	0.0530615	1.60831	0.595819
ENSMUSG00000024899	Papss2	3'-phosphoadenosine 5'-phosphosulfate synthase 2 [Source:MGI Symbol;Acc:MGI:1330223]	19	2.37575	0.00338894	0.0531501	1.58447	3.77136
ENSMUSG00000086013	Gm15706	predicted gene 15706 [Source:MGI Symbol;Acc:MGI:3783146]	6	-2.04917	0.003392	0.0531501	19.9578	9.73216
ENSMUSG00000107019	Gm43682	predicted gene 43682 [Source:MGI Symbol;Acc:MGI:5663819]	5	-2.22003	0.00342134	0.0535578	3.83775	1.72201
ENSMUSG00000053559	Smagp	small cell adhesion glycoprotein [Source:MGI Symbol;Acc:MGI:2448476]	15	2.77004	0.00343784	0.053764	2.00484	5.56308
ENSMUSG00000039910	Cited2	Cbp/p300-interacting transactivator, with Glu/Asp-rich carboxy-terminal domain, 2 [Source:MGI Symbol;Acc:MGI:1306784]	10	-1.92419	0.0034527	0.0539063	58.8436	30.5815
ENSMUSG00000039005	Tlr4	toll-like receptor 4 [Source:MGI Symbol;Acc:MGI:96824]	4	2.33768	0.00345361	0.0539063	0.707499	1.64863
ENSMUSG00000021363	Mak	male germ cell-associated kinase [Source:MGI Symbol;Acc:MGI:96913]	13	-2.45071	0.00347187	0.0541391	15.4203	6.28988
ENSMUSG00000091017	Fam71a	family with sequence similarity 71, member A [Source:MGI Symbol;Acc:MGI:3588202]	1	2.1043	0.00349107	0.0543633	4.14361	8.73547
ENSMUSG00000000276	Dgke	diacylglycerol kinase, epsilon [Source:MGI Symbol;Acc:MGI:1889276]	11	-2.05761	0.00349298	0.0543633	15.298	7.43311
ENSMUSG00000033906	Zdhhc15	zinc finger, DHHC domain containing 15 [Source:MGI Symbol;Acc:MGI:1915336]	X	2.62704	0.00349859	0.0543981	0.387999	1.02739
ENSMUSG00000031824	6430548M08Rik	RIKEN cDNA 6430548M08 gene [Source:MGI Symbol;Acc:MGI:2443793]	8	-1.83645	0.00351244	0.054561	24.8687	13.5399
ENSMUSG00000026933	Camsap1	calmodulin regulated spectrin-associated protein 1 [Source:MGI Symbol;Acc:MGI:3036242]	2	-1.70062	0.00351999	0.0545715	34.1435	20.0762
ENSMUSG00000057229	Dmac2	distal membrane arm assembly complex 2 [Source:MGI Symbol;Acc:MGI:1913599]	7	-1.93844	0.00352304	0.0545715	4.40564	2.27231
ENSMUSG00000070730	Rmdn3	regulator of microtubule dynamics 3 [Source:MGI Symbol;Acc:MGI:1915059]	2	-1.72546	0.00352325	0.0545715	15.4008	8.92724
ENSMUSG00000022636	Alcam	activated leukocyte cell adhesion molecule [Source:MGI Symbol;Acc:MGI:1313266]	16	1.79927	0.00353462	0.0546952	1.48867	2.68106
ENSMUSG00000053329	Gatd3a	glutamine amidotransferase like class 1 domain containing 3A [Source:MGI Symbol;Acc:MGI:1351861]	10	1.6828	0.00353889	0.0547089	6.66267	11.2118
ENSMUSG00000025270	Alas2	aminolevulinic acid synthase 2, erythroid [Source:MGI Symbol;Acc:MGI:87990]	X	2.45719	0.00357111	0.0551541	5.51203	13.5689
ENSMUSG00000031239	Itm2a	integral membrane protein 2A [Source:MGI Symbol;Acc:MGI:107706]	X	2.80508	0.00357564	0.0551713	1.55365	4.39698
ENSMUSG00000025355	Mmp19	matrix metallopeptidase 19 [Source:MGI Symbol;Acc:MGI:1927899]	10	2.39994	0.00359186	0.0553688	0.832422	1.99915
ENSMUSG00000028793	Rnf19b	ring finger protein 19B [Source:MGI Symbol;Acc:MGI:1922484]	4	-1.96919	0.0035983	0.0553751	87.4293	44.3964
ENSMUSG00000040084	Bub1b	BUB1B, mitotic checkpoint serine/threonine kinase [Source:MGI Symbol;Acc:MGI:1333889]	2	-2.24676	0.00359912	0.0553751	4.29983	1.91629
ENSMUSG00000054792	Klhl18	kelch-like 18 [Source:MGI Symbol;Acc:MGI:2143315]	9	-2.13577	0.00361612	0.0555836	20.2154	9.46298
ENSMUSG00000063558	Aox1	aldehyde oxidase 1 [Source:MGI Symbol;Acc:MGI:88035]	1	1.63994	0.00363561	0.0558181	2.20152	3.60927
ENSMUSG00000105941	Gm42809	predicted gene 42809 [Source:MGI Symbol;Acc:MGI:5662946]	3	5.28188	0.00363829	0.0558181	0.346291	1.82873
ENSMUSG00000084788	Gm11342	predicted gene 11342 [Source:MGI Symbol;Acc:MGI:3652098]	13	-2.80229	0.00364625	0.0558872	4.88612	1.73537
ENSMUSG00000103821	D430013B06Rik	RIKEN cDNA D430013B06 gene [Source:MGI Symbol;Acc:MGI:3026994]	1	2.48283	0.00365587	0.0559796	1.0861	2.7185
ENSMUSG00000114267	Gm48600	predicted gene, 48600 [Source:MGI Symbol;Acc:MGI:6098178]	14	4.57604	0.0036592	0.0559796	0.173646	0.791282
ENSMUSG00000021396	Nxnl2	nucleoredoxin-like 2 [Source:MGI Symbol;Acc:MGI:1922374]	13	-2.68516	0.0036628	0.0559815	8.55359	3.17964
ENSMUSG00000025789	St8sia2	ST8 alpha-N-acetyl-neuraminide alpha-2,8-sialyltransferase 2 [Source:MGI Symbol;Acc:MGI:106020]	7	1.88425	0.00367369	0.056088	3.6871	6.94855
ENSMUSG00000056031	9330154J02Rik	RIKEN cDNA 9330154J02 gene [Source:MGI Symbol;Acc:MGI:3045244]	9	3.79508	0.0036767	0.056088	0.127712	0.495834
ENSMUSG00000009470	Tnpo1	transportin 1 [Source:MGI Symbol;Acc:MGI:2681523]	13	-1.63865	0.00368172	0.0561115	30.8357	18.8183
ENSMUSG00000097820	E530011L22Rik	RIKEN cDNA E530011L22 gene [Source:MGI Symbol;Acc:MGI:2443770]	9	2.1255	0.00369809	0.0563078	0.973171	2.0787
ENSMUSG00000032420	Nt5e	5' nucleotidase, ecto [Source:MGI Symbol;Acc:MGI:99782]	9	-2.33118	0.00373977	0.0568557	6.34279	2.71857
ENSMUSG00000031504	Rab20	RAB20, member RAS oncogene family [Source:MGI Symbol;Acc:MGI:102789]	8	1.7304	0.00374392	0.0568557	7.51342	13.0087
ENSMUSG00000085615	A330035P11Rik	RIKEN cDNA A330035P11 gene [Source:MGI Symbol;Acc:MGI:2442610]	14	3.1651	0.00374463	0.0568557	0.303218	0.965335
ENSMUSG00000038028	Tigar	Trp53 induced glycolysis regulatory phosphatase [Source:MGI Symbol;Acc:MGI:2442752]	6	-2.14115	0.00375731	0.0569947	3.52989	1.6421
ENSMUSG00000107412	Gm20383	predicted gene, 20383 [Source:MGI Symbol;Acc:MGI:5012568]	6	4.27665	0.00376287	0.0570255	0.40169	1.77902
ENSMUSG00000037788	Vopp1	vesicular, overexpressed in cancer, prosurvival protein 1 [Source:MGI Symbol;Acc:MGI:2141658]	6	-2.3557	0.0037729	0.0571239	6.97244	2.9585
ENSMUSG00000037946	Fgd3	FYVE, RhoGEF and PH domain containing 3 [Source:MGI Symbol;Acc:MGI:1353657]	13	-3.16769	0.00378732	0.0572711	4.0453	1.27659
ENSMUSG00000071757	Zhx2	zinc fingers and homeoboxes 2 [Source:MGI Symbol;Acc:MGI:2683087]	15	1.72887	0.00379314	0.0572711	11.7552	20.3162
ENSMUSG00000042854	Trp53rkb	transformation related protein 53 regulating kinase B [Source:MGI Symbol;Acc:MGI:1914050]	2	-2.47803	0.00379326	0.0572711	1.16513	0.469739
ENSMUSG00000029648	Flt1	FMS-like tyrosine kinase 1 [Source:MGI Symbol;Acc:MGI:95558]	5	1.792	0.00380932	0.0574599	4.33883	7.77919
ENSMUSG00000016255	Tubb1	tubulin, beta 1 class VI [Source:MGI Symbol;Acc:MGI:107814]	2	5.45197	0.00382863	0.0576973	0.302778	1.65258
ENSMUSG00000029204	Rhoh	ras homolog family member H [Source:MGI Symbol;Acc:MGI:1921984]	5	2.95326	0.00384778	0.0579318	0.344169	1.01762
ENSMUSG00000075538	Gm10855	predicted gene 10855 [Source:MGI Symbol;Acc:MGI:3641819]	2	4.71234	0.00385617	0.0580041	0.148402	0.734844
ENSMUSG00000048280	Zfp738	zinc finger protein 738 [Source:MGI Symbol;Acc:MGI:3040706]	13	-2.03852	0.00386456	0.0580284	1.17162	0.573657
ENSMUSG00000044724	Gpr152	G protein-coupled receptor 152 [Source:MGI Symbol;Acc:MGI:2685519]	19	-2.35361	0.0038662	0.0580284	8.76058	3.71888
ENSMUSG00000068154	Insm1	insulinoma-associated 1 [Source:MGI Symbol;Acc:MGI:1859980]	2	-2.43039	0.00386856	0.0580284	4.37354	1.80056
ENSMUSG00000032418	Me1	malic enzyme 1, NADP(+)-dependent, cytosolic [Source:MGI Symbol;Acc:MGI:97043]	9	-1.61861	0.0038811	0.058154	12.4813	7.70832
ENSMUSG00000029108	Pcdh7	protocadherin 7 [Source:MGI Symbol;Acc:MGI:1860487]	5	1.74689	0.00388413	0.058154	16.1309	28.1755
ENSMUSG00000067736	Gm10222	predicted gene 10222 [Source:MGI Symbol;Acc:MGI:3642643]	1	-5.9232	0.00389437	0.0582533	12.7442	2.12077
ENSMUSG00000041552	Ptchd1	patched domain containing 1 [Source:MGI Symbol;Acc:MGI:2685233]	X	3.00994	0.00390543	0.0583646	0.625399	1.90119
ENSMUSG00000021733	Slc4a7	solute carrier family 4, sodium bicarbonate cotransporter, member 7 [Source:MGI Symbol;Acc:MGI:2443878]	14	-1.8428	0.00391341	0.0584299	11.903	6.45944
ENSMUSG00000084910	C630043F03Rik	RIKEN cDNA C630043F03 gene [Source:MGI Symbol;Acc:MGI:1915535]	4	3.59343	0.00394337	0.0588228	0.486299	1.77147
ENSMUSG00000118140	Gm4949	predicted gene 4949 [Source:MGI Symbol;Acc:MGI:3646890]	18	6.38047	0.0039539	0.0589255	0.414181	2.65156
ENSMUSG00000108005	Gm44435	predicted gene, 44435 [Source:MGI Symbol;Acc:MGI:5690827]	6	3.1255	0.00397347	0.0591626	0.289959	0.90701
ENSMUSG00000039395	Mreg	melanoregulin [Source:MGI Symbol;Acc:MGI:2151839]	1	-2.0004	0.00397909	0.0591917	11.2496	5.62064
ENSMUSG00000056204	Pgpep1	pyroglutamyl-peptidase I [Source:MGI Symbol;Acc:MGI:1913772]	8	1.92203	0.00406049	0.060347	2.80382	5.39755
ENSMUSG00000030878	Cdr2	cerebellar degeneration-related 2 [Source:MGI Symbol;Acc:MGI:1100885]	7	-1.94475	0.00406536	0.0603638	18.6259	9.5745
ENSMUSG00000070473	Cldn3	claudin 3 [Source:MGI Symbol;Acc:MGI:1329044]	5	3.23366	0.00407369	0.0603971	1.06216	3.49002
ENSMUSG00000033170	Card10	caspase recruitment domain family, member 10 [Source:MGI Symbol;Acc:MGI:2146012]	15	-2.0115	0.00407507	0.0603971	12.2161	6.07352
ENSMUSG00000039683	Sdk1	sidekick cell adhesion molecule 1 [Source:MGI Symbol;Acc:MGI:2444413]	5	1.74796	0.00410071	0.0607214	5.76978	10.085
ENSMUSG00000067818	Myl9	myosin, light polypeptide 9, regulatory [Source:MGI Symbol;Acc:MGI:2138915]	2	2.2198	0.00410777	0.0607702	8.95123	19.8982
ENSMUSG00000057280	Musk	muscle, skeletal, receptor tyrosine kinase [Source:MGI Symbol;Acc:MGI:103581]	4	4.67439	0.00411176	0.0607736	0.154661	0.745873
ENSMUSG00002076237			6	-3.26383	0.00412135	0.0608218	8.15019	2.47841
ENSMUSG00000055341	Zfp457	zinc finger protein 457 [Source:MGI Symbol;Acc:MGI:2664334]	13	3.22059	0.00412256	0.0608218	0.21514	0.705519
ENSMUSG00000104164	Gm38248	predicted gene, 38248 [Source:MGI Symbol;Acc:MGI:5611476]	1	4.63886	0.00417428	0.0615288	0.0903354	0.426301
ENSMUSG00000007872	Id3	inhibitor of DNA binding 3 [Source:MGI Symbol;Acc:MGI:96398]	4	2.20868	0.00418187	0.0615801	17.6541	39.0122
ENSMUSG00000078235	Fam43b	family with sequence similarity 43, member B [Source:MGI Symbol;Acc:MGI:3651622]	4	-5.83953	0.00418958	0.0615801	0.714633	0.115132
ENSMUSG00000027765	P2ry1	purinergic receptor P2Y, G-protein coupled 1 [Source:MGI Symbol;Acc:MGI:105049]	3	3.21424	0.00418994	0.0615801	0.390741	1.26749
ENSMUSG00000031530	Dusp4	dual specificity phosphatase 4 [Source:MGI Symbol;Acc:MGI:2442191]	8	-3.12287	0.00419301	0.0615801	36.9515	11.8325
ENSMUSG00000021622	Ckmt2	creatine kinase, mitochondrial 2 [Source:MGI Symbol;Acc:MGI:1923972]	13	-2.90074	0.00421243	0.0618078	5.0088	1.72444
ENSMUSG00000031750	Il34	interleukin 34 [Source:MGI Symbol;Acc:MGI:1923777]	8	3.16352	0.00421724	0.0618078	0.896059	2.87207
ENSMUSG00000032135	Mcam	melanoma cell adhesion molecule [Source:MGI Symbol;Acc:MGI:1933966]	9	2.51793	0.00421999	0.0618078	1.21309	3.07396
ENSMUSG00000034460	Six4	sine oculis-related homeobox 4 [Source:MGI Symbol;Acc:MGI:106034]	12	2.59776	0.00423227	0.0619314	0.152479	0.396061
ENSMUSG00000025496	Drd4	dopamine receptor D4 [Source:MGI Symbol;Acc:MGI:94926]	7	-2.16272	0.00426162	0.0623044	12.6577	5.8495
ENSMUSG00000004609	Cd33	CD33 antigen [Source:MGI Symbol;Acc:MGI:99440]	7	3.13377	0.00428242	0.0625519	0.0969317	0.310514
ENSMUSG00000102577	Gm37969	predicted gene, 37969 [Source:MGI Symbol;Acc:MGI:5611197]	6	5.74272	0.00428759	0.062571	0.11212	0.671701
ENSMUSG00000028246	Faxc	failed axon connections homolog [Source:MGI Symbol;Acc:MGI:1923382]	4	-2.25564	0.00429274	0.0625896	2.88484	1.27763
ENSMUSG00000032648	Pygm	muscle glycogen phosphorylase [Source:MGI Symbol;Acc:MGI:97830]	19	1.61916	0.00431522	0.0627492	15.7664	25.525
ENSMUSG00000074785	Plxnc1	plexin C1 [Source:MGI Symbol;Acc:MGI:1890127]	10	2.46177	0.00432382	0.0627492	1.22801	3.0321
ENSMUSG00000036905	C1qb	complement component 1, q subcomponent, beta polypeptide [Source:MGI Symbol;Acc:MGI:88224]	4	2.85051	0.00432548	0.0627492	2.47631	7.1271
ENSMUSG00000040434	Large2	LARGE xylosyl- and glucuronyltransferase 2 [Source:MGI Symbol;Acc:MGI:2443769]	2	4.50409	0.00432592	0.0627492	0.0958008	0.445828
ENSMUSG00000039294	Cybc1	cytochrome b 245 chaperone 1 [Source:MGI Symbol;Acc:MGI:2384959]	11	2.14353	0.00432873	0.0627492	1.076	2.31998
ENSMUSG00000057706	Mex3b	mex3 RNA binding family member B [Source:MGI Symbol;Acc:MGI:1918252]	7	-1.84569	0.00433087	0.0627492	6.68285	3.62369
ENSMUSG00000036907	C1ql2	complement component 1, q subcomponent-like 2 [Source:MGI Symbol;Acc:MGI:3032521]	1	-2.71416	0.00433088	0.0627492	5.07826	1.86503
ENSMUSG00000030272	Camk1	calcium/calmodulin-dependent protein kinase I [Source:MGI Symbol;Acc:MGI:1098535]	6	1.78301	0.00433621	0.0627701	2.24033	3.99309
ENSMUSG00000046719	Nxph3	neurexophilin 3 [Source:MGI Symbol;Acc:MGI:1336188]	11	2.51142	0.00435989	0.0630564	1.71647	4.33194
ENSMUSG00000079445	B3gnt7	UDP-GlcNAc:betaGal beta-1,3-N-acetylglucosaminyltransferase 7 [Source:MGI Symbol;Acc:MGI:2384394]	1	7.25314	0.00436978	0.0631429	0.0413218	0.299498
ENSMUSG00000052387	Trpm3	transient receptor potential cation channel, subfamily M, member 3 [Source:MGI Symbol;Acc:MGI:2443101]	19	1.90371	0.00438996	0.0633779	33.2209	63.2419
ENSMUSG00000108076	9530086O07Rik	RIKEN cDNA 9530086O07 gene [Source:MGI Symbol;Acc:MGI:1925991]	6	3.743	0.00440755	0.0635749	0.231832	0.895039
ENSMUSG00000113041	Gm48302	predicted gene, 48302 [Source:MGI Symbol;Acc:MGI:6097746]	13	2.19424	0.00445374	0.0641439	1.96679	4.3208
ENSMUSG00000045761	Togaram2	TOG array regulator of axonemal microtubules 2 [Source:MGI Symbol;Acc:MGI:2443498]	17	2.70252	0.00445883	0.0641439	1.33983	3.61908
ENSMUSG00000021779	Thrb	thyroid hormone receptor beta [Source:MGI Symbol;Acc:MGI:98743]	14	-1.65923	0.00445891	0.0641439	8.5038	5.1249
ENSMUSG00000024424	Ttc39c	tetratricopeptide repeat domain 39C [Source:MGI Symbol;Acc:MGI:1919997]	18	-2.06487	0.00446526	0.0641782	9.13973	4.425
ENSMUSG00000041014	Nrg3	neuregulin 3 [Source:MGI Symbol;Acc:MGI:1097165]	14	-2.66018	0.00446985	0.0641856	0.998331	0.372731
ENSMUSG00000057132	Rpgrip1	retinitis pigmentosa GTPase regulator interacting protein 1 [Source:MGI Symbol;Acc:MGI:1932134]	14	-2.6932	0.00447846	0.0641856	31.8666	11.8308
ENSMUSG00000106734	Gm20559	predicted gene, 20559 [Source:MGI Symbol;Acc:MGI:5295666]	6	4.58691	0.00448042	0.0641856	0.206377	0.964513
ENSMUSG00000052056	Zfp217	zinc finger protein 217 [Source:MGI Symbol;Acc:MGI:2685408]	2	2.07774	0.00448167	0.0641856	4.05639	8.43036
ENSMUSG00000038725	Pkhd1l1	polycystic kidney and hepatic disease 1-like 1 [Source:MGI Symbol;Acc:MGI:2183153]	15	5.1629	0.00449259	0.0642388	0.0177138	0.095833
ENSMUSG00000069743	Zfp820	zinc finger protein 820 [Source:MGI Symbol;Acc:MGI:1922674]	17	4.16044	0.00449334	0.0642388	0.167627	0.703682
ENSMUSG00000026765	Lypd6b	LY6/PLAUR domain containing 6B [Source:MGI Symbol;Acc:MGI:1919147]	2	2.48323	0.00450277	0.0643167	0.609363	1.51717
ENSMUSG00000022901	Cd86	CD86 antigen [Source:MGI Symbol;Acc:MGI:101773]	16	5.16037	0.00450715	0.0643224	0.151306	0.781847
ENSMUSG00000085667	Gm12992	predicted gene 12992 [Source:MGI Symbol;Acc:MGI:3702644]	4	-1.97239	0.00451525	0.0643496	1.76245	0.892233
ENSMUSG00000052373	Mpp3	membrane protein, palmitoylated 3 (MAGUK p55 subfamily member 3) [Source:MGI Symbol;Acc:MGI:1328354]	11	2.10724	0.00451702	0.0643496	1.28491	2.71181
ENSMUSG00000042197	Zfp451	zinc finger protein 451 [Source:MGI Symbol;Acc:MGI:2137896]	1	-1.72035	0.00452755	0.0644427	7.72139	4.48803
ENSMUSG00000039477	Tnrc18	trinucleotide repeat containing 18 [Source:MGI Symbol;Acc:MGI:3648294]	5	1.64786	0.00454636	0.0646535	25.0116	41.2144
ENSMUSG00000097536	2610037D02Rik	RIKEN cDNA 2610037D02 gene [Source:MGI Symbol;Acc:MGI:1917290]	15	1.80899	0.004564	0.0648314	1.87653	3.40318
ENSMUSG00000021453	Gadd45g	growth arrest and DNA-damage-inducible 45 gamma [Source:MGI Symbol;Acc:MGI:1346325]	13	1.60059	0.00456689	0.0648314	127.125	203.469
ENSMUSG00000022906	Parp9	poly (ADP-ribose) polymerase family, member 9 [Source:MGI Symbol;Acc:MGI:1933117]	16	1.90278	0.00458945	0.0650785	1.53316	2.91336
ENSMUSG00000097823	Gm16701	predicted gene, 16701 [Source:MGI Symbol;Acc:MGI:4439625]	1	-3.08686	0.00459235	0.0650785	2.54814	0.81968
ENSMUSG00000028584	Lrrc38	leucine rich repeat containing 38 [Source:MGI Symbol;Acc:MGI:2442845]	4	3.52042	0.00462603	0.0654983	0.522056	1.85416
ENSMUSG00000000594	Gm2a	GM2 ganglioside activator protein [Source:MGI Symbol;Acc:MGI:95762]	11	1.68197	0.00463372	0.0655418	9.39641	15.7977
ENSMUSG00000106547	B230303O12Rik	RIKEN cDNA B230303O12 gene [Source:MGI Symbol;Acc:MGI:2442644]	5	-2.00118	0.00464032	0.0655418	2.03312	1.0143
ENSMUSG00000027217	Tspan18	tetraspanin 18 [Source:MGI Symbol;Acc:MGI:1917186]	2	1.78874	0.00464527	0.0655418	1.6933	3.03265
ENSMUSG00000028977	Casz1	castor zinc finger 1 [Source:MGI Symbol;Acc:MGI:1196251]	4	-1.64091	0.00464533	0.0655418	36.4602	22.2201
ENSMUSG00000110972	5830462O15Rik	RIKEN cDNA 5830462O15 gene [Source:MGI Symbol;Acc:MGI:1923360]	9	-3.53391	0.0046697	0.0658282	1.6351	0.463093
ENSMUSG00000055413	H2-Q5	histocompatibility 2, Q region locus 5 [Source:MGI Symbol;Acc:MGI:95934]	17	3.30682	0.00468035	0.0658696	0.39983	1.35384
ENSMUSG00000022270	Retreg1	reticulophagy regulator 1 [Source:MGI Symbol;Acc:MGI:1913520]	15	1.78295	0.00468369	0.0658696	9.70449	17.2944
ENSMUSG00000070532	Ccdc190	coiled-coil domain containing 190 [Source:MGI Symbol;Acc:MGI:1925715]	1	3.57007	0.00468487	0.0658696	0.490081	1.7546
ENSMUSG00000023909	Paqr4	progestin and adipoQ receptor family member IV [Source:MGI Symbol;Acc:MGI:1923748]	17	-2.44998	0.00470614	0.066111	9.86653	4.02041
ENSMUSG00000036473	Tbc1d24	TBC1 domain family, member 24 [Source:MGI Symbol;Acc:MGI:2443456]	17	-2.04953	0.00471466	0.0661731	8.51744	4.15457
ENSMUSG00000070802	Pnmal2	PNMA-like 2 [Source:MGI Symbol;Acc:MGI:3645856]	7	1.61828	0.00472039	0.066196	30.5416	49.4335
ENSMUSG00000028597	Gpx7	glutathione peroxidase 7 [Source:MGI Symbol;Acc:MGI:1914555]	4	6.06825	0.00473043	0.0662251	0.302425	1.8521
ENSMUSG00000085521	4930526A20Rik	RIKEN cDNA 4930526A20 gene [Source:MGI Symbol;Acc:MGI:3612449]	17	-3.24813	0.00473136	0.0662251	1.27556	0.385578
ENSMUSG00000098040	Gm20757	predicted gene, 20757 [Source:MGI Symbol;Acc:MGI:5434113]	10	3.45106	0.00473832	0.0662251	0.485046	1.68717
ENSMUSG00000020077	Srgn	serglycin [Source:MGI Symbol;Acc:MGI:97756]	10	3.94747	0.00473982	0.0662251	0.702028	2.81054
ENSMUSG00000061175	Fnip2	folliculin interacting protein 2 [Source:MGI Symbol;Acc:MGI:2683054]	3	-1.62888	0.00474527	0.0662251	10.0378	6.16377
ENSMUSG00000020717	Pecam1	platelet/endothelial cell adhesion molecule 1 [Source:MGI Symbol;Acc:MGI:97537]	11	-3.29074	0.00474879	0.0662251	1.03923	0.313412
ENSMUSG00000030739	Myh14	myosin, heavy polypeptide 14 [Source:MGI Symbol;Acc:MGI:1919210]	7	1.58392	0.00475116	0.0662251	11.9621	18.9419
ENSMUSG00000033278	Ptprm	protein tyrosine phosphatase, receptor type, M [Source:MGI Symbol;Acc:MGI:102694]	17	2.05392	0.00477972	0.0665658	1.84425	3.7952
ENSMUSG00000024043	Arhgap28	Rho GTPase activating protein 28 [Source:MGI Symbol;Acc:MGI:2147003]	17	-2.03635	0.00479061	0.06666	10.3095	5.06232
ENSMUSG00000022090	Pdlim2	PDZ and LIM domain 2 [Source:MGI Symbol;Acc:MGI:2384850]	14	2.87032	0.00480194	0.0667601	0.386861	1.10739
ENSMUSG00000110869	Gm49628	predicted gene, 49628 [Source:MGI Symbol;Acc:MGI:6215053]	10	-3.478	0.00480652	0.0667664	1.29635	0.370691
ENSMUSG00000063286	Gvin-ps7	GTPase, very large interferon inducible, pseudogene 7 [Source:MGI Symbol;Acc:MGI:3644223]	7	3.99502	0.00482933	0.0670257	0.0947811	0.384027
ENSMUSG00000046807	Lrrc75b	leucine rich repeat containing 75B [Source:MGI Symbol;Acc:MGI:2143657]	10	1.90513	0.00488148	0.0676913	3.40182	6.48234
ENSMUSG00000001436	Slc19a1	solute carrier family 19 (folate transporter), member 1 [Source:MGI Symbol;Acc:MGI:103182]	10	1.98059	0.00489704	0.0678488	1.82599	3.62587
ENSMUSG00000038115	Ano2	anoctamin 2 [Source:MGI Symbol;Acc:MGI:2387214]	6	-2.11082	0.00490247	0.0678658	11.7785	5.57674
ENSMUSG00000069272	H2ac8	H2A clustered histone 8 [Source:MGI Symbol;Acc:MGI:2448290]	13	2.95873	0.00492831	0.068165	1.09541	3.28333
ENSMUSG00000025026	Add3	adducin 3 (gamma) [Source:MGI Symbol;Acc:MGI:1351615]	19	1.62301	0.00505251	0.0698232	25.7877	41.8609
ENSMUSG00000093865	Lrit3	leucine-rich repeat, immunoglobulin-like and transmembrane domains 3 [Source:MGI Symbol;Acc:MGI:2685267]	3	-2.49976	0.00505748	0.0698322	11.7381	4.68795
ENSMUSG00000022091	Sorbs3	sorbin and SH3 domain containing 3 [Source:MGI Symbol;Acc:MGI:700013]	14	1.64118	0.00507505	0.0700042	7.66173	12.5851
ENSMUSG00000039789	Zfp597	zinc finger protein 597 [Source:MGI Symbol;Acc:MGI:1918313]	16	-1.81877	0.00507861	0.0700042	3.61247	1.98588
ENSMUSG00000033777	Tlr13	toll-like receptor 13 [Source:MGI Symbol;Acc:MGI:3045213]	X	4.87024	0.00508409	0.07002	0.0738935	0.365813
ENSMUSG00000037143	Cfap61	cilia and flagella associated protein 61 [Source:MGI Symbol;Acc:MGI:1926024]	2	-2.57936	0.0051292	0.0705806	1.04791	0.405258
ENSMUSG00000055866	Per2	period circadian clock 2 [Source:MGI Symbol;Acc:MGI:1195265]	1	1.5443	0.0051345	0.0705806	11.1602	17.2362
ENSMUSG00000074570	Cass4	Cas scaffolding protein family member 4 [Source:MGI Symbol;Acc:MGI:2444482]	2	4.07229	0.00513894	0.0705806	0.0690081	0.289027
ENSMUSG00000106732	Gm43792	predicted gene 43792 [Source:MGI Symbol;Acc:MGI:5663929]	5	-3.38074	0.00514227	0.0705806	1.70054	0.497142
ENSMUSG00000062859	Tcp11	t-complex protein 11 [Source:MGI Symbol;Acc:MGI:98544]	17	-2.36882	0.00515366	0.0706189	2.31163	0.97197
ENSMUSG00000034707	Gns	glucosamine (N-acetyl)-6-sulfatase [Source:MGI Symbol;Acc:MGI:1922862]	10	1.59874	0.0051538	0.0706189	18.818	30.083
ENSMUSG00000061666	Gdpd1	glycerophosphodiester phosphodiesterase domain containing 1 [Source:MGI Symbol;Acc:MGI:1913819]	11	-1.91537	0.00516935	0.0707719	5.49217	2.8634
ENSMUSG00000052336	Cx3cr1	chemokine (C-X3-C motif) receptor 1 [Source:MGI Symbol;Acc:MGI:1333815]	9	2.86076	0.00522493	0.0714722	0.501238	1.4421
ENSMUSG00000028453	Fancg	Fanconi anemia, complementation group G [Source:MGI Symbol;Acc:MGI:1926471]	4	-2.47327	0.00524989	0.0717437	1.3862	0.555555
ENSMUSG00000030701	Plekhb1	pleckstrin homology domain containing, family B (evectins) member 1 [Source:MGI Symbol;Acc:MGI:1351469]	7	-1.95454	0.00525365	0.0717437	65.9327	33.731
ENSMUSG00000032047	Acat1	acetyl-Coenzyme A acetyltransferase 1 [Source:MGI Symbol;Acc:MGI:87870]	9	1.59135	0.00526389	0.0717448	6.64232	10.5781
ENSMUSG00000022010	Tsc22d1	TSC22 domain family, member 1 [Source:MGI Symbol;Acc:MGI:109127]	14	1.70308	0.00526595	0.0717448	50.8535	86.6062
ENSMUSG00000104728	Gm42462	predicted gene 42462 [Source:MGI Symbol;Acc:MGI:5662599]	5	-4.26256	0.00526706	0.0717448	3.95292	0.91541
ENSMUSG00000043419	Rnf227	ring finger protein 227 [Source:MGI Symbol;Acc:MGI:1915359]	11	-2.68089	0.00533822	0.0725643	3.41962	1.27018
ENSMUSG00000034947	Tmem106a	transmembrane protein 106A [Source:MGI Symbol;Acc:MGI:1922056]	11	2.97677	0.00534053	0.0725643	0.298057	0.889505
ENSMUSG00000049892	Rasd1	RAS, dexamethasone-induced 1 [Source:MGI Symbol;Acc:MGI:1270848]	11	2.08418	0.00534069	0.0725643	5.06099	10.5882
ENSMUSG00000033007	Asic4	acid-sensing (proton-gated) ion channel family member 4 [Source:MGI Symbol;Acc:MGI:2652846]	1	-2.6891	0.00534725	0.0725695	5.68771	2.11046
ENSMUSG00000084391	Gm13967	predicted gene 13967 [Source:MGI Symbol;Acc:MGI:3650703]	2	-5.01931	0.00535007	0.0725695	2.44338	0.441762
ENSMUSG00000034832	Tet3	tet methylcytosine dioxygenase 3 [Source:MGI Symbol;Acc:MGI:2446229]	6	-1.79424	0.00538918	0.0729834	35.8677	19.9898
ENSMUSG00000037306	Man1c1	mannosidase, alpha, class 1C, member 1 [Source:MGI Symbol;Acc:MGI:2446214]	4	1.76881	0.00538961	0.0729834	19.4743	34.4433
ENSMUSG00000041935	AW549877	expressed sequence AW549877 [Source:MGI Symbol;Acc:MGI:2146232]	15	-1.59494	0.00539758	0.0730301	6.99781	4.39012
ENSMUSG00000017723	Wfdc2	WAP four-disulfide core domain 2 [Source:MGI Symbol;Acc:MGI:1914951]	2	4.23198	0.00540968	0.0731326	1.2901	5.53921
ENSMUSG00000031971	Ccsap	centriole, cilia and spindle associated protein [Source:MGI Symbol;Acc:MGI:1920670]	8	-1.99597	0.00542468	0.0732656	6.34155	3.17385
ENSMUSG00000033342	Plppr5	phospholipid phosphatase related 5 [Source:MGI Symbol;Acc:MGI:1923019]	3	-4.67426	0.00542859	0.0732656	1.2759	0.269436
ENSMUSG00000036553	Sh3tc1	SH3 domain and tetratricopeptide repeats 1 [Source:MGI Symbol;Acc:MGI:2678949]	5	2.56994	0.00543488	0.0732892	0.374944	0.97021
ENSMUSG00000074676	Foxs1	forkhead box S1 [Source:MGI Symbol;Acc:MGI:95546]	2	6.51513	0.00546011	0.0735681	0.140875	0.970184
ENSMUSG00000042763	Maneal	mannosidase, endo-alpha-like [Source:MGI Symbol;Acc:MGI:2684896]	4	-2.09767	0.0054719	0.0736655	7.92253	3.77423
ENSMUSG00000020718	Polg2	polymerase (DNA directed), gamma 2, accessory subunit [Source:MGI Symbol;Acc:MGI:1354947]	11	-2.37372	0.00549171	0.0738707	4.75941	2.00144
ENSMUSG00000021974	Fgf9	fibroblast growth factor 9 [Source:MGI Symbol;Acc:MGI:104723]	14	-2.3994	0.00549817	0.0738818	2.14257	0.8915
ENSMUSG00000044197	Gpr146	G protein-coupled receptor 146 [Source:MGI Symbol;Acc:MGI:1933113]	5	1.73583	0.00550266	0.0738818	4.39973	7.63846
ENSMUSG00000053046	Brsk2	BR serine/threonine kinase 2 [Source:MGI Symbol;Acc:MGI:1923020]	7	-2.14249	0.00550627	0.0738818	11.2182	5.23522
ENSMUSG00000048706	Lurap1l	leucine rich adaptor protein 1-like [Source:MGI Symbol;Acc:MGI:106510]	4	-1.92752	0.00551289	0.0739093	9.30013	4.82453
ENSMUSG00000017686	Rhot1	ras homolog family member T1 [Source:MGI Symbol;Acc:MGI:1926078]	11	-1.89485	0.00552486	0.0740083	14.2712	7.52994
ENSMUSG00000053175	Bcl3	B cell leukemia/lymphoma 3 [Source:MGI Symbol;Acc:MGI:88140]	7	2.38299	0.00554982	0.0742811	4.35859	10.3997
ENSMUSG00000031075	Ano1	anoctamin 1, calcium activated chloride channel [Source:MGI Symbol;Acc:MGI:2142149]	7	2.32232	0.00556513	0.0744244	0.329172	0.768939
ENSMUSG00000018574	Acadvl	acyl-Coenzyme A dehydrogenase, very long chain [Source:MGI Symbol;Acc:MGI:895149]	11	-1.54134	0.00558389	0.0745307	21.7874	14.1367
ENSMUSG00000026077	Npas2	neuronal PAS domain protein 2 [Source:MGI Symbol;Acc:MGI:109232]	1	2.62994	0.00558451	0.0745307	0.690455	1.82356
ENSMUSG00000119895	U1	U1 spliceosomal RNA [Source:RFAM;Acc:RF00003]	12	-1.93882	0.00558692	0.0745307	114.272	58.9709
ENSMUSG00000035270	Impg2	interphotoreceptor matrix proteoglycan 2 [Source:MGI Symbol;Acc:MGI:3044955]	16	-2.17247	0.0056613	0.0754606	15.3954	7.08506
ENSMUSG00000060376	Bckdha	branched chain ketoacid dehydrogenase E1, alpha polypeptide [Source:MGI Symbol;Acc:MGI:107701]	7	1.70416	0.00567575	0.075563	7.56123	12.8716
ENSMUSG00000021591	Glrx	glutaredoxin [Source:MGI Symbol;Acc:MGI:2135625]	13	2.82684	0.00567833	0.075563	0.682069	1.93456
ENSMUSG00000031355	Arhgap6	Rho GTPase activating protein 6 [Source:MGI Symbol;Acc:MGI:1196332]	X	2.05196	0.00568856	0.0756368	0.361924	0.742891
ENSMUSG00000112323	Gm32828	predicted gene, 32828 [Source:MGI Symbol;Acc:MGI:5591987]	12	-4.90038	0.00572046	0.0759984	0.824235	0.167956
ENSMUSG00000028931	Kcnab2	potassium voltage-gated channel, shaker-related subfamily, beta member 2 [Source:MGI Symbol;Acc:MGI:109239]	4	-1.94015	0.00574316	0.0761882	12.3585	6.36876
ENSMUSG00000035504	Reep6	receptor accessory protein 6 [Source:MGI Symbol;Acc:MGI:1917585]	10	-2.10404	0.00574418	0.0761882	201.294	95.668
ENSMUSG00000035184	Fam124a	family with sequence similarity 124, member A [Source:MGI Symbol;Acc:MGI:3645930]	14	-2.41732	0.00576251	0.0763686	0.931224	0.385166
ENSMUSG00000106619	Gm9353	predicted gene 9353 [Source:MGI Symbol;Acc:MGI:3644601]	3	4.63489	0.00576724	0.0763687	0.50678	2.42882
ENSMUSG00000046404	Yod1	YOD1 deubiquitinase [Source:MGI Symbol;Acc:MGI:2442596]	1	-1.96291	0.00577724	0.0764385	15.3308	7.80968
ENSMUSG00000035615	Frmpd1	FERM and PDZ domain containing 1 [Source:MGI Symbol;Acc:MGI:2446274]	4	-1.85846	0.00580768	0.0767731	30.9091	16.6302
ENSMUSG00000055865	Tafa3	TAFA chemokine like family member 3 [Source:MGI Symbol;Acc:MGI:3046463]	3	-2.37161	0.00581351	0.0767731	4.56067	1.92003
ENSMUSG00000041180	Hectd2	HECT domain E3 ubiquitin protein ligase 2 [Source:MGI Symbol;Acc:MGI:2442663]	19	-1.91852	0.00581683	0.0767731	1.24567	0.648518
ENSMUSG00000107304	Gm43775	predicted gene 43775 [Source:MGI Symbol;Acc:MGI:5663912]	5	5.15619	0.00582154	0.0767731	0.10578	0.568539
ENSMUSG00000078496	Zfp982	zinc finger protein 982 [Source:MGI Symbol;Acc:MGI:3701121]	4	1.84075	0.00584156	0.0768545	4.11269	7.56519
ENSMUSG00000019235	Rps6kl1	ribosomal protein S6 kinase-like 1 [Source:MGI Symbol;Acc:MGI:2443413]	12	-3.46963	0.00584186	0.0768545	1.40254	0.401598
ENSMUSG00000025425	St8sia5	ST8 alpha-N-acetyl-neuraminide alpha-2,8-sialyltransferase 5 [Source:MGI Symbol;Acc:MGI:109243]	18	-2.37764	0.00584199	0.0768545	1.52049	0.639479
ENSMUSG00000022469	Rapgef3	Rap guanine nucleotide exchange factor (GEF) 3 [Source:MGI Symbol;Acc:MGI:2441741]	15	1.67722	0.00588517	0.0773596	7.47461	12.5397
ENSMUSG00000039662	Icmt	isoprenylcysteine carboxyl methyltransferase [Source:MGI Symbol;Acc:MGI:1888594]	4	-1.81639	0.00591376	0.0776721	32.6762	17.9874
ENSMUSG00000060678	H4c3	H4 clustered histone 3 [Source:MGI Symbol;Acc:MGI:2448421]	13	-1.79142	0.0059988	0.0787251	39.9384	22.3138
ENSMUSG00000113321	Gm8075	predicted gene 8075 [Source:MGI Symbol;Acc:MGI:3643190]	12	4.78456	0.00600698	0.0787684	0.625191	3.00429
ENSMUSG00000028280	Gabrr1	gamma-aminobutyric acid (GABA) C receptor, subunit rho 1 [Source:MGI Symbol;Acc:MGI:95625]	4	-2.73952	0.00601546	0.0788157	6.75928	2.46074
ENSMUSG00000107614	Gm44196	predicted gene, 44196 [Source:MGI Symbol;Acc:MGI:5690588]	6	-2.61832	0.00604282	0.07911	4.61403	1.75634
ENSMUSG00000024511	Rab27b	RAB27B, member RAS oncogene family [Source:MGI Symbol;Acc:MGI:1931295]	18	1.72256	0.00607437	0.0794586	2.34064	4.02994
ENSMUSG00000084870	Gm13954	predicted gene 13954 [Source:MGI Symbol;Acc:MGI:3649858]	2	3.247	0.00607943	0.0794605	1.31787	4.3153
ENSMUSG00000051262	Nat8f3	N-acetyltransferase 8 (GCN5-related) family member 3 [Source:MGI Symbol;Acc:MGI:2136449]	6	7.52787	0.00610327	0.0797077	0.068752	0.543536
ENSMUSG00000025757	Hspa4l	heat shock protein 4 like [Source:MGI Symbol;Acc:MGI:107422]	3	-1.73003	0.00614263	0.0801568	17.7299	10.248
ENSMUSG00000023979	Guca1b	guanylate cyclase activator 1B [Source:MGI Symbol;Acc:MGI:1194489]	17	-2.19964	0.00616061	0.0803266	63.0829	28.6732
ENSMUSG00000053214	Gm9899	predicted gene 9899 [Source:MGI Symbol;Acc:MGI:3708711]	5	-2.78001	0.00626302	0.081596	0.446461	0.15951
ENSMUSG00000027168	Pax6	paired box 6 [Source:MGI Symbol;Acc:MGI:97490]	2	1.69772	0.00632993	0.0824013	24.9949	42.4343
ENSMUSG00000025666	Tmem47	transmembrane protein 47 [Source:MGI Symbol;Acc:MGI:2177570]	X	1.64264	0.00634513	0.0825327	8.33569	13.6908
ENSMUSG00000048603	Gm9828	predicted gene 9828 [Source:MGI Symbol;Acc:MGI:3642913]	13	-4.50276	0.00638956	0.0830438	0.579118	0.121446
ENSMUSG00000038894	Irs2	insulin receptor substrate 2 [Source:MGI Symbol;Acc:MGI:109334]	8	1.9187	0.00644027	0.0836355	30.4489	58.4225
ENSMUSG00000024339	Tap2	transporter 2, ATP-binding cassette, sub-family B (MDR/TAP) [Source:MGI Symbol;Acc:MGI:98484]	17	1.70084	0.00648982	0.0842113	3.93238	6.69021
ENSMUSG00000056666	Retsat	retinol saturase (all trans retinol 13,14 reductase) [Source:MGI Symbol;Acc:MGI:1914692]	6	1.8302	0.00649885	0.0842608	1.9567	3.57694
ENSMUSG00000047638	Nr1h4	nuclear receptor subfamily 1, group H, member 4 [Source:MGI Symbol;Acc:MGI:1352464]	10	3.92928	0.00658004	0.0851847	0.707294	2.82087
ENSMUSG00000020668	Kif3c	kinesin family member 3C [Source:MGI Symbol;Acc:MGI:107979]	12	-1.51981	0.00658065	0.0851847	8.92587	5.87341
ENSMUSG00000044786	Zfp36	zinc finger protein 36 [Source:MGI Symbol;Acc:MGI:99180]	7	2.04416	0.00661666	0.0855822	175.236	358.216
ENSMUSG00000023092	Fhl1	four and a half LIM domains 1 [Source:MGI Symbol;Acc:MGI:1298387]	X	1.8062	0.00663902	0.0858027	4.85597	8.78441
ENSMUSG00000022129	Dct	dopachrome tautomerase [Source:MGI Symbol;Acc:MGI:102563]	14	2.83718	0.00664806	0.0858443	10.8257	30.7229
ENSMUSG00000017615	Tnfaip1	tumor necrosis factor, alpha-induced protein 1 (endothelial) [Source:MGI Symbol;Acc:MGI:104961]	11	1.67325	0.00665287	0.0858443	4.79173	8.01974
ENSMUSG00000024960	Plcb3	phospholipase C, beta 3 [Source:MGI Symbol;Acc:MGI:104778]	19	1.76286	0.00668015	0.0861275	3.92984	6.92509
ENSMUSG00000081944	Gm12276	predicted gene 12276 [Source:MGI Symbol;Acc:MGI:3649700]	11	-6.00179	0.00669484	0.0862481	7.68029	1.27593
ENSMUSG00000074220	Zfp382	zinc finger protein 382 [Source:MGI Symbol;Acc:MGI:3588204]	7	-1.84724	0.00670294	0.0862837	7.68215	4.16057
ENSMUSG00000041117	Ccdc8	coiled-coil domain containing 8 [Source:MGI Symbol;Acc:MGI:3612184]	7	2.70069	0.00671844	0.086299	0.647329	1.75153
ENSMUSG00000059602	Syn3	synapsin III [Source:MGI Symbol;Acc:MGI:1351334]	10	1.89877	0.00671877	0.086299	0.972982	1.85201
ENSMUSG00000049811	Fam161a	family with sequence similarity 161, member A [Source:MGI Symbol;Acc:MGI:1921123]	11	-2.31125	0.00672016	0.086299	30.1685	13.049
ENSMUSG00000044522	A730020M07Rik	RIKEN cDNA A730020M07 gene [Source:MGI Symbol;Acc:MGI:2442643]	3	5.42659	0.00678859	0.0871086	0.191894	1.08232
ENSMUSG00000022105	Rb1	RB transcriptional corepressor 1 [Source:MGI Symbol;Acc:MGI:97874]	14	-1.57843	0.00681069	0.0872703	7.21214	4.56624
ENSMUSG00000027737	Slc7a11	solute carrier family 7 (cationic amino acid transporter, y+ system), member 11 [Source:MGI Symbol;Acc:MGI:1347355]	3	1.75748	0.006812	0.0872703	12.436	21.8557
ENSMUSG00000031958	Ldhd	lactate dehydrogenase D [Source:MGI Symbol;Acc:MGI:106428]	8	2.10007	0.00682232	0.0873332	0.521194	1.09596
ENSMUSG00000050505	Pcdh20	protocadherin 20 [Source:MGI Symbol;Acc:MGI:2443376]	14	2.86096	0.0068974	0.0882244	0.26401	0.752886
ENSMUSG00000111088	9430081H08Rik	RIKEN cDNA 9430081H08 gene [Source:MGI Symbol;Acc:MGI:1924680]	9	-3.50487	0.00690383	0.0882369	1.67862	0.462954
ENSMUSG00000038415	Foxq1	forkhead box Q1 [Source:MGI Symbol;Acc:MGI:1298228]	13	-3.26745	0.00691947	0.0883668	0.939081	0.286668
ENSMUSG00000030327	Necap1	NECAP endocytosis associated 1 [Source:MGI Symbol;Acc:MGI:1914852]	6	-1.64344	0.00693681	0.0885183	12.5233	7.61756
ENSMUSG00000025192	Entpd7	ectonucleoside triphosphate diphosphohydrolase 7 [Source:MGI Symbol;Acc:MGI:2135885]	19	-2.15481	0.00695333	0.0886591	4.94428	2.29443
ENSMUSG00000026646	Suv39h2	suppressor of variegation 3-9 2 [Source:MGI Symbol;Acc:MGI:1890396]	2	-2.10239	0.00696149	0.0886931	2.77419	1.31837
ENSMUSG00000026360	Rgs2	regulator of G-protein signaling 2 [Source:MGI Symbol;Acc:MGI:1098271]	1	2.16121	0.00698082	0.0888693	5.17357	11.1875
ENSMUSG00000022494	Shisa9	shisa family member 9 [Source:MGI Symbol;Acc:MGI:1919805]	16	1.50523	0.00702211	0.0892855	8.73495	13.1516
ENSMUSG00000110020	Gm45441	predicted gene 45441 [Source:MGI Symbol;Acc:MGI:5791277]	7	-2.72505	0.00702516	0.0892855	2.58951	0.946504
ENSMUSG00000001138	Cnnm3	cyclin M3 [Source:MGI Symbol;Acc:MGI:2151055]	1	1.80024	0.007032	0.0892855	2.75114	4.95597
ENSMUSG00000067220	Cnga1	cyclic nucleotide gated channel alpha 1 [Source:MGI Symbol;Acc:MGI:88436]	5	-2.2113	0.00704093	0.0892855	39.6847	17.9438
ENSMUSG00000081152	Gm12430	predicted gene 12430 [Source:MGI Symbol;Acc:MGI:3651061]	4	2.74989	0.00704114	0.0892855	0.746963	2.07056
ENSMUSG00000015474	Ppt2	palmitoyl-protein thioesterase 2 [Source:MGI Symbol;Acc:MGI:1860075]	17	2.18498	0.00705022	0.0893304	0.994938	2.17308
ENSMUSG00000106772	Gm43794	predicted gene 43794 [Source:MGI Symbol;Acc:MGI:5663931]	5	-2.90072	0.00708421	0.0896907	2.9343	1.0064
ENSMUSG00000042750	Bex2	brain expressed X-linked 2 [Source:MGI Symbol;Acc:MGI:1338017]	X	-2.26887	0.00709486	0.0897553	32.0928	14.1455
ENSMUSG00000035126	Dnai4	dynein axonemal intermediate chain 4 [Source:MGI Symbol;Acc:MGI:2385328]	4	-2.06412	0.00710335	0.0897923	13.1126	6.35045
ENSMUSG00000115555	Gm49307	predicted gene, 49307 [Source:MGI Symbol;Acc:MGI:6118808]	14	2.56179	0.00713663	0.0901425	1.19261	3.06241
ENSMUSG00000039063	Echdc3	enoyl Coenzyme A hydratase domain containing 3 [Source:MGI Symbol;Acc:MGI:1915106]	2	2.11921	0.00715772	0.0903382	1.06607	2.26708
ENSMUSG00000021879	Dnah12	dynein, axonemal, heavy chain 12 [Source:MGI Symbol;Acc:MGI:107720]	14	-3.67272	0.00720587	0.0908749	0.177331	0.0473265
ENSMUSG00000038152	5033430I15Rik	RIKEN cDNA 5033430I15 gene [Source:MGI Symbol;Acc:MGI:1923250]	13	-3.37894	0.00722689	0.091069	4.08096	1.19337
ENSMUSG00000046879	Irgm1	immunity-related GTPase family M member 1 [Source:MGI Symbol;Acc:MGI:107567]	11	1.757	0.00723445	0.09107	9.1264	16.0309
ENSMUSG00000021870	Slmap	sarcolemma associated protein [Source:MGI Symbol;Acc:MGI:1933549]	14	1.72518	0.00723825	0.09107	12.7964	22.0812
ENSMUSG00000031467	Agpat5	1-acylglycerol-3-phosphate O-acyltransferase 5 (lysophosphatidic acid acyltransferase, epsilon) [Source:MGI Symbol;Acc:MGI:1196345]	8	-1.72647	0.00728208	0.0915501	3.24776	1.88032
ENSMUSG00000034105	Meak7	MTOR associated protein , eak-7 homolog [Source:MGI Symbol;Acc:MGI:1921597]	8	-1.97339	0.00729815	0.0916809	6.87284	3.47981
ENSMUSG00000041642	Kif21b	kinesin family member 21B [Source:MGI Symbol;Acc:MGI:109234]	1	-2.04757	0.00733569	0.0920229	33.4677	16.3445
ENSMUSG00000005360	Slc1a3	solute carrier family 1 (glial high affinity glutamate transporter), member 3 [Source:MGI Symbol;Acc:MGI:99917]	15	1.89564	0.00733677	0.0920229	8.29283	15.727
ENSMUSG00000028028	Alpk1	alpha-kinase 1 [Source:MGI Symbol;Acc:MGI:1918731]	3	3.58694	0.00734416	0.0920442	0.760897	2.73905
ENSMUSG00000016624	Phf21b	PHD finger protein 21B [Source:MGI Symbol;Acc:MGI:2443812]	15	-2.06196	0.00736653	0.0921741	6.87241	3.32889
ENSMUSG00000041133	Smc1a	structural maintenance of chromosomes 1A [Source:MGI Symbol;Acc:MGI:1344345]	X	1.56296	0.00737221	0.0921741	40.3978	63.1386
ENSMUSG00000024772	Ehd1	EH-domain containing 1 [Source:MGI Symbol;Acc:MGI:1341878]	19	-1.90576	0.00737377	0.0921741	43.5986	22.8767
ENSMUSG00000050556	Kcnb1	potassium voltage gated channel, Shab-related subfamily, member 1 [Source:MGI Symbol;Acc:MGI:96666]	2	-2.10015	0.00738285	0.0921741	78.3114	37.2877
ENSMUSG00000110246	C130073E24Rik	RIKEN cDNA C130073E24 gene [Source:MGI Symbol;Acc:MGI:2442759]	8	-2.80589	0.00738706	0.0921741	0.603644	0.214379
ENSMUSG00000090523	Gypc	glycophorin C [Source:MGI Symbol;Acc:MGI:1098566]	18	2.95066	0.00738877	0.0921741	0.440158	1.31761
ENSMUSG00000047238	Mageh1	MAGE family member H1 [Source:MGI Symbol;Acc:MGI:1922875]	X	1.76097	0.00740647	0.0923081	6.42197	11.336
ENSMUSG00000049690	Nckap5	NCK-associated protein 5 [Source:MGI Symbol;Acc:MGI:2686394]	1	1.53457	0.00741093	0.0923081	6.32918	9.71135
ENSMUSG00000048200	Cracr2b	calcium release activated channel regulator 2B [Source:MGI Symbol;Acc:MGI:2446129]	7	2.32086	0.00746505	0.0929105	0.72847	1.70566
ENSMUSG00000107436	Gm44416	predicted gene, 44416 [Source:MGI Symbol;Acc:MGI:5690808]	6	4.03482	0.00750003	0.093274	0.306254	1.26275
ENSMUSG00000014075	Dynlt2b	dynein light chain Tctex-type 2B [Source:MGI Symbol;Acc:MGI:1913311]	16	-2.24501	0.0075613	0.0939052	2.56308	1.14521
ENSMUSG00000031639	Tlr3	toll-like receptor 3 [Source:MGI Symbol;Acc:MGI:2156367]	8	2.29574	0.00756241	0.0939052	0.587849	1.35628
ENSMUSG00000072624	Gm5460	predicted gene 5460 [Source:MGI Symbol;Acc:MGI:3643519]	14	-3.09688	0.00757529	0.0939929	1.64789	0.529806
ENSMUSG00000111682	Gm47543	predicted gene, 47543 [Source:MGI Symbol;Acc:MGI:6096554]	9	-2.65886	0.00763928	0.0947142	6.20711	2.32079
ENSMUSG00000035653	Lrfn5	leucine rich repeat and fibronectin type III domain containing 5 [Source:MGI Symbol;Acc:MGI:2144814]	12	-3.04732	0.00767434	0.0950758	0.629249	0.205104
ENSMUSG00000037411	Serpine1	serine (or cysteine) peptidase inhibitor, clade E, member 1 [Source:MGI Symbol;Acc:MGI:97608]	5	2.64081	0.00768301	0.0951104	63.9752	168.958
ENSMUSG00000097275	Gm26648	predicted gene, 26648 [Source:MGI Symbol;Acc:MGI:5477142]	5	4.19892	0.00769927	0.095197	0.0784494	0.337335
ENSMUSG00000042210	Abhd14a	abhydrolase domain containing 14A [Source:MGI Symbol;Acc:MGI:1915894]	9	-1.91396	0.00770179	0.095197	12.1376	6.33536
ENSMUSG00000035342	Lzts2	leucine zipper, putative tumor suppressor 2 [Source:MGI Symbol;Acc:MGI:2385095]	19	1.56667	0.00773336	0.0955141	6.3108	9.89483
ENSMUSG00000031789	Cngb1	cyclic nucleotide gated channel beta 1 [Source:MGI Symbol;Acc:MGI:2664102]	8	-2.17383	0.00775845	0.0956782	48.425	22.2753
ENSMUSG00000016918	Sulf1	sulfatase 1 [Source:MGI Symbol;Acc:MGI:2138563]	1	-1.76223	0.00776091	0.0956782	26.5632	15.0724
ENSMUSG00000001864	Aif1l	allograft inflammatory factor 1-like [Source:MGI Symbol;Acc:MGI:1919598]	2	1.92691	0.00776442	0.0956782	1.84458	3.55823
ENSMUSG00000056481	Cd248	CD248 antigen, endosialin [Source:MGI Symbol;Acc:MGI:1917695]	19	4.94692	0.00777708	0.0957612	0.264207	1.32063
ENSMUSG00000097603	A430010J10Rik	RIKEN cDNA A430010J10 gene [Source:MGI Symbol;Acc:MGI:2442501]	6	-3.15737	0.00780023	0.0959323	0.459197	0.143348
ENSMUSG00000026317	Cln8	CLN8 transmembrane ER and ERGIC protein [Source:MGI Symbol;Acc:MGI:1349447]	8	-1.94764	0.00780386	0.0959323	10.8037	5.54749
ENSMUSG00000113940	Gm40477	predicted gene, 40477 [Source:MGI Symbol;Acc:MGI:5623362]	12	-4.71329	0.00780879	0.0959323	4.14679	0.864549
ENSMUSG00000002147	Stat6	signal transducer and activator of transcription 6 [Source:MGI Symbol;Acc:MGI:103034]	10	1.89718	0.0078252	0.0960609	1.32827	2.51823
ENSMUSG00000055150	Zfp78	zinc finger protein 78 [Source:MGI Symbol;Acc:MGI:107783]	7	-2.17797	0.00785076	0.0962411	1.04957	0.480821
ENSMUSG00000002871	Tpra1	transmembrane protein, adipocyte asscociated 1 [Source:MGI Symbol;Acc:MGI:1345190]	6	1.78123	0.0078518	0.0962411	3.75628	6.6948
ENSMUSG00000105485	Gm42447	predicted gene 42447 [Source:MGI Symbol;Acc:MGI:5662584]	5	-4.91504	0.00790595	0.0968314	0.808688	0.15933
ENSMUSG00000108614	2610306O10Rik	RIKEN cDNA 2610306O10 gene [Source:MGI Symbol;Acc:MGI:1917710]	7	2.63526	0.00792494	0.0969486	4.37961	11.5487
ENSMUSG00000040632	Nrl	neural retina leucine zipper gene [Source:MGI Symbol;Acc:MGI:102567]	14	-2.04835	0.00792752	0.0969486	40.3715	19.7069
ENSMUSG00000000126	Wnt9a	wingless-type MMTV integration site family, member 9A [Source:MGI Symbol;Acc:MGI:2446084]	11	2.37256	0.00794088	0.0970386	0.653868	1.55523
ENSMUSG00000074682	Zcchc3	zinc finger, CCHC domain containing 3 [Source:MGI Symbol;Acc:MGI:1915167]	2	-1.77527	0.00795548	0.0971434	4.78041	2.69362
ENSMUSG00000094441	Zfp955a	zinc finger protein 955A [Source:MGI Symbol;Acc:MGI:4834570]	17	-1.81496	0.00798327	0.0974092	3.4985	1.92774
ENSMUSG00000040723	Rcsd1	RCSD domain containing 1 [Source:MGI Symbol;Acc:MGI:2676394]	1	6.31537	0.00799127	0.0974332	0.0417776	0.271493
ENSMUSG00000025575	Cant1	calcium activated nucleotidase 1 [Source:MGI Symbol;Acc:MGI:1923275]	11	1.58342	0.00802846	0.0978128	6.14443	9.73039
ENSMUSG00000033308	Dpyd	dihydropyrimidine dehydrogenase [Source:MGI Symbol;Acc:MGI:2139667]	3	2.99083	0.00804531	0.0979442	0.125289	0.373188
ENSMUSG00000079014	Serpina3i	serine (or cysteine) peptidase inhibitor, clade A, member 3I [Source:MGI Symbol;Acc:MGI:2182841]	12	3.66679	0.00805918	0.0980392	0.173773	0.664891
ENSMUSG00000030844	Rgs10	regulator of G-protein signalling 10 [Source:MGI Symbol;Acc:MGI:1915115]	7	2.15719	0.00806626	0.0980515	1.75545	3.8059
ENSMUSG00000047180	Neurl3	neuralized E3 ubiquitin protein ligase 3 [Source:MGI Symbol;Acc:MGI:2429944]	1	3.97746	0.00807797	0.09812	0.456627	1.8434
ENSMUSG00000029723	Tsc22d4	TSC22 domain family, member 4 [Source:MGI Symbol;Acc:MGI:1926079]	5	1.6134	0.00808537	0.0981361	4.64727	7.49519
ENSMUSG00000028024	Enpep	glutamyl aminopeptidase [Source:MGI Symbol;Acc:MGI:106645]	3	3.45467	0.00813727	0.0986919	0.277787	0.965102
ENSMUSG00000100706	Gm19744	predicted gene, 19744 [Source:MGI Symbol;Acc:MGI:5011929]	8	3.06244	0.00815664	0.0988526	0.137455	0.427278
ENSMUSG00000023886	Smoc2	SPARC related modular calcium binding 2 [Source:MGI Symbol;Acc:MGI:1929881]	17	3.24894	0.00816568	0.0988879	0.094348	0.314839
ENSMUSG00000067367	Lyar	Ly1 antibody reactive clone [Source:MGI Symbol;Acc:MGI:107470]	5	-1.65659	0.00818018	0.0989894	16.7788	10.1302
ENSMUSG00000035910	Dcdc2a	doublecortin domain containing 2a [Source:MGI Symbol;Acc:MGI:2652818]	13	-3.34275	0.00823292	0.099553	0.499104	0.149574
ENSMUSG00000021684	Pde8b	phosphodiesterase 8B [Source:MGI Symbol;Acc:MGI:2443999]	13	-2.05717	0.008255	0.0997454	7.11215	3.45566
ENSMUSG00000087006	Gm13889	predicted gene 13889 [Source:MGI Symbol;Acc:MGI:3652053]	2	-3.24352	0.00828318	0.0999542	40.3357	12.4385
ENSMUSG00000006651	Aplp1	amyloid beta (A4) precursor-like protein 1 [Source:MGI Symbol;Acc:MGI:88046]	7	-1.80249	0.00828466	0.0999542	35.8896	19.9067
ENSMUSG00000052613	Pcdh15	protocadherin 15 [Source:MGI Symbol;Acc:MGI:1891428]	10	-2.16611	0.00833182	0.100448	7.14532	3.29808
ENSMUSG00000040616	Tmem51	transmembrane protein 51 [Source:MGI Symbol;Acc:MGI:2384874]	4	2.13346	0.00836299	0.100749	7.74139	16.5098
ENSMUSG00000102101	Zbtb11os1	zinc finger and BTB domain containing 11, opposite strand 1 [Source:MGI Symbol;Acc:MGI:1913641]	16	3.359	0.00838398	0.100903	0.875243	2.96036
ENSMUSG00000027859	Ngf	nerve growth factor [Source:MGI Symbol;Acc:MGI:97321]	3	-4.39721	0.00838946	0.100903	73.1279	16.6301
ENSMUSG00000022365	Derl1	Der1-like domain family, member 1 [Source:MGI Symbol;Acc:MGI:1915069]	15	1.58374	0.00839451	0.100903	9.10633	14.4176
ENSMUSG00000050321	Neto1	neuropilin (NRP) and tolloid (TLL)-like 1 [Source:MGI Symbol;Acc:MGI:2180216]	18	-2.51473	0.00842515	0.101196	0.860629	0.34215
ENSMUSG00000048279	Sacs	sacsin [Source:MGI Symbol;Acc:MGI:1354724]	14	-1.79385	0.00843654	0.101257	4.13283	2.30385
ENSMUSG00000112905	Gm47477	predicted gene, 47477 [Source:MGI Symbol;Acc:MGI:6096449]	10	-2.26362	0.00848302	0.10174	2.3856	1.05108
ENSMUSG00000025019	Lcor	ligand dependent nuclear receptor corepressor [Source:MGI Symbol;Acc:MGI:2443930]	19	-1.52919	0.00852977	0.102224	8.56743	5.60174
ENSMUSG00000049630	C1ql3	C1q-like 3 [Source:MGI Symbol;Acc:MGI:2387350]	2	-1.93883	0.00854894	0.102325	6.03904	3.10722
ENSMUSG00000038067	Csf3	colony stimulating factor 3 (granulocyte) [Source:MGI Symbol;Acc:MGI:1339751]	11	3.58229	0.00855513	0.102325	8.64684	31.0218
ENSMUSG00000043300	B3galnt1	UDP-GalNAc:betaGlcNAc beta 1,3-galactosaminyltransferase, polypeptide 1 [Source:MGI Symbol;Acc:MGI:1349405]	3	1.69045	0.00856079	0.102325	5.04836	8.54136
ENSMUSG00000070407	Hs3st3b1	heparan sulfate (glucosamine) 3-O-sulfotransferase 3B1 [Source:MGI Symbol;Acc:MGI:1333853]	11	-2.00829	0.00856353	0.102325	10.8423	5.39664
ENSMUSG00000070808	Bicra	BRD4 interacting chromatin remodeling complex associated protein [Source:MGI Symbol;Acc:MGI:2154263]	7	1.57782	0.00861161	0.102824	3.0523	4.81699
ENSMUSG00000097784	A430105J06Rik	RIKEN cDNA A430105J06 gene [Source:MGI Symbol;Acc:MGI:1924439]	1	-3.14657	0.00868753	0.103654	1.78037	0.558085
ENSMUSG00000067860	Zic3	zinc finger protein of the cerebellum 3 [Source:MGI Symbol;Acc:MGI:106676]	X	4.30043	0.00872787	0.104021	0.289192	1.26196
ENSMUSG00000029086	Prom1	prominin 1 [Source:MGI Symbol;Acc:MGI:1100886]	5	-2.07133	0.00873119	0.104021	24.8038	11.9736
ENSMUSG00000000732	Icosl	icos ligand [Source:MGI Symbol;Acc:MGI:1354701]	10	2.72049	0.0087396	0.104041	0.423794	1.16248
ENSMUSG00000021730	Hcn1	hyperpolarization activated cyclic nucleotide gated potassium channel 1 [Source:MGI Symbol;Acc:MGI:1096392]	13	-2.26211	0.00874577	0.104041	14.6926	6.49465
ENSMUSG00000042485	Mustn1	musculoskeletal, embryonic nuclear protein 1 [Source:MGI Symbol;Acc:MGI:1913425]	14	-4.55446	0.00878466	0.104427	1.29345	0.283672
ENSMUSG00000043639	Rbm20	RNA binding motif protein 20 [Source:MGI Symbol;Acc:MGI:1920963]	19	1.56834	0.00884789	0.104995	6.24535	9.79979
ENSMUSG00000027883	Gpsm2	G-protein signalling modulator 2 (AGS3-like, C. elegans) [Source:MGI Symbol;Acc:MGI:1923373]	3	-2.21079	0.00885097	0.104995	44.4548	20.1051
ENSMUSG00000031822	Gse1	genetic suppressor element 1, coiled-coil protein [Source:MGI Symbol;Acc:MGI:1098275]	8	-1.50844	0.00885195	0.104995	25.5977	16.9699
ENSMUSG00000016239	Lonrf3	LON peptidase N-terminal domain and ring finger 3 [Source:MGI Symbol;Acc:MGI:1921615]	X	1.592	0.00887938	0.10515	7.89393	12.5728
ENSMUSG00000109719	Gm45266	predicted gene 45266 [Source:MGI Symbol;Acc:MGI:5791102]	8	1.99705	0.00888464	0.10515	2.59272	5.17192
ENSMUSG00000037224	Zfyve28	zinc finger, FYVE domain containing 28 [Source:MGI Symbol;Acc:MGI:2684992]	5	-2.398	0.00888874	0.10515	27.869	11.6204
ENSMUSG00000029491	Pde6b	phosphodiesterase 6B, cGMP, rod receptor, beta polypeptide [Source:MGI Symbol;Acc:MGI:97525]	5	-2.07172	0.00889101	0.10515	172.64	83.3292
ENSMUSG00000051043	Gprc5c	G protein-coupled receptor, family C, group 5, member C [Source:MGI Symbol;Acc:MGI:1917605]	11	1.8312	0.00890214	0.105188	6.36603	11.6547
ENSMUSG00000080893	Ndufa12-ps	NADH:ubiquinone oxidoreductase subunit A12, pseudogene [Source:MGI Symbol;Acc:MGI:3801934]	5	2.68859	0.0089073	0.105188	3.9156	10.6485
ENSMUSG00000097010	Gm26709	predicted gene, 26709 [Source:MGI Symbol;Acc:MGI:5477203]	12	2.70567	0.00892501	0.105296	0.974922	2.67446
ENSMUSG00000028970	Abcb1b	ATP-binding cassette, sub-family B (MDR/TAP), member 1B [Source:MGI Symbol;Acc:MGI:97568]	5	1.9166	0.0089295	0.105296	2.09347	4.01243
ENSMUSG00000040520	Manea	mannosidase, endo-alpha [Source:MGI Symbol;Acc:MGI:2444484]	4	1.68034	0.00894872	0.105446	1.7621	2.96135
ENSMUSG00000054893	Zfp667	zinc finger protein 667 [Source:MGI Symbol;Acc:MGI:2442757]	7	-2.10473	0.00899091	0.105866	2.29837	1.09135
ENSMUSG00000027615	Hps3	HPS3, biogenesis of lysosomal organelles complex 2 subunit 1 [Source:MGI Symbol;Acc:MGI:2153839]	3	-1.60494	0.00901508	0.106073	4.42931	2.75928
ENSMUSG00000034853	Acot11	acyl-CoA thioesterase 11 [Source:MGI Symbol;Acc:MGI:1913736]	4	2.14902	0.00902676	0.106126	2.91414	6.27045
ENSMUSG00000071342	Lsmem1	leucine-rich single-pass membrane protein 1 [Source:MGI Symbol;Acc:MGI:2685735]	12	2.07209	0.009036	0.106126	2.93482	6.08771
ENSMUSG00000022952	Runx1	runt related transcription factor 1 [Source:MGI Symbol;Acc:MGI:99852]	16	-2.6402	0.00903927	0.106126	12.9719	4.9132
ENSMUSG00000097419	Gm26666	predicted gene, 26666 [Source:MGI Symbol;Acc:MGI:5477160]	6	-3.87459	0.00904931	0.106167	1.51897	0.389577
ENSMUSG00000010080	Epn3	epsin 3 [Source:MGI Symbol;Acc:MGI:1919139]	11	1.85102	0.00906096	0.106226	3.90847	7.22545
ENSMUSG00000035439	Haus8	4HAUS augmin-like complex, subunit 8 [Source:MGI Symbol;Acc:MGI:1923728]	8	-1.82719	0.00908237	0.1064	5.32091	2.91265
ENSMUSG00000004651	Tyr	tyrosinase [Source:MGI Symbol;Acc:MGI:98880]	7	3.04026	0.00917931	0.107458	0.475613	1.45394
ENSMUSG00000051000	Fam160a1	family with sequence similarity 160, member A1 [Source:MGI Symbol;Acc:MGI:2444746]	3	-1.85521	0.00919377	0.107474	15.0273	8.1002
ENSMUSG00000020333	Acsl6	acyl-CoA synthetase long-chain family member 6 [Source:MGI Symbol;Acc:MGI:894291]	11	-1.90533	0.00919491	0.107474	10.2028	5.35386
ENSMUSG00000020886	Dlg4	discs large MAGUK scaffold protein 4 [Source:MGI Symbol;Acc:MGI:1277959]	11	-1.90377	0.00920524	0.107474	22.086	11.6007
ENSMUSG00000028601	Echdc2	enoyl Coenzyme A hydratase domain containing 2 [Source:MGI Symbol;Acc:MGI:1289238]	4	1.94118	0.00920733	0.107474	2.61674	5.06917
ENSMUSG00000020828	Pld2	phospholipase D2 [Source:MGI Symbol;Acc:MGI:892877]	11	1.70423	0.00924445	0.10783	1.45683	2.48732
ENSMUSG00000075028	Prdm11	PR domain containing 11 [Source:MGI Symbol;Acc:MGI:2685553]	2	1.66295	0.00925467	0.107871	1.19452	1.98725
ENSMUSG00000071648	Rom1	rod outer segment membrane protein 1 [Source:MGI Symbol;Acc:MGI:97998]	19	-1.96914	0.0092704	0.107966	194.406	98.7187
ENSMUSG00000020423	Btg2	BTG anti-proliferation factor 2 [Source:MGI Symbol;Acc:MGI:108384]	1	1.86038	0.00927622	0.107966	162.816	302.905
ENSMUSG00000005148	Klf5	Kruppel-like factor 5 [Source:MGI Symbol;Acc:MGI:1338056]	14	-2.95358	0.0093395	0.108625	4.0636	1.37507
ENSMUSG00000002227	Mov10	Mov10 RISC complex RNA helicase [Source:MGI Symbol;Acc:MGI:97054]	3	2.05419	0.00935646	0.108744	1.28288	2.62952
ENSMUSG00000027350	Chgb	chromogranin B [Source:MGI Symbol;Acc:MGI:88395]	2	-2.30892	0.00939347	0.109095	54.985	23.8102
ENSMUSG00000021226	Acot2	acyl-CoA thioesterase 2 [Source:MGI Symbol;Acc:MGI:2159605]	12	2.2304	0.00944074	0.109566	2.33127	5.2027
ENSMUSG00000020844	Nxn	nucleoredoxin [Source:MGI Symbol;Acc:MGI:109331]	11	1.68121	0.00945927	0.109702	36.0802	60.6512
ENSMUSG00000004266	Ptpn6	protein tyrosine phosphatase, non-receptor type 6 [Source:MGI Symbol;Acc:MGI:96055]	6	1.92824	0.0094837	0.109906	1.52836	2.94949
ENSMUSG00000015143	Actn1	actinin, alpha 1 [Source:MGI Symbol;Acc:MGI:2137706]	12	1.64867	0.00949273	0.109932	25.4051	41.8888
ENSMUSG00000028344	Invs	inversin [Source:MGI Symbol;Acc:MGI:1335082]	4	1.98176	0.00951842	0.11015	1.19377	2.36592
ENSMUSG00000026820	Ptges2	prostaglandin E synthase 2 [Source:MGI Symbol;Acc:MGI:1917592]	2	-1.67352	0.00955613	0.110464	3.82713	2.28658
ENSMUSG00000048027	Rgmb	repulsive guidance molecule family member B [Source:MGI Symbol;Acc:MGI:1916049]	17	1.62635	0.00955916	0.110464	3.91799	6.37038
ENSMUSG00000026986	Hnmt	histamine N-methyltransferase [Source:MGI Symbol;Acc:MGI:2153181]	2	2.82027	0.00958635	0.110699	0.773832	2.21331
ENSMUSG00000027654	Fam83d	family with sequence similarity 83, member D [Source:MGI Symbol;Acc:MGI:1919128]	2	-4.62548	0.00961862	0.110992	0.406349	0.0872558
ENSMUSG00000021123	Rdh12	retinol dehydrogenase 12 [Source:MGI Symbol;Acc:MGI:1925224]	12	-2.15898	0.00964406	0.111206	27.0624	12.529
ENSMUSG00000097440	Gm6277	predicted gene 6277 [Source:MGI Symbol;Acc:MGI:3779583]	18	-2.32794	0.00969573	0.111669	0.859593	0.368442
ENSMUSG00000046324	Ermp1	endoplasmic reticulum metallopeptidase 1 [Source:MGI Symbol;Acc:MGI:106250]	19	1.72056	0.00969803	0.111669	2.99486	5.15121
ENSMUSG00000107655	Gm44220	predicted gene, 44220 [Source:MGI Symbol;Acc:MGI:5690612]	6	3.87821	0.00971242	0.111684	0.164002	0.666566
ENSMUSG00000035954	Dock4	dedicator of cytokinesis 4 [Source:MGI Symbol;Acc:MGI:1918006]	12	1.59887	0.00971814	0.111684	0.938528	1.50198
ENSMUSG00000038764	Ptpn3	protein tyrosine phosphatase, non-receptor type 3 [Source:MGI Symbol;Acc:MGI:105307]	4	1.70597	0.0097201	0.111684	1.90122	3.23957
ENSMUSG00000024431	Nr3c1	nuclear receptor subfamily 3, group C, member 1 [Source:MGI Symbol;Acc:MGI:95824]	18	-1.64893	0.00974538	0.111895	14.6739	8.89549
ENSMUSG00000034855	Cxcl10	chemokine (C-X-C motif) ligand 10 [Source:MGI Symbol;Acc:MGI:1352450]	5	3.35051	0.00980082	0.112452	6.38376	21.3966
ENSMUSG00000001901	Kcnh6	potassium voltage-gated channel, subfamily H (eag-related), member 6 [Source:MGI Symbol;Acc:MGI:2684139]	11	-2.37978	0.00980981	0.112475	4.34294	1.82183
ENSMUSG00000008305	Tle1	transducin-like enhancer of split 1 [Source:MGI Symbol;Acc:MGI:104636]	4	1.51007	0.00984462	0.112794	4.90853	7.40915
ENSMUSG00000037523	Mavs	mitochondrial antiviral signaling protein [Source:MGI Symbol;Acc:MGI:2444773]	2	1.84385	0.00986877	0.112991	3.85761	7.10862
ENSMUSG00000041143	Tmco4	transmembrane and coiled-coil domains 4 [Source:MGI Symbol;Acc:MGI:1924306]	4	1.93803	0.00988314	0.113075	1.38131	2.67479
ENSMUSG00000037697	Ddhd1	DDHD domain containing 1 [Source:MGI Symbol;Acc:MGI:2150302]	14	-1.71893	0.0098955	0.113136	8.2501	4.79896
ENSMUSG00000106646	Gm42483	predicted gene 42483 [Source:MGI Symbol;Acc:MGI:5662620]	5	4.37313	0.00991702	0.113302	0.202197	0.890896
ENSMUSG00000031133	Arhgef6	Rac/Cdc42 guanine nucleotide exchange factor (GEF) 6 [Source:MGI Symbol;Acc:MGI:1920591]	X	1.99436	0.00993316	0.113396	0.506866	1.01367
ENSMUSG00000031994	Adamts8	a disintegrin-like and metallopeptidase (reprolysin type) with thrombospondin type 1 motif, 8 [Source:MGI Symbol;Acc:MGI:1353468]	9	2.32116	0.00993924	0.113396	0.802863	1.86421
ENSMUSG00000032714	Syde1	synapse defective 1, Rho GTPase, homolog 1 (C. elegans) [Source:MGI Symbol;Acc:MGI:1918959]	10	1.75003	0.00995228	0.113403	5.10028	8.91927
ENSMUSG00000050751	Pgbd5	piggyBac transposable element derived 5 [Source:MGI Symbol;Acc:MGI:2429955]	8	-2.28066	0.00995391	0.113403	5.88116	2.57433
ENSMUSG00000018008	Cyth4	cytohesin 4 [Source:MGI Symbol;Acc:MGI:2441702]	15	2.56468	0.00997047	0.113512	0.23684	0.613525
ENSMUSG00000037957	Wdr20	WD repeat domain 20 [Source:MGI Symbol;Acc:MGI:1916891]	12	-1.67832	0.00999161	0.113615	8.03426	4.7857
ENSMUSG00000028222	Calb1	calbindin 1 [Source:MGI Symbol;Acc:MGI:88248]	4	-2.11194	0.00999366	0.113615	1.95573	0.925696
ENSMUSG00000075478	Slitrk1	SLIT and NTRK-like family, member 1 [Source:MGI Symbol;Acc:MGI:2679446]	14	-3.61292	0.0100254	0.113896	0.57405	0.156225
ENSMUSG00000032883	Acsl3	acyl-CoA synthetase long-chain family member 3 [Source:MGI Symbol;Acc:MGI:1921455]	1	1.58969	0.0100848	0.114476	26.6918	42.4353
ENSMUSG00000051678	Pcdhb6	protocadherin beta 6 [Source:MGI Symbol;Acc:MGI:2136740]	18	2.82079	0.0100906	0.114476	0.477386	1.35957
ENSMUSG00000026721	Rabgap1l	RAB GTPase activating protein 1-like [Source:MGI Symbol;Acc:MGI:1352507]	1	-1.60149	0.0101252	0.114788	2.82457	1.76331
ENSMUSG00000097265	Gm26803	predicted gene, 26803 [Source:MGI Symbol;Acc:MGI:5477297]	13	-4.93835	0.0101394	0.114868	2.06289	0.409485
ENSMUSG00000020654	Adcy3	adenylate cyclase 3 [Source:MGI Symbol;Acc:MGI:99675]	12	1.74379	0.01015	0.114873	1.19675	2.08894
ENSMUSG00000042631	Xkr7	X-linked Kx blood group related 7 [Source:MGI Symbol;Acc:MGI:3526711]	2	-4.92091	0.010154	0.114873	2.08747	0.417624
ENSMUSG00000035258	Abi3bp	ABI family member 3 binding protein [Source:MGI Symbol;Acc:MGI:2444583]	16	1.73655	0.0101721	0.114996	24.5309	42.5953
ENSMUSG00000055322	Tns1	tensin 1 [Source:MGI Symbol;Acc:MGI:104552]	1	1.61042	0.0101939	0.115162	15.1324	24.3697
ENSMUSG00000096957	E230013L22Rik	RIKEN cDNA E230013L22 gene [Source:MGI Symbol;Acc:MGI:2142601]	8	3.62187	0.0102023	0.115177	0.795612	2.92491
ENSMUSG00000038642	Ctss	cathepsin S [Source:MGI Symbol;Acc:MGI:107341]	3	2.27073	0.0102245	0.115347	3.77136	8.60535
ENSMUSG00000028949	Smarcd3	SWI/SNF related, matrix associated, actin dependent regulator of chromatin, subfamily d, member 3 [Source:MGI Symbol;Acc:MGI:1914243]	5	1.57704	0.0102561	0.115623	4.52719	7.13596
ENSMUSG00000036391	Sec24a	Sec24 related gene family, member A (S. cerevisiae) [Source:MGI Symbol;Acc:MGI:1924621]	11	-1.48531	0.0102687	0.115684	5.30774	3.5736
ENSMUSG00000082361	Btc	betacellulin, epidermal growth factor family member [Source:MGI Symbol;Acc:MGI:99439]	5	-2.41158	0.0102838	0.115736	2.07652	0.858985
ENSMUSG00000025437	Usp33	ubiquitin specific peptidase 33 [Source:MGI Symbol;Acc:MGI:2159711]	3	-1.64922	0.0102877	0.115736	16.9827	10.2972
ENSMUSG00000029598	Plbd2	phospholipase B domain containing 2 [Source:MGI Symbol;Acc:MGI:1919022]	5	1.53606	0.0103541	0.116403	5.71986	8.79054
ENSMUSG00000021065	Fut8	fucosyltransferase 8 [Source:MGI Symbol;Acc:MGI:1858901]	12	1.60975	0.0103662	0.116458	2.66836	4.29224
ENSMUSG00000111334	Gm30015	predicted gene, 30015 [Source:MGI Symbol;Acc:MGI:5589174]	9	-3.75517	0.010398	0.116733	0.495345	0.128269
ENSMUSG00000108790	Gm44806	predicted gene 44806 [Source:MGI Symbol;Acc:MGI:5753382]	7	2.18249	0.0104619	0.117292	0.824901	1.80776
ENSMUSG00000031853	Map3k21	mitogen-activated protein kinase kinase kinase 21 [Source:MGI Symbol;Acc:MGI:2385307]	8	2.26464	0.0104622	0.117292	1.51096	3.42434
ENSMUSG00000030125	Lrrc23	leucine rich repeat containing 23 [Source:MGI Symbol;Acc:MGI:1315192]	6	3.39421	0.0104731	0.117333	0.625237	2.14579
ENSMUSG00000021647	Cartpt	CART prepropeptide [Source:MGI Symbol;Acc:MGI:1351330]	13	-2.49239	0.0105022	0.117577	8.13809	3.25741
ENSMUSG00000022738	Gsc2	goosecoid homebox 2 [Source:MGI Symbol;Acc:MGI:892006]	16	-5.52624	0.010565	0.118135	2.45111	0.427669
ENSMUSG00000041920	Slc16a6	solute carrier family 16 (monocarboxylic acid transporters), member 6 [Source:MGI Symbol;Acc:MGI:2144585]	11	-2.04391	0.0105667	0.118135	12.3974	6.0641
ENSMUSG00000016128	Stard13	StAR-related lipid transfer (START) domain containing 13 [Source:MGI Symbol;Acc:MGI:2385331]	5	-2.55912	0.010604	0.118471	8.77396	3.4283
ENSMUSG00000032766	Gng11	guanine nucleotide binding protein (G protein), gamma 11 [Source:MGI Symbol;Acc:MGI:1913316]	6	1.96872	0.0106169	0.118532	6.23739	12.2467
ENSMUSG00000045038	Prkce	protein kinase C, epsilon [Source:MGI Symbol;Acc:MGI:97599]	17	-1.50291	0.010681	0.119117	20.1491	13.4042
ENSMUSG00000054967	Zfp647	zinc finger protein 647 [Source:MGI Symbol;Acc:MGI:3052806]	15	-2.15214	0.010684	0.119117	2.45123	1.13982
ENSMUSG00000038147	Cd84	CD84 antigen [Source:MGI Symbol;Acc:MGI:1336885]	1	4.0164	0.0106933	0.119139	0.0676669	0.279654
ENSMUSG00000030443	Zfp583	zinc finger protein 583 [Source:MGI Symbol;Acc:MGI:2682297]	7	-2.9295	0.0107366	0.119538	0.827765	0.281129
ENSMUSG00000037321	Tap1	transporter 1, ATP-binding cassette, sub-family B (MDR/TAP) [Source:MGI Symbol;Acc:MGI:98483]	17	2.03761	0.0107619	0.119705	1.7004	3.46649
ENSMUSG00000071652	Ints5	integrator complex subunit 5 [Source:MGI Symbol;Acc:MGI:1923578]	19	-1.97516	0.0107664	0.119705	4.31245	2.18494
ENSMUSG00000036904	Fzd8	frizzled class receptor 8 [Source:MGI Symbol;Acc:MGI:108460]	18	2.05767	0.0108435	0.120479	1.60378	3.29583
ENSMUSG00000084835	Gm12352	predicted gene 12352 [Source:MGI Symbol;Acc:MGI:3705172]	11	4.4915	0.0108529	0.120501	0.599529	2.69473
ENSMUSG00000109899	Gm6012	predicted gene 6012 [Source:MGI Symbol;Acc:MGI:3644785]	8	-5.16016	0.0108669	0.120574	2.94081	0.570407
ENSMUSG00000029816	Gpnmb	glycoprotein (transmembrane) nmb [Source:MGI Symbol;Acc:MGI:1934765]	6	2.27389	0.0108793	0.120628	5.32157	12.107
ENSMUSG00000105691	Gm42876	predicted gene 42876 [Source:MGI Symbol;Acc:MGI:5663013]	3	-2.98642	0.0109403	0.121177	0.737408	0.244976
ENSMUSG00000018428	Akap1	A kinase (PRKA) anchor protein 1 [Source:MGI Symbol;Acc:MGI:104729]	11	-1.79738	0.0109439	0.121177	9.42832	5.24373
ENSMUSG00000015401	Cltrn	collectrin, amino acid transport regulator [Source:MGI Symbol;Acc:MGI:1926234]	X	3.47789	0.0109617	0.121292	0.445781	1.58698
ENSMUSG00000113998	Gm40909	predicted gene, 40909 [Source:MGI Symbol;Acc:MGI:5623794]	13	-4.12479	0.0109715	0.121317	0.319449	0.0760774
ENSMUSG00000021239	Vsx2	visual system homeobox 2 [Source:MGI Symbol;Acc:MGI:88401]	12	1.86287	0.010987	0.121405	17.1361	31.9373
ENSMUSG00000046613	Vwa5b2	von Willebrand factor A domain containing 5B2 [Source:MGI Symbol;Acc:MGI:2681859]	16	-2.35082	0.0110127	0.121598	0.463941	0.196844
ENSMUSG00000070031	Sp140	Sp140 nuclear body protein [Source:MGI Symbol;Acc:MGI:3702467]	1	4.51702	0.0110195	0.121598	0.0799003	0.381692
ENSMUSG00000029093	Sorcs2	sortilin-related VPS10 domain containing receptor 2 [Source:MGI Symbol;Acc:MGI:1932289]	5	-1.70167	0.0110392	0.121733	6.76652	3.97862
ENSMUSG00000062300	Nectin2	nectin cell adhesion molecule 2 [Source:MGI Symbol;Acc:MGI:97822]	7	1.63808	0.0110516	0.121738	8.75813	14.341
ENSMUSG00000022453	Naga	N-acetyl galactosaminidase, alpha [Source:MGI Symbol;Acc:MGI:1261422]	15	1.58988	0.0110629	0.121738	8.07893	12.8377
ENSMUSG00000094832	Gm21846	predicted gene, 21846 [Source:MGI Symbol;Acc:MGI:5434010]	5	-2.18217	0.0110675	0.121738	2.60326	1.1873
ENSMUSG00000038515	Grtp1	GH regulated TBC protein 1 [Source:MGI Symbol;Acc:MGI:1914040]	8	-1.83137	0.0110698	0.121738	11.0117	6.00952
ENSMUSG00000036192	Rorb	RAR-related orphan receptor beta [Source:MGI Symbol;Acc:MGI:1343464]	19	-1.96424	0.0111142	0.122079	13.1885	6.71291
ENSMUSG00000021994	Wnt5a	wingless-type MMTV integration site family, member 5A [Source:MGI Symbol;Acc:MGI:98958]	14	1.8323	0.0111159	0.122079	1.87099	3.42586
ENSMUSG00000034614	Pik3ip1	phosphoinositide-3-kinase interacting protein 1 [Source:MGI Symbol;Acc:MGI:1917016]	11	1.84625	0.0111268	0.122116	1.37011	2.53266
ENSMUSG00000066760	Psg16	pregnancy specific glycoprotein 16 [Source:MGI Symbol;Acc:MGI:1347249]	7	-2.97602	0.0111515	0.122262	0.992427	0.334066
ENSMUSG00000043290	Zfp784	zinc finger protein 784 [Source:MGI Symbol;Acc:MGI:3606042]	7	-2.59693	0.0111623	0.122262	1.39626	0.539519
ENSMUSG00000009614	Sardh	sarcosine dehydrogenase [Source:MGI Symbol;Acc:MGI:2183102]	2	1.75256	0.0111714	0.122262	3.09265	5.41659
ENSMUSG00000017897	Eya2	EYA transcriptional coactivator and phosphatase 2 [Source:MGI Symbol;Acc:MGI:109341]	2	2.66046	0.0111864	0.122262	0.607967	1.6304
ENSMUSG00000063145	Bbs5	Bardet-Biedl syndrome 5 (human) [Source:MGI Symbol;Acc:MGI:1919819]	2	-2.30362	0.0111872	0.122262	9.6872	4.20212
ENSMUSG00000037573	Tob1	transducer of ErbB-2.1 [Source:MGI Symbol;Acc:MGI:1349721]	11	1.67471	0.0111881	0.122262	62.2574	104.269
ENSMUSG00000034463	Scara3	scavenger receptor class A, member 3 [Source:MGI Symbol;Acc:MGI:2444418]	14	1.72226	0.0111932	0.122262	4.66857	8.05571
ENSMUSG00000018819	Lsp1	lymphocyte specific 1 [Source:MGI Symbol;Acc:MGI:96832]	7	2.64869	0.0112467	0.122763	0.362065	0.969674
ENSMUSG00000015619	Gata3	GATA binding protein 3 [Source:MGI Symbol;Acc:MGI:95663]	2	2.68979	0.0112676	0.122781	0.850217	2.28721
ENSMUSG00000024866	Acy3	aspartoacylase (aminoacylase) 3 [Source:MGI Symbol;Acc:MGI:1918920]	19	2.70373	0.0112695	0.122781	0.3511	0.95396
ENSMUSG00000005677	Nr1i3	nuclear receptor subfamily 1, group I, member 3 [Source:MGI Symbol;Acc:MGI:1346307]	1	4.30617	0.0112711	0.122781	0.0743686	0.319025
ENSMUSG00000027792	Bche	butyrylcholinesterase [Source:MGI Symbol;Acc:MGI:894278]	3	1.91902	0.0113084	0.123104	2.21841	4.2542
ENSMUSG00000103238	Gm36527	predicted gene, 36527 [Source:MGI Symbol;Acc:MGI:5595686]	1	-2.15968	0.0113348	0.123156	1.45985	0.674068
ENSMUSG00000028950	Tas1r1	taste receptor, type 1, member 1 [Source:MGI Symbol;Acc:MGI:1927505]	4	3.65829	0.0113357	0.123156	0.120942	0.448139
ENSMUSG00000079550	Mpp4	membrane protein, palmitoylated 4 (MAGUK p55 subfamily member 4) [Source:MGI Symbol;Acc:MGI:2386681]	1	-2.15744	0.011336	0.123156	24.0467	11.1436
ENSMUSG00000044501	Zfp758	zinc finger protein 758 [Source:MGI Symbol;Acc:MGI:2385044]	17	1.7917	0.011363	0.123366	1.97268	3.54109
ENSMUSG00000029330	Cds1	CDP-diacylglycerol synthase 1 [Source:MGI Symbol;Acc:MGI:1921846]	5	-1.94064	0.0113762	0.123427	23.7639	12.2429
ENSMUSG00000023495	Pcbp4	poly(rC) binding protein 4 [Source:MGI Symbol;Acc:MGI:1890471]	9	-1.75113	0.0114081	0.123639	30.4701	17.3995
ENSMUSG00000034796	Cpne7	copine VII [Source:MGI Symbol;Acc:MGI:2142747]	8	-2.75132	0.0114111	0.123639	1.28707	0.465443
ENSMUSG00000064945	Rny3	RNA, Y3 small cytoplasmic (associated with Ro protein) [Source:MGI Symbol;Acc:MGI:107304]	6	-2.57702	0.0114308	0.12377	29.2613	11.3253
ENSMUSG00000000901	Mmp11	matrix metallopeptidase 11 [Source:MGI Symbol;Acc:MGI:97008]	10	2.36031	0.0114564	0.123964	0.77653	1.84949
ENSMUSG00000057777	Mab21l2	mab-21-like 2 [Source:MGI Symbol;Acc:MGI:1346022]	3	2.01965	0.011503	0.124385	8.81197	17.8122
ENSMUSG00000021983	Atp8a2	ATPase, aminophospholipid transporter-like, class I, type 8A, member 2 [Source:MGI Symbol;Acc:MGI:1354710]	14	-2.09154	0.0115453	0.124759	10.2139	4.88267
ENSMUSG00000116665	E130310I04Rik	RIKEN cDNA E130310I04 gene [Source:MGI Symbol;Acc:MGI:3046461]	16	-2.6314	0.0115928	0.125188	3.88991	1.47394
ENSMUSG00000103047	Gm37310	predicted gene, 37310 [Source:MGI Symbol;Acc:MGI:5610538]	15	3.19607	0.0116141	0.125335	0.428667	1.38964
ENSMUSG00000069662	Marcks	myristoylated alanine rich protein kinase C substrate [Source:MGI Symbol;Acc:MGI:96907]	10	1.51383	0.0116322	0.125399	15.5519	23.5479
ENSMUSG00000047181	Samd14	sterile alpha motif domain containing 14 [Source:MGI Symbol;Acc:MGI:2384945]	11	1.49664	0.0116356	0.125399	23.2371	34.7865
ENSMUSG00000051236	Msrb3	methionine sulfoxide reductase B3 [Source:MGI Symbol;Acc:MGI:2443538]	10	1.6784	0.0116918	0.12592	12.3401	20.7063
ENSMUSG00000037982	Gm9725	predicted gene 9725 [Source:MGI Symbol;Acc:MGI:3646552]	8	-3.6432	0.0117644	0.126618	0.735392	0.198913
ENSMUSG00000022490	Ppp1r1a	protein phosphatase 1, regulatory inhibitor subunit 1A [Source:MGI Symbol;Acc:MGI:1889595]	15	1.60962	0.0118012	0.126916	36.0775	58.0548
ENSMUSG00000009394	Syn2	synapsin II [Source:MGI Symbol;Acc:MGI:103020]	6	-1.75238	0.0118078	0.126916	1.53507	0.874044
ENSMUSG00000079235	Ccdc13	coiled-coil domain containing 13 [Source:MGI Symbol;Acc:MGI:1920144]	9	2.94944	0.0118351	0.12706	0.155083	0.460566
ENSMUSG00000040466	Blvrb	biliverdin reductase B (flavin reductase (NADPH)) [Source:MGI Symbol;Acc:MGI:2385271]	7	2.4657	0.0118413	0.12706	0.535358	1.33296
ENSMUSG00000042256	Ptchd4	patched domain containing 4 [Source:MGI Symbol;Acc:MGI:1920485]	17	2.38111	0.0118448	0.12706	0.382402	0.919663
ENSMUSG00000039851	4932438H23Rik	RIKEN cDNA 4932438H23 gene [Source:MGI Symbol;Acc:MGI:1921637]	16	2.54088	0.0118528	0.127062	0.609387	1.56556
ENSMUSG00000023827	Agpat4	1-acylglycerol-3-phosphate O-acyltransferase 4 (lysophosphatidic acid acyltransferase, delta) [Source:MGI Symbol;Acc:MGI:1915512]	17	2.19996	0.0118919	0.127397	2.04168	4.50426
ENSMUSG00000026980	Ly75	lymphocyte antigen 75 [Source:MGI Symbol;Acc:MGI:106662]	2	1.70903	0.011913	0.127459	1.38512	2.36772
ENSMUSG00000005534	Insr	insulin receptor [Source:MGI Symbol;Acc:MGI:96575]	8	1.46427	0.0119135	0.127459	6.67792	9.77924
ENSMUSG00000007739	Cct4	chaperonin containing Tcp1, subunit 4 (delta) [Source:MGI Symbol;Acc:MGI:104689]	11	-1.54595	0.0119371	0.127626	14.4115	9.32205
ENSMUSG00000038178	Slc43a2	solute carrier family 43, member 2 [Source:MGI Symbol;Acc:MGI:2442746]	11	-1.52613	0.0120134	0.128357	4.33461	2.84235
ENSMUSG00000113836	Gm3325	predicted gene 3325 [Source:MGI Symbol;Acc:MGI:3781503]	13	3.1689	0.0120337	0.12849	0.413778	1.32738
ENSMUSG00000020673	Tpo	thyroid peroxidase [Source:MGI Symbol;Acc:MGI:98813]	12	-2.62368	0.0120466	0.128542	1.29634	0.491873
ENSMUSG00000044022	Pcdhb21	protocadherin beta 21 [Source:MGI Symbol;Acc:MGI:2136759]	18	1.8767	0.0120773	0.128785	1.15501	2.17435
ENSMUSG00000001120	Pcbp3	poly(rC) binding protein 3 [Source:MGI Symbol;Acc:MGI:1890470]	10	-1.67268	0.0121164	0.129116	65.947	39.4252
ENSMUSG00000052949	Rnf157	ring finger protein 157 [Source:MGI Symbol;Acc:MGI:2442484]	11	-2.047	0.0121442	0.129328	10.0236	4.89483
ENSMUSG00000003949	Hlf	hepatic leukemia factor [Source:MGI Symbol;Acc:MGI:96108]	11	1.47504	0.0121668	0.129483	15.2205	22.454
ENSMUSG00000047557	Lxn	latexin [Source:MGI Symbol;Acc:MGI:107633]	3	2.95679	0.0121812	0.12955	0.653096	1.9288
ENSMUSG00000041189	Chrnb1	cholinergic receptor, nicotinic, beta polypeptide 1 (muscle) [Source:MGI Symbol;Acc:MGI:87890]	11	1.74583	0.0122037	0.129704	7.64491	13.3501
ENSMUSG00000031328	Flna	filamin, alpha [Source:MGI Symbol;Acc:MGI:95556]	X	1.5969	0.0122623	0.130159	43.0736	68.7848
ENSMUSG00000074151	Nlrc5	NLR family, CARD domain containing 5 [Source:MGI Symbol;Acc:MGI:3612191]	8	2.32372	0.0122626	0.130159	0.966525	2.25071
ENSMUSG00000033174	Mgll	monoglyceride lipase [Source:MGI Symbol;Acc:MGI:1346042]	6	1.85143	0.0123046	0.13052	7.128	13.207
ENSMUSG00000041268	Dmxl2	Dmx-like 2 [Source:MGI Symbol;Acc:MGI:2444630]	9	-1.7486	0.0123239	0.13053	19.8158	11.3317
ENSMUSG00000044583	Tlr7	toll-like receptor 7 [Source:MGI Symbol;Acc:MGI:2176882]	X	4.00853	0.0123282	0.13053	0.102198	0.412298
ENSMUSG00000039375	Wdr17	WD repeat domain 17 [Source:MGI Symbol;Acc:MGI:1924662]	8	-2.11949	0.0123361	0.13053	14.6705	6.91911
ENSMUSG00000058173	Smco4	single-pass membrane protein with coiled-coil domains 4 [Source:MGI Symbol;Acc:MGI:3039636]	9	2.32889	0.0123379	0.13053	1.75647	4.08173
ENSMUSG00000007030	Vwa7	von Willebrand factor A domain containing 7 [Source:MGI Symbol;Acc:MGI:1306798]	17	1.91344	0.0123509	0.130581	1.23792	2.36649
ENSMUSG00000023978	Prph2	peripherin 2 [Source:MGI Symbol;Acc:MGI:102791]	17	-2.08352	0.0123848	0.130855	273.842	131.429
ENSMUSG00000042549	Map2k3os	mitogen-activated protein kinase kinase 3, opposite strand [Source:MGI Symbol;Acc:MGI:1344334]	11	2.1386	0.0124146	0.131083	4.17334	8.92696
ENSMUSG00000104965	Gm43437	predicted gene 43437 [Source:MGI Symbol;Acc:MGI:5663574]	3	-4.47344	0.0124349	0.131212	0.562058	0.121101
ENSMUSG00000031517	Gpm6a	glycoprotein m6a [Source:MGI Symbol;Acc:MGI:107671]	8	1.88564	0.0124616	0.131408	20.2277	38.1586
ENSMUSG00000097587	4930578M01Rik	RIKEN cDNA 4930578M01 gene [Source:MGI Symbol;Acc:MGI:1923201]	15	2.00504	0.0124828	0.131469	0.776513	1.5642
ENSMUSG00000020866	Cacna1g	calcium channel, voltage-dependent, T type, alpha 1G subunit [Source:MGI Symbol;Acc:MGI:1201678]	11	1.93823	0.0124923	0.131469	5.29632	10.2701
ENSMUSG00000045179	Sox3	SRY (sex determining region Y)-box 3 [Source:MGI Symbol;Acc:MGI:98365]	X	2.61492	0.0124953	0.131469	0.575891	1.51298
ENSMUSG00000054277	Arfgap3	ADP-ribosylation factor GTPase activating protein 3 [Source:MGI Symbol;Acc:MGI:1913501]	15	1.65773	0.0124999	0.131469	3.20053	5.30091
ENSMUSG00000056973	Ces1d	carboxylesterase 1D [Source:MGI Symbol;Acc:MGI:2148202]	8	4.29954	0.0125645	0.132037	0.96732	4.1933
ENSMUSG00000053219	Raet1e	retinoic acid early transcript 1E [Source:MGI Symbol;Acc:MGI:2675273]	10	5.7272	0.0125703	0.132037	0.123921	0.708394
ENSMUSG00000027510	Rbm38	RNA binding motif protein 38 [Source:MGI Symbol;Acc:MGI:1889294]	2	-1.95869	0.0126197	0.13247	7.66232	3.91184
ENSMUSG00000047090	Tmem198b	transmembrane protein 198b [Source:MGI Symbol;Acc:MGI:1921077]	10	1.75941	0.0126404	0.132571	3.33385	5.86335
ENSMUSG00000030522	Mtmr10	myotubularin related protein 10 [Source:MGI Symbol;Acc:MGI:2142292]	7	-2.18634	0.0126457	0.132571	28.6649	13.1108
ENSMUSG00000041193	Pla2g5	phospholipase A2, group V [Source:MGI Symbol;Acc:MGI:101899]	4	1.48293	0.0127066	0.133123	25.8964	38.3959
ENSMUSG00000058743	Kcnj14	potassium inwardly-rectifying channel, subfamily J, member 14 [Source:MGI Symbol;Acc:MGI:2384820]	7	-1.89852	0.0127631	0.133628	44.7412	23.5615
ENSMUSG00000063458	Lrmda	leucine rich melanocyte differentiation associated [Source:MGI Symbol;Acc:MGI:1923883]	14	2.59816	0.0127901	0.133746	0.40793	1.05934
ENSMUSG00000073805	Insyn2a	inhibitory synaptic factor 2A [Source:MGI Symbol;Acc:MGI:3605068]	7	-1.78284	0.0127909	0.133746	2.73596	1.53444
ENSMUSG00000022106	Rcbtb2	regulator of chromosome condensation (RCC1) and BTB (POZ) domain containing protein 2 [Source:MGI Symbol;Acc:MGI:1917200]	14	1.67339	0.0128186	0.133926	1.61665	2.70581
ENSMUSG00000019082	Slc25a22	solute carrier family 25 (mitochondrial carrier, glutamate), member 22 [Source:MGI Symbol;Acc:MGI:1915517]	7	-1.86261	0.0128247	0.133926	6.97153	3.74131
ENSMUSG00000024713	Pcsk5	proprotein convertase subtilisin/kexin type 5 [Source:MGI Symbol;Acc:MGI:97515]	19	1.60068	0.0128584	0.134191	1.29982	2.07803
ENSMUSG00000006007	Pdc	phosducin [Source:MGI Symbol;Acc:MGI:98090]	1	-1.96189	0.0129402	0.134957	120.525	61.4294
ENSMUSG00000022021	Diaph3	diaphanous related formin 3 [Source:MGI Symbol;Acc:MGI:1927222]	14	-2.0652	0.0129645	0.135124	8.59143	4.15797
ENSMUSG00000017718	Afmid	arylformamidase [Source:MGI Symbol;Acc:MGI:2448704]	11	2.43882	0.0129925	0.135328	0.579038	1.41131
ENSMUSG00000110393	Gm36445	predicted gene, 36445 [Source:MGI Symbol;Acc:MGI:5595604]	13	-2.31493	0.0130158	0.135483	1.77465	0.762593
ENSMUSG00000038860	Garnl3	GTPase activating RANGAP domain-like 3 [Source:MGI Symbol;Acc:MGI:2139309]	2	1.77742	0.0130333	0.135579	0.547698	0.971738
ENSMUSG00000032262	Elovl4	elongation of very long chain fatty acids (FEN1/Elo2, SUR4/Elo3, yeast)-like 4 [Source:MGI Symbol;Acc:MGI:1933331]	9	-1.82164	0.0130615	0.135783	40.7053	22.3434
ENSMUSG00000029334	Prkg2	protein kinase, cGMP-dependent, type II [Source:MGI Symbol;Acc:MGI:108173]	5	-4.99214	0.0130698	0.135783	0.492229	0.0958783
ENSMUSG00000021501	Caml	calcium modulating ligand [Source:MGI Symbol;Acc:MGI:104728]	13	-1.54883	0.0131004	0.136014	15.5461	10.0432
ENSMUSG00000031399	Fam3a	family with sequence similarity 3, member A [Source:MGI Symbol;Acc:MGI:1913544]	X	1.55483	0.0131255	0.136101	5.29661	8.23883
ENSMUSG00000020599	Rgs9	regulator of G-protein signaling 9 [Source:MGI Symbol;Acc:MGI:1338824]	11	-1.91667	0.0131257	0.136101	48.1466	25.1184
ENSMUSG00000018916	Csf2	colony stimulating factor 2 (granulocyte-macrophage) [Source:MGI Symbol;Acc:MGI:1339752]	11	-4.61368	0.0131352	0.136113	6.50337	1.39804
ENSMUSG00000053693	Mast1	microtubule associated serine/threonine kinase 1 [Source:MGI Symbol;Acc:MGI:1861901]	8	-2.16236	0.0131479	0.136156	7.59388	3.50909
ENSMUSG00000056895	H2bu2	H2B.U histone 2 [Source:MGI Symbol;Acc:MGI:1925553]	11	-2.40347	0.0131961	0.136568	10.536	4.39268
ENSMUSG00000023947	Nfkbie	nuclear factor of kappa light polypeptide gene enhancer in B cells inhibitor, epsilon [Source:MGI Symbol;Acc:MGI:1194908]	17	1.63926	0.0132237	0.136763	9.02509	14.7927
ENSMUSG00000102705	4632432E15Rik	RIKEN cDNA 4632432E15 gene [Source:MGI Symbol;Acc:MGI:1921296]	3	-2.39933	0.0132319	0.136763	4.26336	1.76866
ENSMUSG00000030110	Ret	ret proto-oncogene [Source:MGI Symbol;Acc:MGI:97902]	6	-2.53308	0.0132449	0.13681	2.71342	1.06914
ENSMUSG00000025591	Tma16	translation machinery associated 16 [Source:MGI Symbol;Acc:MGI:1913532]	8	-1.66286	0.0132571	0.136848	2.62836	1.58016
ENSMUSG00000007036	Abhd16a	abhydrolase domain containing 16A [Source:MGI Symbol;Acc:MGI:99476]	17	1.48195	0.0132695	0.136889	10.0509	14.9028
ENSMUSG00000002957	Ap2a2	adaptor-related protein complex 2, alpha 2 subunit [Source:MGI Symbol;Acc:MGI:101920]	7	-1.60443	0.0132861	0.136973	41.7434	26.0191
ENSMUSG00000022580	Rhpn1	rhophilin, Rho GTPase binding protein 1 [Source:MGI Symbol;Acc:MGI:1098783]	15	-1.81853	0.0133564	0.137449	5.28059	2.90022
ENSMUSG00000042961	Egflam	EGF-like, fibronectin type III and laminin G domains [Source:MGI Symbol;Acc:MGI:2146149]	15	-1.95247	0.0133578	0.137449	14.2603	7.30239
ENSMUSG00000052928	Ctif	CBP80/20-dependent translation initiation factor [Source:MGI Symbol;Acc:MGI:2685518]	18	-1.62176	0.0133578	0.137449	12.8544	7.92868
ENSMUSG00000026787	Gad2	glutamic acid decarboxylase 2 [Source:MGI Symbol;Acc:MGI:95634]	2	-2.43464	0.0133889	0.137682	3.42843	1.4071
ENSMUSG00000091971	Hspa1a	heat shock protein 1A [Source:MGI Symbol;Acc:MGI:96244]	17	1.70868	0.0134155	0.137867	13.5663	23.1939
ENSMUSG00000028524	Sgip1	SH3-domain GRB2-like (endophilin) interacting protein 1 [Source:MGI Symbol;Acc:MGI:1920344]	4	-2.0466	0.0134758	0.138399	14.868	7.26352
ENSMUSG00000027555	Car13	carbonic anhydrase 13 [Source:MGI Symbol;Acc:MGI:1931322]	3	2.71614	0.0134877	0.138404	0.307924	0.849589
ENSMUSG00000041460	Cacna2d4	calcium channel, voltage-dependent, alpha 2/delta subunit 4 [Source:MGI Symbol;Acc:MGI:2442632]	6	-2.07519	0.0134935	0.138404	28.9339	13.9419
ENSMUSG00000098112	Bin2	bridging integrator 2 [Source:MGI Symbol;Acc:MGI:3611448]	15	3.38229	0.0135515	0.138912	0.253908	0.877157
ENSMUSG00000026471	Mr1	major histocompatibility complex, class I-related [Source:MGI Symbol;Acc:MGI:1195463]	1	1.97503	0.0135857	0.139174	1.45094	2.86117
ENSMUSG00000087366	Junos	jun proto-oncogene, opposite strand [Source:MGI Symbol;Acc:MGI:2652837]	4	2.3923	0.0135971	0.139203	0.338085	0.811694
ENSMUSG00000103469	Gm9910	predicted gene 9910 [Source:MGI Symbol;Acc:MGI:3642577]	11	5.29613	0.0136083	0.139228	0.109233	0.64178
ENSMUSG00000035671	Zswim4	zinc finger SWIM-type containing 4 [Source:MGI Symbol;Acc:MGI:2443726]	8	-1.88039	0.0136438	0.139422	25.7353	13.6869
ENSMUSG00000030824	Nucb1	nucleobindin 1 [Source:MGI Symbol;Acc:MGI:97388]	7	1.48846	0.0136444	0.139422	13.2862	19.775
ENSMUSG00000013584	Aldh1a2	aldehyde dehydrogenase family 1, subfamily A2 [Source:MGI Symbol;Acc:MGI:107928]	9	5.18123	0.0137107	0.14001	0.227747	1.22644
ENSMUSG00000034452	Slc24a1	solute carrier family 24 (sodium/potassium/calcium exchanger), member 1 [Source:MGI Symbol;Acc:MGI:2384871]	9	-2.05819	0.0137533	0.140357	114.465	55.6122
ENSMUSG00000057880	Abat	4-aminobutyrate aminotransferase [Source:MGI Symbol;Acc:MGI:2443582]	16	1.48454	0.013797	0.140557	13.2731	19.7029
ENSMUSG00000024030	Abcg1	ATP binding cassette subfamily G member 1 [Source:MGI Symbol;Acc:MGI:107704]	17	-1.71754	0.0138013	0.140557	7.71122	4.48895
ENSMUSG00000032788	Pdxk	pyridoxal (pyridoxine, vitamin B6) kinase [Source:MGI Symbol;Acc:MGI:1351869]	10	1.82762	0.0138061	0.140557	8.55743	15.649
ENSMUSG00000020926	Adam11	a disintegrin and metallopeptidase domain 11 [Source:MGI Symbol;Acc:MGI:1098667]	11	1.60518	0.013812	0.140557	7.27383	11.6796
ENSMUSG00000020212	Mdm1	transformed mouse 3T3 cell double minute 1 [Source:MGI Symbol;Acc:MGI:96951]	10	-1.92945	0.0138164	0.140557	13.8394	7.16965
ENSMUSG00000027457	Snph	syntaphilin [Source:MGI Symbol;Acc:MGI:2139270]	2	-1.85798	0.0138462	0.140704	3.31672	1.78341
ENSMUSG00000032292	Nr2e3	nuclear receptor subfamily 2, group E, member 3 [Source:MGI Symbol;Acc:MGI:1346317]	9	-2.00499	0.0138483	0.140704	55.0554	27.4567
ENSMUSG00000036510	Cdh8	cadherin 8 [Source:MGI Symbol;Acc:MGI:107434]	8	-2.69879	0.0138624	0.140759	1.07447	0.396303
ENSMUSG00000042349	Ikbke	inhibitor of kappaB kinase epsilon [Source:MGI Symbol;Acc:MGI:1929612]	1	2.36854	0.0138888	0.140938	0.25294	0.598315
ENSMUSG00000089842	Pitpnm2os2	phosphatidylinositol transfer protein, membrane-associated 2, opposite strand 2 [Source:MGI Symbol;Acc:MGI:3840147]	5	-2.16874	0.0139253	0.14115	3.311	1.5225
ENSMUSG00000026904	Slc4a10	solute carrier family 4, sodium bicarbonate cotransporter-like, member 10 [Source:MGI Symbol;Acc:MGI:2150150]	2	-2.20724	0.0139271	0.14115	6.95518	3.14905
ENSMUSG00000015133	Lrrk1	leucine-rich repeat kinase 1 [Source:MGI Symbol;Acc:MGI:2142227]	7	1.87526	0.0139476	0.141233	1.37529	2.57919
ENSMUSG00000005583	Mef2c	myocyte enhancer factor 2C [Source:MGI Symbol;Acc:MGI:99458]	13	-1.98698	0.0139528	0.141233	4.00406	2.01428
ENSMUSG00000027656	Ccn5	cellular communication network factor 5 [Source:MGI Symbol;Acc:MGI:1328326]	2	3.97661	0.0139908	0.141528	0.305731	1.23637
ENSMUSG00000044876	Zfp444	zinc finger protein 444 [Source:MGI Symbol;Acc:MGI:1923365]	7	-1.7056	0.0140058	0.141592	10.0856	5.91229
ENSMUSG00000004530	Coro1c	coronin, actin binding protein 1C [Source:MGI Symbol;Acc:MGI:1345964]	5	-1.61522	0.0140361	0.141753	11.2609	6.97121
ENSMUSG00000006335	Tfpt	TCF3 (E2A) fusion partner [Source:MGI Symbol;Acc:MGI:1916964]	7	-1.76197	0.0140393	0.141753	8.72411	4.94781
ENSMUSG00000041578	Crx	cone-rod homeobox [Source:MGI Symbol;Acc:MGI:1194883]	7	-2.09625	0.0141013	0.14229	105.998	50.5605
ENSMUSG00000038702	Dsel	dermatan sulfate epimerase-like [Source:MGI Symbol;Acc:MGI:2442948]	1	2.12567	0.0141177	0.142367	0.845971	1.80878
ENSMUSG00000026669	Mcm10	minichromosome maintenance 10 replication initiation factor [Source:MGI Symbol;Acc:MGI:1917274]	2	-1.76468	0.0142517	0.143526	1.4336	0.812928
ENSMUSG00000033610	Pank1	pantothenate kinase 1 [Source:MGI Symbol;Acc:MGI:1922985]	19	2.00905	0.0142551	0.143526	1.11419	2.23532
ENSMUSG00000034845	Plvap	plasmalemma vesicle associated protein [Source:MGI Symbol;Acc:MGI:1890497]	8	2.57656	0.0142593	0.143526	0.986699	2.57447
ENSMUSG00000108912	E230020D15Rik	RIKEN cDNA E230020D15 gene [Source:MGI Symbol;Acc:MGI:2442650]	8	1.96439	0.0143162	0.143849	0.869421	1.70679
ENSMUSG00000060703	Cd302	CD302 antigen [Source:MGI Symbol;Acc:MGI:1913455]	2	1.80675	0.0143181	0.143849	3.25567	5.89405
ENSMUSG00000024992	Pde6c	phosphodiesterase 6C, cGMP specific, cone, alpha prime [Source:MGI Symbol;Acc:MGI:105956]	19	-2.29351	0.0143235	0.143849	13.7608	5.99389
ENSMUSG00000026971	Itgb6	integrin beta 6 [Source:MGI Symbol;Acc:MGI:96615]	2	4.76626	0.014327	0.143849	0.0461627	0.221238
ENSMUSG00000006219	Fblim1	filamin binding LIM protein 1 [Source:MGI Symbol;Acc:MGI:1921452]	4	2.64408	0.014376	0.144228	0.405923	1.08494
ENSMUSG00000038418	Egr1	early growth response 1 [Source:MGI Symbol;Acc:MGI:95295]	18	1.699	0.0143827	0.144228	367.014	623.558
ENSMUSG00000034235	Usp54	ubiquitin specific peptidase 54 [Source:MGI Symbol;Acc:MGI:1926037]	14	1.44847	0.0143939	0.144251	5.91302	8.56651
ENSMUSG00000038838	Vars2	valyl-tRNA synthetase 2, mitochondrial [Source:MGI Symbol;Acc:MGI:1916165]	17	1.60621	0.0144049	0.144272	2.48853	4.00561
ENSMUSG00000006356	Crip2	cysteine rich protein 2 [Source:MGI Symbol;Acc:MGI:1915587]	12	1.63737	0.0144338	0.144472	7.30563	11.9697
ENSMUSG00000033767	Tmem131l	transmembrane 131 like [Source:MGI Symbol;Acc:MGI:2443399]	3	-1.61458	0.0144868	0.144838	1.5968	0.987455
ENSMUSG00000045349	Sh2d5	SH2 domain containing 5 [Source:MGI Symbol;Acc:MGI:2446215]	4	-2.00079	0.0144892	0.144838	3.51962	1.75681
ENSMUSG00000022587	Ly6e	lymphocyte antigen 6 complex, locus E [Source:MGI Symbol;Acc:MGI:106651]	15	2.08446	0.0145053	0.144838	1.35957	2.85062
ENSMUSG00000071226	Cecr2	CECR2, histone acetyl-lysine reader [Source:MGI Symbol;Acc:MGI:1923799]	6	-1.64811	0.0145062	0.144838	4.11096	2.49378
ENSMUSG00000040296	Ddx58	DEAD/H box helicase 58 [Source:MGI Symbol;Acc:MGI:2442858]	4	1.98682	0.0145233	0.144915	1.63777	3.25537
ENSMUSG00000023348	Trip6	thyroid hormone receptor interactor 6 [Source:MGI Symbol;Acc:MGI:1343458]	5	1.53373	0.0145319	0.144915	7.37495	11.3044
ENSMUSG00000024451	Arap3	ArfGAP with RhoGAP domain, ankyrin repeat and PH domain 3 [Source:MGI Symbol;Acc:MGI:2147274]	18	4.45098	0.0145617	0.145121	0.072125	0.332477
ENSMUSG00000029161	Cgref1	cell growth regulator with EF hand domain 1 [Source:MGI Symbol;Acc:MGI:1915817]	5	-3.34801	0.0145705	0.145121	20.3419	6.07721
ENSMUSG00000100600	A230077H06Rik	RIKEN cDNA A230077H06 gene [Source:MGI Symbol;Acc:MGI:2443592]	7	-2.69515	0.0145959	0.145285	0.701471	0.258355
ENSMUSG00000111212	5330432J10Rik	RIKEN cDNA 5330432J10 gene [Source:MGI Symbol;Acc:MGI:2443489]	9	1.84807	0.0146406	0.145606	5.2205	9.65193
ENSMUSG00000038526	Car14	carbonic anhydrase 14 [Source:MGI Symbol;Acc:MGI:1344341]	3	1.54062	0.0146463	0.145606	31.8711	49.098
ENSMUSG00000047298	Kcnv2	potassium channel, subfamily V, member 2 [Source:MGI Symbol;Acc:MGI:2670981]	19	-1.9273	0.0146732	0.145725	22.8507	11.8538
ENSMUSG00000033581	Igf2bp2	insulin-like growth factor 2 mRNA binding protein 2 [Source:MGI Symbol;Acc:MGI:1890358]	16	-1.63613	0.0146763	0.145725	7.01423	4.28495
ENSMUSG00000035620	Ric8b	RIC8 guanine nucleotide exchange factor B [Source:MGI Symbol;Acc:MGI:2682307]	10	-1.4559	0.0146964	0.145836	14.5384	9.98401
ENSMUSG00000028465	Tln1	talin 1 [Source:MGI Symbol;Acc:MGI:1099832]	4	1.51878	0.0147214	0.145994	25.3173	38.4509
ENSMUSG00000001418	Glmp	glycosylated lysosomal membrane protein [Source:MGI Symbol;Acc:MGI:1913318]	3	1.64984	0.0147484	0.146172	1.93724	3.19224
ENSMUSG00000069814	Ccdc92b	coiled-coil domain containing 92B [Source:MGI Symbol;Acc:MGI:3588240]	11	-2.40353	0.0147994	0.146588	2.12064	0.882036
ENSMUSG00000040613	Apobec1	apolipoprotein B mRNA editing enzyme, catalytic polypeptide 1 [Source:MGI Symbol;Acc:MGI:103298]	6	3.33451	0.0148093	0.146596	0.21772	0.748264
ENSMUSG00000032087	Dscaml1	DS cell adhesion molecule like 1 [Source:MGI Symbol;Acc:MGI:2150309]	9	-2.30654	0.0148347	0.146757	20.8628	9.04394
ENSMUSG00000090084	Srpx	sushi-repeat-containing protein [Source:MGI Symbol;Acc:MGI:1858306]	X	-3.74536	0.0148655	0.146972	1.4115	0.372313
ENSMUSG00000105528	Gm43519	predicted gene 43519 [Source:MGI Symbol;Acc:MGI:5663656]	5	4.65151	0.0149337	0.147556	0.491032	2.33546
ENSMUSG00000053519	Kcnip1	Kv channel-interacting protein 1 [Source:MGI Symbol;Acc:MGI:1917607]	11	-2.24744	0.0149584	0.14771	1.11942	0.497151
ENSMUSG00000052302	Tbc1d30	TBC1 domain family, member 30 [Source:MGI Symbol;Acc:MGI:1921944]	10	-1.79298	0.0149924	0.147955	5.21051	2.90539
ENSMUSG00000041992	Rapgef5	Rap guanine nucleotide exchange factor (GEF) 5 [Source:MGI Symbol;Acc:MGI:2444365]	12	-1.73348	0.0150169	0.148031	6.06065	3.49567
ENSMUSG00000000631	Myo18a	myosin XVIIIA [Source:MGI Symbol;Acc:MGI:2667185]	11	1.48105	0.0150184	0.148031	17.9568	26.5953
ENSMUSG00000040681	Hmgn1	high mobility group nucleosomal binding domain 1 [Source:MGI Symbol;Acc:MGI:96120]	16	-1.5364	0.0150343	0.148097	84.0185	54.6878
ENSMUSG00000034777	Vax2	ventral anterior homeobox 2 [Source:MGI Symbol;Acc:MGI:1346018]	6	-2.58245	0.0150652	0.148228	17.4761	6.77498
ENSMUSG00000091402	Rd3l	retinal degeneration 3-like [Source:MGI Symbol;Acc:MGI:2675860]	12	-2.04632	0.015066	0.148228	7.56574	3.69344
ENSMUSG00000026609	Ush2a	usherin [Source:MGI Symbol;Acc:MGI:1341292]	1	-2.04764	0.0150936	0.14841	19.3578	9.45294
ENSMUSG00000054027	Nt5dc3	5'-nucleotidase domain containing 3 [Source:MGI Symbol;Acc:MGI:3513266]	10	-1.98785	0.0151128	0.148508	5.66592	2.84997
ENSMUSG00000041607	Mbp	myelin basic protein [Source:MGI Symbol;Acc:MGI:96925]	18	-2.15957	0.015253	0.149795	1.84087	0.851666
ENSMUSG00000030411	Nova2	NOVA alternative splicing regulator 2 [Source:MGI Symbol;Acc:MGI:104296]	7	-1.96358	0.0152856	0.150008	2.07142	1.05399
ENSMUSG00000052214	Opa3	optic atrophy 3 [Source:MGI Symbol;Acc:MGI:2686271]	7	-1.60165	0.0152933	0.150008	6.72819	4.20239
ENSMUSG00000049353	Rd3	retinal degeneration 3 [Source:MGI Symbol;Acc:MGI:1921273]	1	-2.11454	0.0153051	0.150033	15.8613	7.49841
ENSMUSG00000103094	Gm37558	predicted gene, 37558 [Source:MGI Symbol;Acc:MGI:5610786]	3	1.84822	0.0153428	0.150311	2.04644	3.7951
ENSMUSG00000083282	Ctsf	cathepsin F [Source:MGI Symbol;Acc:MGI:1861434]	19	1.4574	0.0153542	0.150331	15.7686	22.9797
ENSMUSG00000020782	Llgl2	LLGL2 scribble cell polarity complex component [Source:MGI Symbol;Acc:MGI:1918843]	11	-1.62296	0.0154076	0.150763	14.0355	8.64679
ENSMUSG00000106385	Gm42943	predicted gene 42943 [Source:MGI Symbol;Acc:MGI:5663080]	3	-3.36931	0.0154288	0.150857	0.588107	0.170623
ENSMUSG00000013419	Zfp651	zinc finger protein 651 [Source:MGI Symbol;Acc:MGI:2670992]	9	1.56482	0.0154556	0.150857	7.12928	11.1534
ENSMUSG00000103887	Gm37008	predicted gene, 37008 [Source:MGI Symbol;Acc:MGI:5610236]	7	3.24249	0.0154604	0.150857	1.25433	4.16071
ENSMUSG00000034799	Unc13a	unc-13 homolog A [Source:MGI Symbol;Acc:MGI:3051532]	8	-2.17635	0.0154619	0.150857	6.20144	2.84844
ENSMUSG00000040618	Pck2	phosphoenolpyruvate carboxykinase 2 (mitochondrial) [Source:MGI Symbol;Acc:MGI:1860456]	14	1.77444	0.0154715	0.150857	1.09002	1.93649
ENSMUSG00000046110	Serinc4	serine incorporator 4 [Source:MGI Symbol;Acc:MGI:2441842]	2	-2.00011	0.0154732	0.150857	4.63142	2.31462
ENSMUSG00000024498	Tcerg1	transcription elongation regulator 1 (CA150) [Source:MGI Symbol;Acc:MGI:1926421]	18	-1.49432	0.0154945	0.150898	21.0152	14.0632
ENSMUSG00000107448	Gm43947	predicted gene, 43947 [Source:MGI Symbol;Acc:MGI:5690339]	6	4.09379	0.0154961	0.150898	0.306646	1.25465
ENSMUSG00000107529	Gm44291	predicted gene, 44291 [Source:MGI Symbol;Acc:MGI:5690683]	2	2.65452	0.0155119	0.150953	0.329759	0.883134
ENSMUSG00000040265	Dnm3	dynamin 3 [Source:MGI Symbol;Acc:MGI:1341299]	1	-1.763	0.0155204	0.150953	5.85365	3.31964
ENSMUSG00000021939	Ctsb	cathepsin B [Source:MGI Symbol;Acc:MGI:88561]	14	1.48357	0.0156077	0.151678	37.75	56.0045
ENSMUSG00000117421	Gm41639	predicted gene, 41639 [Source:MGI Symbol;Acc:MGI:5624524]	17	5.44442	0.0156142	0.151678	0.48543	2.77157
ENSMUSG00000046027	Stard5	StAR-related lipid transfer (START) domain containing 5 [Source:MGI Symbol;Acc:MGI:2156765]	7	2.1869	0.0156232	0.151678	0.642323	1.40619
ENSMUSG00000020334	Slc22a4	solute carrier family 22 (organic cation transporter), member 4 [Source:MGI Symbol;Acc:MGI:1353479]	11	-2.41138	0.0156416	0.151765	14.7178	6.10562
ENSMUSG00000046049	Rp1l1	retinitis pigmentosa 1 homolog like 1 [Source:MGI Symbol;Acc:MGI:2384303]	14	-2.18998	0.0156834	0.15205	39.7454	18.1469
ENSMUSG00000025738	Fbxl16	F-box and leucine-rich repeat protein 16 [Source:MGI Symbol;Acc:MGI:2448488]	17	-2.01778	0.0156982	0.15205	16.9144	8.3804
ENSMUSG00000105302	Gm19817	predicted gene, 19817 [Source:MGI Symbol;Acc:MGI:5012002]	3	5.40339	0.015704	0.15205	0.258268	1.42312
ENSMUSG00000095930	Nim1k	NIM1 serine/threonine protein kinase [Source:MGI Symbol;Acc:MGI:2442399]	13	-2.41841	0.0157086	0.15205	4.03088	1.66439
ENSMUSG00000022054	Nefm	neurofilament, medium polypeptide [Source:MGI Symbol;Acc:MGI:97314]	14	-1.48967	0.0157597	0.152454	7.98974	5.36339
ENSMUSG00000005233	Spc25	SPC25, NDC80 kinetochore complex component, homolog (S. cerevisiae) [Source:MGI Symbol;Acc:MGI:1913692]	2	-2.20433	0.01577	0.152463	14.9082	6.76109
ENSMUSG00000079547	H2-DMb1	histocompatibility 2, class II, locus Mb1 [Source:MGI Symbol;Acc:MGI:95922]	17	2.08264	0.0158106	0.152763	1.35845	2.82754
ENSMUSG00000050711	Scg2	secretogranin II [Source:MGI Symbol;Acc:MGI:103033]	1	-1.91902	0.0158249	0.15281	33.2953	17.3455
ENSMUSG00000052861	Dnah6	dynein, axonemal, heavy chain 6 [Source:MGI Symbol;Acc:MGI:107744]	6	3.08304	0.015839	0.152855	0.0283325	0.0885667
ENSMUSG00000032743	Katnip	katanin interacting protein [Source:MGI Symbol;Acc:MGI:2442760]	7	-1.65594	0.0158518	0.152885	5.34515	3.22719
ENSMUSG00000039137	Whrn	whirlin [Source:MGI Symbol;Acc:MGI:2682003]	4	-1.56194	0.015861	0.152885	16.4403	10.5243
ENSMUSG00000037260	Hgsnat	heparan-alpha-glucosaminide N-acetyltransferase [Source:MGI Symbol;Acc:MGI:1196297]	8	1.66545	0.0158969	0.153139	6.61884	11.0145
ENSMUSG00000002210	Smg9	smg-9 homolog, nonsense mediated mRNA decay factor (C. elegans) [Source:MGI Symbol;Acc:MGI:1919247]	7	-1.74545	0.0159206	0.153234	4.57136	2.61619
ENSMUSG00000004317	Clcn5	chloride channel, voltage-sensitive 5 [Source:MGI Symbol;Acc:MGI:99486]	X	1.8259	0.0159304	0.153234	0.882391	1.61514
ENSMUSG00000064373	Selenop	selenoprotein P [Source:MGI Symbol;Acc:MGI:894288]	15	1.58513	0.0159352	0.153234	18.1617	28.7812
ENSMUSG00000029064	Gnb1	guanine nucleotide binding protein (G protein), beta 1 [Source:MGI Symbol;Acc:MGI:95781]	4	-1.77704	0.0159966	0.153733	349.916	196.909
ENSMUSG00000026163	Sphkap	SPHK1 interactor, AKAP domain containing [Source:MGI Symbol;Acc:MGI:1924879]	1	-2.03341	0.0160392	0.15405	10.6932	5.25772
ENSMUSG00000071379	Hpcal1	hippocalcin-like 1 [Source:MGI Symbol;Acc:MGI:1855689]	12	1.74938	0.0160516	0.154079	9.60932	16.8356
ENSMUSG00000005251	Ripk4	receptor-interacting serine-threonine kinase 4 [Source:MGI Symbol;Acc:MGI:1919638]	16	2.37428	0.0160905	0.154322	0.663758	1.57826
ENSMUSG00000097187	Gm19426	predicted gene, 19426 [Source:MGI Symbol;Acc:MGI:5011611]	2	3.18278	0.0160961	0.154322	0.967922	3.08749
ENSMUSG00000037949	Ano10	anoctamin 10 [Source:MGI Symbol;Acc:MGI:2143103]	9	1.67803	0.0161108	0.154372	2.37243	3.97849
ENSMUSG00000031352	Hccs	holocytochrome c synthetase [Source:MGI Symbol;Acc:MGI:106911]	X	-1.65083	0.0161314	0.154477	3.42855	2.07595
ENSMUSG00000042363	Lgalsl	lectin, galactoside binding-like [Source:MGI Symbol;Acc:MGI:1916114]	11	-1.69479	0.01616	0.154602	17.5695	10.3639
ENSMUSG00000108195	Gm44415	predicted gene, 44415 [Source:MGI Symbol;Acc:MGI:5690807]	6	3.93316	0.0161636	0.154602	0.188655	0.762182
ENSMUSG00000047034	Ankrd33	ankyrin repeat domain 33 [Source:MGI Symbol;Acc:MGI:2443398]	15	-1.8717	0.0162618	0.155449	21.3666	11.4108
ENSMUSG00000055612	Cdca7	cell division cycle associated 7 [Source:MGI Symbol;Acc:MGI:1914203]	2	2.93604	0.0162823	0.155553	0.606931	1.78961
ENSMUSG00000046093	Hpcal4	hippocalcin-like 4 [Source:MGI Symbol;Acc:MGI:2157521]	4	-2.13755	0.0163063	0.155643	3.6395	1.69931
ENSMUSG00000026656	Fcgr2b	Fc receptor, IgG, low affinity IIb [Source:MGI Symbol;Acc:MGI:95499]	1	3.92638	0.0163122	0.155643	0.112824	0.451926
ENSMUSG00000044768	Macir	macrophage immunometabolism regulator [Source:MGI Symbol;Acc:MGI:1277184]	1	-1.87308	0.0163206	0.155643	2.01561	1.07606
ENSMUSG00000025934	Gsta3	glutathione S-transferase, alpha 3 [Source:MGI Symbol;Acc:MGI:95856]	1	2.22244	0.0163507	0.155776	0.735508	1.64474
ENSMUSG00000030790	Adm	adrenomedullin [Source:MGI Symbol;Acc:MGI:108058]	7	-2.35156	0.0163576	0.155776	31.4979	13.3985
ENSMUSG00000021583	Erap1	endoplasmic reticulum aminopeptidase 1 [Source:MGI Symbol;Acc:MGI:1933403]	13	1.64838	0.0163635	0.155776	2.86483	4.72066
ENSMUSG00000025776	Crispld1	cysteine-rich secretory protein LCCL domain containing 1 [Source:MGI Symbol;Acc:MGI:1934666]	1	4.25936	0.0163888	0.155925	0.172715	0.748548
ENSMUSG00000074346	Kcnd3os	potassium voltage-gated channel, Shal-related family, member 3, opposite strand [Source:MGI Symbol;Acc:MGI:1925885]	3	-3.09805	0.0164159	0.156091	1.33265	0.426148
ENSMUSG00000061603	Akap6	A kinase (PRKA) anchor protein 6 [Source:MGI Symbol;Acc:MGI:3050566]	12	-1.82652	0.0164518	0.156268	8.06185	4.4133
ENSMUSG00000037126	Psd	pleckstrin and Sec7 domain containing [Source:MGI Symbol;Acc:MGI:1920978]	19	-2.00744	0.0164542	0.156268	12.1028	6.02725
ENSMUSG00000032258	Lca5	Leber congenital amaurosis 5 (human) [Source:MGI Symbol;Acc:MGI:1923032]	9	-1.79435	0.0164669	0.156268	9.48968	5.28691
ENSMUSG00000085408	C530005A16Rik	RIKEN cDNA C530005A16 gene [Source:MGI Symbol;Acc:MGI:3612454]	4	3.99949	0.0164731	0.156268	0.182175	0.753915
ENSMUSG00000043635	Adamts3	a disintegrin-like and metallopeptidase (reprolysin type) with thrombospondin type 1 motif, 3 [Source:MGI Symbol;Acc:MGI:3045353]	5	-2.39542	0.0164935	0.156369	9.26071	3.86354
ENSMUSG00000032965	Ift57	intraflagellar transport 57 [Source:MGI Symbol;Acc:MGI:1921166]	16	1.5389	0.016572	0.156967	10.3387	15.9045
ENSMUSG00000113780	Gm33195	predicted gene, 33195 [Source:MGI Symbol;Acc:MGI:5592354]	13	-2.29212	0.016576	0.156967	2.79729	1.21412
ENSMUSG00000047632	Fgfbp3	fibroblast growth factor binding protein 3 [Source:MGI Symbol;Acc:MGI:1919764]	19	3.1492	0.0165938	0.157044	0.618106	1.9673
ENSMUSG00000060798	Intu	inturned planar cell polarity protein [Source:MGI Symbol;Acc:MGI:2443752]	3	-1.68921	0.0166215	0.157098	2.11014	1.24815
ENSMUSG00000096210	H1f0	H1.0 linker histone [Source:MGI Symbol;Acc:MGI:95893]	15	1.56882	0.0166301	0.157098	28.812	45.1864
ENSMUSG00000039753	Fbxl5	F-box and leucine-rich repeat protein 5 [Source:MGI Symbol;Acc:MGI:2152883]	5	-1.4904	0.0166344	0.157098	14.5533	9.76474
ENSMUSG00000021067	Sav1	salvador family WW domain containing 1 [Source:MGI Symbol;Acc:MGI:1927144]	12	1.58468	0.0166385	0.157098	8.26644	13.098
ENSMUSG00000032411	Tfdp2	transcription factor Dp 2 [Source:MGI Symbol;Acc:MGI:107167]	9	1.53829	0.0167185	0.157761	1.74036	2.67569
ENSMUSG00000021592	Arsk	arylsulfatase K [Source:MGI Symbol;Acc:MGI:1924291]	13	1.87047	0.0167347	0.157822	1.01824	1.89988
ENSMUSG00000039976	Tbc1d16	TBC1 domain family, member 16 [Source:MGI Symbol;Acc:MGI:2652878]	11	1.6146	0.0167606	0.157935	1.54251	2.48988
ENSMUSG00000022025	Cnmd	chondromodulin [Source:MGI Symbol;Acc:MGI:1341171]	14	2.33094	0.0167662	0.157935	1.65941	3.89311
ENSMUSG00000075590	Nrbp2	nuclear receptor binding protein 2 [Source:MGI Symbol;Acc:MGI:2385017]	15	1.47584	0.0169492	0.159566	11.775	17.3745
ENSMUSG00000041272	Tox	thymocyte selection-associated high mobility group box [Source:MGI Symbol;Acc:MGI:2181659]	4	1.96351	0.0170055	0.160003	1.35245	2.66074
ENSMUSG00000021365	Nedd9	neural precursor cell expressed, developmentally down-regulated gene 9 [Source:MGI Symbol;Acc:MGI:97302]	13	1.7052	0.0170497	0.16025	19.5948	33.4091
ENSMUSG00000032802	Srxn1	sulfiredoxin 1 homolog (S. cerevisiae) [Source:MGI Symbol;Acc:MGI:104971]	2	-2.48091	0.0170517	0.16025	241.458	97.3255
ENSMUSG00000029233	Srd5a3	steroid 5 alpha-reductase 3 [Source:MGI Symbol;Acc:MGI:1930252]	5	1.65022	0.0170678	0.160298	1.97901	3.26856
ENSMUSG00000004631	Sgce	sarcoglycan, epsilon [Source:MGI Symbol;Acc:MGI:1329042]	6	1.53021	0.0170818	0.160298	1.54008	2.35819
ENSMUSG00000052688	Rab7b	RAB7B, member RAS oncogene family [Source:MGI Symbol;Acc:MGI:2442295]	1	-2.20394	0.0170866	0.160298	5.0443	2.28863
ENSMUSG00000102145	Gm38056	predicted gene, 38056 [Source:MGI Symbol;Acc:MGI:5611284]	1	2.57908	0.0171115	0.160439	0.230978	0.606626
ENSMUSG00000006218	Fam131c	family with sequence similarity 131, member C [Source:MGI Symbol;Acc:MGI:2685539]	4	-3.70489	0.0171477	0.160685	0.798293	0.209849
ENSMUSG00000063919	Srrm4	serine/arginine repetitive matrix 4 [Source:MGI Symbol;Acc:MGI:1916205]	5	-1.81249	0.0171601	0.160708	6.69332	3.69241
ENSMUSG00000027221	Chst1	carbohydrate sulfotransferase 1 [Source:MGI Symbol;Acc:MGI:1924219]	2	2.0021	0.0172542	0.161454	2.23707	4.49622
ENSMUSG00000039607	Rbms3	RNA binding motif, single stranded interacting protein [Source:MGI Symbol;Acc:MGI:2444477]	9	1.85706	0.0172702	0.161454	0.494771	0.923098
ENSMUSG00000020659	Cbll1	Casitas B-lineage lymphoma-like 1 [Source:MGI Symbol;Acc:MGI:2144842]	12	-1.60026	0.0172761	0.161454	4.13255	2.58513
ENSMUSG00000108841	Frmpd2	FERM and PDZ domain containing 2 [Source:MGI Symbol;Acc:MGI:2685472]	14	-2.14412	0.0172797	0.161454	13.7879	6.42784
ENSMUSG00000021701	Plk2	polo like kinase 2 [Source:MGI Symbol;Acc:MGI:1099790]	13	-2.30157	0.0172983	0.161534	71.3359	30.9945
ENSMUSG00000030782	Tgfb1i1	transforming growth factor beta 1 induced transcript 1 [Source:MGI Symbol;Acc:MGI:102784]	7	1.70016	0.0173394	0.161825	1.28224	2.18662
ENSMUSG00000021360	Gcnt2	glucosaminyl (N-acetyl) transferase 2, I-branching enzyme [Source:MGI Symbol;Acc:MGI:1100870]	13	1.7486	0.0173719	0.161948	5.58175	9.76254
ENSMUSG00000039316	Rftn1	raftlin lipid raft linker 1 [Source:MGI Symbol;Acc:MGI:1923688]	17	1.99291	0.0173727	0.161948	0.581254	1.16419
ENSMUSG00000046169	Adamts6	a disintegrin-like and metallopeptidase (reprolysin type) with thrombospondin type 1 motif, 6 [Source:MGI Symbol;Acc:MGI:1347348]	13	2.01919	0.0174021	0.162027	1.90149	3.83712
ENSMUSG00000046402	Rbp1	retinol binding protein 1, cellular [Source:MGI Symbol;Acc:MGI:97876]	9	1.81016	0.0174093	0.162027	4.34447	7.86538
ENSMUSG00000022940	Pigp	phosphatidylinositol glycan anchor biosynthesis, class P [Source:MGI Symbol;Acc:MGI:1860433]	16	1.76819	0.0174112	0.162027	3.12167	5.52955
ENSMUSG00000043051	Disc1	disrupted in schizophrenia 1 [Source:MGI Symbol;Acc:MGI:2447658]	8	2.40509	0.0174311	0.162048	0.255556	0.623185
ENSMUSG00000033669	Zfp7	zinc finger protein 7 [Source:MGI Symbol;Acc:MGI:99208]	15	-2.05694	0.0174386	0.162048	1.26172	0.610334
ENSMUSG00000021364	Elovl2	elongation of very long chain fatty acids (FEN1/Elo2, SUR4/Elo3, yeast)-like 2 [Source:MGI Symbol;Acc:MGI:1858960]	13	-1.93414	0.0174436	0.162048	4.55691	2.35536
ENSMUSG00000102225	Gm37983	predicted gene, 37983 [Source:MGI Symbol;Acc:MGI:5611211]	9	3.42193	0.0174539	0.162051	0.288966	1.00264
ENSMUSG00000027860	Vangl1	VANGL planar cell polarity 1 [Source:MGI Symbol;Acc:MGI:2159344]	3	1.92961	0.0175083	0.162463	0.840273	1.62292
ENSMUSG00000029663	Gngt1	guanine nucleotide binding protein (G protein), gamma transducing activity polypeptide 1 [Source:MGI Symbol;Acc:MGI:109165]	6	-1.93428	0.01754	0.162634	64.4505	33.3171
ENSMUSG00000034187	Nsf	N-ethylmaleimide sensitive fusion protein [Source:MGI Symbol;Acc:MGI:104560]	11	-1.83909	0.017547	0.162634	22.6855	12.3337
ENSMUSG00000046792	Zfp787	zinc finger protein 787 [Source:MGI Symbol;Acc:MGI:1914359]	7	-1.52286	0.0176474	0.163471	5.6303	3.69781
ENSMUSG00000020431	Adcy1	adenylate cyclase 1 [Source:MGI Symbol;Acc:MGI:99677]	11	-1.566	0.0176628	0.16352	19.4427	12.4162
ENSMUSG00000050248	Evc2	EvC ciliary complex subunit 2 [Source:MGI Symbol;Acc:MGI:1915775]	5	1.6368	0.0177688	0.16427	5.73608	9.38726
ENSMUSG00000021803	Cdhr1	cadherin-related family member 1 [Source:MGI Symbol;Acc:MGI:2157782]	14	-1.99815	0.0177714	0.16427	78.9459	39.507
ENSMUSG00000057367	Birc2	baculoviral IAP repeat-containing 2 [Source:MGI Symbol;Acc:MGI:1197009]	9	1.53175	0.0177754	0.16427	12.8153	19.6313
ENSMUSG00000023192	Grm2	glutamate receptor, metabotropic 2 [Source:MGI Symbol;Acc:MGI:1351339]	9	-2.78931	0.0177866	0.16427	0.684848	0.244617
ENSMUSG00000057614	Gnai1	guanine nucleotide binding protein (G protein), alpha inhibiting 1 [Source:MGI Symbol;Acc:MGI:95771]	5	1.68587	0.0177946	0.16427	2.94161	4.97277
ENSMUSG00000017376	Nlk	nemo like kinase [Source:MGI Symbol;Acc:MGI:1201387]	11	-1.58395	0.0178049	0.164271	17.6991	11.1733
ENSMUSG00000043496	Tril	TLR4 interactor with leucine-rich repeats [Source:MGI Symbol;Acc:MGI:1914123]	6	1.85283	0.017872	0.164796	3.72152	6.89353
ENSMUSG00000020758	Itgb4	integrin beta 4 [Source:MGI Symbol;Acc:MGI:96613]	11	3.6247	0.0179254	0.165119	0.191844	0.700873
ENSMUSG00000023008	Fmnl3	formin-like 3 [Source:MGI Symbol;Acc:MGI:109569]	15	1.64599	0.017928	0.165119	3.81782	6.27588
ENSMUSG00000030340	Scnn1a	sodium channel, nonvoltage-gated 1 alpha [Source:MGI Symbol;Acc:MGI:101782]	6	2.73023	0.0179377	0.165119	0.278892	0.758538
ENSMUSG00000114310	Gm48602	predicted gene, 48602 [Source:MGI Symbol;Acc:MGI:6098182]	14	2.79742	0.0179556	0.16519	0.332957	0.941967
ENSMUSG00000027238	Frmd5	FERM domain containing 5 [Source:MGI Symbol;Acc:MGI:2442557]	2	-2.1619	0.0179721	0.16521	4.72658	2.18523
ENSMUSG00000041324	Inhba	inhibin beta-A [Source:MGI Symbol;Acc:MGI:96570]	13	-2.19361	0.0179783	0.16521	95.8369	43.6889
ENSMUSG00000032180	Tmed1	transmembrane p24 trafficking protein 1 [Source:MGI Symbol;Acc:MGI:106201]	9	1.87986	0.0180422	0.165703	4.26683	8.00809
ENSMUSG00000019971	Cep290	centrosomal protein 290 [Source:MGI Symbol;Acc:MGI:2384917]	10	-1.60061	0.0180852	0.165993	14.2698	8.91463
ENSMUSG00000021947	Cryl1	crystallin, lambda 1 [Source:MGI Symbol;Acc:MGI:1915881]	14	2.29822	0.018118	0.165993	0.527961	1.21837
ENSMUSG00000025092	Hspa12a	heat shock protein 12A [Source:MGI Symbol;Acc:MGI:1920692]	19	-1.90301	0.0181403	0.165993	6.89098	3.62031
ENSMUSG00000026883	Dab2ip	disabled 2 interacting protein [Source:MGI Symbol;Acc:MGI:1916851]	2	1.47046	0.0181513	0.165993	11.2523	16.551
ENSMUSG00000053965	Pde5a	phosphodiesterase 5A, cGMP-specific [Source:MGI Symbol;Acc:MGI:2651499]	3	1.92432	0.0181535	0.165993	1.20035	2.31494
ENSMUSG00000038257	Glra3	glycine receptor, alpha 3 subunit [Source:MGI Symbol;Acc:MGI:95749]	8	-2.80055	0.0181569	0.165993	0.903945	0.321253
ENSMUSG00000038335	Tsr1	TSR1 20S rRNA accumulation [Source:MGI Symbol;Acc:MGI:2144566]	11	-1.79471	0.0181569	0.165993	9.53122	5.3097
ENSMUSG00000116884	C130040N14Rik	RIKEN cDNA C130040N14 gene [Source:MGI Symbol;Acc:MGI:3588257]	17	2.44109	0.018158	0.165993	0.750296	1.84946
ENSMUSG00000042489	Clspn	claspin [Source:MGI Symbol;Acc:MGI:2445153]	4	2.41875	0.018168	0.165993	0.175602	0.424596
ENSMUSG00000030287	Itpr2	inositol 1,4,5-triphosphate receptor 2 [Source:MGI Symbol;Acc:MGI:99418]	6	1.49361	0.0181765	0.165993	2.46877	3.68819
ENSMUSG00000076435	Acsf2	acyl-CoA synthetase family member 2 [Source:MGI Symbol;Acc:MGI:2388287]	11	1.65421	0.0181983	0.166016	4.46695	7.37766
ENSMUSG00000036862	Dchs1	dachsous cadherin related 1 [Source:MGI Symbol;Acc:MGI:2685011]	7	1.81736	0.0182096	0.166016	1.01282	1.84522
ENSMUSG00000029544	Cabp1	calcium binding protein 1 [Source:MGI Symbol;Acc:MGI:1352750]	5	-1.86051	0.0182098	0.166016	8.31147	4.46619
ENSMUSG00000030930	Chst15	carbohydrate sulfotransferase 15 [Source:MGI Symbol;Acc:MGI:1924840]	7	1.79142	0.0182477	0.166195	1.5003	2.68953
ENSMUSG00000030157	Clec2d	C-type lectin domain family 2, member d [Source:MGI Symbol;Acc:MGI:2135589]	6	1.89174	0.0182501	0.166195	3.5544	6.72318
ENSMUSG00000007950	Abhd8	abhydrolase domain containing 8 [Source:MGI Symbol;Acc:MGI:1918946]	8	-1.48832	0.0183131	0.166675	12.8398	8.6292
[truncated: 14,380 more rows]

## Sheet: Statistically Significant
gene_id	SYMBOL	DESCRIPTION	SEQNAME	Fold_Change	PValue	FDR	WT_6H_Avg_FPKM	FB_6H_Avg_FPKM
[truncated: 874 more rows]

[truncated: 1 more sheets: Biologically Significant]
